# Supplementary material for: One third of dynamic protein expression profiles can be predicted by a simple rate equation
Source: Royal Society of Chemistry journal article supplement (doi:10.1039/c4mb00358f), 2014-08-01

OYE2

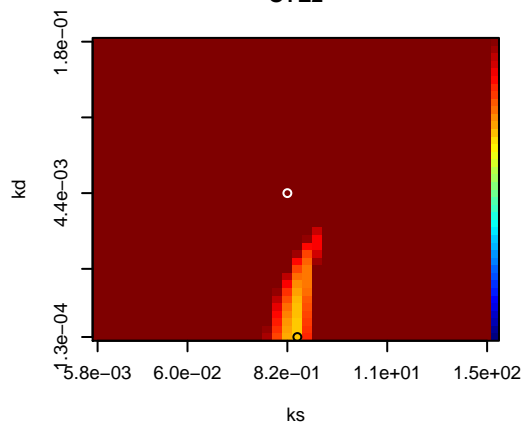

AAH1

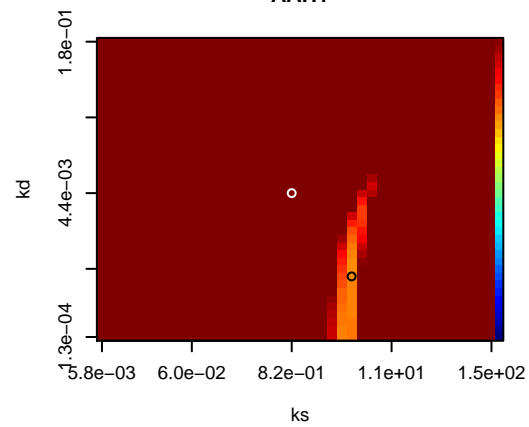

BAT1

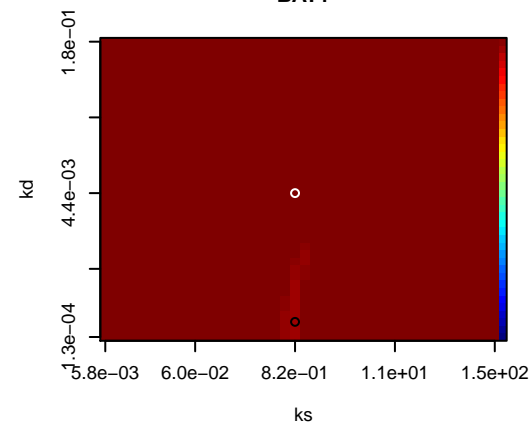

THR1

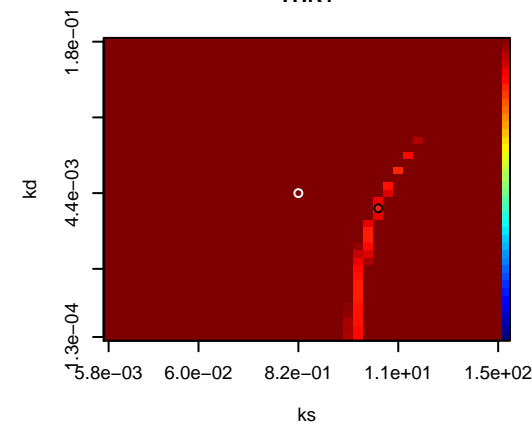

NSG2

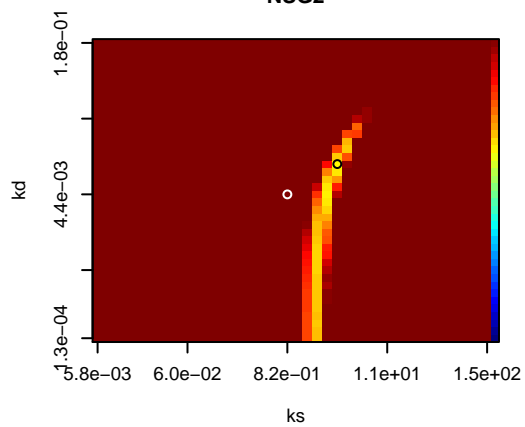

GRX2

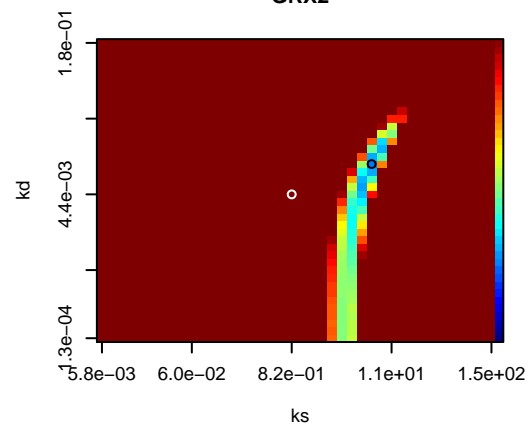

YMR090W

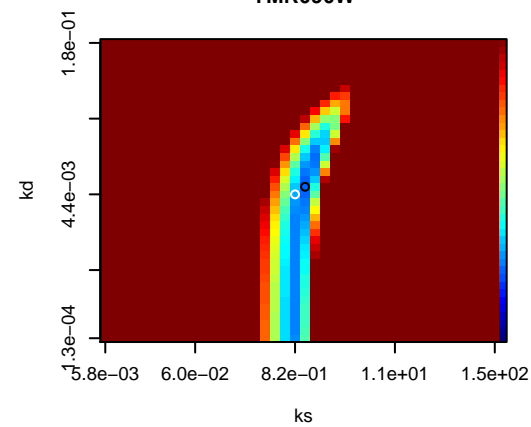

GOR1

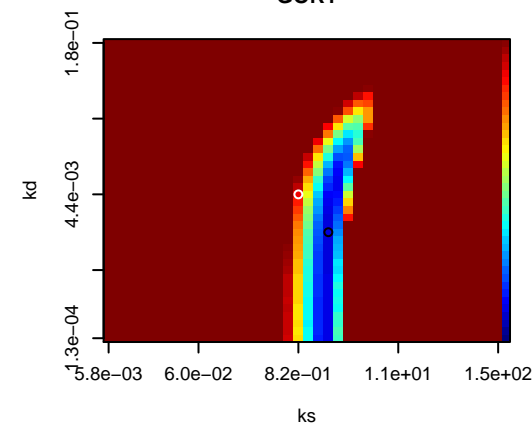

PST2

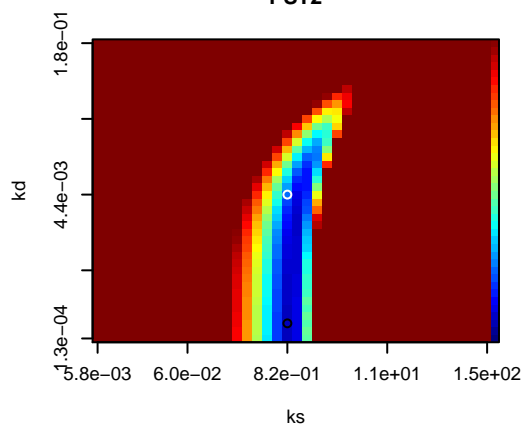

ALD4

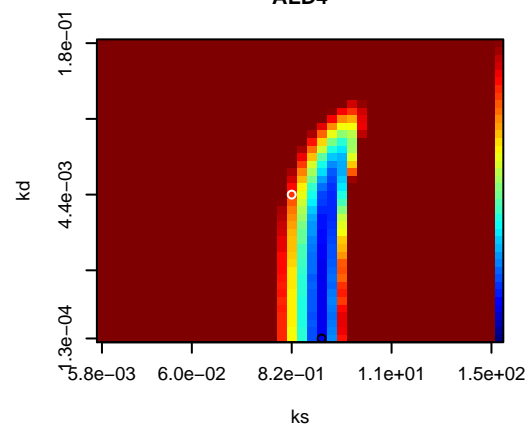

HYR1

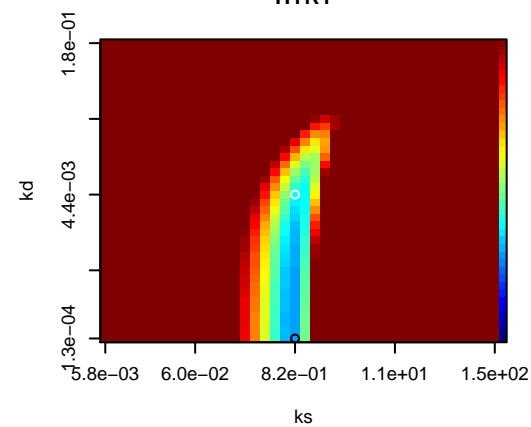

HXK1

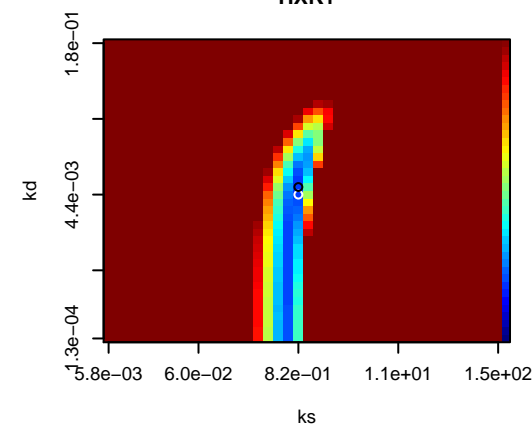

**GAD1**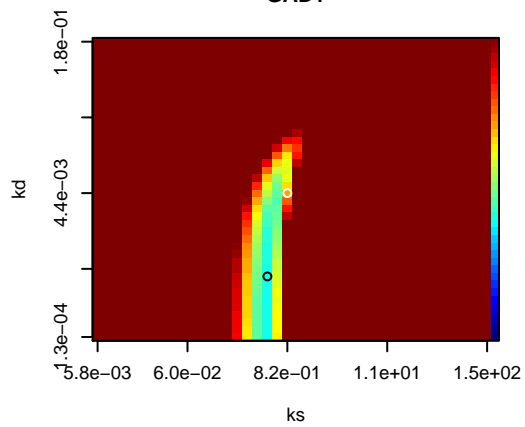**QCR2**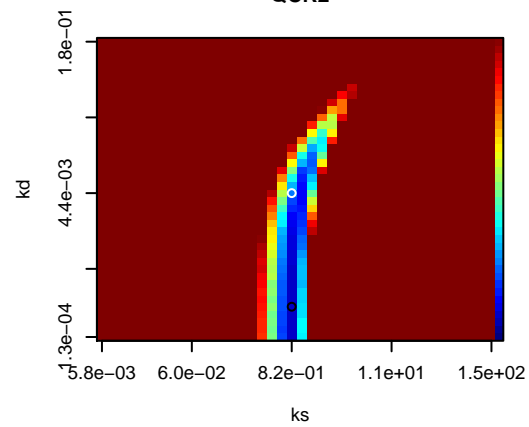**NDI1**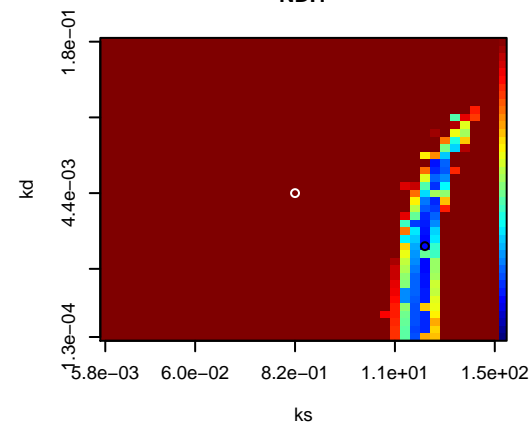**GRE2**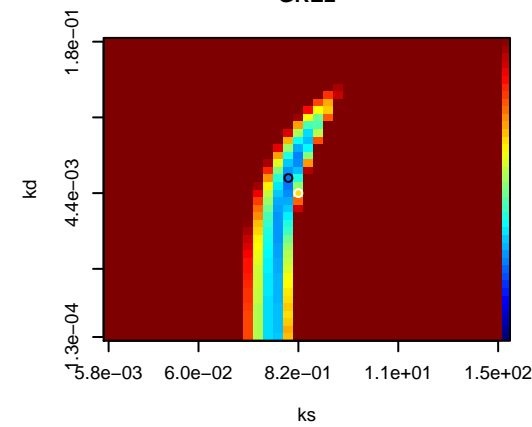**MRP8**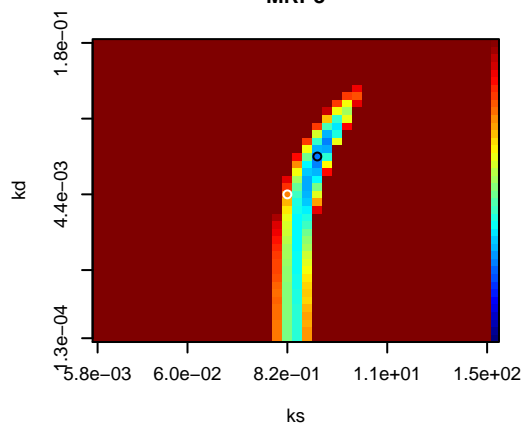**HSP10**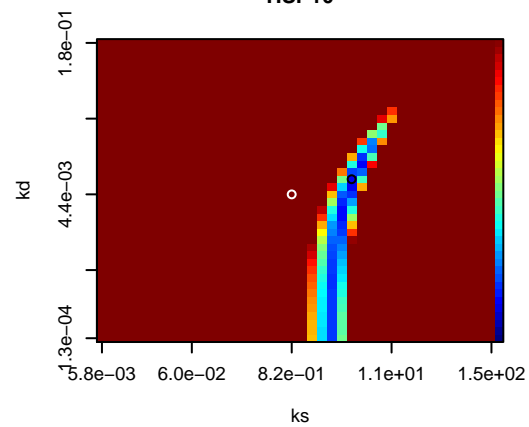**CIT1**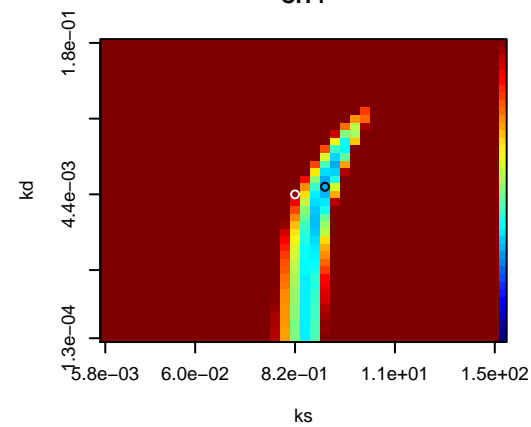**ARX1**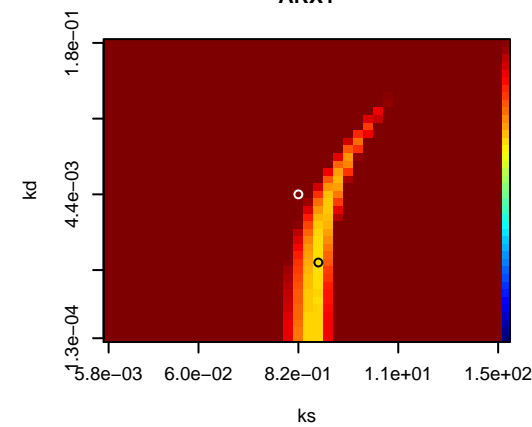**SOD1**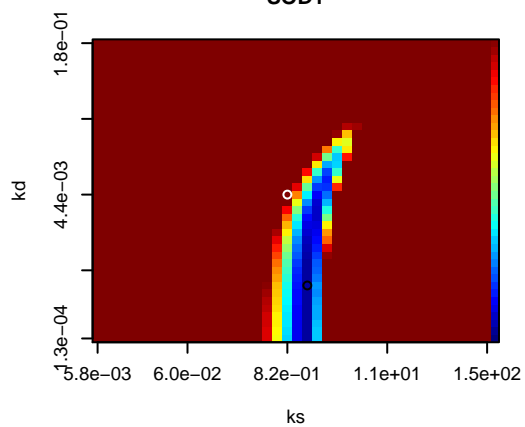**CDC48**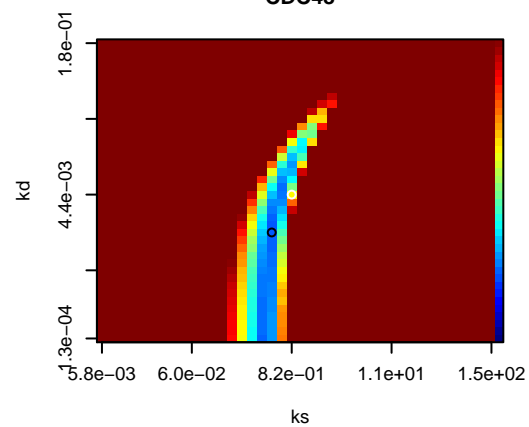**ACP1**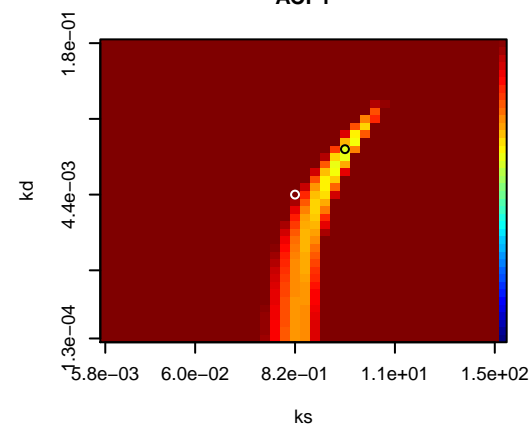**RRP4**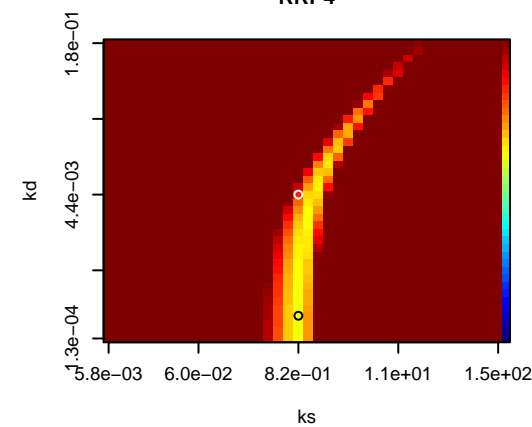

**CUE5**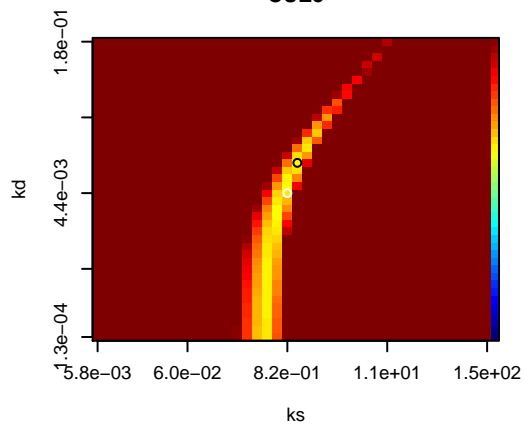**YDL124W**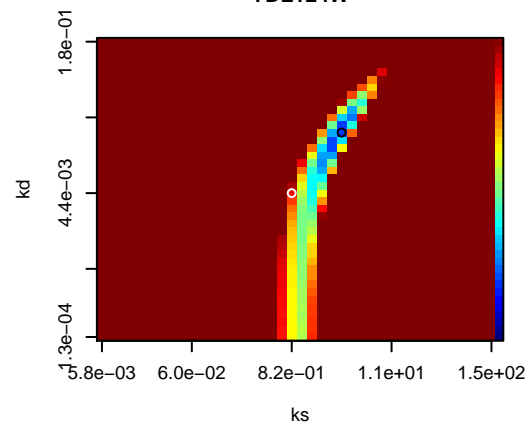**COX12**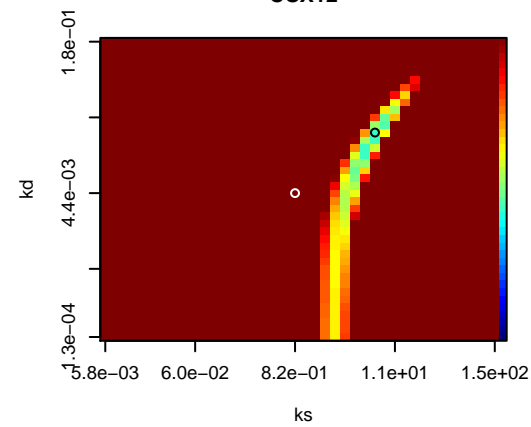**HRP1**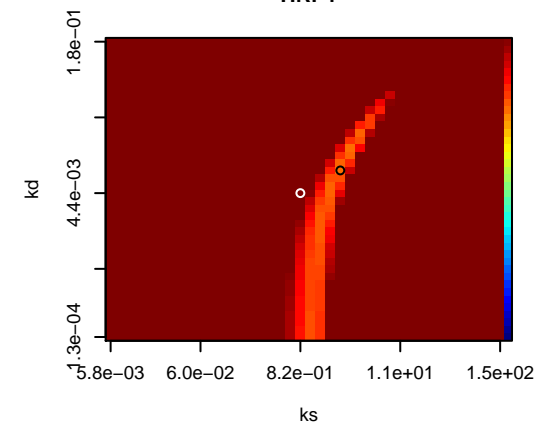**RPS1B**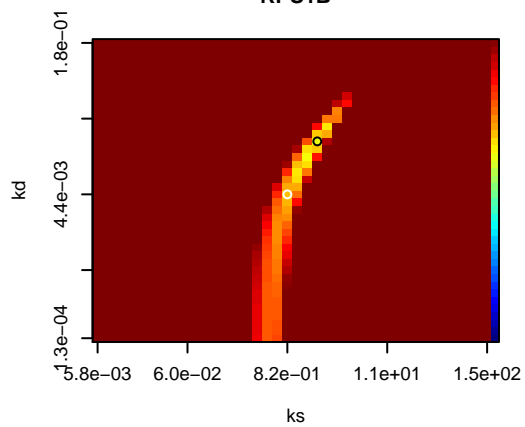**SSB1**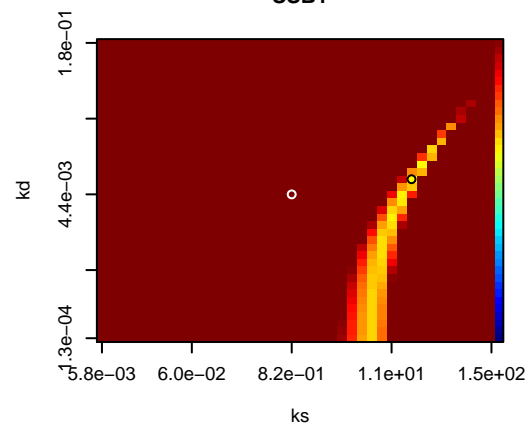**UGP1**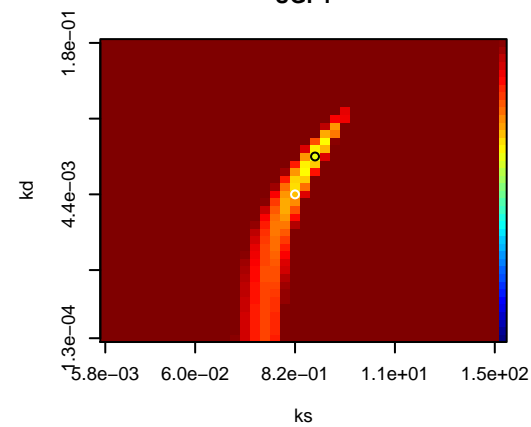**RRB1**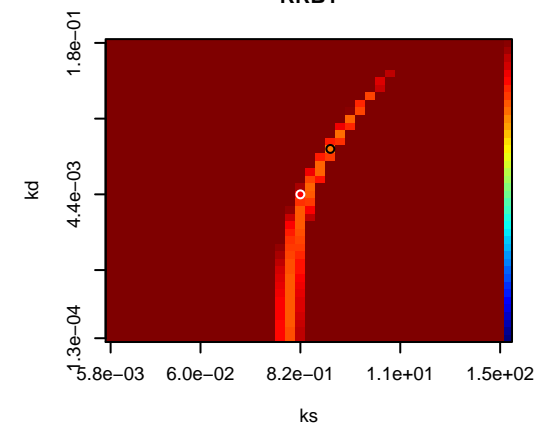**MIC17**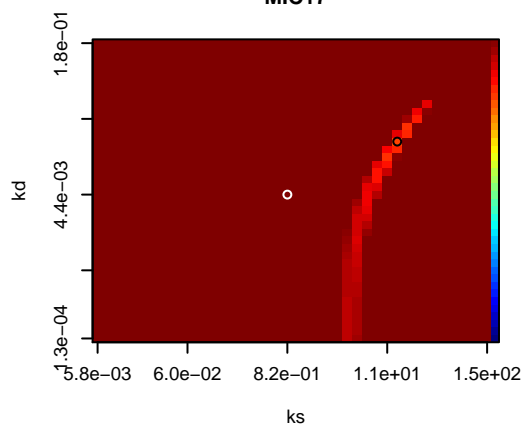**SCW4**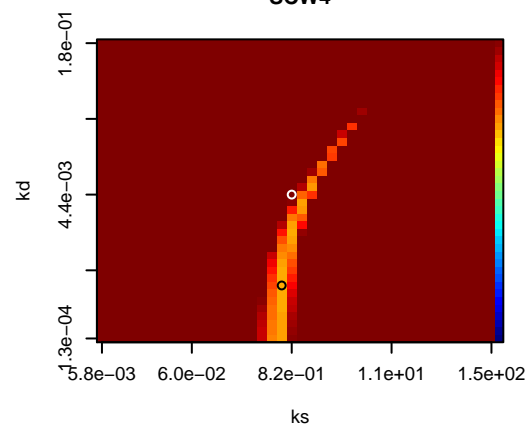**SAM4**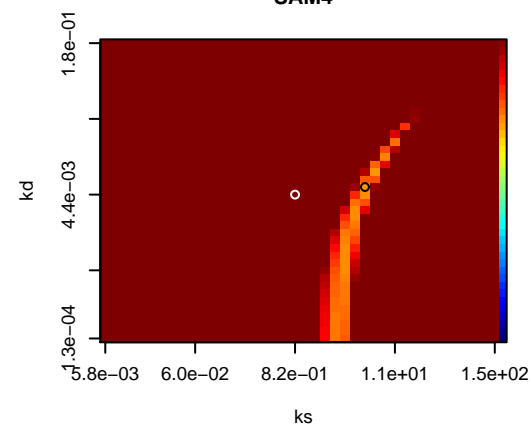**SEC17**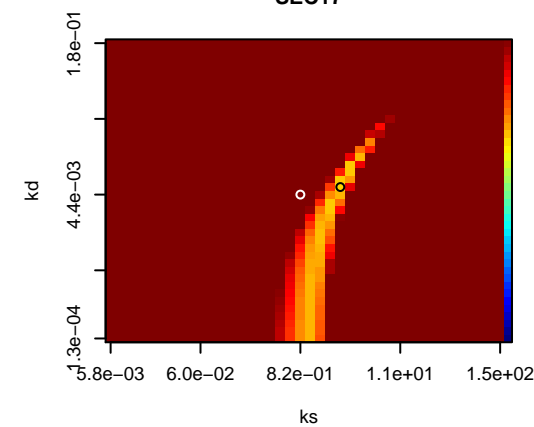

NAB2

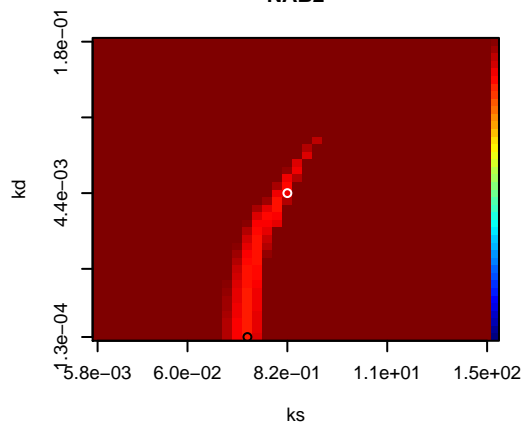

FPR1

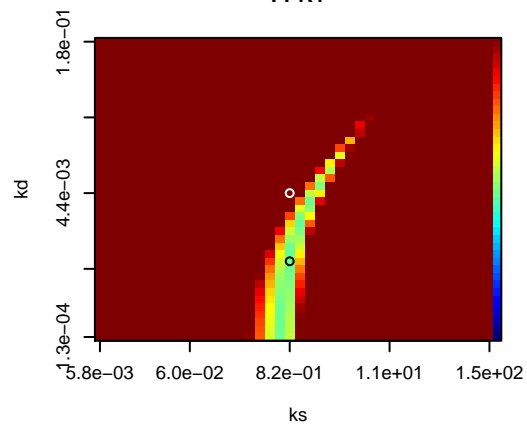

YDL086W

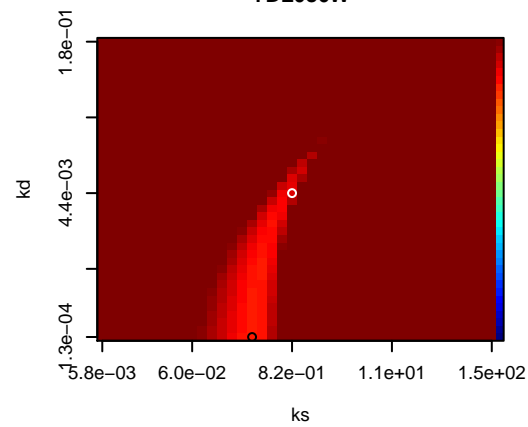

GSY2

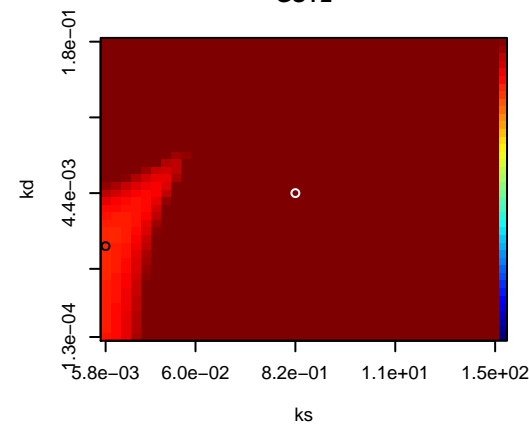

SOD2

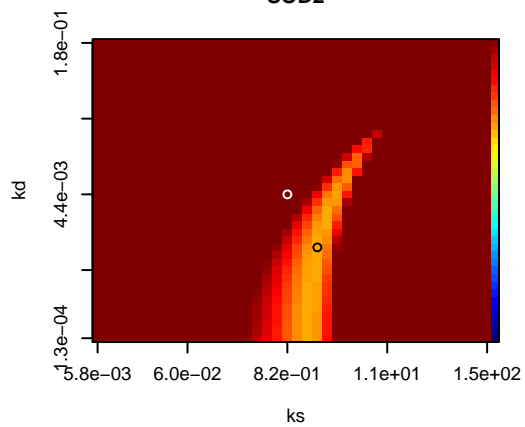

RPS1A

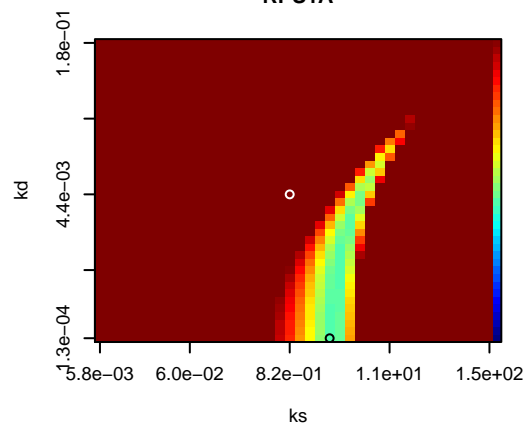

RPP0

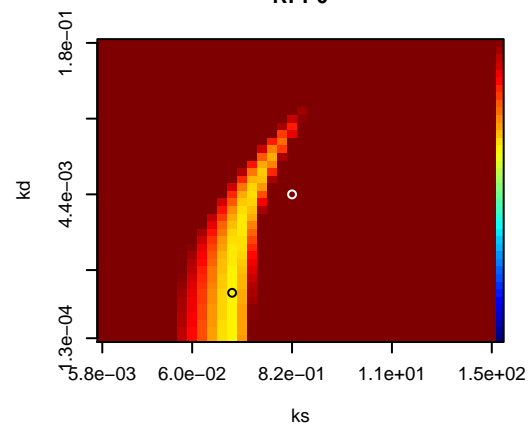

ATP15

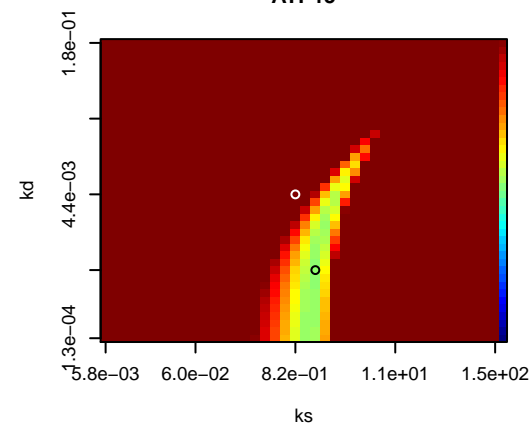

PDX3

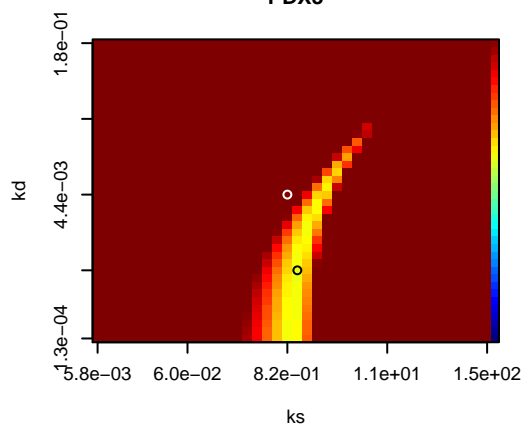

CDC37

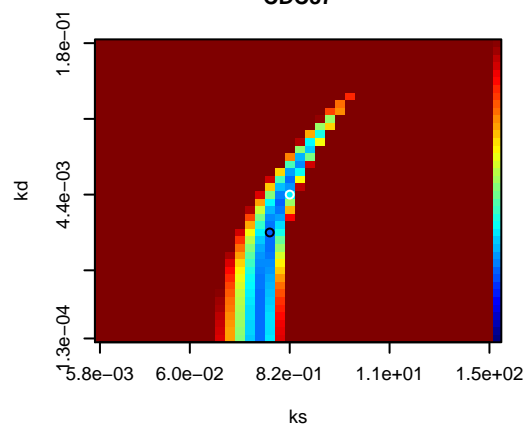

MDH1

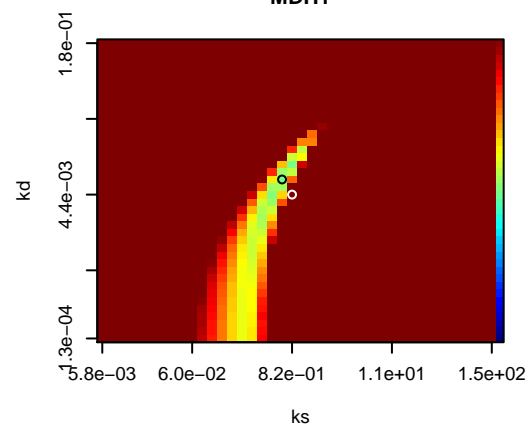

CYS3

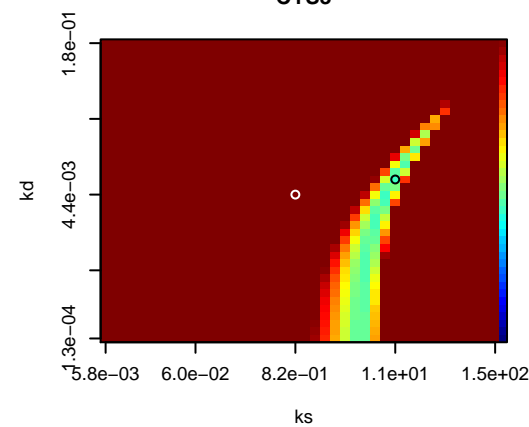

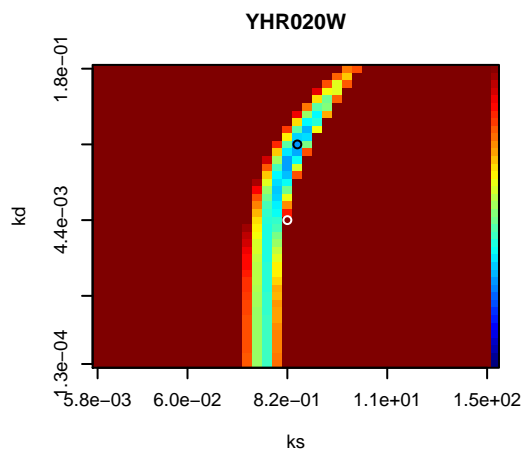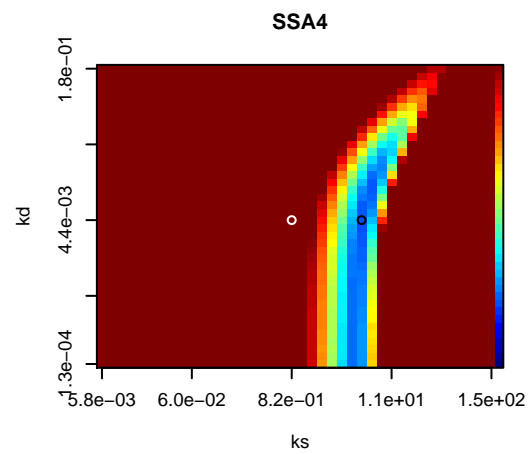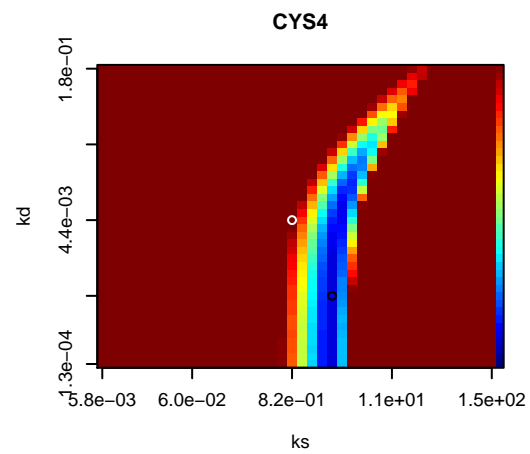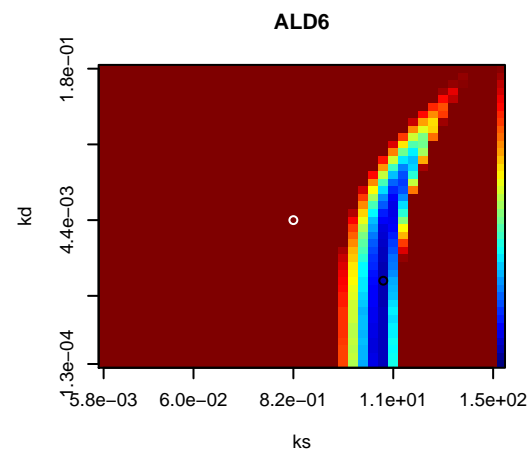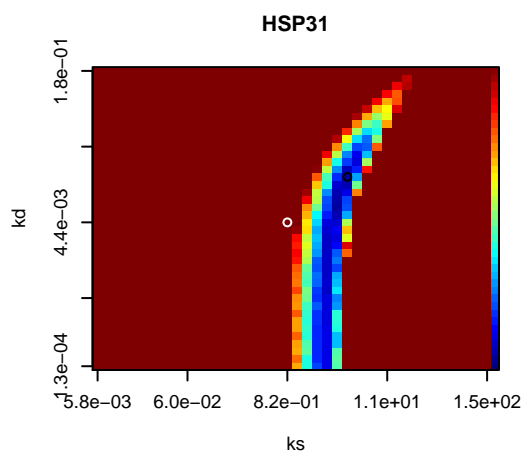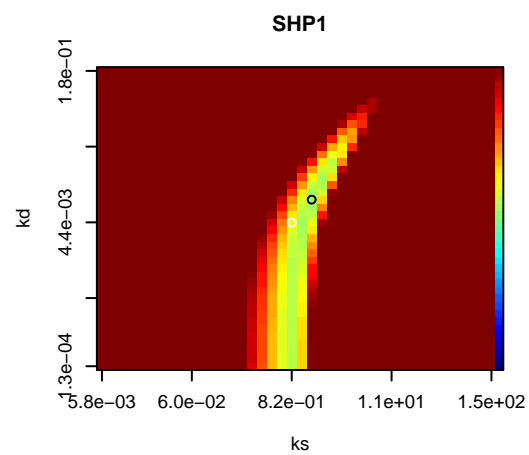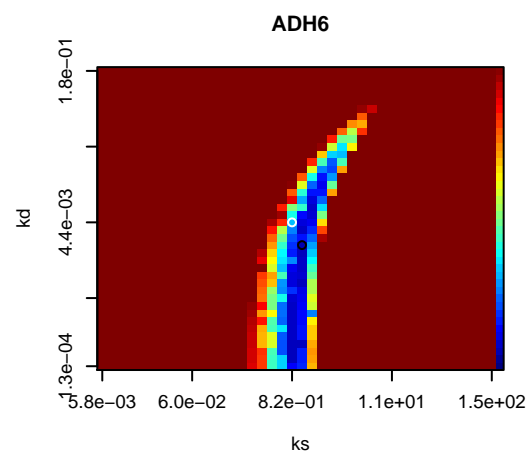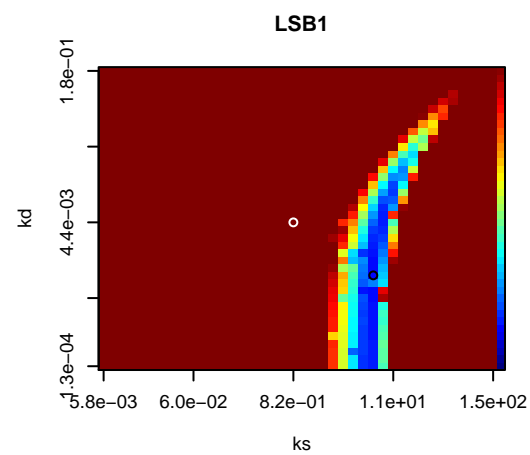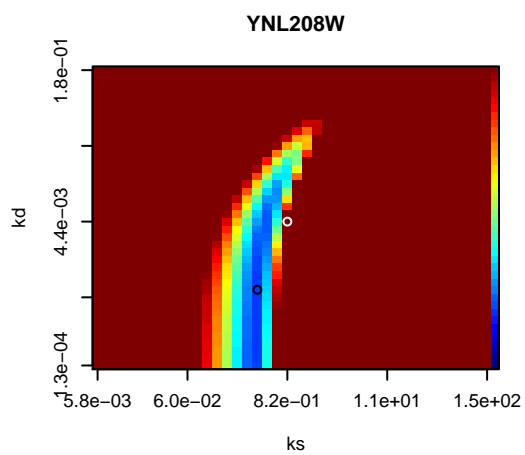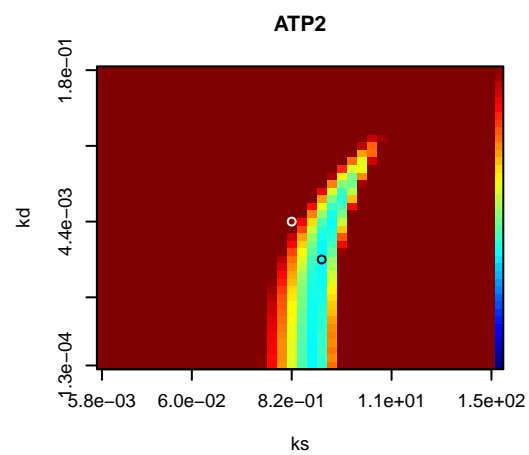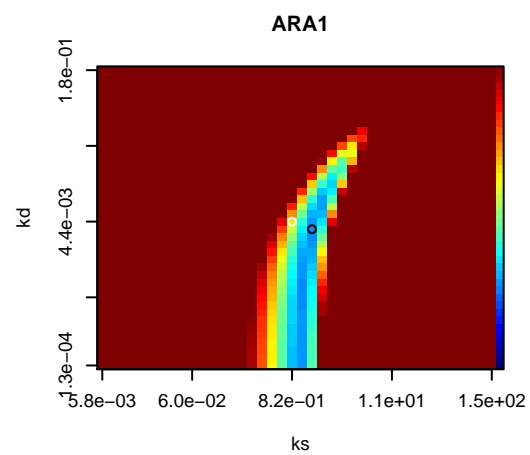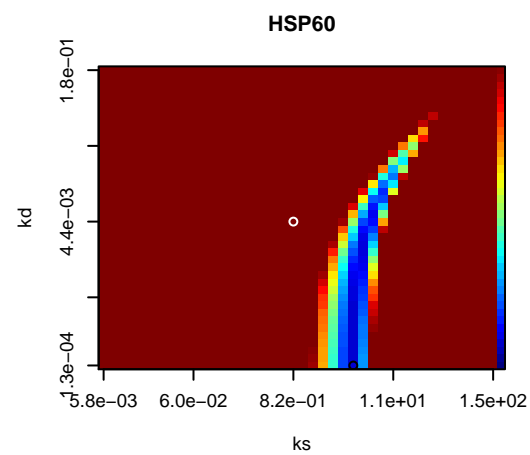

MGE1

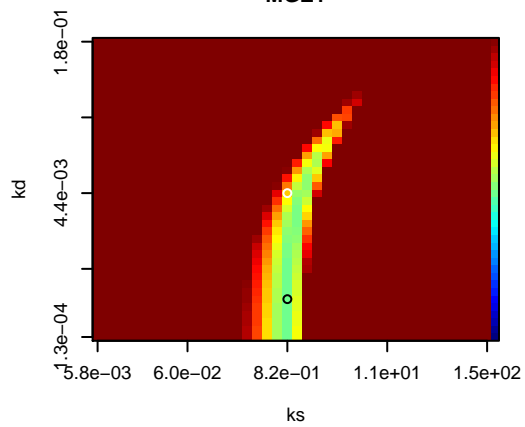

RPP2B

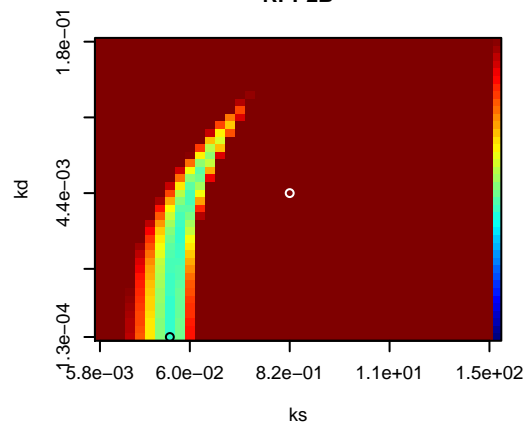

LSC1

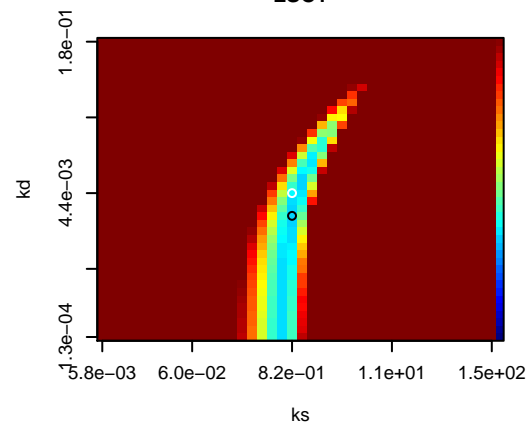

EGD1

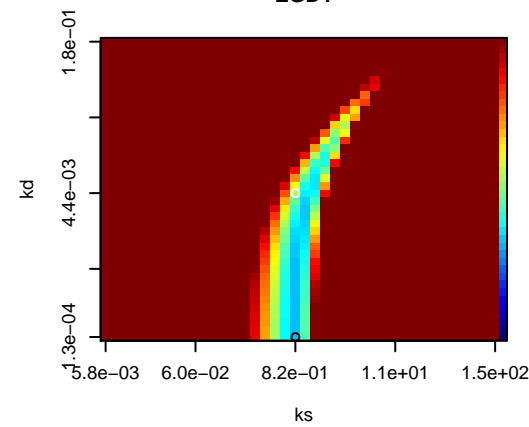

NOP58

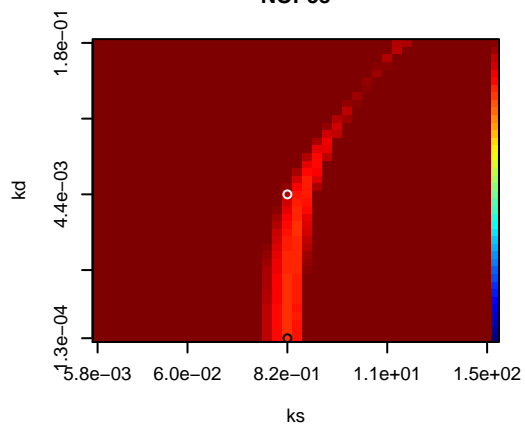

MET3

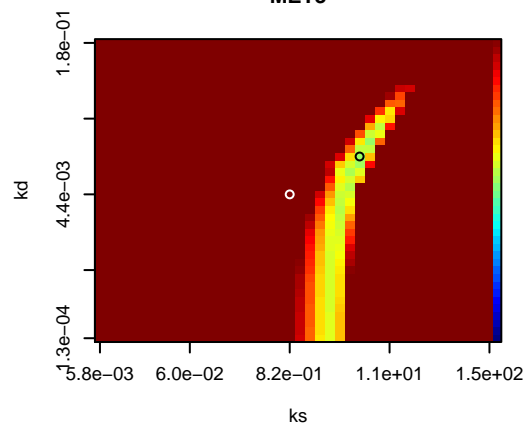

AHP1

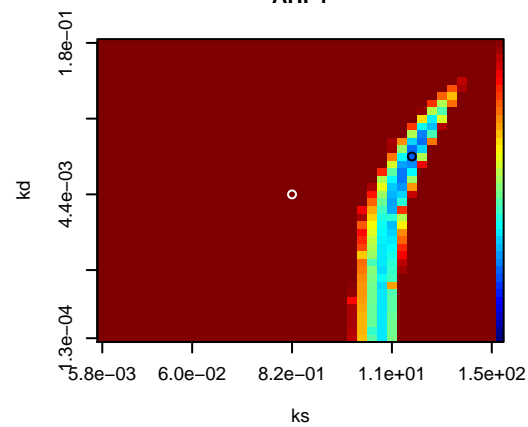

PGM2

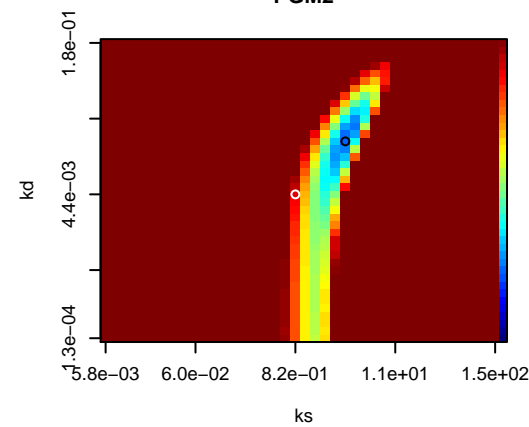

ATP1

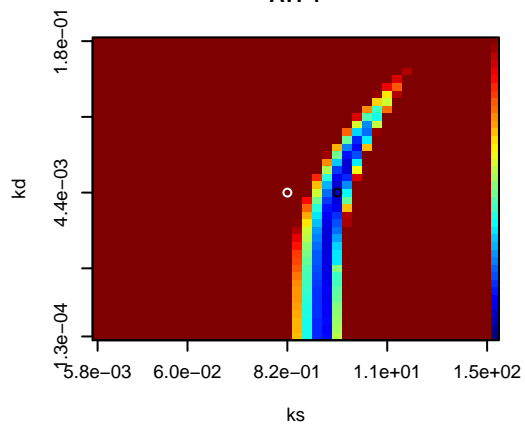

GRE3

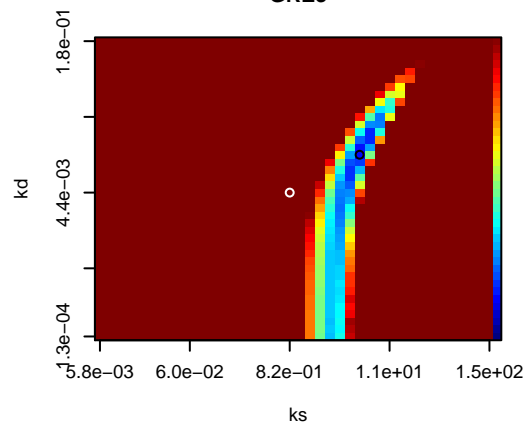

ILV2

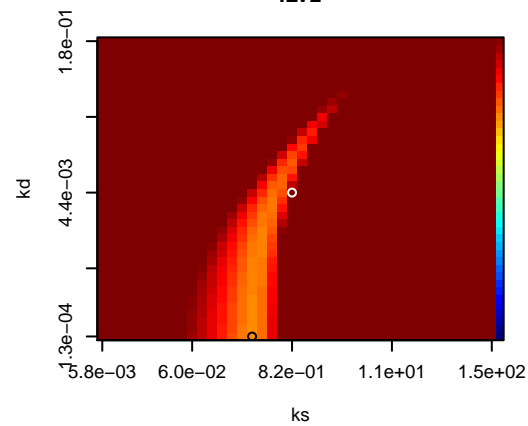

PDC1

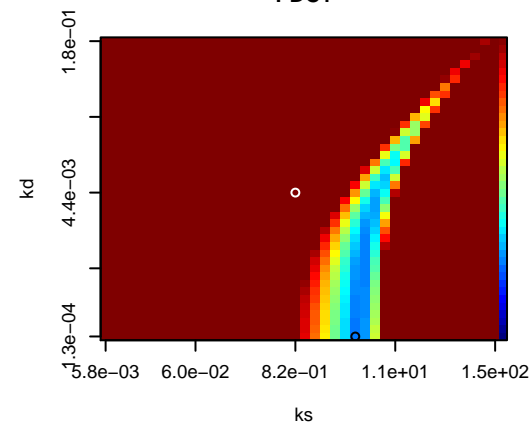

LYS4

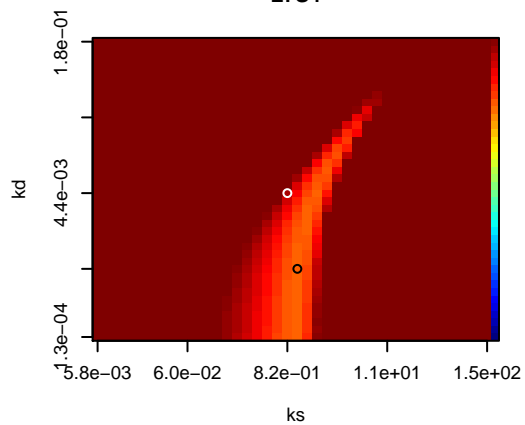

RDL1

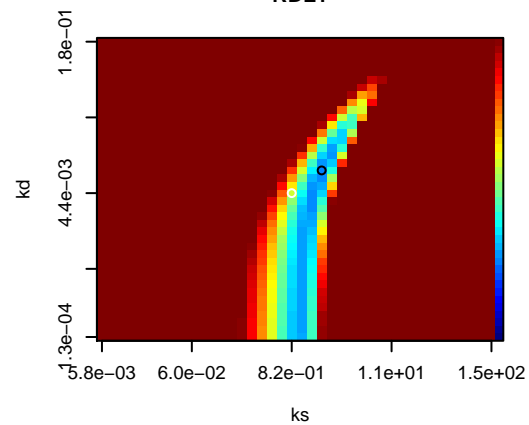

ACB1

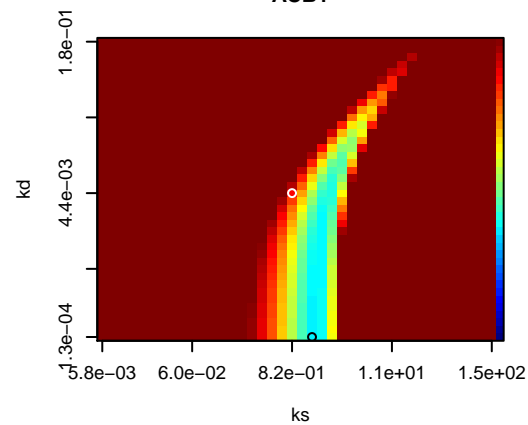

TSA1

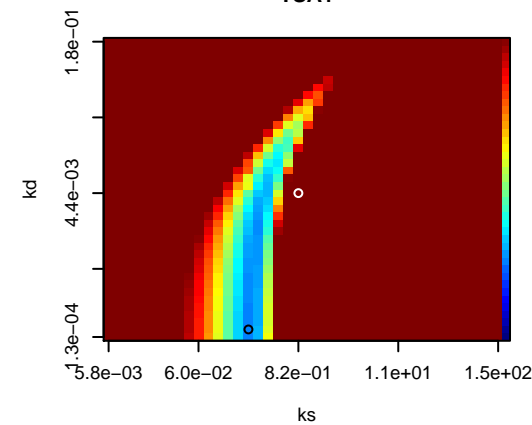

FSH1

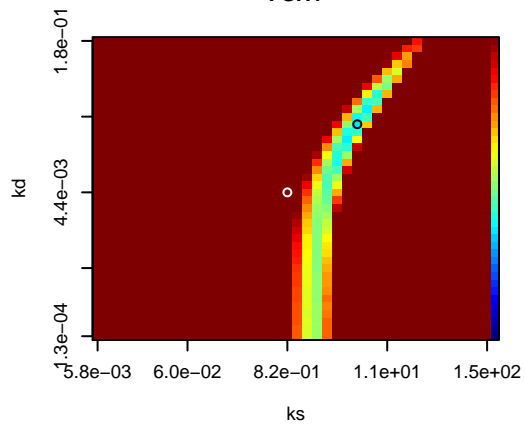

NTH1

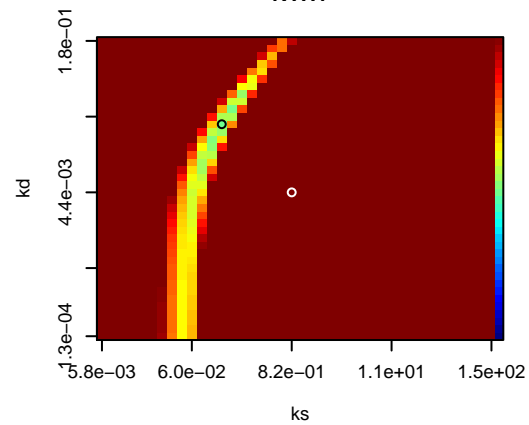

YRA1

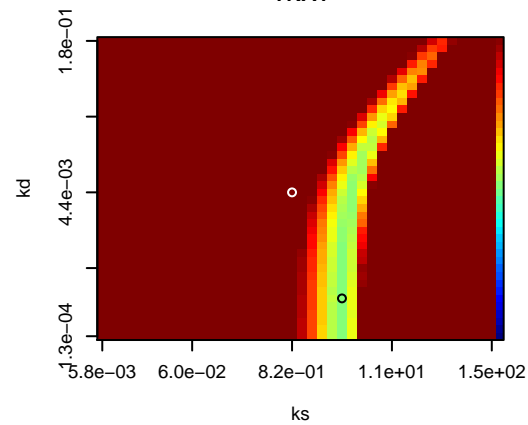

TIF3

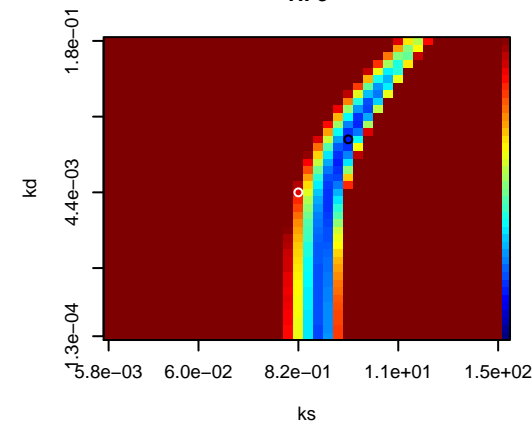

SAM2

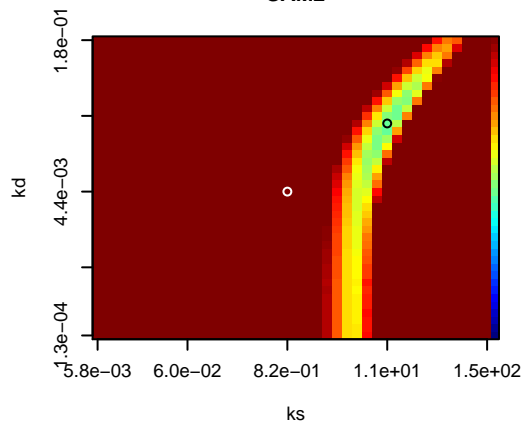

TAE2

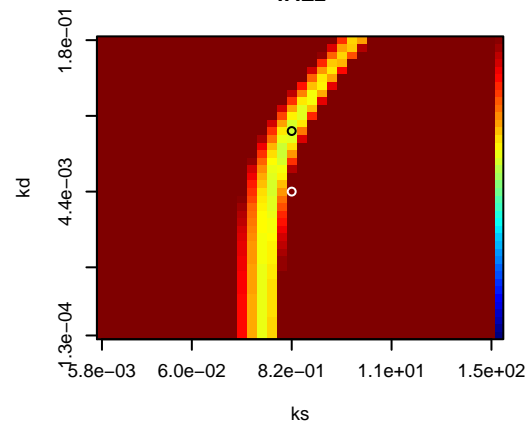

YNL134C

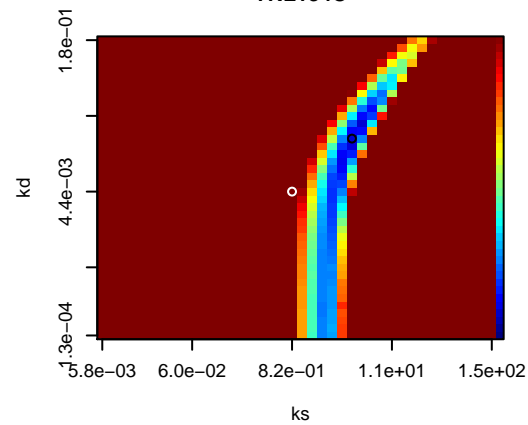

YGR130C

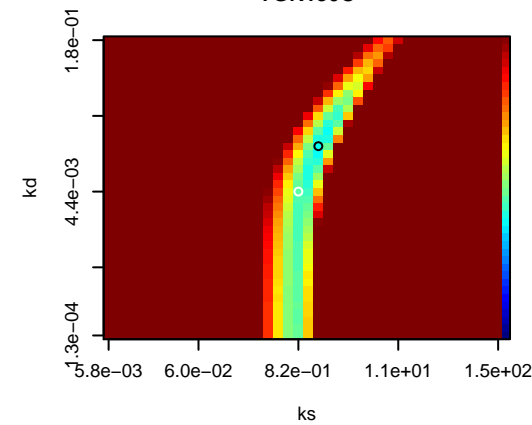

SSA1

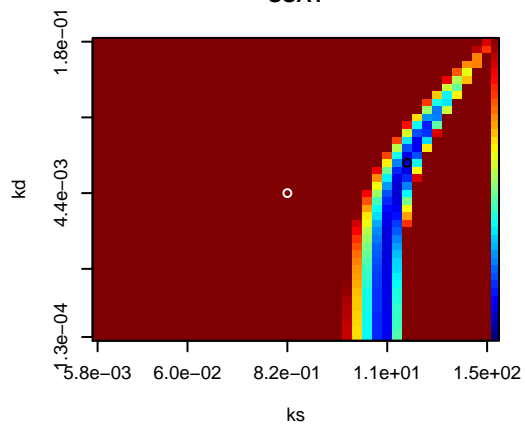

SUI1

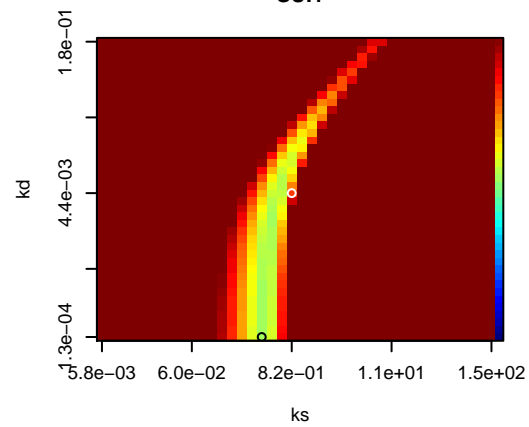

YRA2

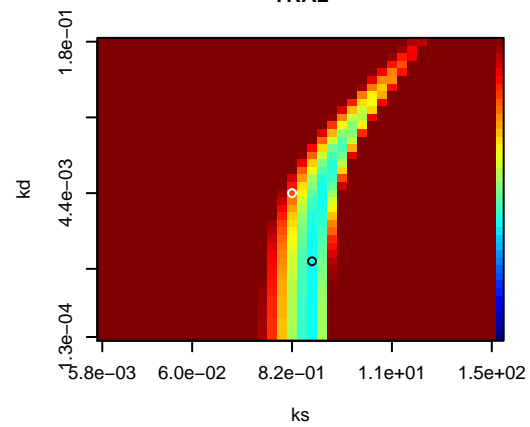

ACT1

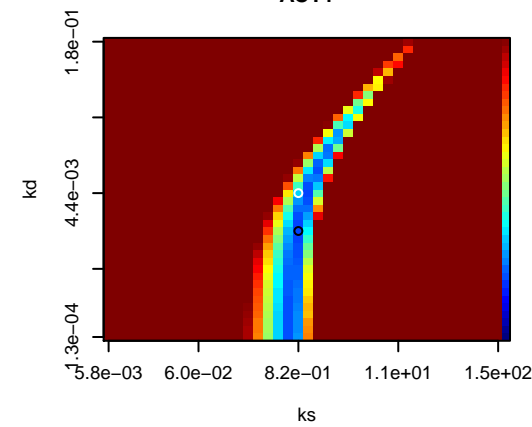

YRB1

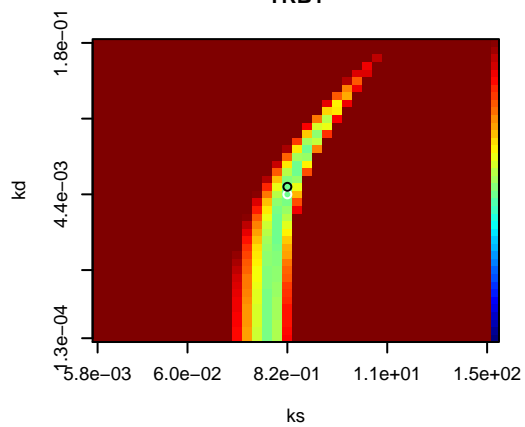

GLY1

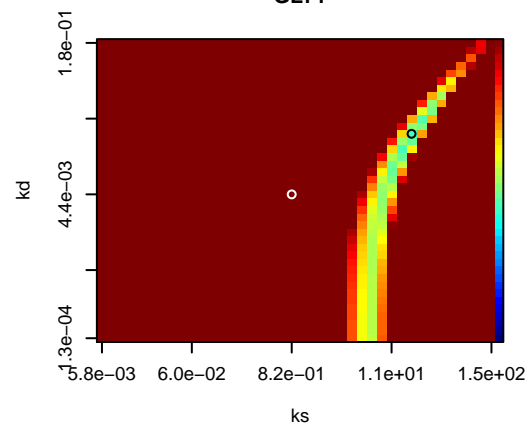

NTF2

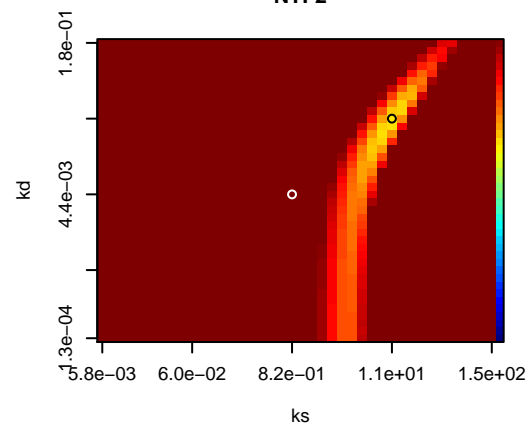

SSA2

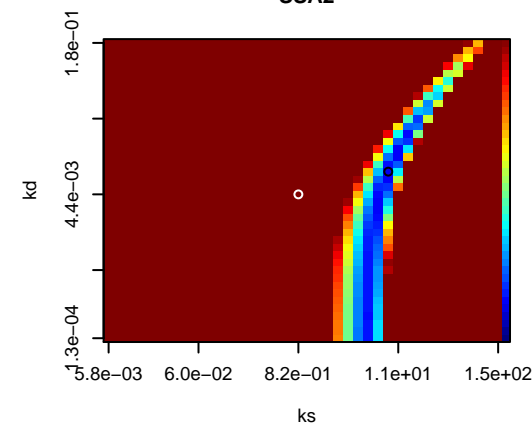

LAP4

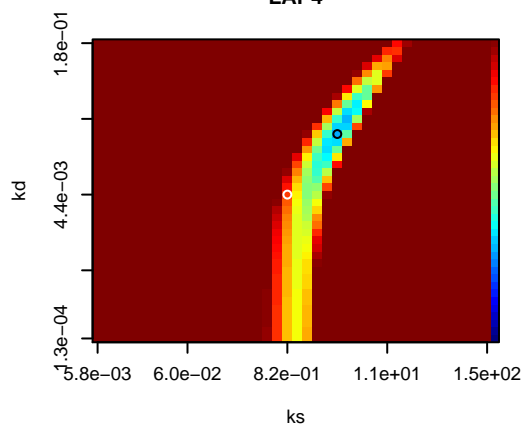

Supplement: c4mb00358f2.zip [file c4mb00358f2.zip]
