# Supplementary material for: One third of dynamic protein expression profiles can be predicted by a simple rate equation
Source: Royal Society of Chemistry journal article supplement (doi:10.1039/c4mb00358f), 2014-08-01

ENO2

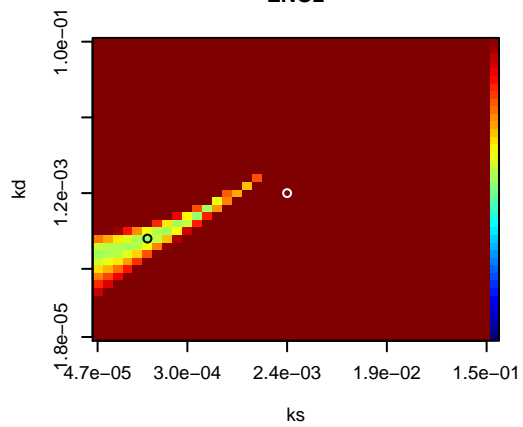

RPP2B

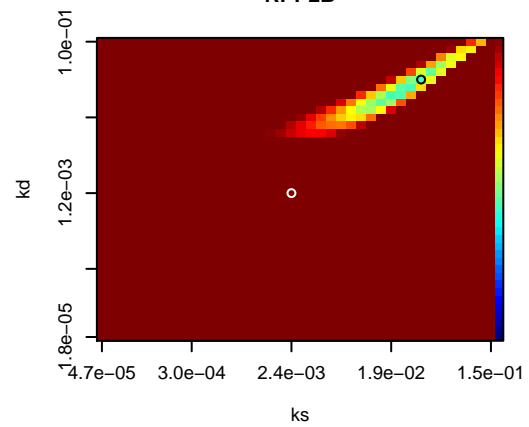

EGD1

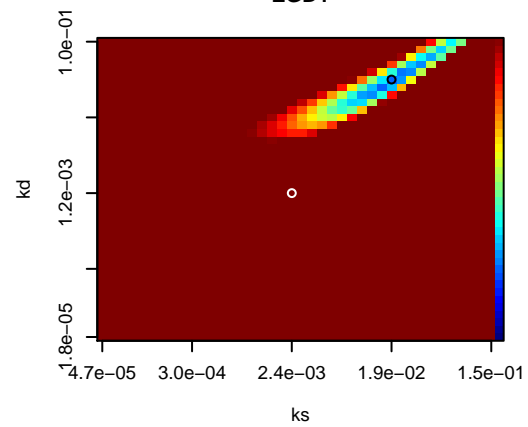

TY1B-ER2

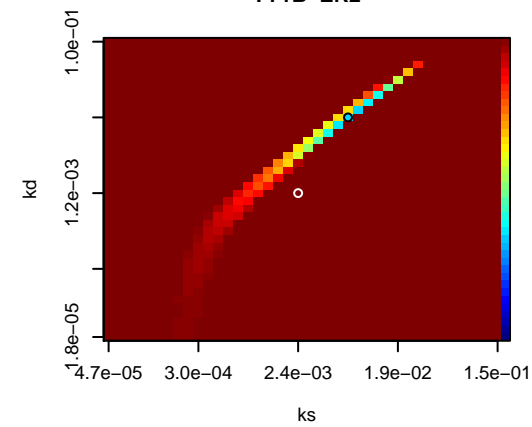

TY1B-GR1

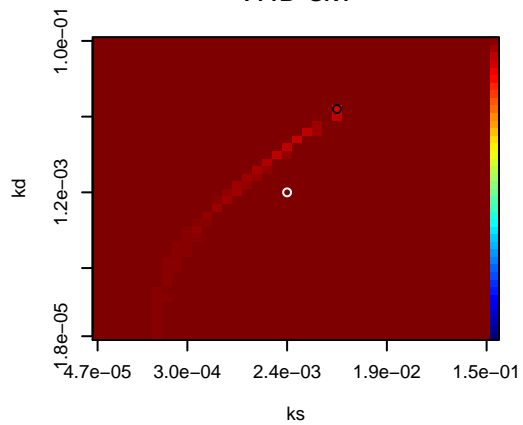

FAA1

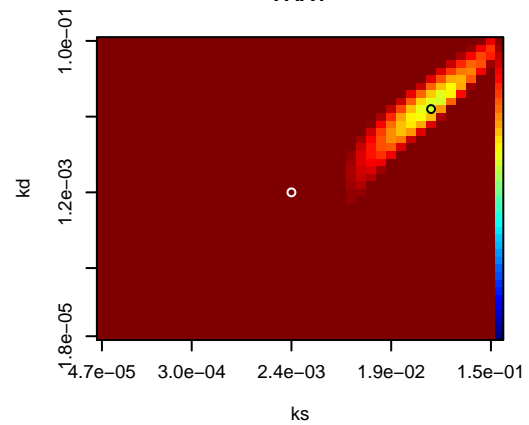

RPL9A

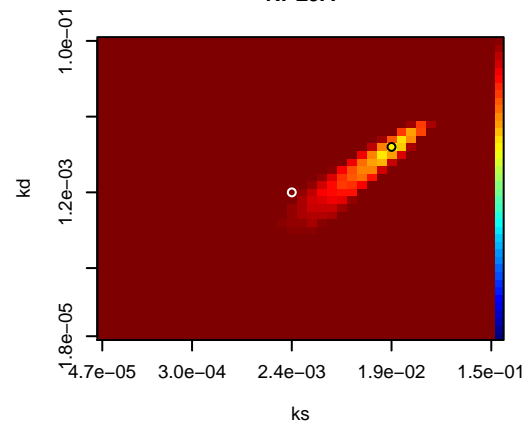

RPS9B

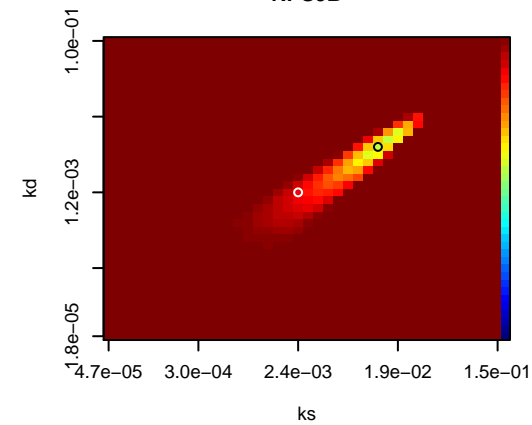

SAC6

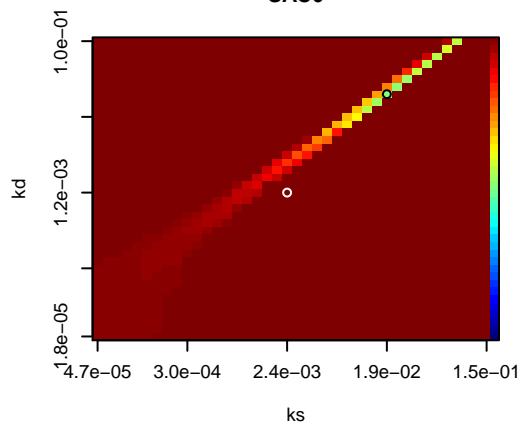

RPS7A

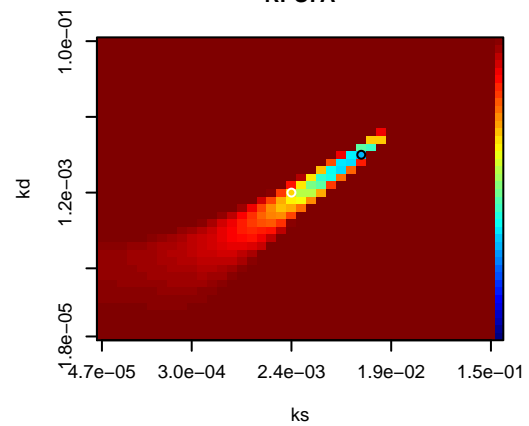

PRP43

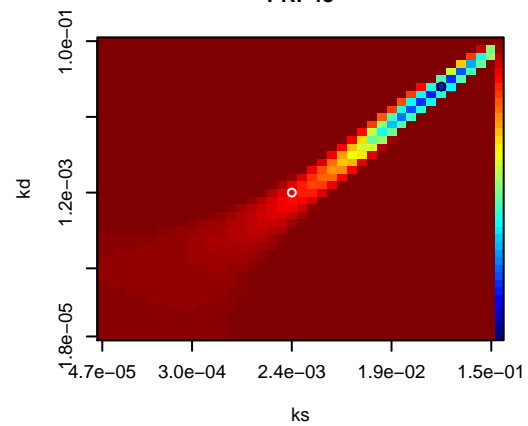

GLN1

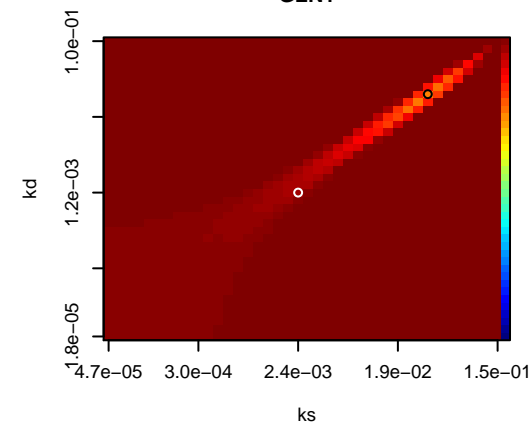

GCD11

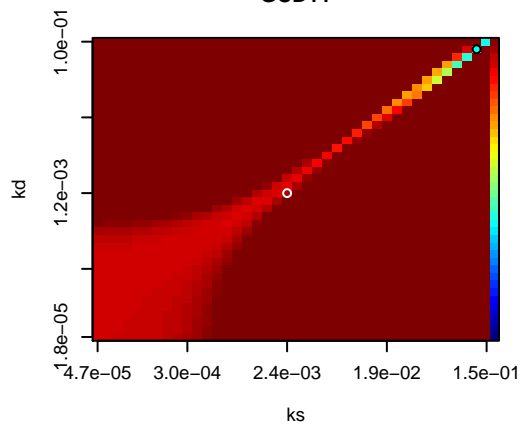

SER1

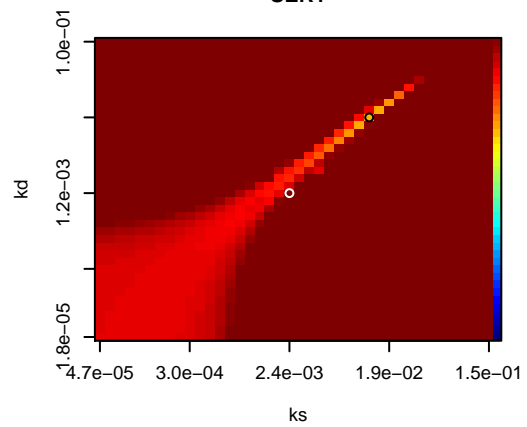

GFA1

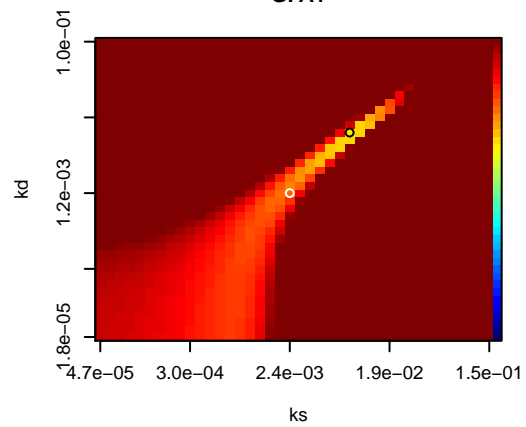

QCR2

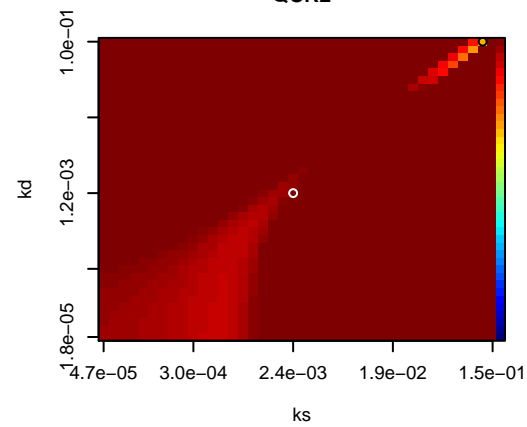

GSY2

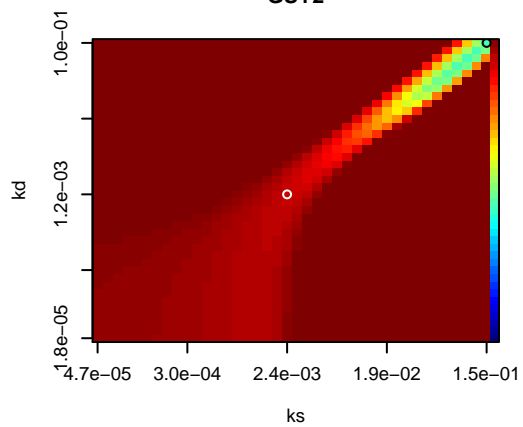

TY1B-ER1

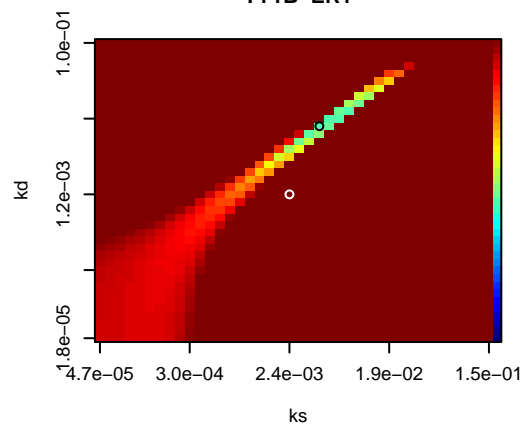

GUA1

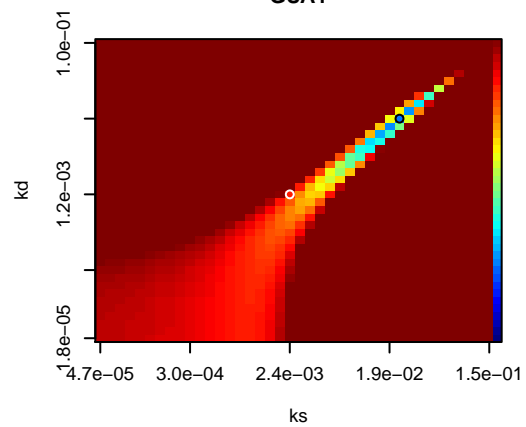

TY1B-DR6

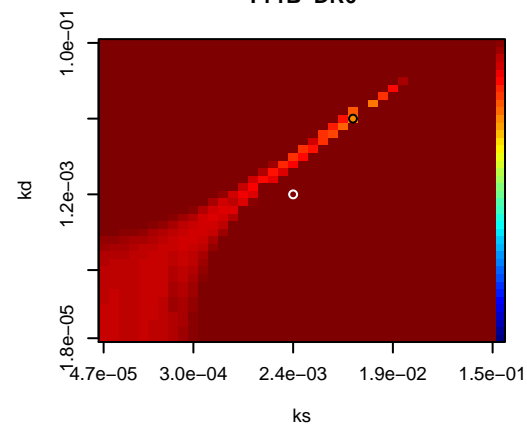

TY1B-DR1

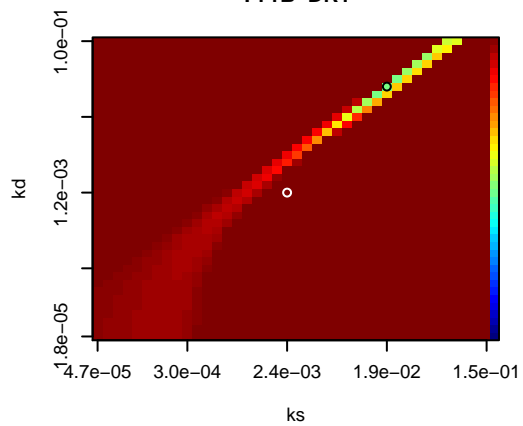

LYS21

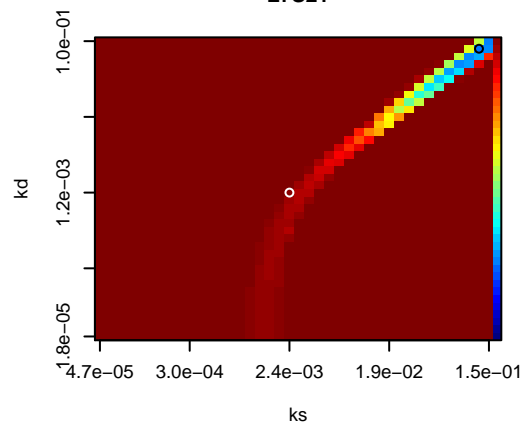

GLC7

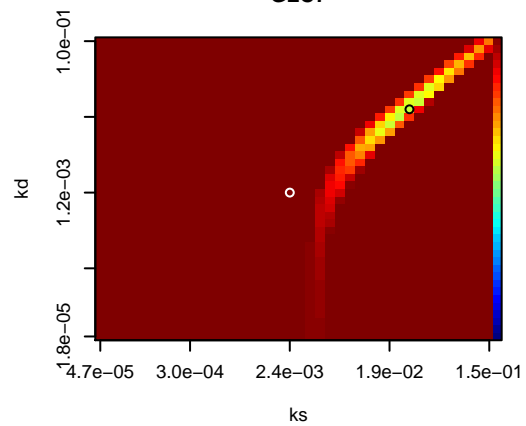

TY1A-DR6

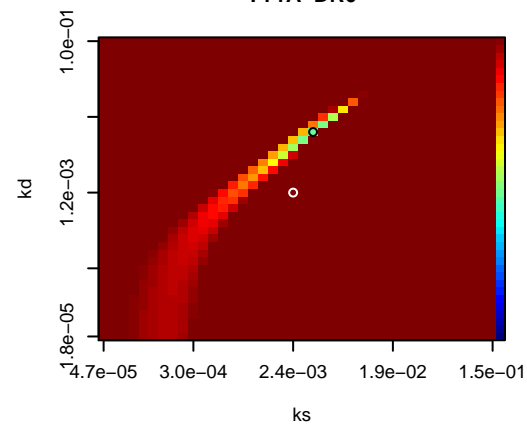

Supplement: c4mb00358f2.zip [file c4mb00358f2.zip]
