# Supplementary material for: One third of dynamic protein expression profiles can be predicted by a simple rate equation
Source: Royal Society of Chemistry journal article supplement (doi:10.1039/c4mb00358f), 2014-08-01

ABP1

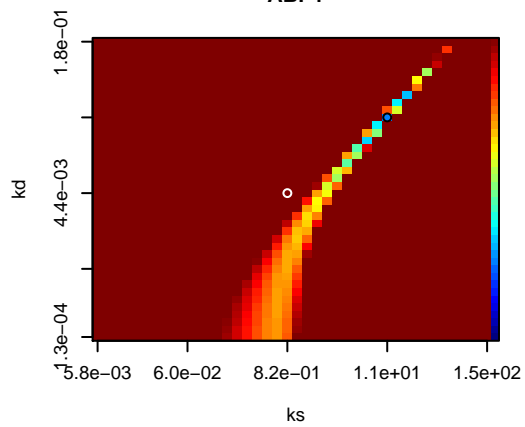

SBP1

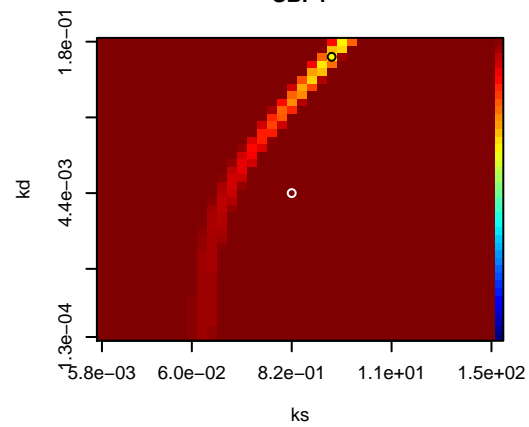

MEC1

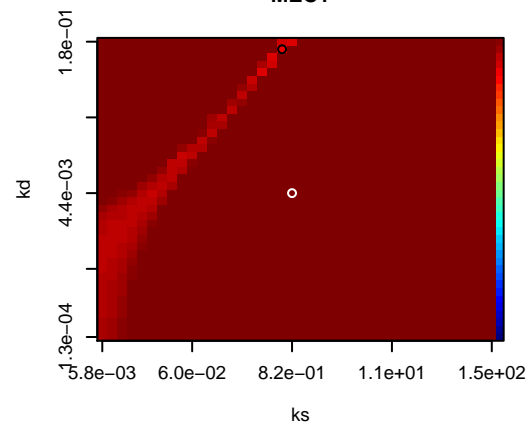

PUP2

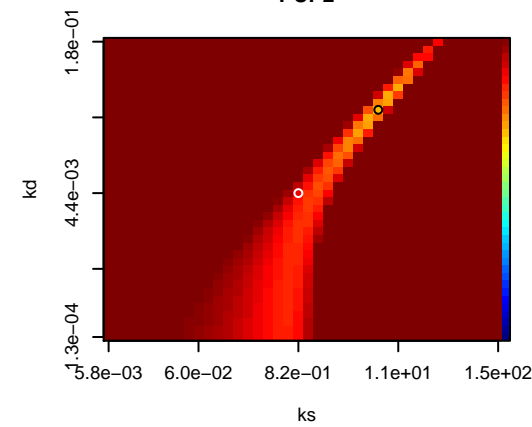

DYN1

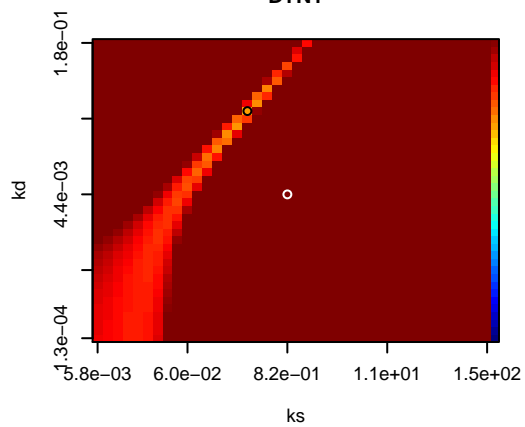

TIM10

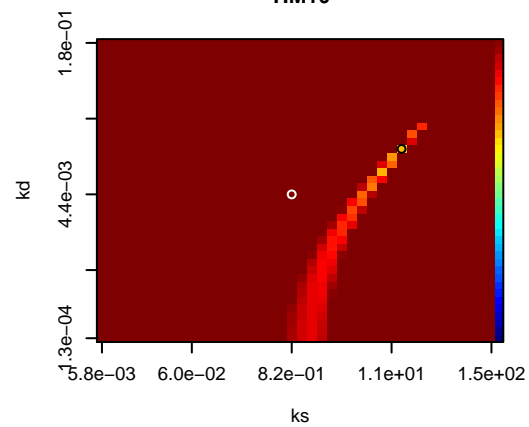

PDC5

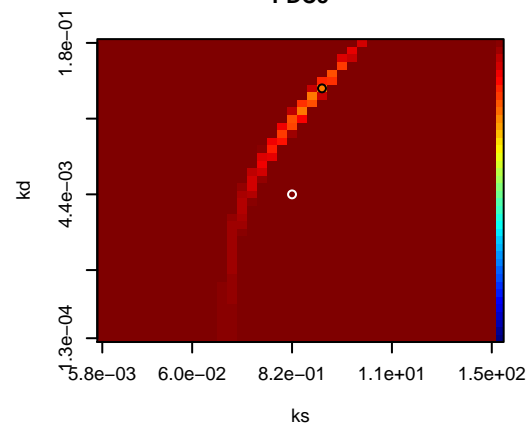

COF1

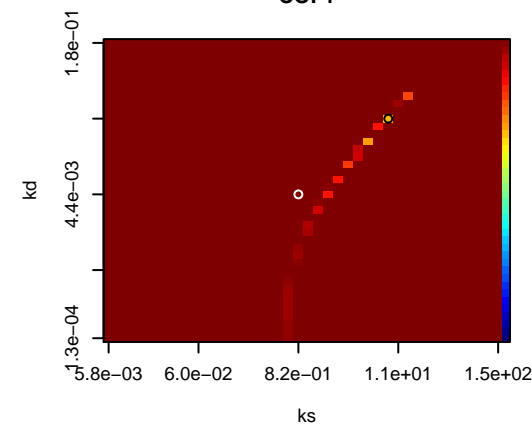

PFY1

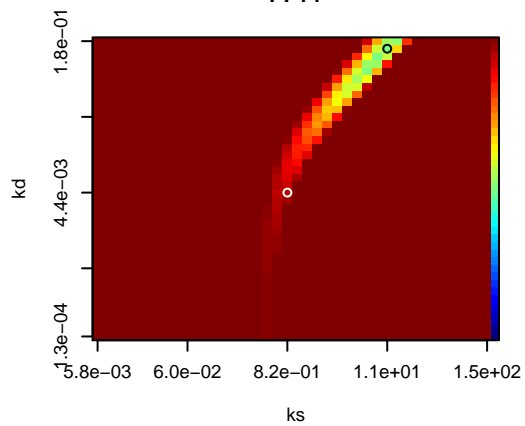

UFD4

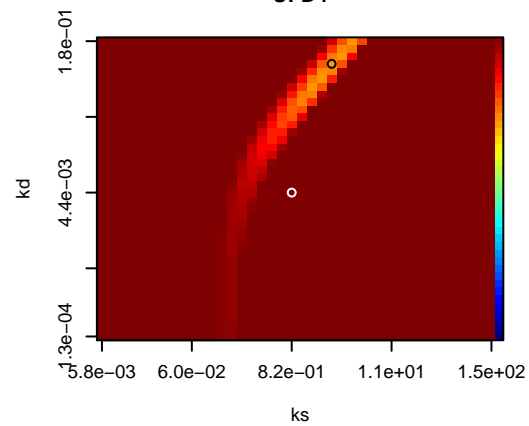

KAR2

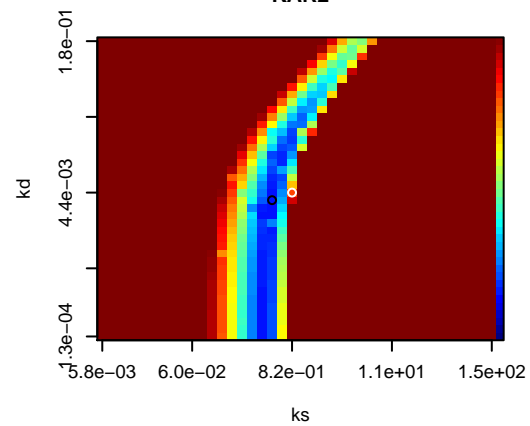

ERB1

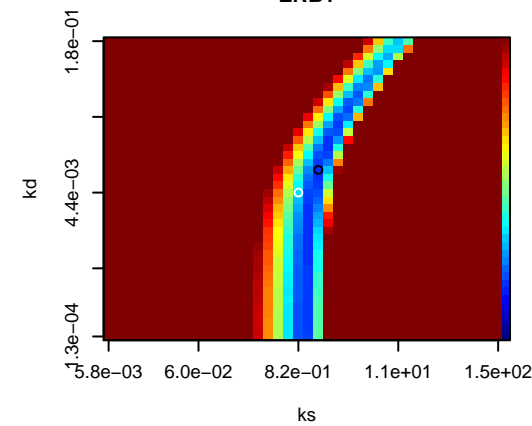

ADE16

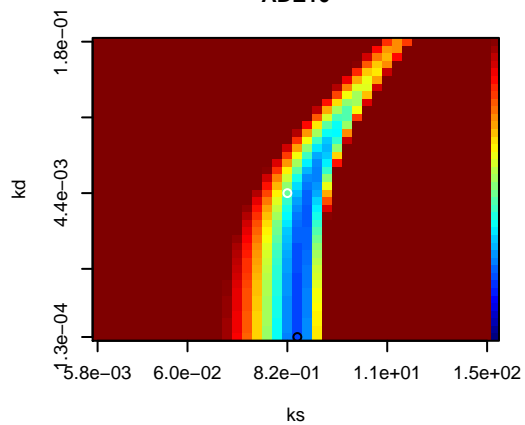

PYC1

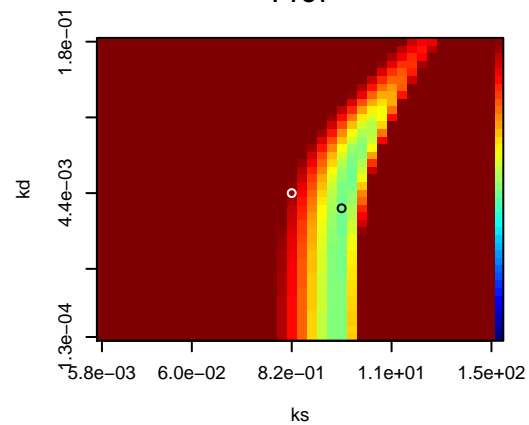

YFR06W

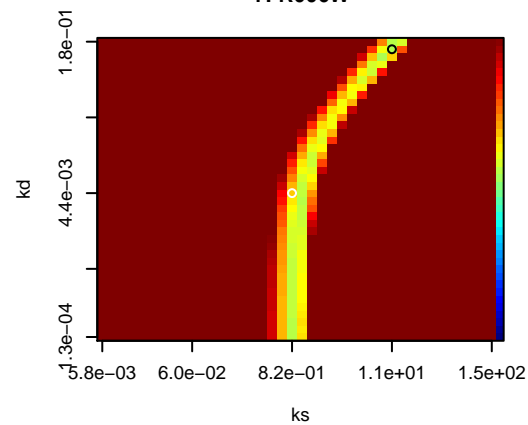

OLA1

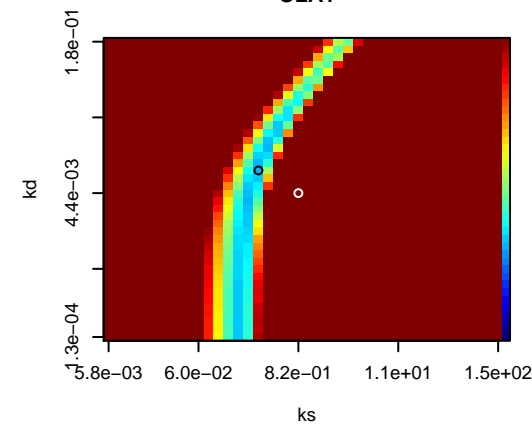

FAS1

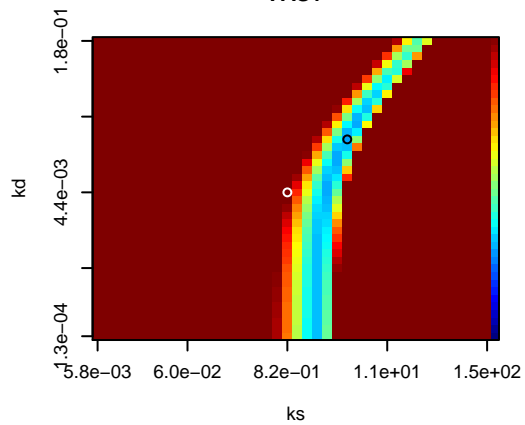

NUP2

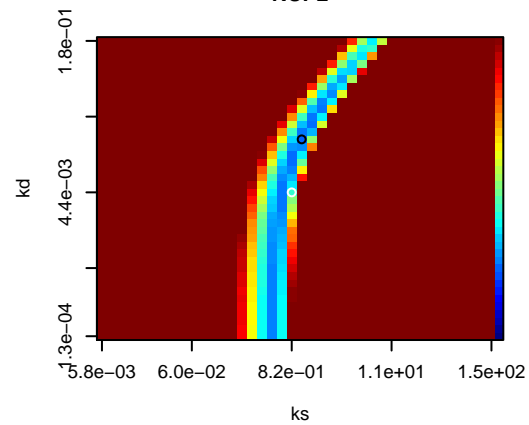

FAS2

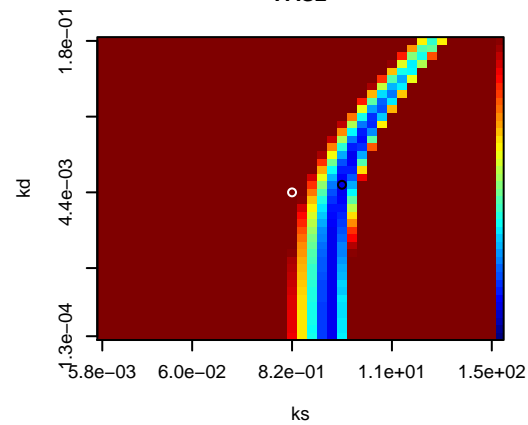

PMD1

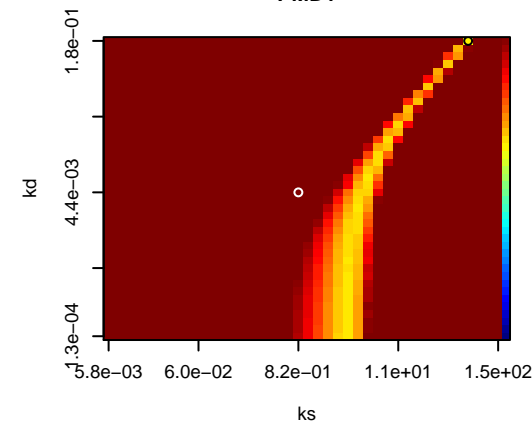

FPR3

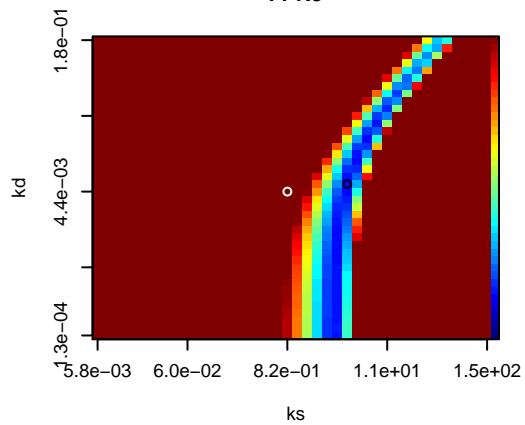

HTS1

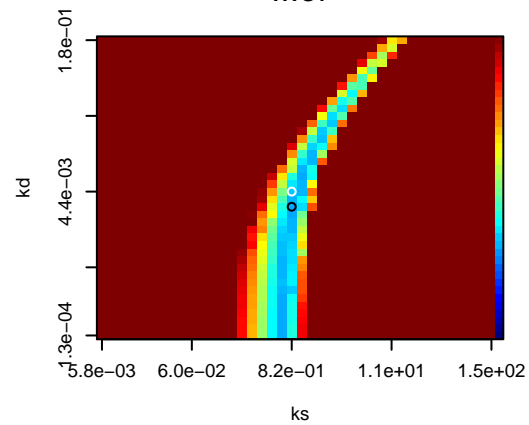

SFA1

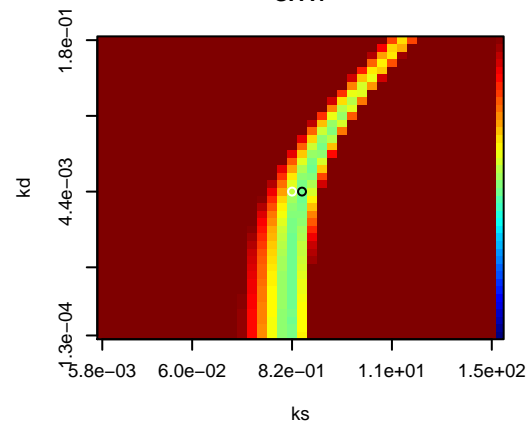

TRM1

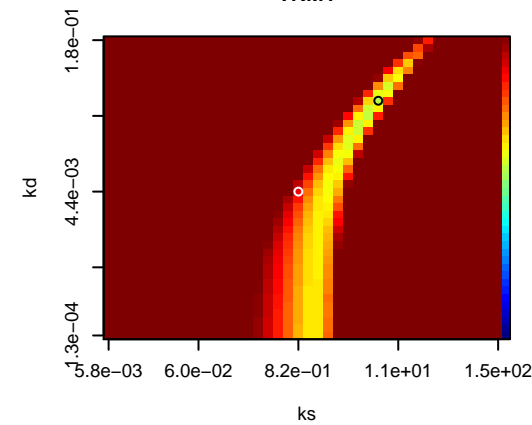

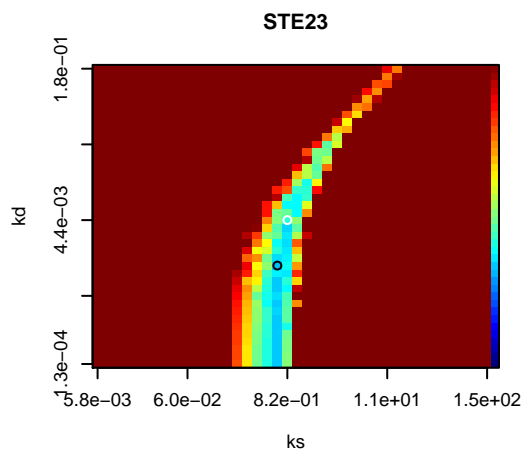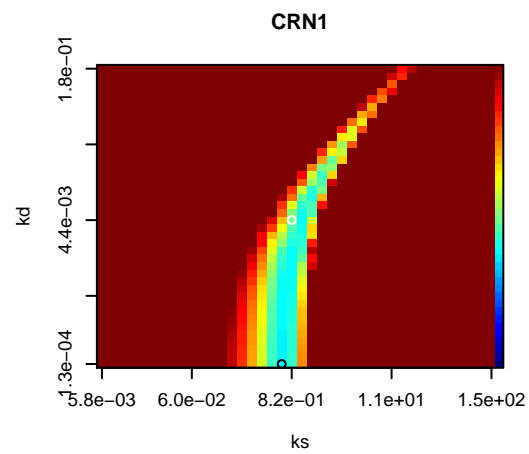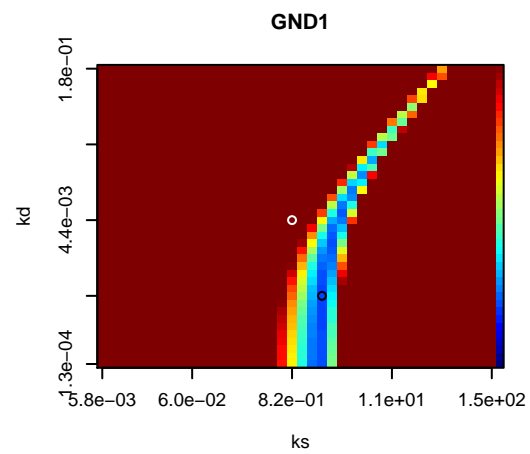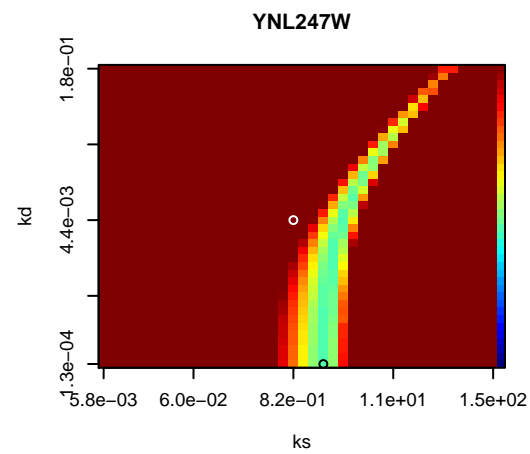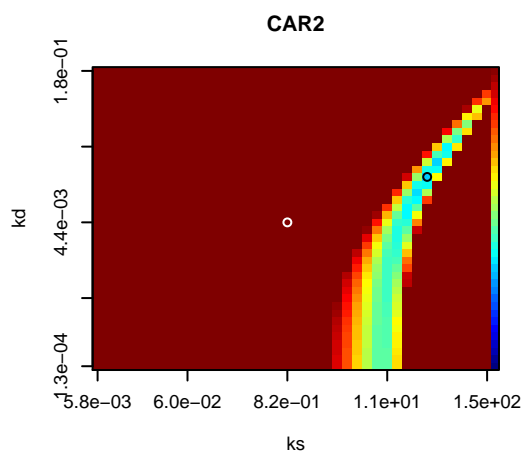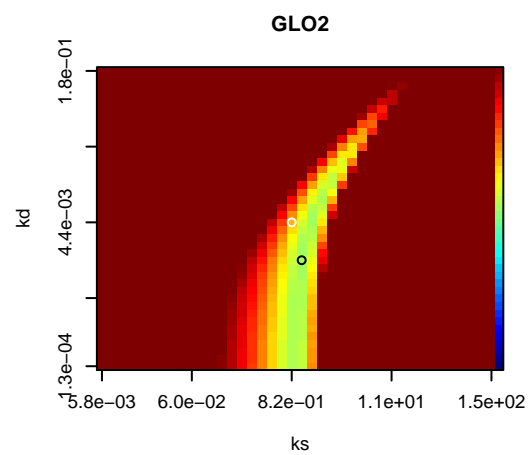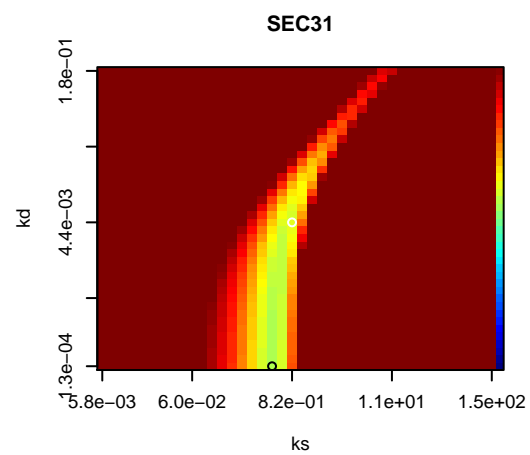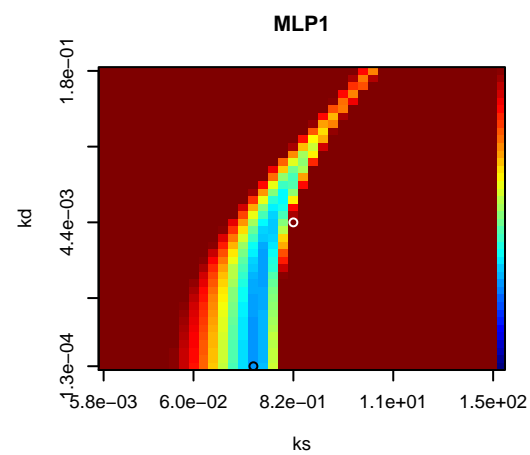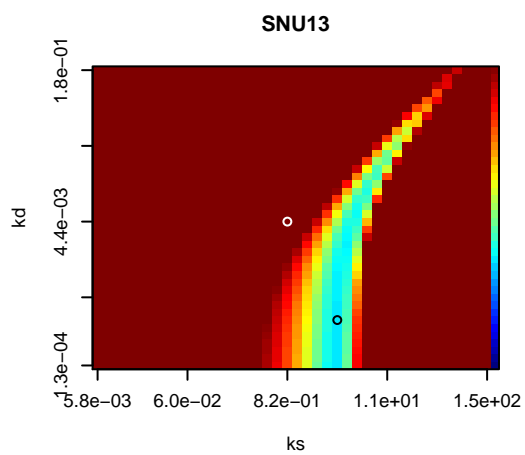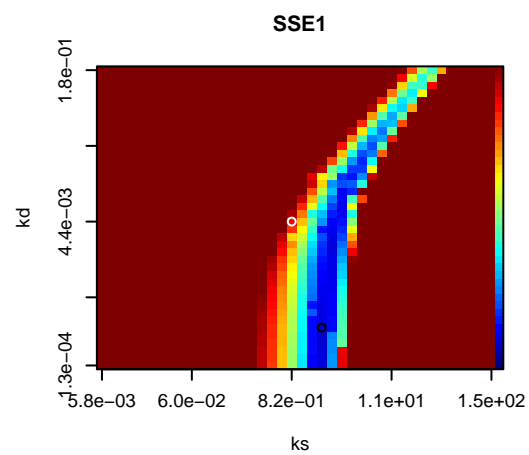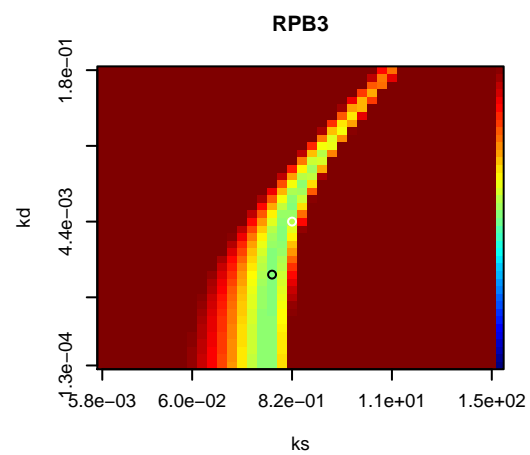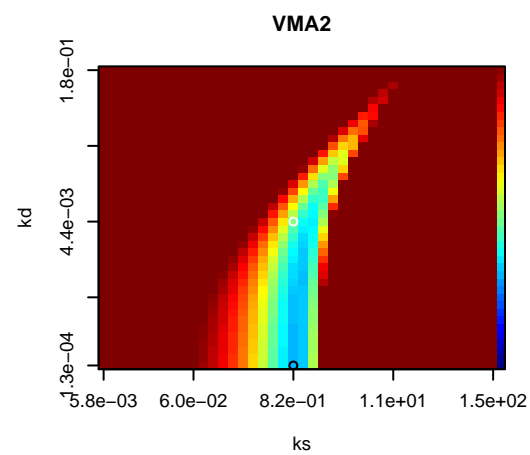

ADH3

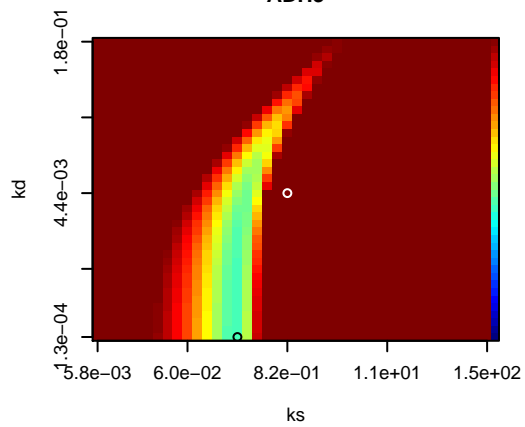

TAL1

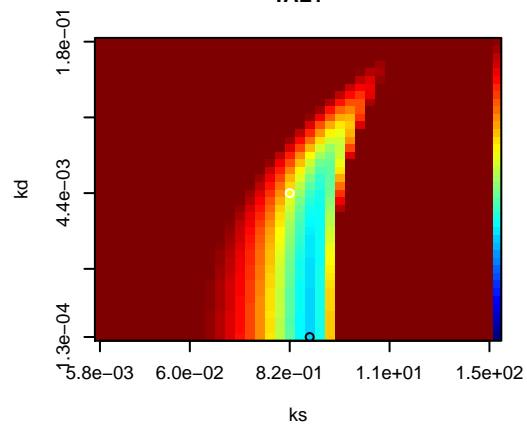

RPL12B

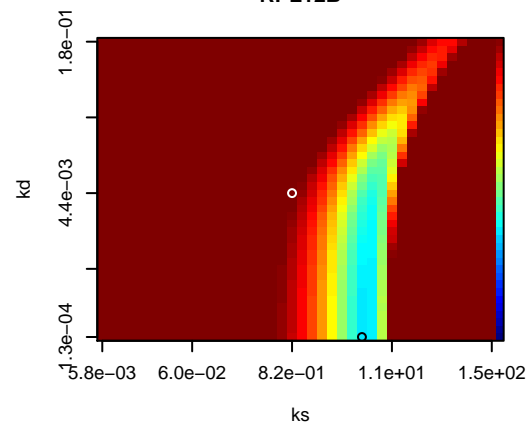

DED1

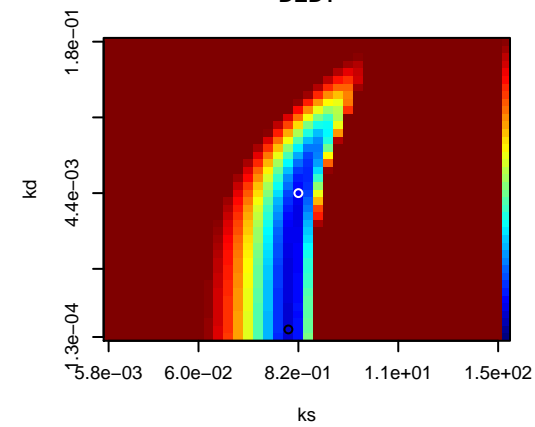

ARO2

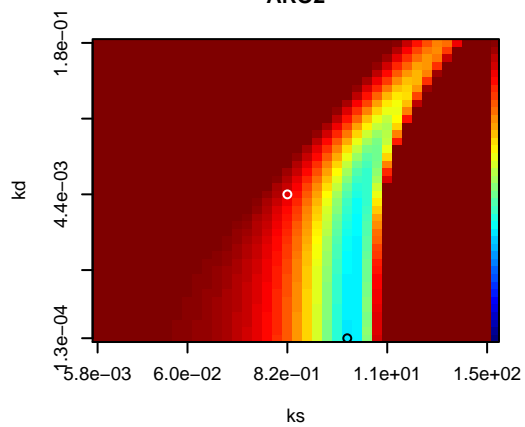

SAM1

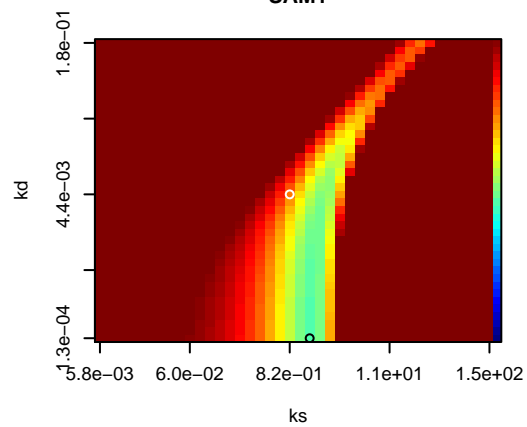

RPS26B

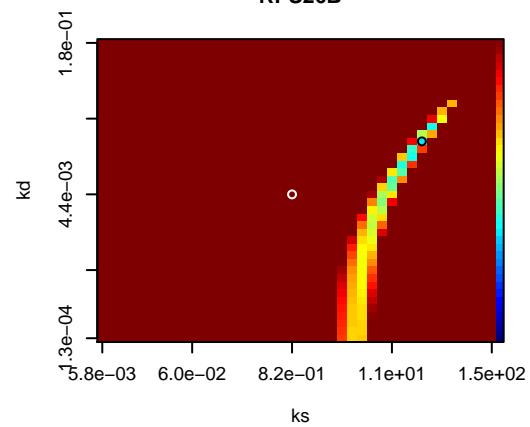

FBA1

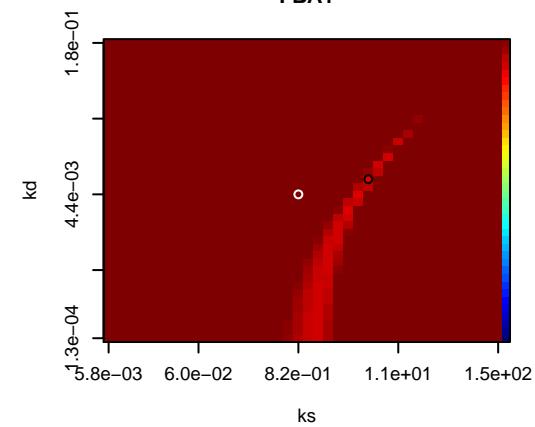

TRR1

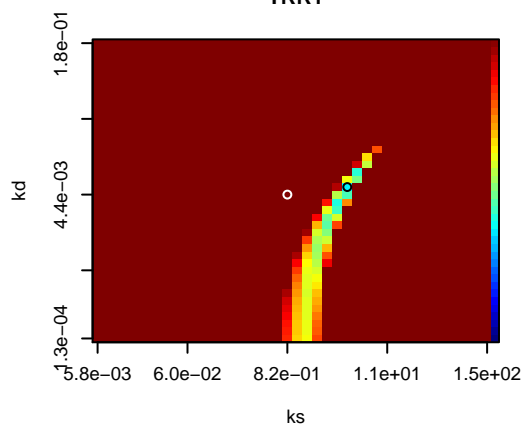

PGK1

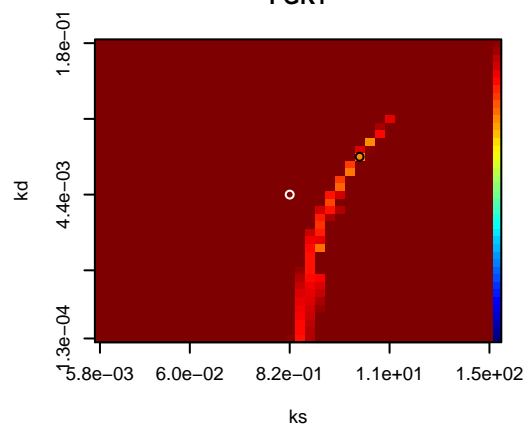

RPL10

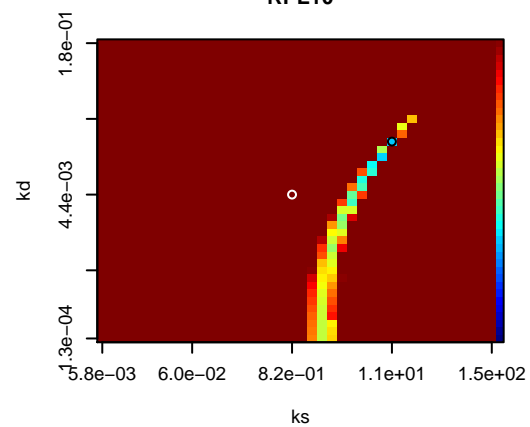

RAS2

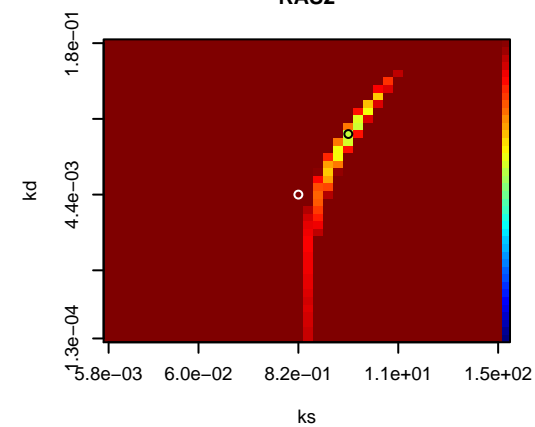

CLC1

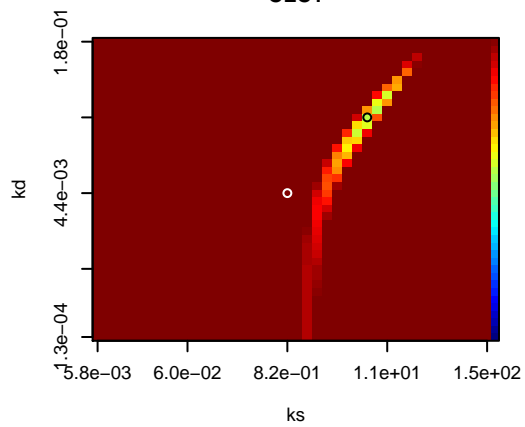

TRR2

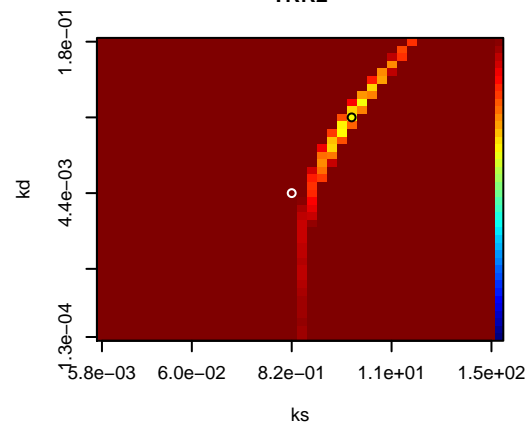

LHP1

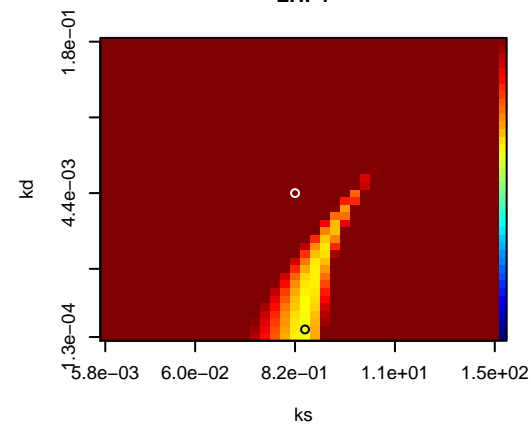

GRX5

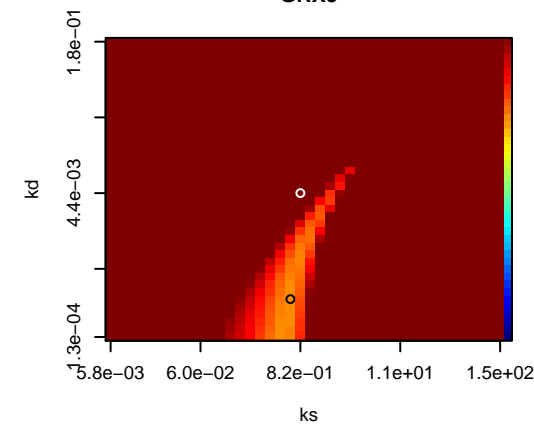

ADE17

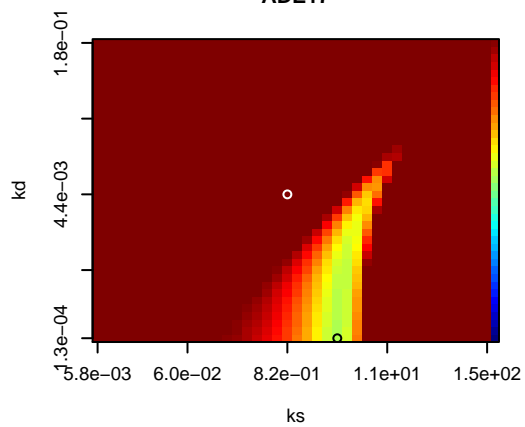

HMO1

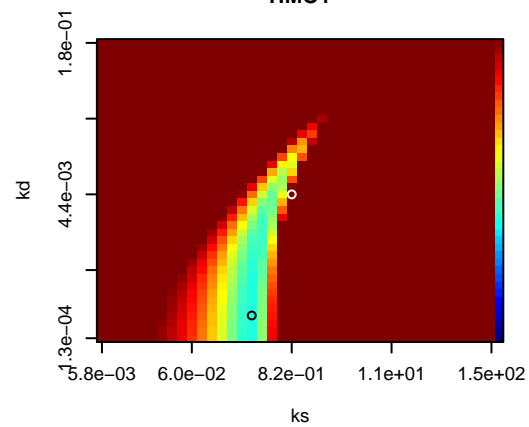

COX6

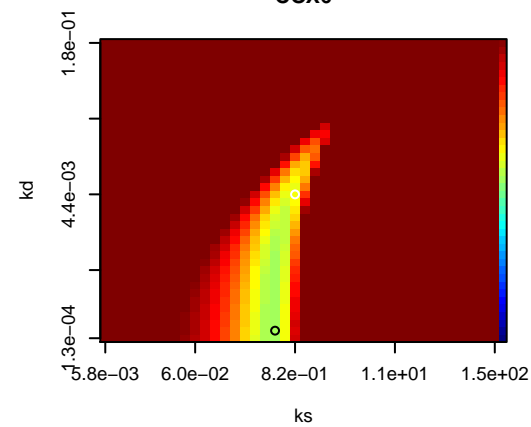

MET17

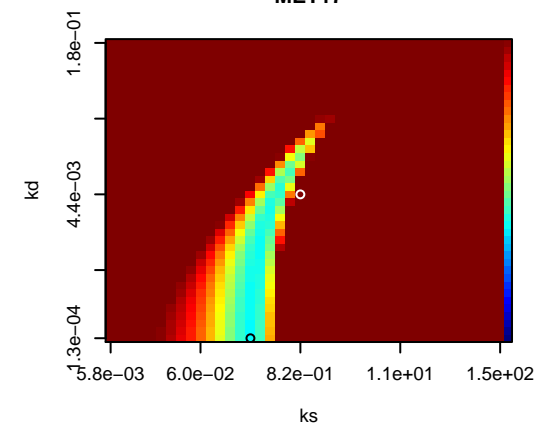

PRE9

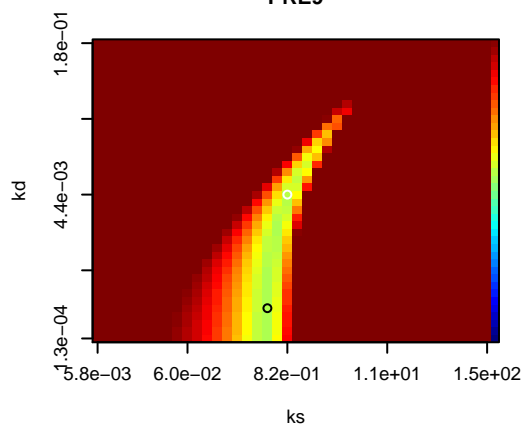

AIP1

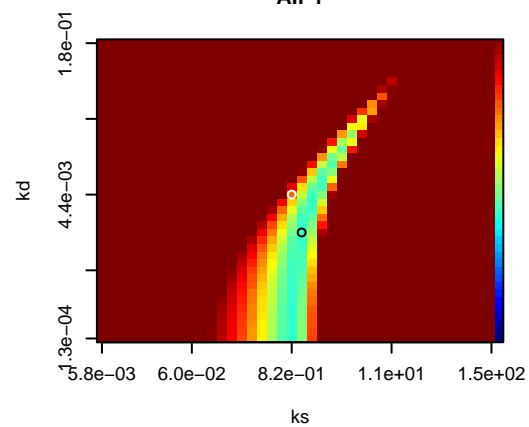

MES1

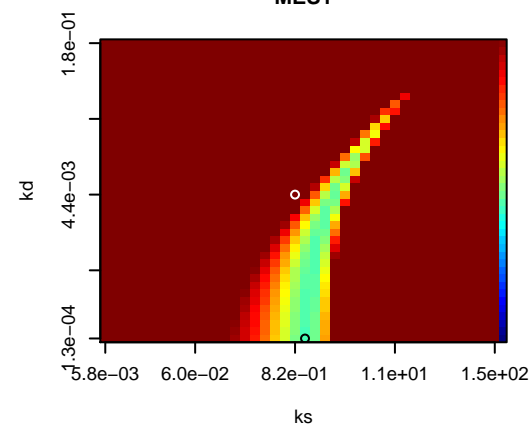

PRE5

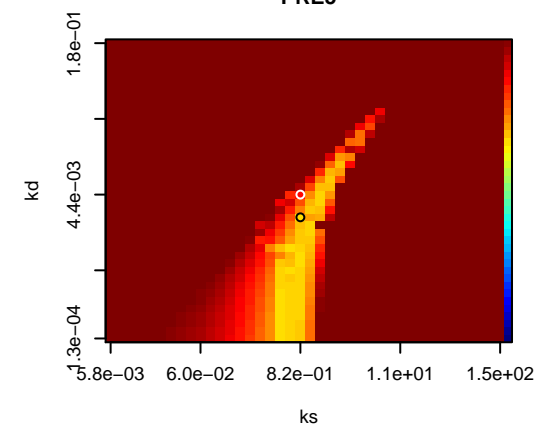

ALT2

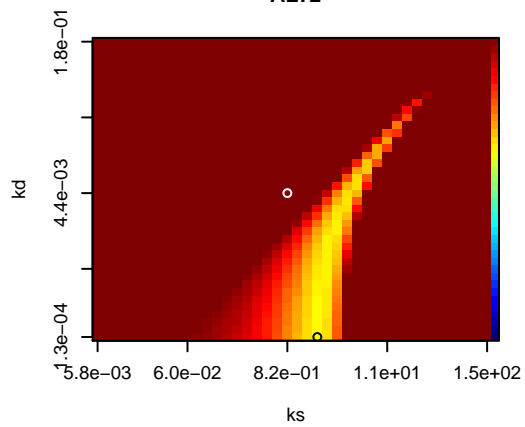

TPM1

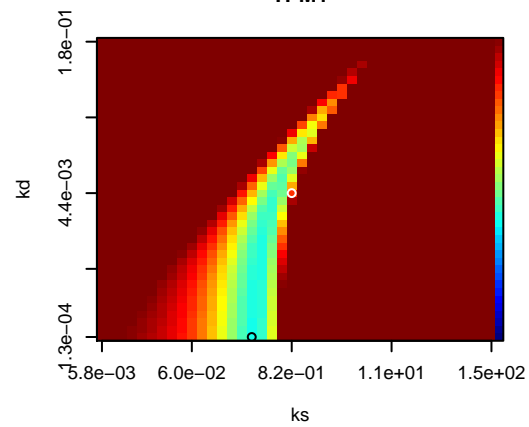

GRX1

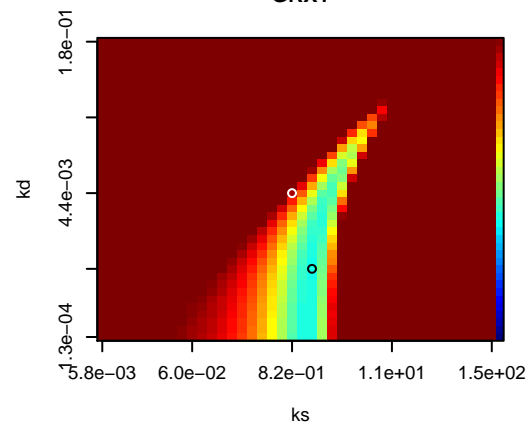

DAK1

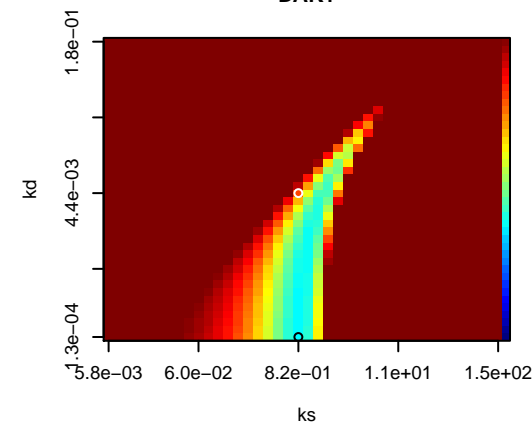

ADK1

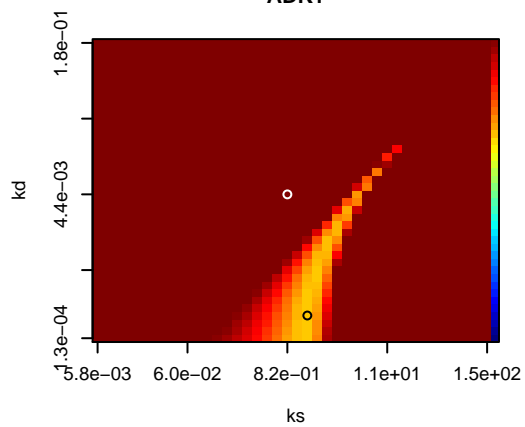

ENO2

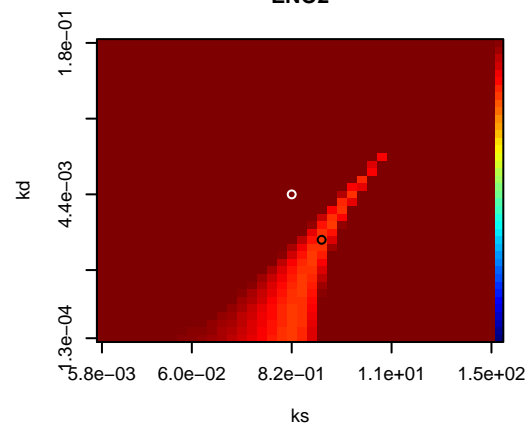

ARC1

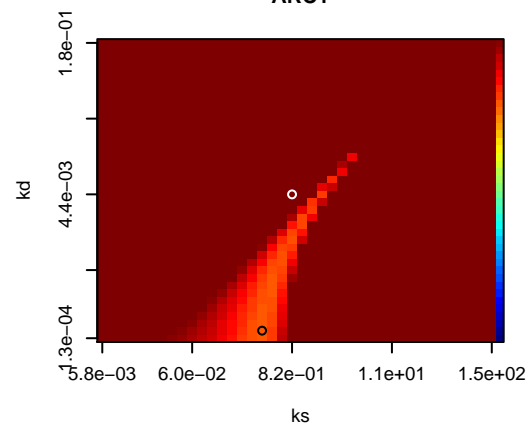

HXK2

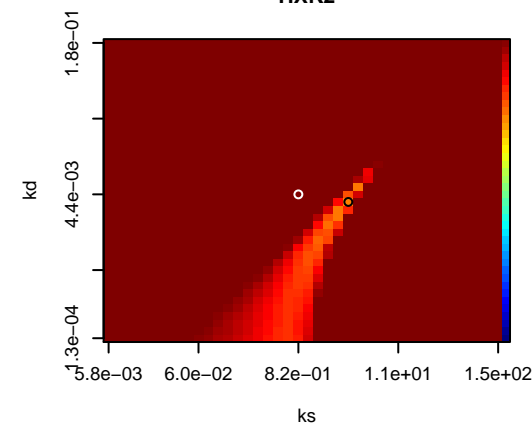

YNK1

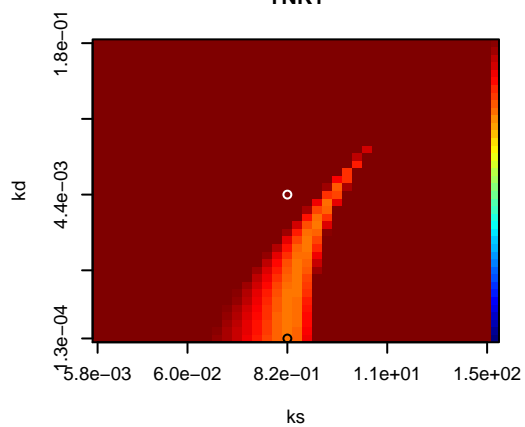

TYS1

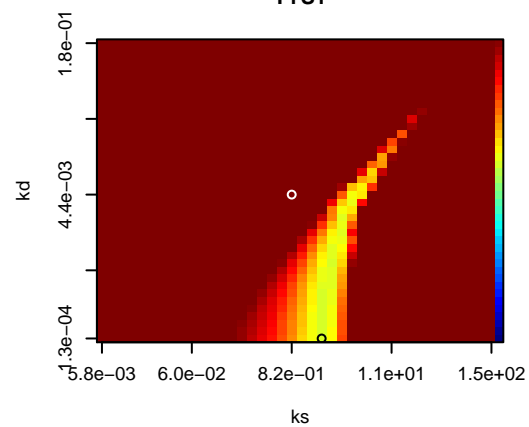

PRO3

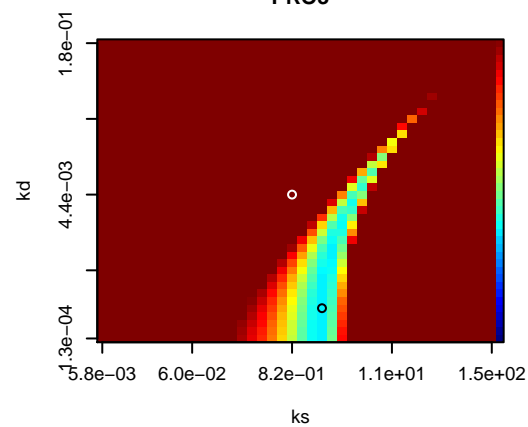

ARO4

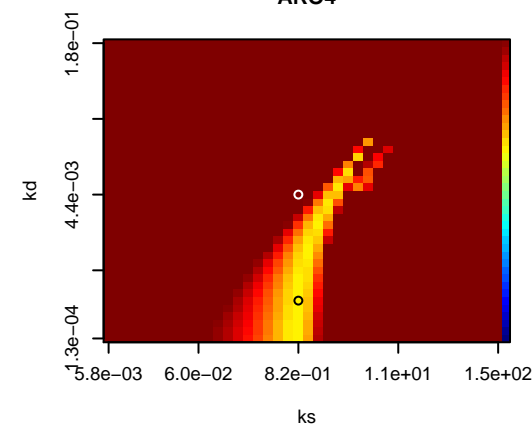

LYS2

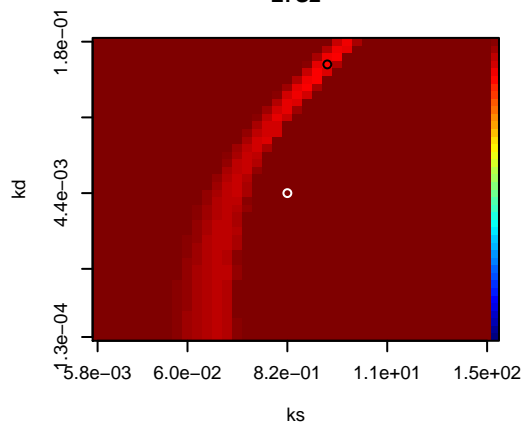

PRD1

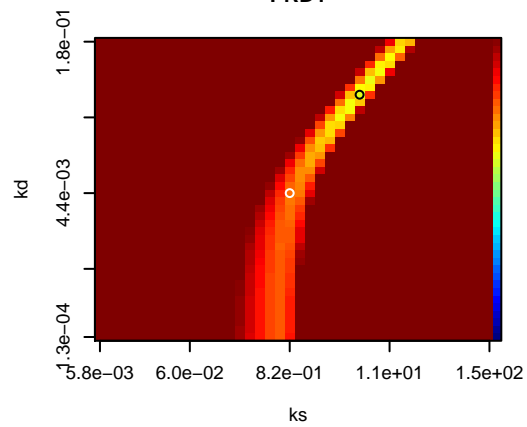

RFT1

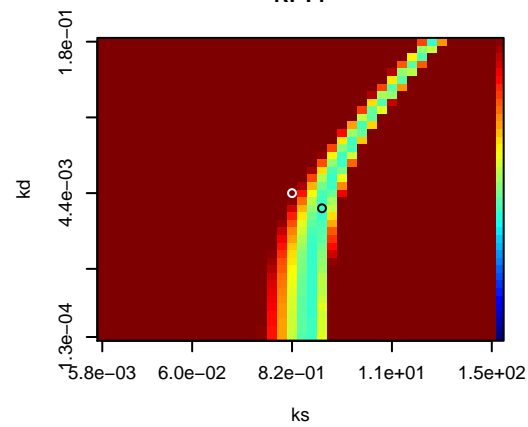

YMR295C

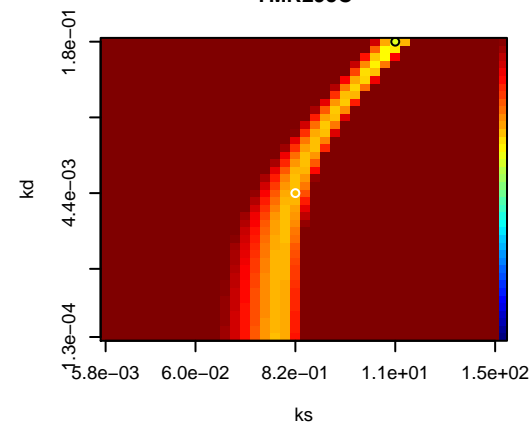

RPB2

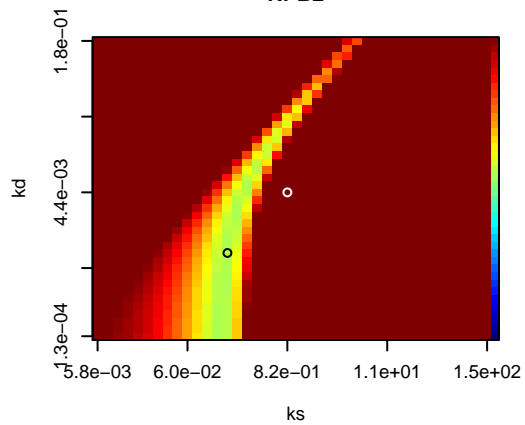

YDJ1

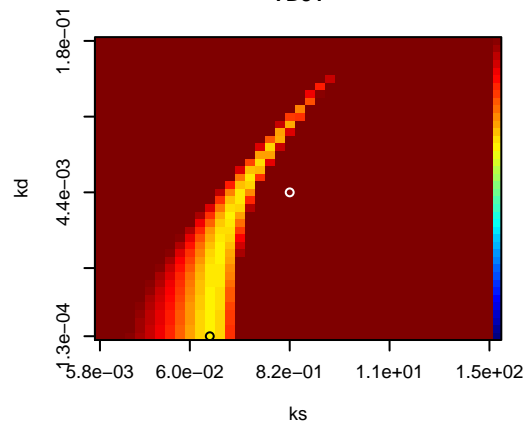

PRE7

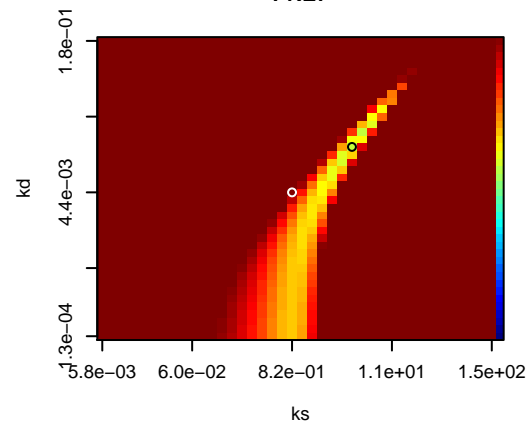

PDI1

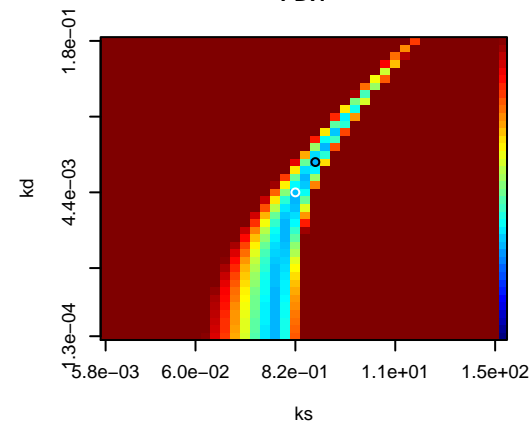

PFK2

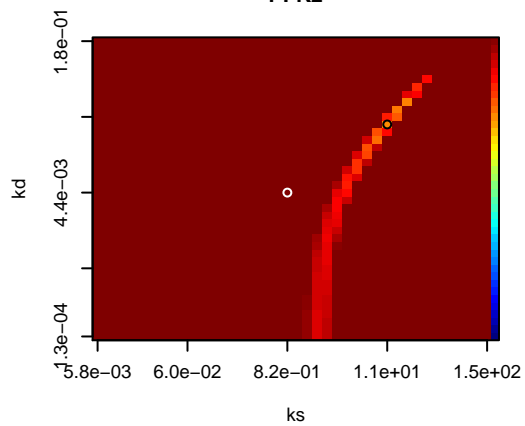

RPS21A

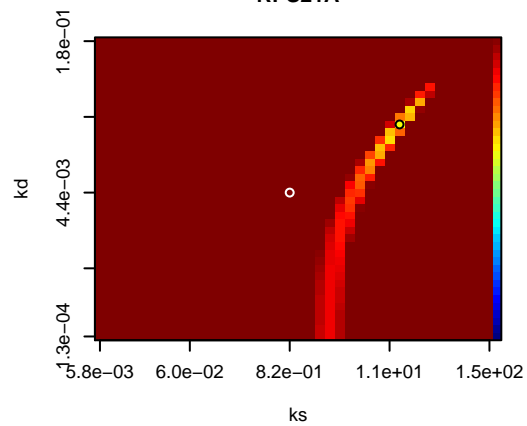

ENO1

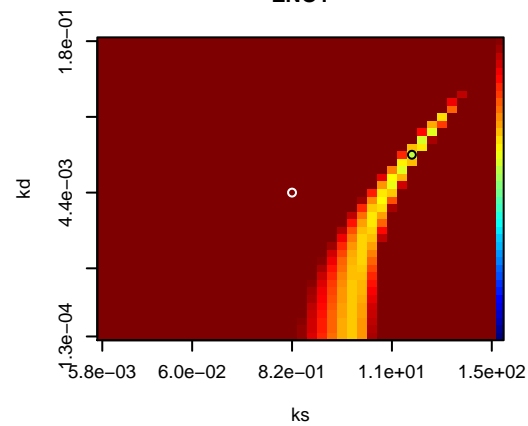

TSR1

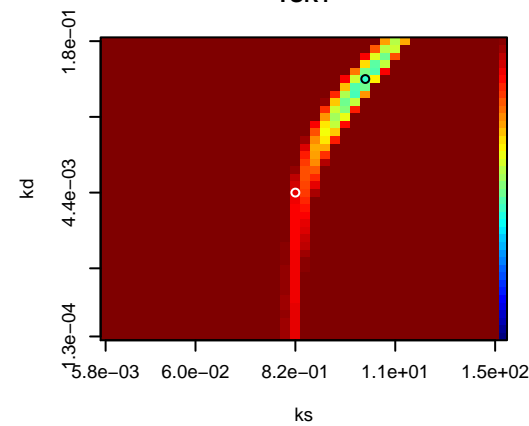

SGT2

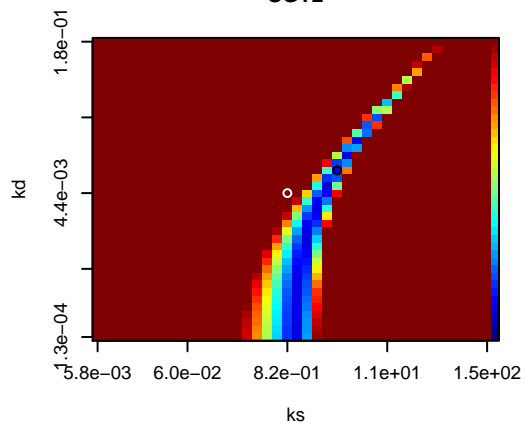

RIB3

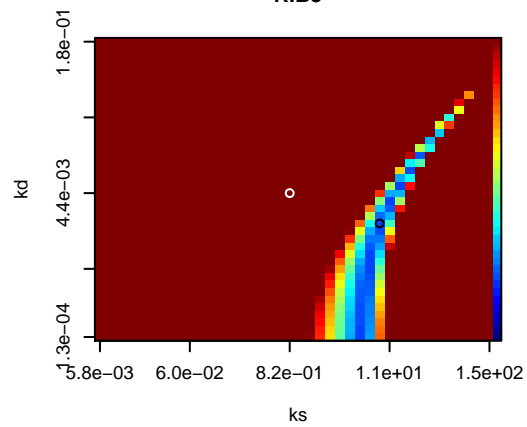

HHF1

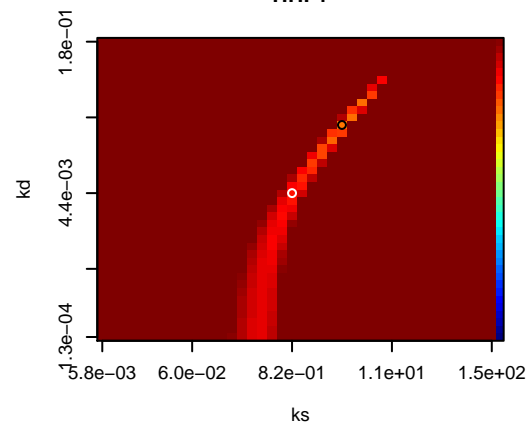

TUP1

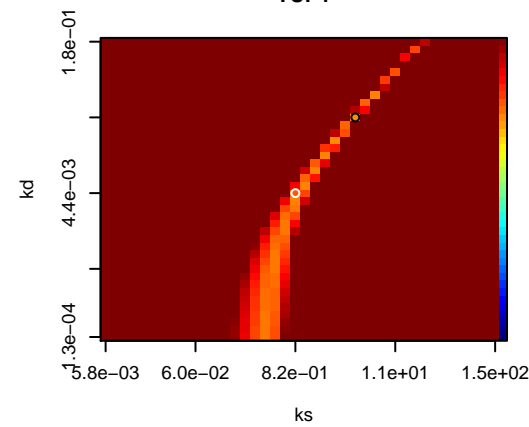

PDB1

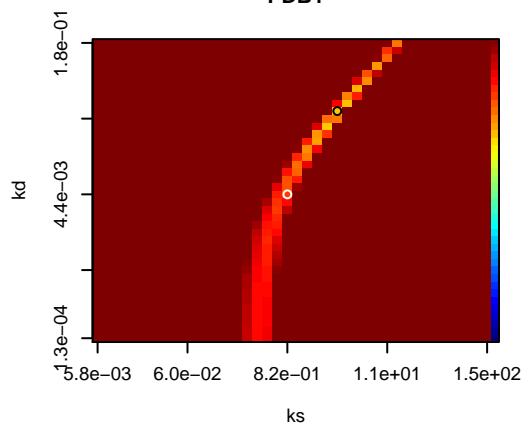

NSP1

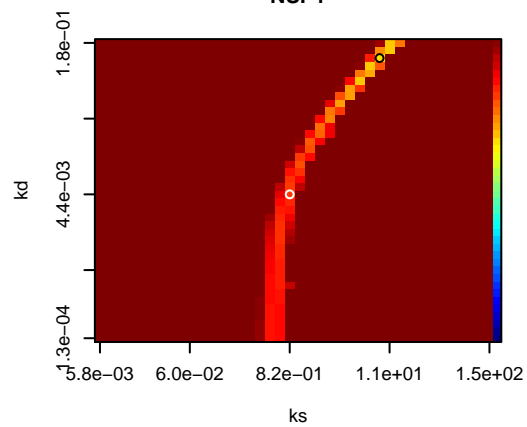

ZUO1

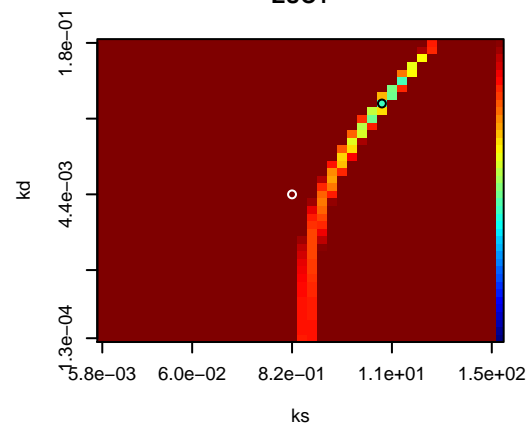

POL2

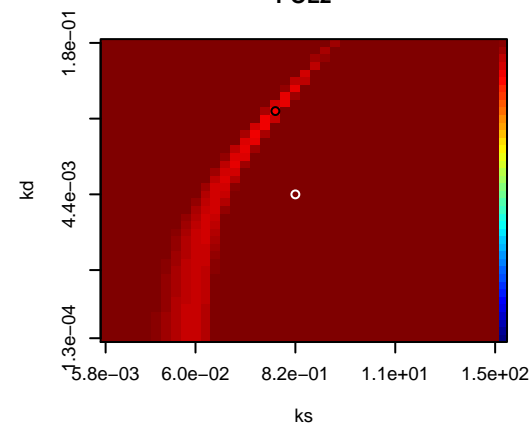

ASN2

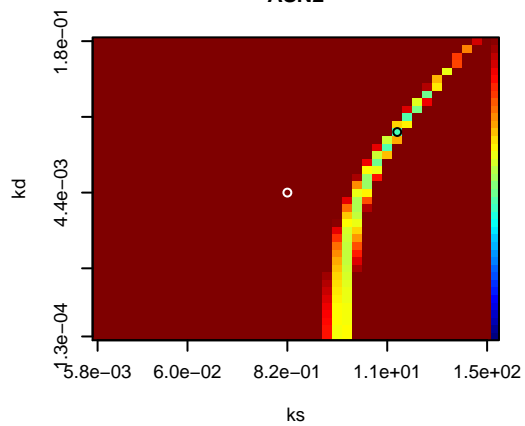

MET22

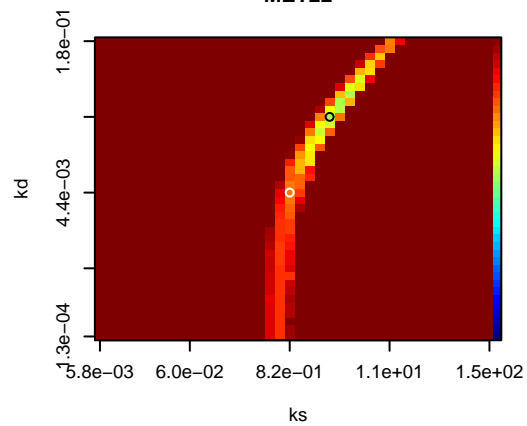

FUR1

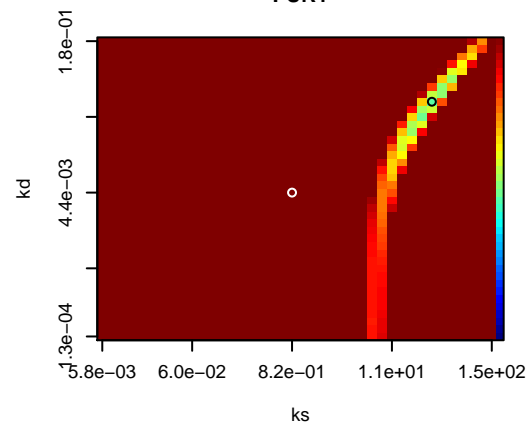

EDE1

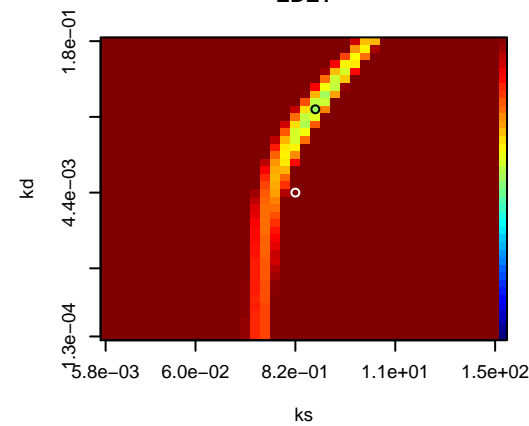



IRC5

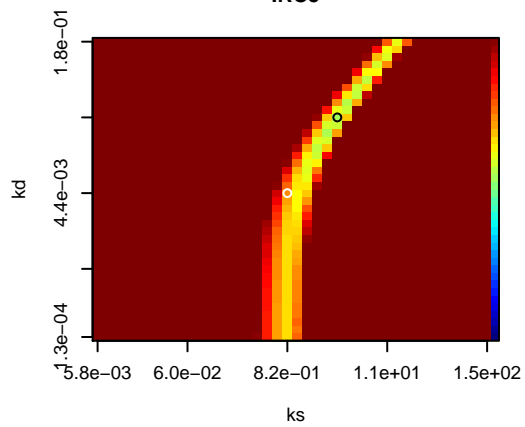

PSA1

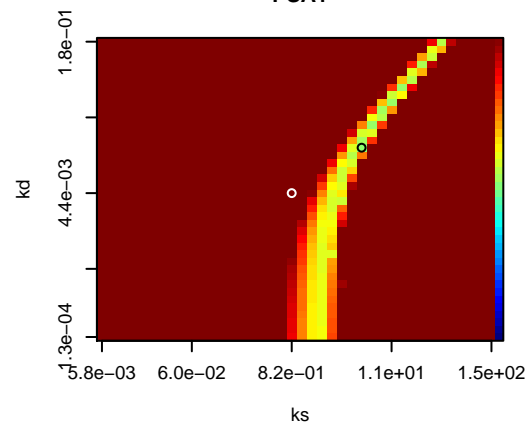

GDI1

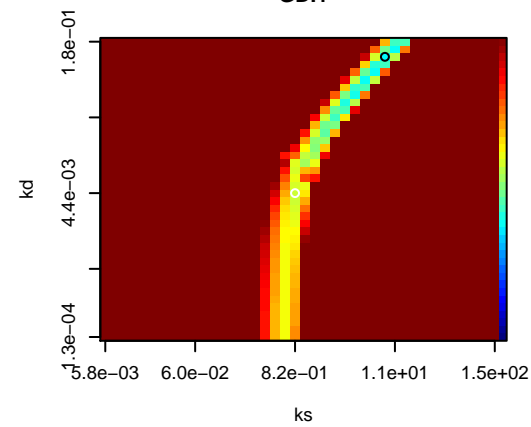

YOL057W

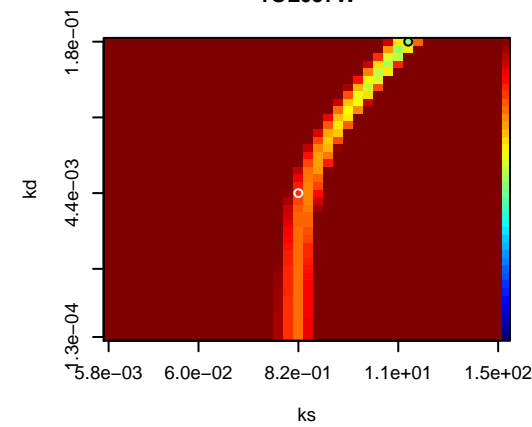

ASN1

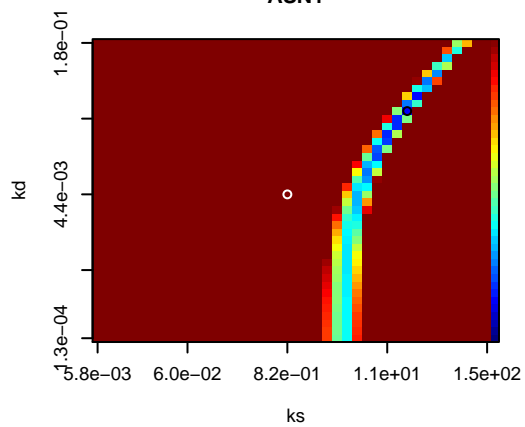

GEA1

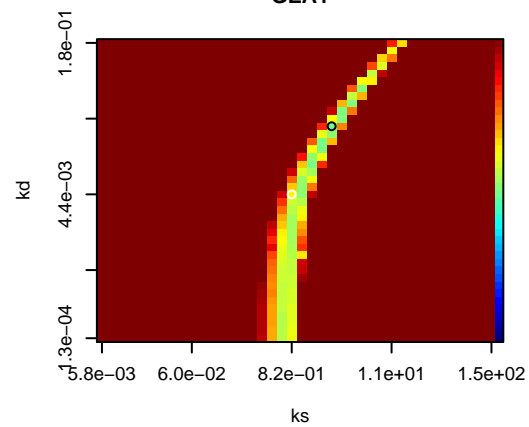

SSA3

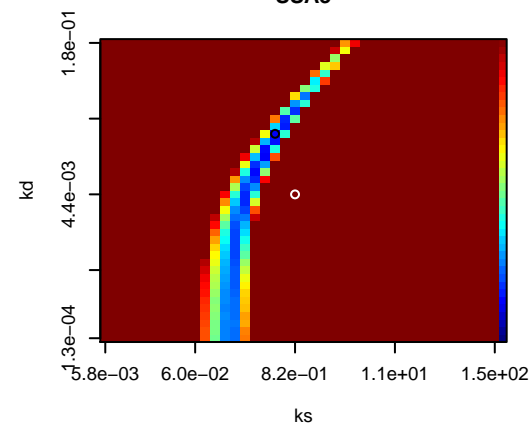

LAP3

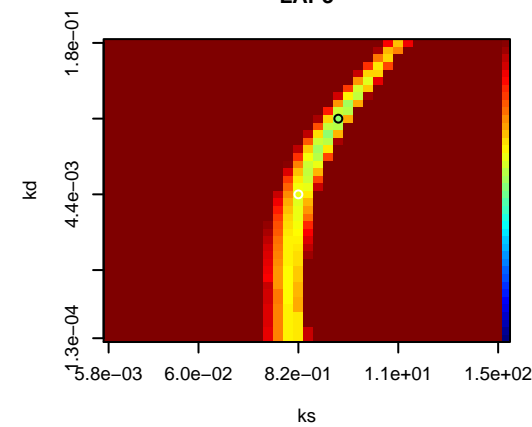

ARO1

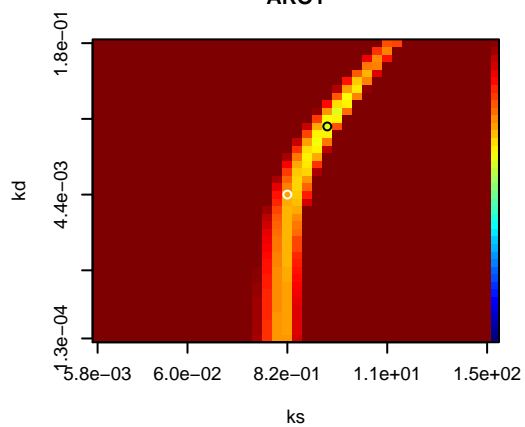

YPR1

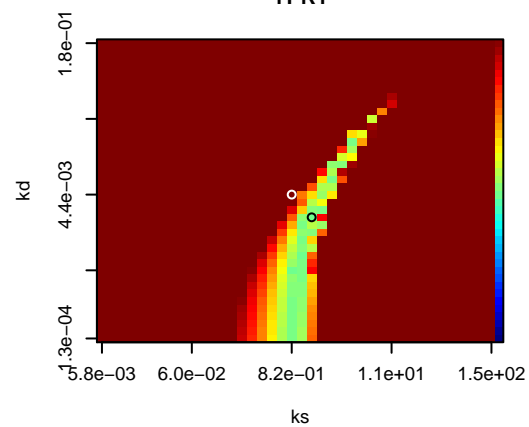

GUK1

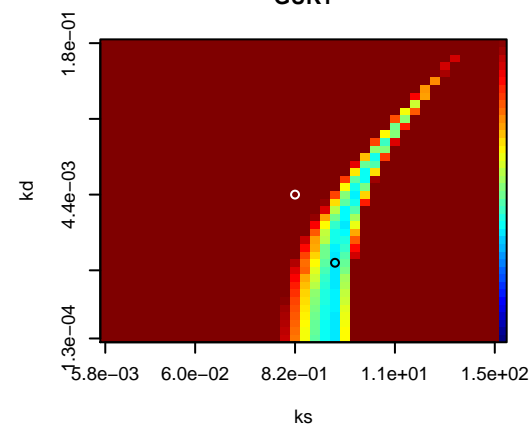

ZWF1

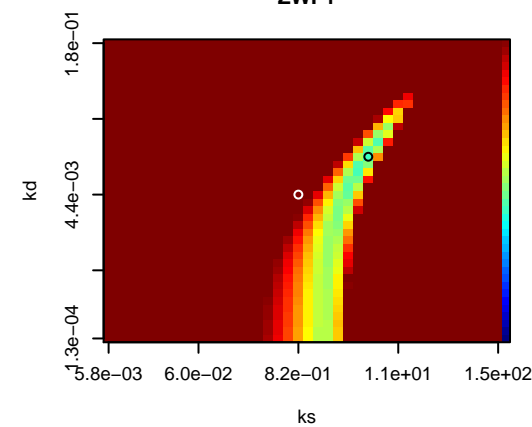

HYP2

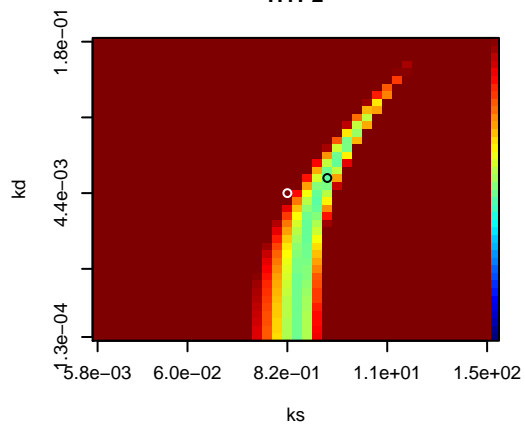

CCS1

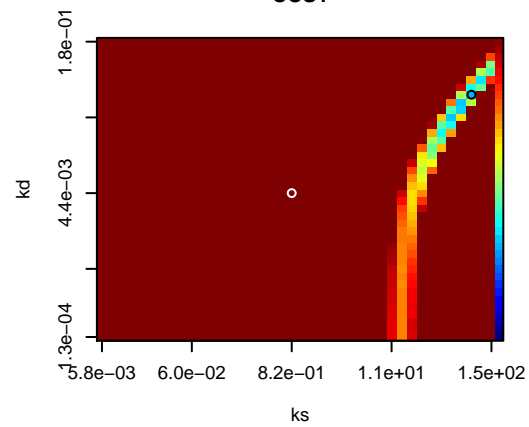

SSC1

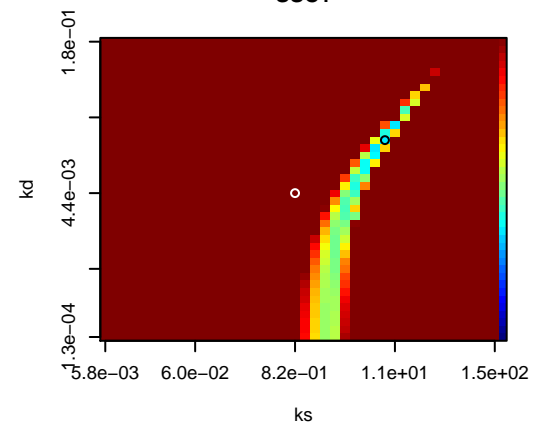

REV3

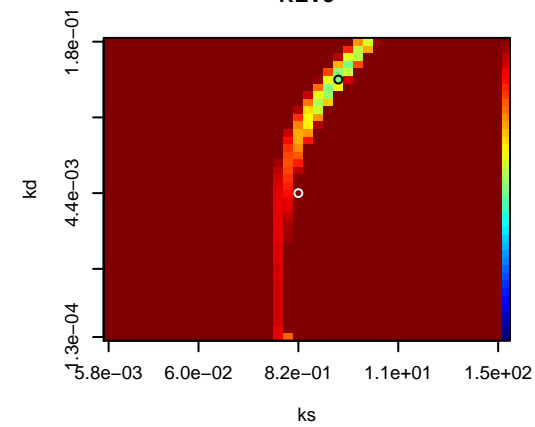

PUT2

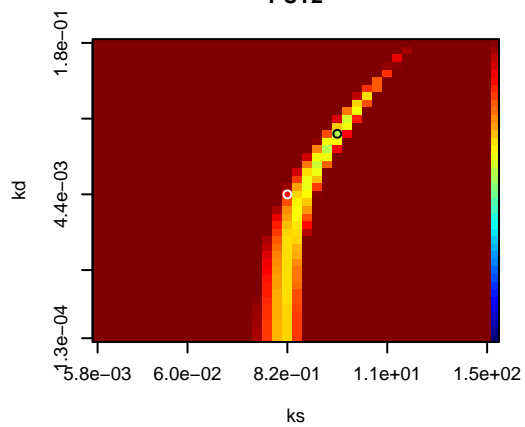

TOS1

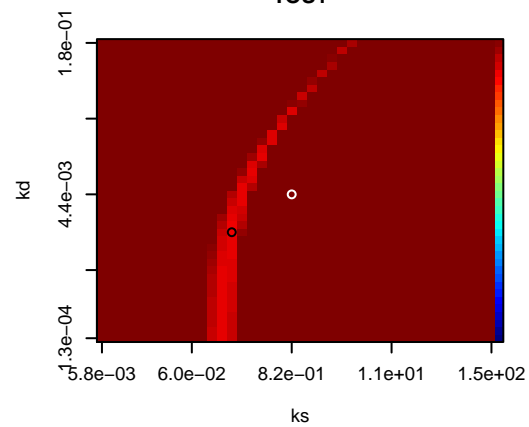

PRE6

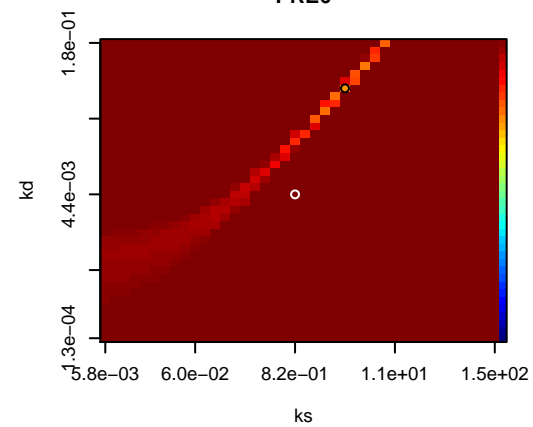

Supplement: c4mb00358f2.zip [file c4mb00358f2.zip]
