# Supplementary material for: One third of dynamic protein expression profiles can be predicted by a simple rate equation
Source: Royal Society of Chemistry journal article supplement (doi:10.1039/c4mb00358f), 2014-08-01

SRP1

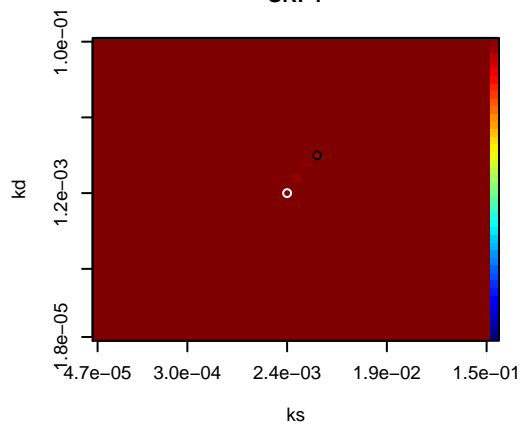

TY1B-BR

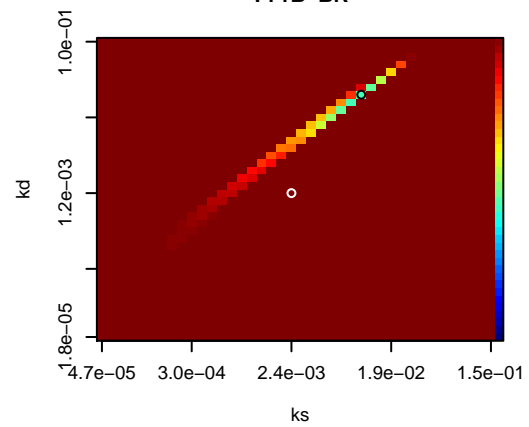

TY1B-DR5

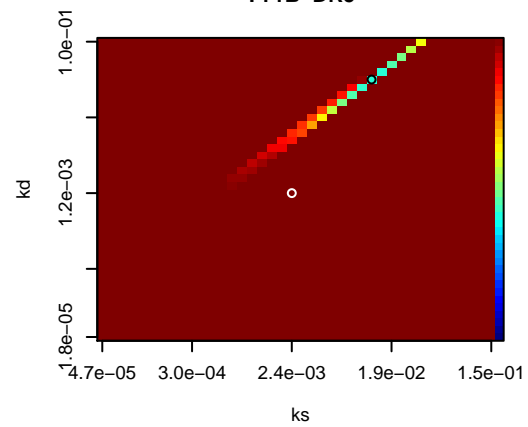

RPL11B

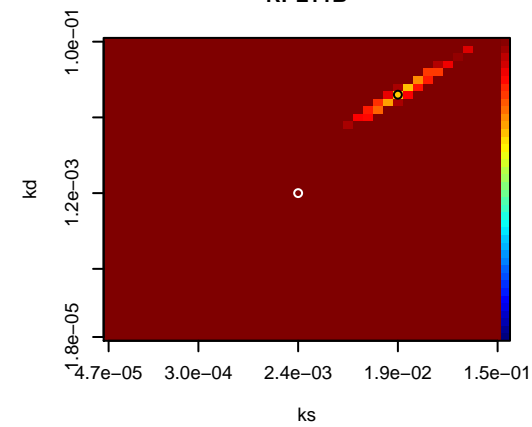

HOM3

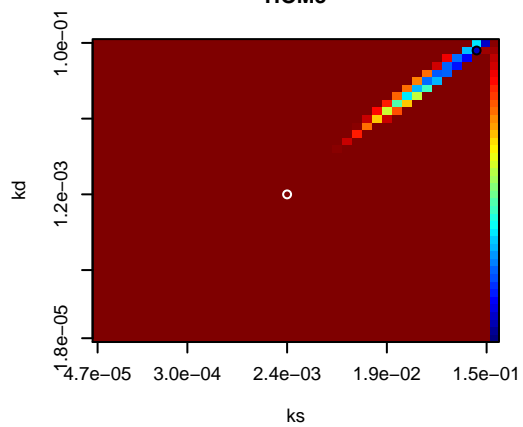

LYS20

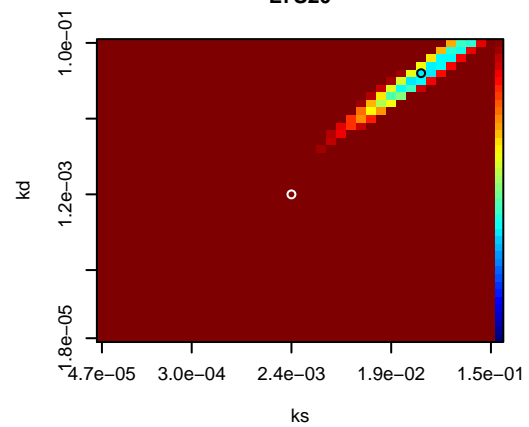

SSZ1

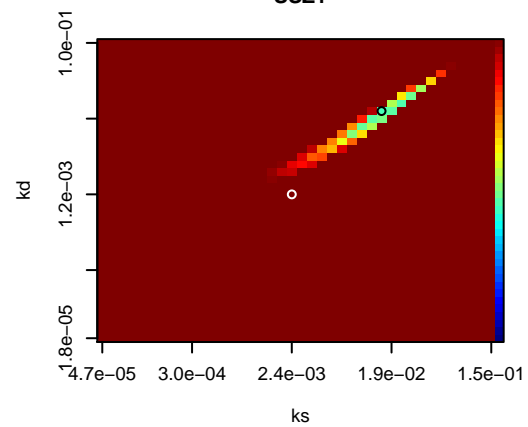

BAT1

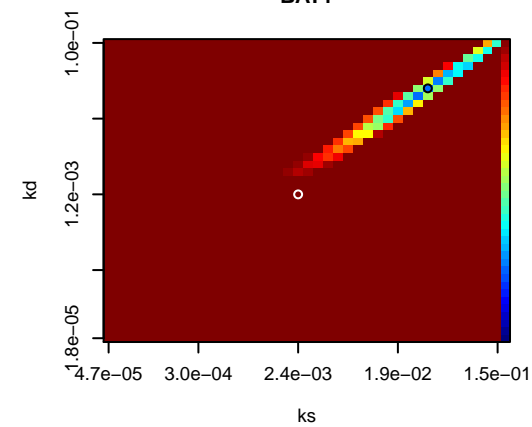

RPL9B

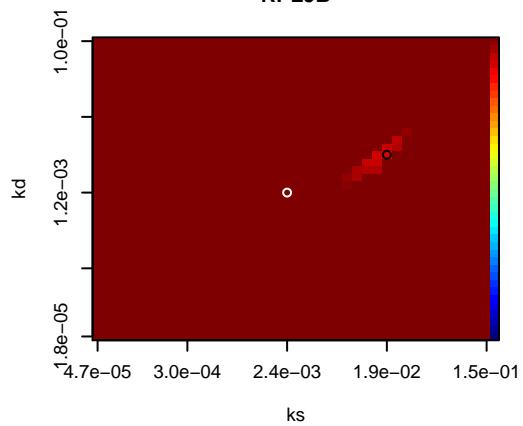

VMA5

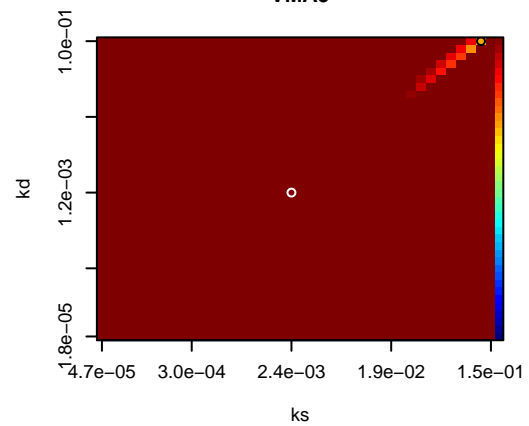

STI1

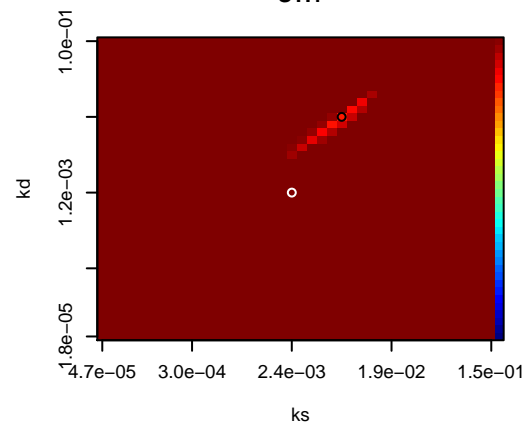

TAL1

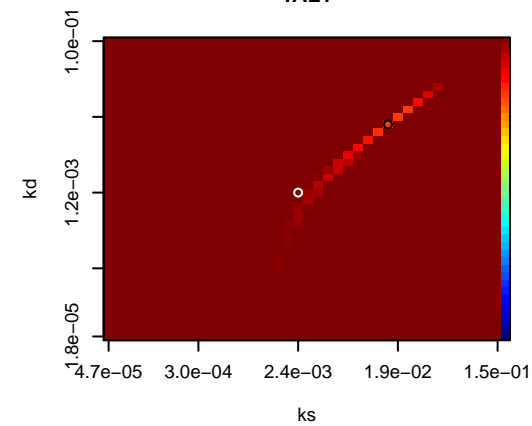

**GAS1**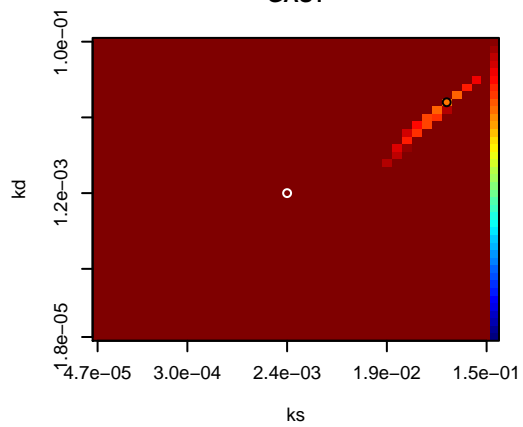**VPS1**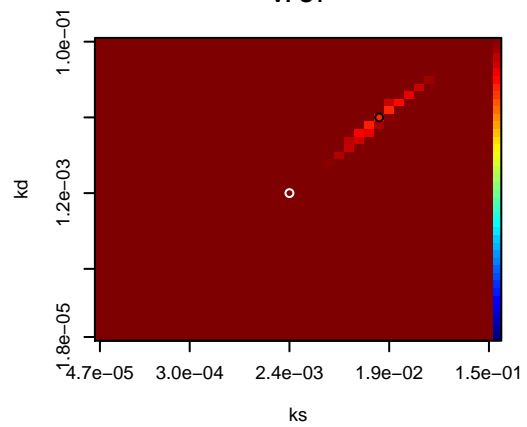**RPS7B**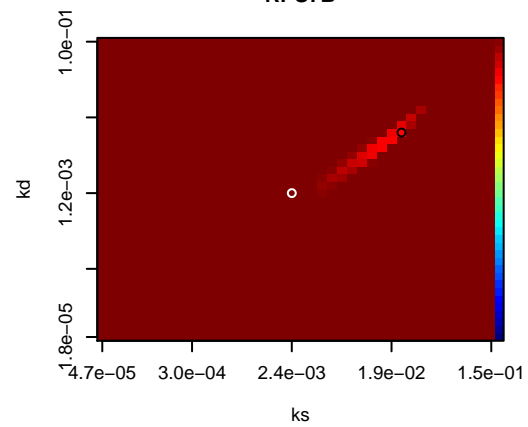**RPL31A**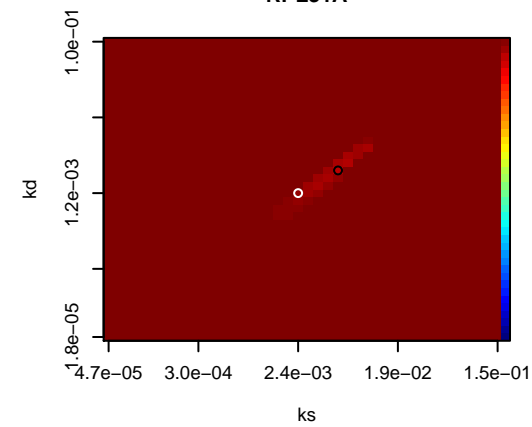**RPL31B**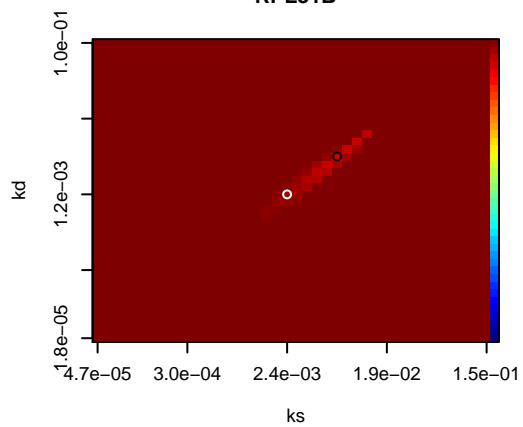**KAP95**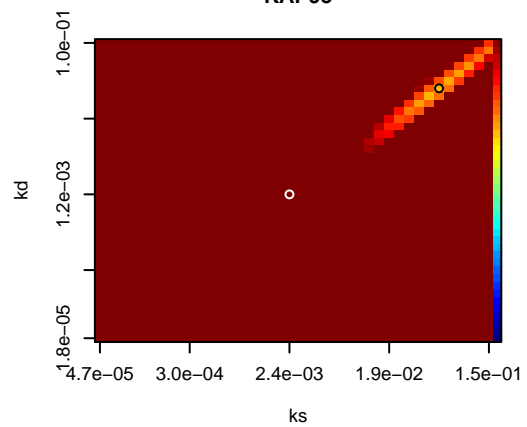**TPS1**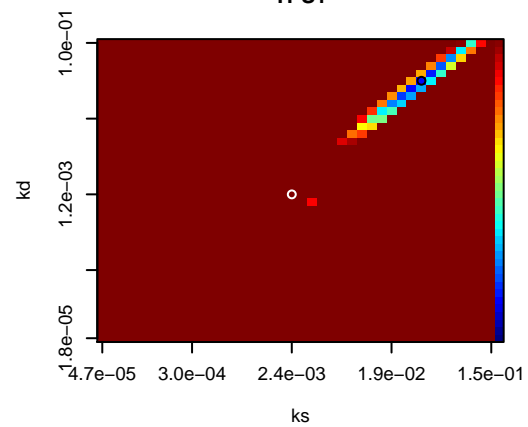**GLK1**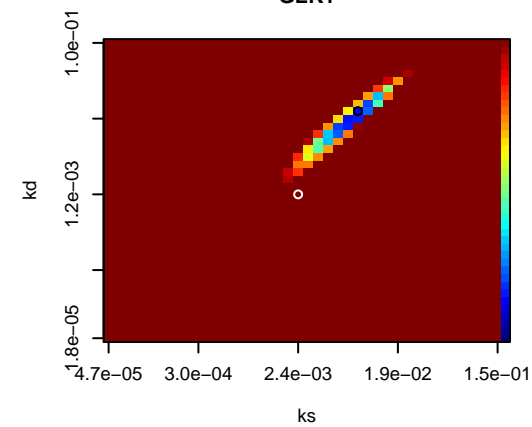**SEC24**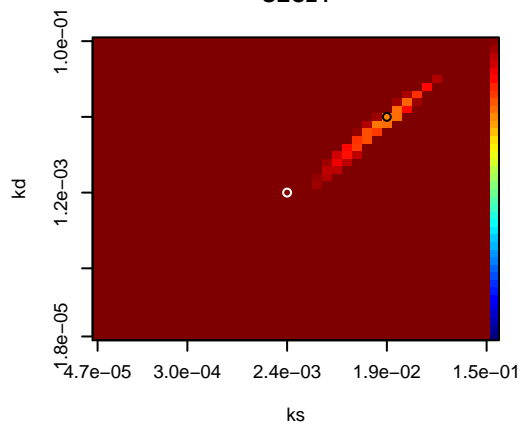**TY1B-DR3**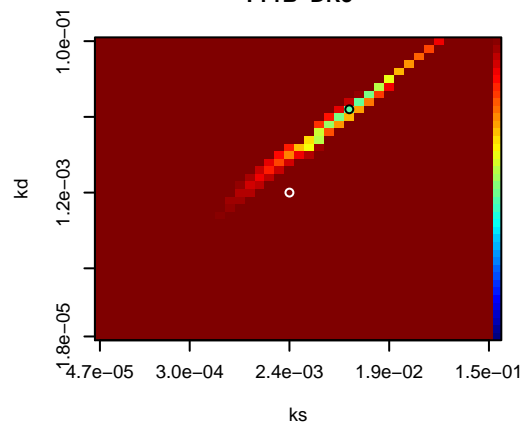**CHC1**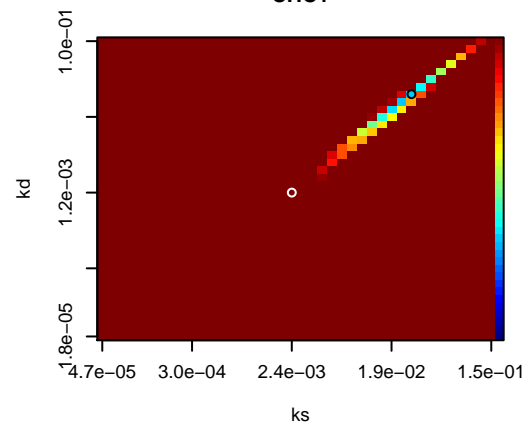**TY1A-A**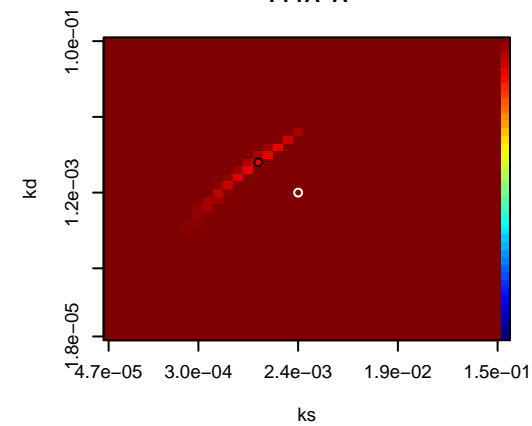

TY1A-DR3

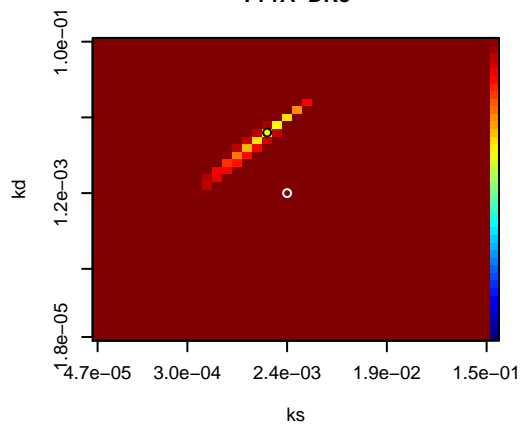

SEC21

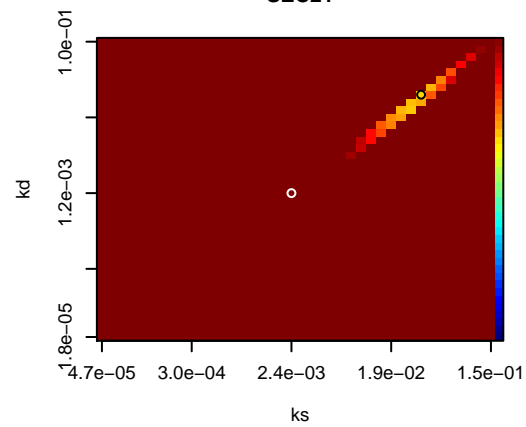

TEF2

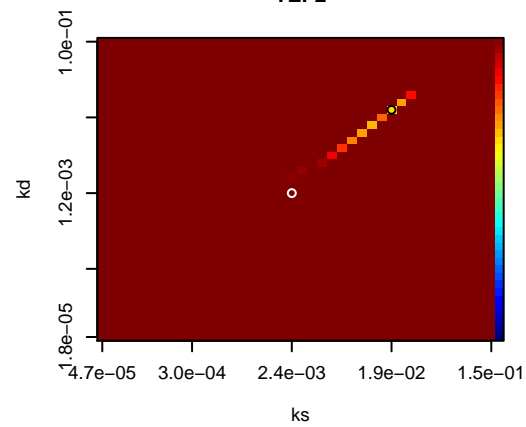

ARC1

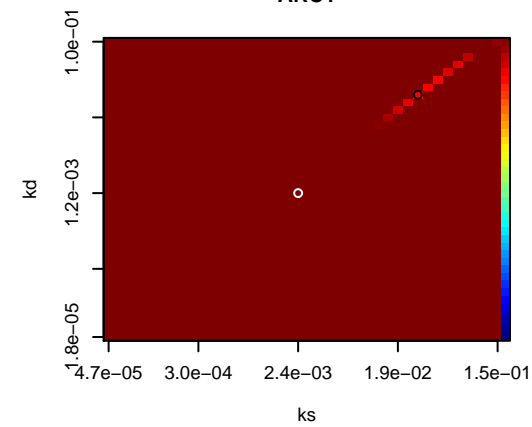

FKS1

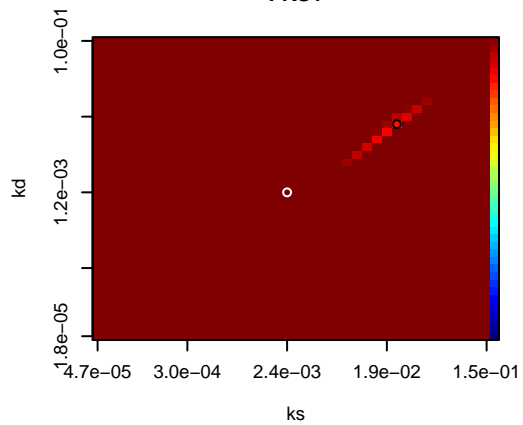

FRS2

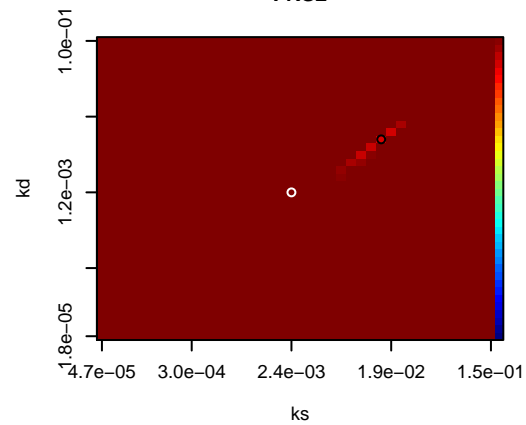

THS1

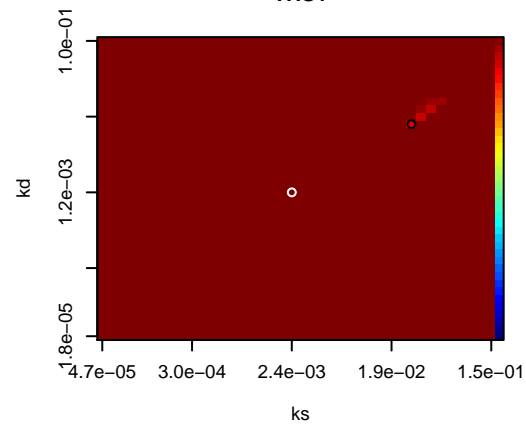

MAP1

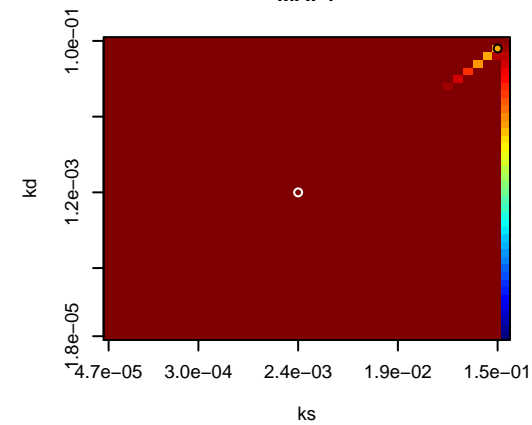

ARO2

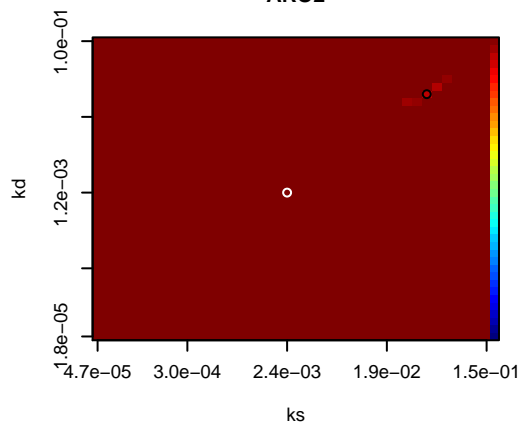

TRP2

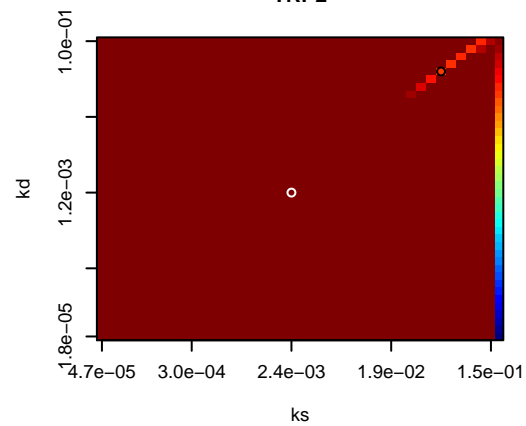

CLU1

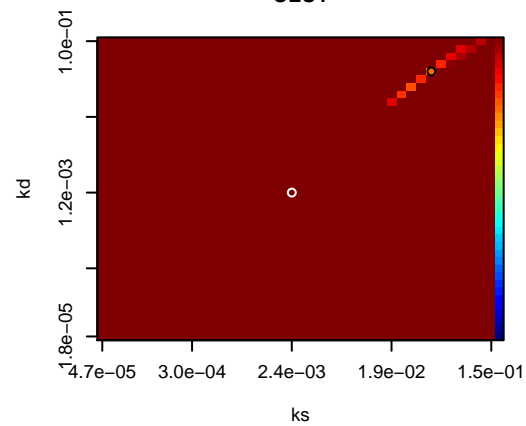

ARX1

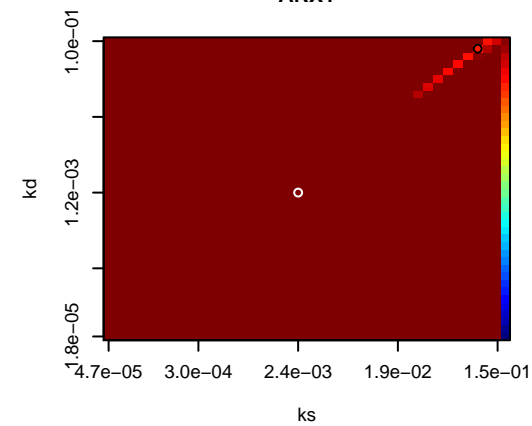

Supplement: c4mb00358f2.zip [file c4mb00358f2.zip]
