# Supplementary material for: One third of dynamic protein expression profiles can be predicted by a simple rate equation
Source: Royal Society of Chemistry journal article supplement (doi:10.1039/c4mb00358f), 2014-08-01

ALD6

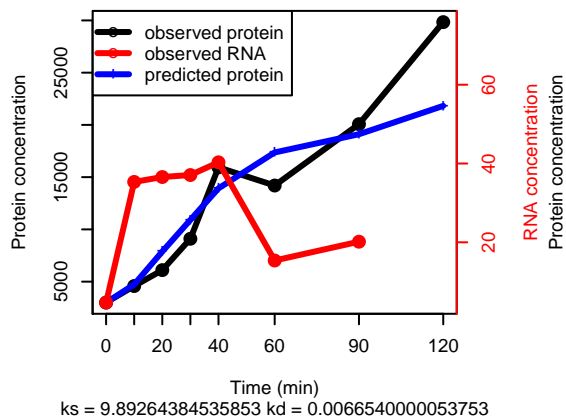

PGM2

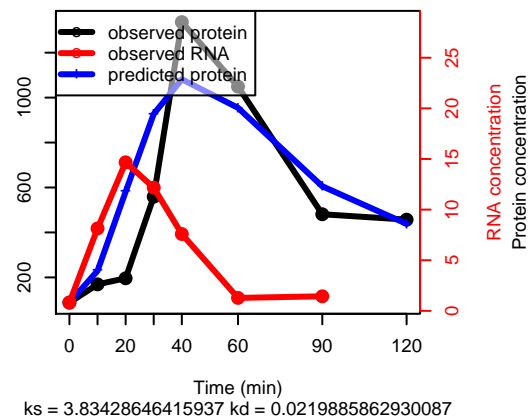

QCR2

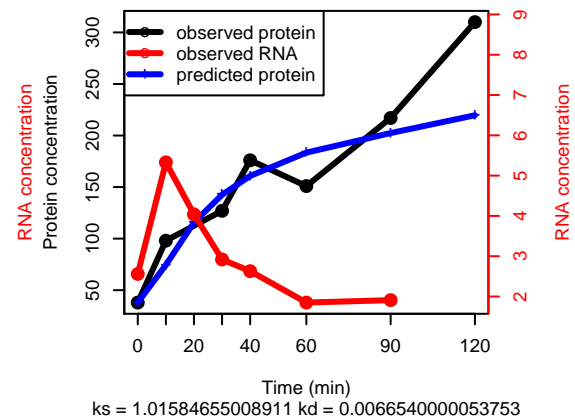

HSP10

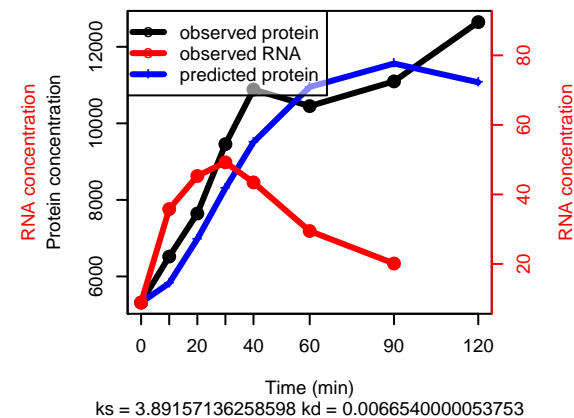

SSA1

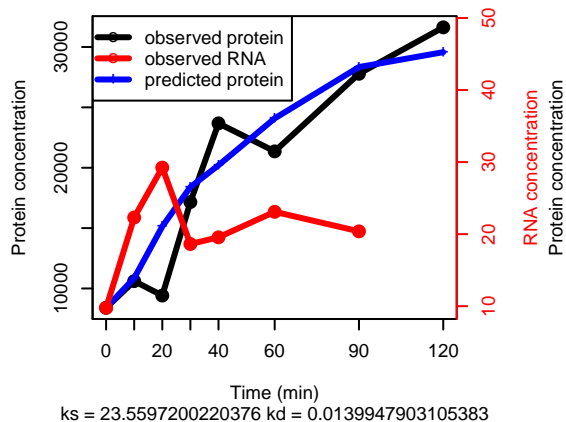

SSA2

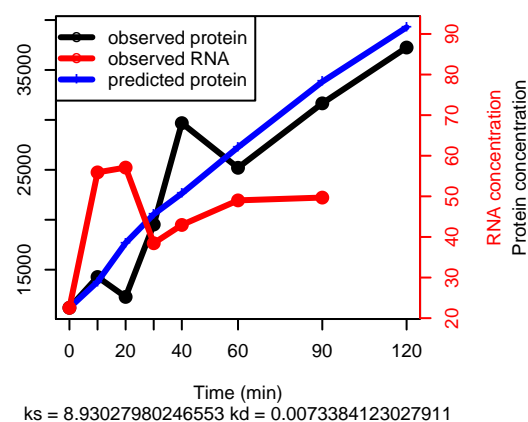

FPR3

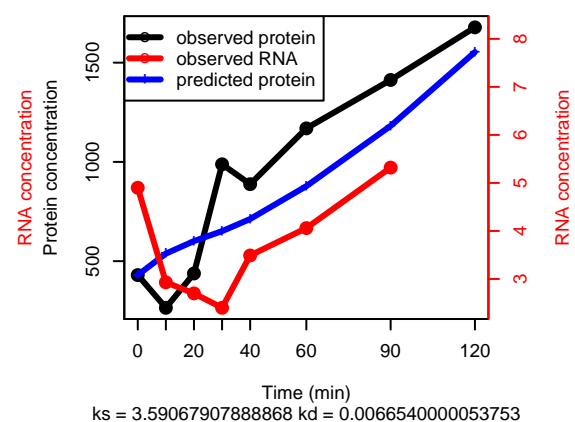

FAS2

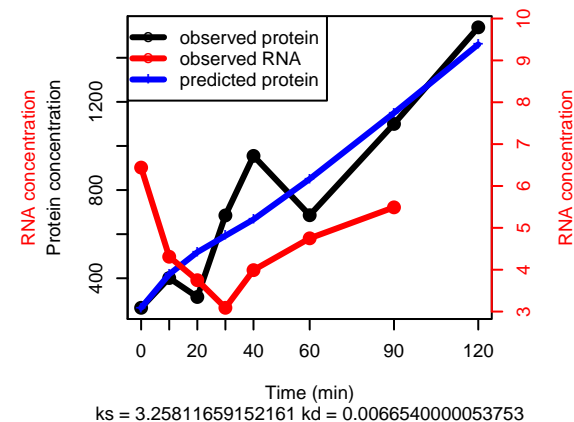

ATP1

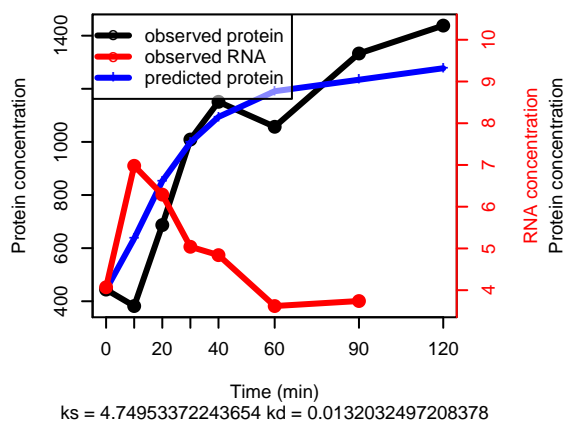

MDH3

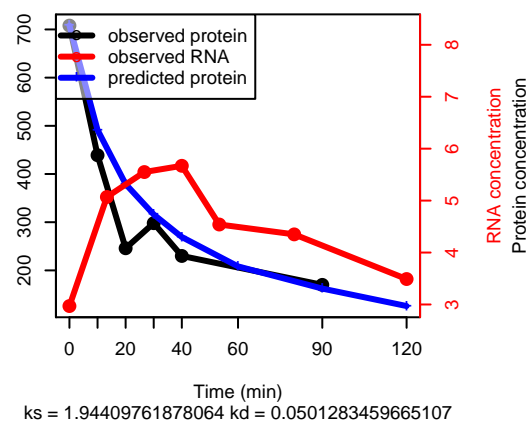

YHR020W

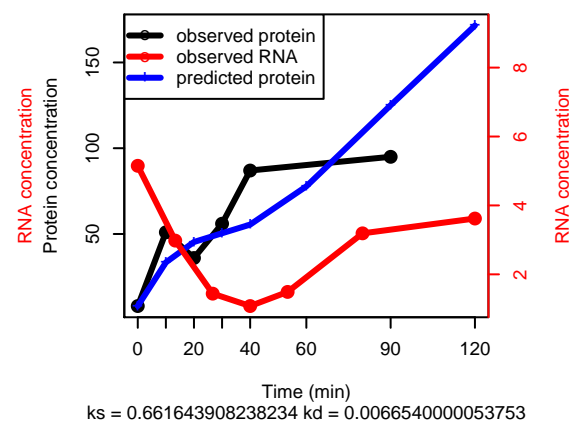

SOD1

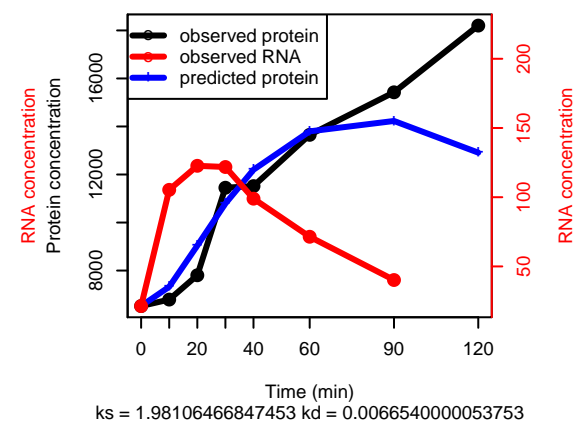

HSP31

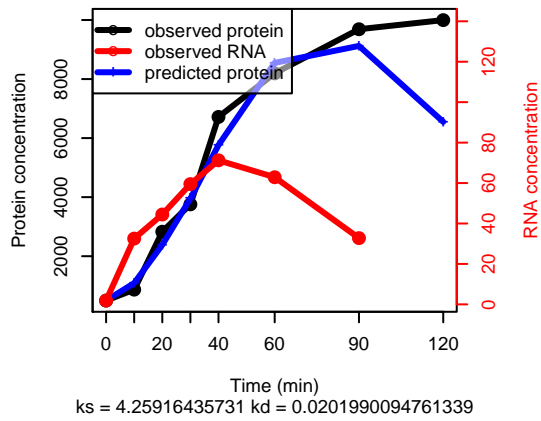

PST2

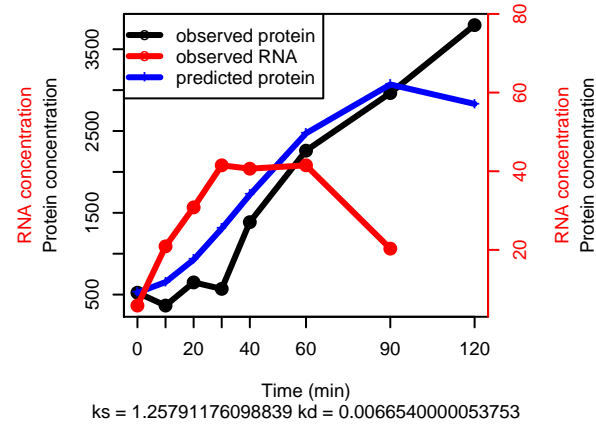

HSP60

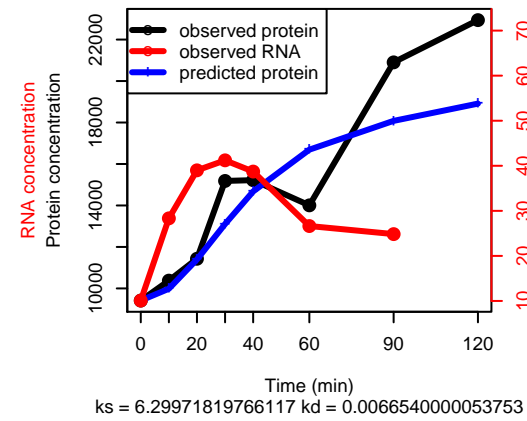

SSA3

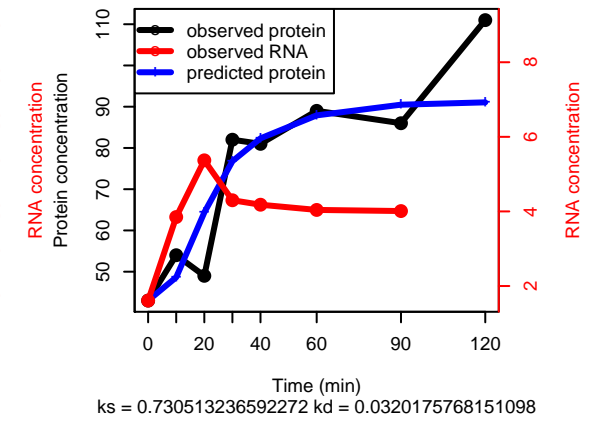

SGT2

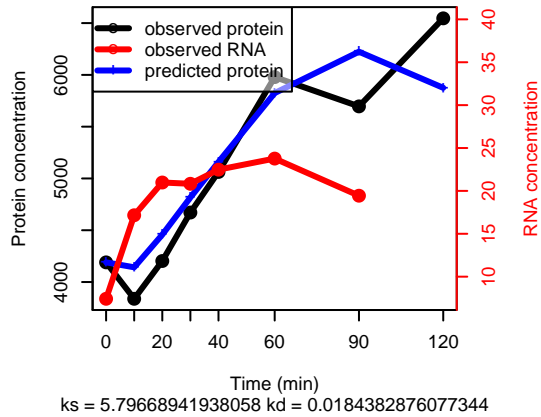

ERB1

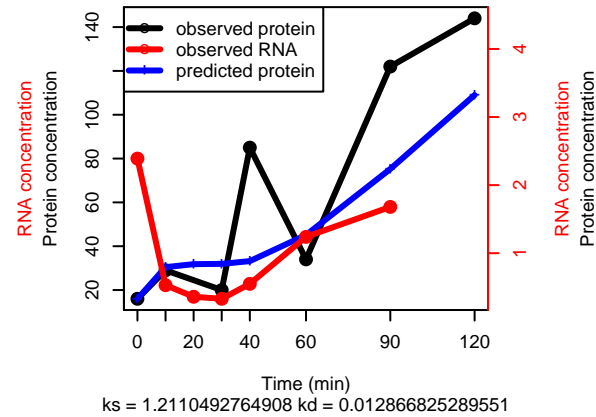

YNL134C

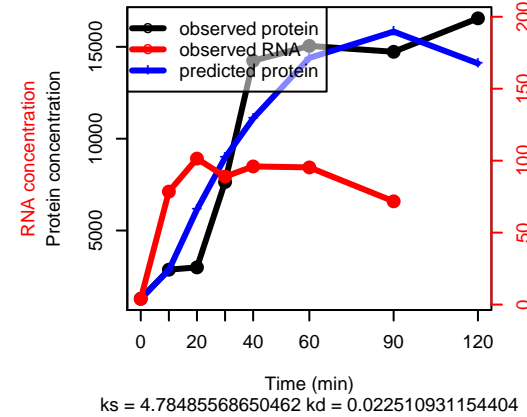

SSE1

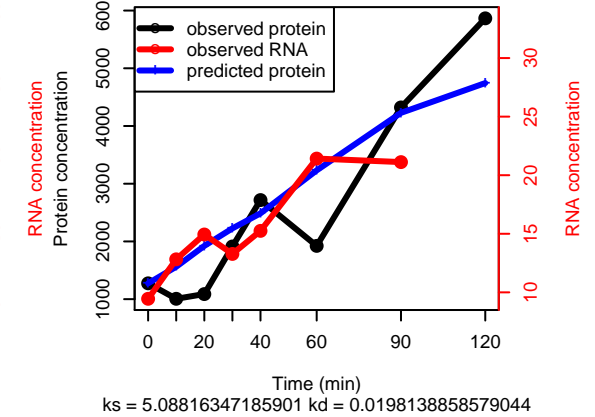

RPL32

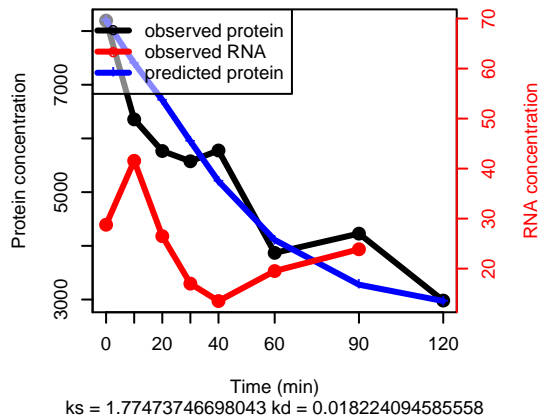

RPL27A

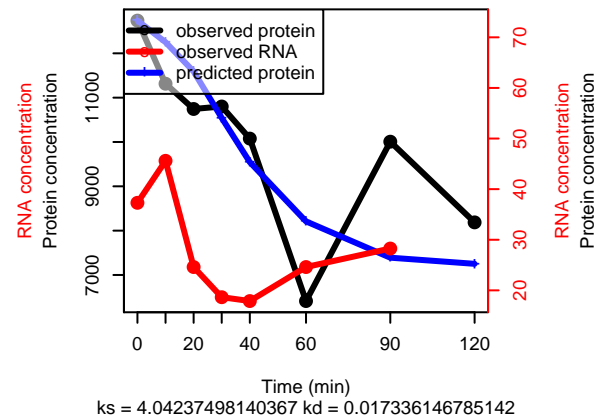

RPS22A

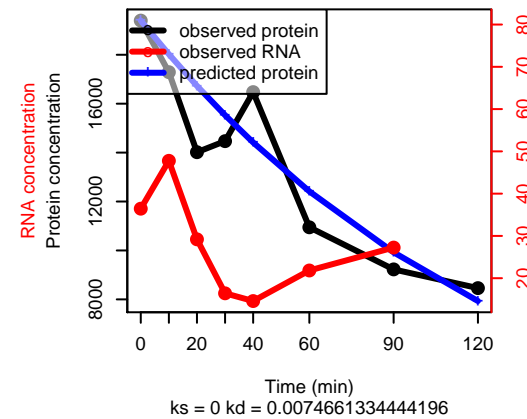

HIS1

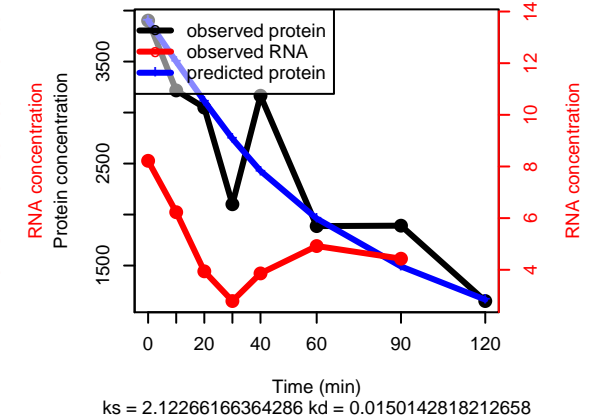

ADE6

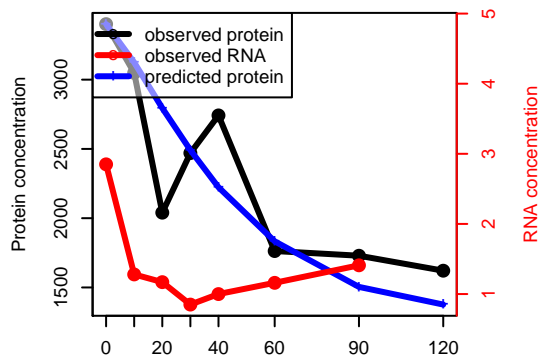

Time (min)  
ks = 12.4423196870037 kd = 0.0163107702550183

GND1

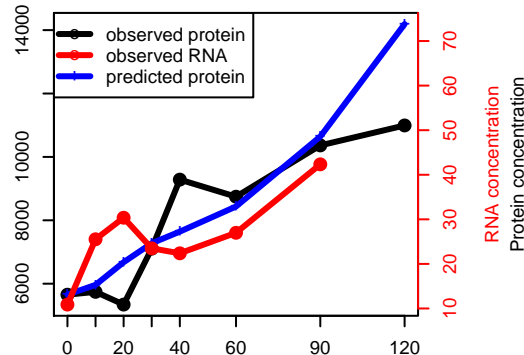

Time (min)  
ks = 4.68531165370328 kd = 0.009425797455148

RPL12B

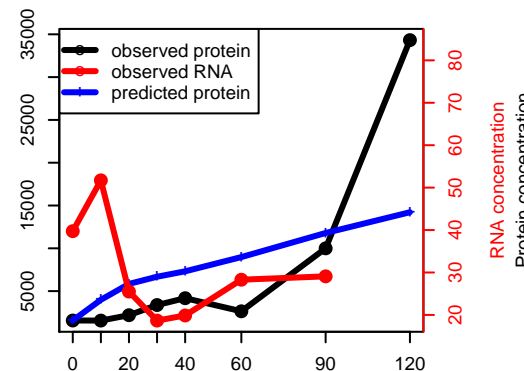

Time (min)  
ks = 5.68542193175054 kd = 0.0066540000053753

CYS4

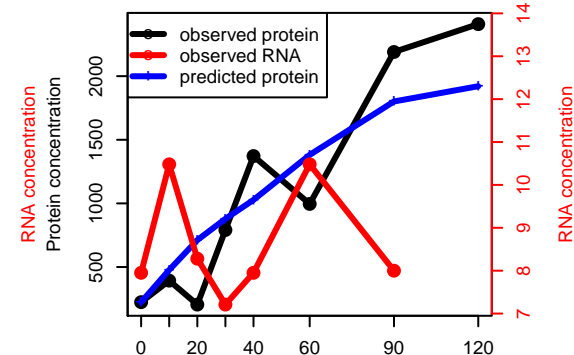

Time (min)  
ks = 3.08070819732033 kd = 0.00895545842095435

TIF3

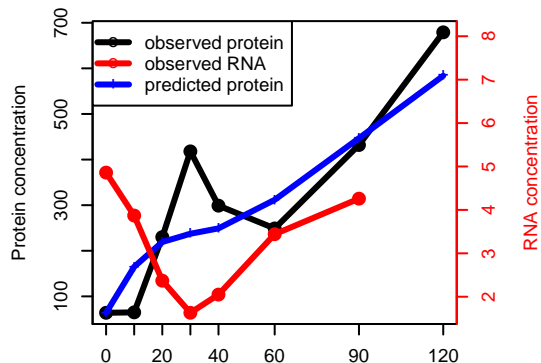

Time (min)  
ks = 2.74551525822708 kd = 0.0161020294223292

ASN1

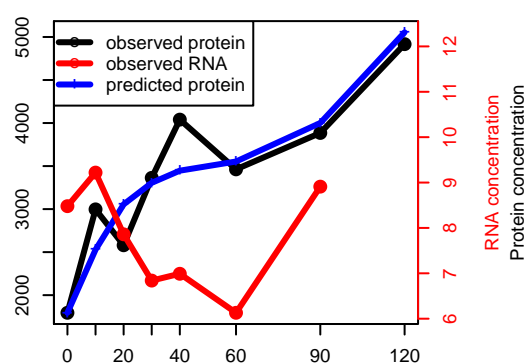

Time (min)  
ks = 14.6134726414544 kd = 0.0258421992490942

SSA4

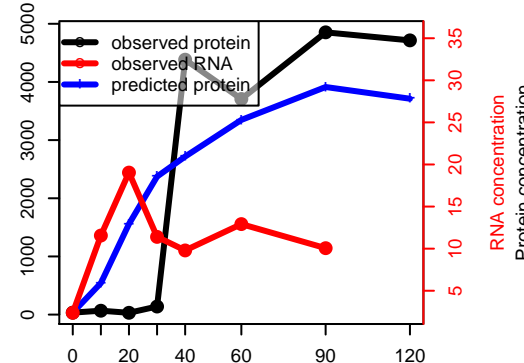

Time (min)  
ks = 7.94302717467011 kd = 0.0195078583273274

GLN1

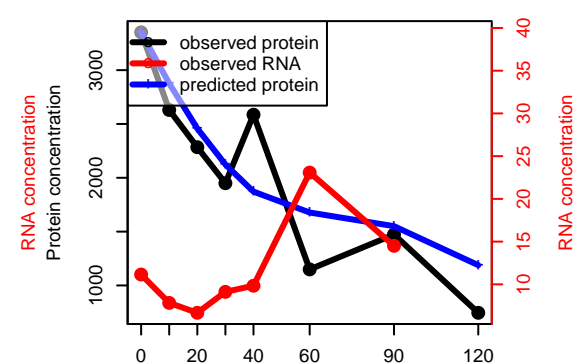

Time (min)  
ks = 1.50243571987893 kd = 0.0198387816658619

VMA2

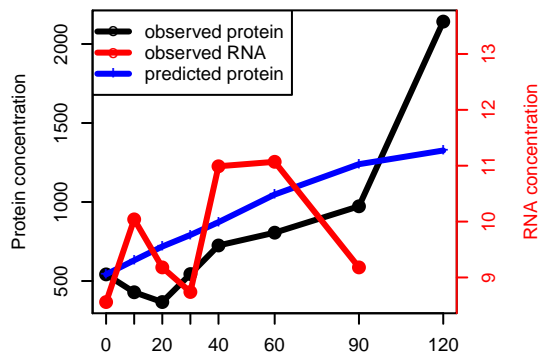

Time (min)  
ks = 1.37537836303175 kd = 0.0066540000053753

SCW4

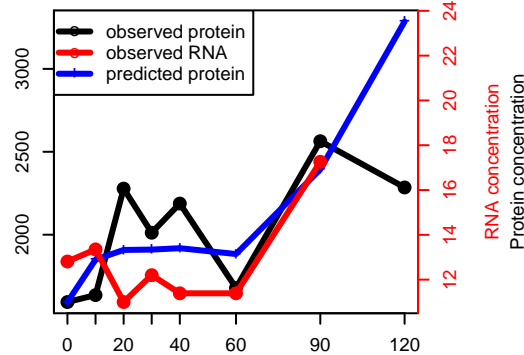

Time (min)  
ks = 10.0803826838142 kd = 0.0614479919555161

GSH2

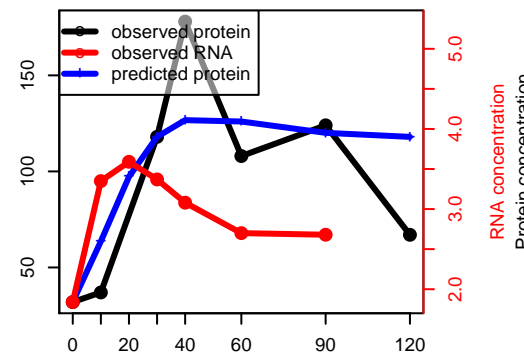

Time (min)  
ks = 2.0662864815421 kd = 0.0472891752758461

PRE4

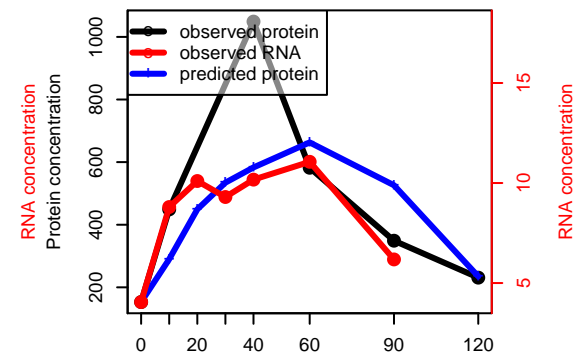

Time (min)  
ks = 4.36411148144918 kd = 0.0676887655222769

LSB1

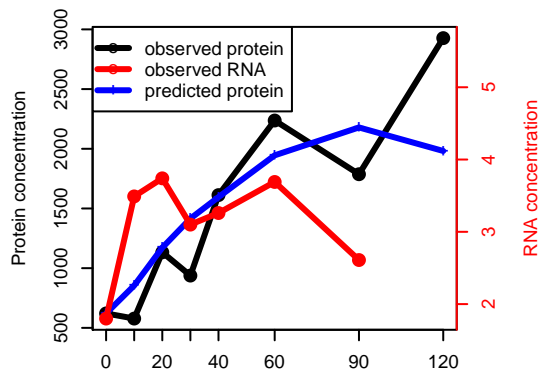

Time (min)  
ks = 13.2919379498094 kd = 0.0162979990808298

ARG1

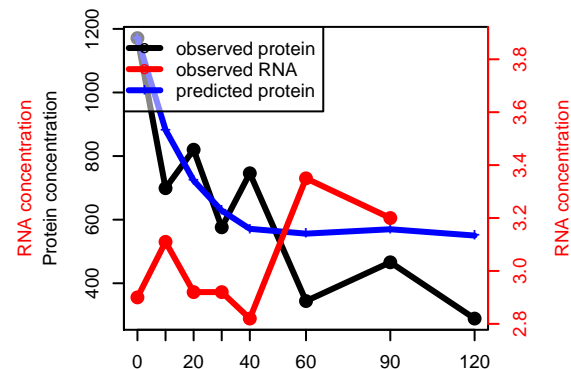

Time (min)  
ks = 10.4740527738995 kd = 0.0596726199669798

RPL13B

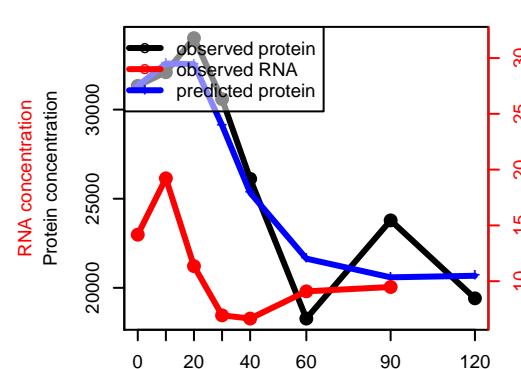

Time (min)  
ks = 64.7949741210362 kd = 0.0301187147442001

APE2

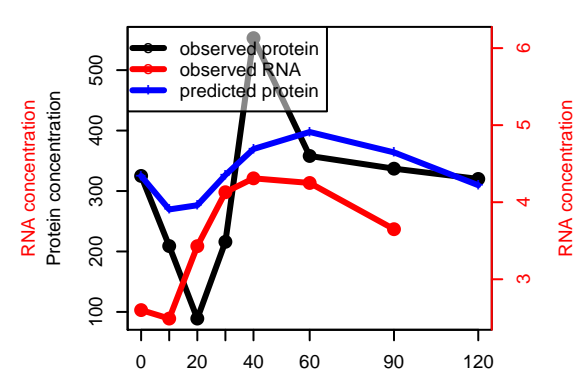

Time (min)  
ks = 8.81260394829035 kd = 0.0952043791244359

ADH6

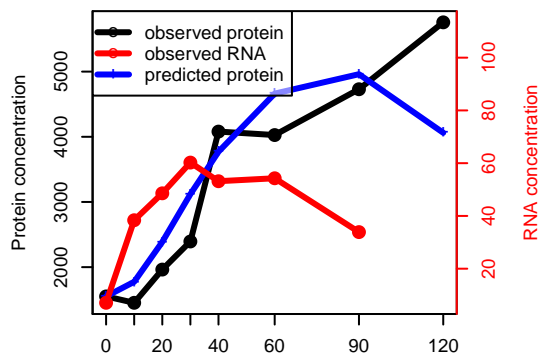

Time (min)  
ks = 2.26865667454028 kd = 0.0180841227173852

TAL1

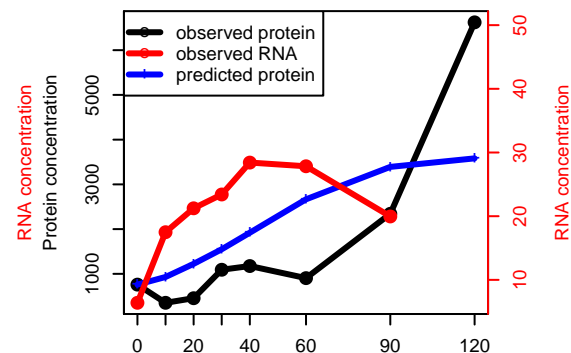

Time (min)  
ks = 1.88495909913889 kd = 0.0066540000053753

KAR2

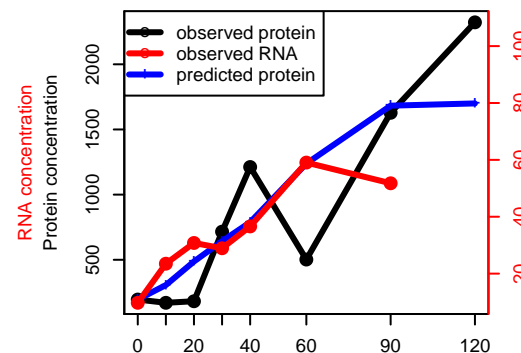

Time (min)  
ks = 1.11545441307696 kd = 0.0309090382030836

RPS13

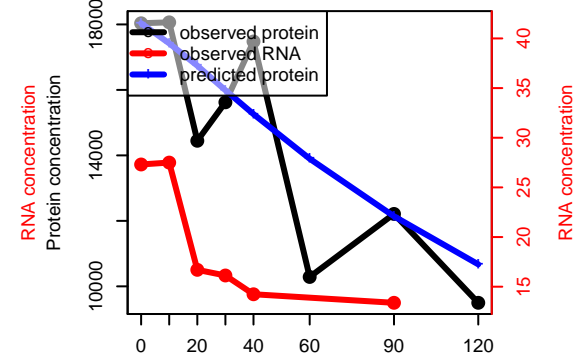

Time (min)  
ks = 2.0580773449881 kd = 0.0066540000053753

RPL30

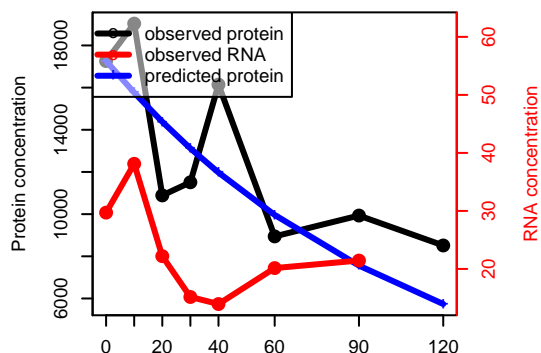

Time (min)  
ks = 0 kd = 0.00919763268032454

RPS7B

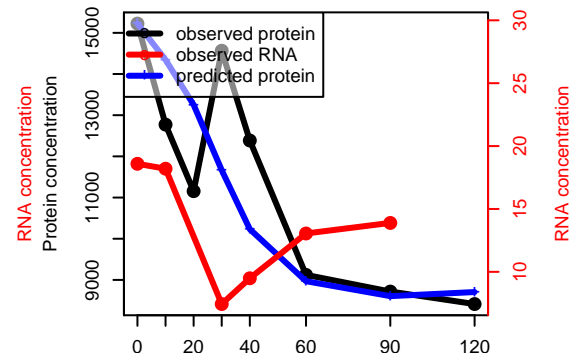

Time (min)  
ks = 15.3621044987799 kd = 0.0250898478553859

RPS7A

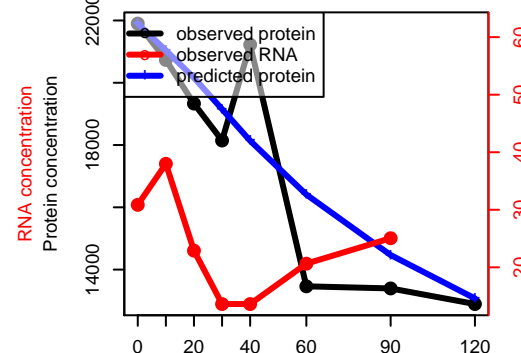

Time (min)  
ks = 1.64145209492678 kd = 0.0066540000053753

ABP1

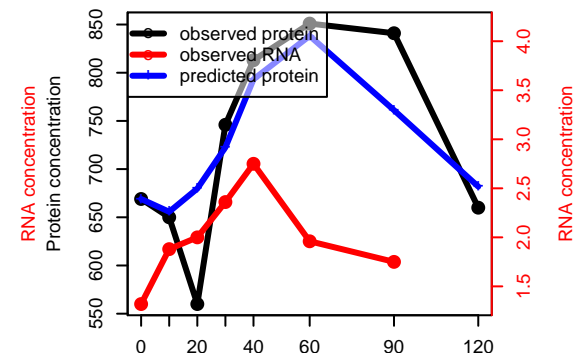

Time (min)  
ks = 11.8859245558914 kd = 0.0309633893286921

GUK1

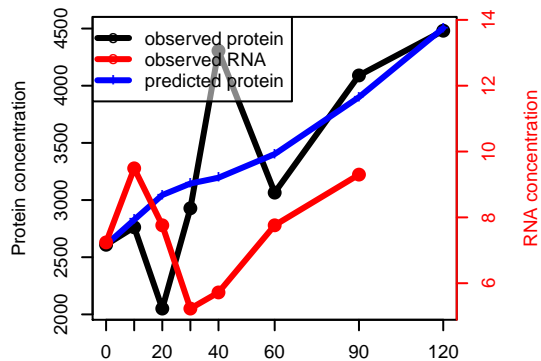

Time (min)  
ks = 4.76670854732321 kd = 0.0066540000053753

FAS1

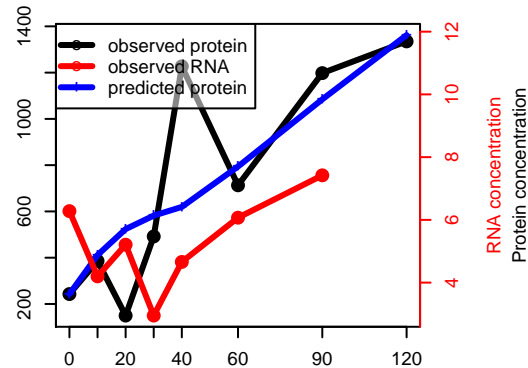

Time (min)  
ks = 4.78599951278717 kd = 0.0242880267652067

MLP1

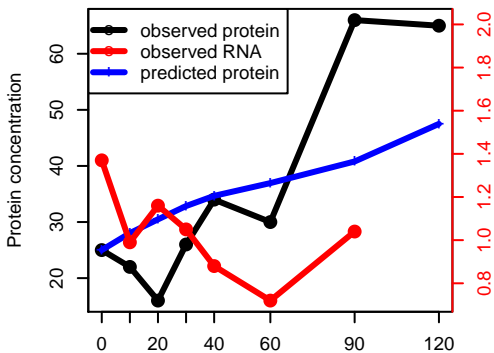

Time (min)  
ks = 0.407038743997255 kd = 0.0066540000053753

HYR1

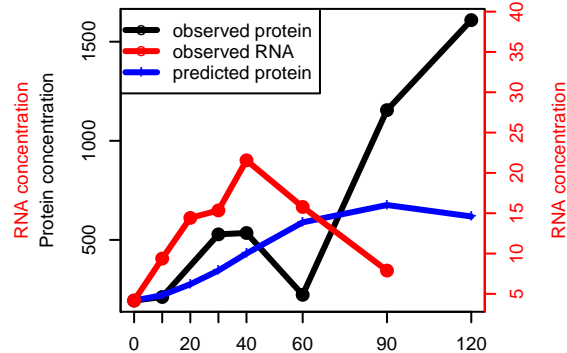

Time (min)  
ks = 0.60254863552925 kd = 0.0066540000053753

OLA1

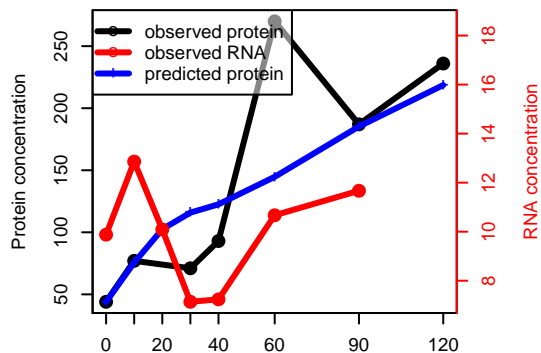

Time (min)  
ks = 0.363881609379486 kd = 0.0164621921839553

PIL1

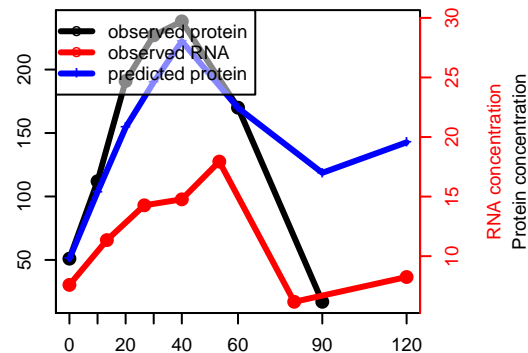

Time (min)  
ks = 1.22516299407335 kd = 0.0823418973160218

IRC5

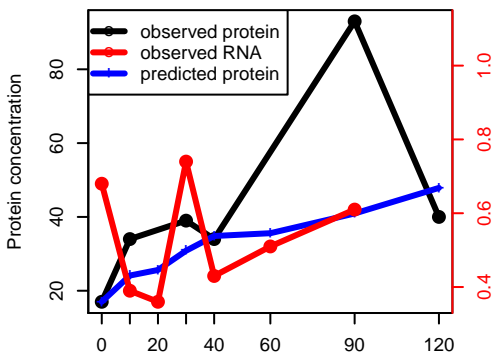

Time (min)  
ks = 2.73460122238642 kd = 0.0350941344323056

RPL8B

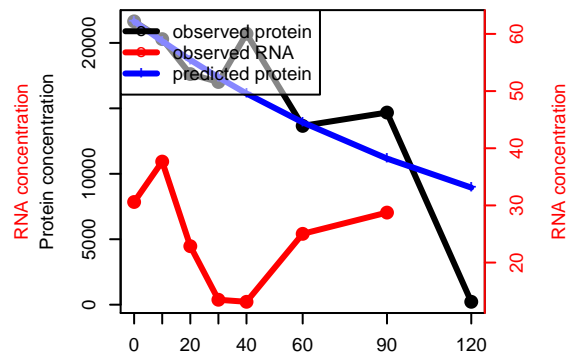

Time (min)  
ks = 0 kd = 0.00737795694641416

POL30

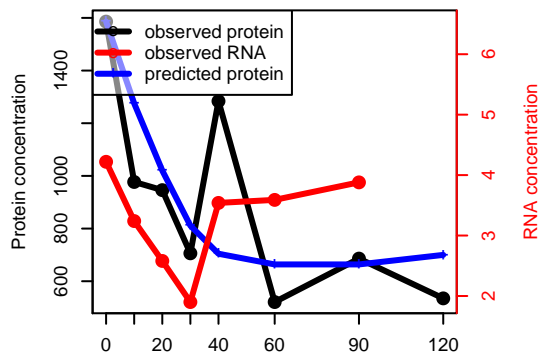

Time (min)  
ks = 7.15986385353266 kd = 0.0404940204196426

THR4

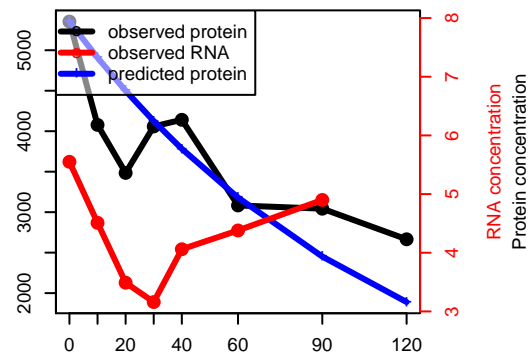

Time (min)  
ks = 0 kd = 0.00867882575042792

HIS3

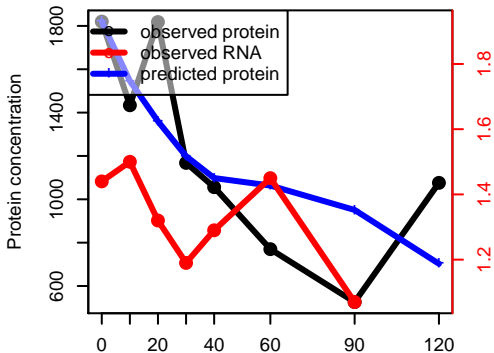

Time (min)  
ks = 37.5521885295461 kd = 0.0493958885280452

RPL22A

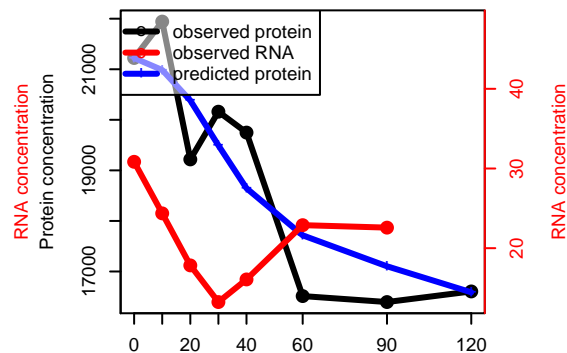

Time (min)  
ks = 6.16323534936979 kd = 0.00919677550835561

RPS24A

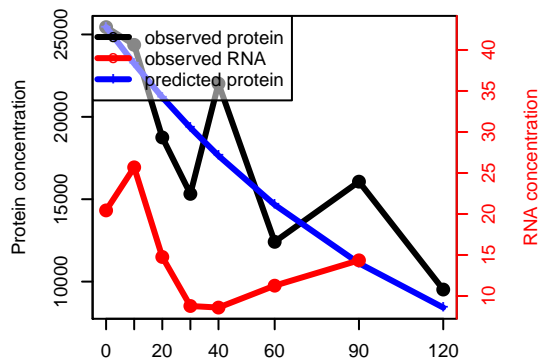

Time (min)  
ks = 0 kd = 0.00923678485436256

ARO2

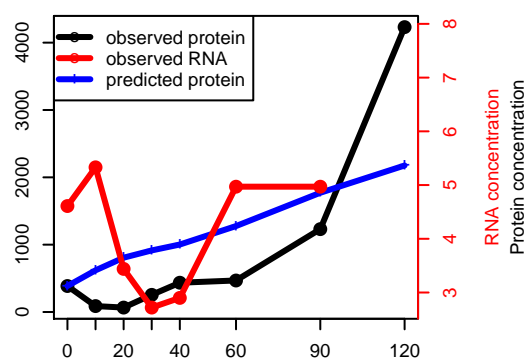

Time (min)  
ks = 5.35677196851163 kd = 0.0066540000053753

PDC1

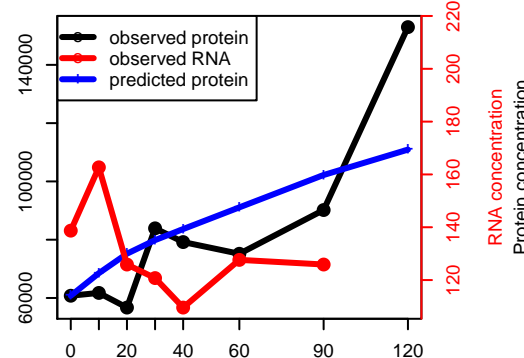

Time (min)  
ks = 7.95741094023056 kd = 0.0066540000053753

RPN12

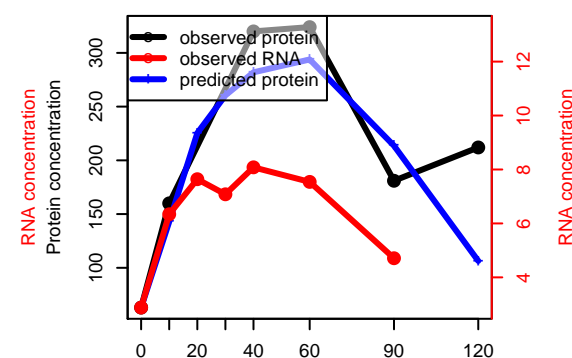

Time (min)  
ks = 3.90569031441971 kd = 0.101848502355726

TSR1

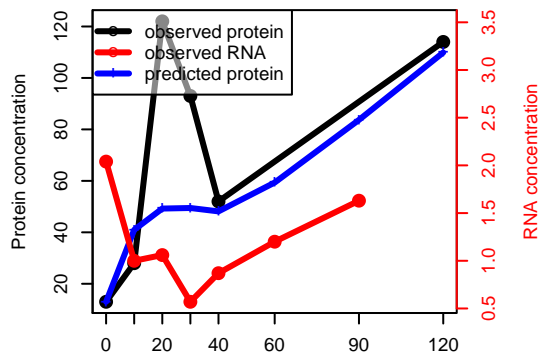

Time (min)  
ks = 2.70217635009955 kd = 0.0431907659654131

NDI1

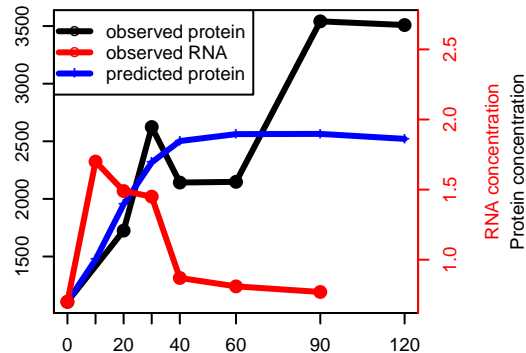

Time (min)  
ks = 44.640428032872 kd = 0.013474770056504

NUP2

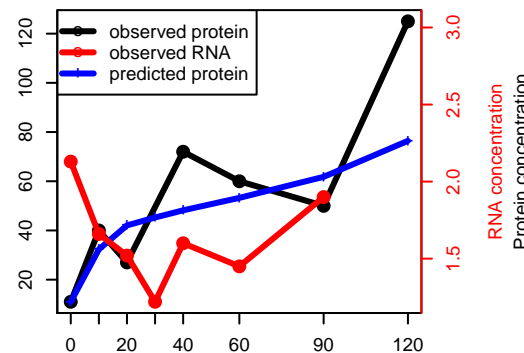

Time (min)  
ks = 1.66608600737898 kd = 0.0444700332880967

DED1

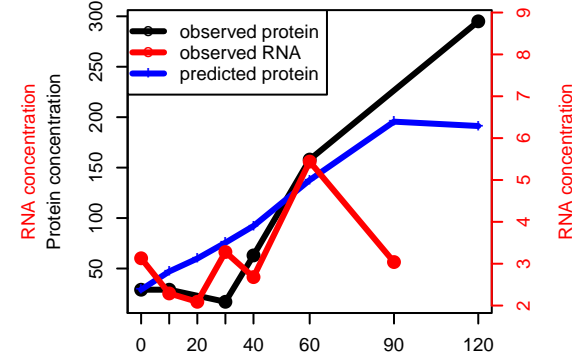

Time (min)  
ks = 0.779493759327496 kd = 0.00798501607515384

TRR1

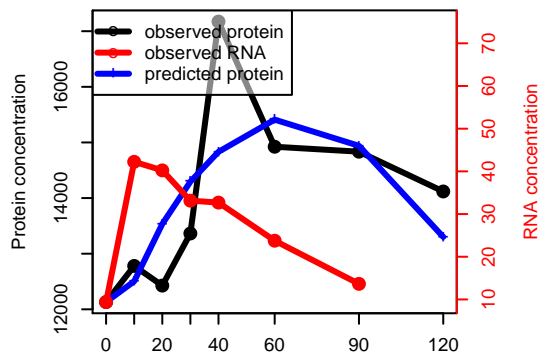

Time (min)  
ks = 4.60336803084122 kd = 0.0066540000053753

AHP1

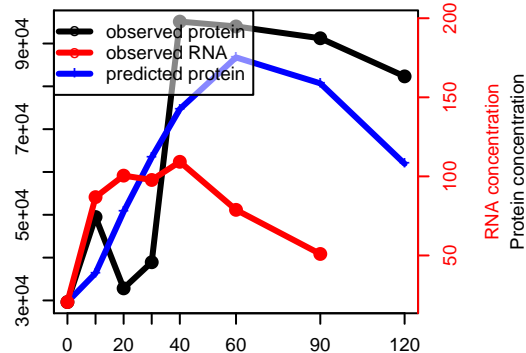

Time (min)  
ks = 25.5574781616066 kd = 0.0219972017043615

YMR090W

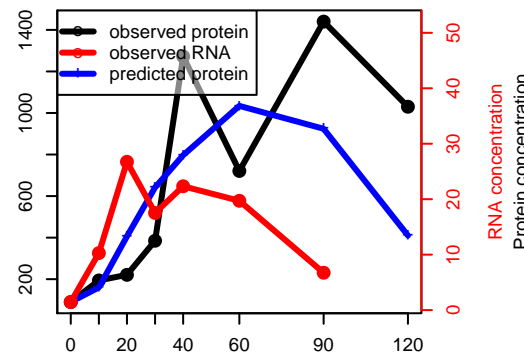

Time (min)  
ks = 1.68632202860812 kd = 0.0249959357125223

GRE2

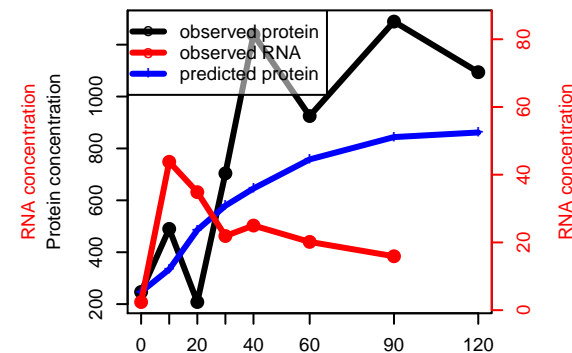

Time (min)  
ks = 0.456020924561799 kd = 0.0066540000053753

GRE3

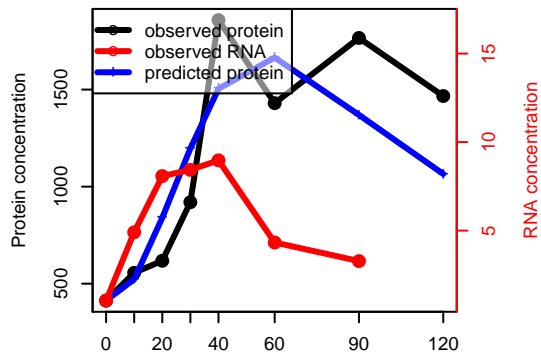

Time (min)  
ks = 7.4407622023491 kd = 0.0250505869639952

YDL124W

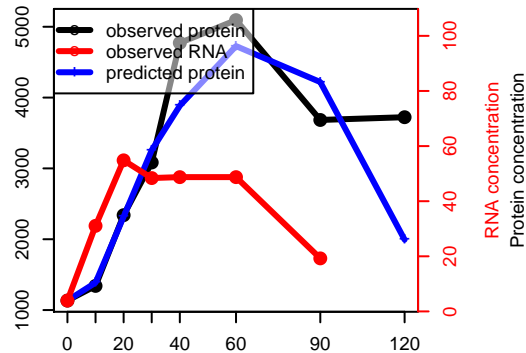

Time (min)  
ks = 3.33875039773688 kd = 0.0277323513006611

ADE16

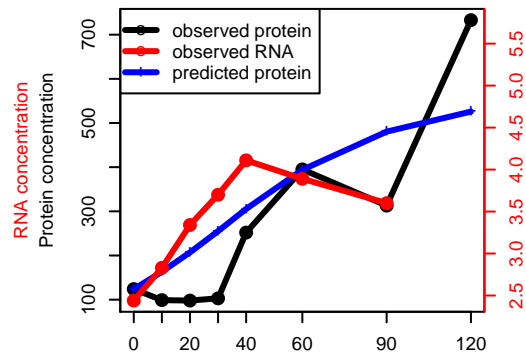

Time (min)  
ks = 2.10964423916531 kd = 0.0114626428590479

IMD4

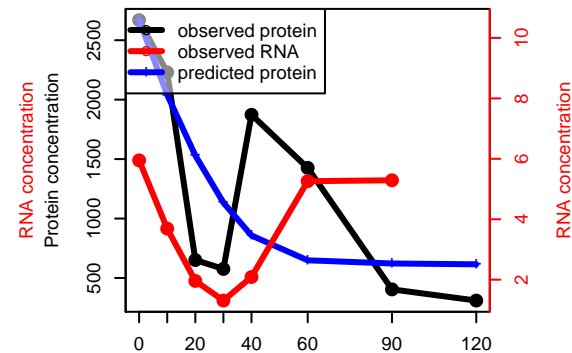

Time (min)  
ks = 4.02269681876249 kd = 0.0350726279358391

RPS9B

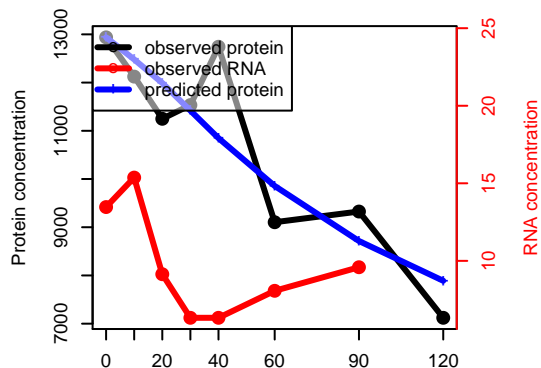

Time (min)  
ks = 2.67873518126185 kd = 0.0066540000053753

RPS4B

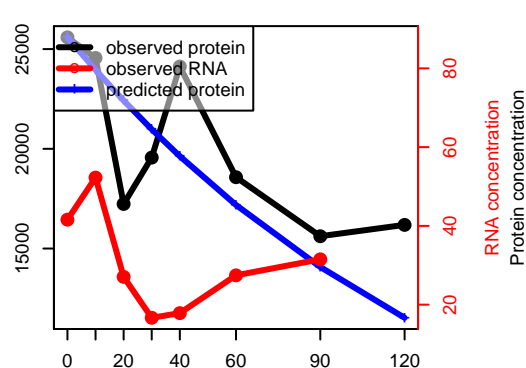

Time (min)  
ks = 0 kd = 0.0066540000053753

RPS17B

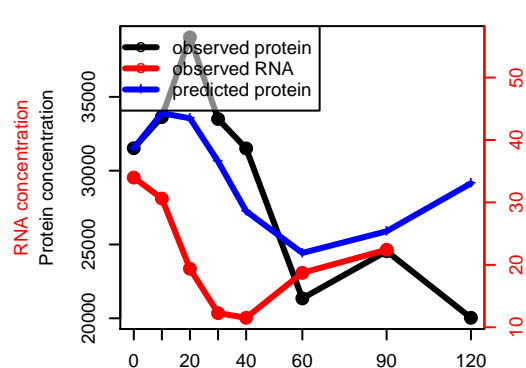

Time (min)  
ks = 32.8719492565356 kd = 0.0251382947491976

RPL19B

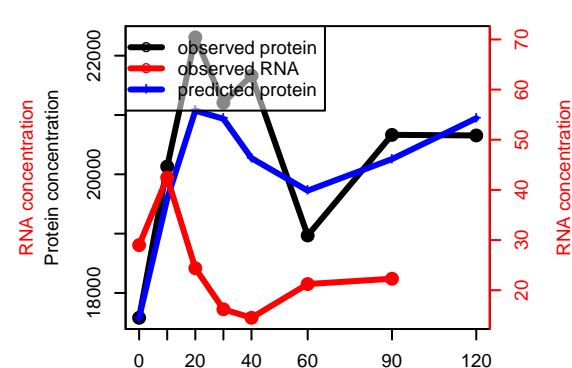

Time (min)  
ks = 11.8545209344807 kd = 0.0120407496725611

RPS20

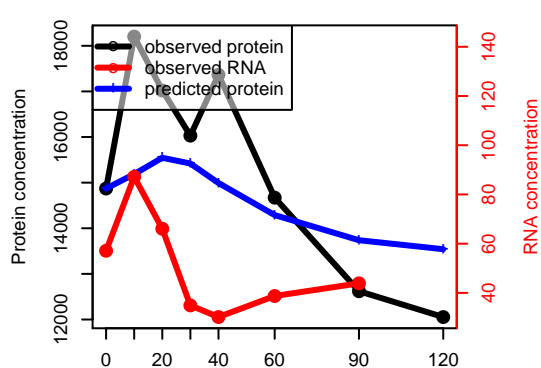

Time (min)  
ks = 1.81308139155659 kd = 0.0066540000053753

PDI1

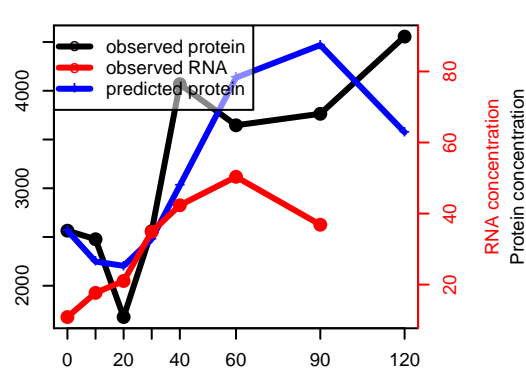

Time (min)  
ks = 4.16455920454971 kd = 0.0383589017758066

FSH1

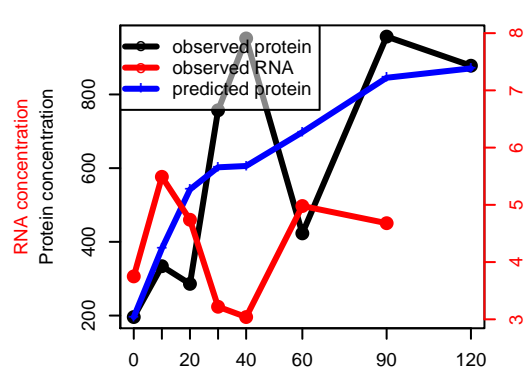

Time (min)  
ks = 5.86989250687683 kd = 0.0298740826301258

PFK1

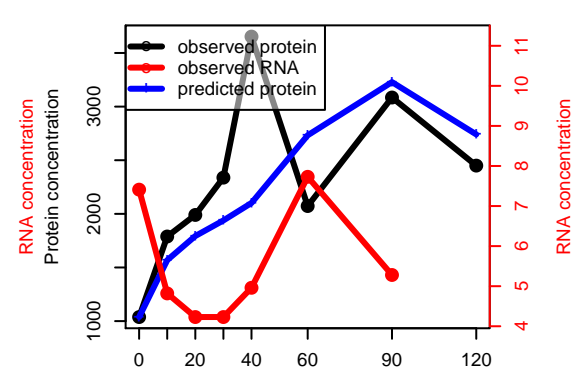

Time (min)  
ks = 13.9203508833985 kd = 0.0239169876825506



RIB3

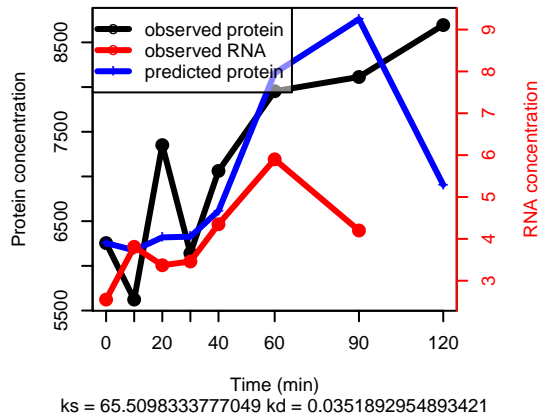

RFT1

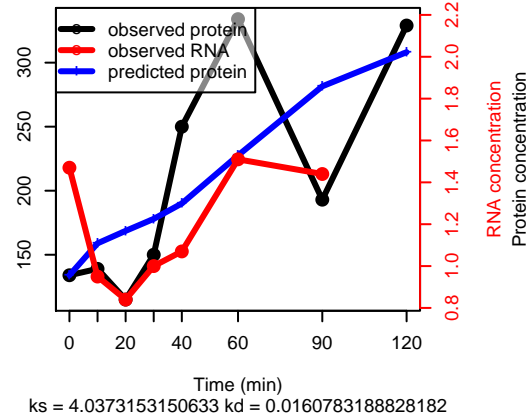

CCS1

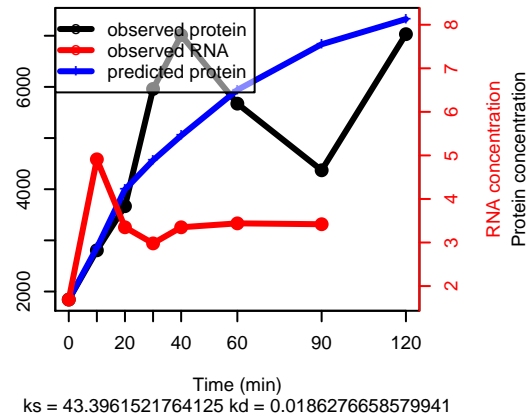

SSC1

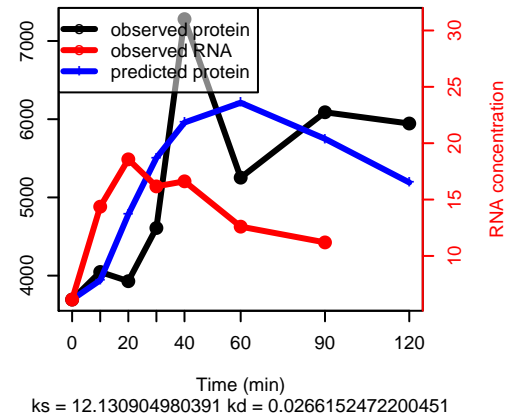

RPL31A

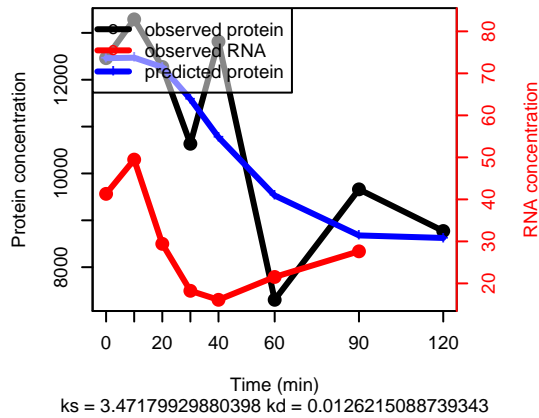

RPL25

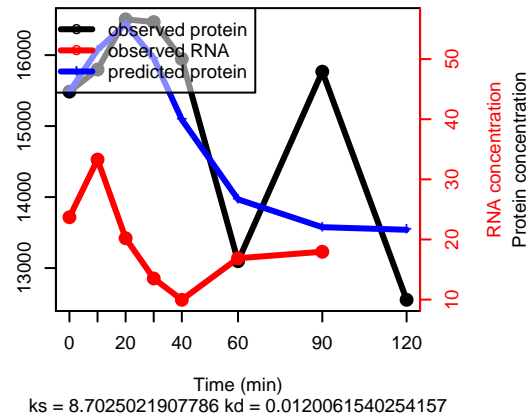

RPL14A

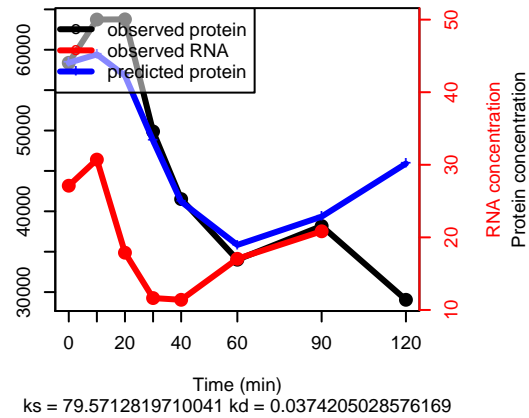

RPL15A

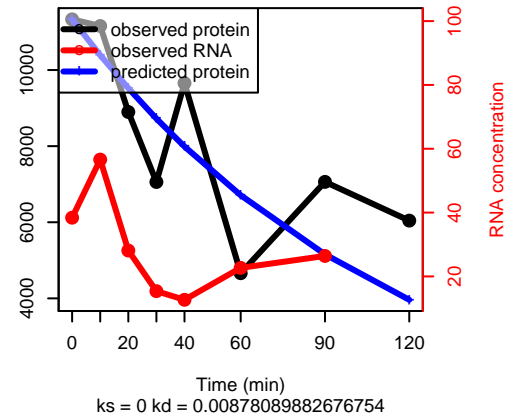

CDC60

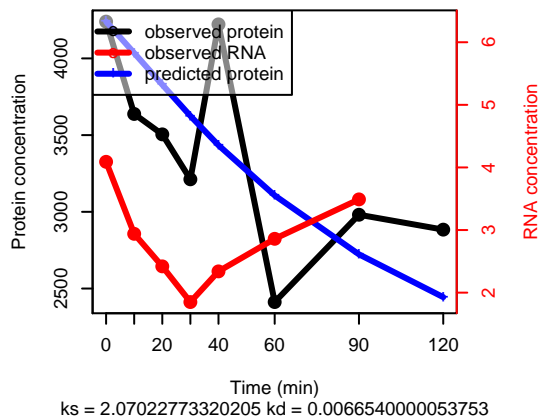

LAT1

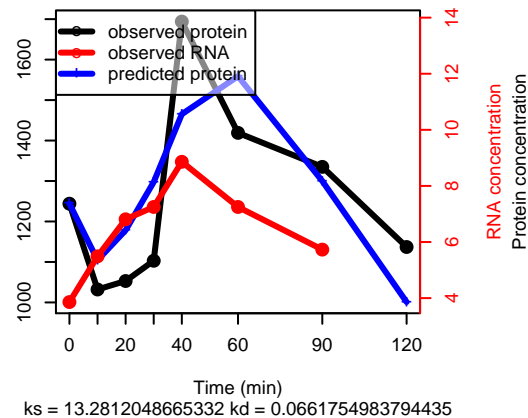

HXK1

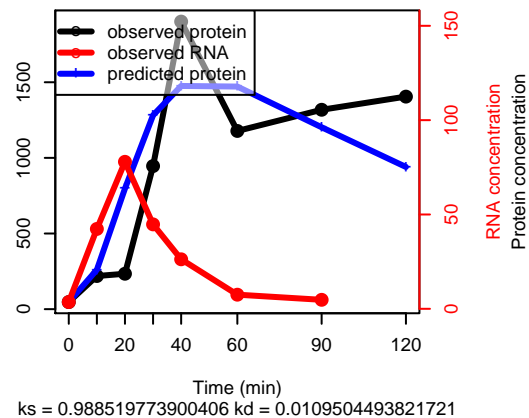

HTS1

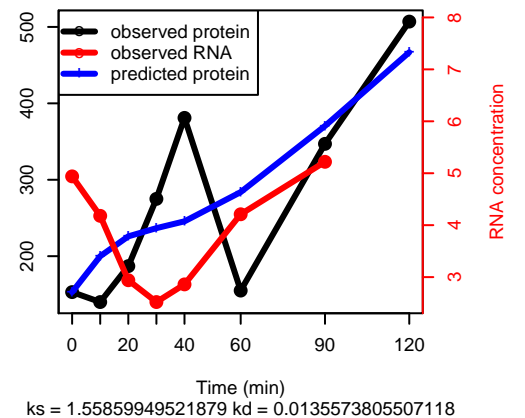



ASN2

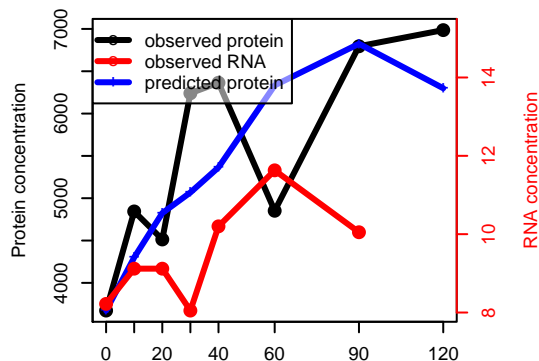

Time (min)  
ks = 23.9992712922093 kd = 0.0364509786510197

LSM6

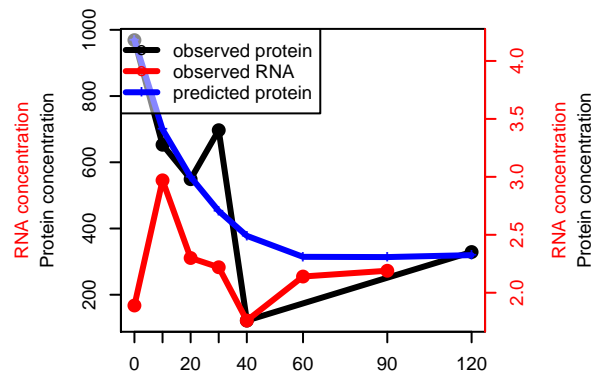

Time (min)  
ks = 8.36165418383557 kd = 0.0580727130594046

TAF10

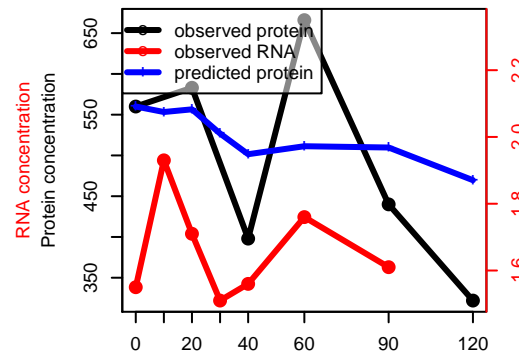

Time (min)  
ks = 19.9739144130987 kd = 0.0644401378715201

MRP8

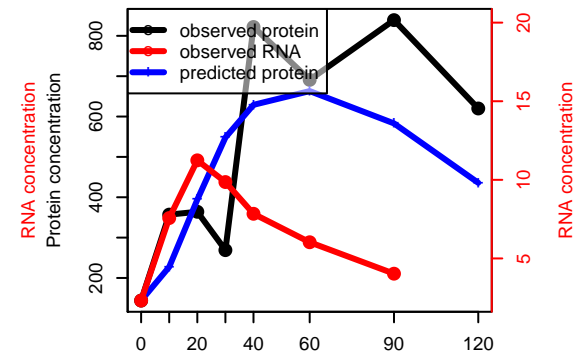

Time (min)  
ks = 2.56419936362581 kd = 0.024579065406332

GOR1

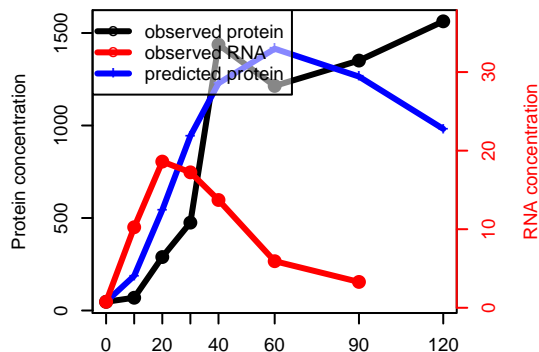

Time (min)  
ks = 2.77984220752171 kd = 0.0132382485786783

HTA2

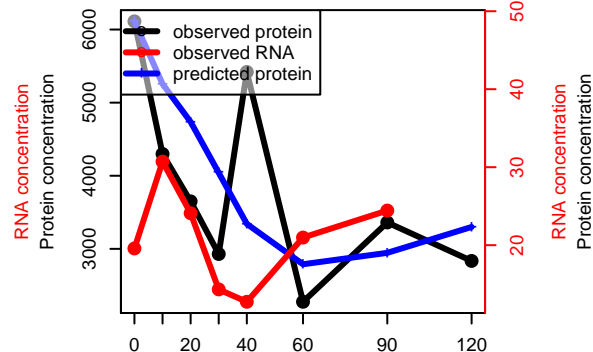

Time (min)  
ks = 4.84236403364073 kd = 0.0369010615727595

GLY1

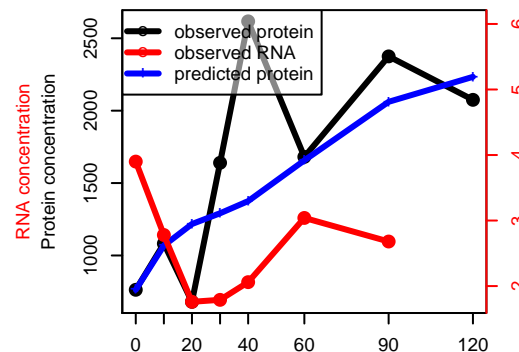

Time (min)  
ks = 12.3359752151443 kd = 0.0115648252971398

RPL33B

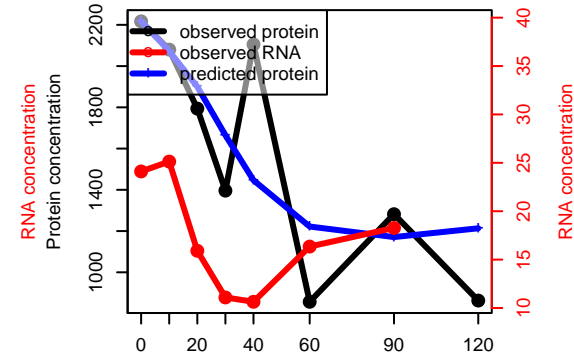

Time (min)  
ks = 1.6562075499635 kd = 0.0257570502033992

RPL33A

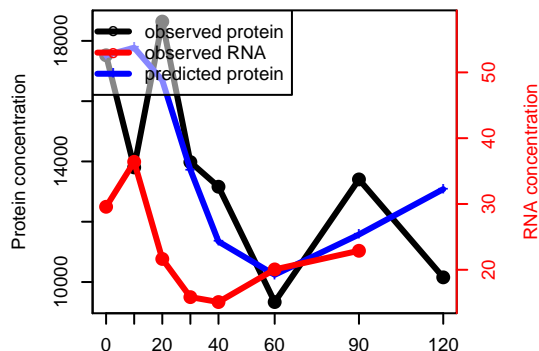

Time (min)  
ks = 31.8978098272007 kd = 0.0587494481088939

RPS12

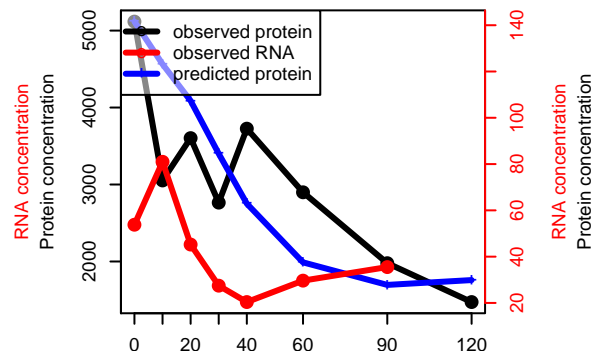

Time (min)  
ks = 1.54052658570061 kd = 0.033176780319461

RPL6A

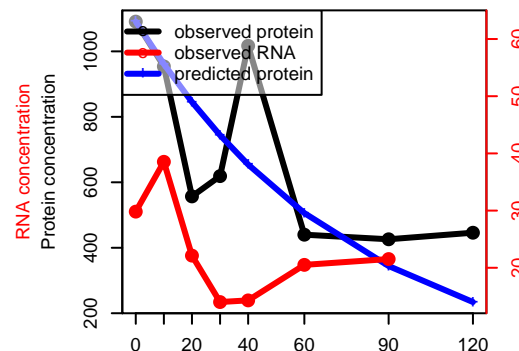

Time (min)  
ks = 0 kd = 0.0128456992322306

ZUO1

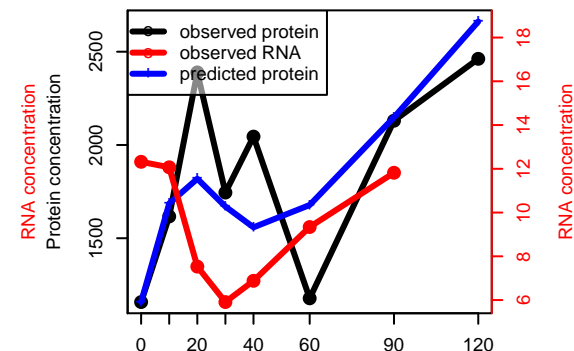

Time (min)  
ks = 9.77999366001092 kd = 0.0460163707977476

NPC2

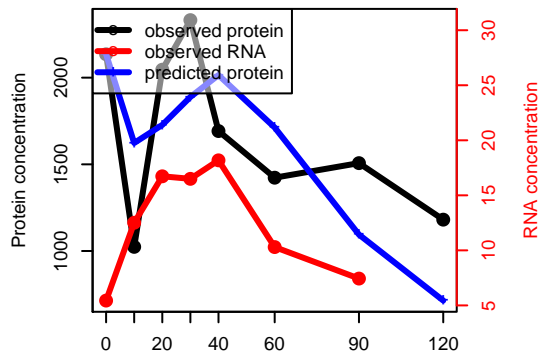

Time (min)  
ks = 9.03802675196443 kd = 0.0736101526729967

GPM1

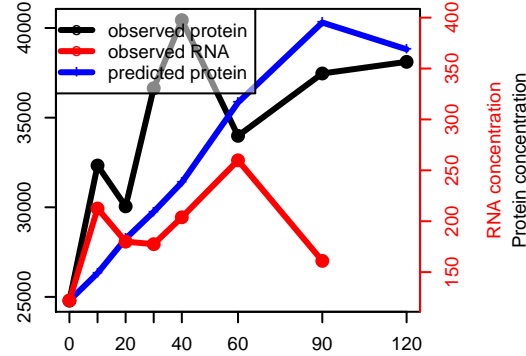

Time (min)  
ks = 1.9164323214985 kd = 0.006654000053753

YGR130C

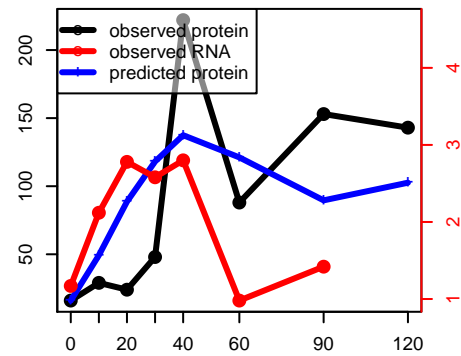

Time (min)  
ks = 2.92209857538478 kd = 0.0467109026428433

PSA1

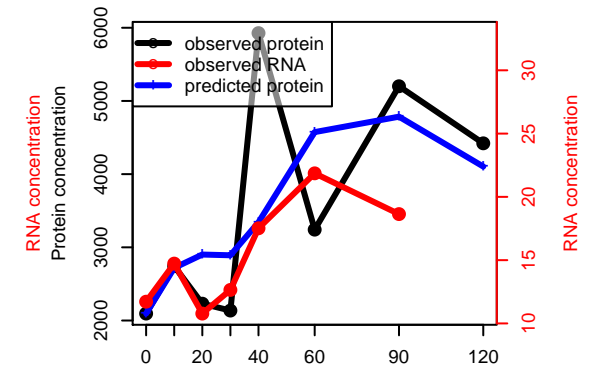

Time (min)  
ks = 18.1738163665631 kd = 0.0741557303396901

ATP16

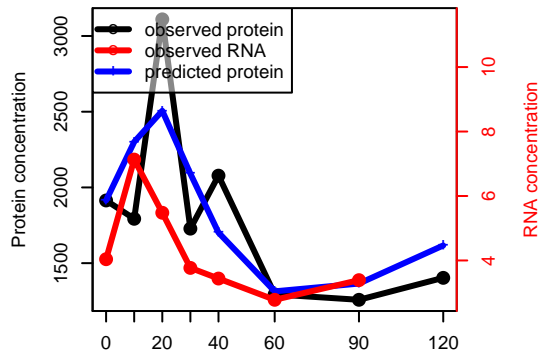

Time (min)  
ks = 47.5673514068945 kd = 0.112268423647875

MLH1

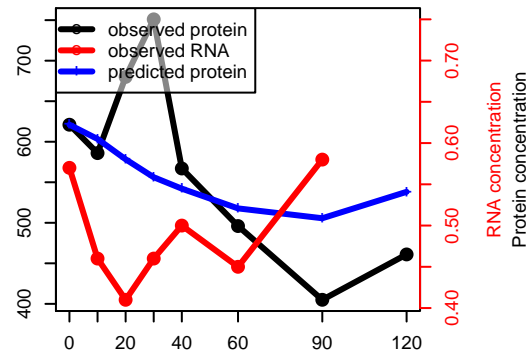

Time (min)  
ks = 12.7624986925632 kd = 0.0135934481695509

RRP4

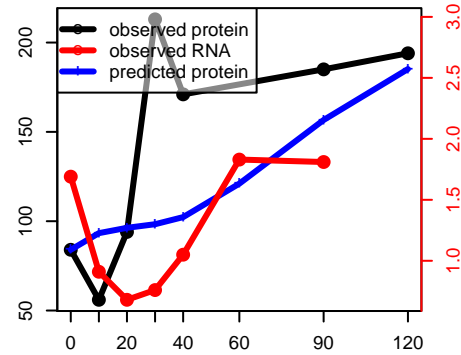

Time (min)  
ks = 1.17238437458978 kd = 0.006654000053753

SAM2

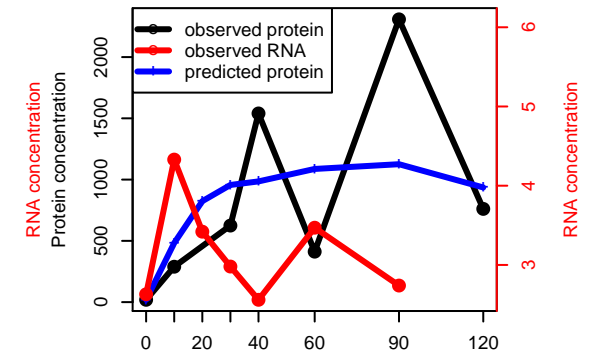

Time (min)  
ks = 16.3527080085749 kd = 0.0431844713780212

ACT1

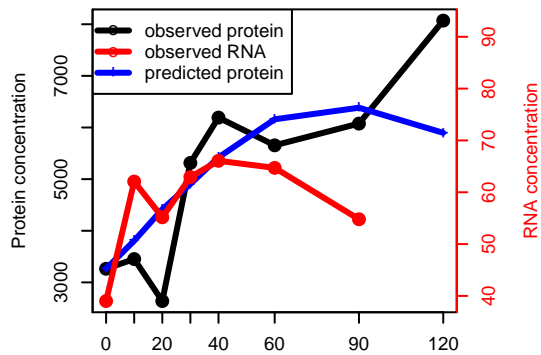

Time (min)  
ks = 2.84196132634293 kd = 0.0255344925132225

MRT4

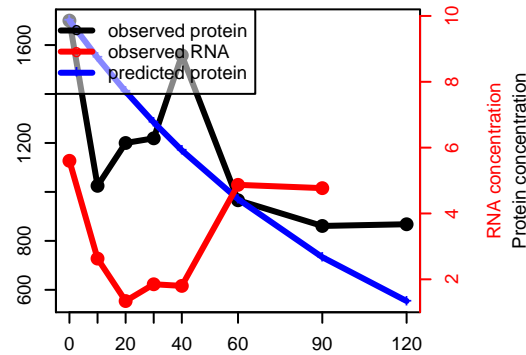

Time (min)  
ks = 0 kd = 0.00934548773493227

CDC19

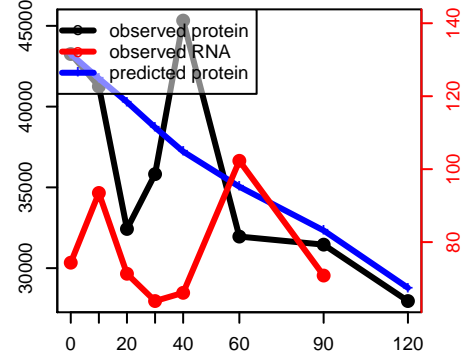

Time (min)  
ks = 1.56037492385876 kd = 0.006654000053753

URA1

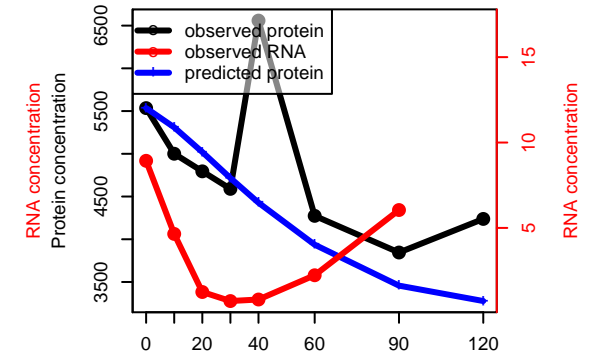

Time (min)  
ks = 2.04127225864878 kd = 0.006654000053753

RPL4A

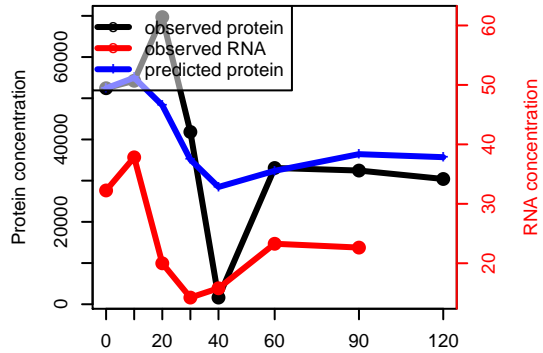

Time (min)  
ks = 150.699117977152 kd = 0.0943788375942558

THR1

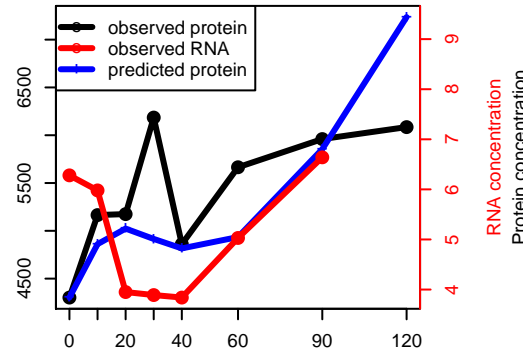

Time (min)  
ks = 26.3386700727251 kd = 0.0229624322427956

MET6

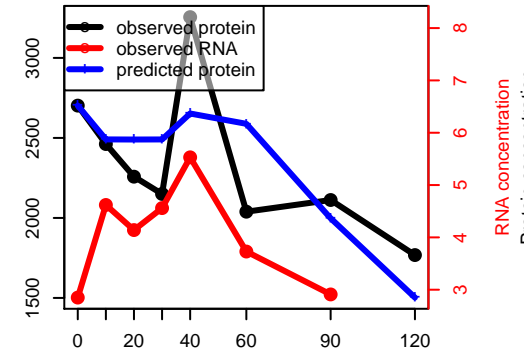

Time (min)  
ks = 29.0114554083906 kd = 0.0508135672879697

URA4

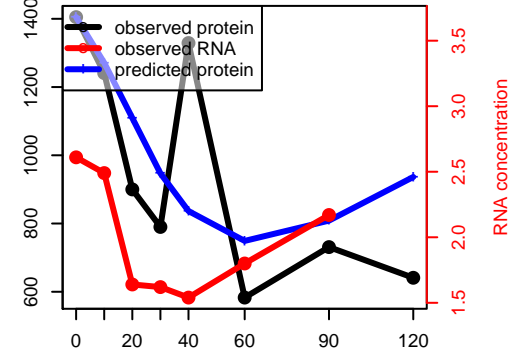

Time (min)  
ks = 18.6651988433703 kd = 0.0456633337517621

ASC1

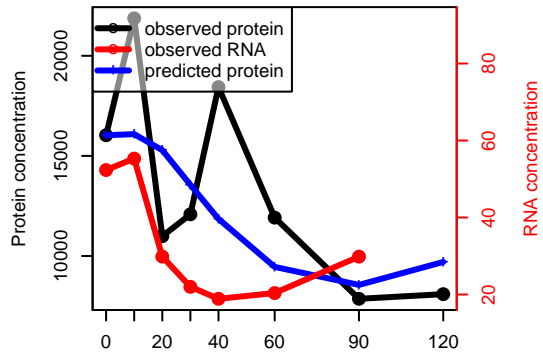

Time (min)  
ks = 7.93193347268018 kd = 0.0262831990016943

RPS2

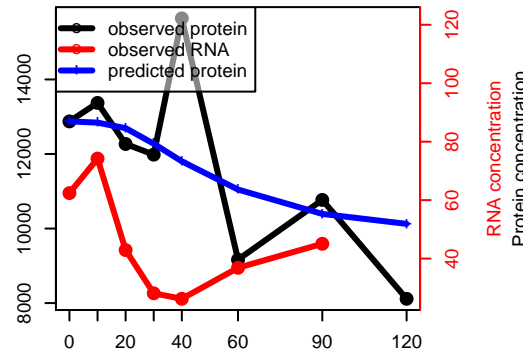

Time (min)  
ks = 1.20176864616625 kd = 0.006654000053753

ADE13

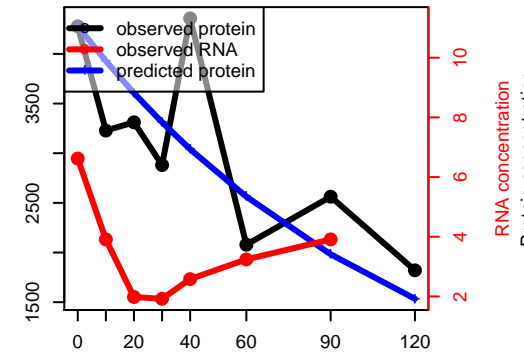

Time (min)  
ks = 0 kd = 0.00854906230156099

GEA1

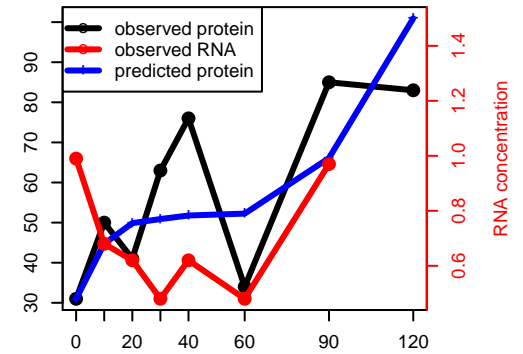

Time (min)  
ks = 3.19051096397957 kd = 0.0331316961370374

ENO1

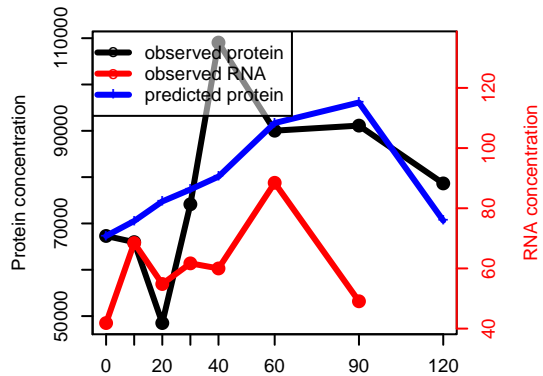

Time (min)  
ks = 31.8257617184597 kd = 0.0210276122048964

CIT1

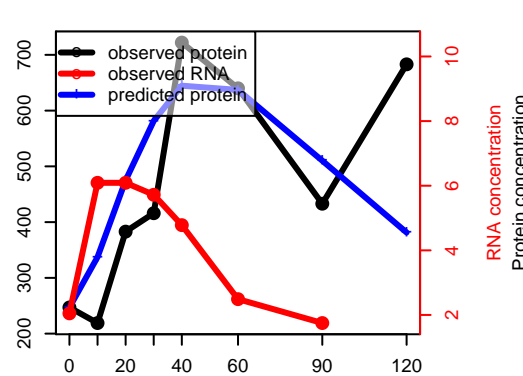

Time (min)  
ks = 3.642149614018 kd = 0.0206009758992565

HYP2

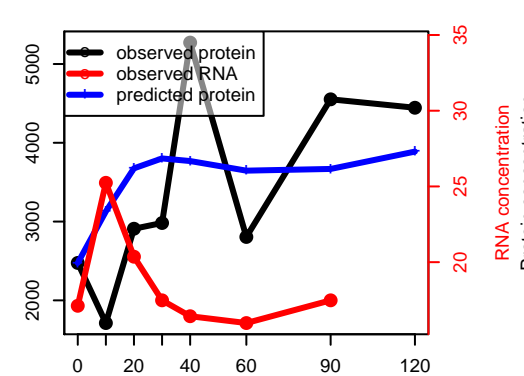

Time (min)  
ks = 7.72542601672776 kd = 0.0354441777995097

EGD1

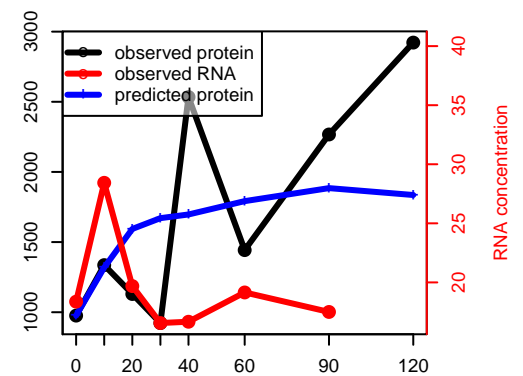

Time (min)  
ks = 2.65933860789817 kd = 0.024637208847079

GDI1

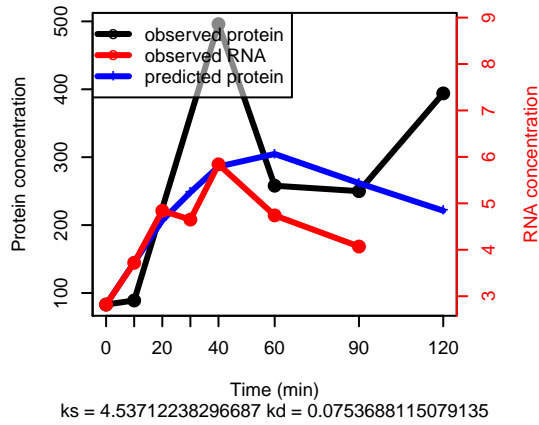

NOP58

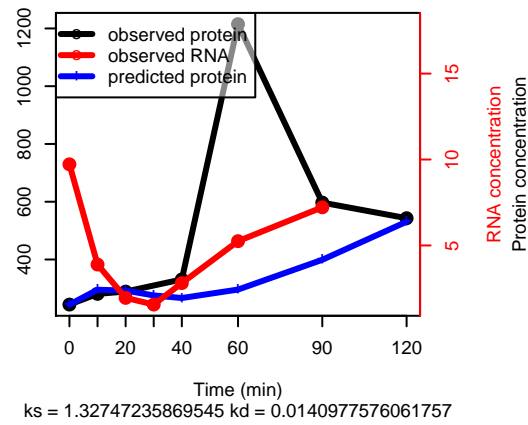

UFD4

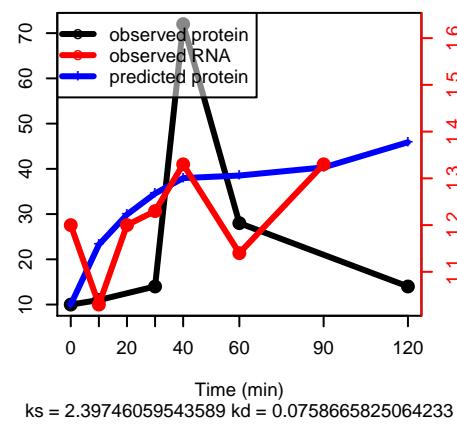

USO1

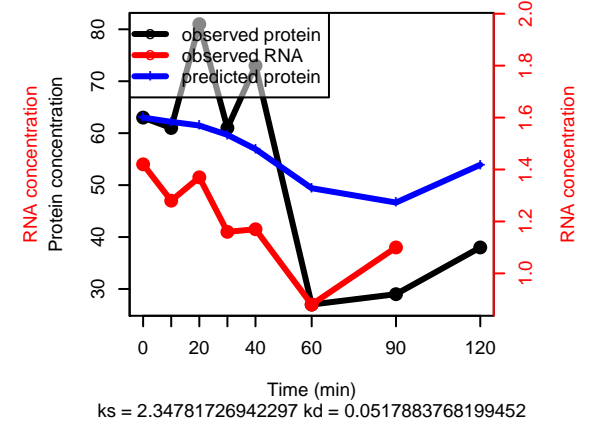

TRA1

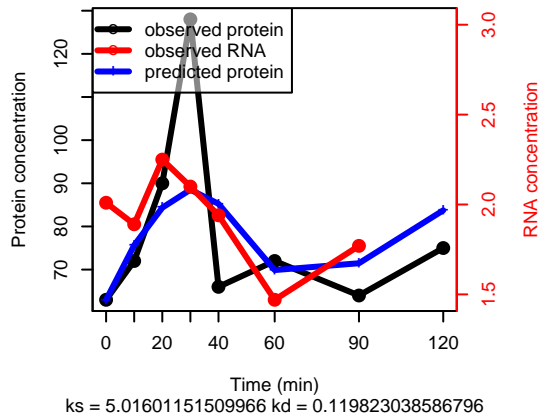

DAP1

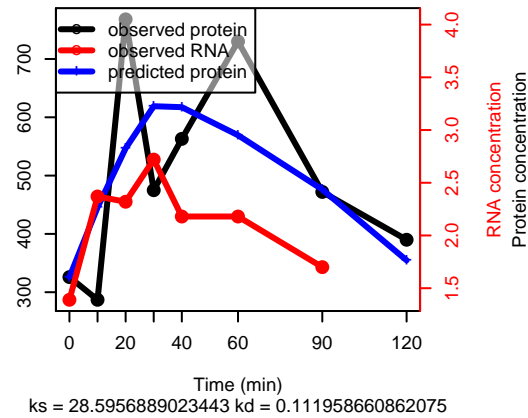

ALD4

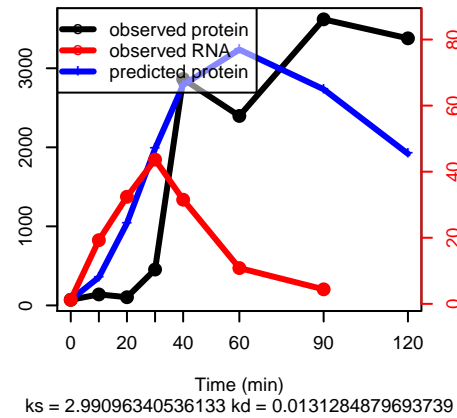

CDC48

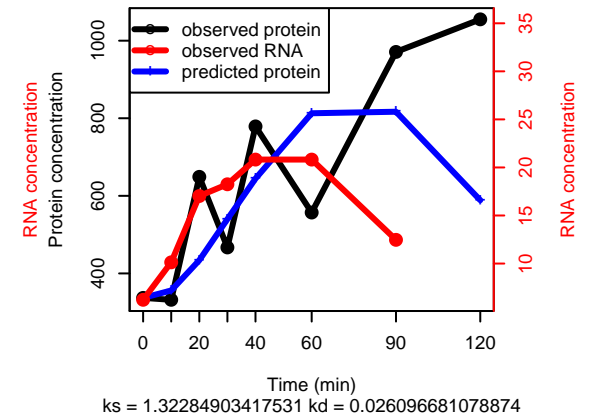

YGL242C

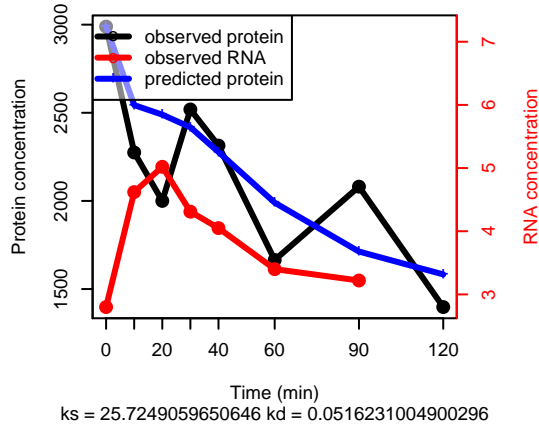

PFK2

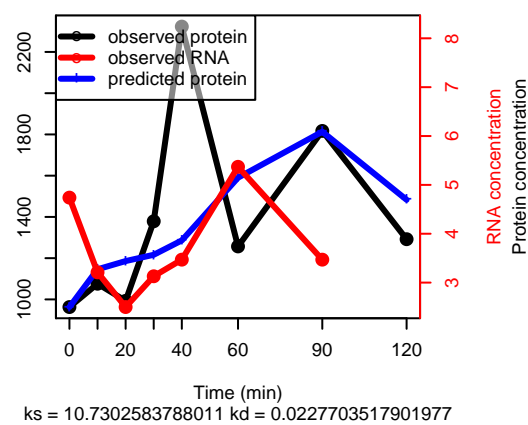

RPS11B

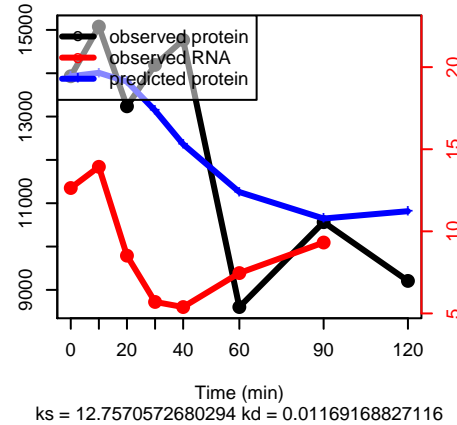

RPS16B

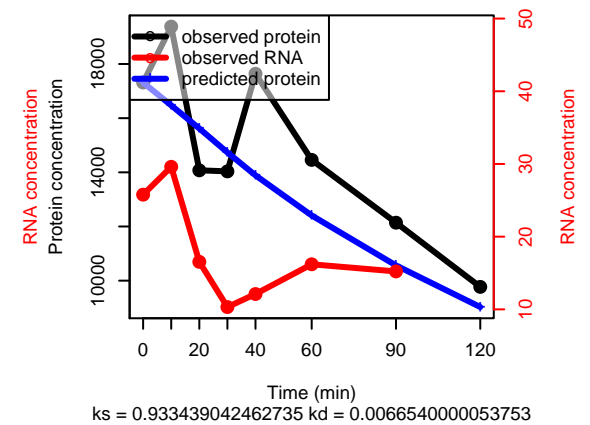

RPS8A

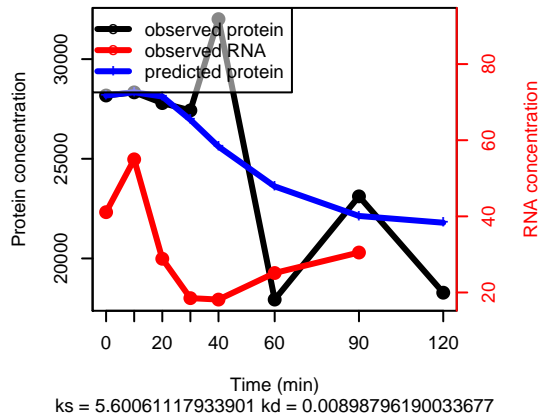

GLN4

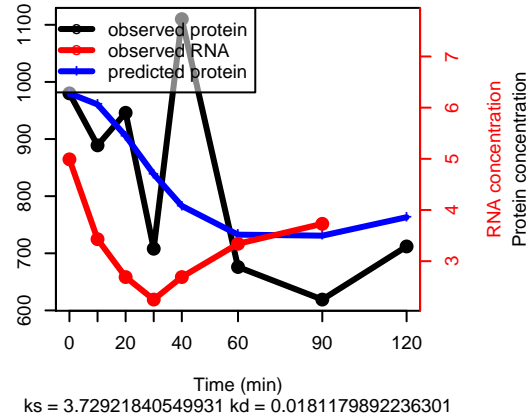

COF1

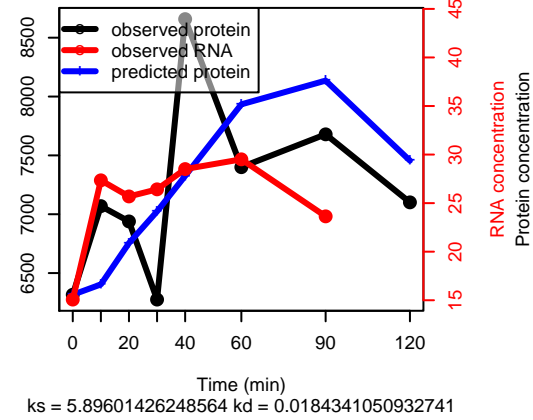

PGI1

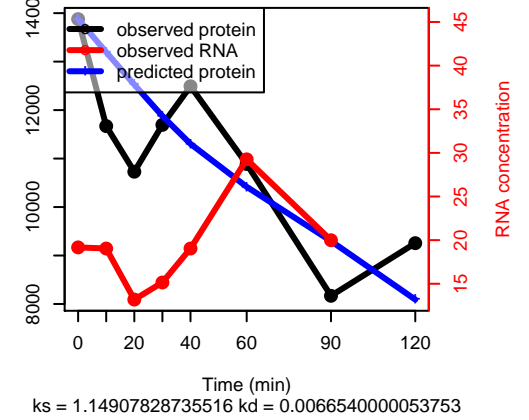

CLC1

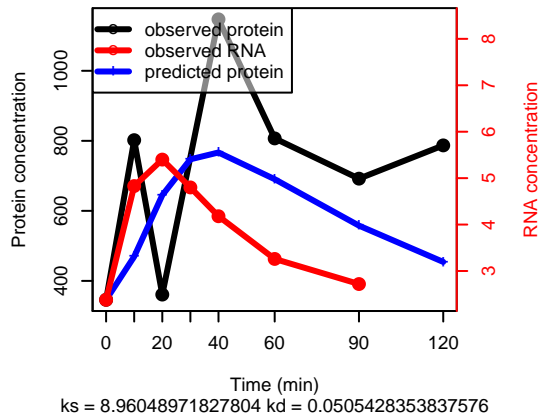

LAP4

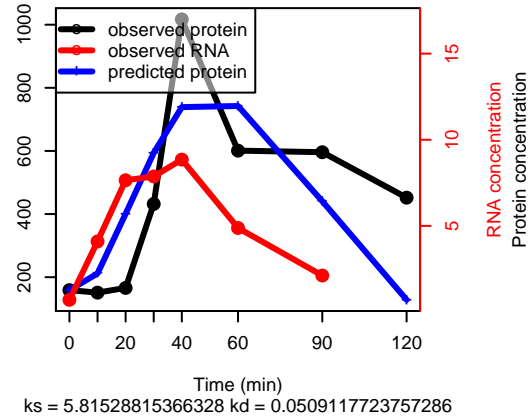

PYC1

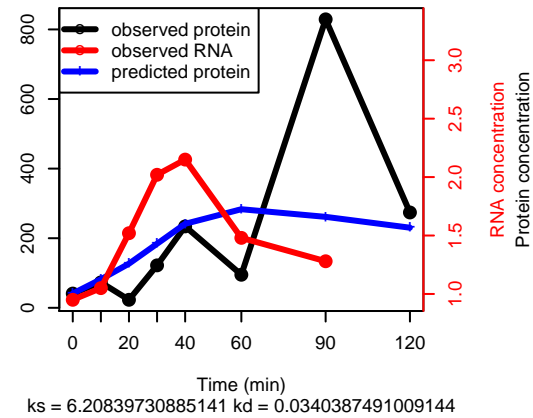

RPS1A

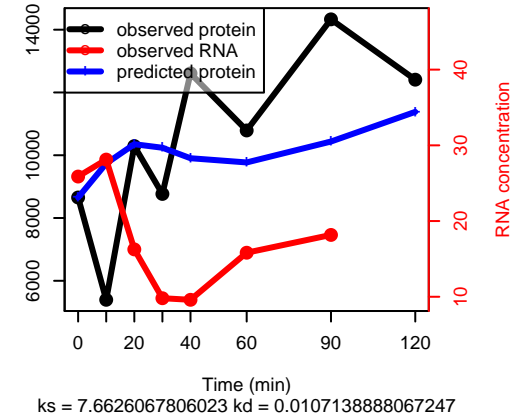

RPS5

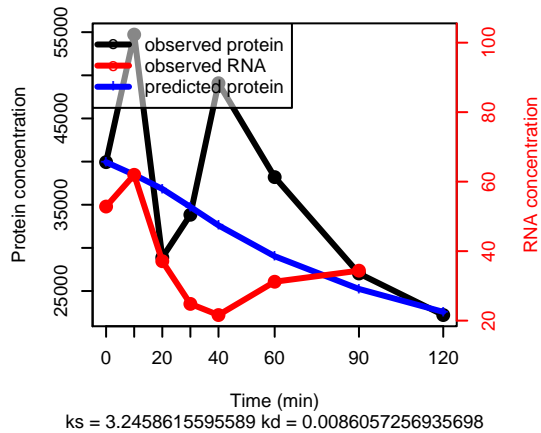

DUG1

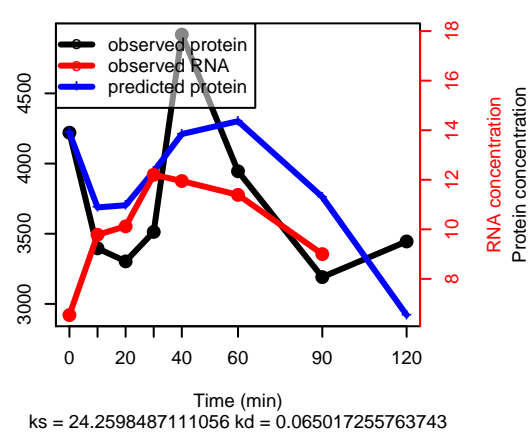

SAC6

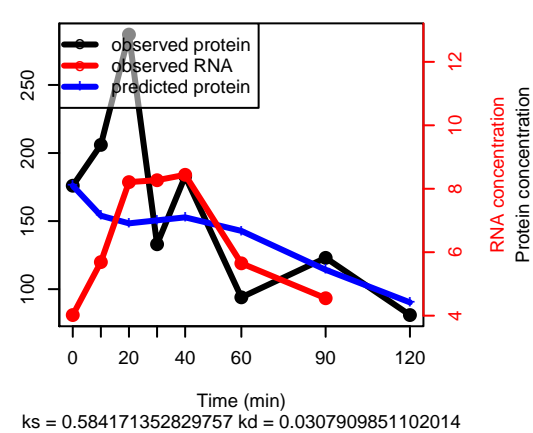

PFY1

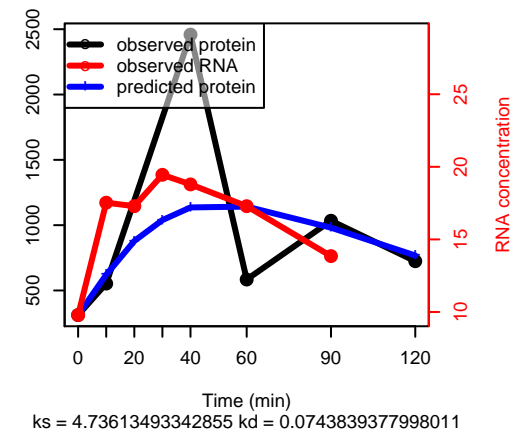

PMD1

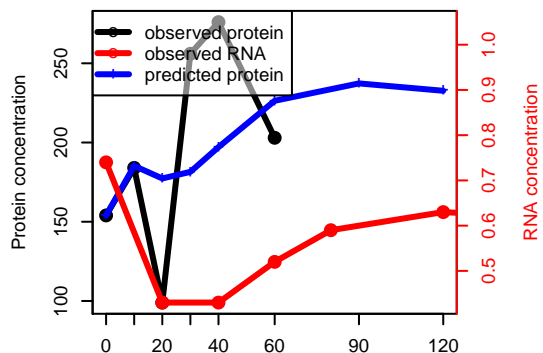

Time (min)  
ks = 23.4031085066959 kd = 0.0597098142537466

CAR2

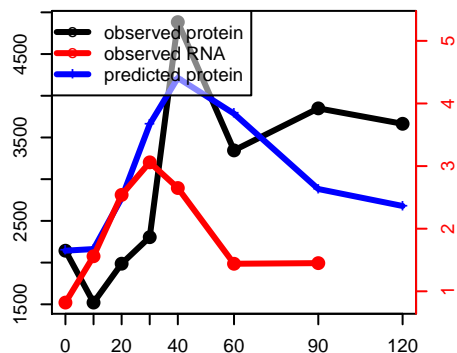

Time (min)  
ks = 86.170750171267 kd = 0.0478326840984326

RPL23A

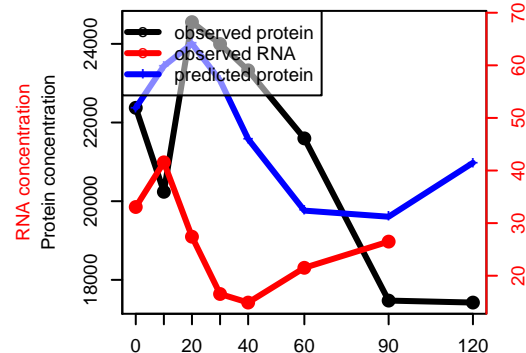

Time (min)  
ks = 12.186311303126 kd = 0.0152366158825563

RPS15

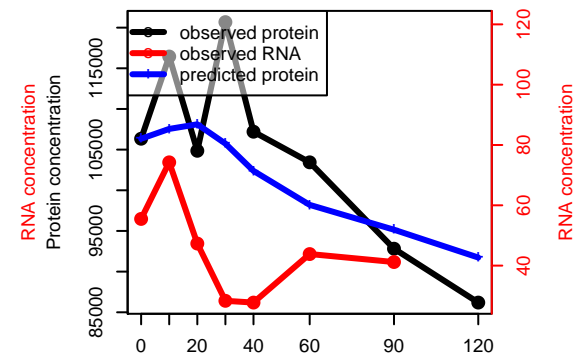

Time (min)  
ks = 12.7856320140724 kd = 0.0066540000053753

SAM4

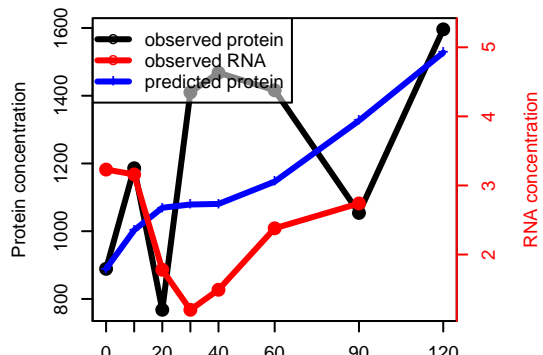

Time (min)  
ks = 5.6258104828048 kd = 0.00691917865816546

TSA1

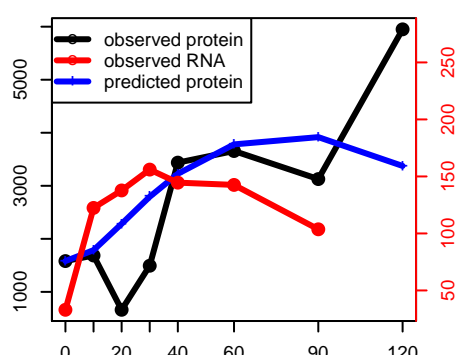

Time (min)  
ks = 0.714805433773055 kd = 0.0213959051589256

ARO1

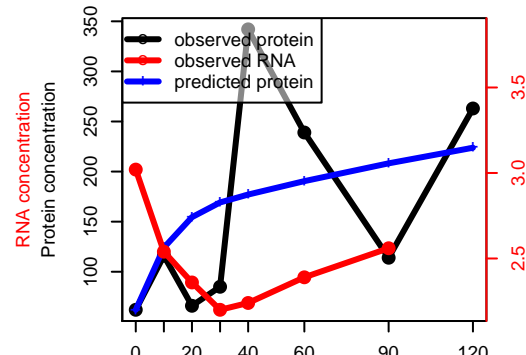

Time (min)  
ks = 3.7235228836725 kd = 0.042891351624834

ATP2

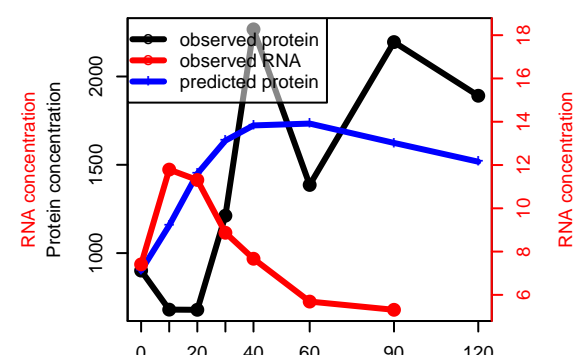

Time (min)  
ks = 4.41974740125092 kd = 0.0165933512404661

PUS1

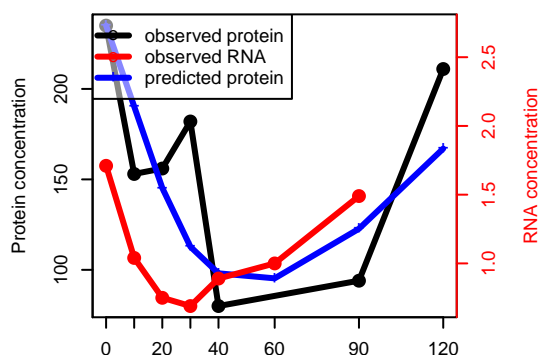

Time (min)  
ks = 5.59212332469735 kd = 0.0569473512927781

RPC19

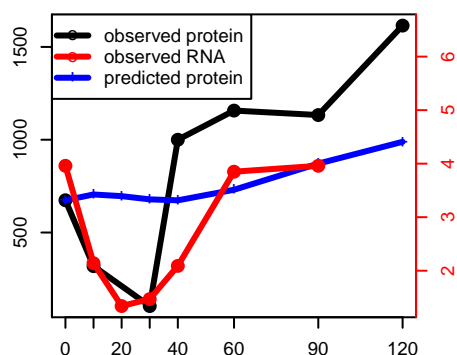

Time (min)  
ks = 2.98569991478725 kd = 0.00866735003847733

SFA1

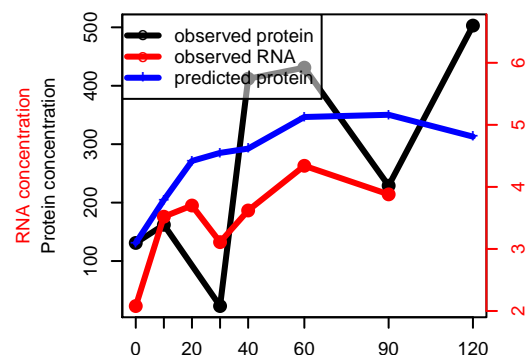

Time (min)  
ks = 8.04073498809263 kd = 0.0924418415576807

NTH1

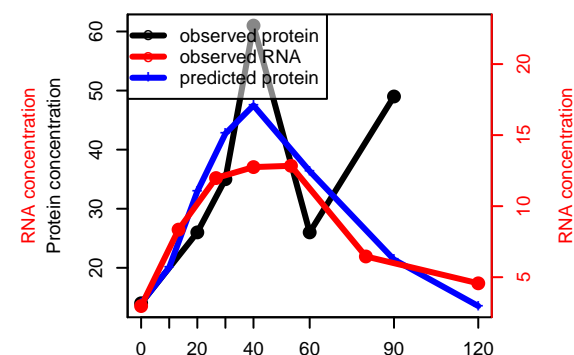

Time (min)  
ks = 0.372647316632001 kd = 0.0949090731296815



OAF1

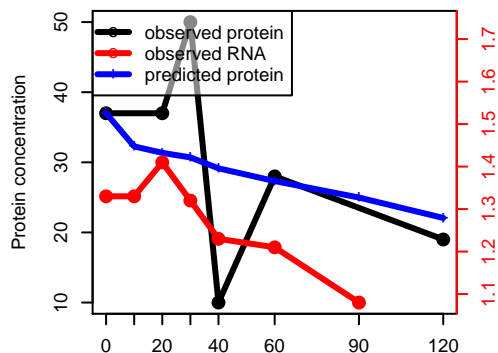

NMA111

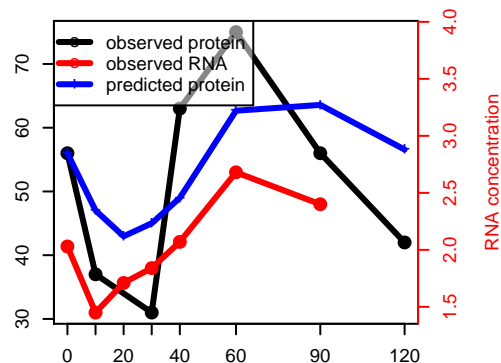

CPR6

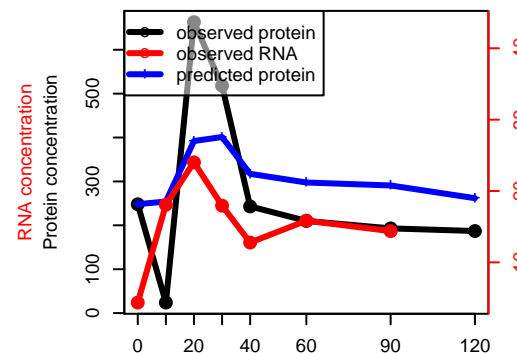

CDC37

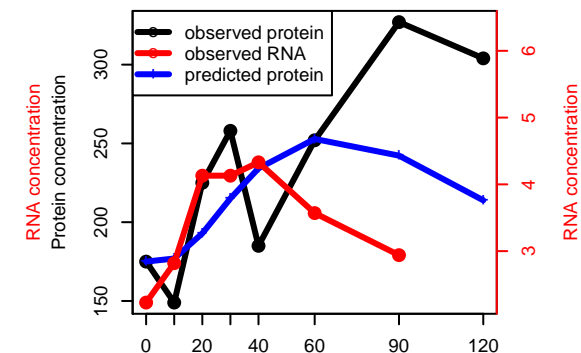

RPA12

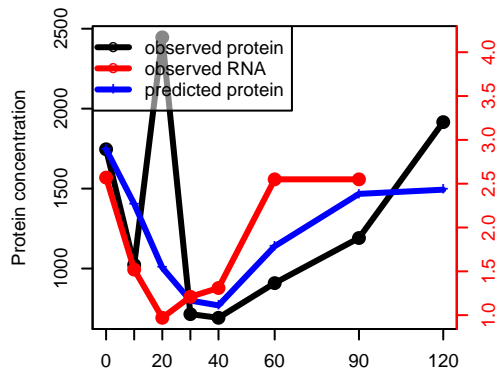

GON7

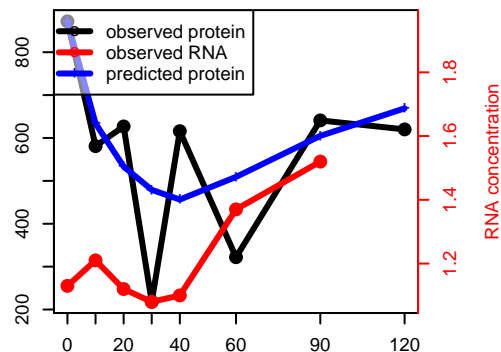

IMD1

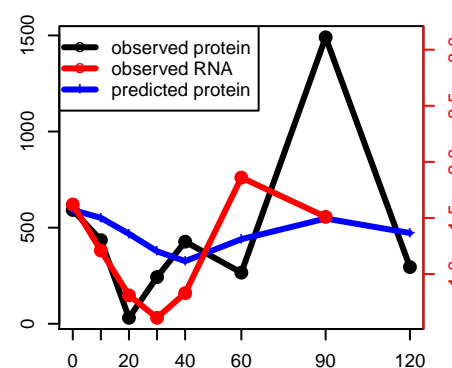

RPL18B

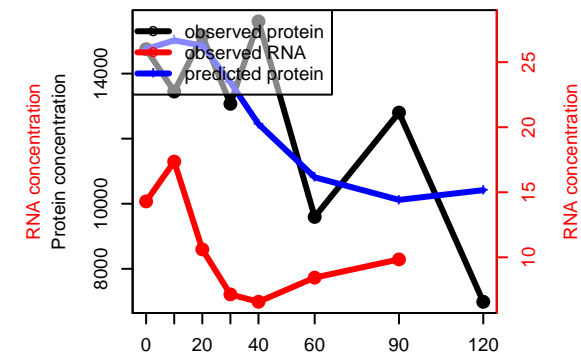

RNR4

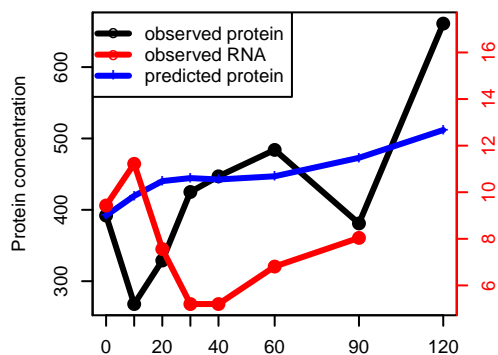

ADK1

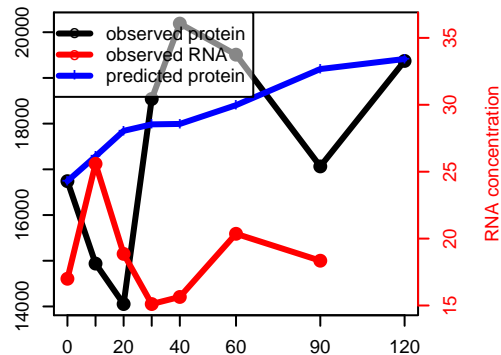

ILV5

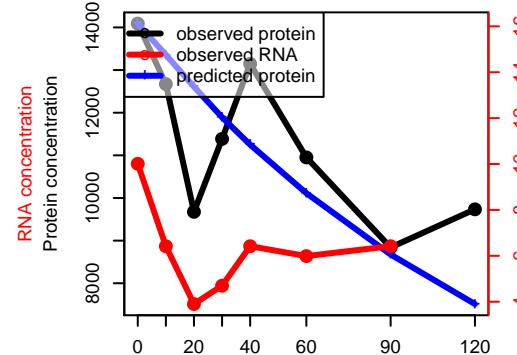

REE1

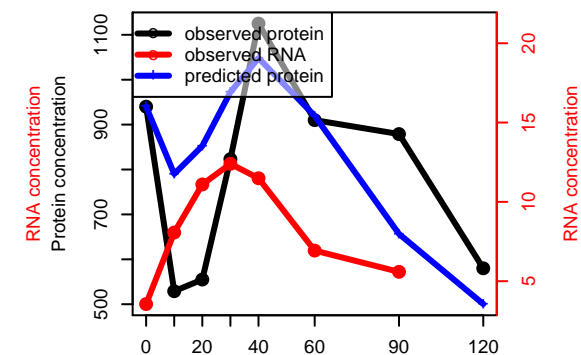



PGK1

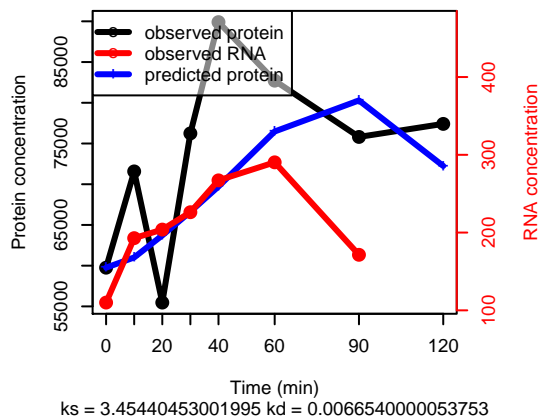

ENO2

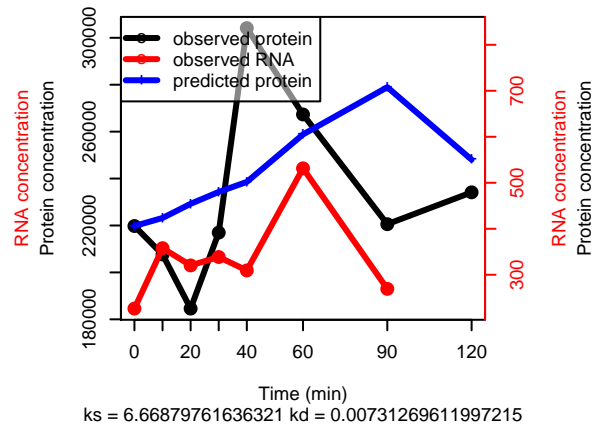

BAT2

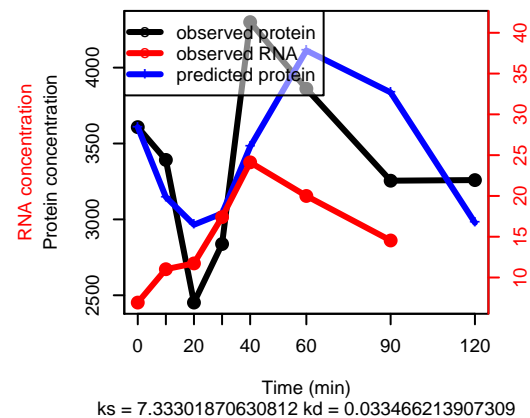

YNL208W

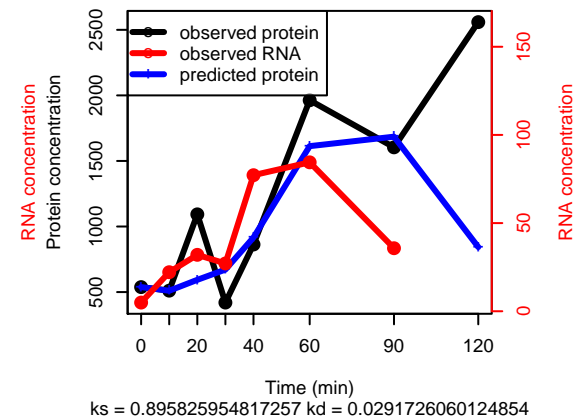

CPR5

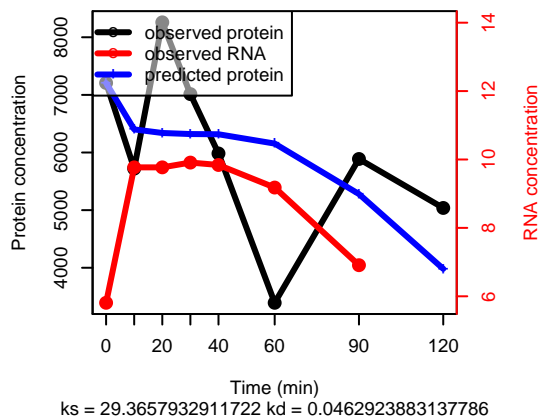

DUR1-2

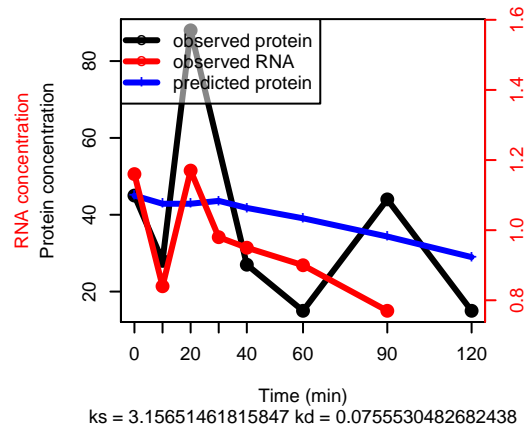

DPH5

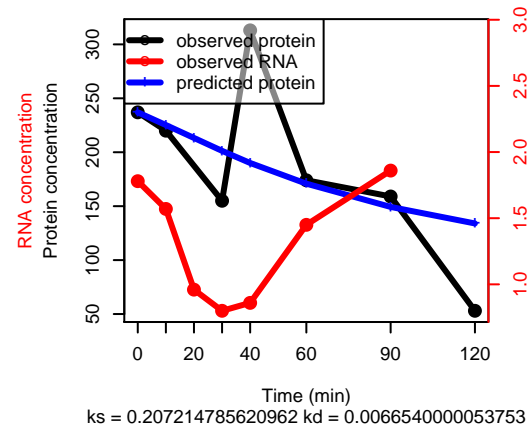

IML1

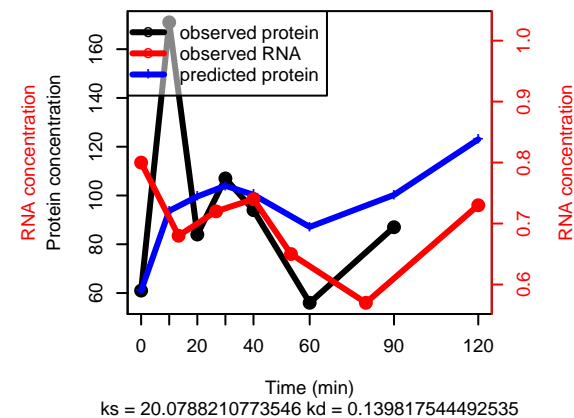

HRP1

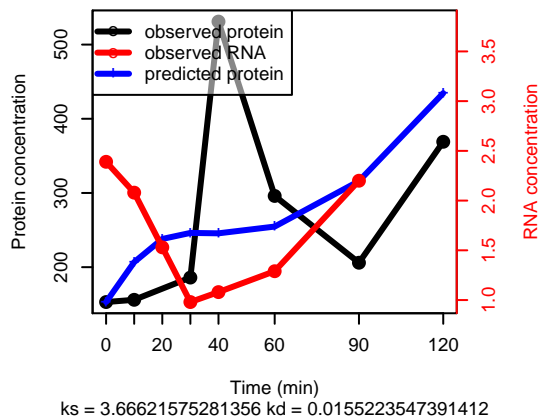

FUR1

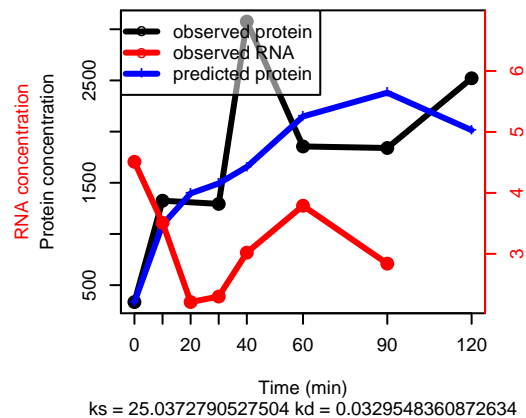

SDC1

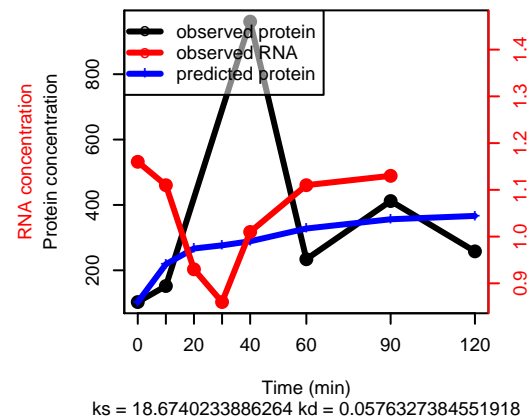

YFR006W

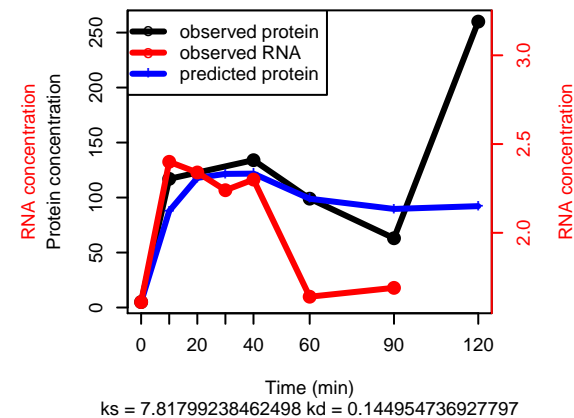

COX4

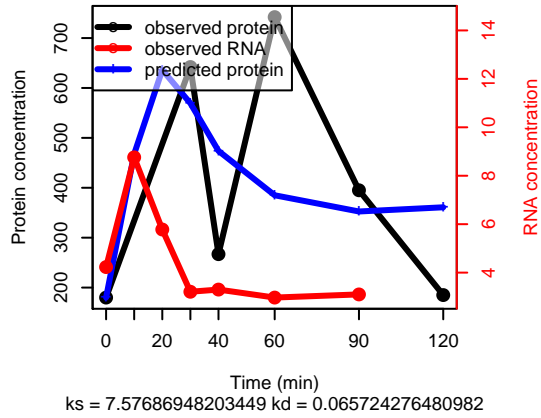

YML079W

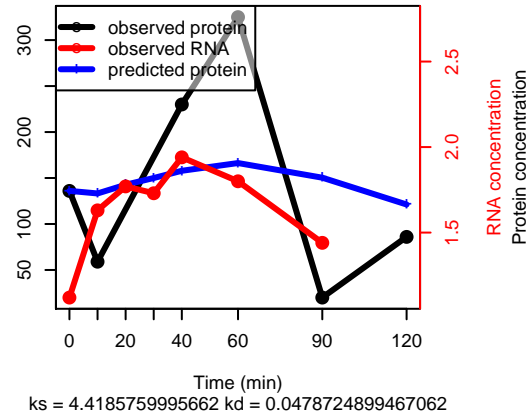

IOC4

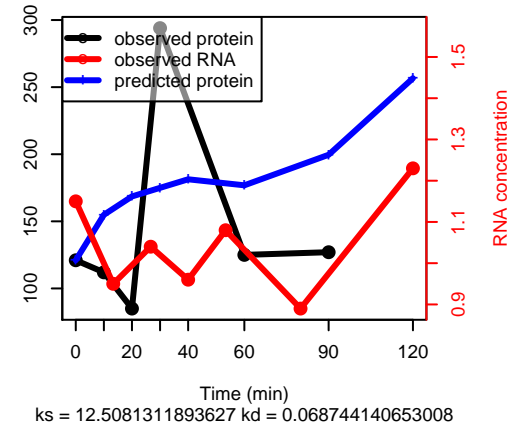

CSF1

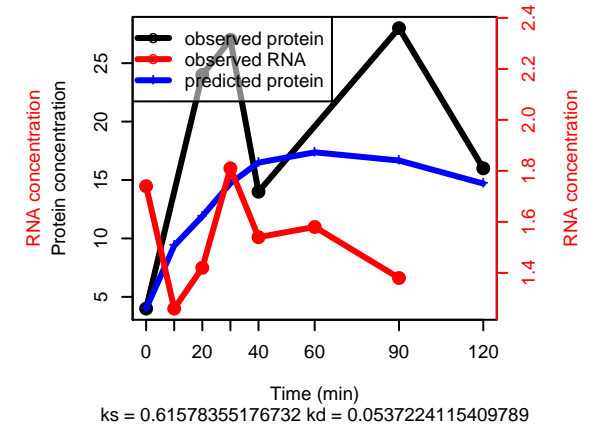

SPE3

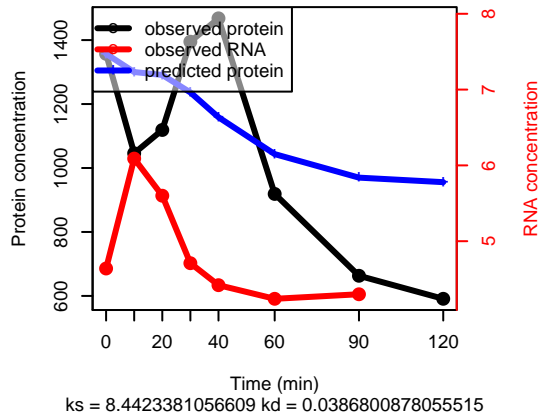

LSC1

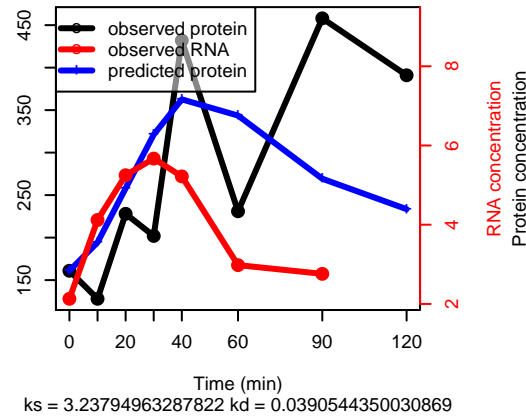

RPL26B

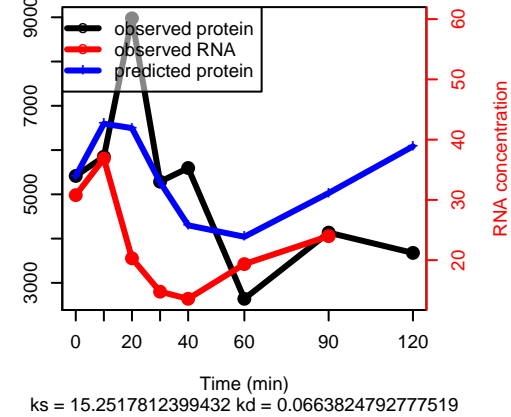

RPL11B

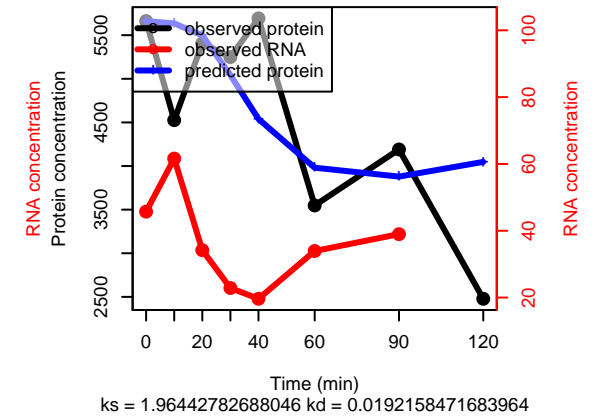

RPL20A

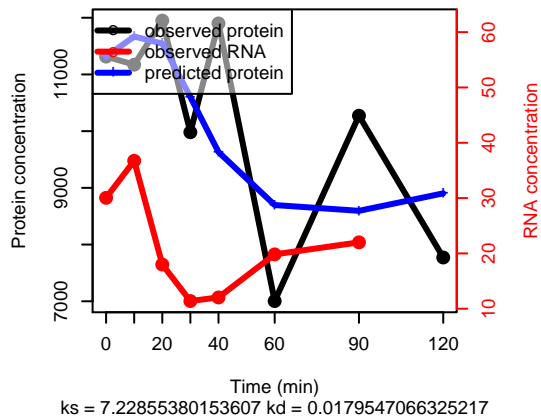

RPS18A

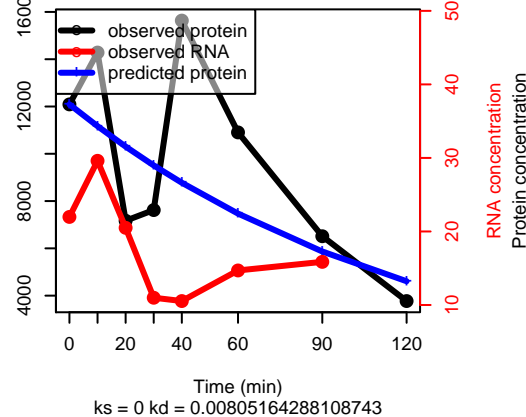

RPS6B

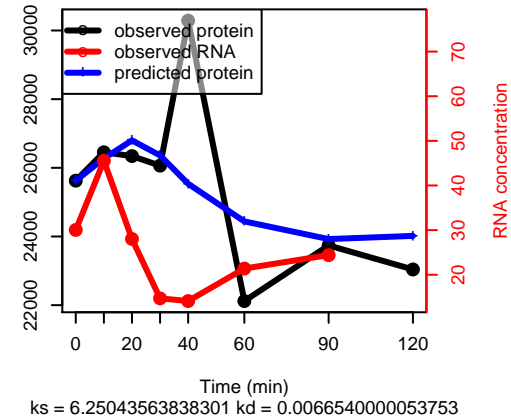

RPL5

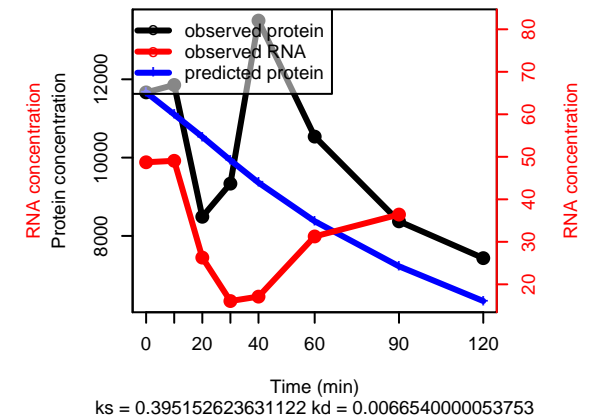

PDA1

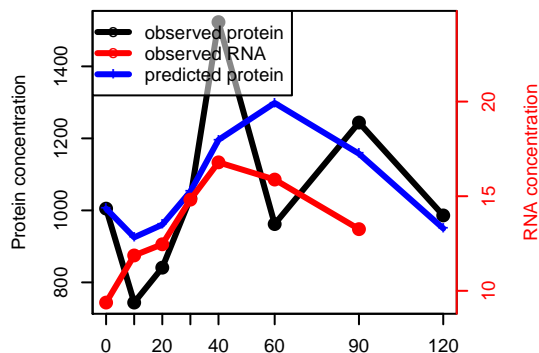

Time (min)  
ks = 7.25300965083918 kd = 0.0900190302208858

RPB2

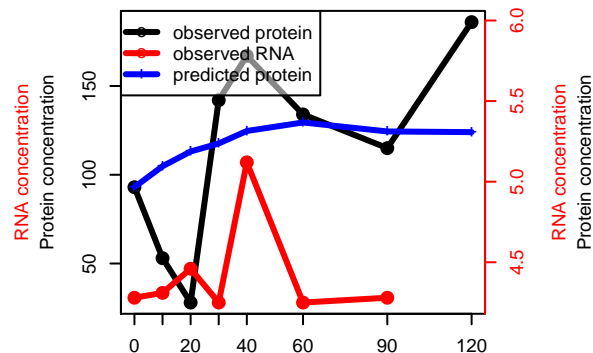

Time (min)  
ks = 1.45081476520906 kd = 0.0509972132330919

EGD2

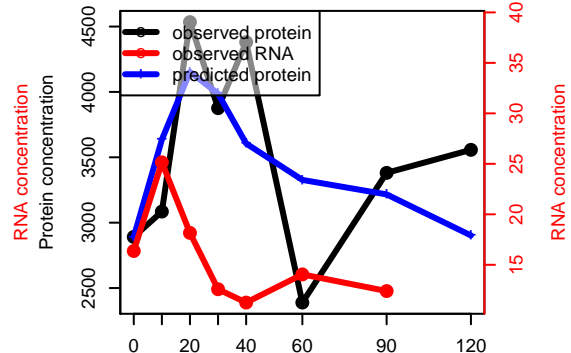

Time (min)  
ks = 10.1544590264331 kd = 0.0423684140258132

BFR1

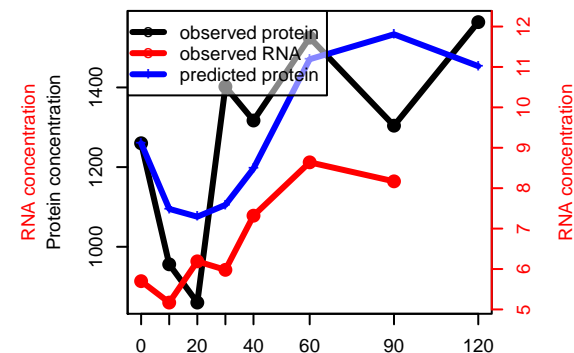

Time (min)  
ks = 18.3415828123606 kd = 0.0990871180587275

YGR054W

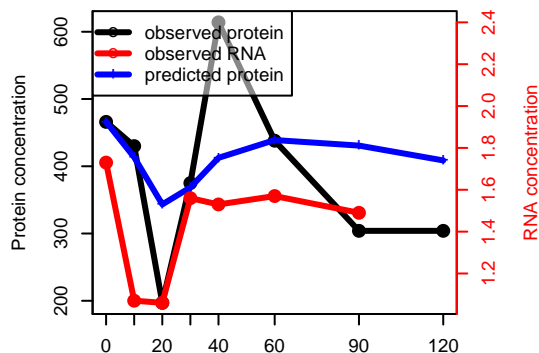

Time (min)  
ks = 28.5061814352437 kd = 0.10026721631557

MVD1

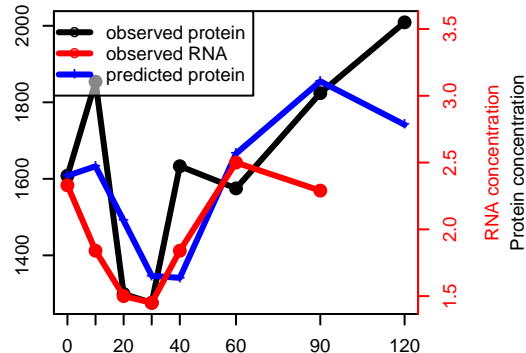

Time (min)  
ks = 50.212623711834 kd = 0.0622964849778142

RIB4

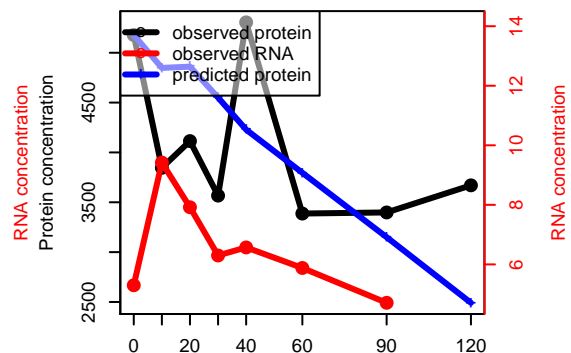

Time (min)  
ks = 25.487058145006 kd = 0.0449156864897649

RPS26B

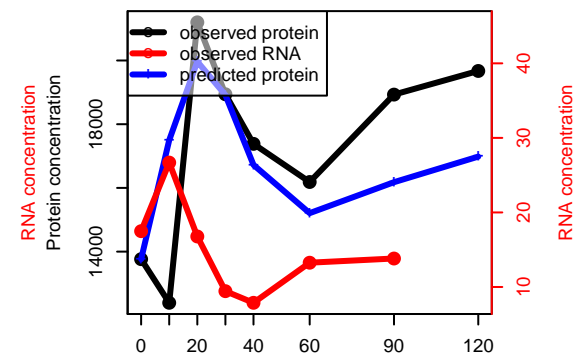

Time (min)  
ks = 38.4877746145647 kd = 0.0308489055082421

STM1

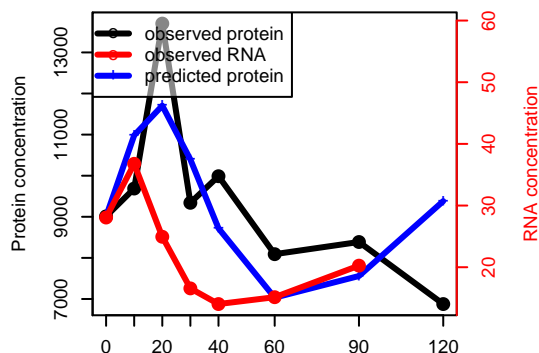

Time (min)  
ks = 22.5311594431114 kd = 0.0537001041517703

RRB1

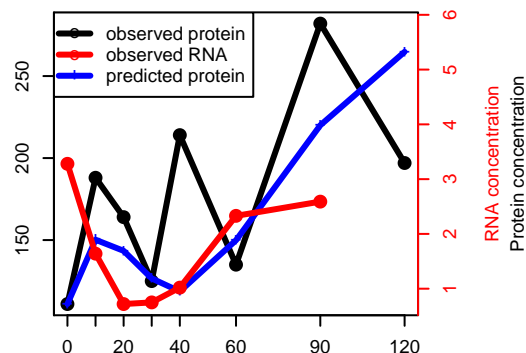

Time (min)  
ks = 3.28649064424532 kd = 0.0306503693094975

ACB1

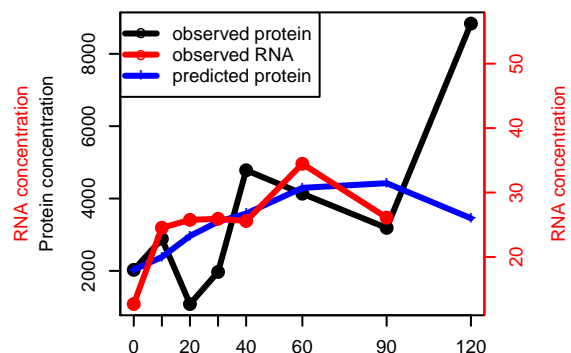

Time (min)  
ks = 7.82282916765222 kd = 0.0514202551075495

TDH2

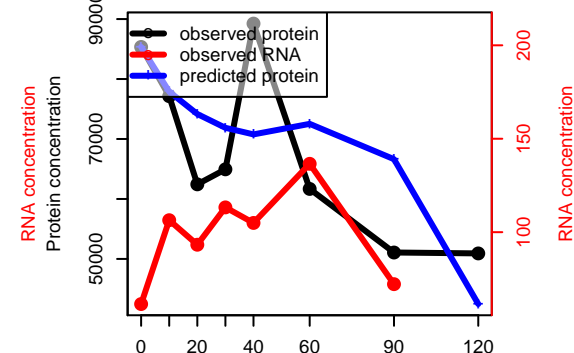

Time (min)  
ks = 15.965000525573 kd = 0.0258450827079829

PUP2

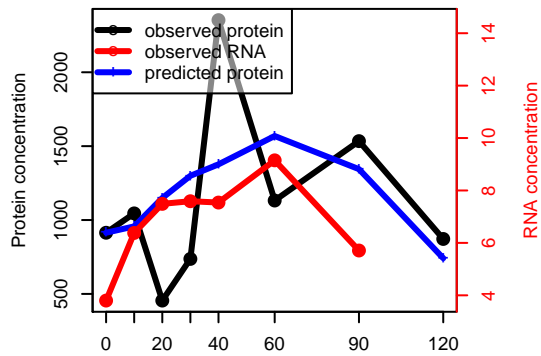

Time (min)  
ks = 13.2620803646677 kd = 0.0694389496880436

TPM1

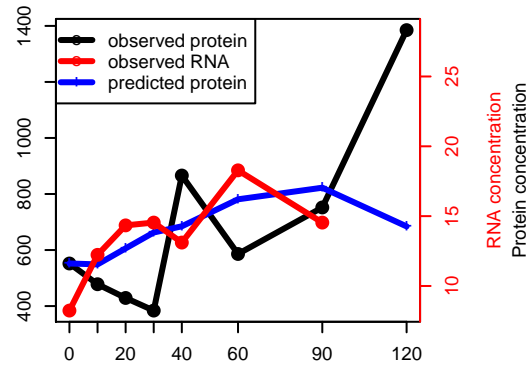

Time (min)  
ks = 2.47552047174908 kd = 0.0472891398574265

APE3

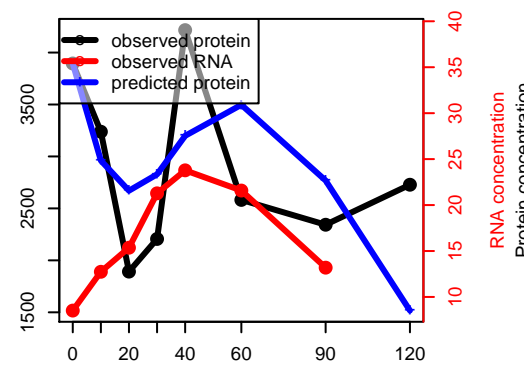

Time (min)  
ks = 9.37762519036843 kd = 0.0575822781934368

TRP2

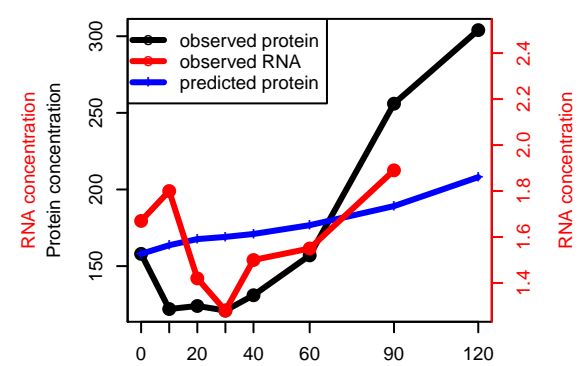

Time (min)  
ks = 0.941260976717101 kd = 0.006654000053753

PIN3

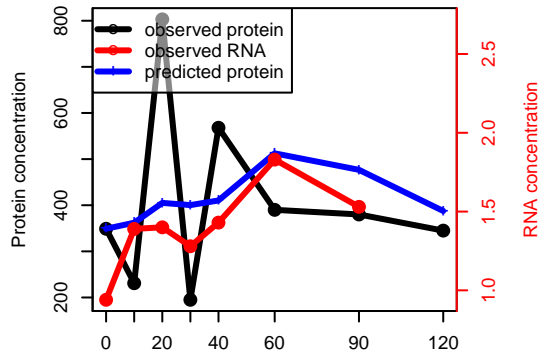

Time (min)  
ks = 47.0822438154838 kd = 0.157431863451844

SKI2

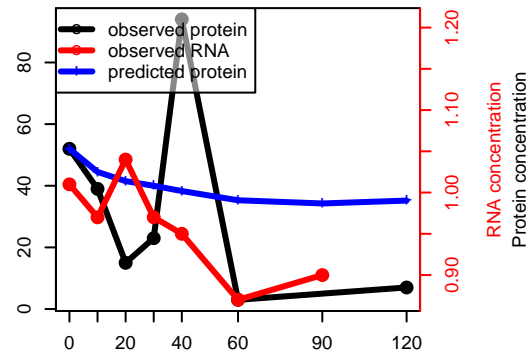

Time (min)  
ks = 2.99465810699285 kd = 0.0775993833490029

RPL14B

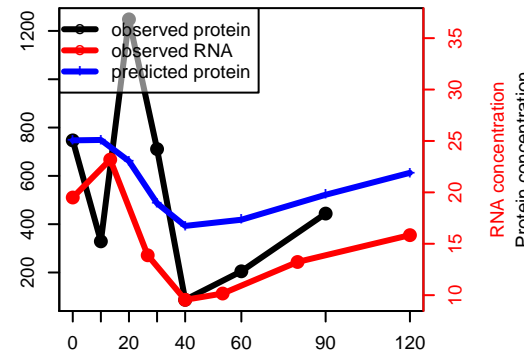

Time (min)  
ks = 3.62994105383287 kd = 0.104854512667563

YOL057W

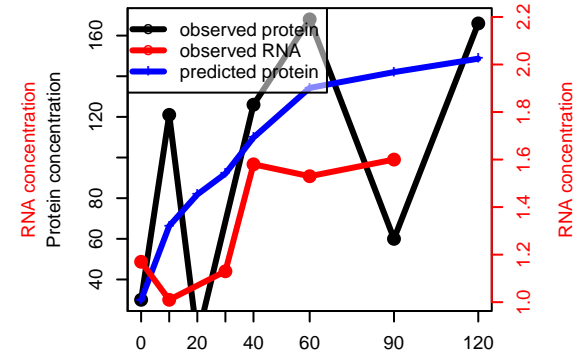

Time (min)  
ks = 6.79874085506914 kd = 0.0736589247188538

RPB3

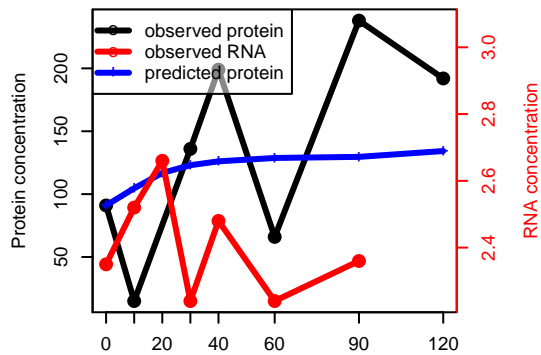

Time (min)  
ks = 2.001980617016 kd = 0.0358618362598692

DOA4

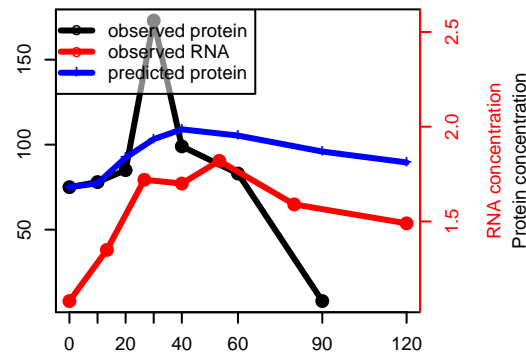

Time (min)  
ks = 7.3043761435489 kd = 0.115918159424535

NSG2

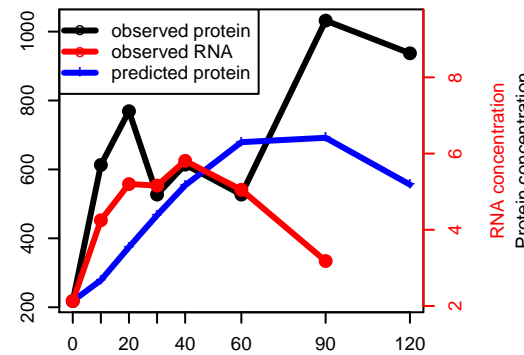

Time (min)  
ks = 3.35438264859826 kd = 0.0191400132488238

GRX2

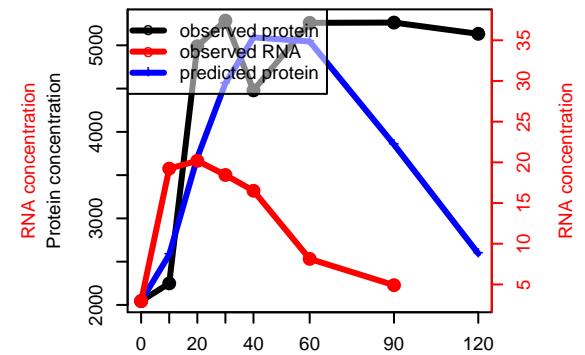

Time (min)  
ks = 9.29708247898706 kd = 0.0225092344461112

ARG4

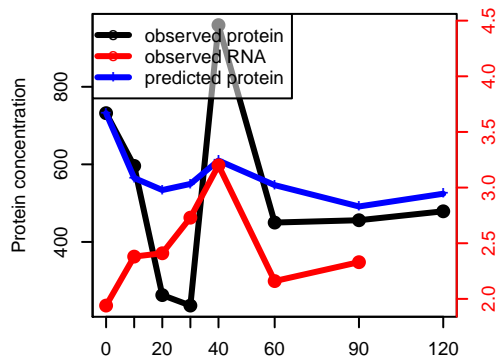

Time (min)  
ks = 22.5459942112512 kd = 0.104555366202033

RPL16B

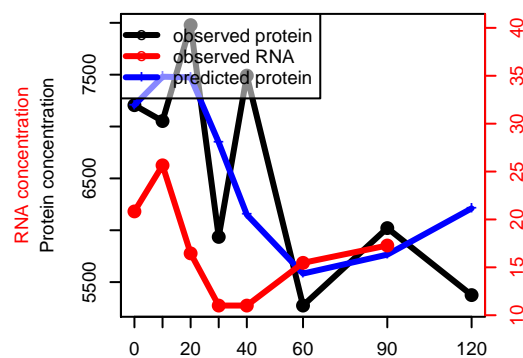

Time (min)  
ks = 9.84177419868992 kd = 0.0275156392523144

TIF2

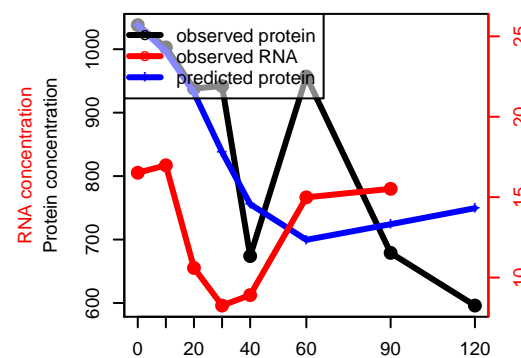

Time (min)  
ks = 1.08034899075265 kd = 0.0221189472425501

WWM1

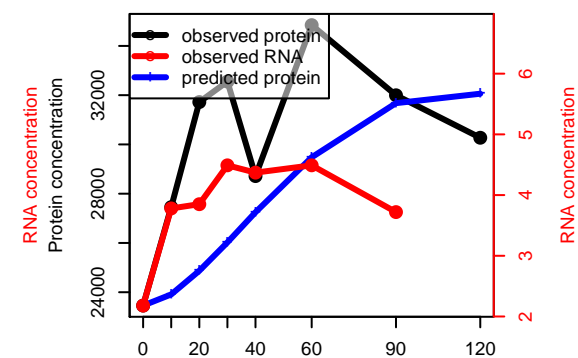

Time (min)  
ks = 67.8187073793165 kd = 0.0066540000053753

RPS31

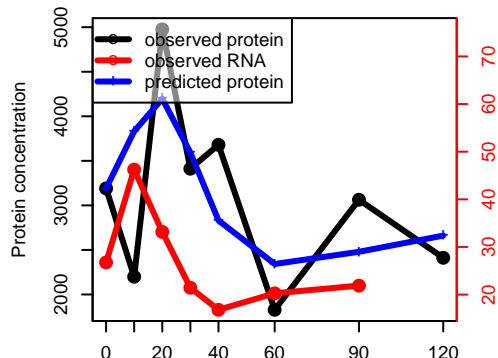

Time (min)  
ks = 9.09608272178257 kd = 0.0785386337419197

GGA2

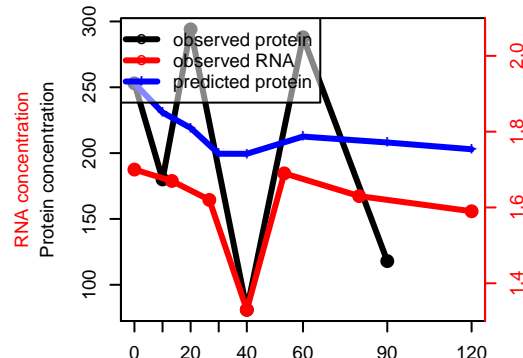

Time (min)  
ks = 12.8468198412343 kd = 0.0991919107263028

TAE2

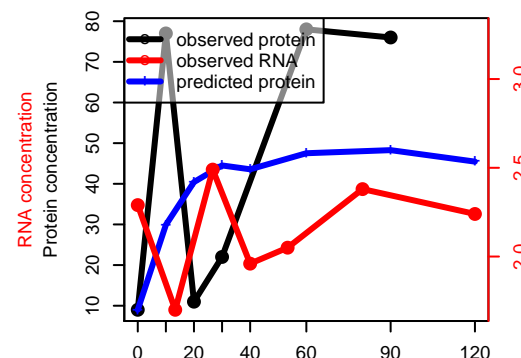

Time (min)  
ks = 2.17607634011145 kd = 0.101278259244284

FMP27

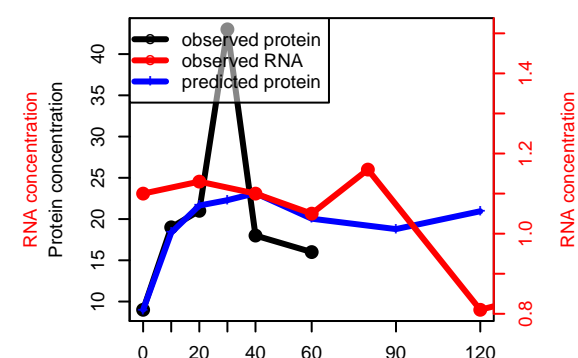

Time (min)  
ks = 2.14433171240259 kd = 0.101011770727916

RPL36A

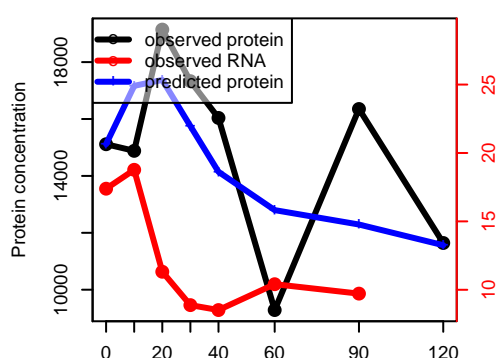

Time (min)  
ks = 43.6824743480593 kd = 0.0361891308025288

RPL38

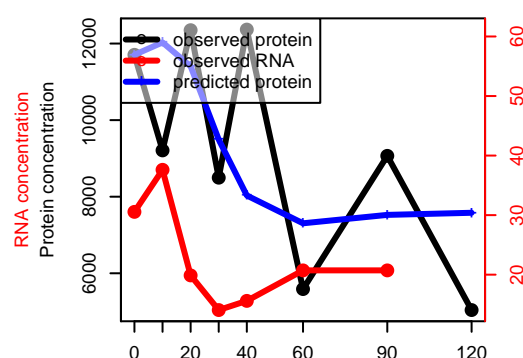

Time (min)  
ks = 16.611786352287 kd = 0.0452612931257808

TMA19

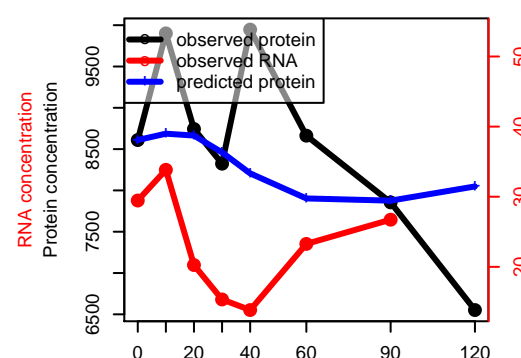

Time (min)  
ks = 2.058325444179 kd = 0.0066540000053753

FPR2

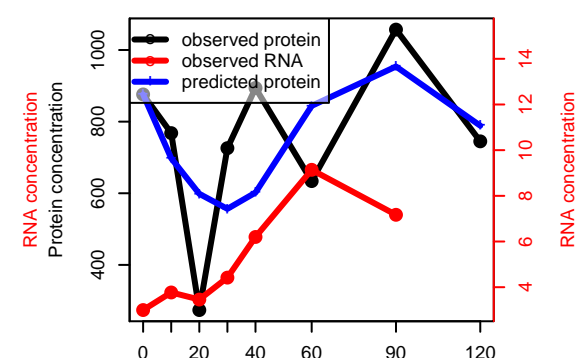

Time (min)  
ks = 6.21670100109832 kd = 0.0500889419724092

TDH1

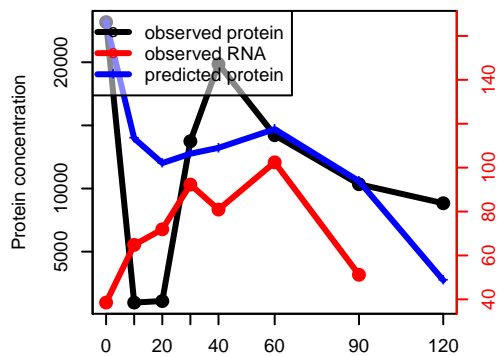

Time (min)  
ks = 15.4770015466891 kd = 0.0984047567415784

YRB1

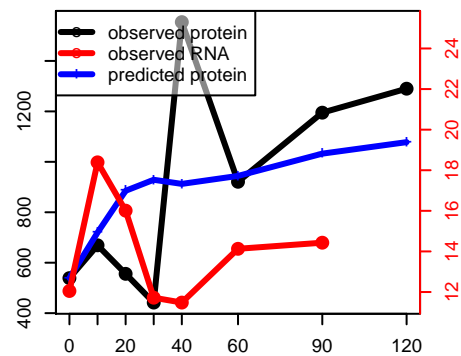

Time (min)  
ks = 2.59596570731139 kd = 0.0345384082967912

RPL10

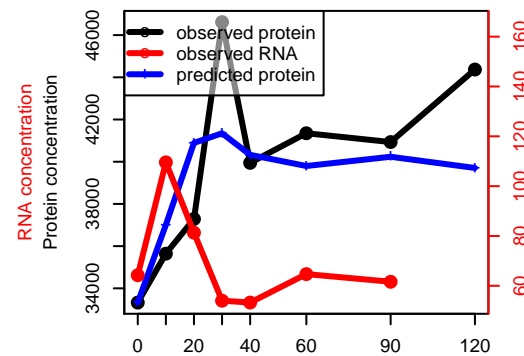

Time (min)  
ks = 10.9763286841704 kd = 0.0167977820209108

NOG1

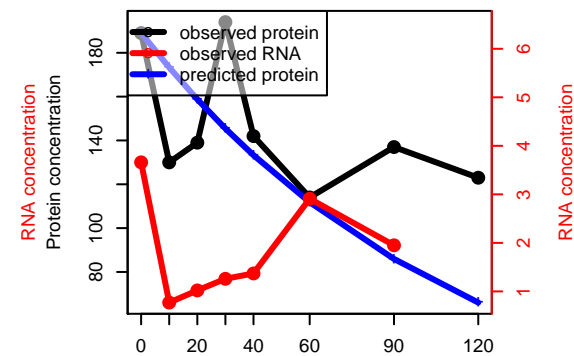

Time (min)  
ks = 0 kd = 0.00877815409445618

SCC2

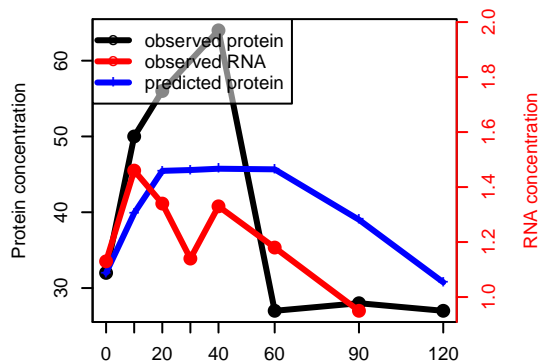

Time (min)  
ks = 2.38498943925925 kd = 0.0644050184802128

PHO3

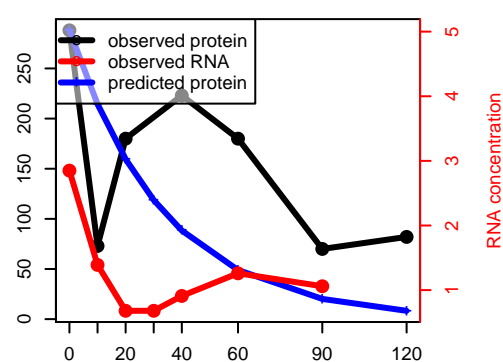

Time (min)  
ks = 0 kd = 0.0295391955782804

MDH1

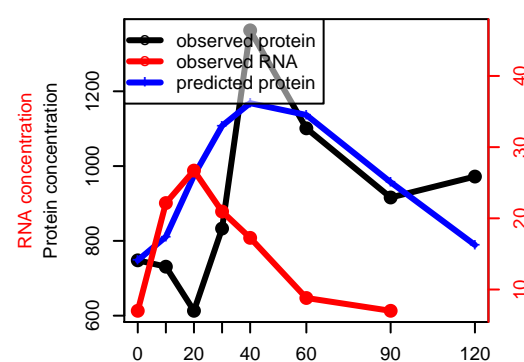

Time (min)  
ks = 1.21548589810845 kd = 0.0149137431259754

ZWF1

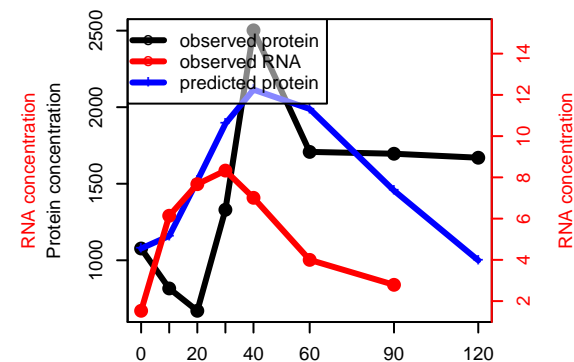

Time (min)  
ks = 12.0179878926108 kd = 0.0351667897281332

IPP1

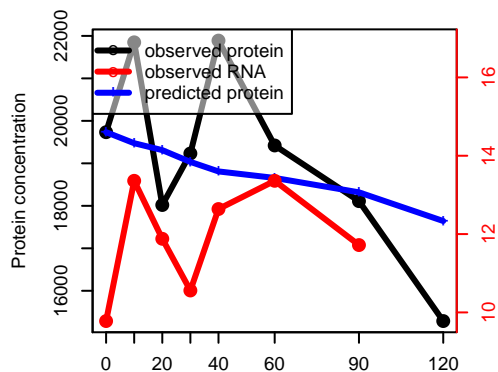

Time (min)  
ks = 8.91387688676017 kd = 0.0066540000053753

RPP2B

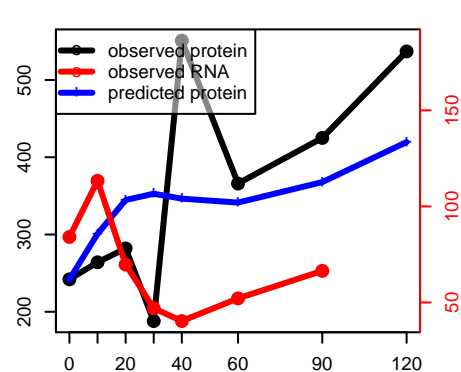

Time (min)  
ks = 0.0984157295106527 kd = 0.0141743216853981

RPL9B

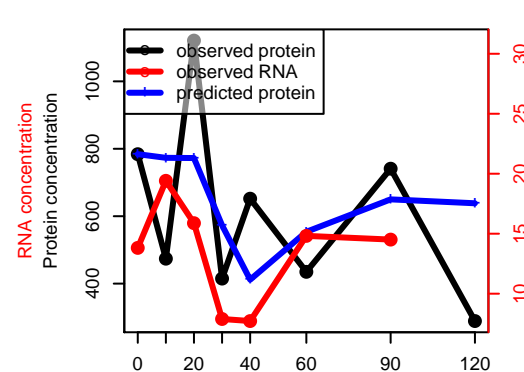

Time (min)  
ks = 5.71603261384963 kd = 0.127874782161115

RPL6B

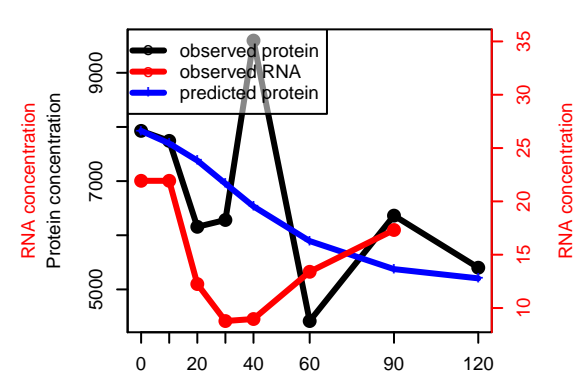

Time (min)  
ks = 2.19997668681589 kd = 0.00915347794153581



YPR1

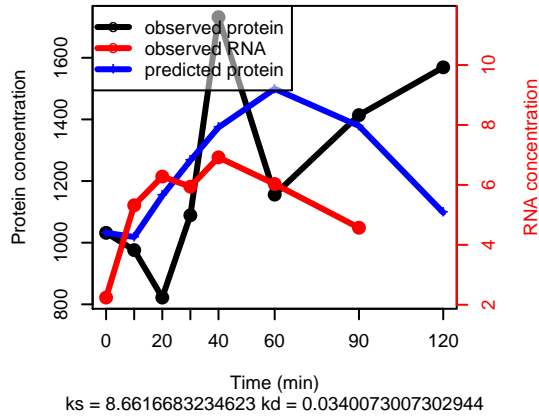

YGP1

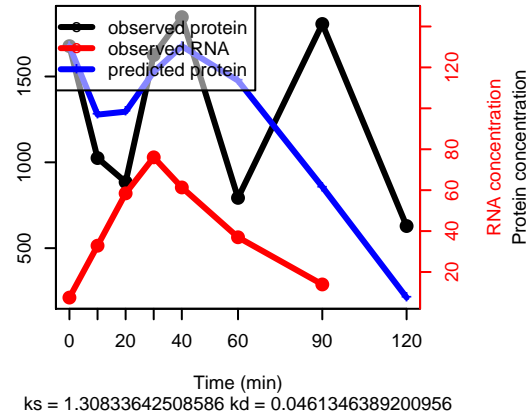

PDB1

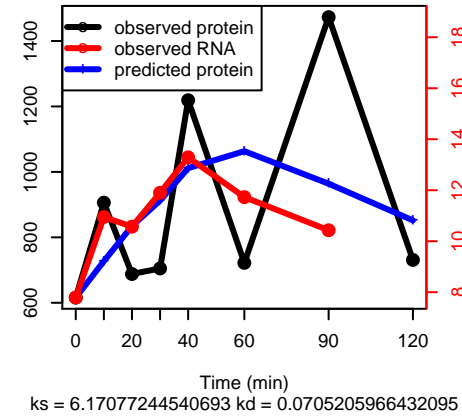

CWH41

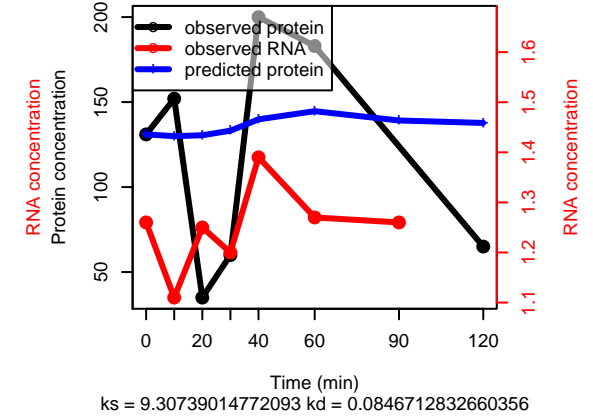

GIS2

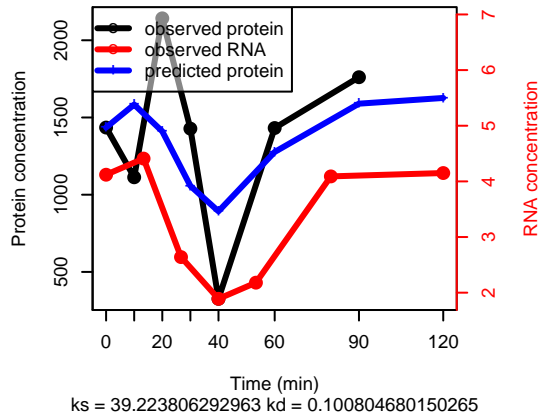

RDL1

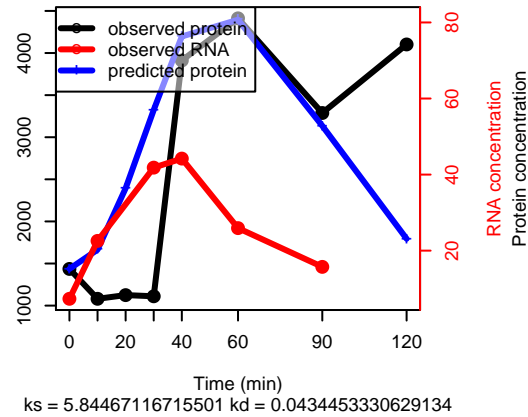

PTC2

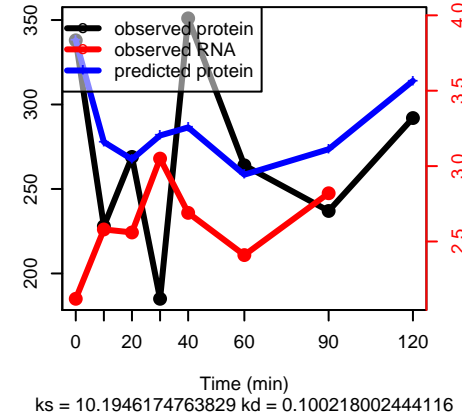

ADE3

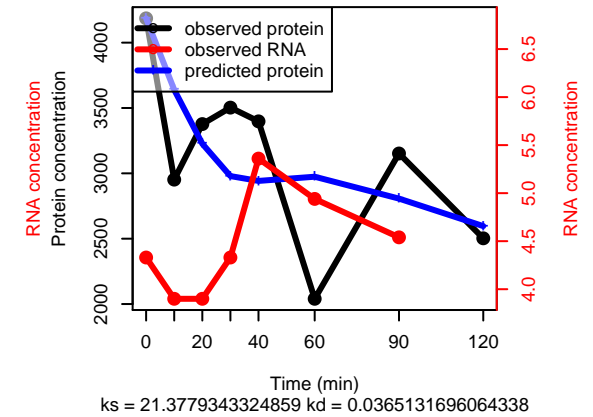

AAH1

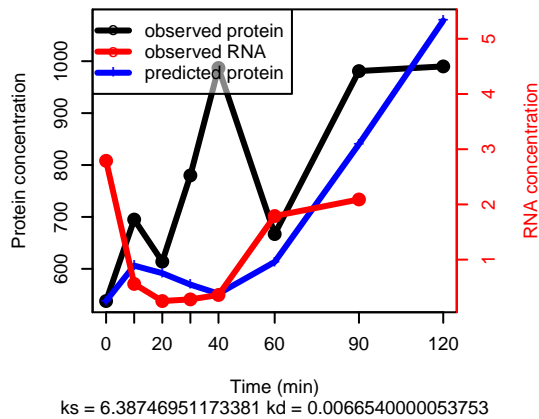

RPS28B

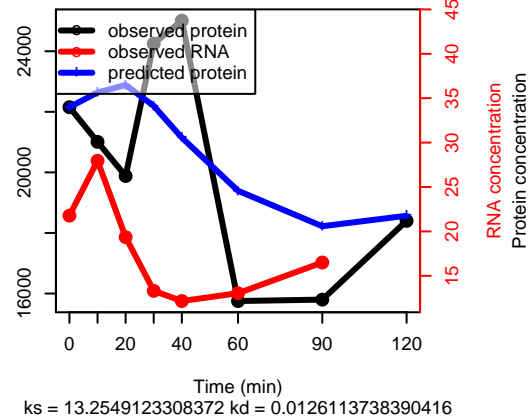

FRS1

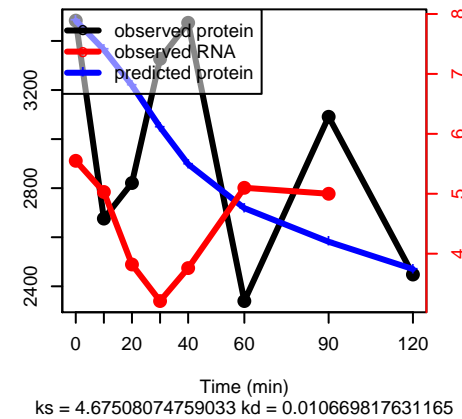

PRE6

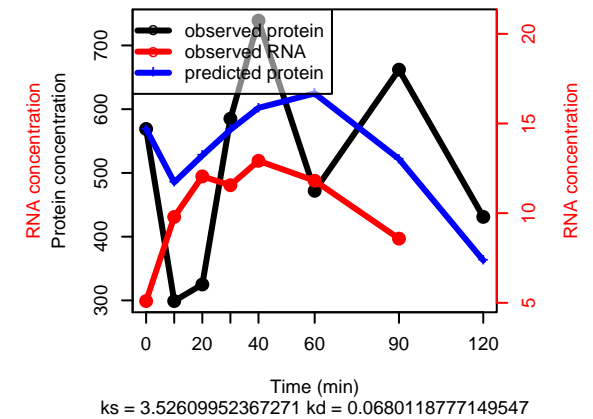



YEL047C

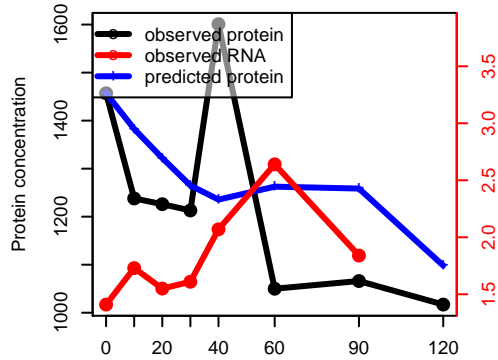

YRA1

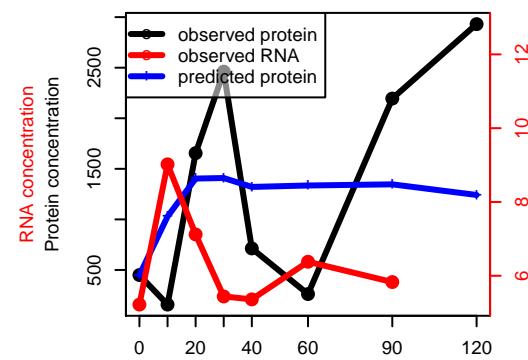

YNL247W

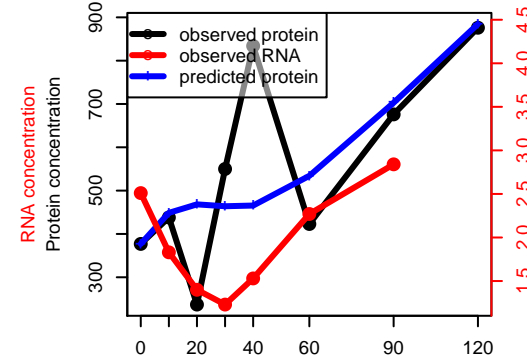

PRD1

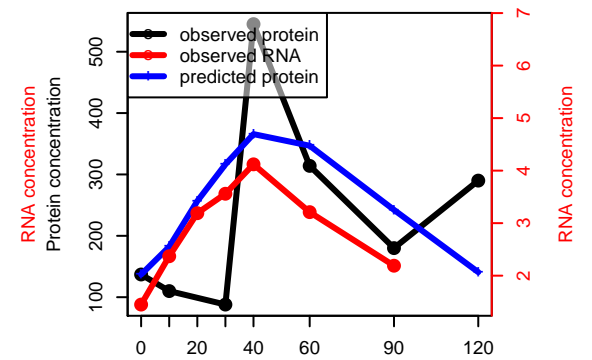

PPH22

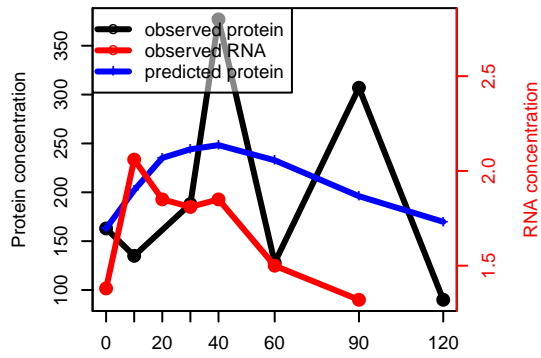

TIM10

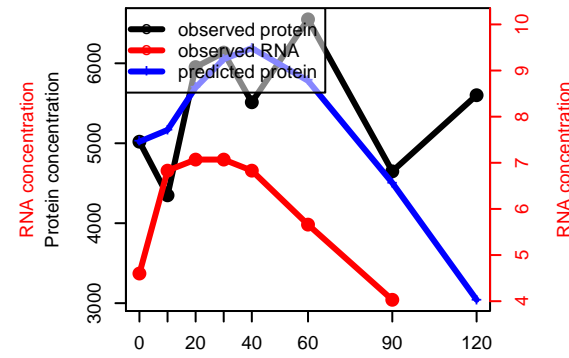

ARA1

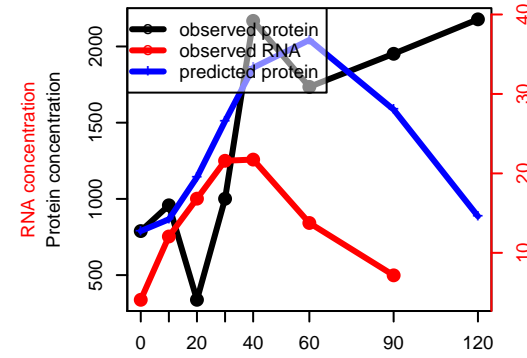

MET22

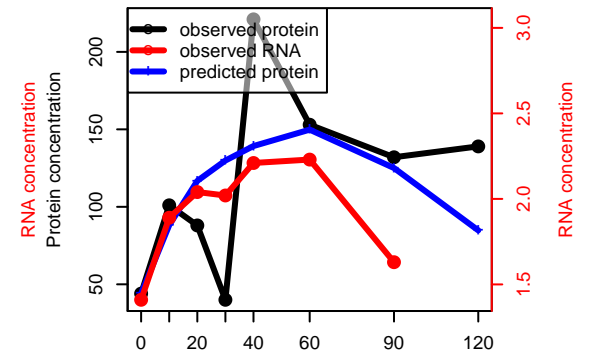

GCV3

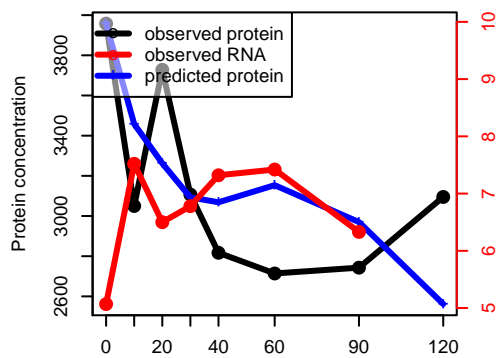

ARO8

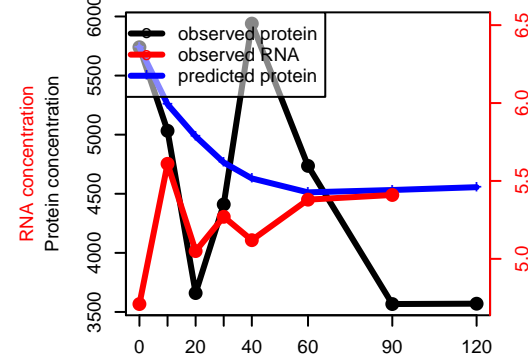

HSC82

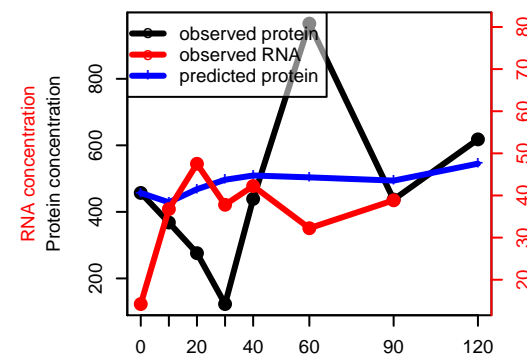

HHF1

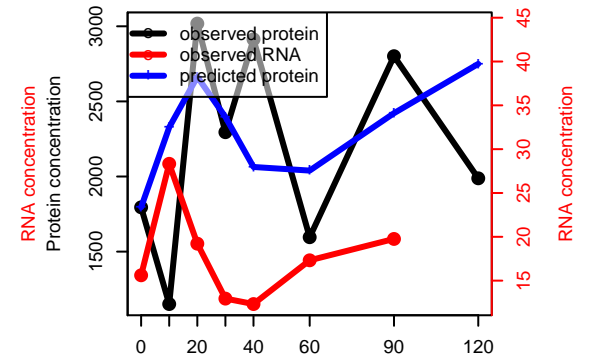

YCR051W

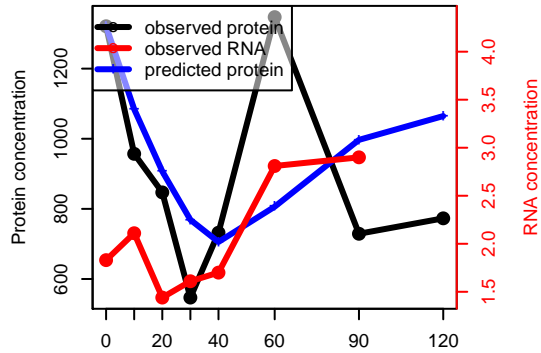

Time (min)  
ks = 18.6143374244332 kd = 0.0507269926121046

IDP1

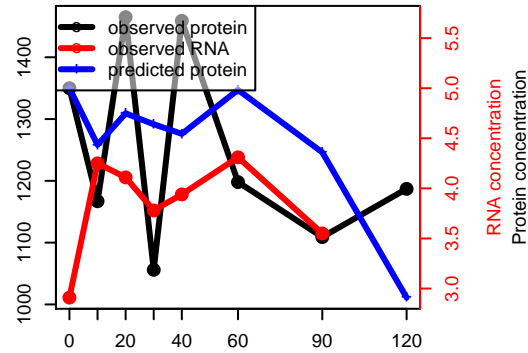

Time (min)  
ks = 27.2788181216283 kd = 0.0843147767239503

HMF1

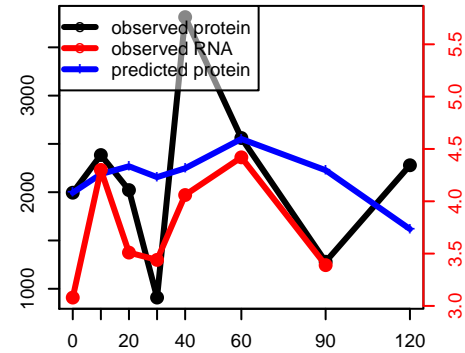

Time (min)  
ks = 65.3184204836583 kd = 0.108478362560077

CAF20

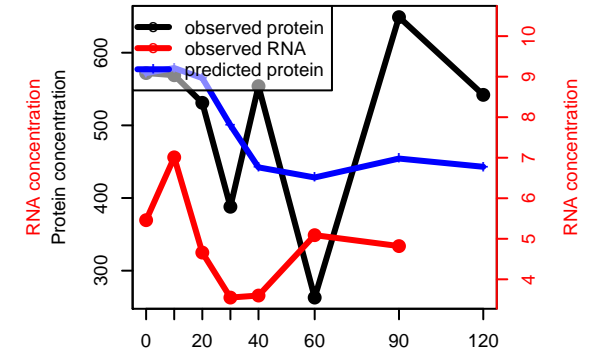

Time (min)  
ks = 4.09298641881871 kd = 0.0434924381956509

RPS19B

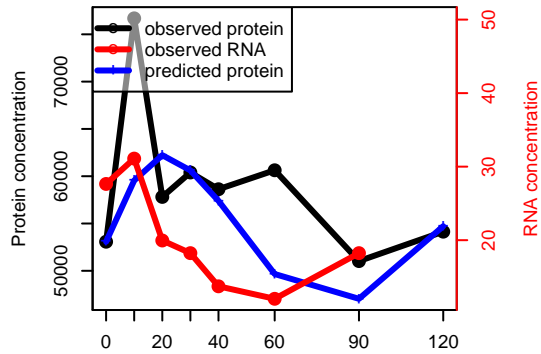

Time (min)  
ks = 67.2203806756799 kd = 0.0236067712542337

RPL35B

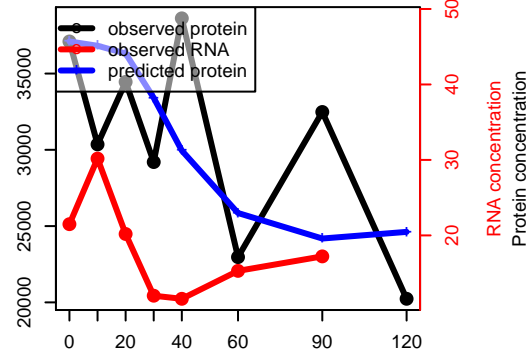

Time (min)  
ks = 30.5575315327503 kd = 0.0222949855757918

TYS1

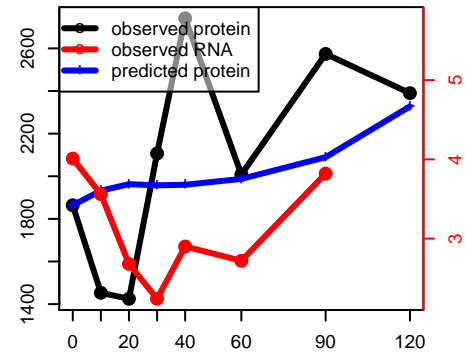

Time (min)  
ks = 5.14682085360869 kd = 0.0066540000053753

IDH2

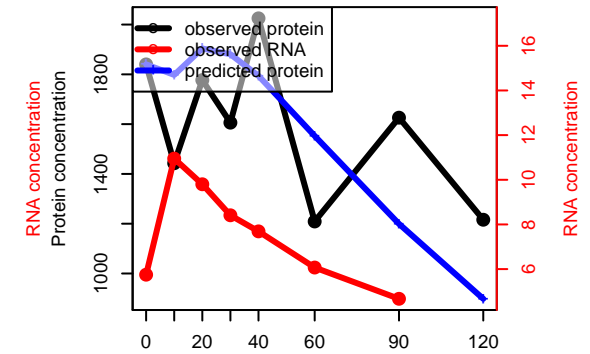

Time (min)  
ks = 9.24315554622644 kd = 0.0457261676296582

ADH3

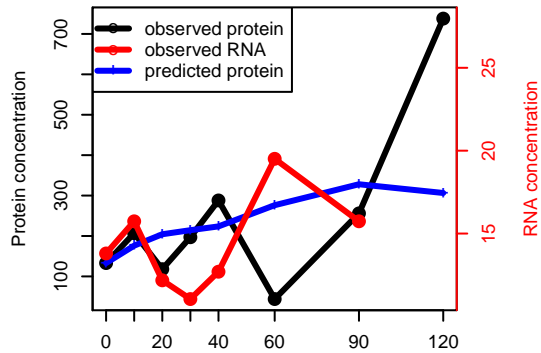

Time (min)  
ks = 0.576326280794337 kd = 0.0271770840863859

YMR295C

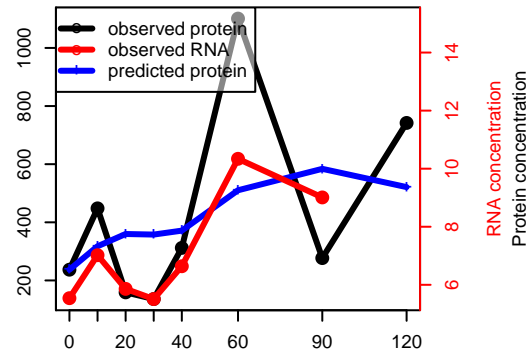

Time (min)  
ks = 4.23915251832033 kd = 0.0671066969385024

SIS1

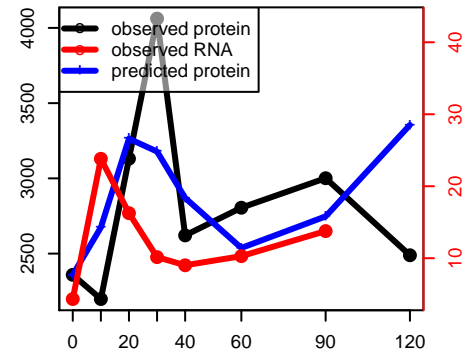

Time (min)  
ks = 8.68263188561389 kd = 0.0379417304308106

PMI40

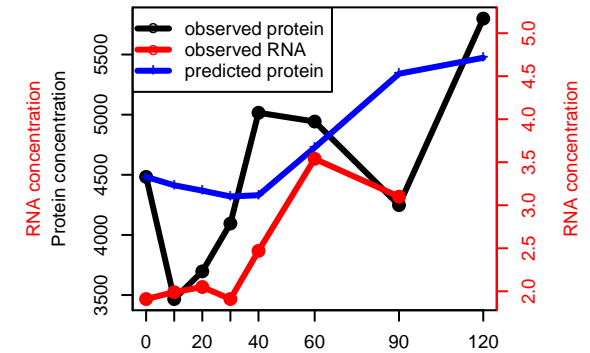

Time (min)  
ks = 25.8679379170619 kd = 0.0128790551686501

TRM1

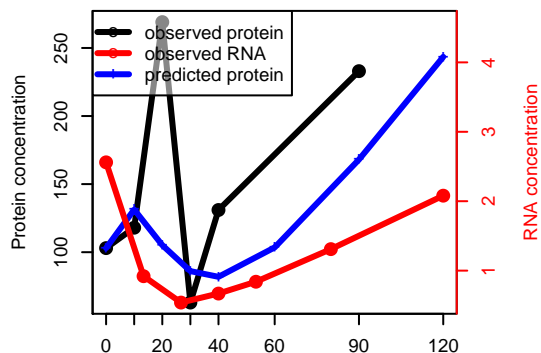

Time (min)  
ks = 5.82460480531035 kd = 0.0577042725916476

STE23

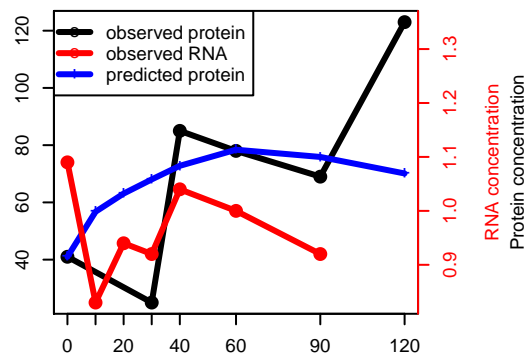

Time (min)  
ks = 4.89913299695669 kd = 0.0617712834987764

MEU1

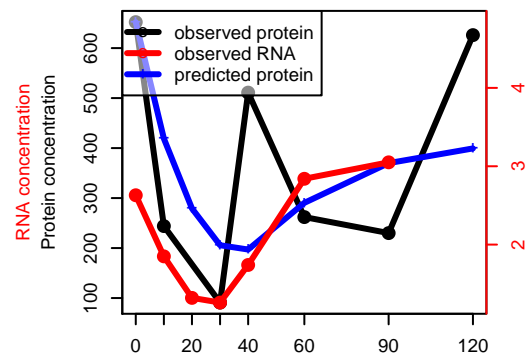

Time (min)  
ks = 12.0057970868676 kd = 0.0955529820634267

HIS7

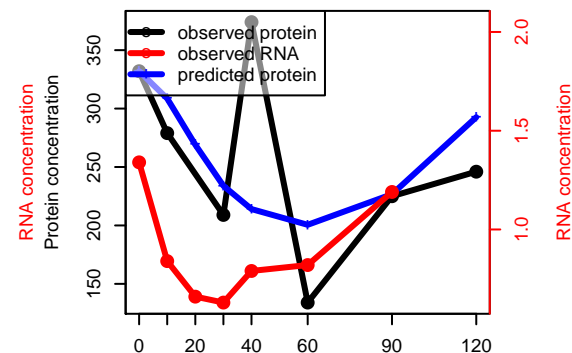

Time (min)  
ks = 8.2586933432647 kd = 0.0351372758812142

EDE1

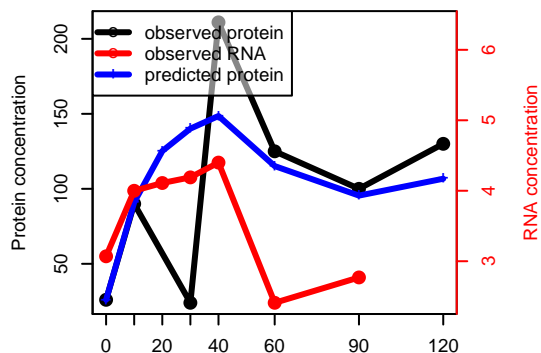

Time (min)  
ks = 3.54441903634537 kd = 0.0987295122724688

ECM32

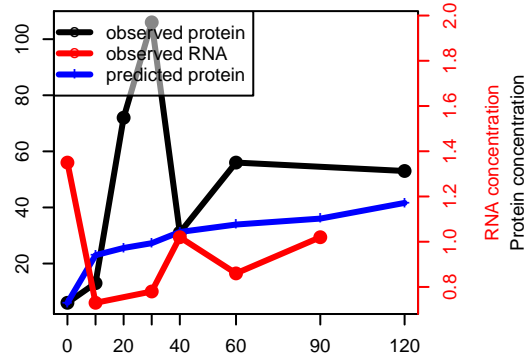

Time (min)  
ks = 2.92312885968947 kd = 0.078562836487635

GRX1

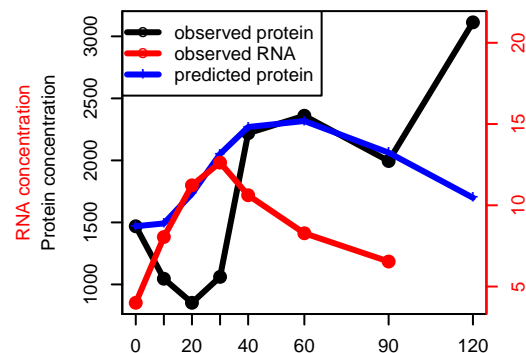

Time (min)  
ks = 7.04159158864824 kd = 0.0274960607449244

RPL34A

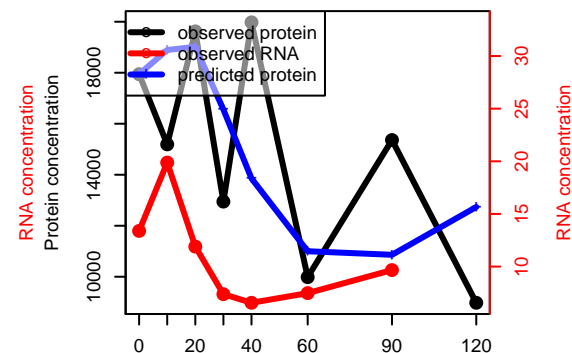

Time (min)  
ks = 50.9066386747875 kd = 0.0413282635900048

RPS1B

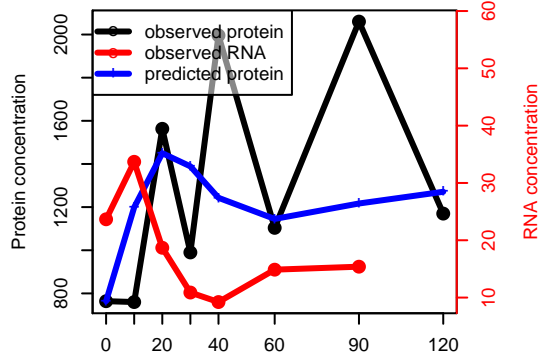

Time (min)  
ks = 2.54915379764605 kd = 0.0304364880325813

PHO11

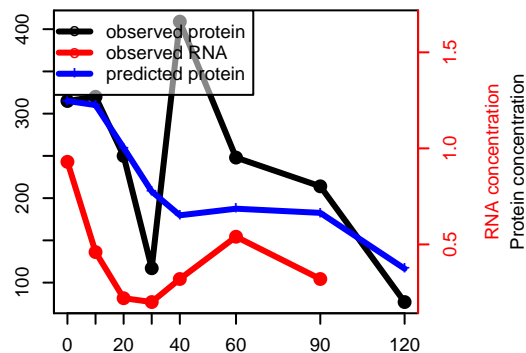

Time (min)  
ks = 16.0982060451176 kd = 0.0366672728550147

HXK2

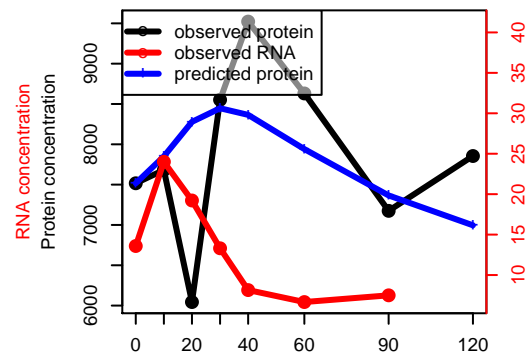

Time (min)  
ks = 4.46489572914326 kd = 0.0066540000053753

TOS1

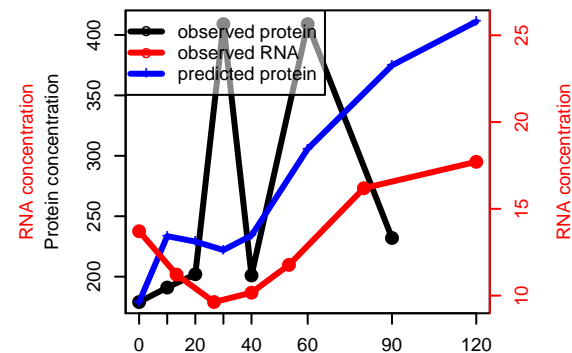

Time (min)  
ks = 1.95432109353411 kd = 0.0881689195899967

PRE7

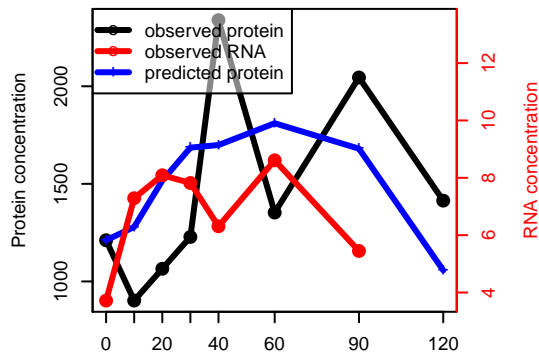

Time (min)  
ks = 11.7465294554985 kd = 0.0476252256384595

FRS2

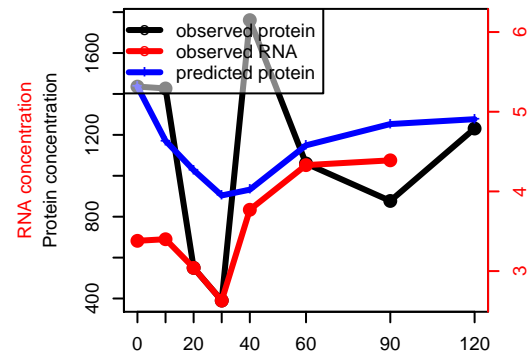

Time (min)  
ks = 24.9346578686706 kd = 0.0864016255427716

ARG5-6

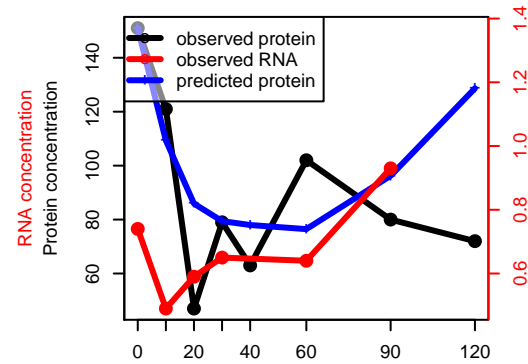

Time (min)  
ks = 8.52977870215489 kd = 0.0727062190088622

RPL16A

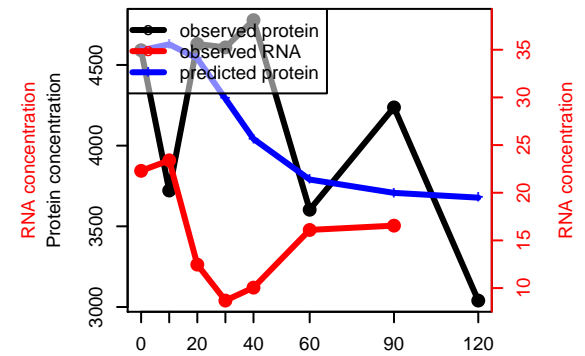

Time (min)  
ks = 2.50368241163267 kd = 0.0116200993514347

ACP1

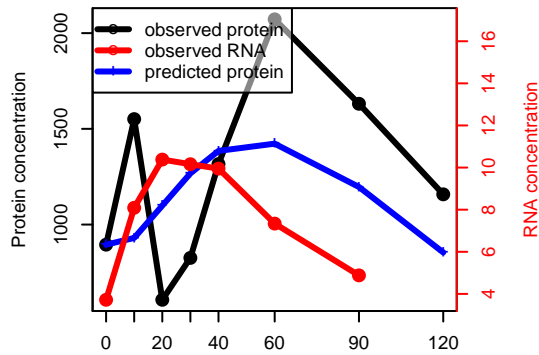

Time (min)  
ks = 4.96682009087105 kd = 0.0287660046703159

NIF3

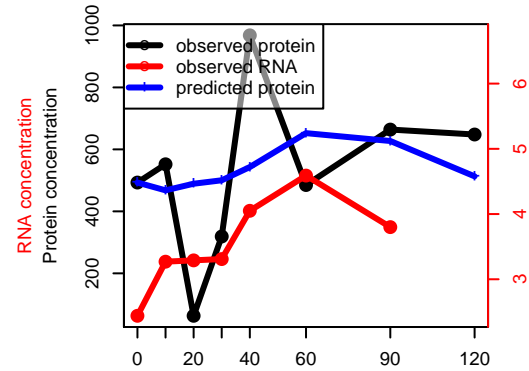

Time (min)  
ks = 12.7721261913681 kd = 0.0828932337666744

YDJ1

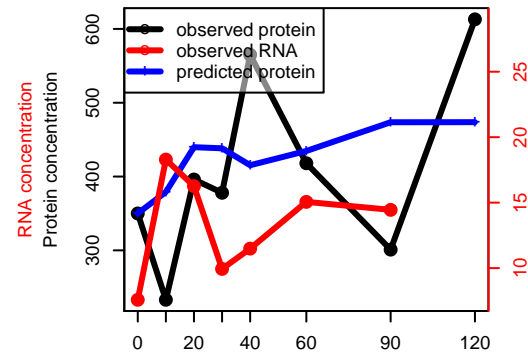

Time (min)  
ks = 1.210707398243 kd = 0.0358678849036932

SSB1

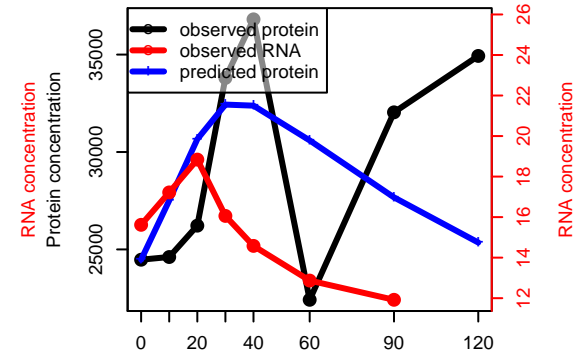

Time (min)  
ks = 73.9800143883461 kd = 0.0350608869218975

SAM1

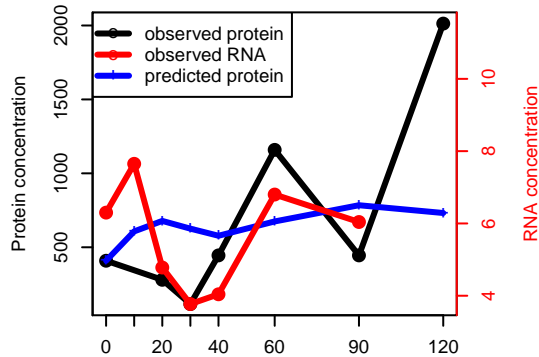

Time (min)  
ks = 6.53998409237107 kd = 0.0506368459090592

ETR1

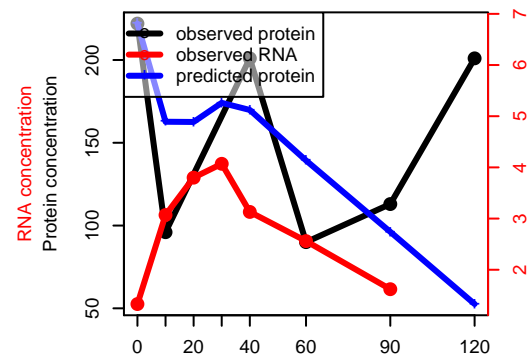

Time (min)  
ks = 3.3638083769222 kd = 0.0723715118581048

LYS2

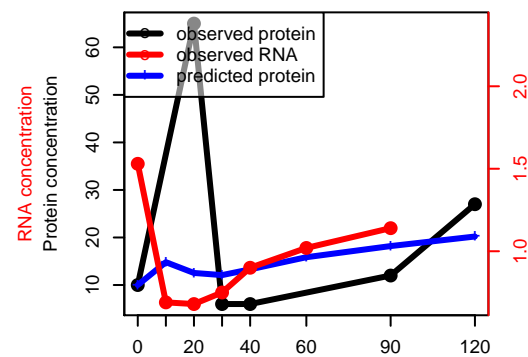

Time (min)  
ks = 1.83641325712962 kd = 0.110515131777655

YRA2

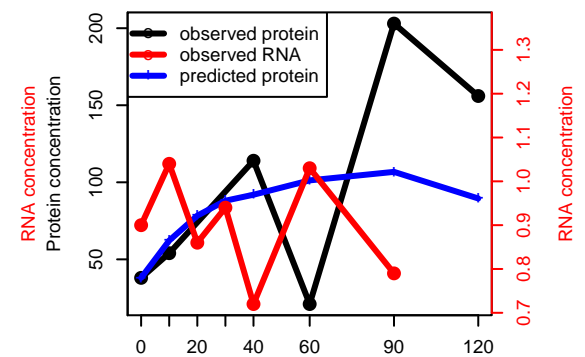

Time (min)  
ks = 4.32282175672722 kd = 0.0353203788900744

NSP1

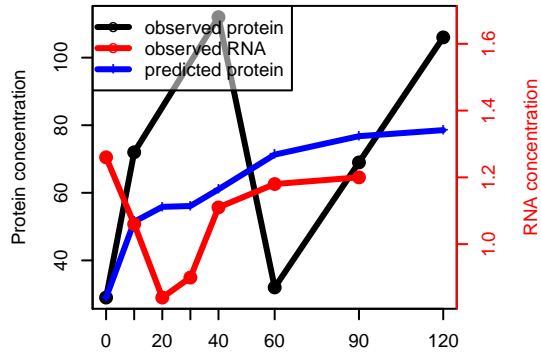

Time (min)  
ks = 4.49483649587754 kd = 0.0702437439996947

LAP3

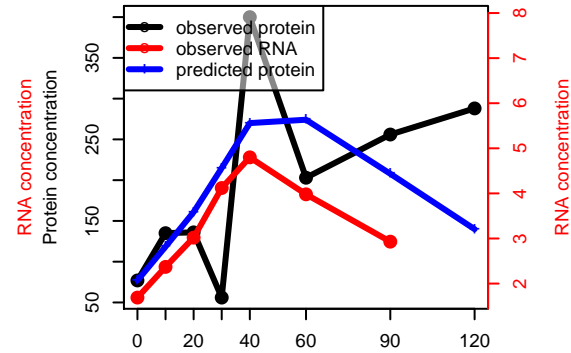

Time (min)  
ks = 7.87498601560501 kd = 0.121571503619634

SHP1

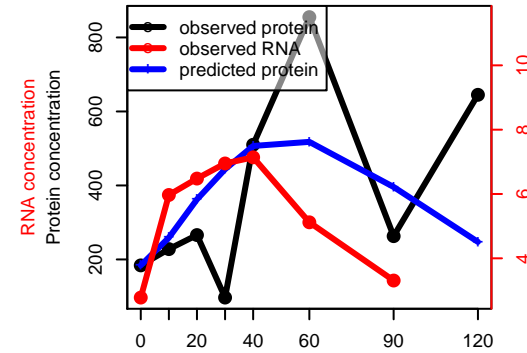

Time (min)  
ks = 3.90514349175516 kd = 0.0447939514674406

ERG10

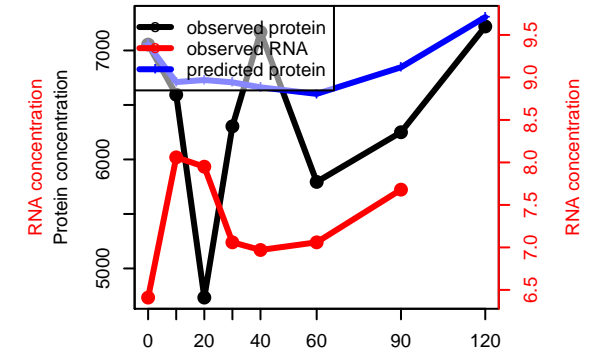

Time (min)  
ks = 41.3156517542315 kd = 0.0488907461932241

RPS10A

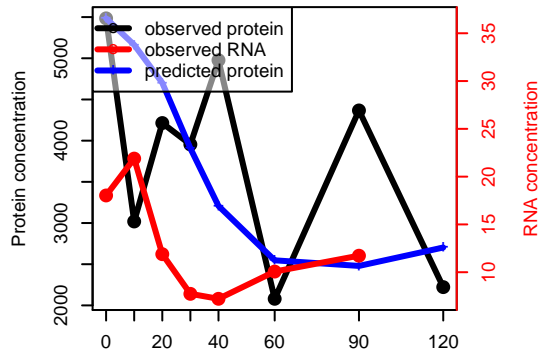

Time (min)  
ks = 8.22477829551007 kd = 0.0371099571343906

RAS2

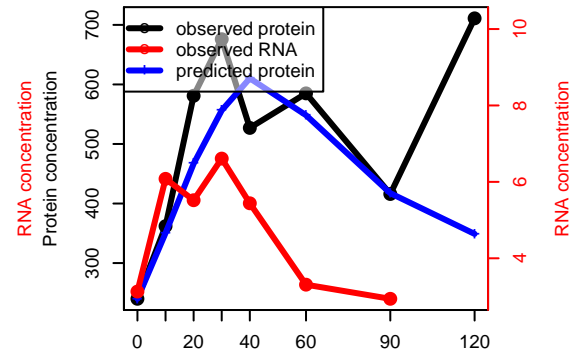

Time (min)  
ks = 5.04310139136144 kd = 0.0424284269123881

SBP1

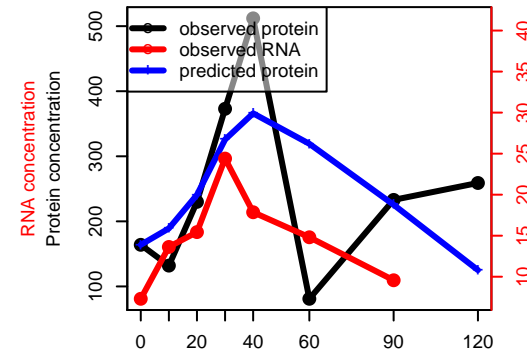

Time (min)  
ks = 1.5359654715058 kd = 0.0796113854461616

ARX1

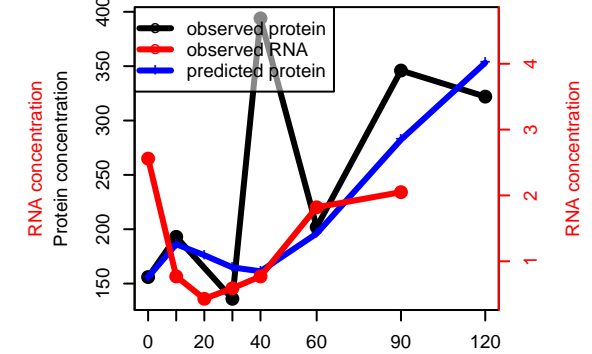

Time (min)  
ks = 3.68494080882608 kd = 0.0175702730233693

PRE10

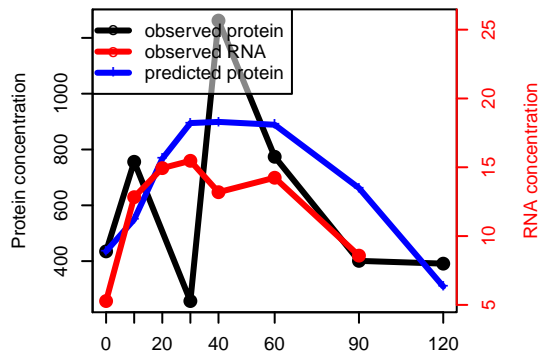

Time (min)  
ks = 6.44796103816128 kd = 0.101653869149169

COX12

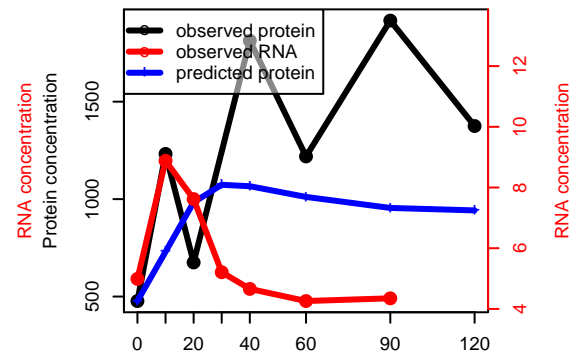

Time (min)  
ks = 6.03272994232793 kd = 0.0280171537008837

CKS1

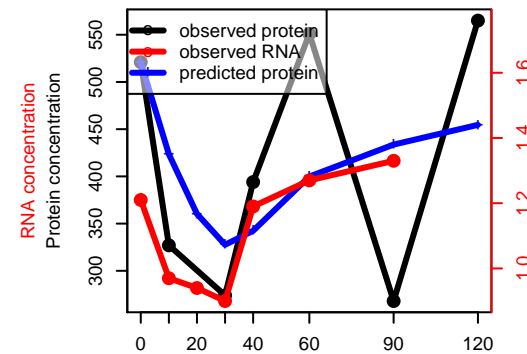

Time (min)  
ks = 30.0693938124708 kd = 0.090340193880446

ERG13

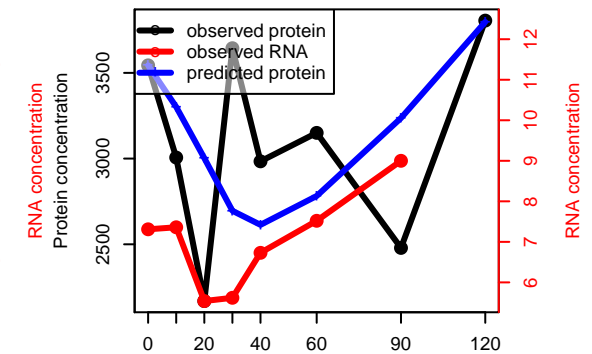

Time (min)  
ks = 20.319373810658 kd = 0.050780221583904

CRN1

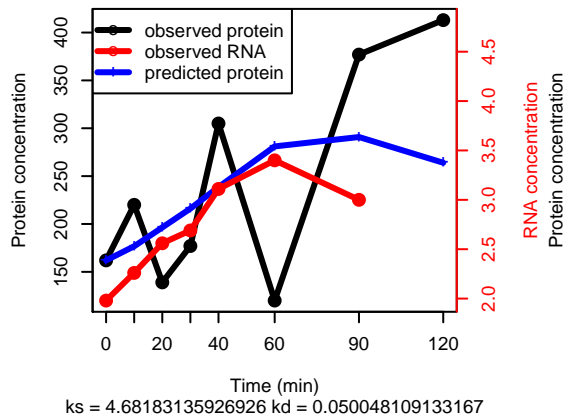

DSK2

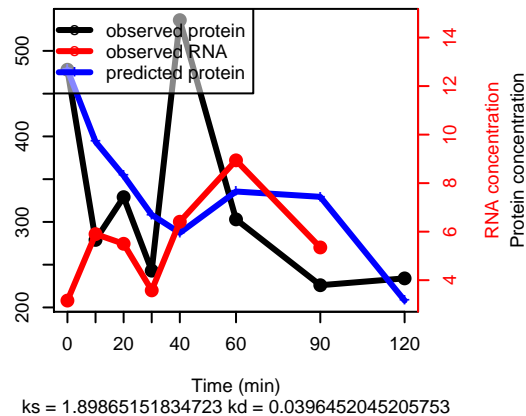

RHR2

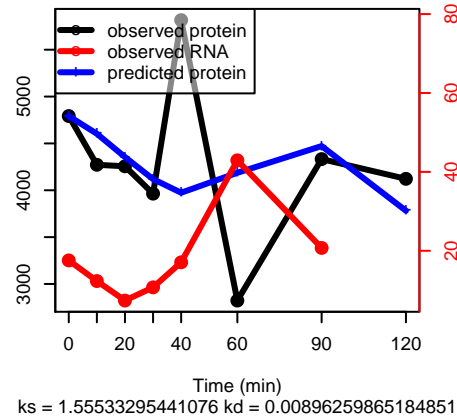

GDH1

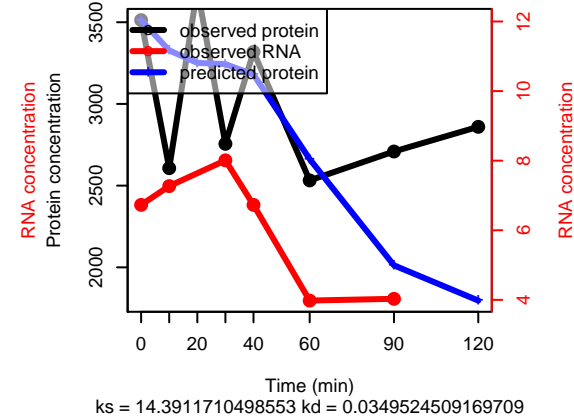

URA2

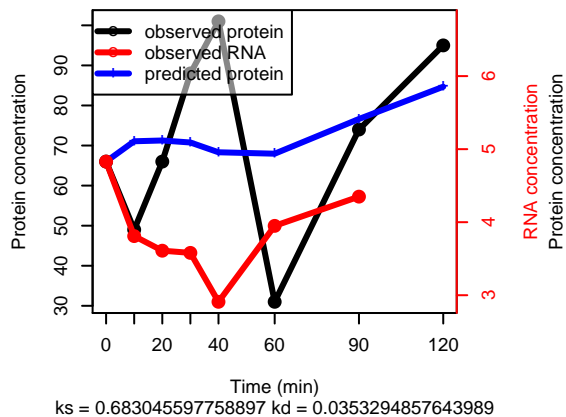

TIM13

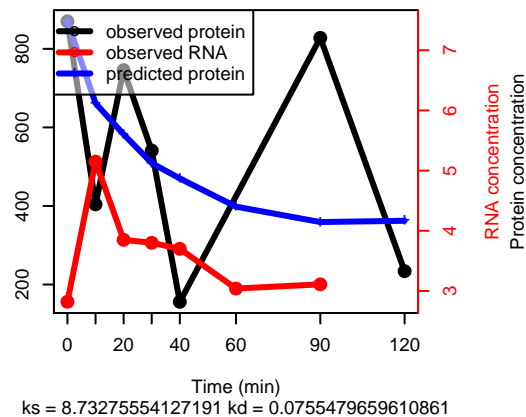

PUT2

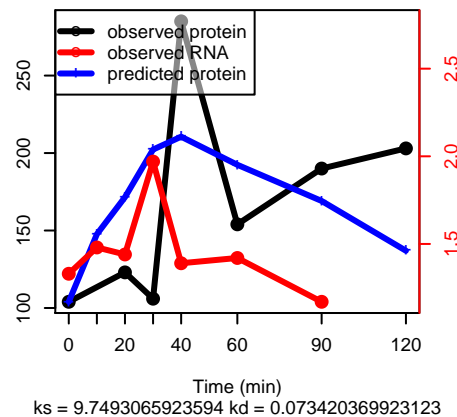

MKT1

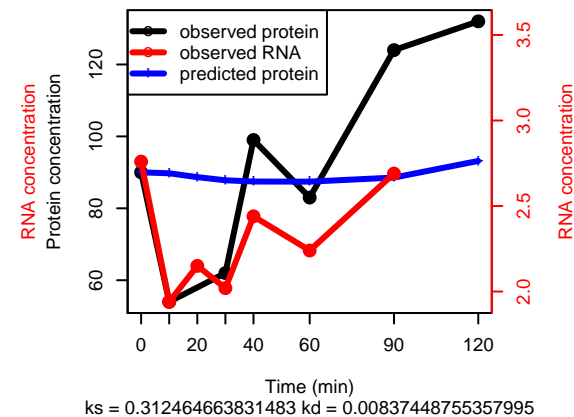

MET3

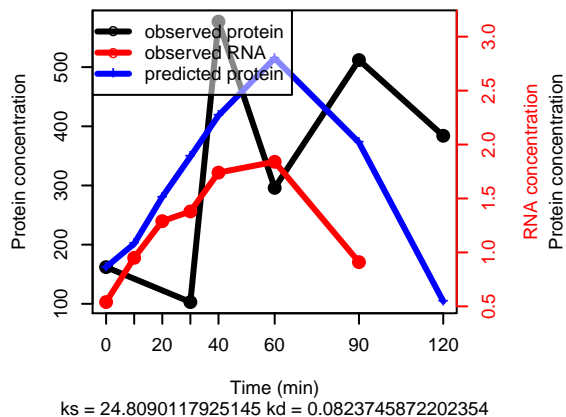

SPT4

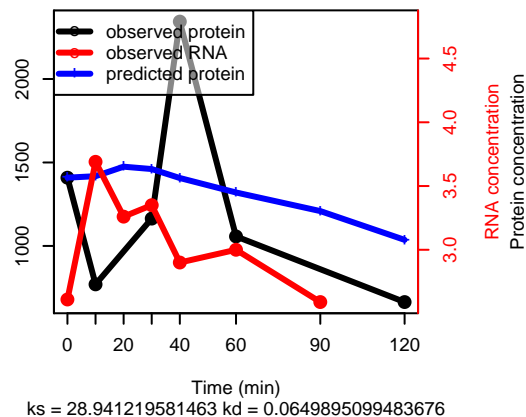

REV3

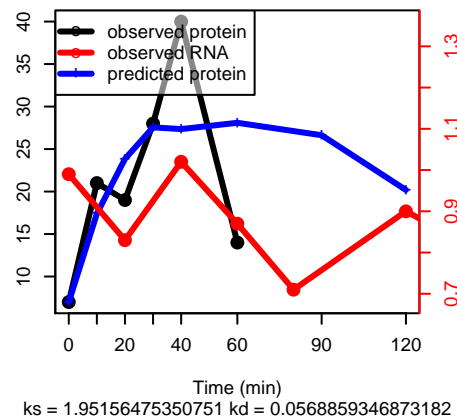

TAO3

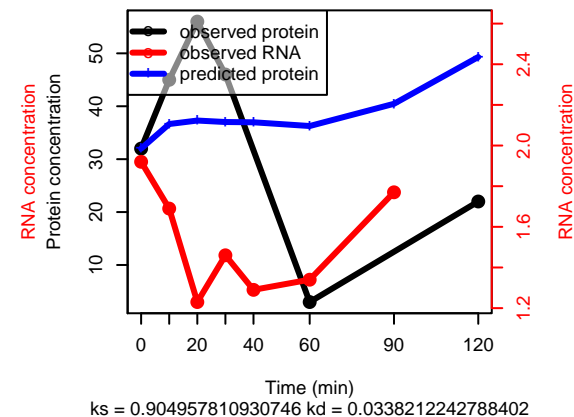



MAP1

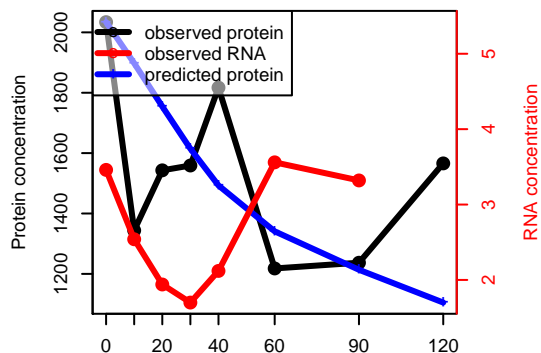

Time (min)  
ks = 3.06376552565599 kd = 0.0115976499892999

NIT3

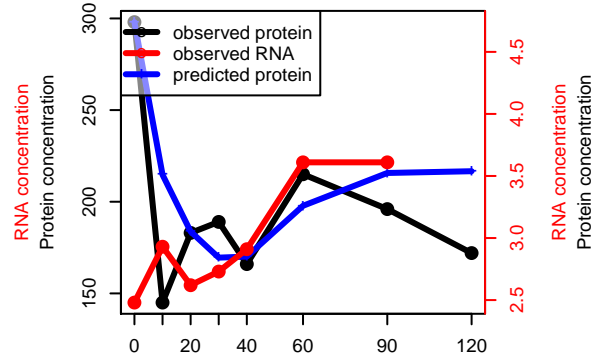

Time (min)  
ks = 5.89239523211361 kd = 0.0979690687618918

ADE2

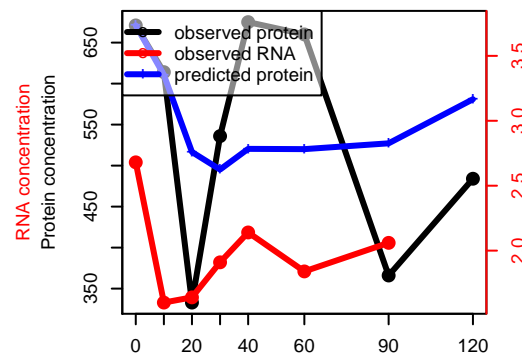

Time (min)  
ks = 20.4444046186593 kd = 0.0760333784788308

AAT2

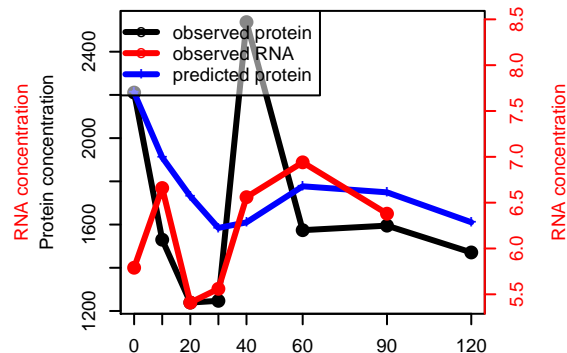

Time (min)  
ks = 21.6108933330951 kd = 0.0811891979224604

RPP2A

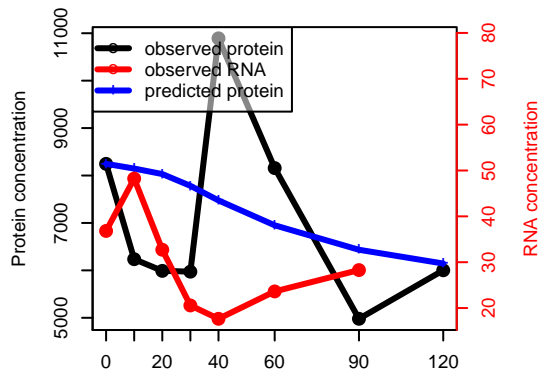

Time (min)  
ks = 1.04643845951173 kd = 0.0066540000053753

RPL7A

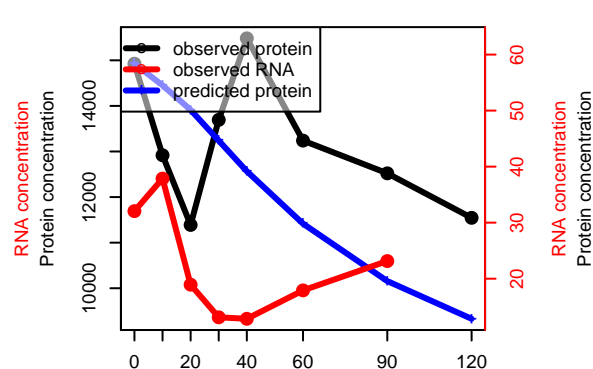

Time (min)  
ks = 1.43397826565194 kd = 0.0066540000053753

ILS1

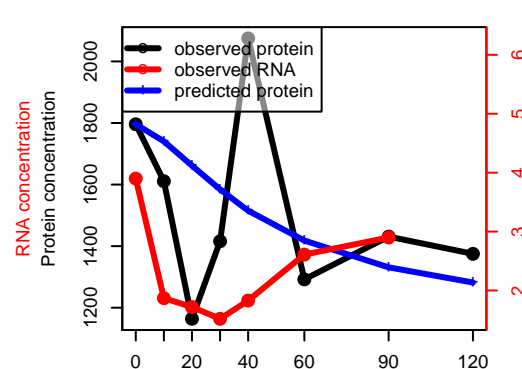

Time (min)  
ks = 2.61019698134225 kd = 0.00738494997534027

SOD2

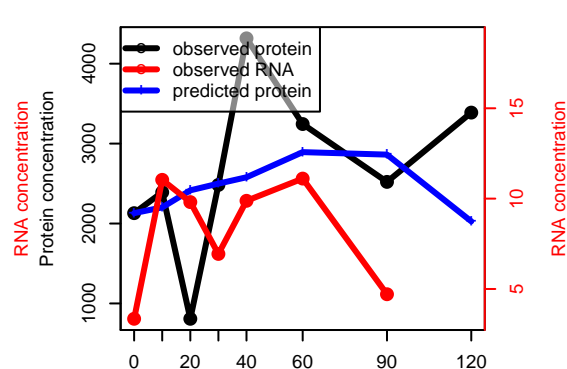

Time (min)  
ks = 5.21469817990285 kd = 0.0142111003304123

SUI1

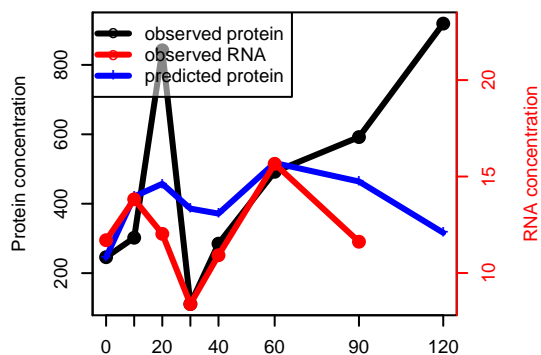

Time (min)  
ks = 5.08346629581524 kd = 0.137656433866032

YKE2

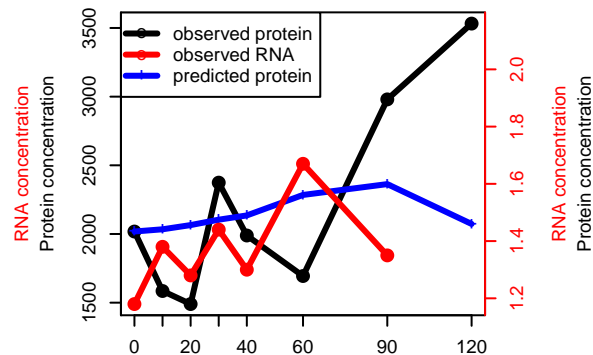

Time (min)  
ks = 52.2074000931903 kd = 0.0322848773579865

SSZ1

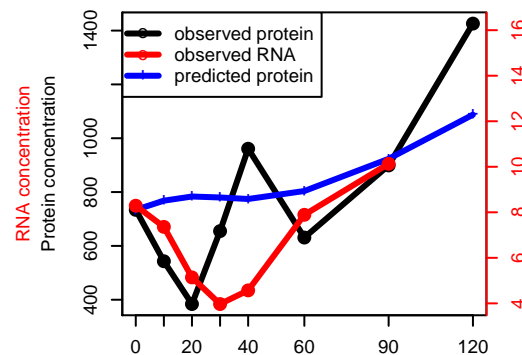

Time (min)  
ks = 1.08003659407964 kd = 0.0066540000053753

MDN1

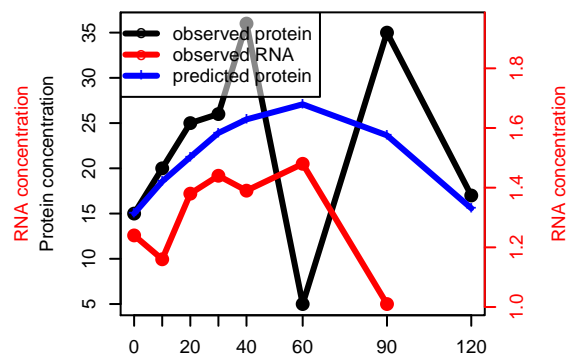

Time (min)  
ks = 1.0905958050843 kd = 0.0561361251395486



SER1

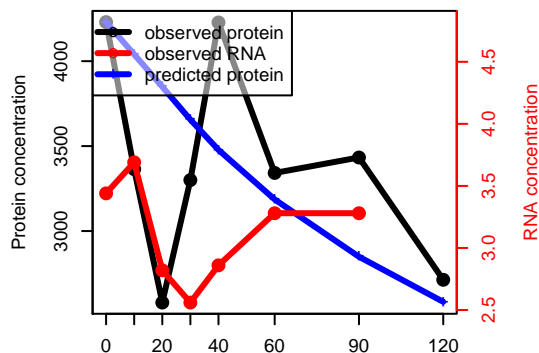

Time (min)  
ks = 3.8618478018902 kd = 0.00793687878849556

RPL28

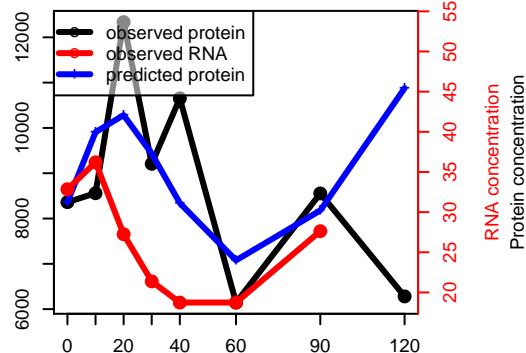

Time (min)  
ks = 19.4332825610822 kd = 0.0564295842790234

RPL3

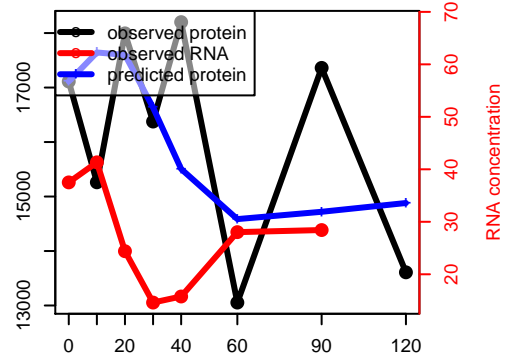

Time (min)  
ks = 7.48098933556538 kd = 0.0140946486721504

SNU13

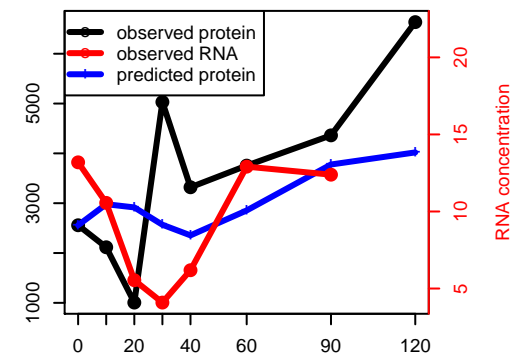

Time (min)  
ks = 11.0734455744394 kd = 0.0318874826113671

VAM6

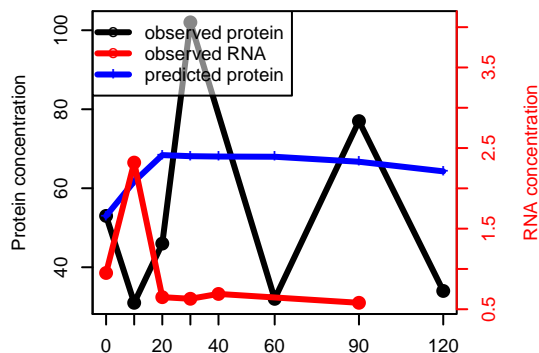

Time (min)  
ks = 0.807099133749312 kd = 0.00792529724547794

BNA1

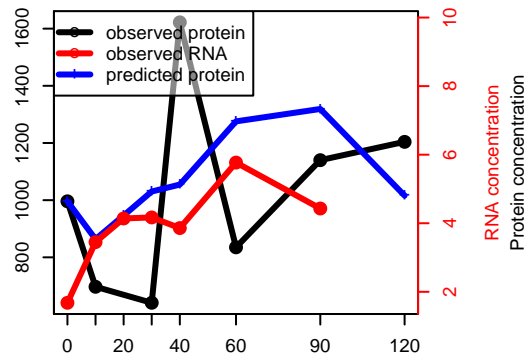

Time (min)  
ks = 17.4411596850291 kd = 0.0645765568479002

AIP1

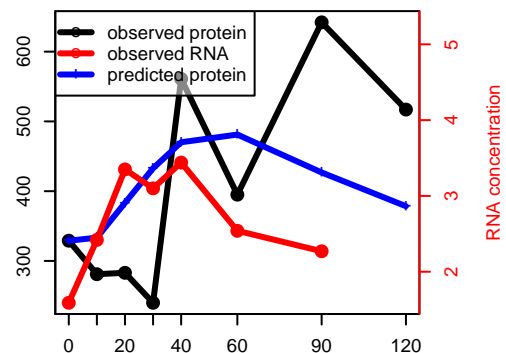

Time (min)  
ks = 6.37677227515655 kd = 0.0377330603531131

RPS21A

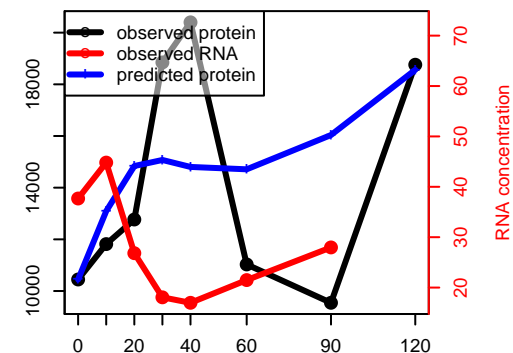

Time (min)  
ks = 10.3552194766376 kd = 0.013875721192816

HNT1

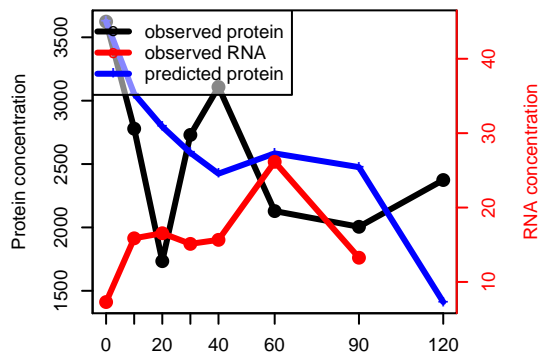

Time (min)  
ks = 4.09266664687828 kd = 0.0316591413607616

HRI1

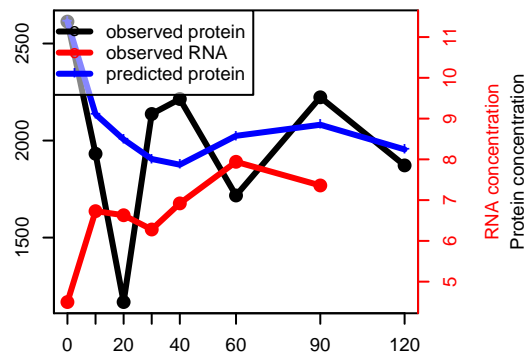

Time (min)  
ks = 17.434631261813 kd = 0.0627914549939351

BNA5

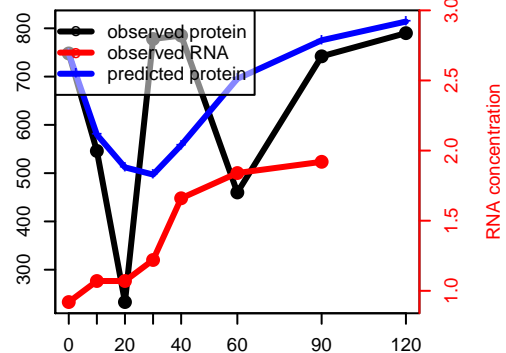

Time (min)  
ks = 30.1184148207943 kd = 0.0719257359686422

MET17

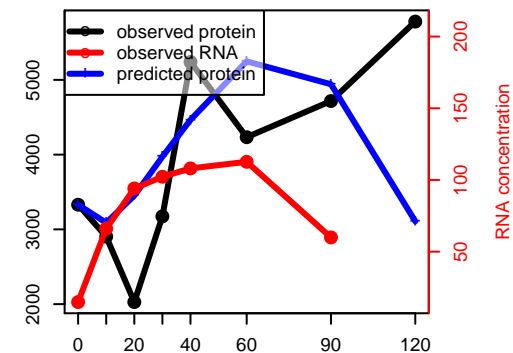

Time (min)  
ks = 1.59819082006589 kd = 0.0282751422901157

PDC5

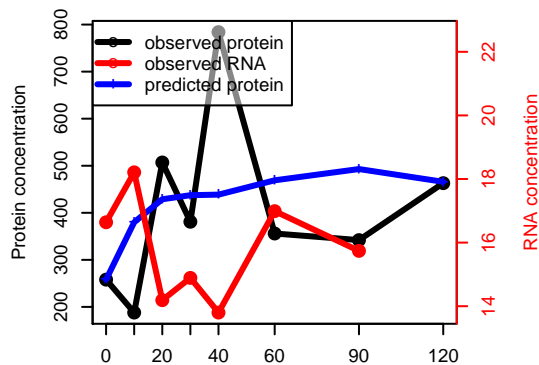

MAE1

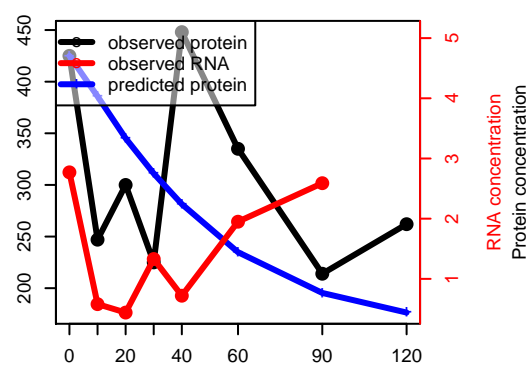

NCB2

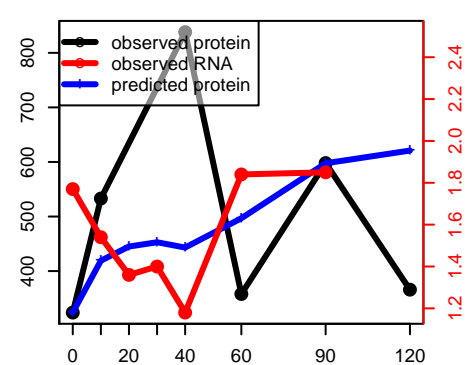

NUP170

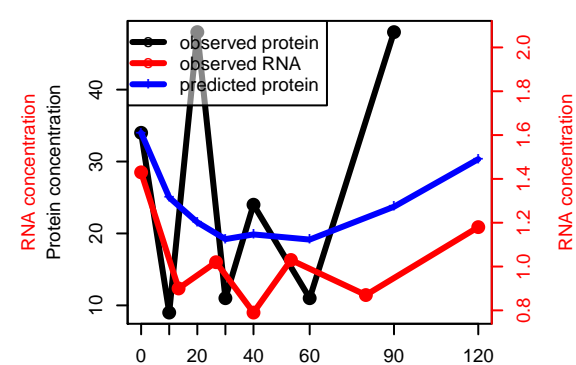

SEC13

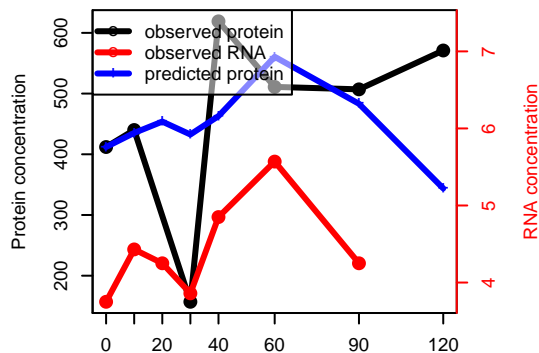

CYS3

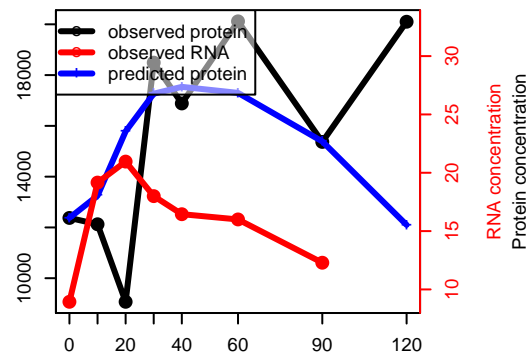

DYS1

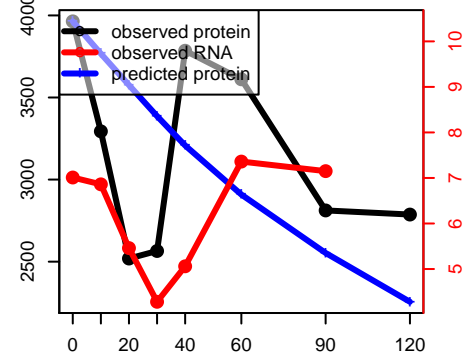

FUM1

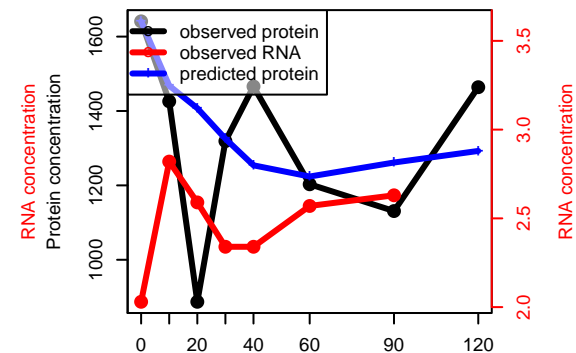

RPS21B

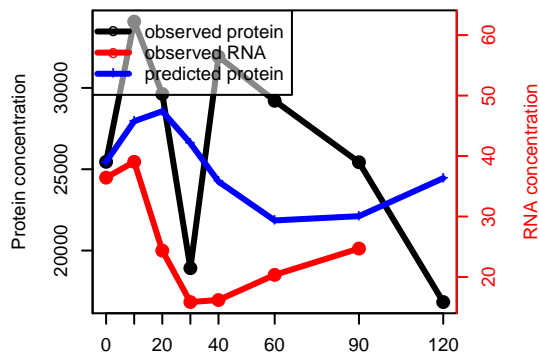

EFT2

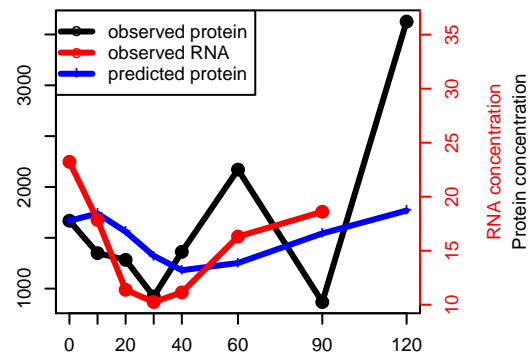

RAD23

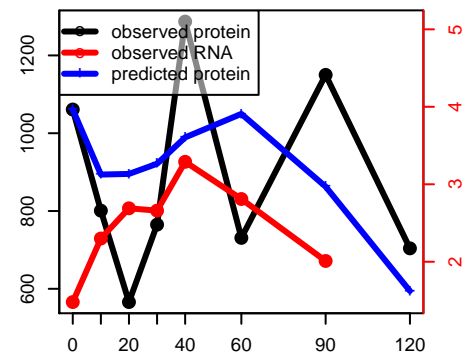

PYC2

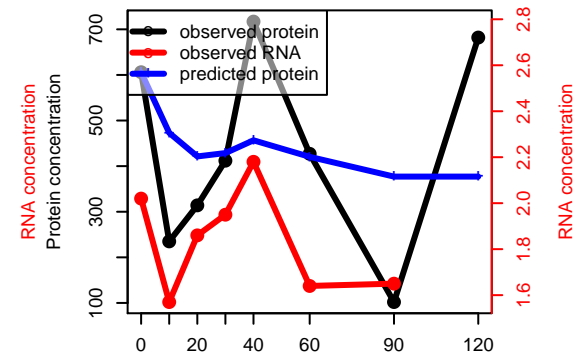

MEC1

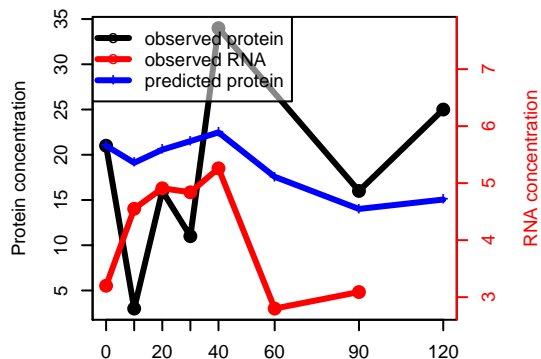

Time (min)  
ks = 0.436595710111392 kd = 0.0967164566589621

RPL8A

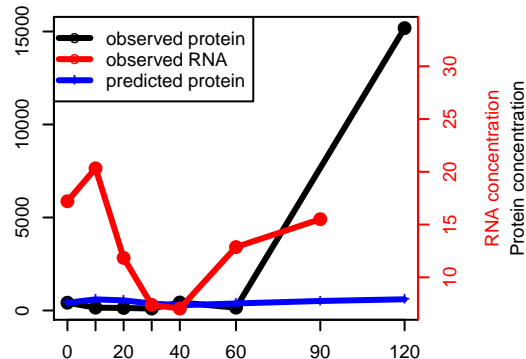

Time (min)  
ks = 4.66103066864992 kd = 0.135141082714204

MXR1

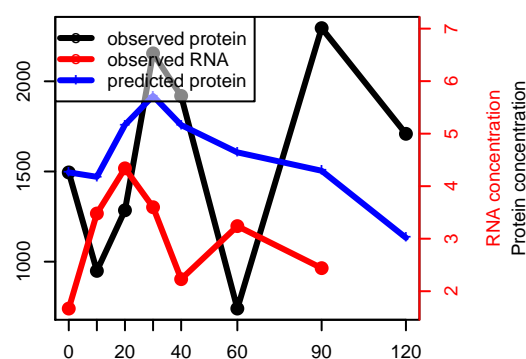

Time (min)  
ks = 30.4552433695929 kd = 0.056267026173978

RPP0

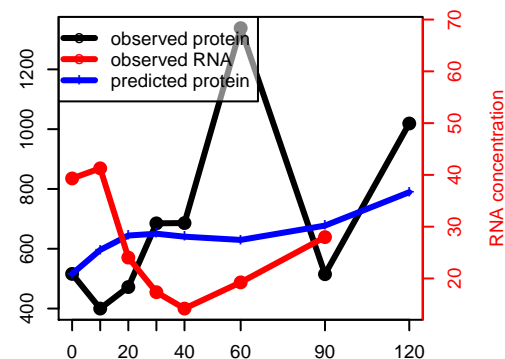

Time (min)  
ks = 0.331999043000428 kd = 0.00965110977128525

RPL13A

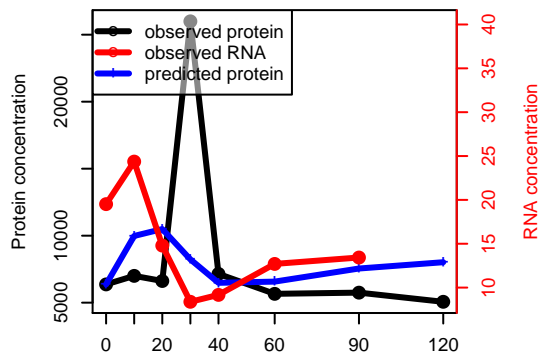

Time (min)  
ks = 47.1218470905933 kd = 0.0816729494213625

IMD3

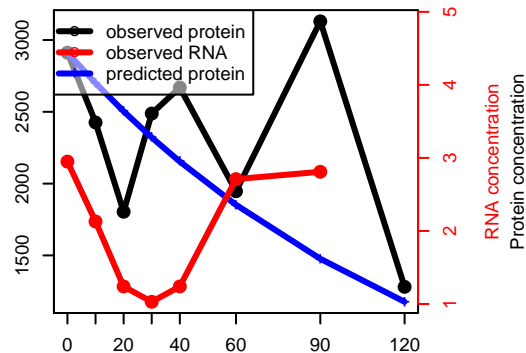

Time (min)  
ks = 0 kd = 0.00755778521246317

PRE9

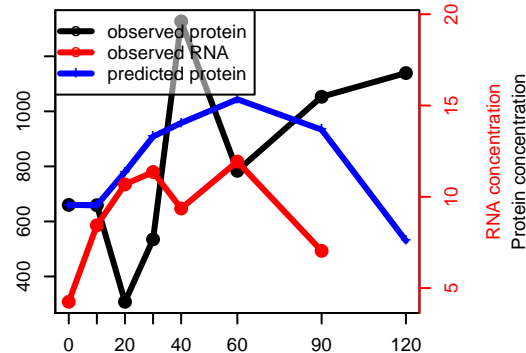

Time (min)  
ks = 4.87580285217235 kd = 0.0482730015956531

YLR179C

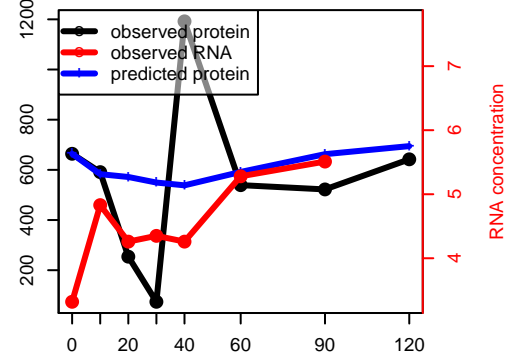

Time (min)  
ks = 10.5958421510997 kd = 0.0847791282487044

RPL21A

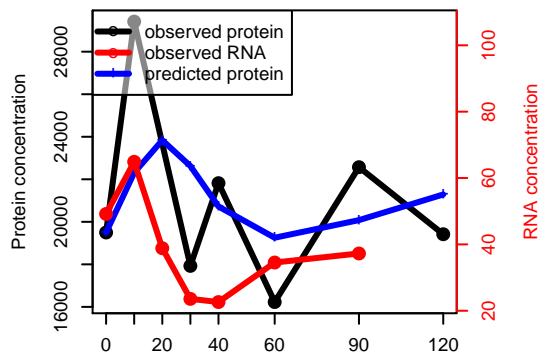

Time (min)  
ks = 13.2937511660007 kd = 0.0229308334257491

TRR2

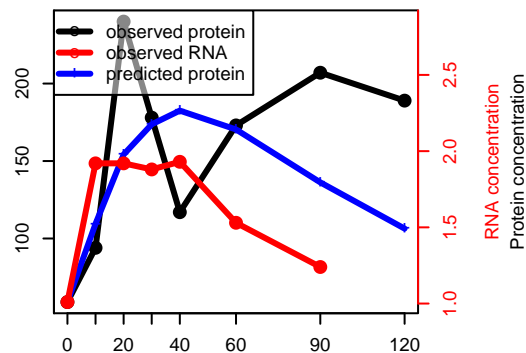

Time (min)  
ks = 7.68546503283786 kd = 0.0760163078924807

NFU1

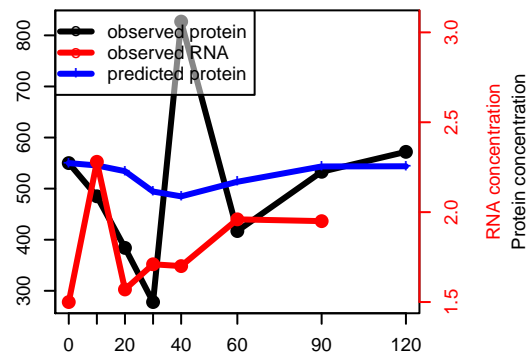

Time (min)  
ks = 21.7171020188525 kd = 0.0777849750650062

PRO2

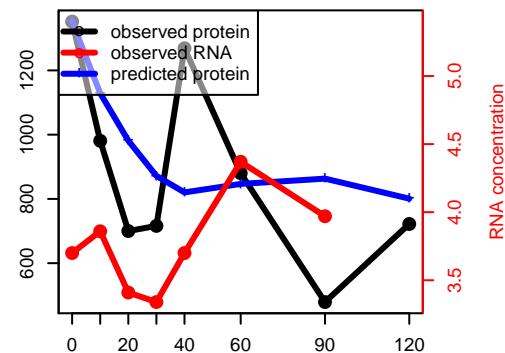

Time (min)  
ks = 10.750852089014 kd = 0.0511467624157451

RK11

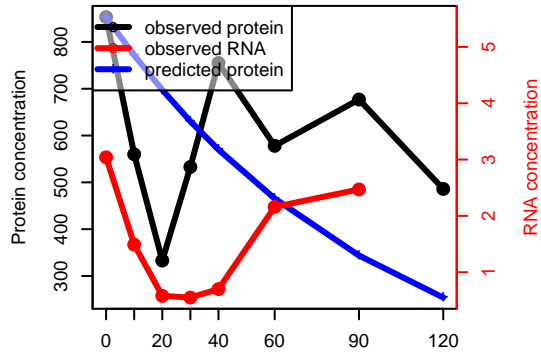

Time (min)  
ks = 0 kd = 0.0101109949826552

ILV3

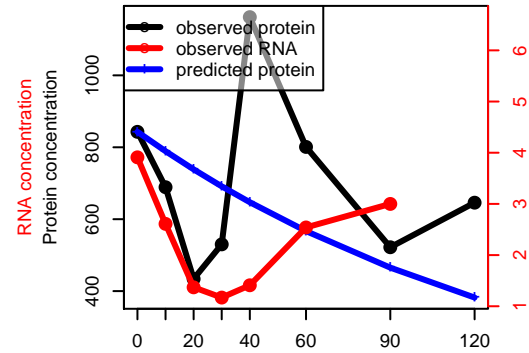

Time (min)  
ks = 0.0115760943977623 kd = 0.006654000053753

NCL1

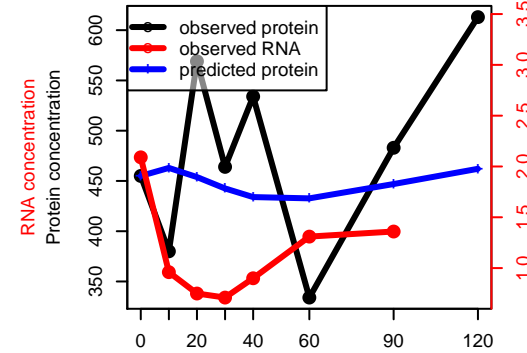

Time (min)  
ks = 2.53732189025999 kd = 0.006654000053753

HOR2

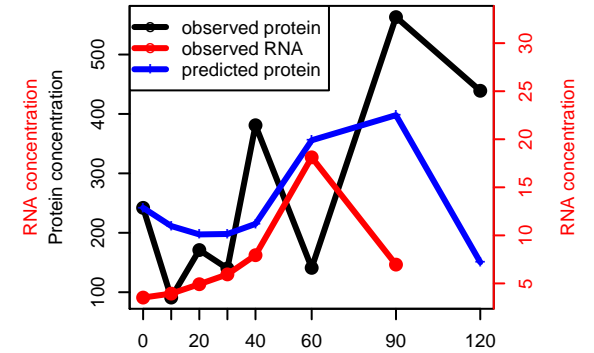

Time (min)  
ks = 1.25794565264586 kd = 0.0344266287013365

YMR099C

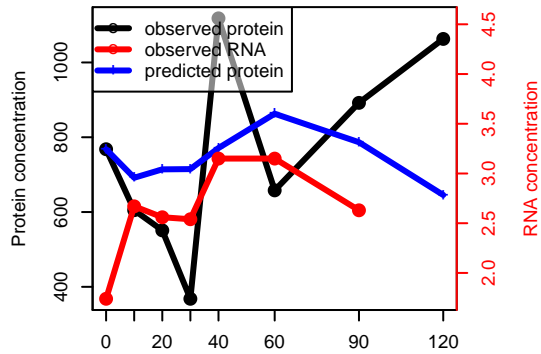

Time (min)  
ks = 24.5496031431528 kd = 0.0874514208307808

BMH1

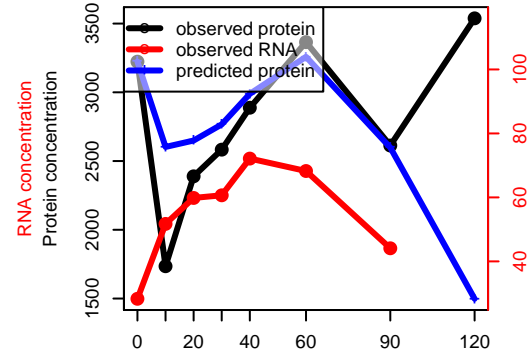

Time (min)  
ks = 3.35566683758379 kd = 0.0697352706253776

FPR1

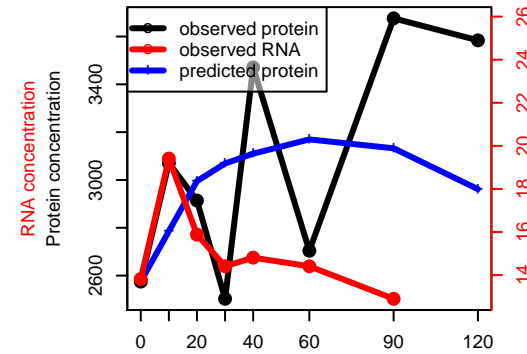

Time (min)  
ks = 4.40165216417291 kd = 0.0195116828375523

NTF2

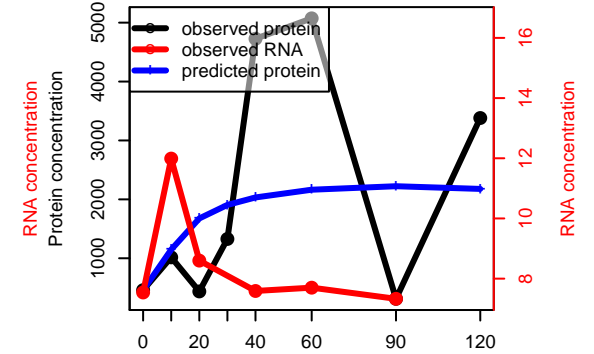

Time (min)  
ks = 9.56617750502645 kd = 0.0313493007992519

CUE5

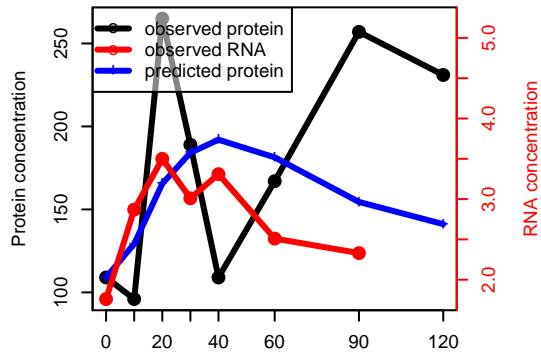

Time (min)  
ks = 4.28131149724075 kd = 0.0676851639129205

RPT5

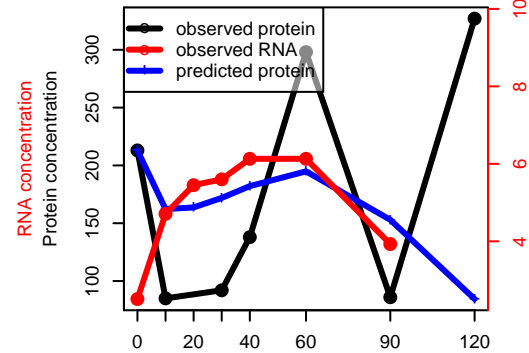

Time (min)  
ks = 2.60729405039193 kd = 0.0806296672286777

GSY2

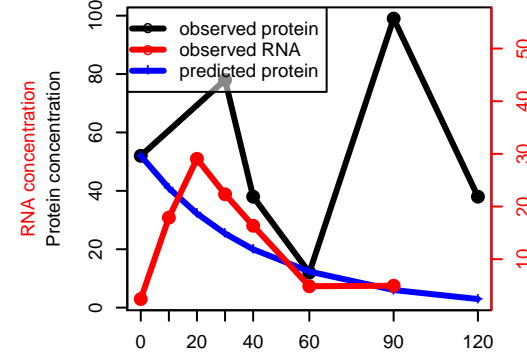

Time (min)  
ks = 0 kd = 0.0239298871652542

UGP1

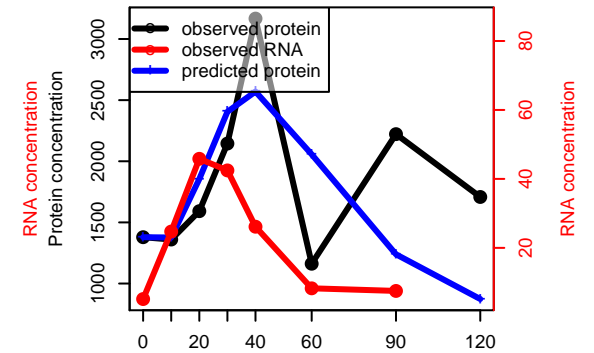

Time (min)  
ks = 2.73720676301721 kd = 0.030785703663738

MIC17

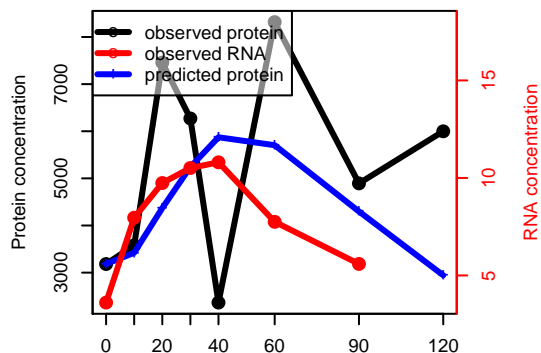

Time (min)  
ks = 36.0173078667674 kd = 0.0579034737578248

IDI1

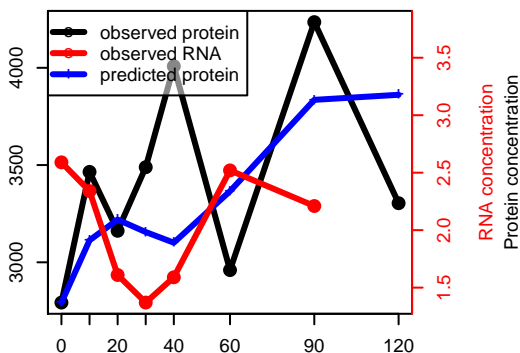

Time (min)  
ks = 34.5354624204924 kd = 0.0179388128297826

RPL17A

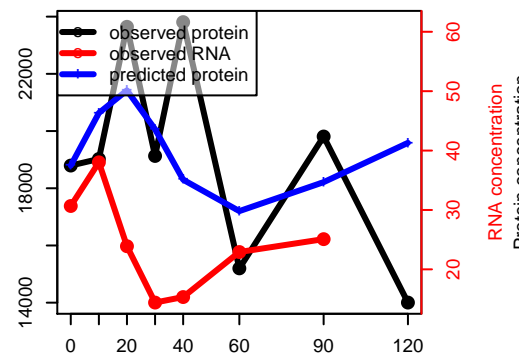

Time (min)  
ks = 19.2604733582591 kd = 0.0243039341557502

GRS1

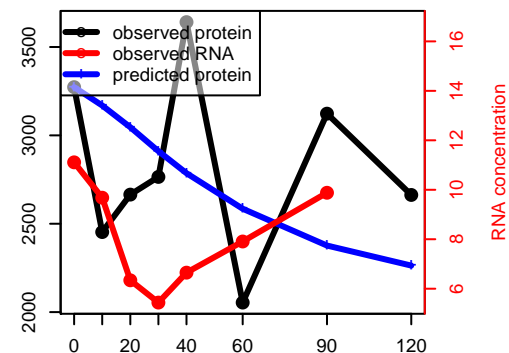

Time (min)  
ks = 1.0661530608968 kd = 0.0066540000053753

ALA1

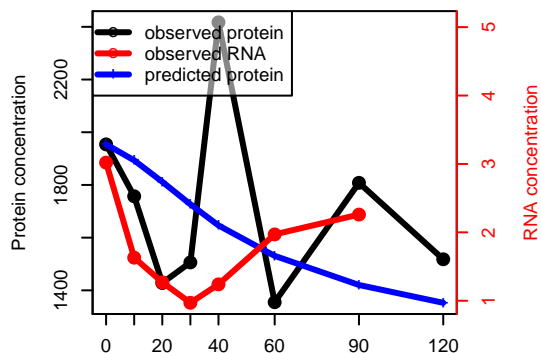

Time (min)  
ks = 2.90505378604474 kd = 0.0066540000053753

MES1

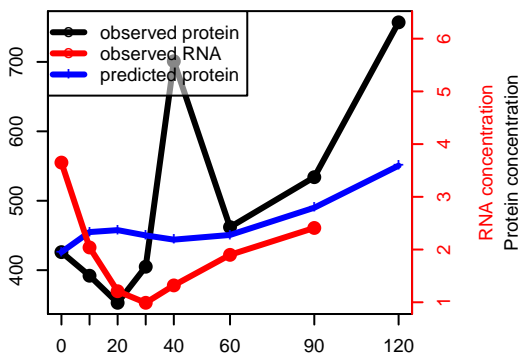

Time (min)  
ks = 2.04797265404426 kd = 0.0066540000053753

MGE1

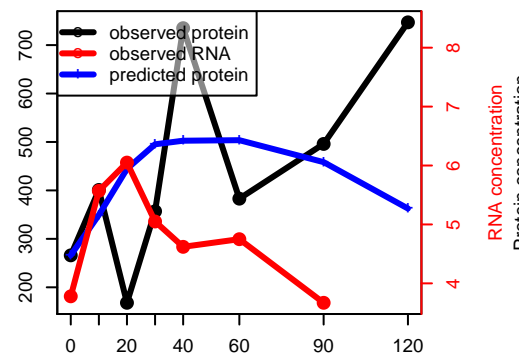

Time (min)  
ks = 4.53256320544181 kd = 0.0422474803128989

LAP2

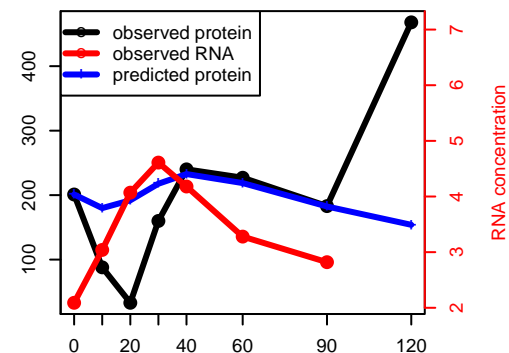

Time (min)  
ks = 3.1440132721062 kd = 0.054390233417526

TUP1

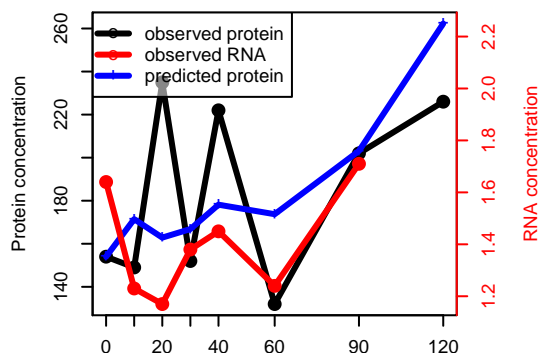

Time (min)  
ks = 11.2667527180553 kd = 0.0860624792058207

VMA1

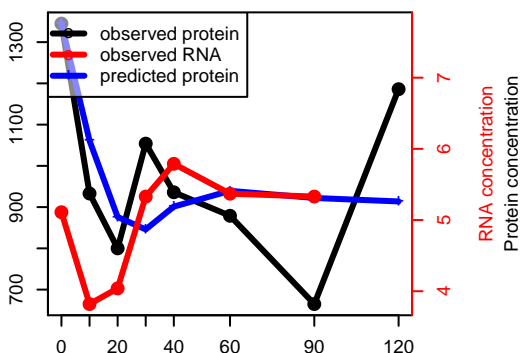

Time (min)  
ks = 11.1448231745278 kd = 0.0651370864246257

PHO13

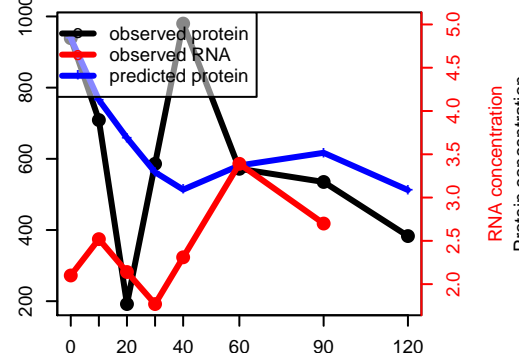

Time (min)  
ks = 10.4515038659991 kd = 0.0492586227003677

BAR1

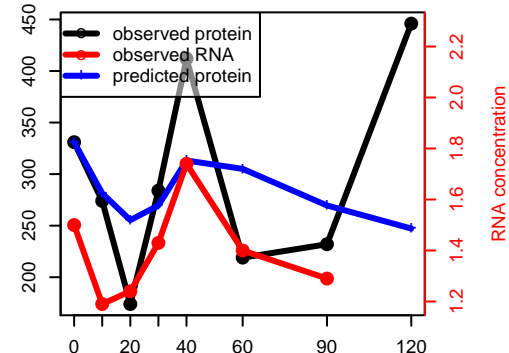

Time (min)  
ks = 27.3492109451441 kd = 0.135751145646906

LYS4

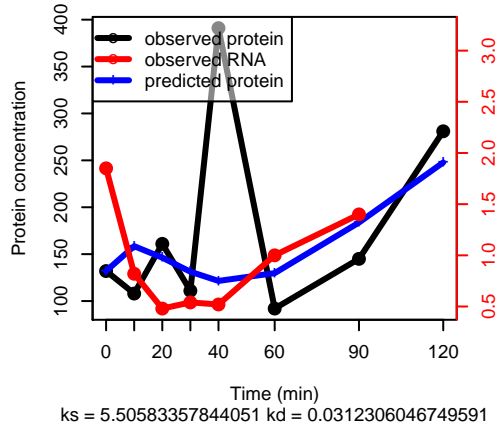

THS1

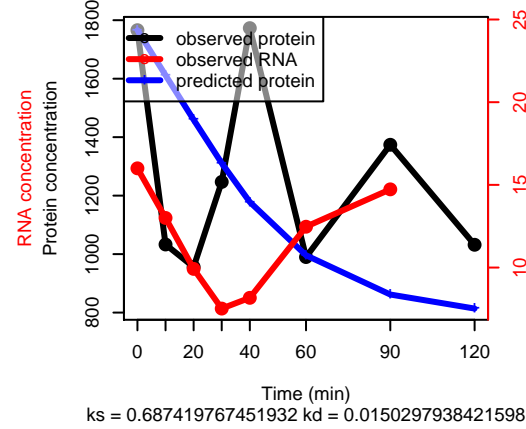

PDX3

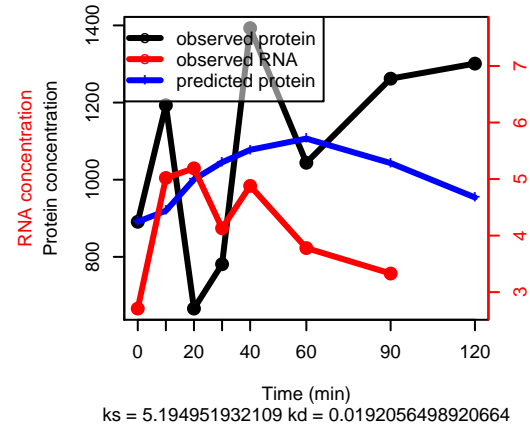

PRO3

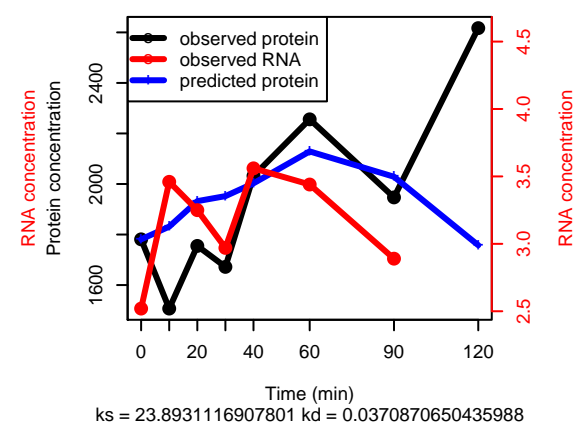

HMO1

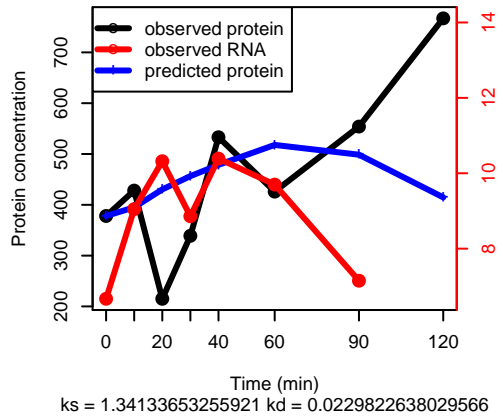

SEC31

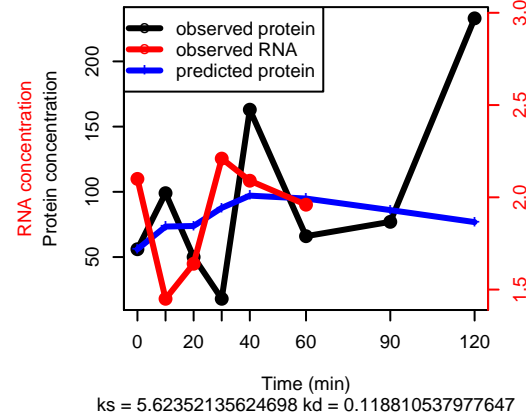

GAD1

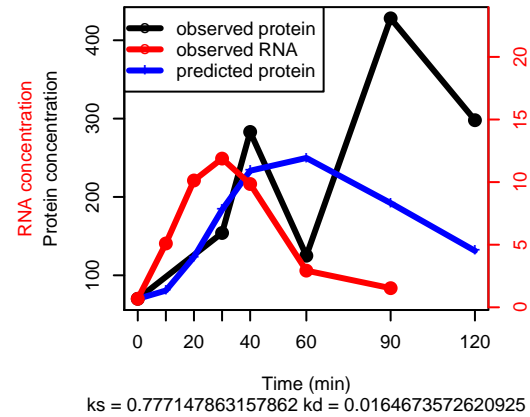

SPP41

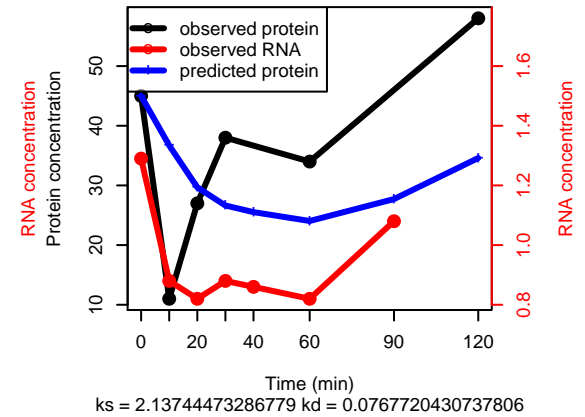

HEM13

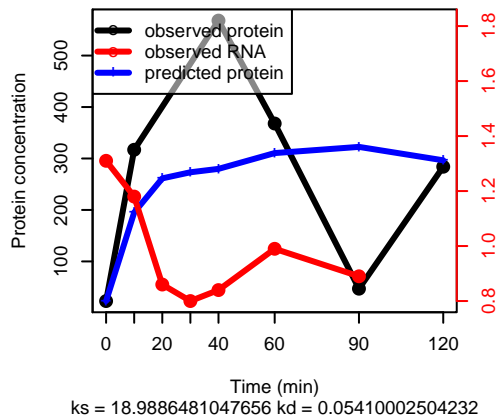

TIF6

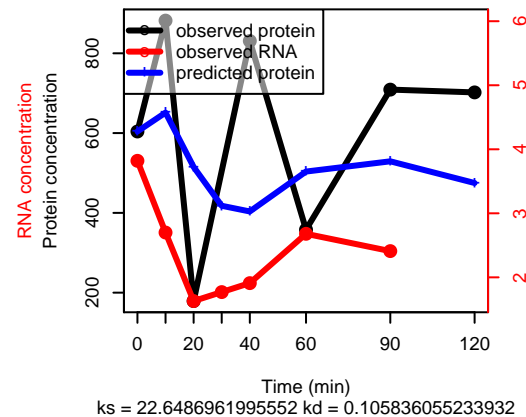

ARC1

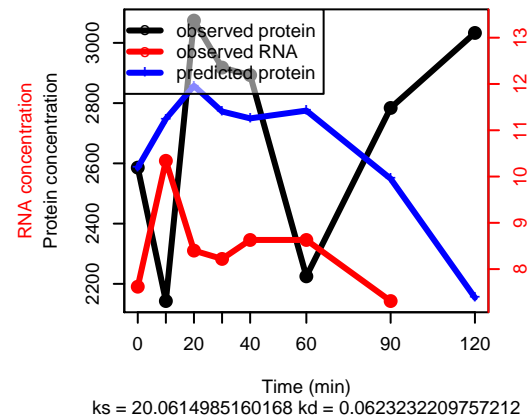

PAB1

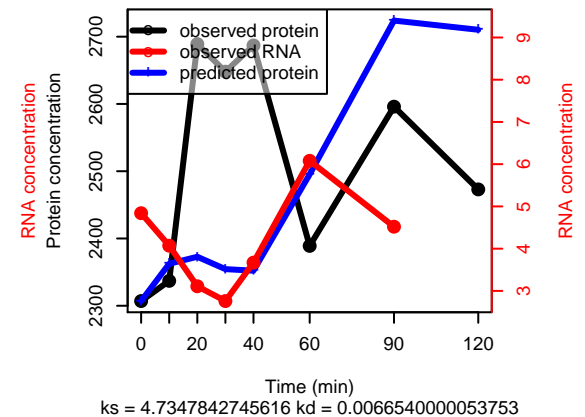



RPP1A

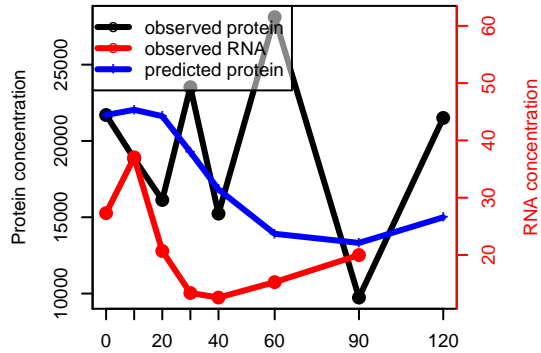

Time (min)  
ks = 20.1673798081797 kd = 0.0282995188781494

HTB2

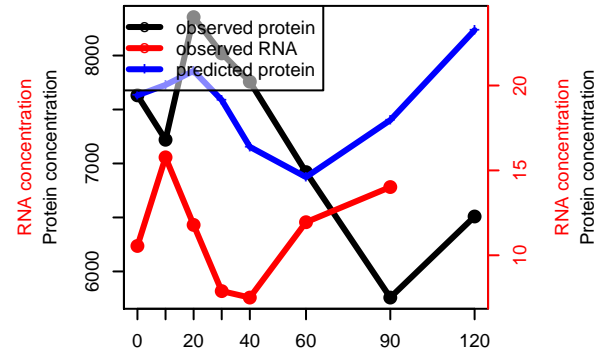

Time (min)  
ks = 10.6981261666532 kd = 0.0171496144982093

PRE5

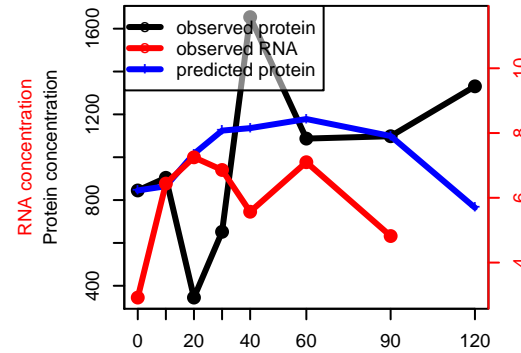

Time (min)  
ks = 8.27475685614113 kd = 0.0441465110660695

BUR6

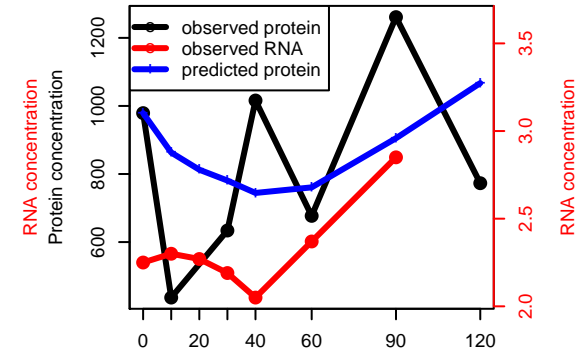

Time (min)  
ks = 28.5713932787753 kd = 0.0838606089094303

YNK1

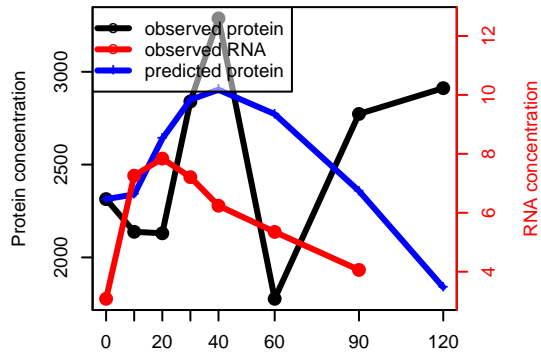

Time (min)  
ks = 14.4195575164892 kd = 0.0316490894282268

VAS1

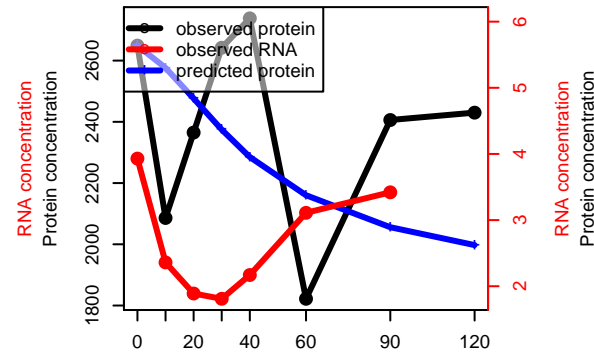

Time (min)  
ks = 3.22187001455529 kd = 0.0066540000053753

ADH1

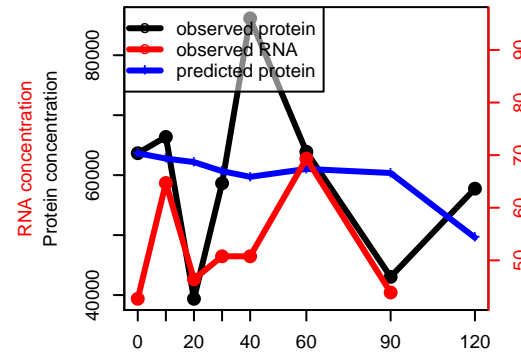

Time (min)  
ks = 17.087562087173 kd = 0.0159891979665258

YOR021C

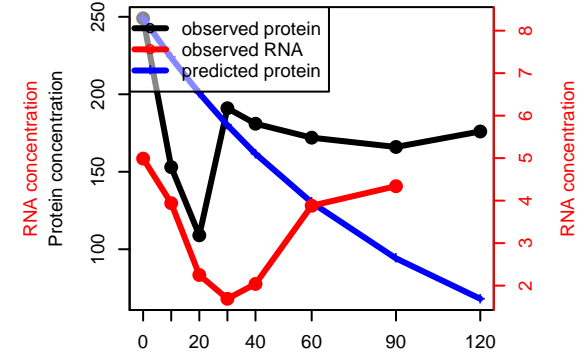

Time (min)  
ks = 0 kd = 0.0108252523400977

YEF3

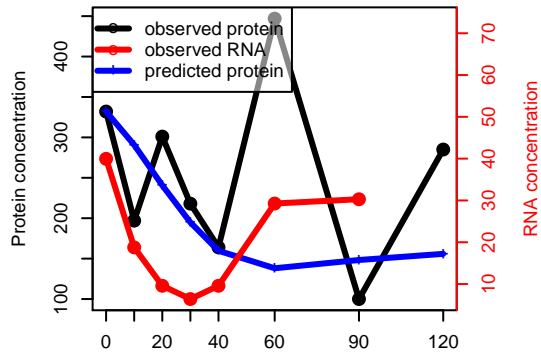

Time (min)  
ks = 0.137744939243097 kd = 0.0261583947469825

CPR3

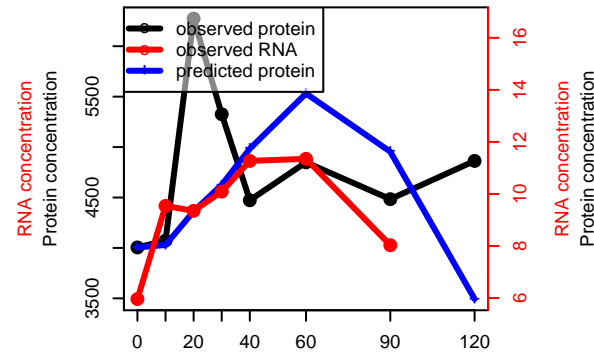

Time (min)  
ks = 26.2048543939743 kd = 0.0508556721354477

SCL1

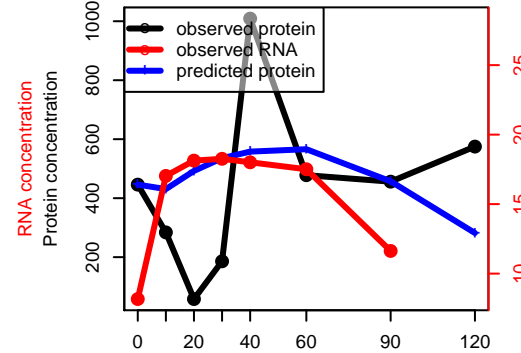

Time (min)  
ks = 2.06775184845502 kd = 0.0651818240785758

PIN2

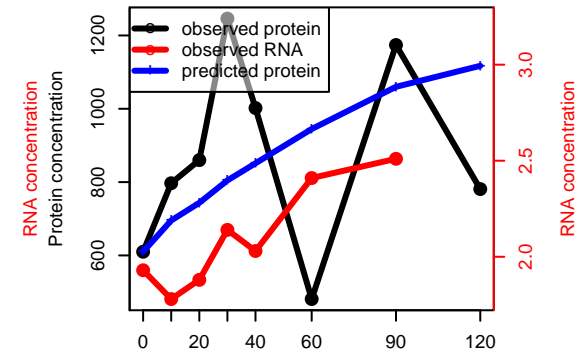

Time (min)  
ks = 24.1579266120276 kd = 0.0550756273862961



YRB2

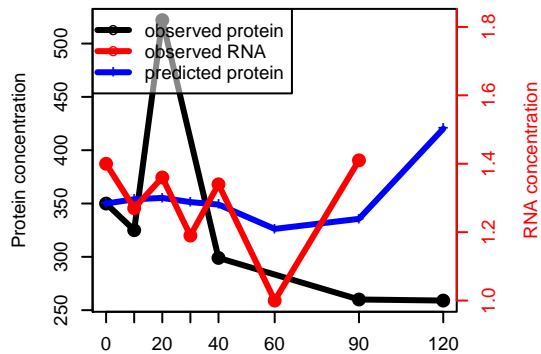

RRS1

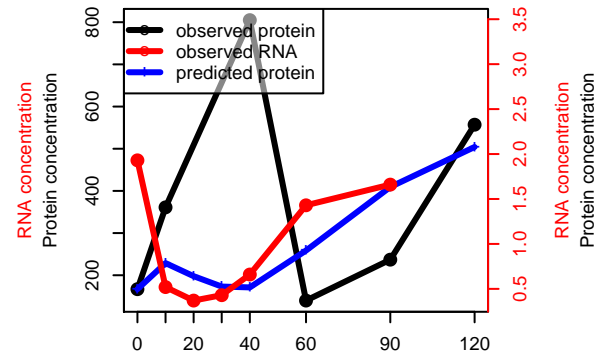

YDR341C

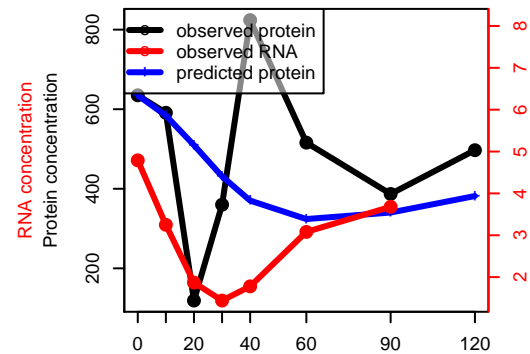

HIS4

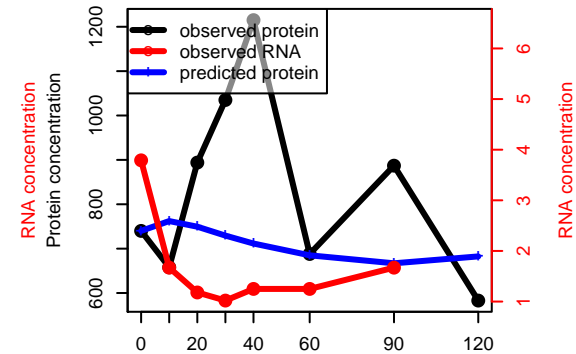

TRM82

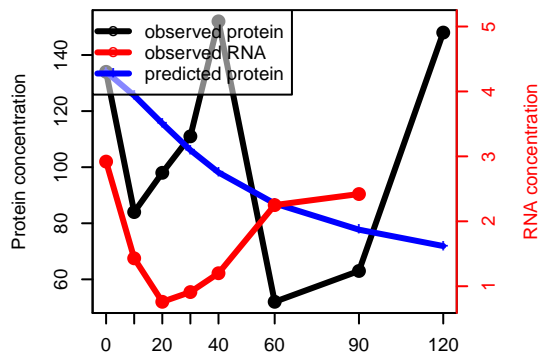

LYS9

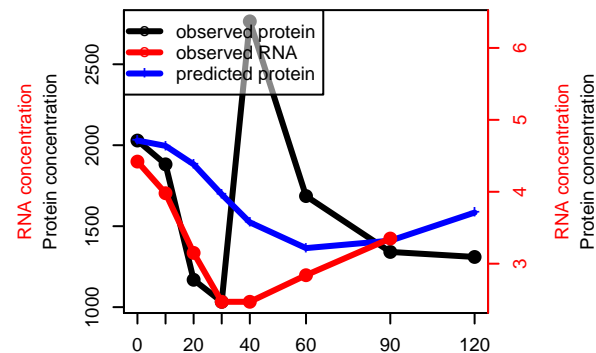

SES1

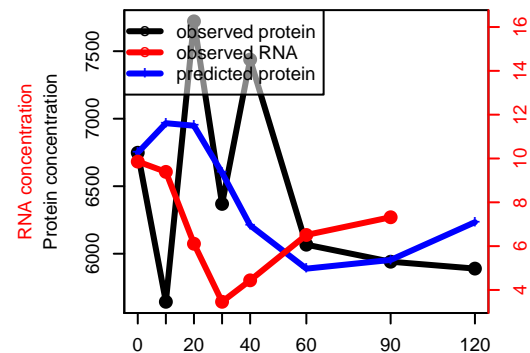

PRE8

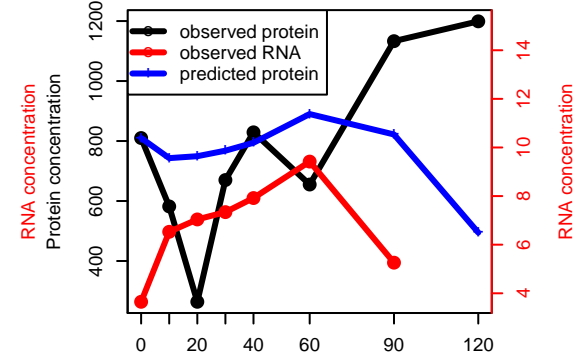

NOP12

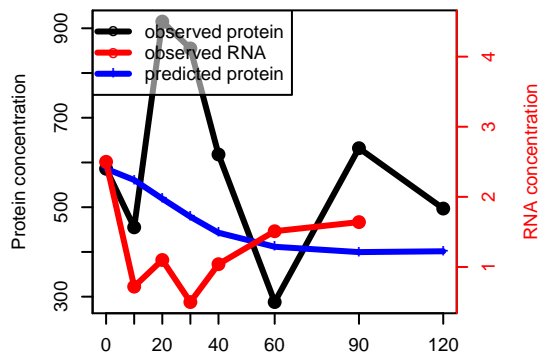

KGD1

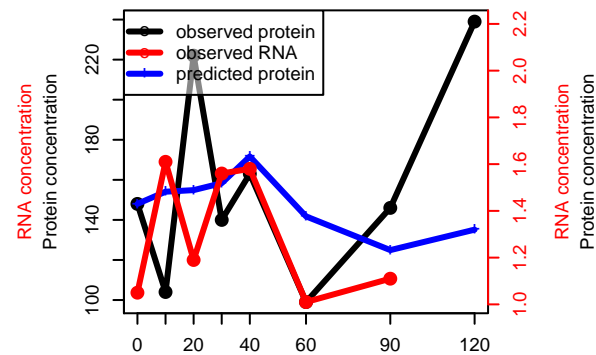

CPA2

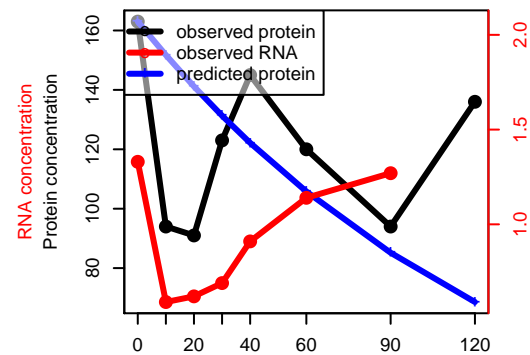

DYN1

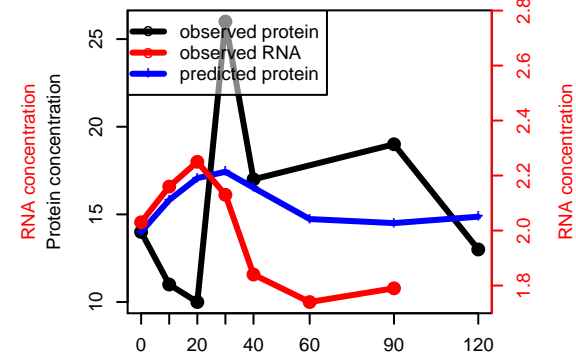

DAK1

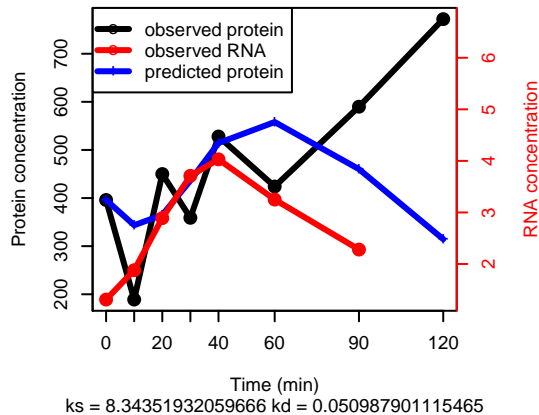

RPS23A

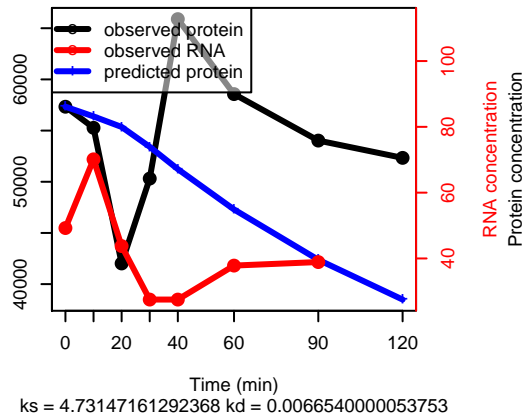

TEF4

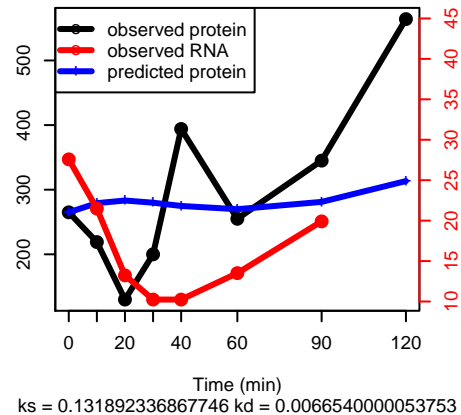

ERG20

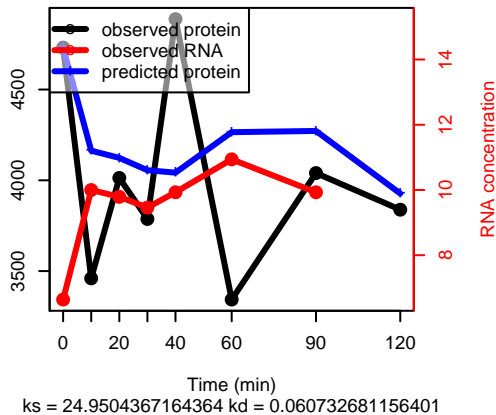

RPE1

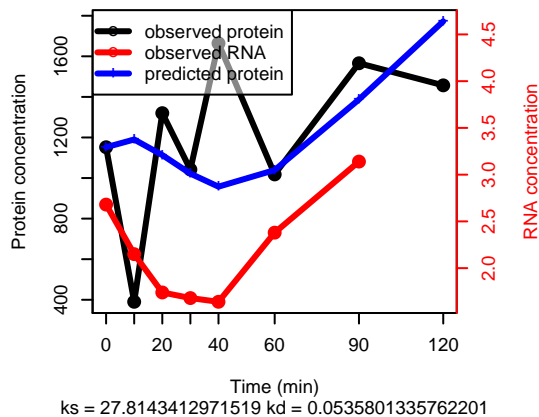

MNP1

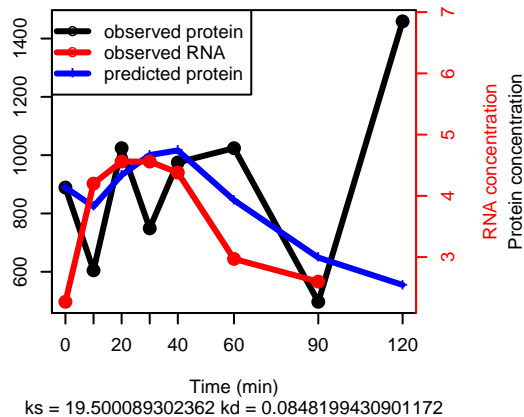

GLO2

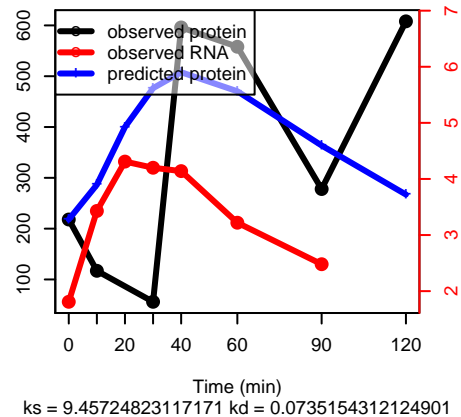

PAA1

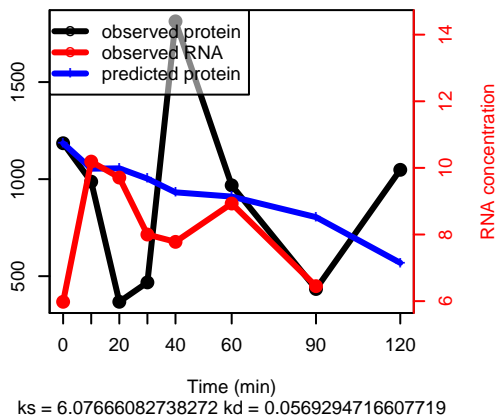

QNS1

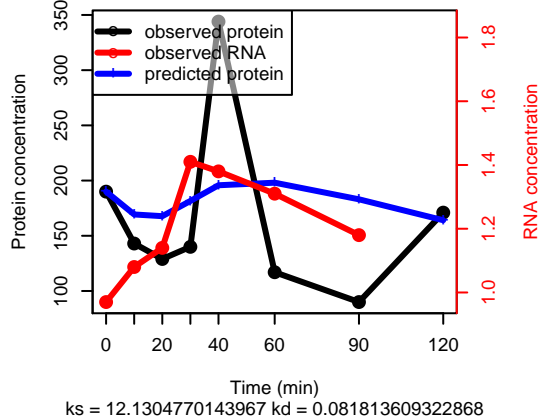

KGD2

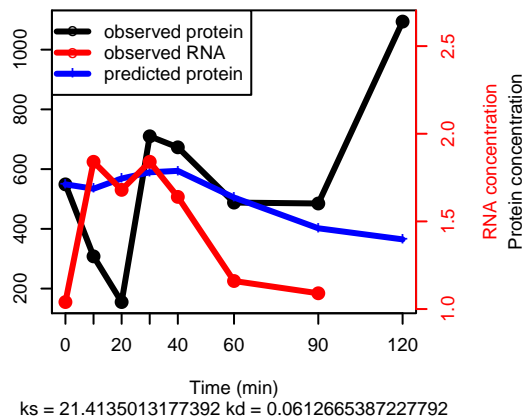

MMF1

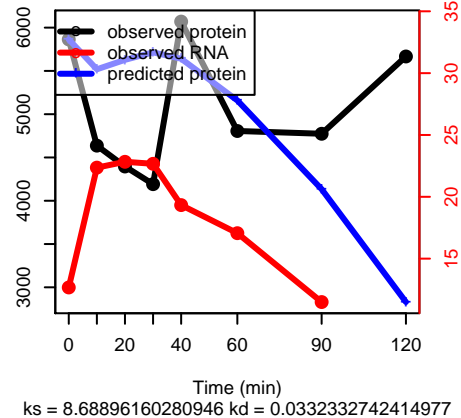

OYE2

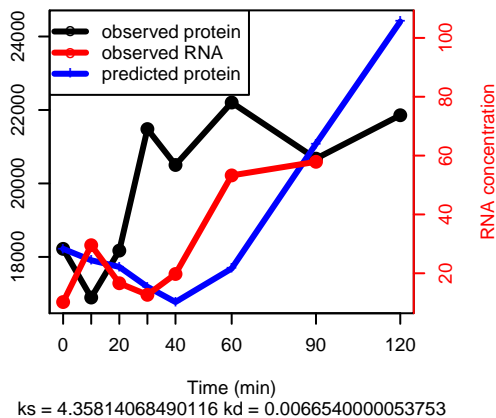

NAP1

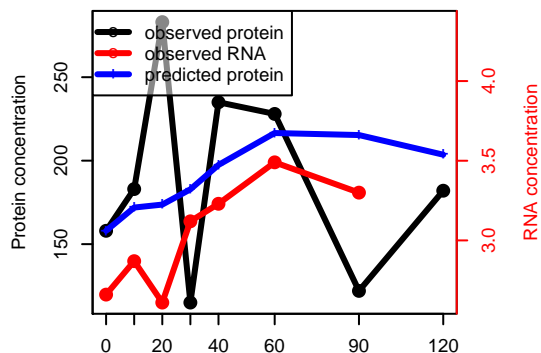

Time (min)  
ks = 6.96647226243035 kd = 0.10830774602599

RPA135

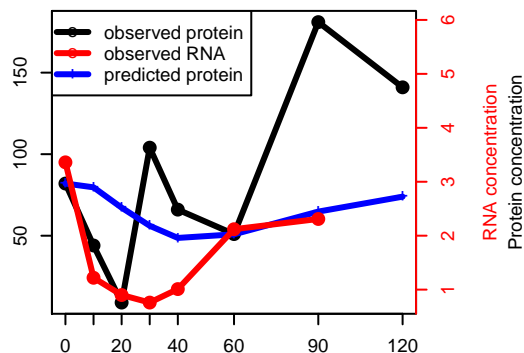

Time (min)  
ks = 1.06763725659909 kd = 0.0324356791532827

SEC17

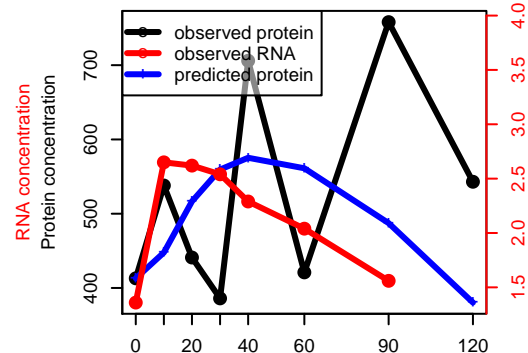

Time (min)  
ks = 8.94421360392583 kd = 0.0343232922501672

ADO1

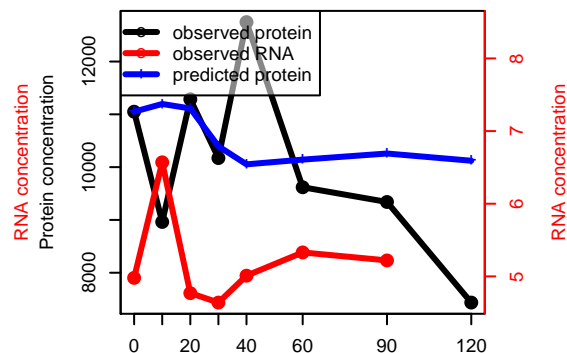

Time (min)  
ks = 92.7078902369621 kd = 0.0472711596592273

ACO1

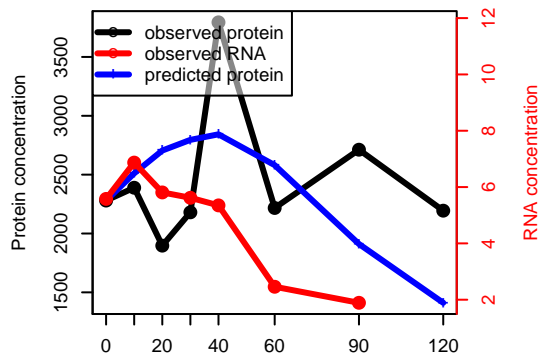

Time (min)  
ks = 12.12123080936 kd = 0.0219087236038821

ECM29

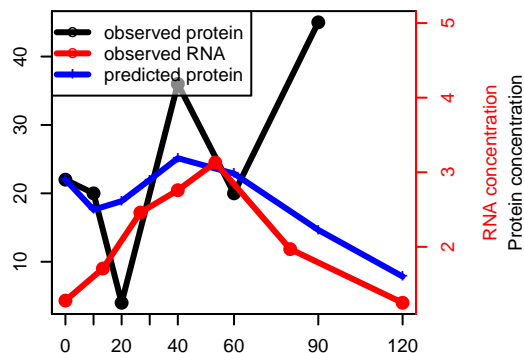

Time (min)  
ks = 0.757169149349744 kd = 0.0816453120760763

POL2

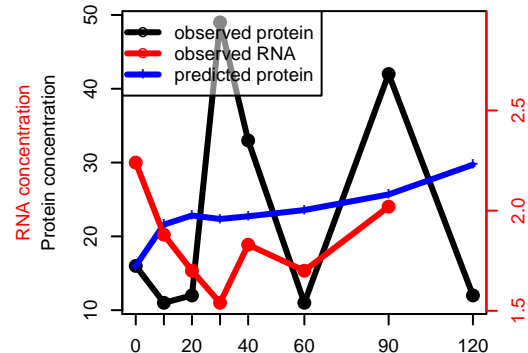

Time (min)  
ks = 0.893808967551813 kd = 0.0662405101525861

RPL17B

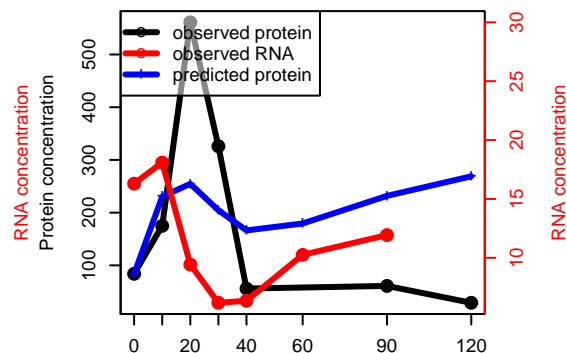

Time (min)  
ks = 1.56129410388252 kd = 0.0745431965738777

DPS1

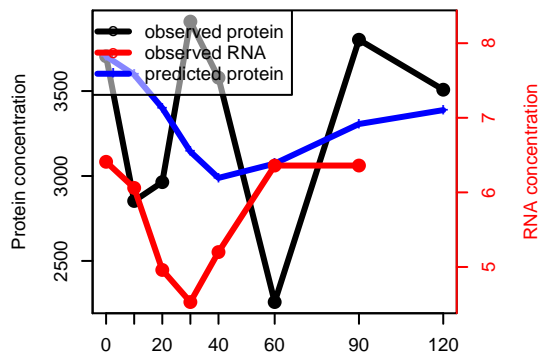

Time (min)  
ks = 18.8989291401163 kd = 0.0352324782858672

SEC53

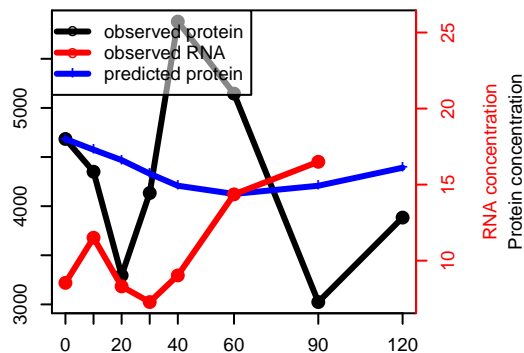

Time (min)  
ks = 1.97513110481474 kd = 0.0066540000053753

LHP1

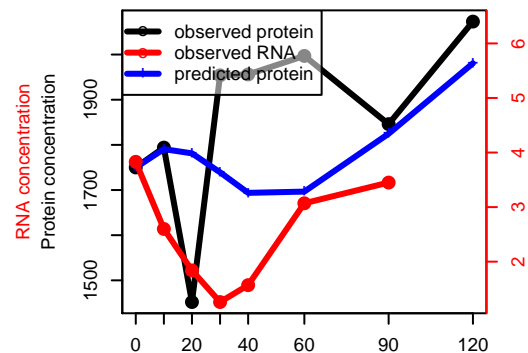

Time (min)  
ks = 4.93727986506579 kd = 0.0066540000053753

BBC1

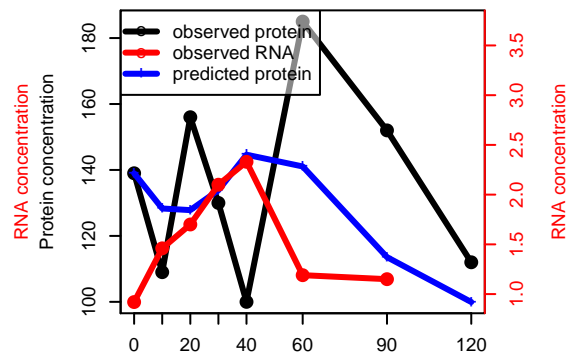

Time (min)  
ks = 2.25591084959707 kd = 0.0283306405372917

RPL31B

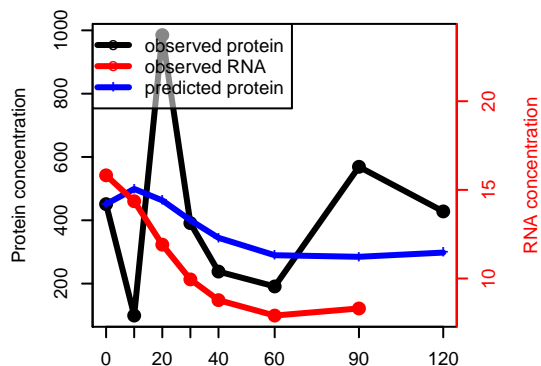

ks = 4.08342423260815 kd = 0.117022063657425

GCV2

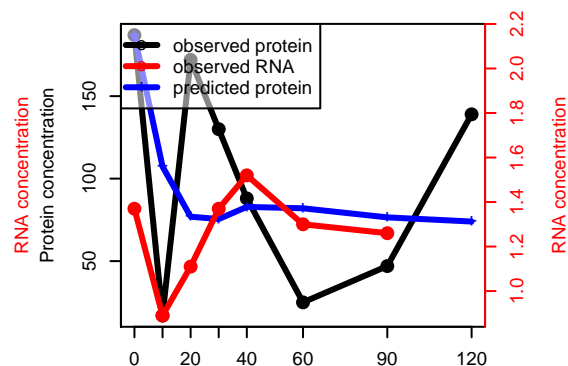

ks = 6.29492334889399 kd = 0.105599045356074

NAT1

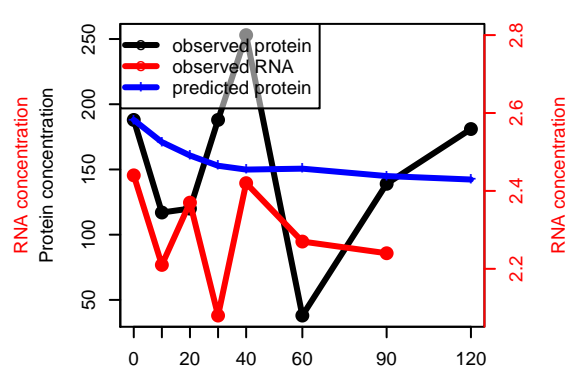

ks = 3.63016214655675 kd = 0.0565552927611693

ARO9

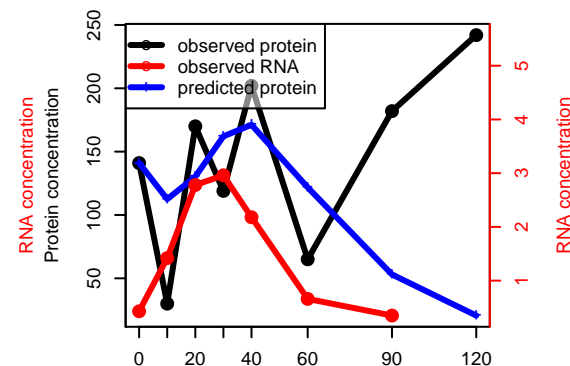

ks = 3.7374496651762 kd = 0.0514345602283521

SHB17

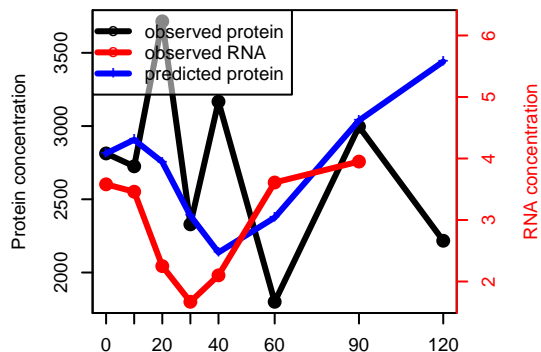

ks = 36.9440671423931 kd = 0.0421237743344737

SHM1

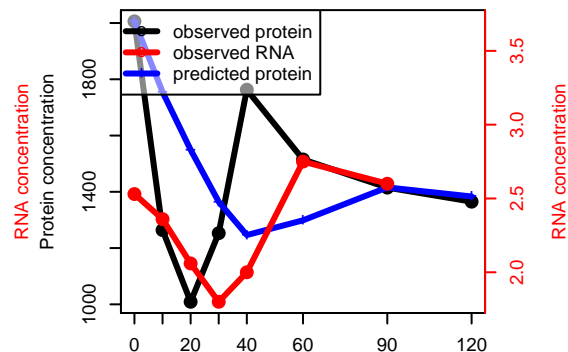

ks = 25.5615622571666 kd = 0.0467008275649025

HPT1

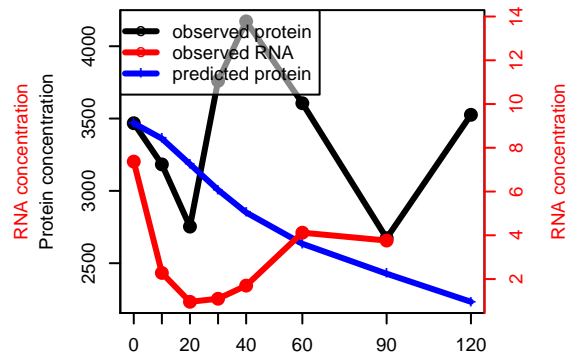

ks = 2.51921333792844 kd = 0.0066540000053753

GCS1

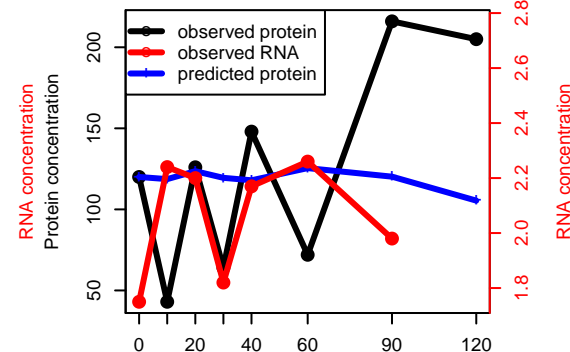

ks = 3.91392952921678 kd = 0.0674235645169335

NAS6

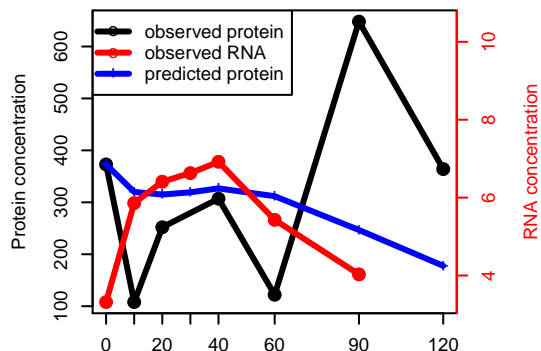

ks = 2.43761568564043 kd = 0.0486044697789688

TAN1

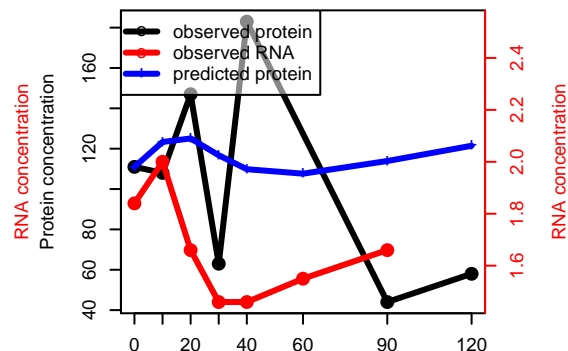

ks = 4.98016056931145 kd = 0.0710647800218136

COX6

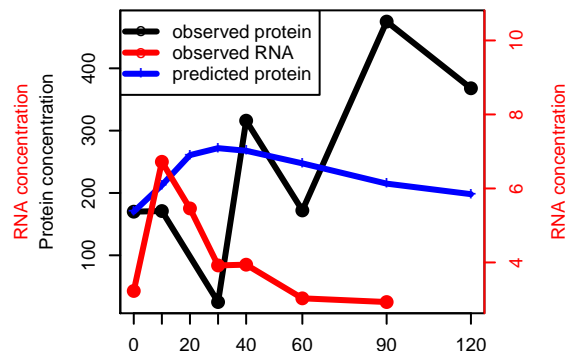

ks = 2.00001212993352 kd = 0.0305544213952542

FLC2

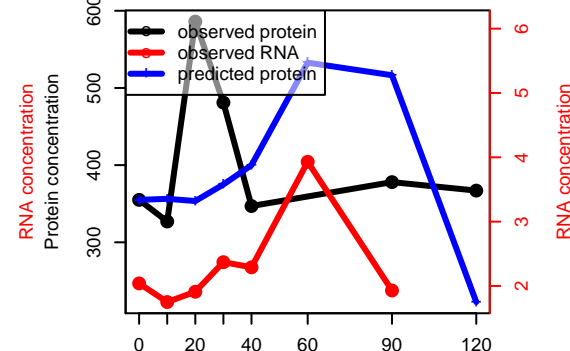

ks = 9.12633628399901 kd = 0.047998867765454

TKL1

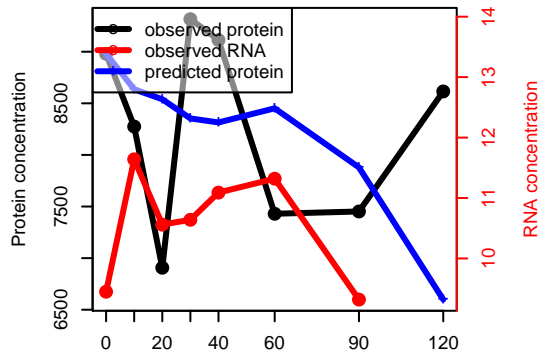

Time (min)

ks = 35.2964657623703 kd = 0.0465390932302274

GUS1

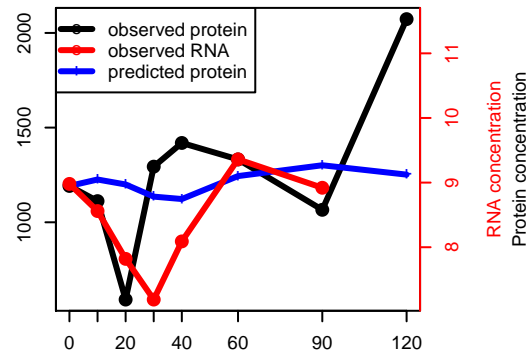

Time (min)

ks = 10.4423461296861 kd = 0.0726446210622328

KRS1

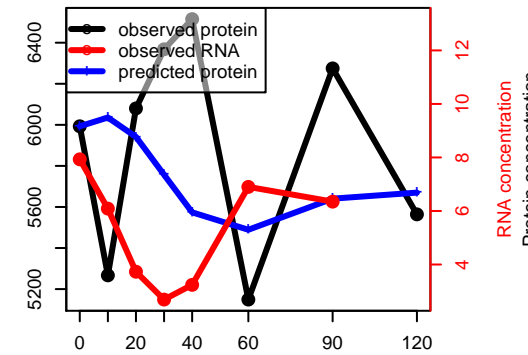

Time (min)

ks = 6.33154031239275 kd = 0.0066540000053753

PAN1

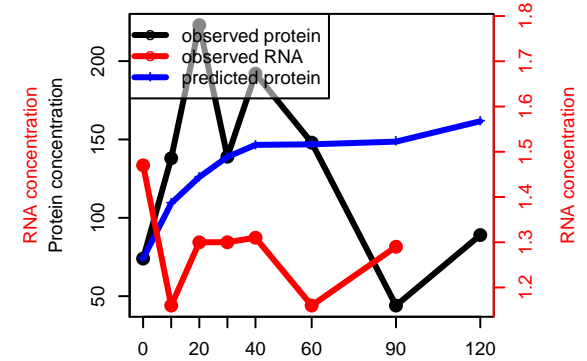

Time (min)

ks = 6.64243790448053 kd = 0.0548328836754626

GLR1

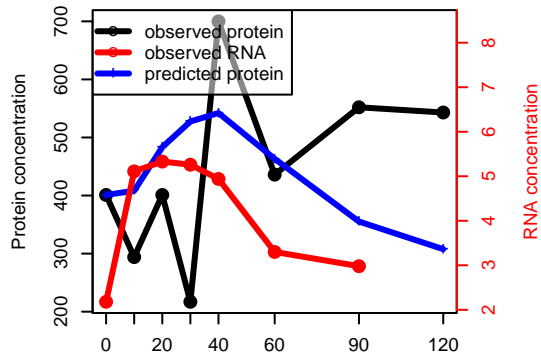

Time (min)

ks = 6.57585401450571 kd = 0.059702903010972

NAB2

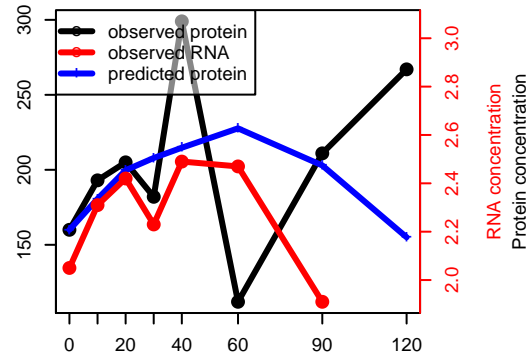

Time (min)

ks = 5.63960392395594 kd = 0.0601031185577105

TPI1

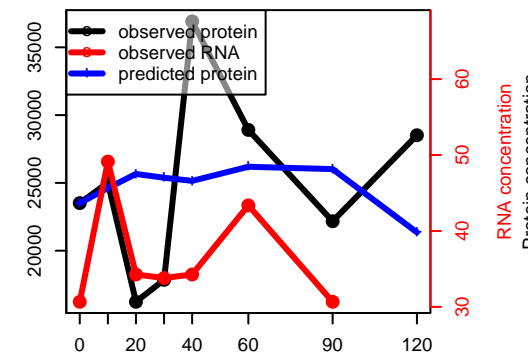

Time (min)

ks = 16.730021150846 kd = 0.0233470757123225

FBA1

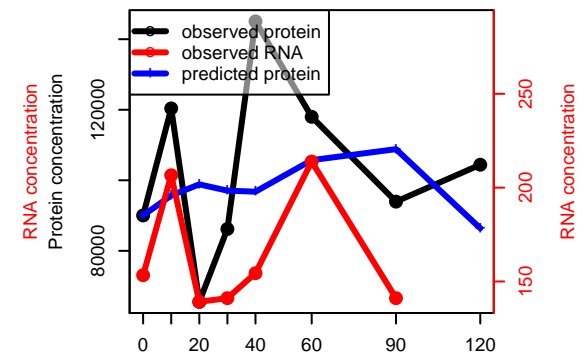

Time (min)

ks = 15.361267332342 kd = 0.0237958238153129

HOM6

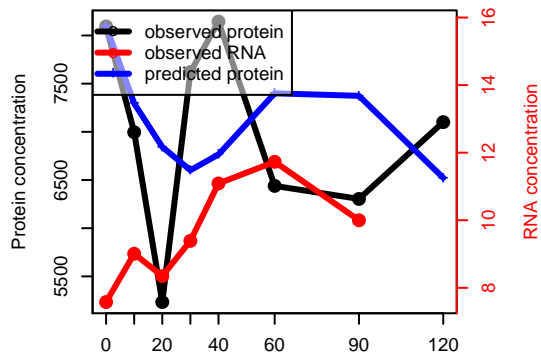

Time (min)

ks = 28.4489816718924 kd = 0.0413255679788948

IDH1

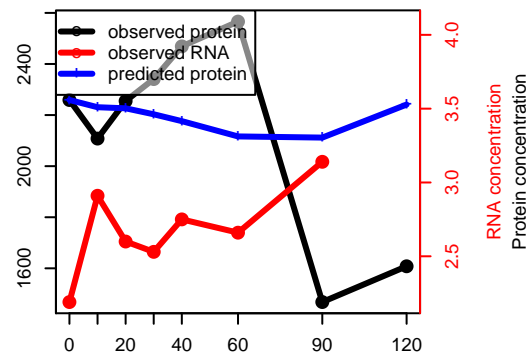

Time (min)

ks = 11.1356612356345 kd = 0.0139192913626026

BAT1

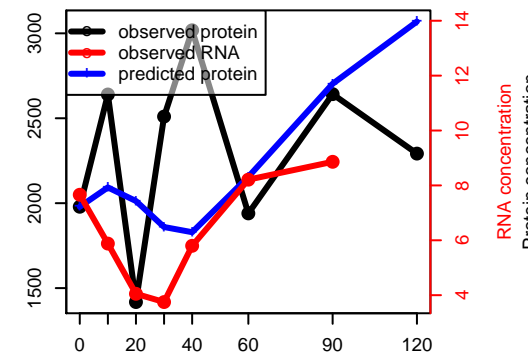

Time (min)

ks = 10.4585716249528 kd = 0.028973931637191

ILV2

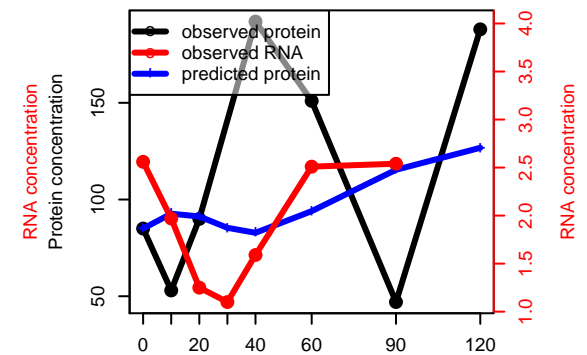

Time (min)

ks = 1.26851177196474 kd = 0.0235440527506995

YAR1

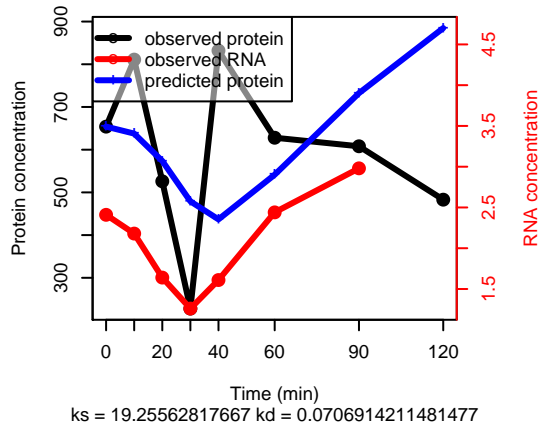

SAH1

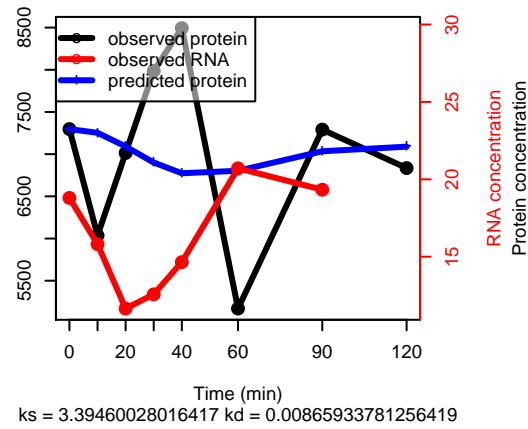

TMA22

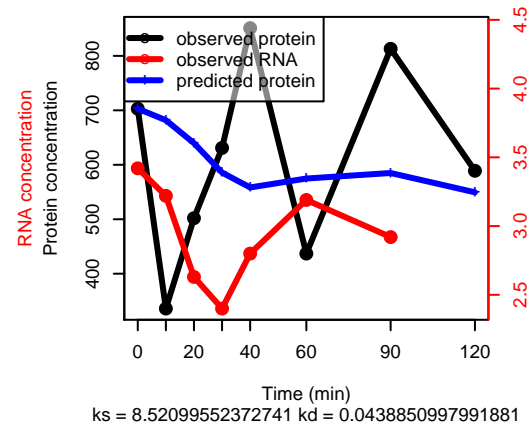

DED81

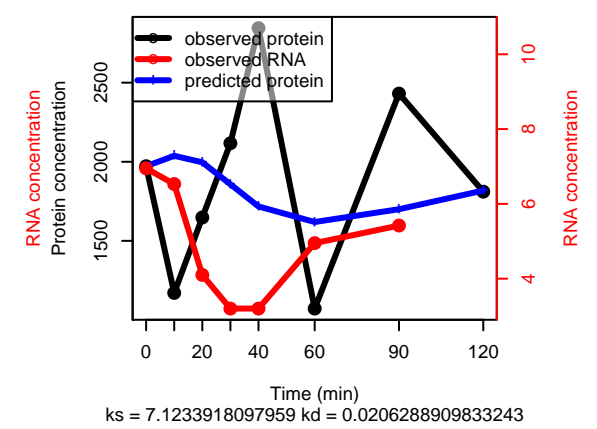

GRX5

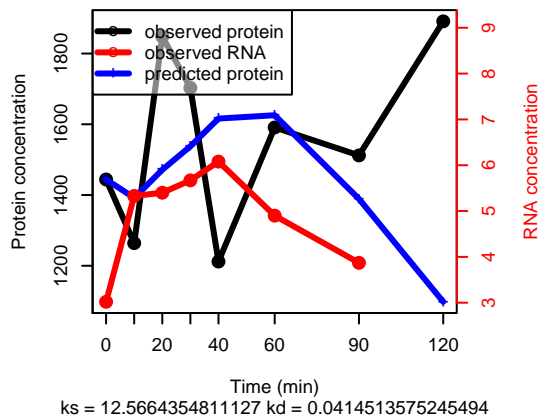

SEC14

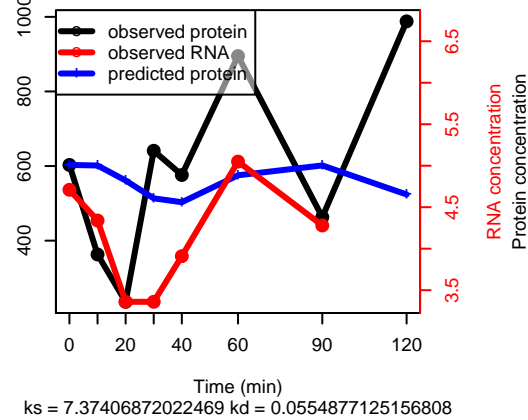

HAM1

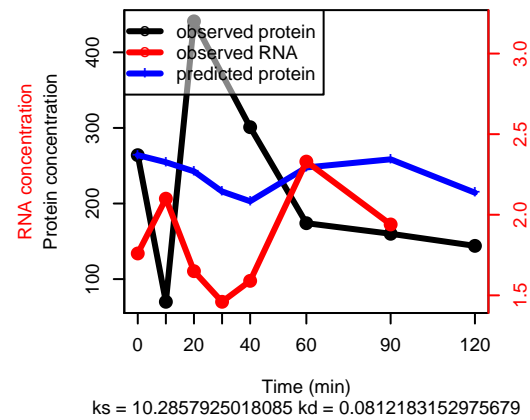

SIR2

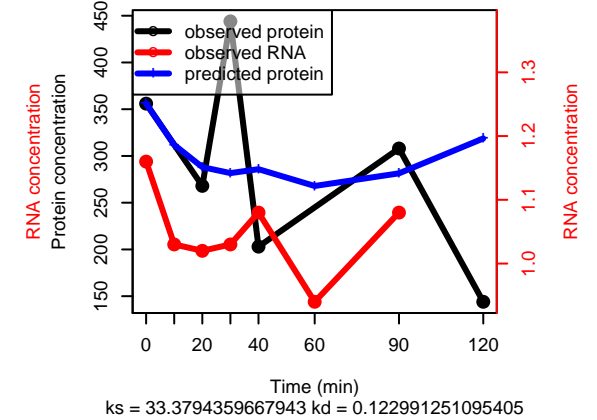

YMR226C

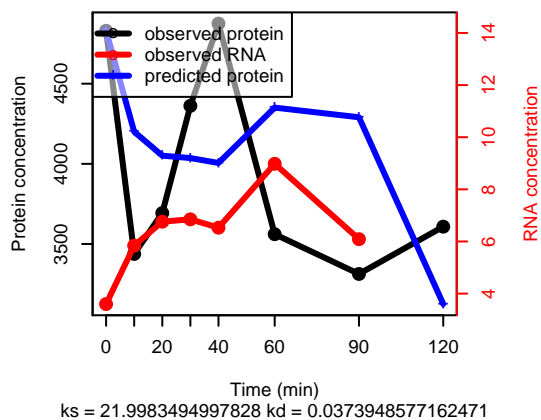

ATP15

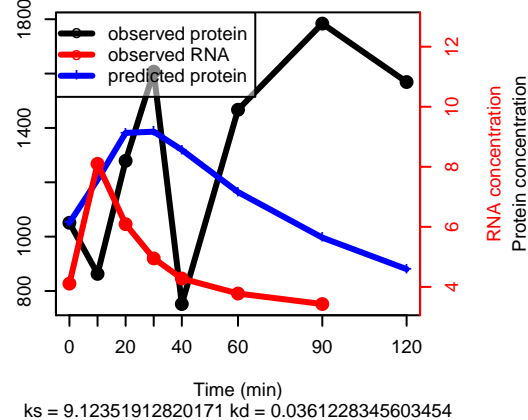

KCS1

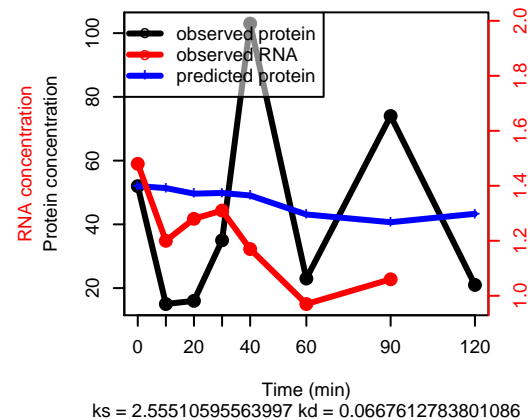

TEF2

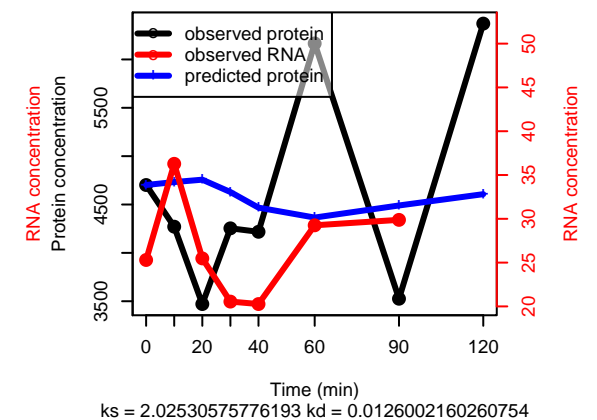



VMA4

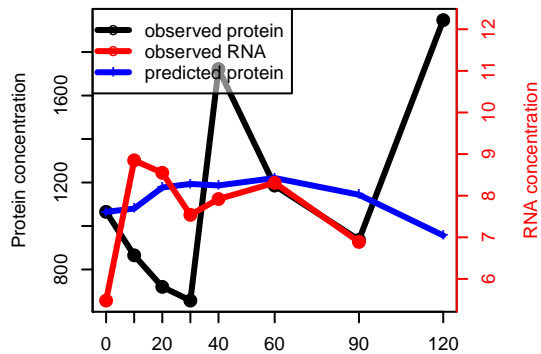

Time (min)  
ks = 8.38293905891739 kd = 0.0557068967433924

PUS7

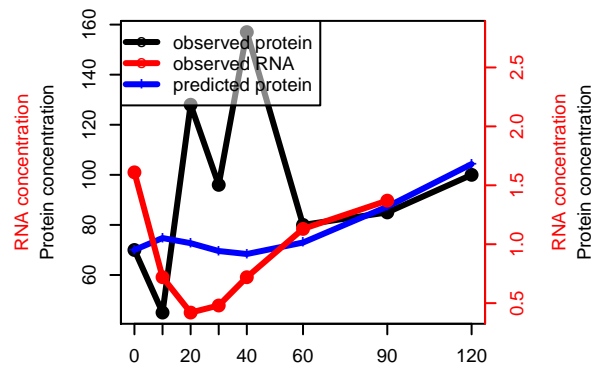

Time (min)  
ks = 1.12749261748618 kd = 0.0114543753697282

SOL3

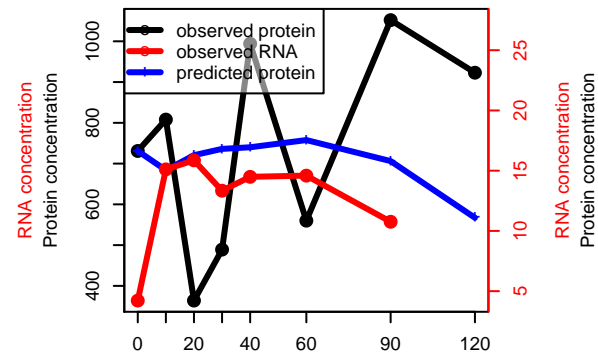

Time (min)  
ks = 1.4909979168535 kd = 0.0276222253231502

PWP1

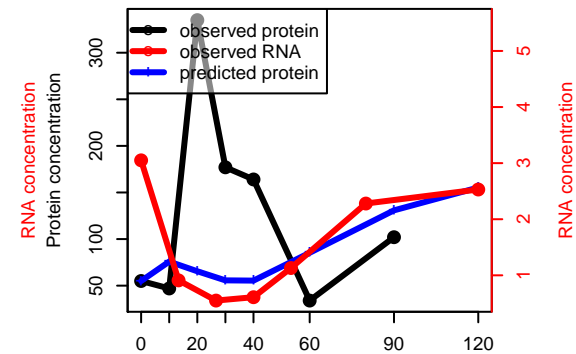

Time (min)  
ks = 2.47960556665352 kd = 0.0401536403701195

RPS25A

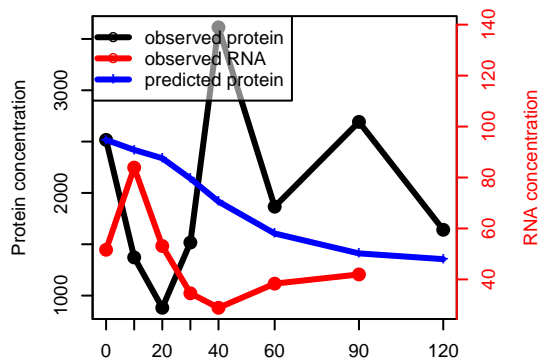

Time (min)  
ks = 0.595903660805996 kd = 0.0204484356915589

HEM2

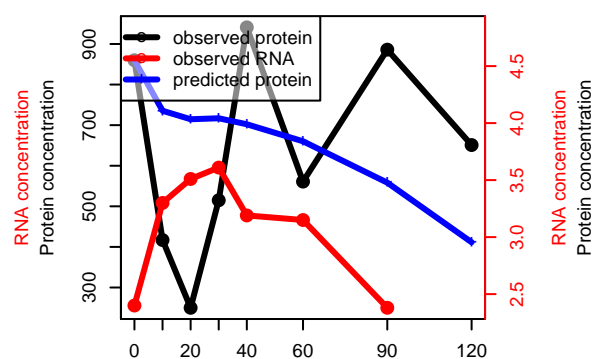

Time (min)  
ks = 12.2324546507508 kd = 0.0604159426485071

RPL4B

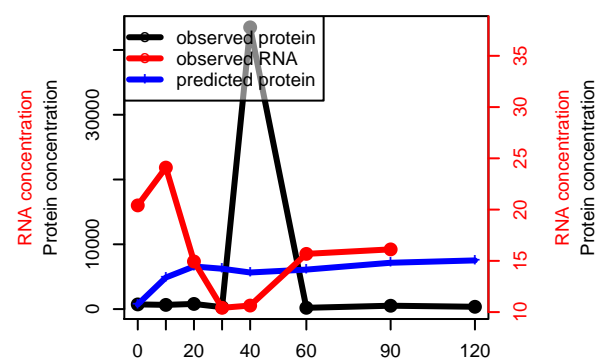

Time (min)  
ks = 26.0371903318045 kd = 0.056210447781412

SHM2

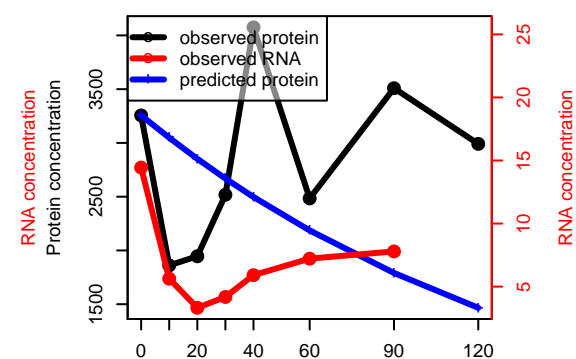

Time (min)  
ks = 0 kd = 0.0066540000053753

STI1

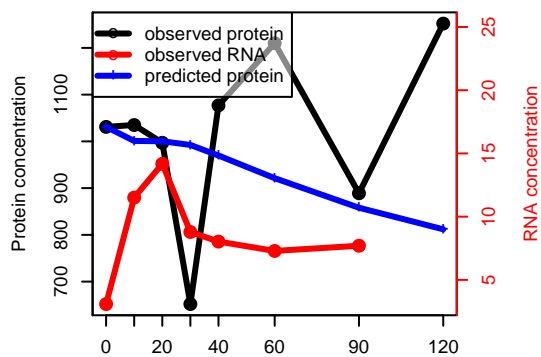

Time (min)  
ks = 0.510464135276416 kd = 0.0066540000053753

CCP1

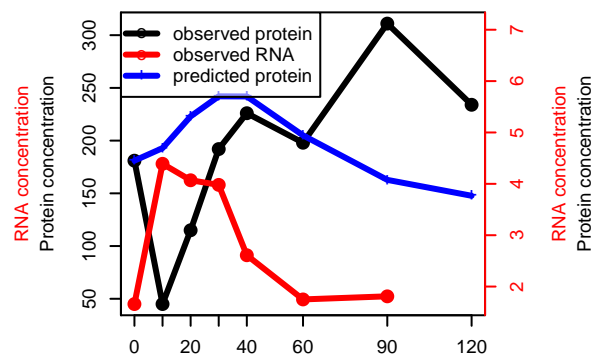

Time (min)  
ks = 2.15330094012795 kd = 0.0291721122367077

ANB1

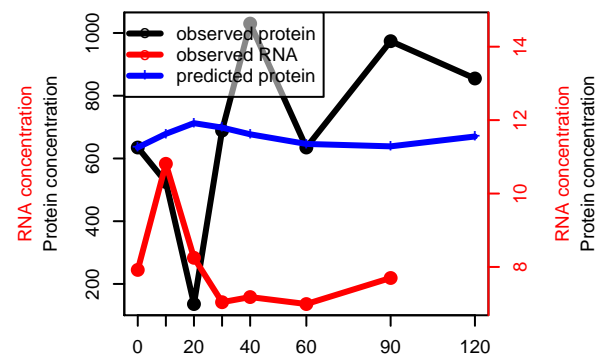

Time (min)  
ks = 2.41805120116963 kd = 0.0280340689284751

RPS30A

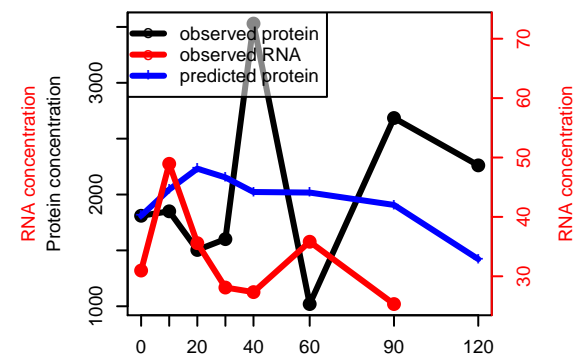

Time (min)  
ks = 2.40164331240809 kd = 0.0381344705808568

GIM5

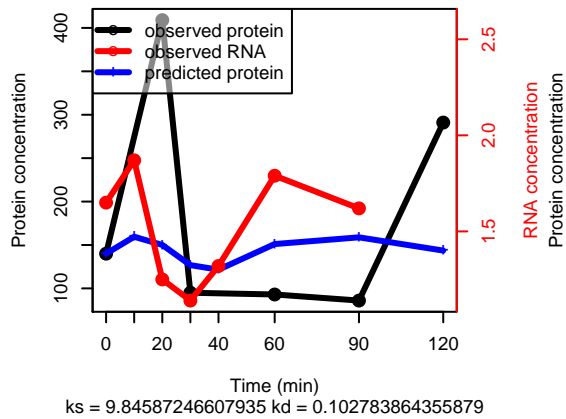

EFB1

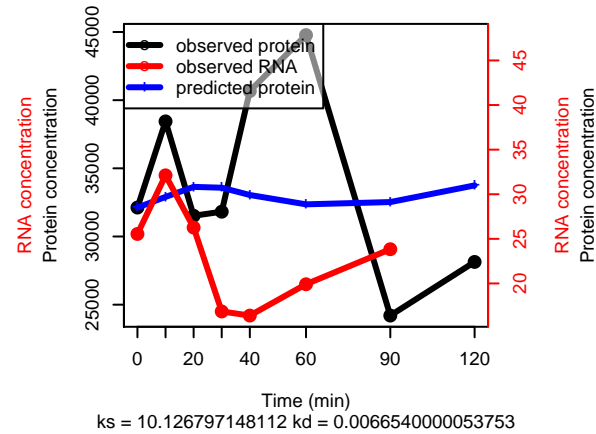

LIA1

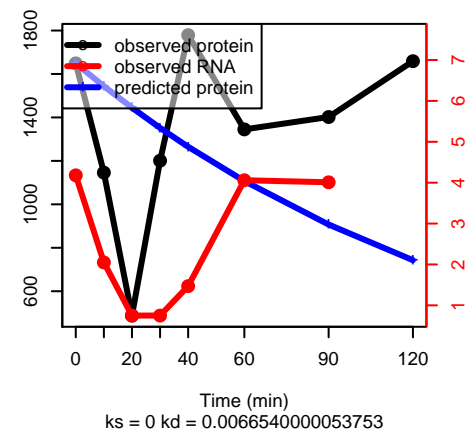

RPB10

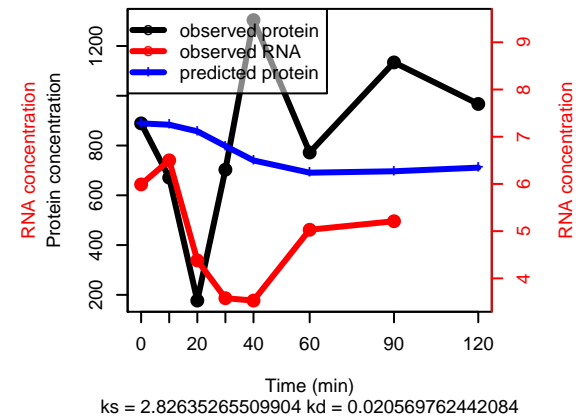

YDL086W

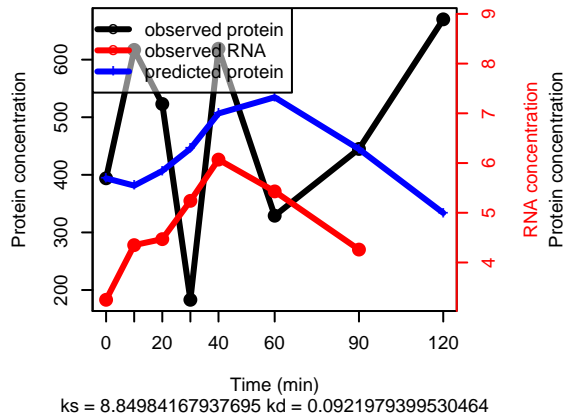

TRM112

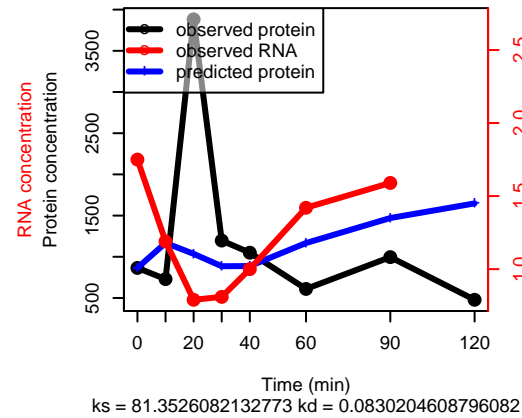

ADE1

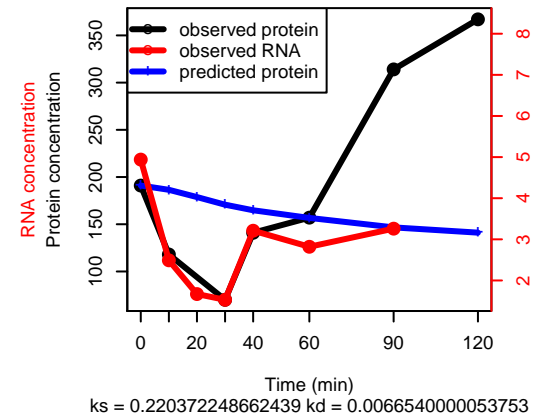

ARO4

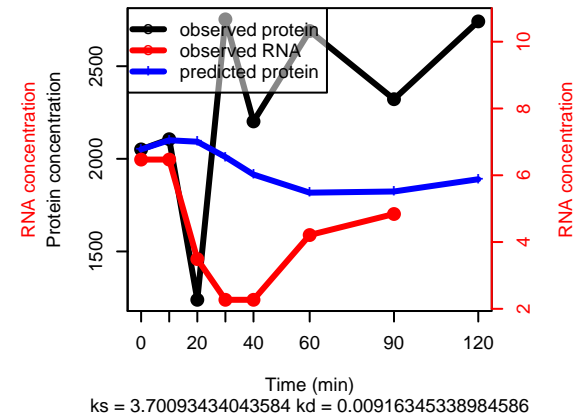

ATX1

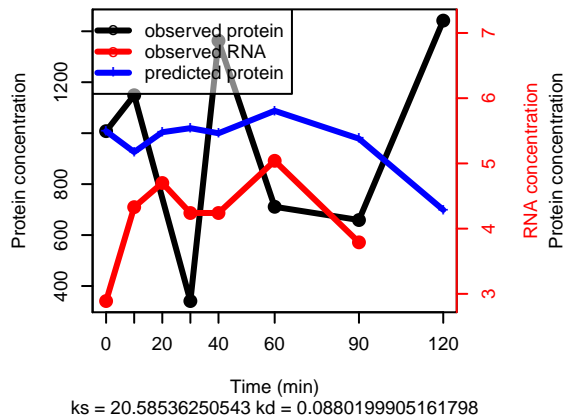

SMC1

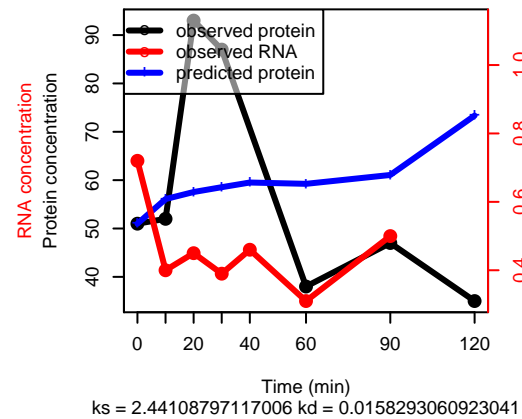

SEC16

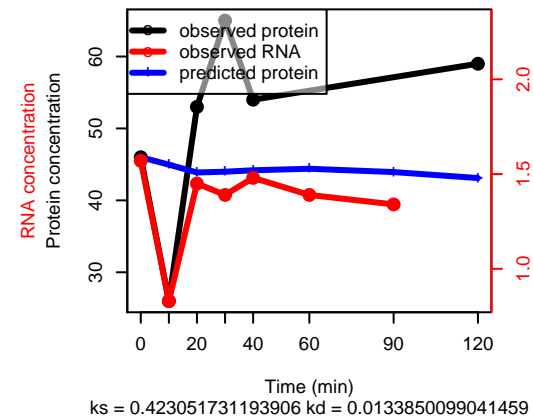

ALT2

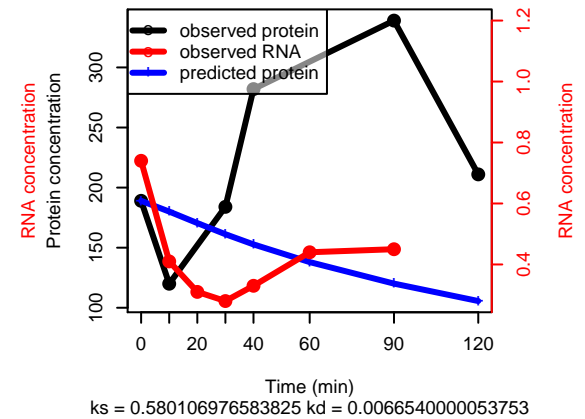

ADE17

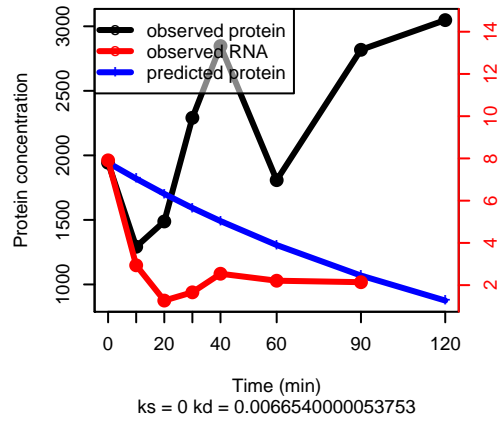

RPS14A

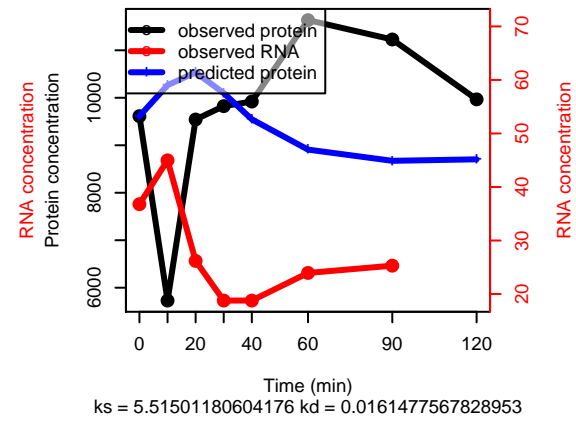

Supplement: c4mb00358f2.zip [file c4mb00358f2.zip]
