# Supplementary material for: One third of dynamic protein expression profiles can be predicted by a simple rate equation
Source: Royal Society of Chemistry journal article supplement (doi:10.1039/c4mb00358f), 2014-08-01

DRE2

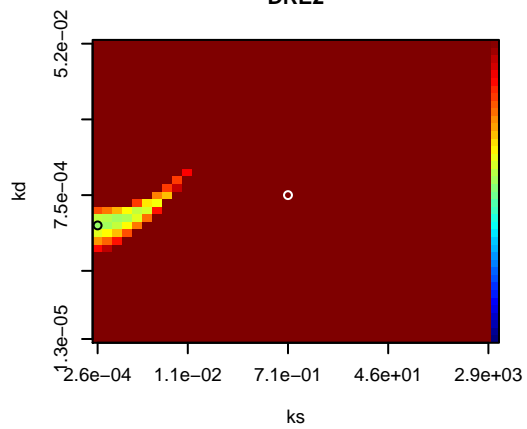

ADH3

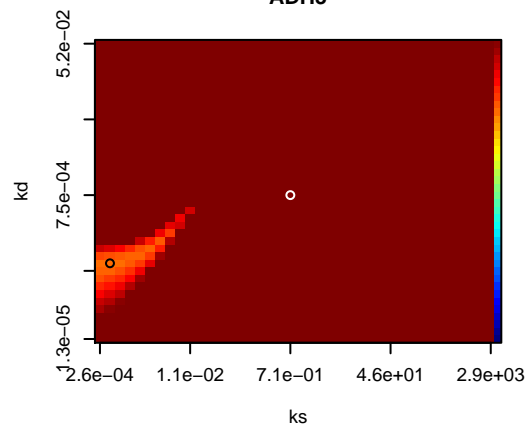

TIF5

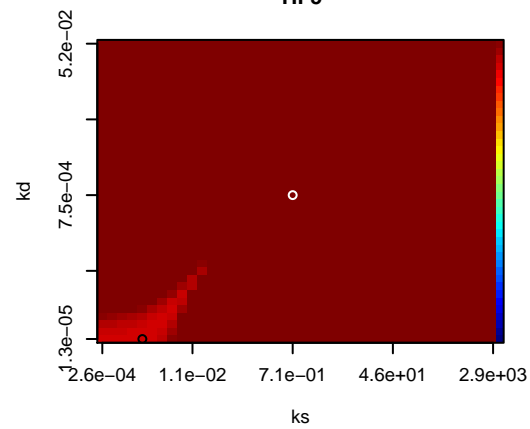

RPL27A

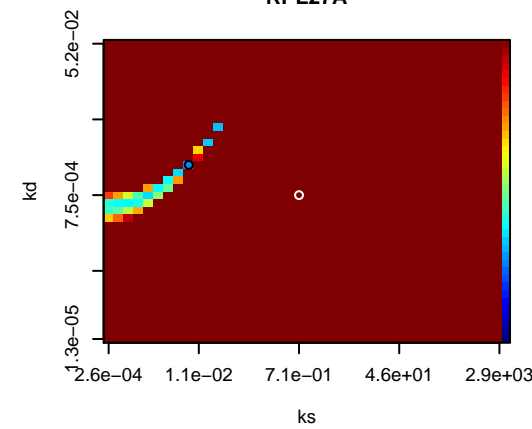

RPE1

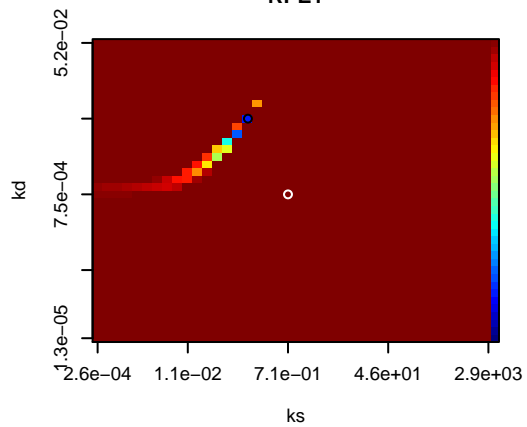

KRI1

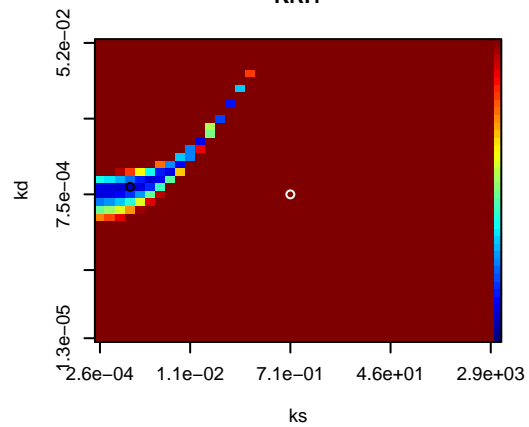

DYS1

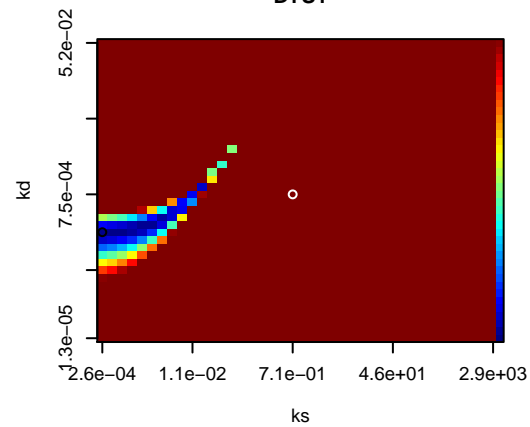

RPL7B

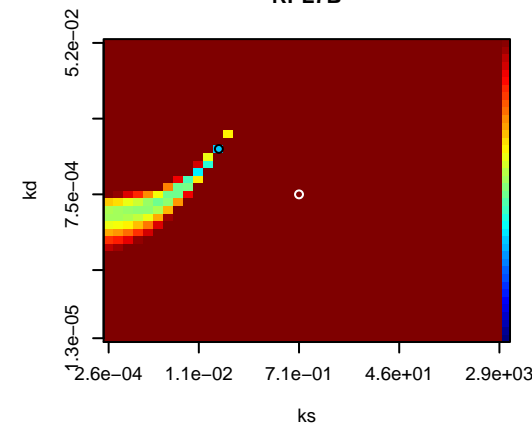

RPL43A

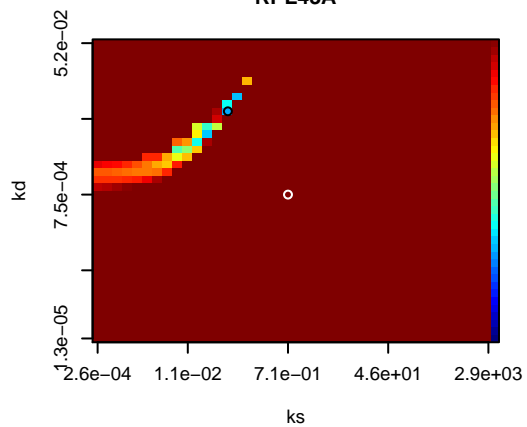

AML1

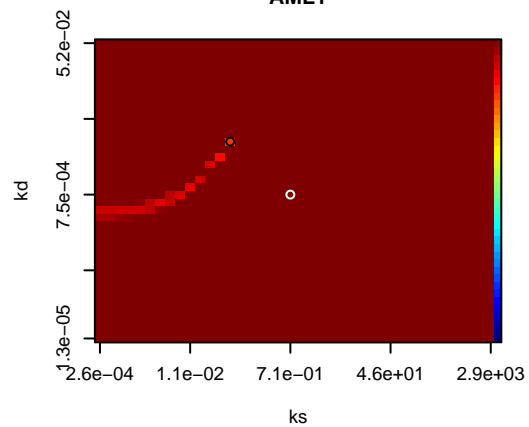

RPS29B

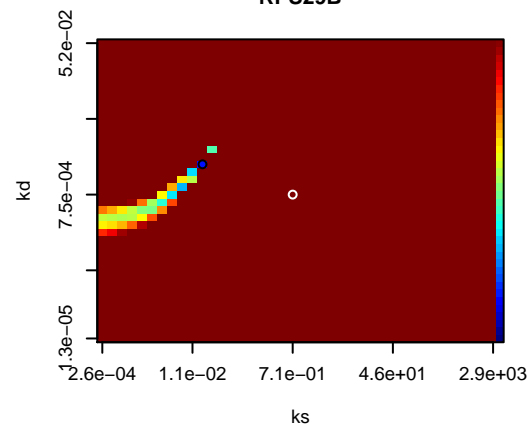

SMY2

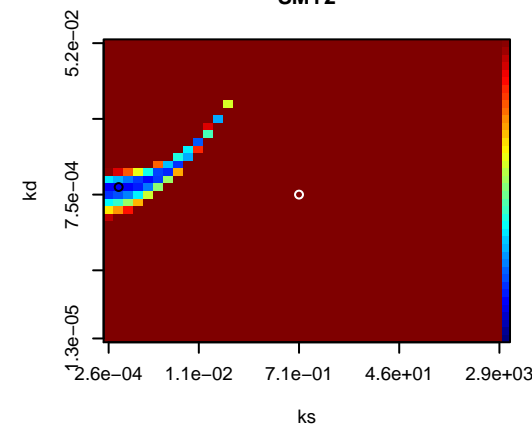

RPS30B

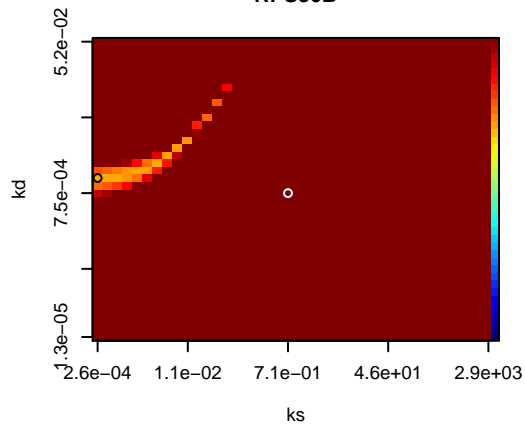

CPR7

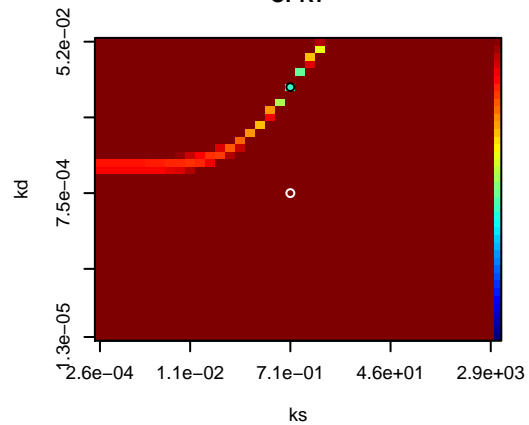

TMA16

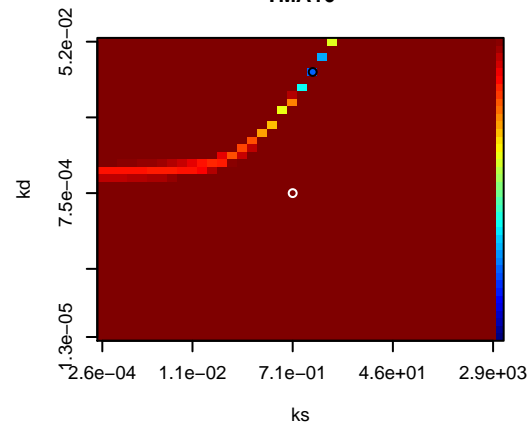

GIM5

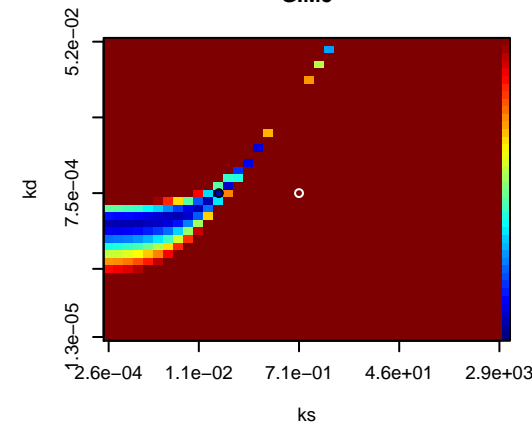

GET3

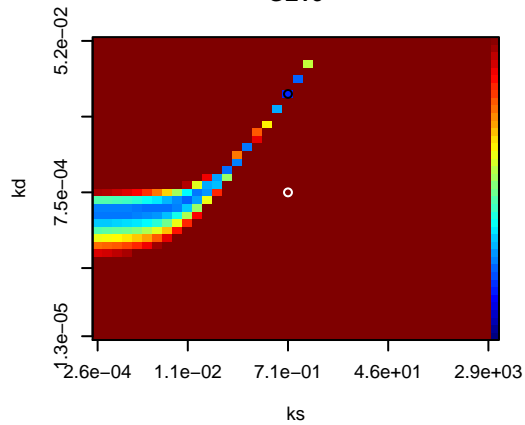

PBP1

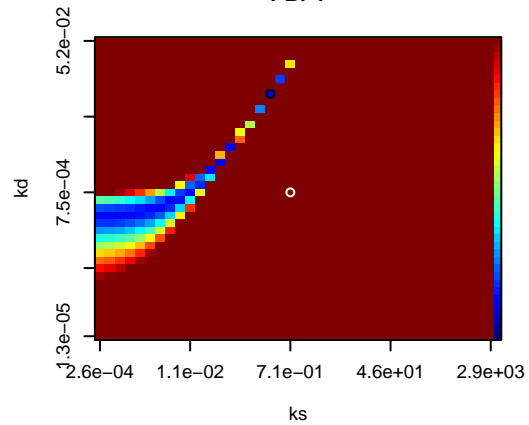

NHP6B

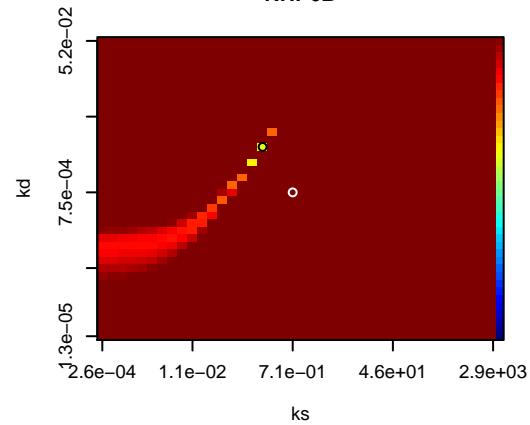

PRS4

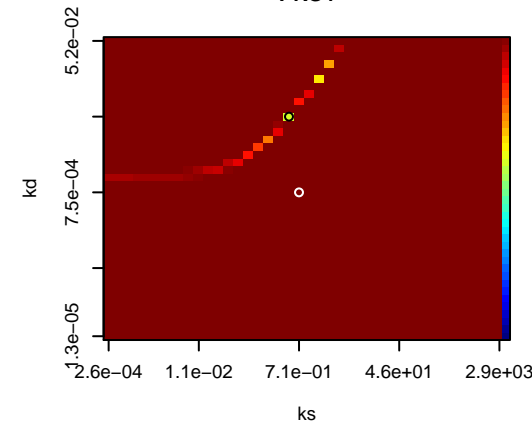

SHE3

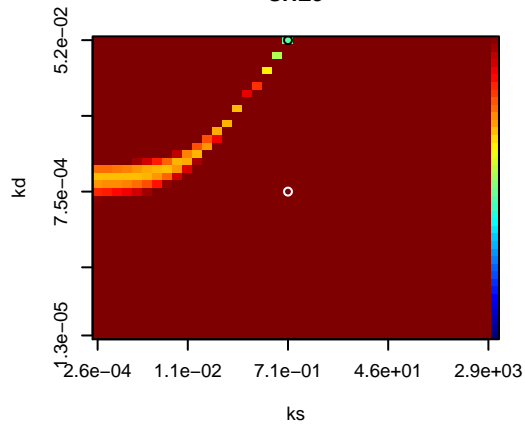

EGD1

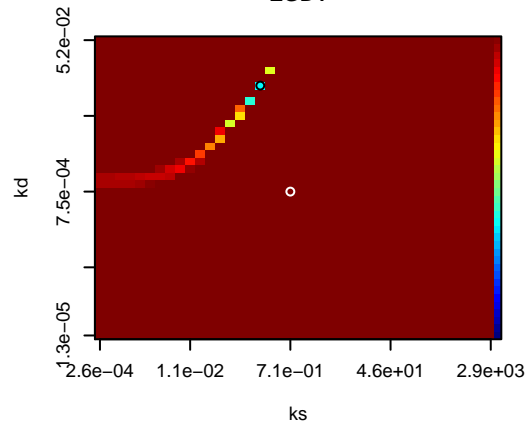

RPS14B

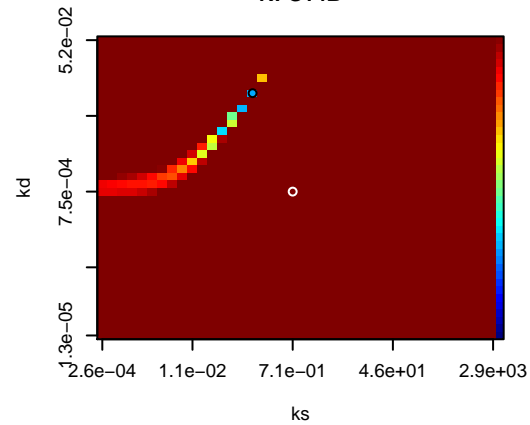

YLR419W

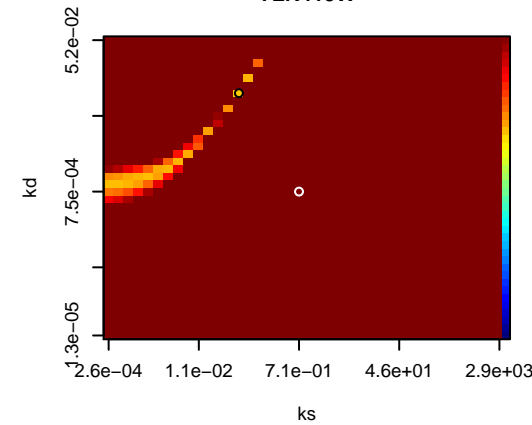

TIF34

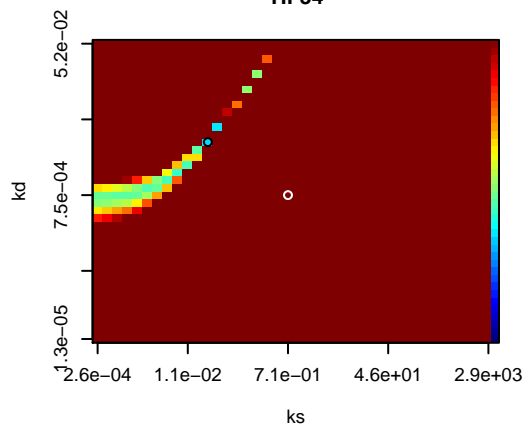

YOR021C

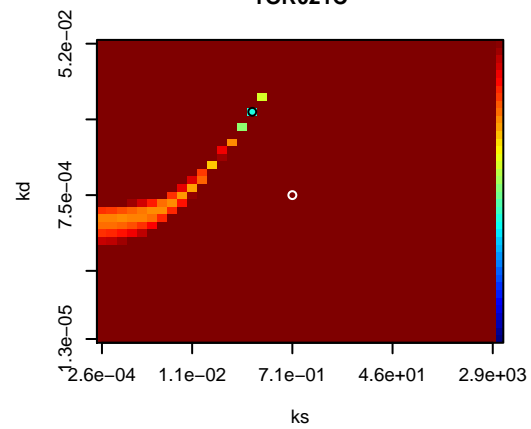

STE20

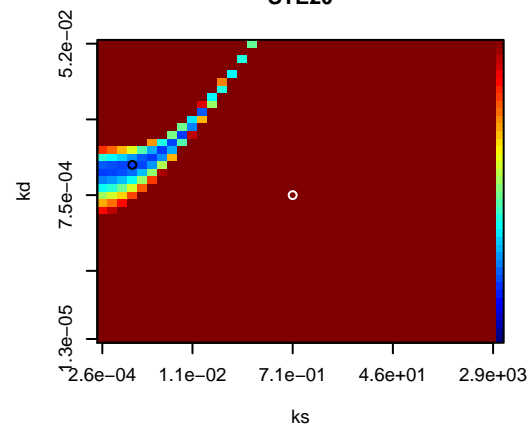

MSC7

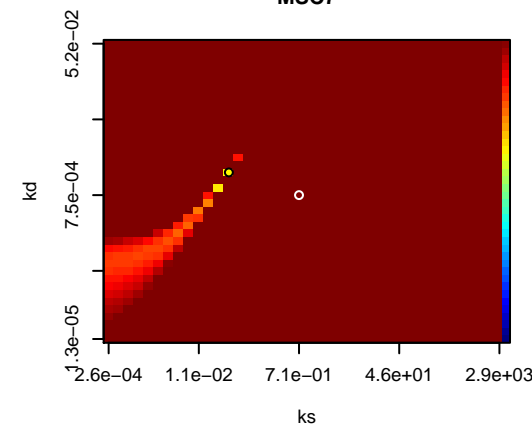

ARC18

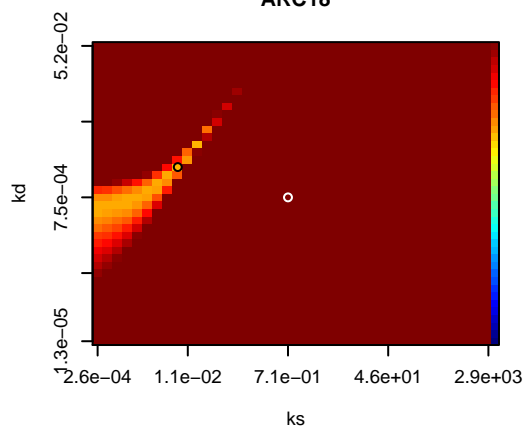

YKE2

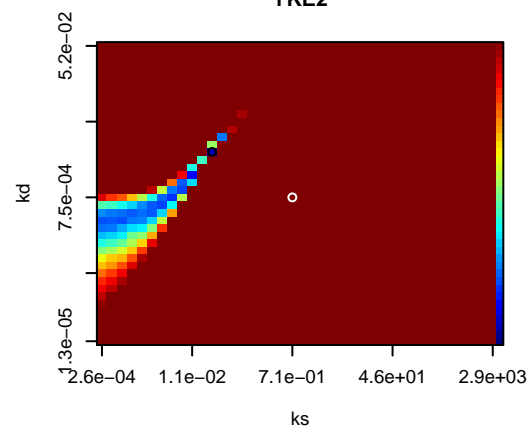

UBP1

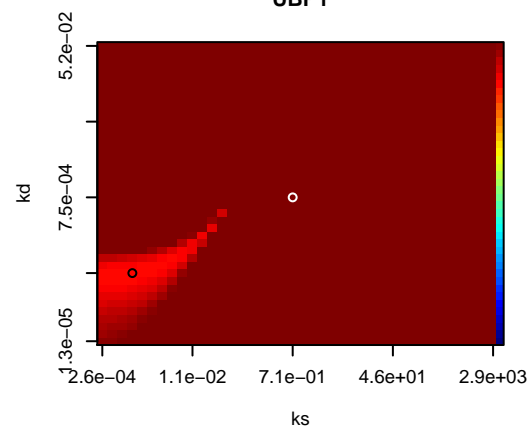

ADE1

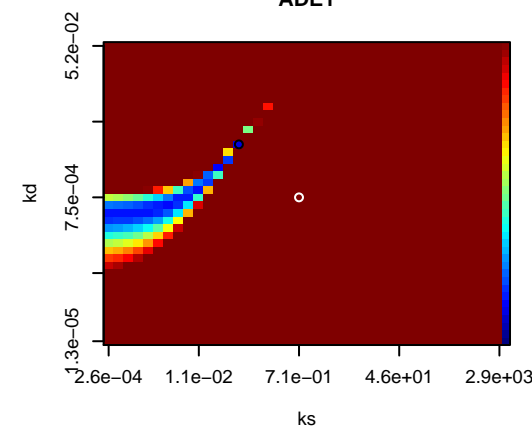

RPL36A

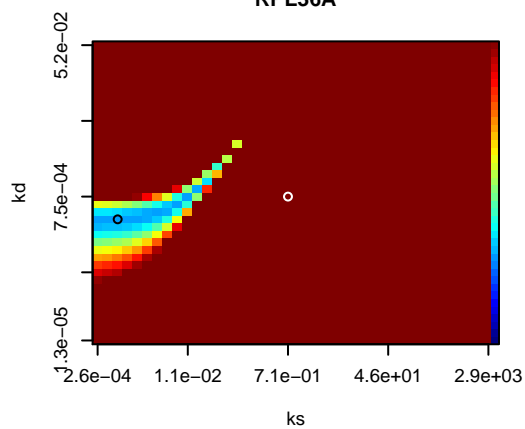

CDC39

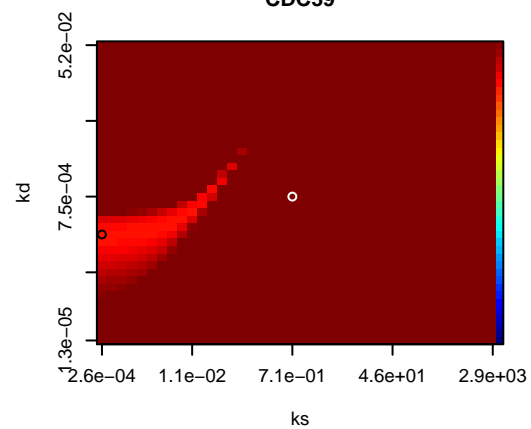

SIN3

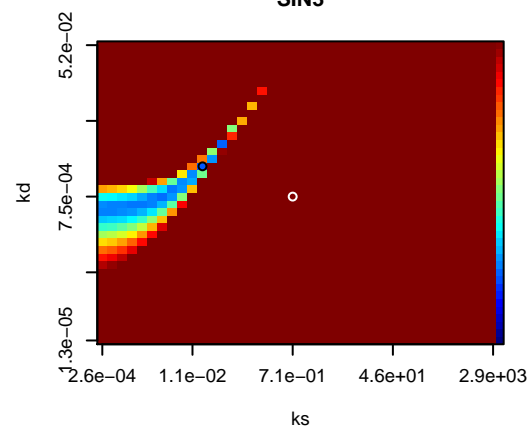

YPL199C

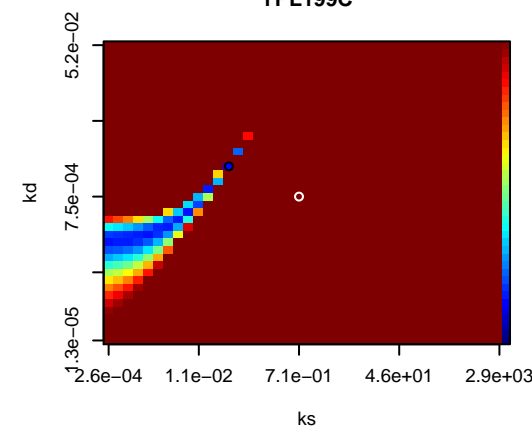

PUF4

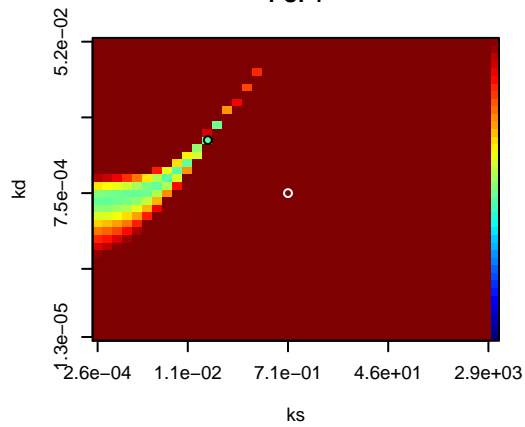

RET1

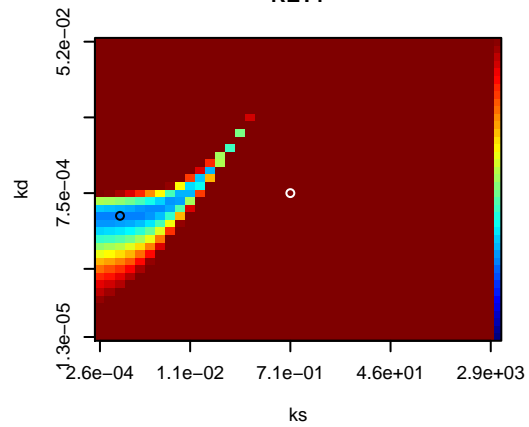

TMA46

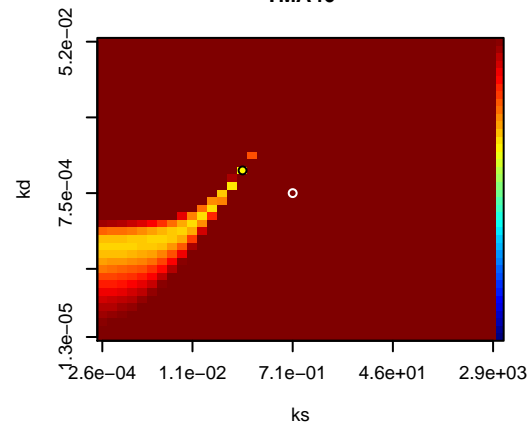

SGT2

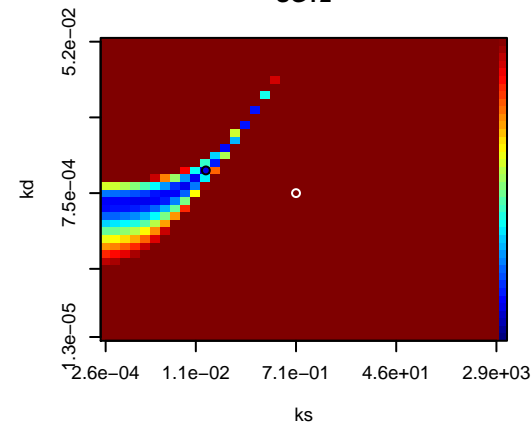

AKR1

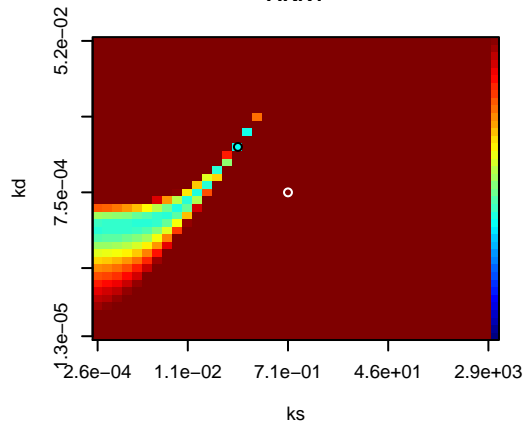

CNS1

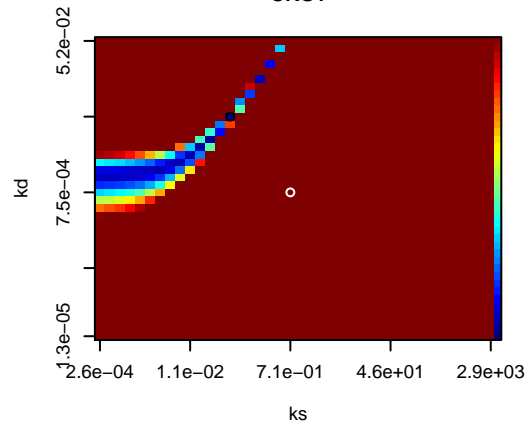

NSP1

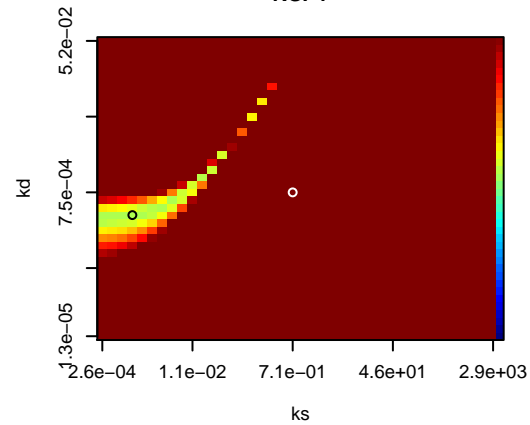

UTP14

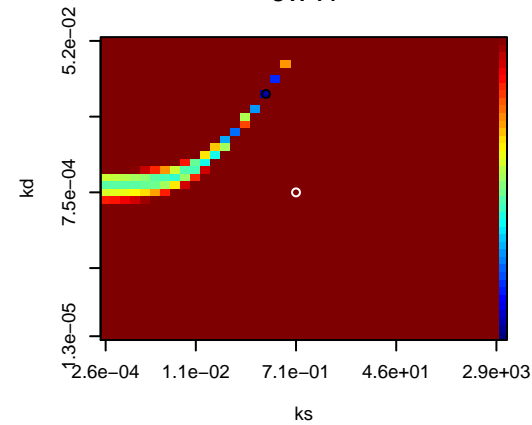

RPS7B

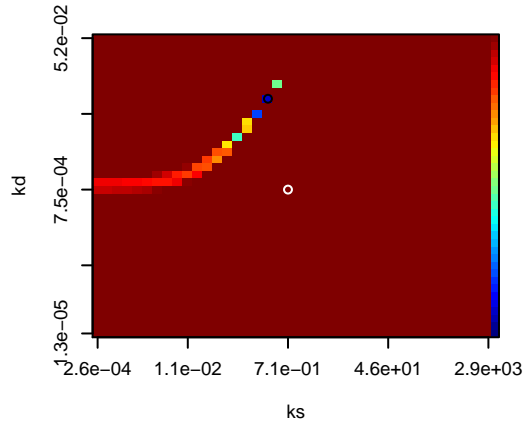

ADO1

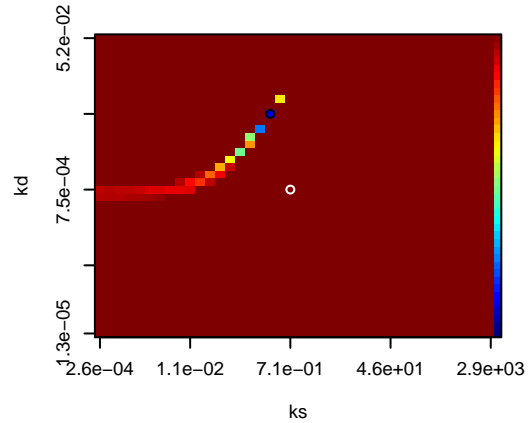

MAK5

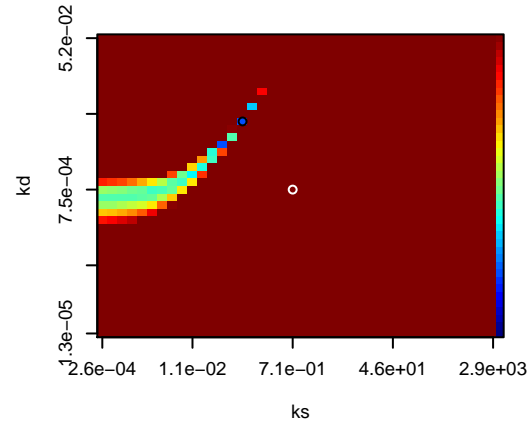

RPL6B

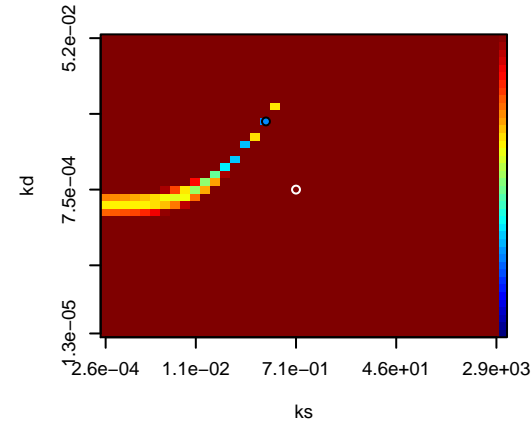

RPA43

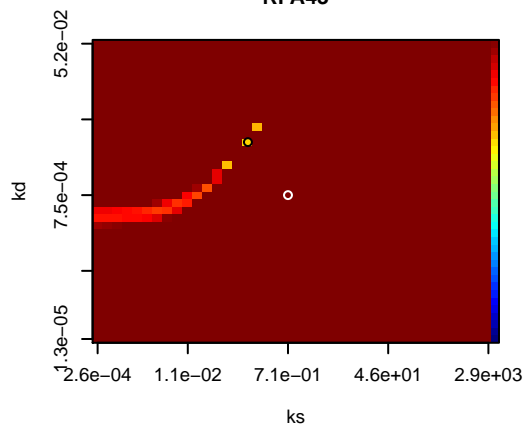

RPL8B

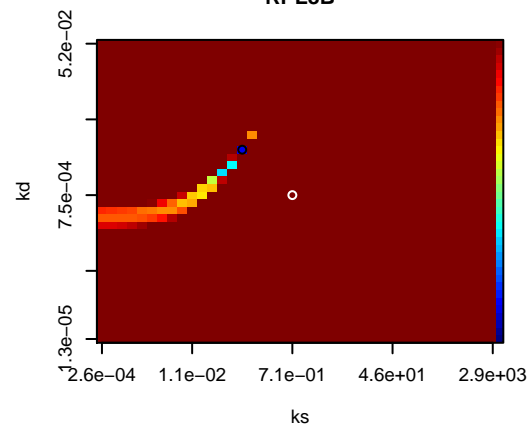

NOP56

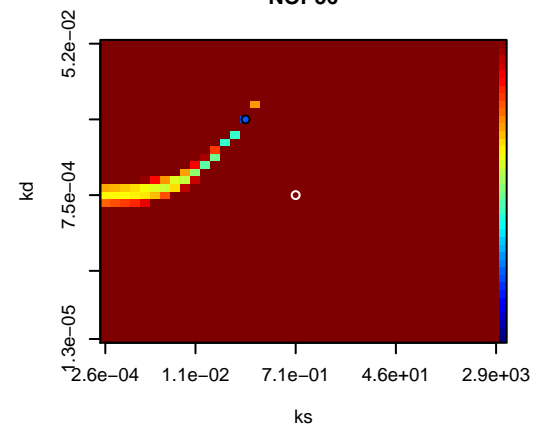

FCY1

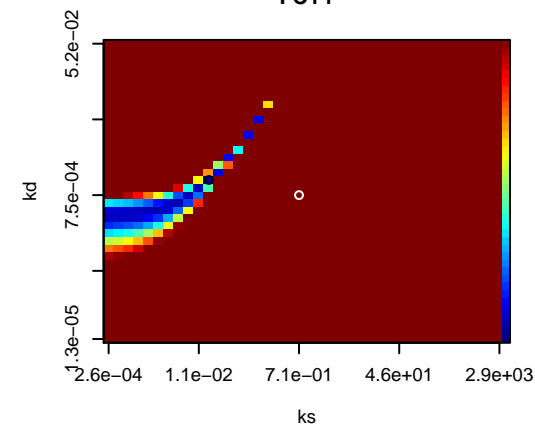

BCP1

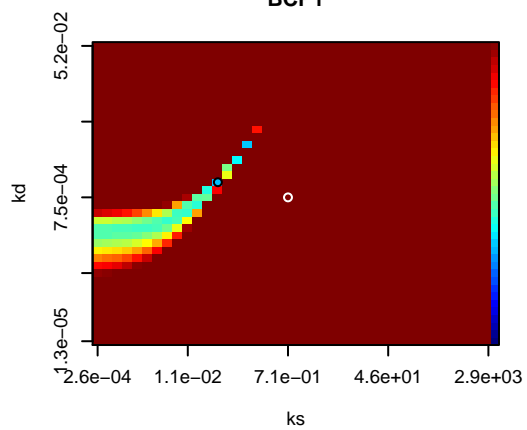

TMA20

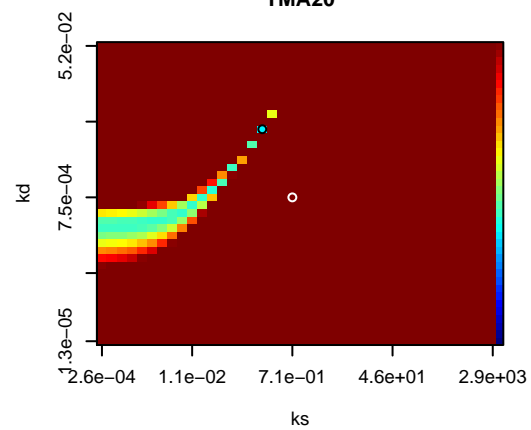

REE1

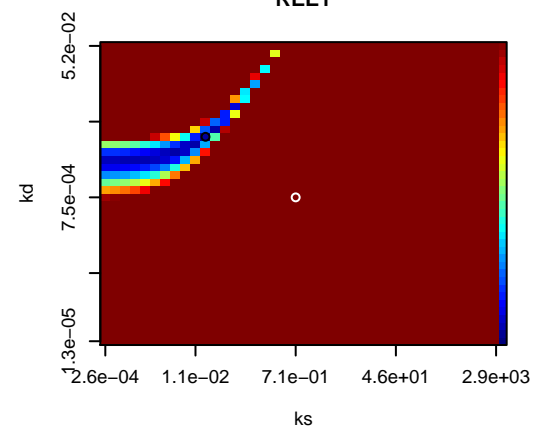

ELP4

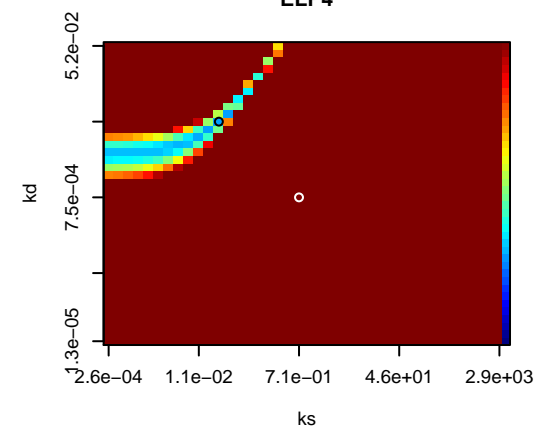

RPL17B

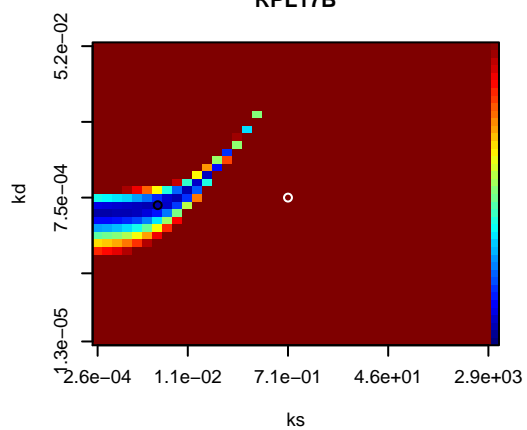

FAS2

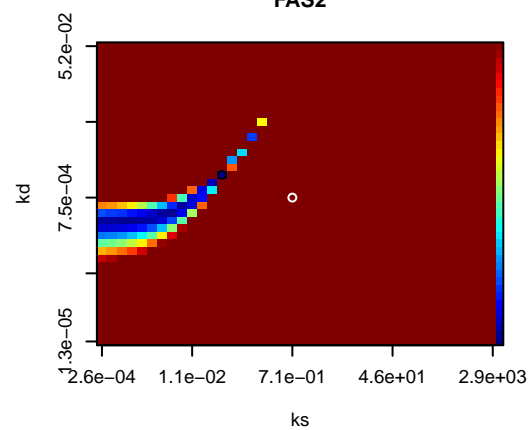

GET1

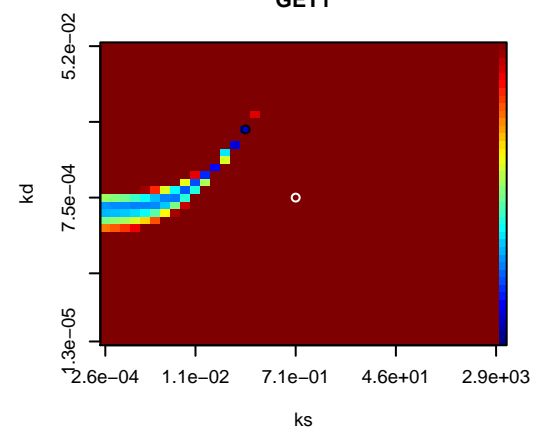

NUP2

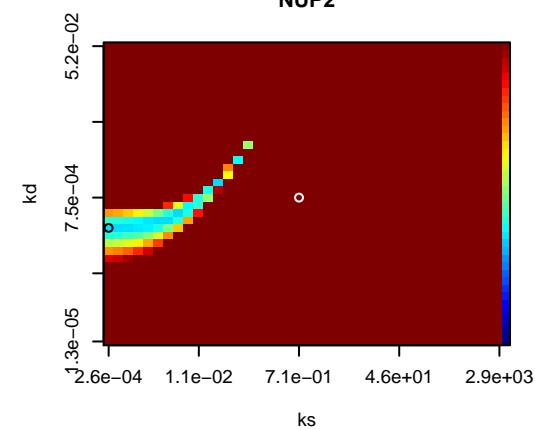

NOP53

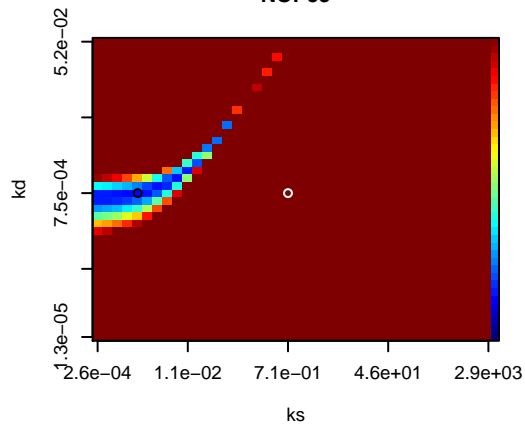

MRI1

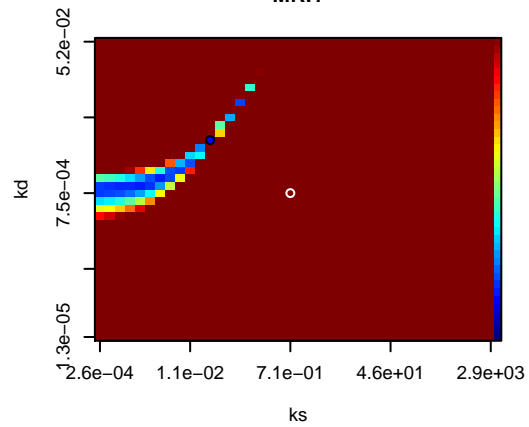

NUP1

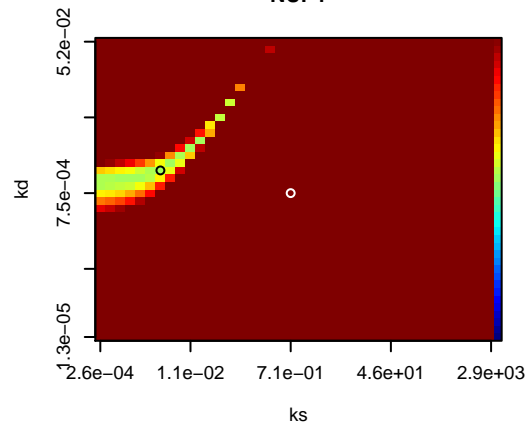

TSR1

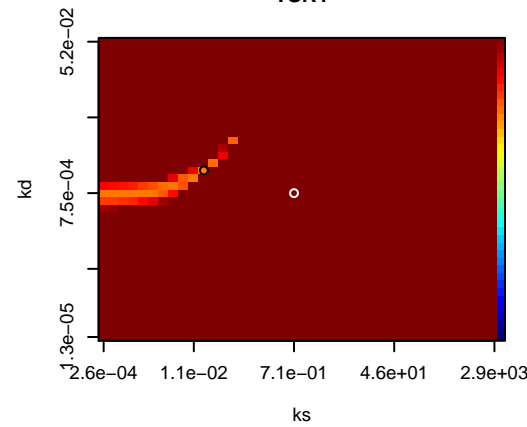

GCD1

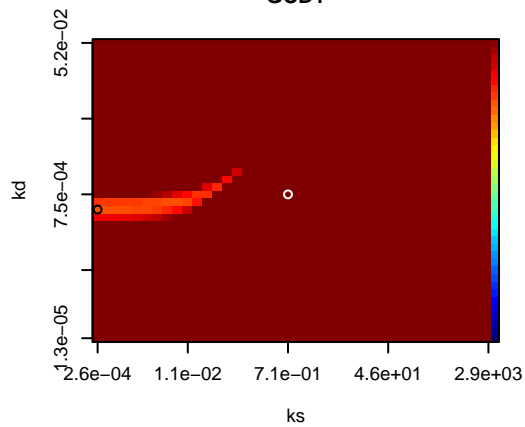

TFG1

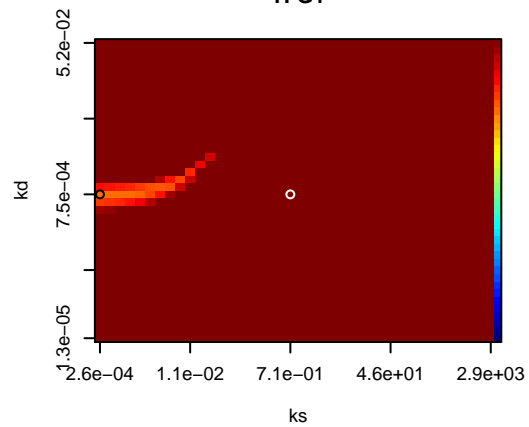

PPX1

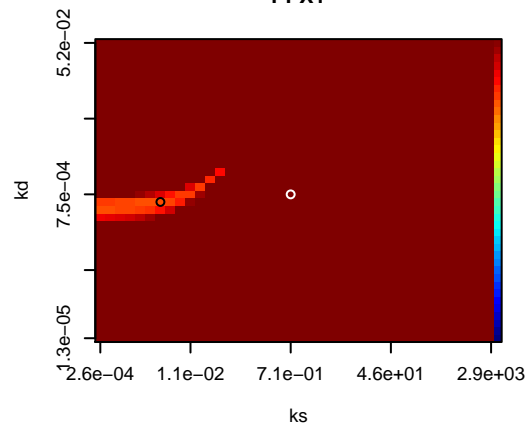

PHO12

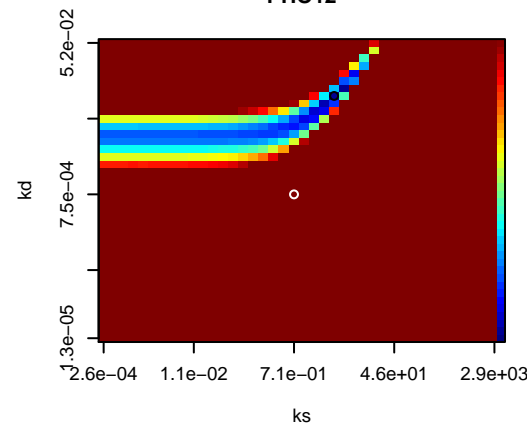

PHO5

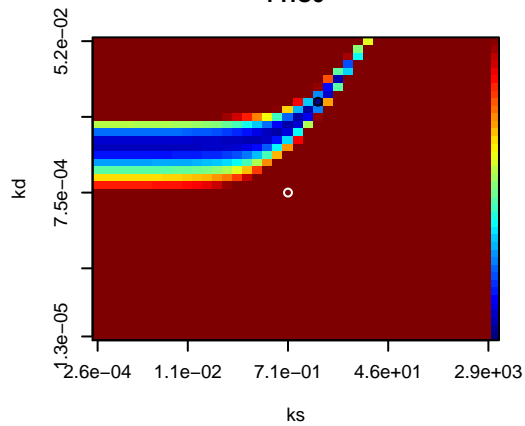

HTB2

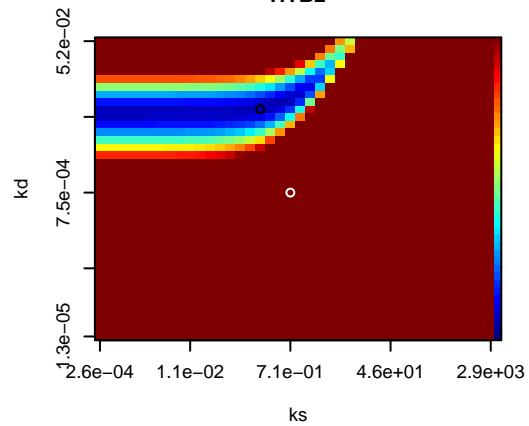

RPS26B

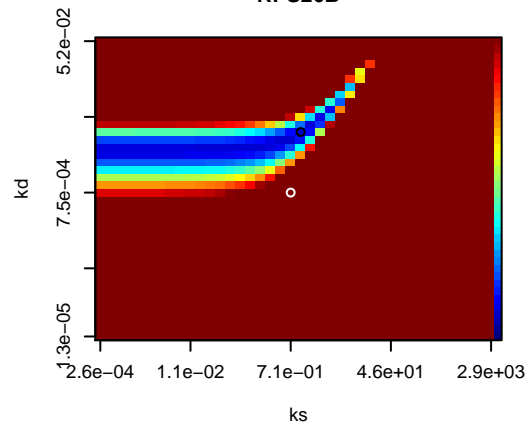

CHA1

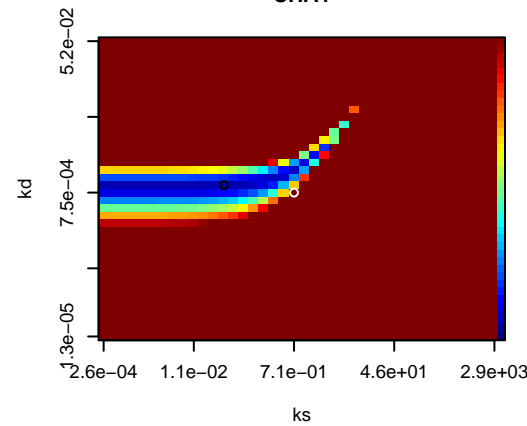

MET6

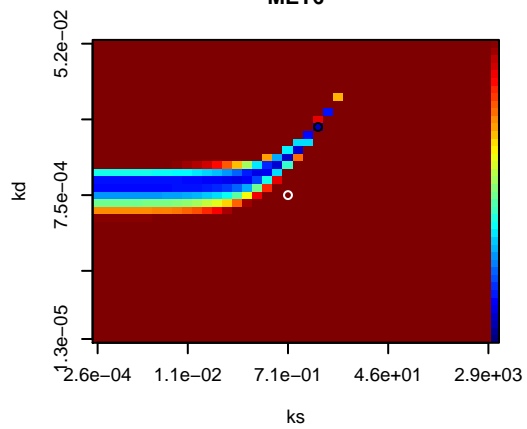

ILV5

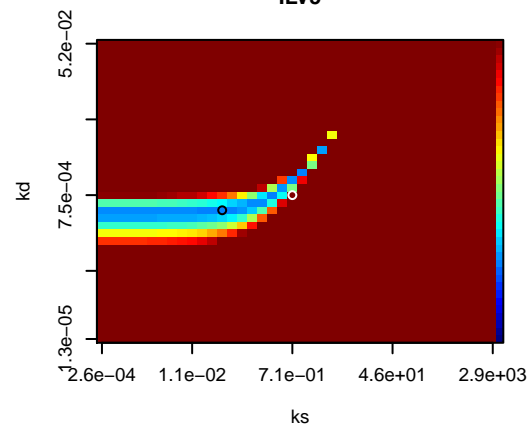

URA7

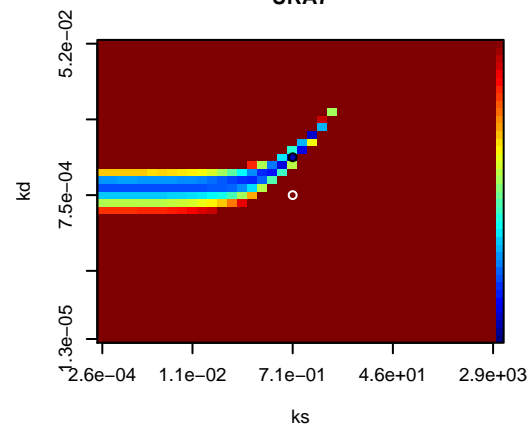

ZPR1

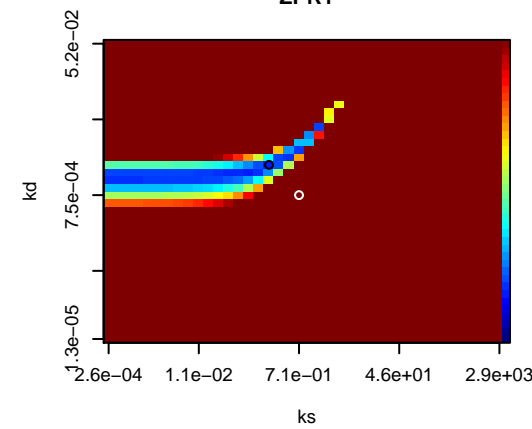

FRE1

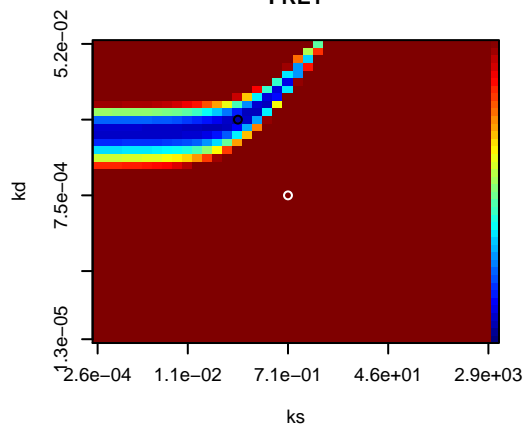

CIC1

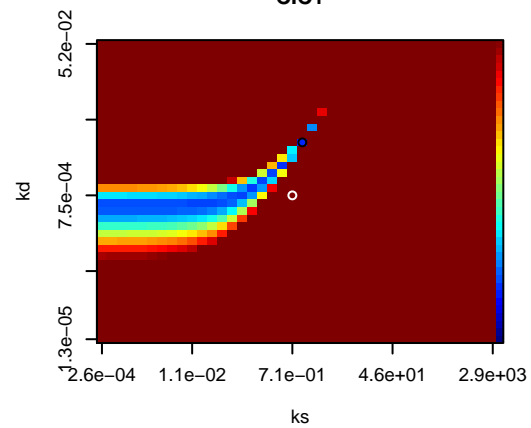

YVH1

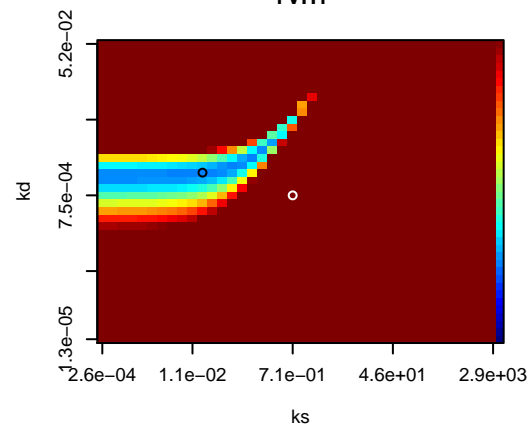

AAH1

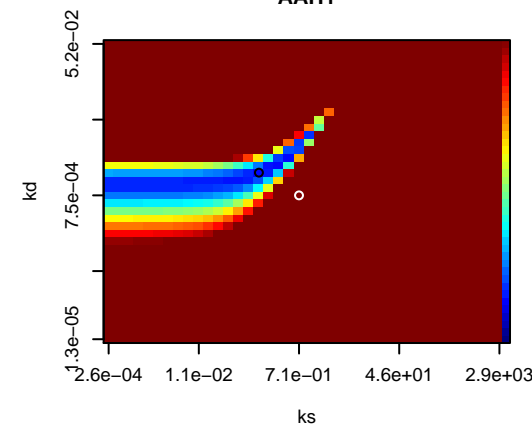

ADE17

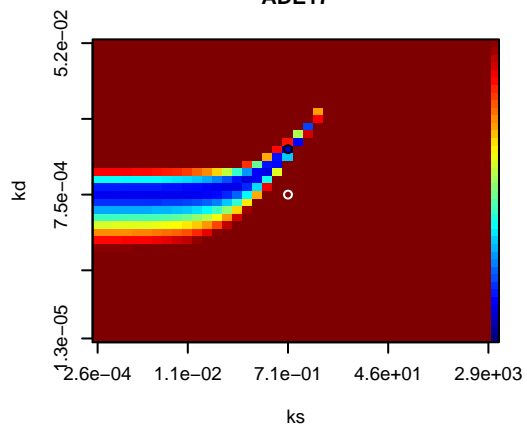

KAR2

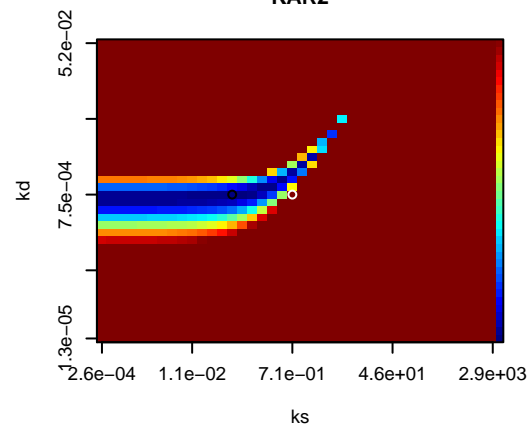

HGH1

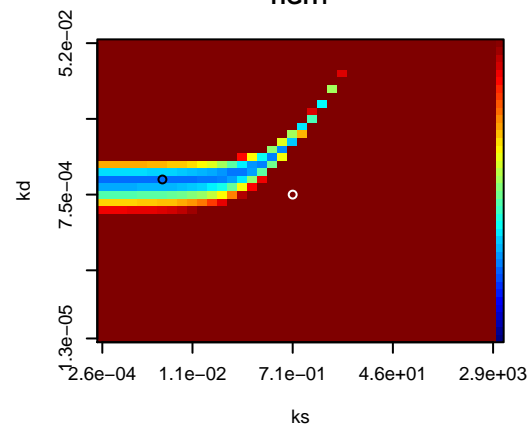

ARX1

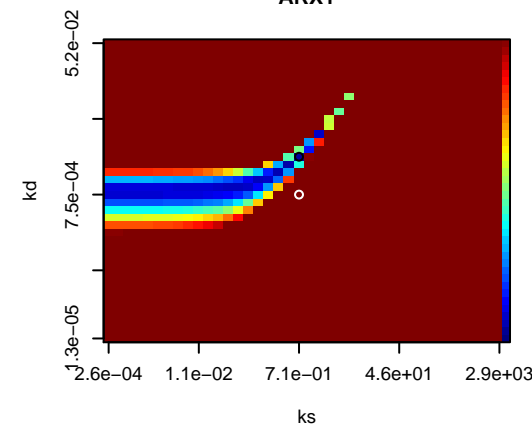

SVF1

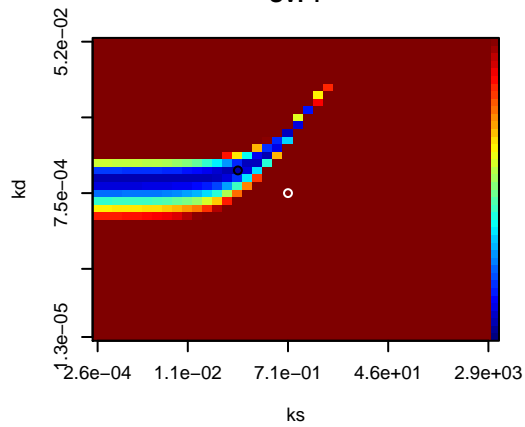

YDJ1

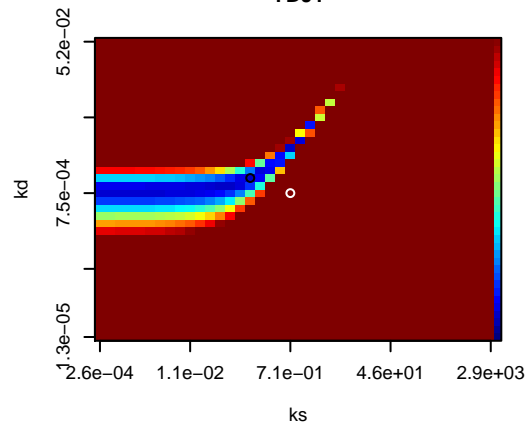

UTP7

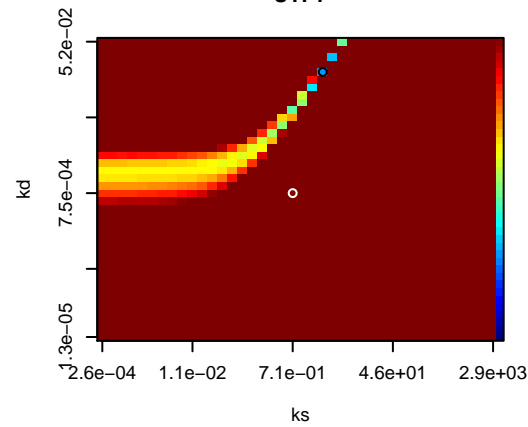

HEM3

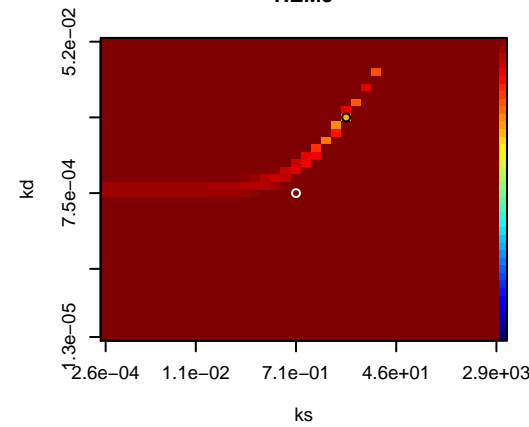

MNS1

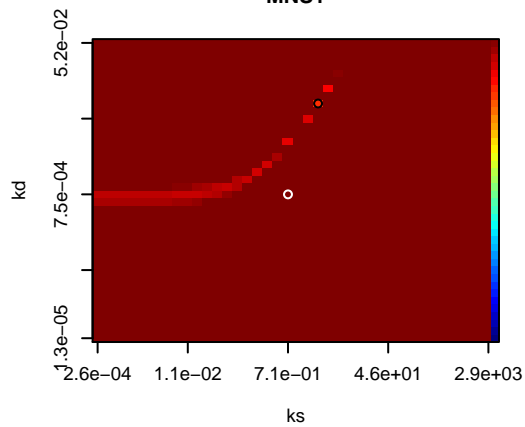

LSG1

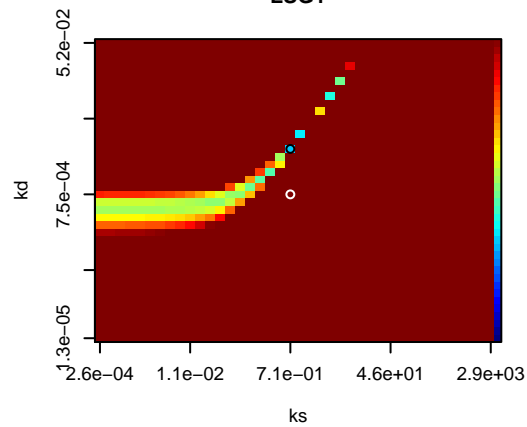

GPD2

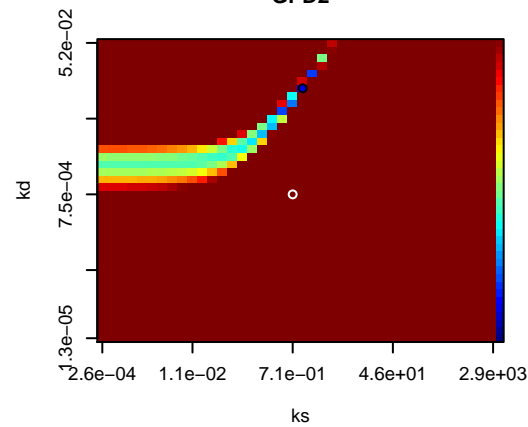

TRM10

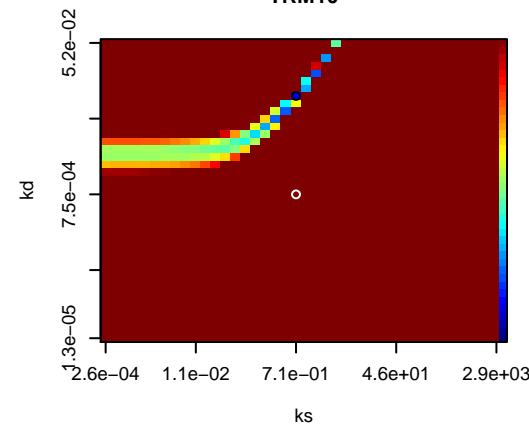

PXR1

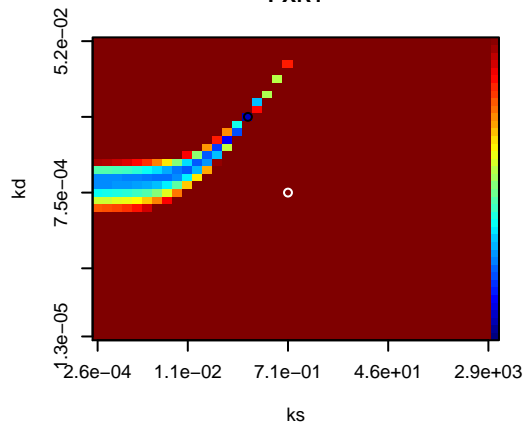

ERB1

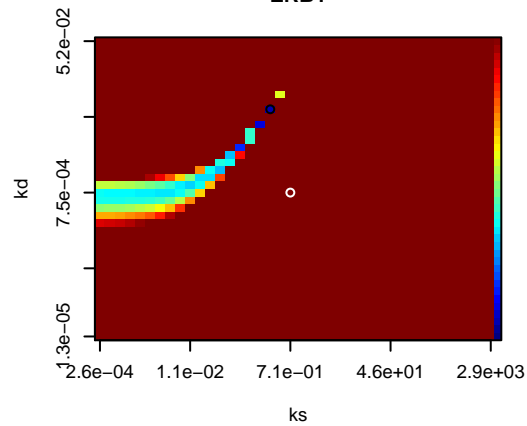

RRP8

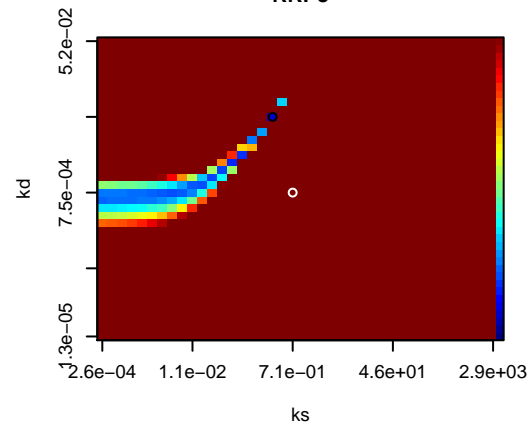

RPC37

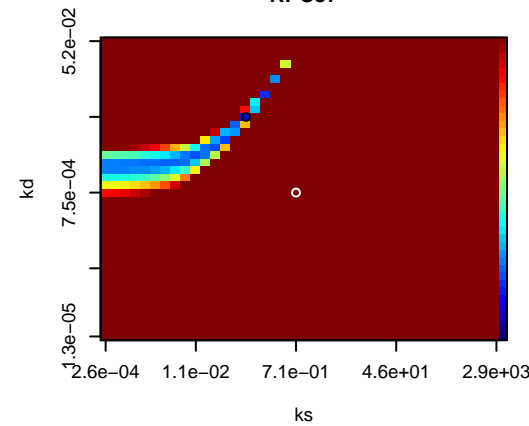



RPF1

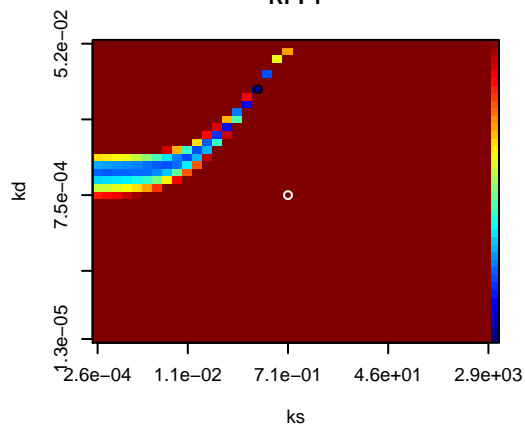

DUT1

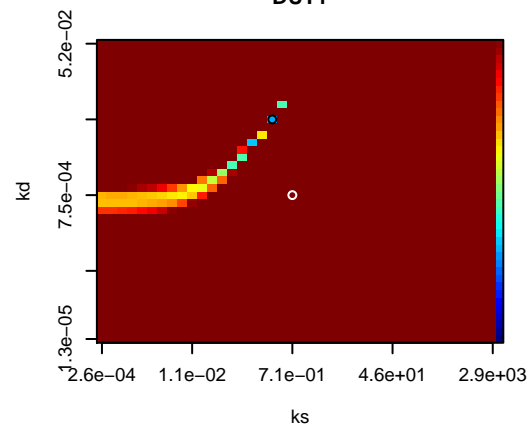

GUK1

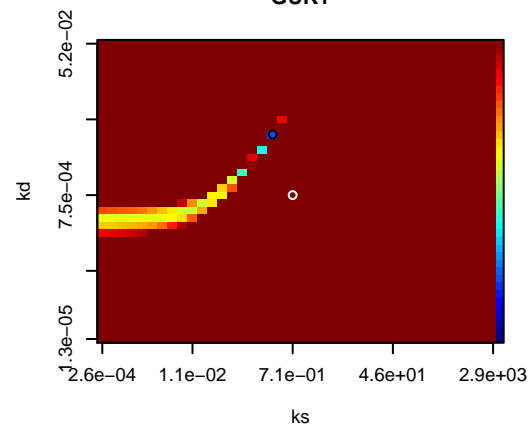

KEL1

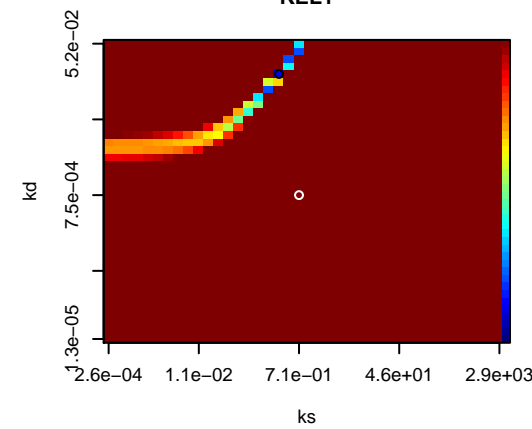

PRE3

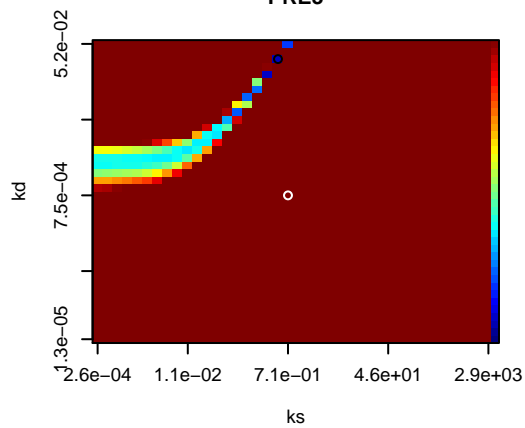

CBF5

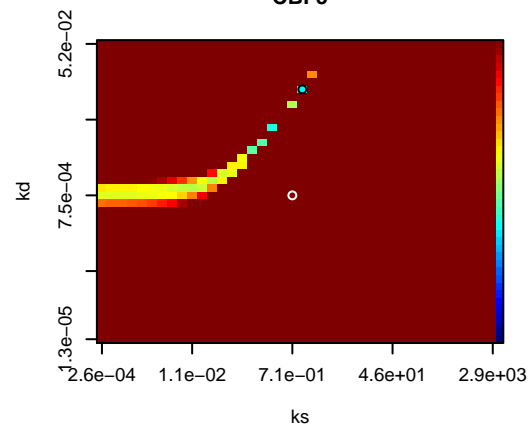

FYV7

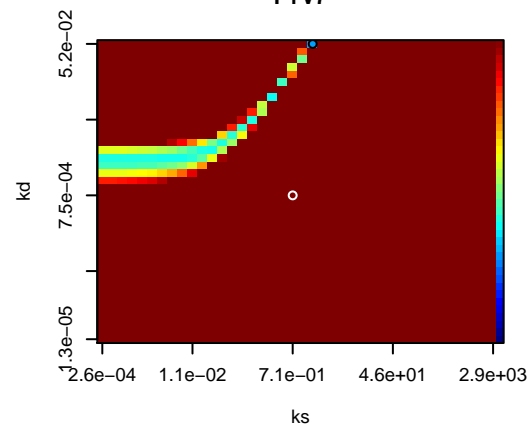

NSA2

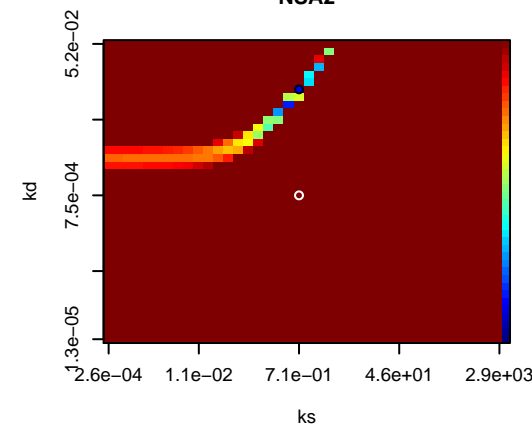

ITC1

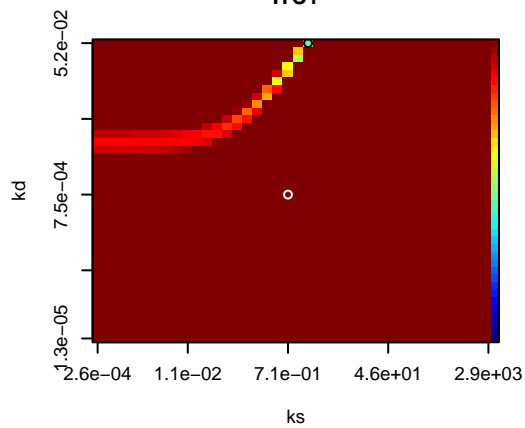

MES1

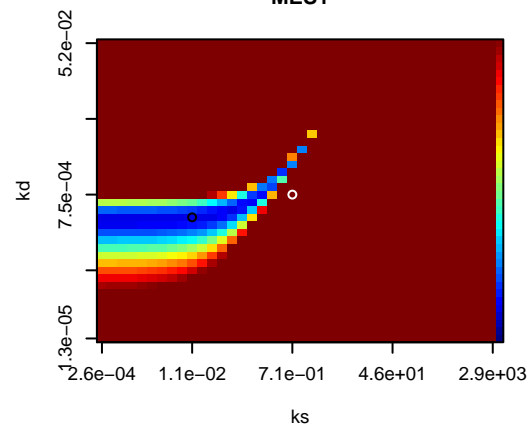

UTP8

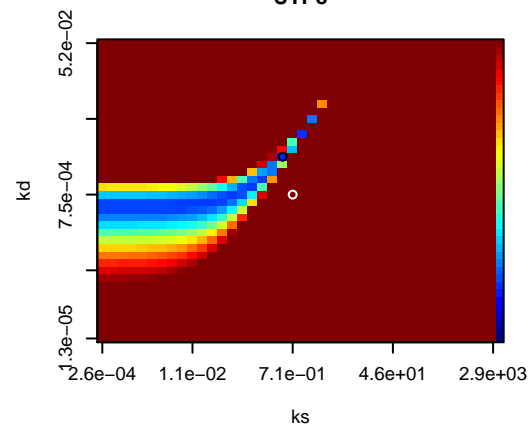

THR1

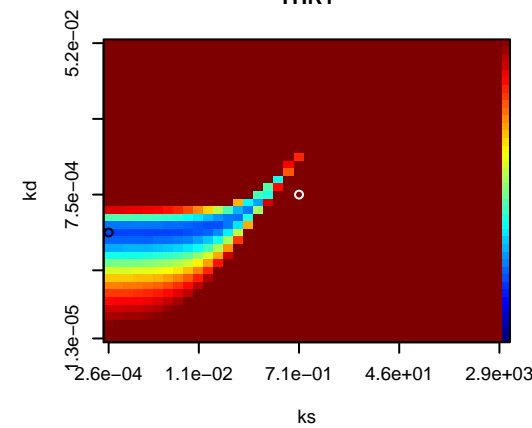

NOC4

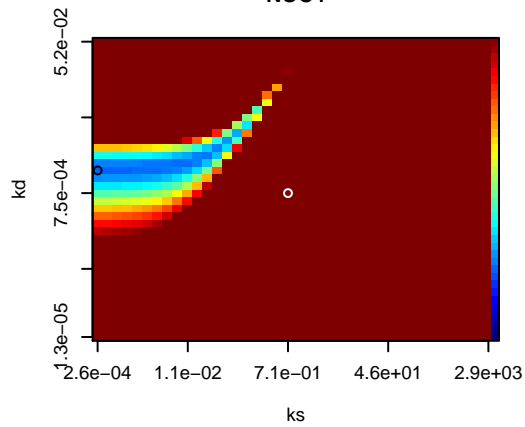

FSF1

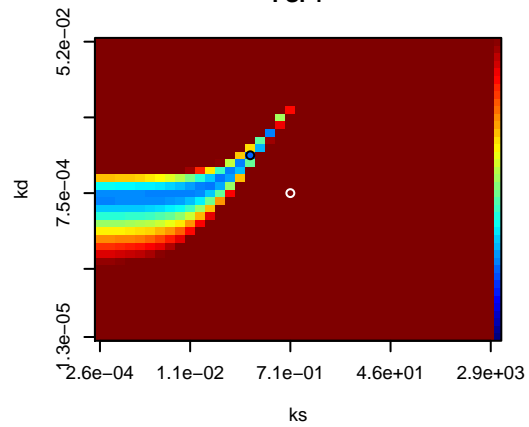

ADE5-7

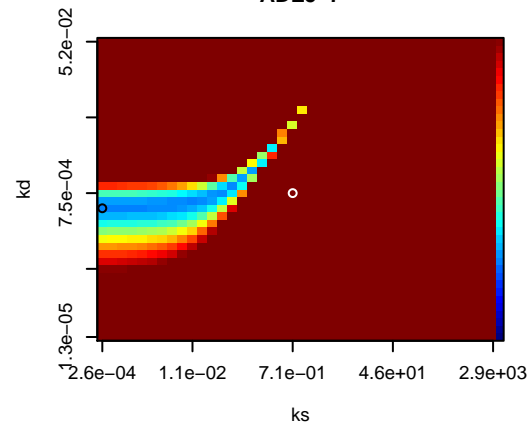

RLP7

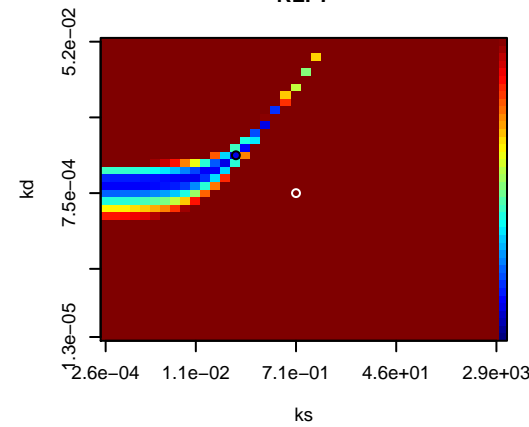

NOB1

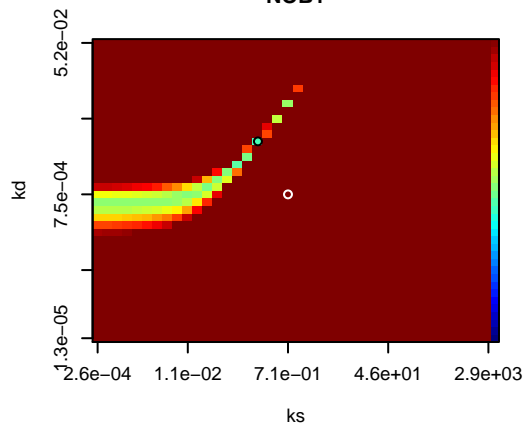

YGL039W

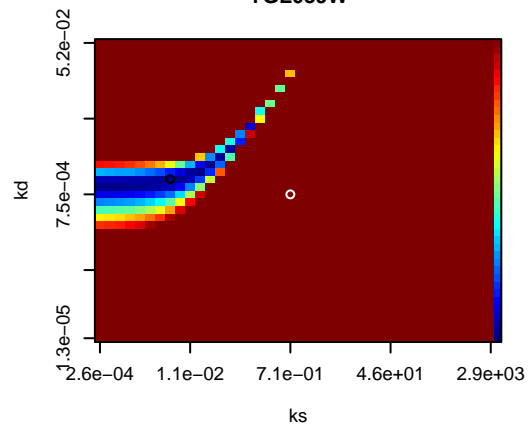

VTC2

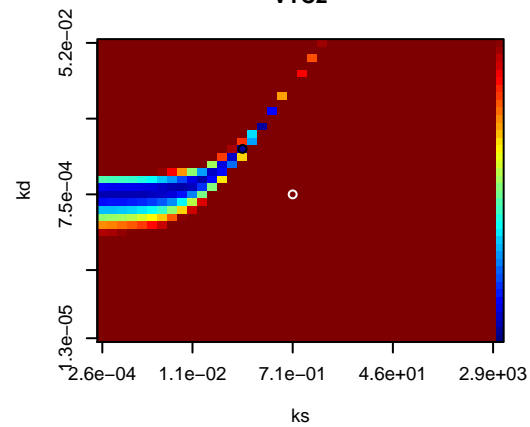

ADE3

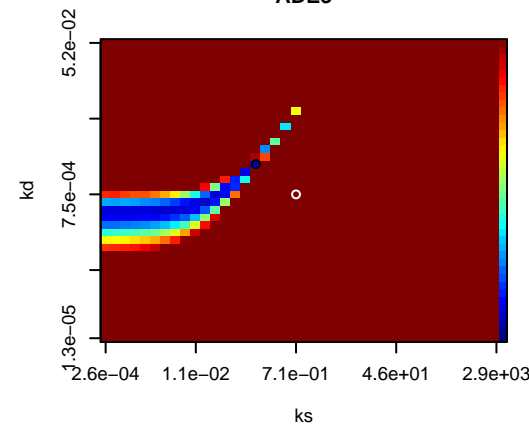

NOP4

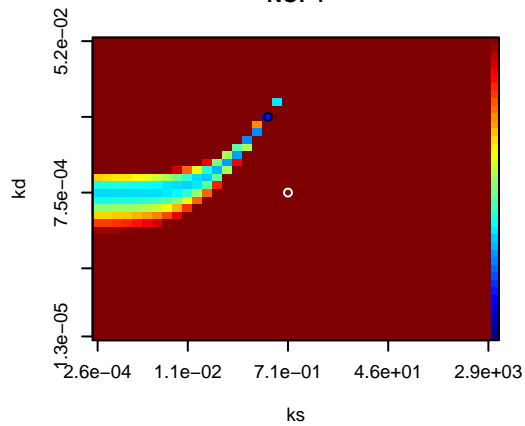

IKI3

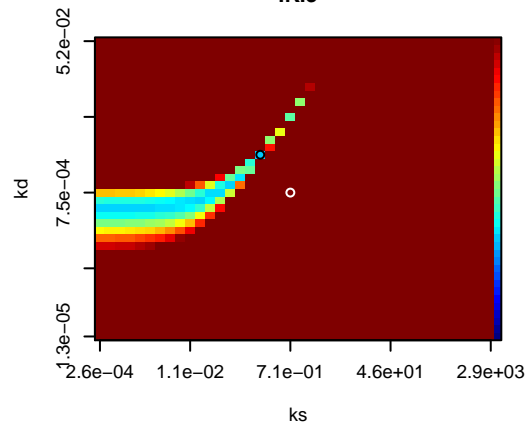

HCH1

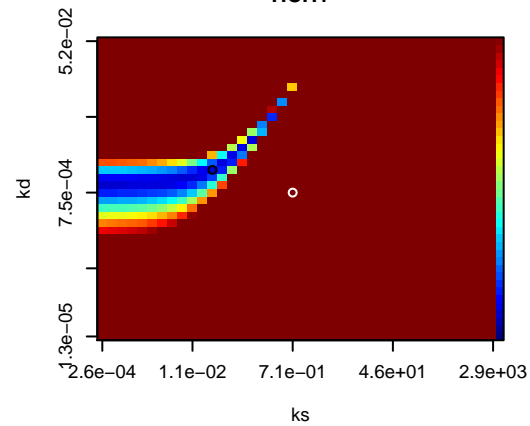

PEX19

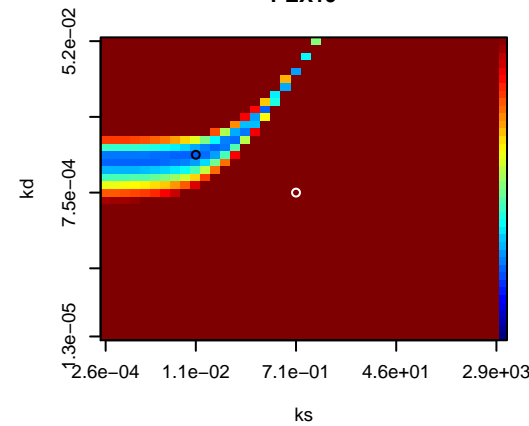

MXR1

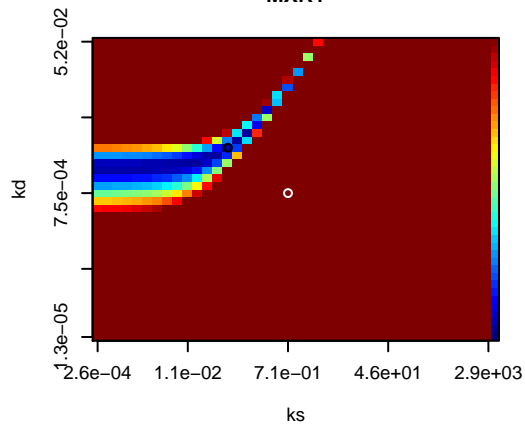

YHB1

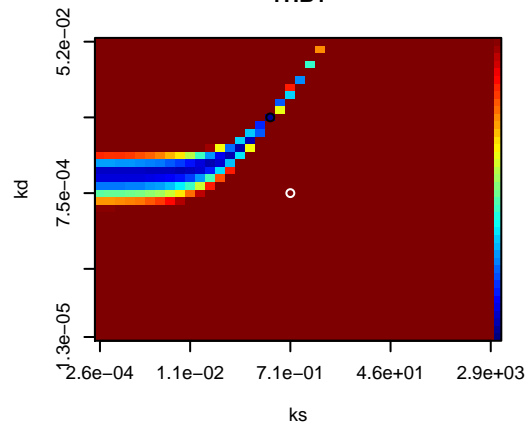

TIF11

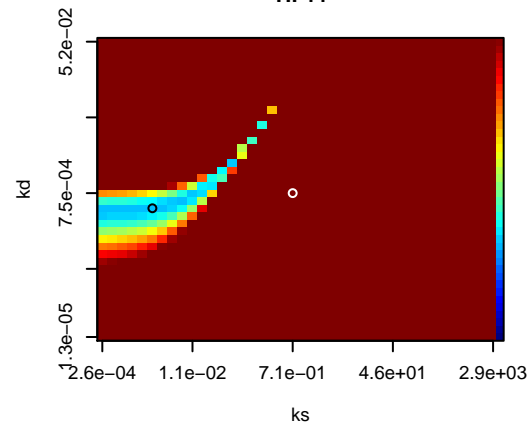

OYE2

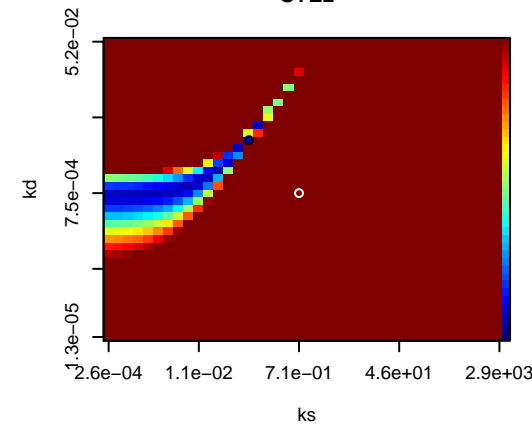

CKA2

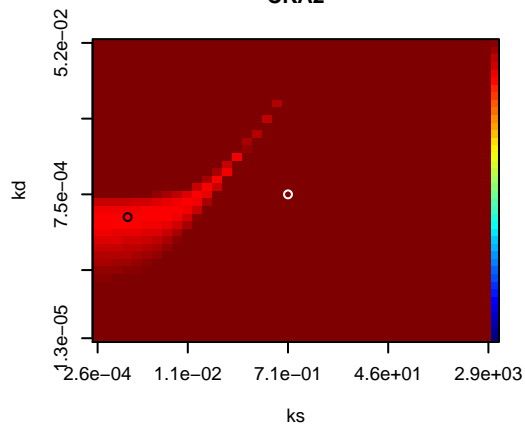

RPS10A

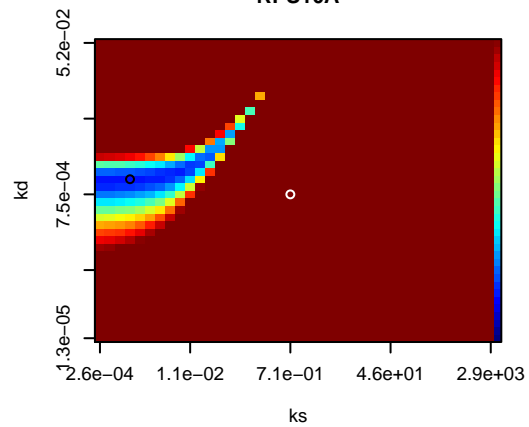

NSA1

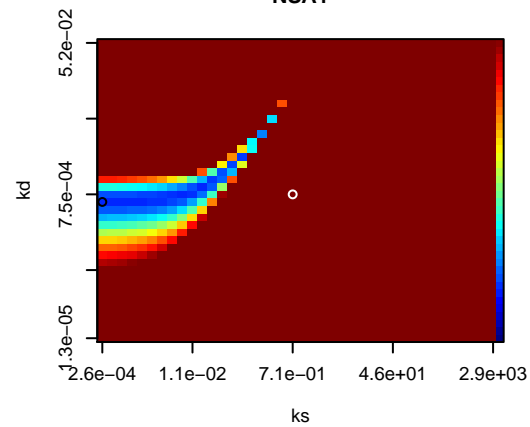

NUP145

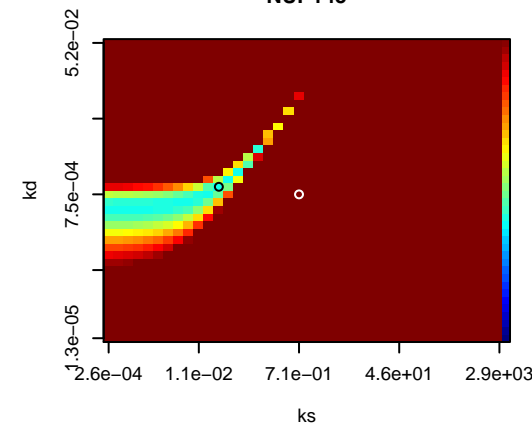

CKB1

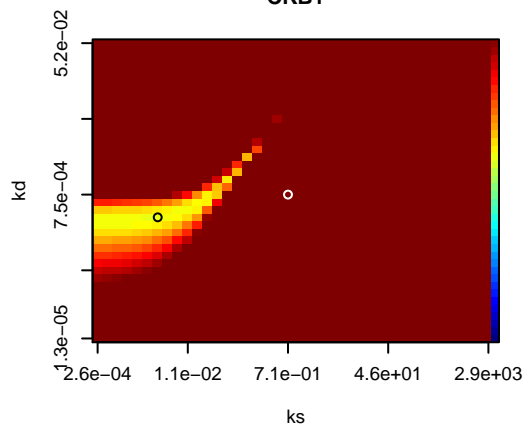

PDR12

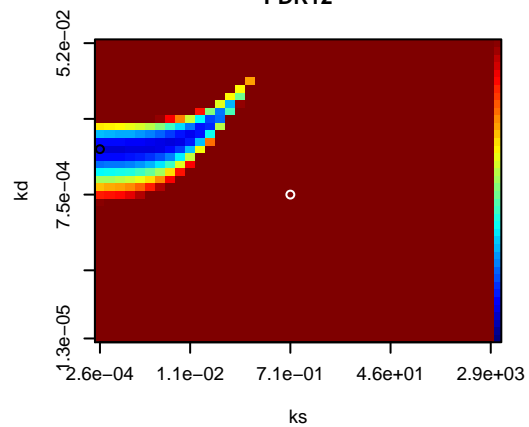

PRS5

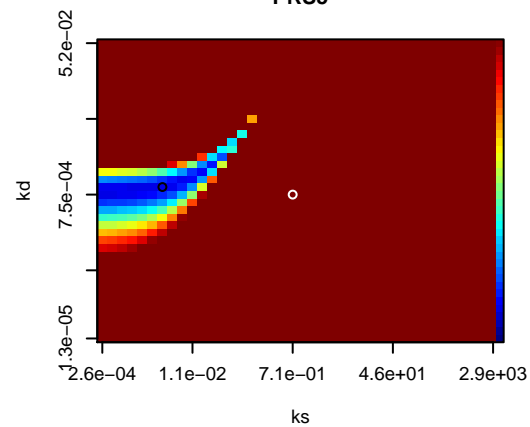

FMP41

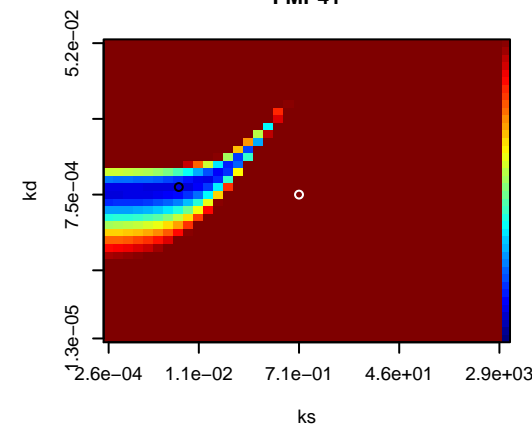

NMD3

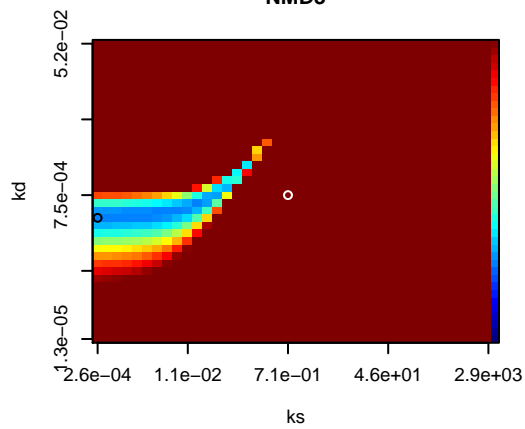

CYC1

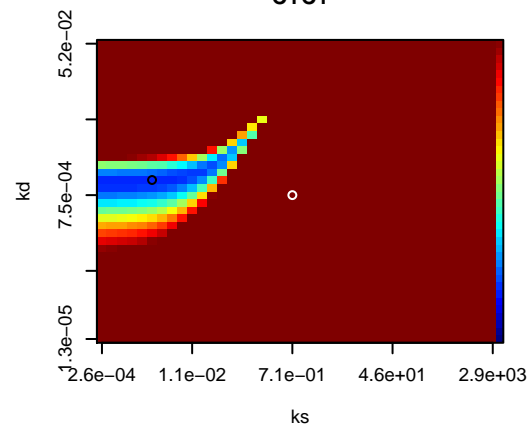

HSC82

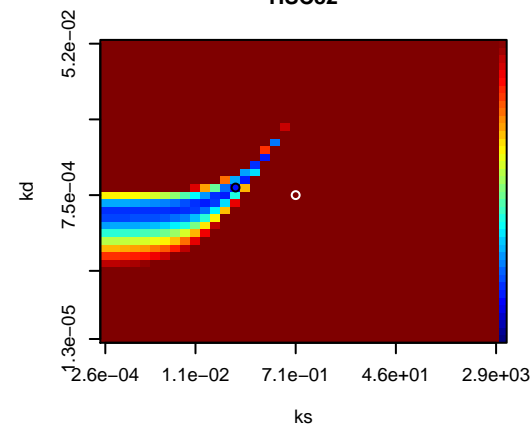

YDL121C

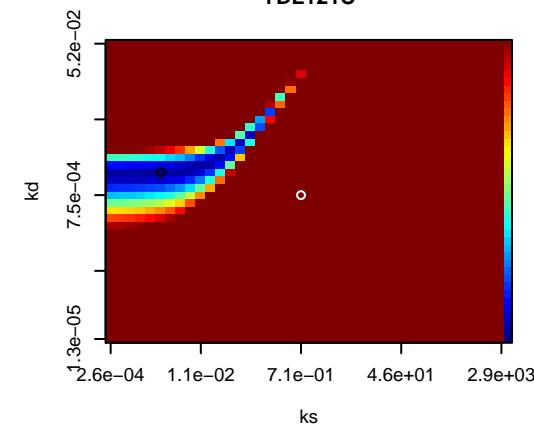

NAN1

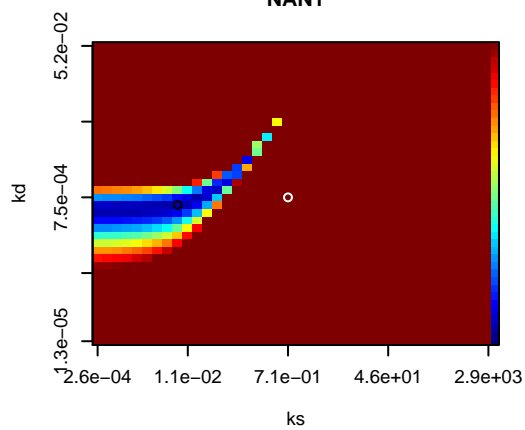

RPS25B

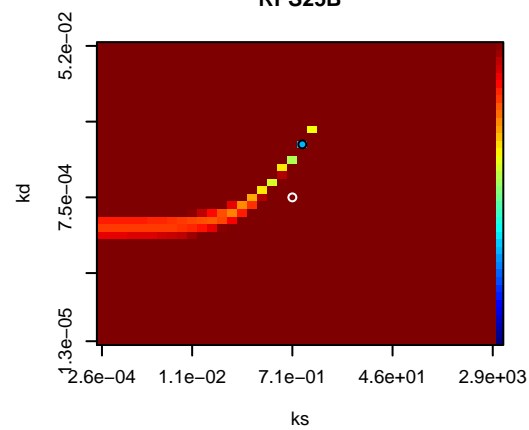

APT1

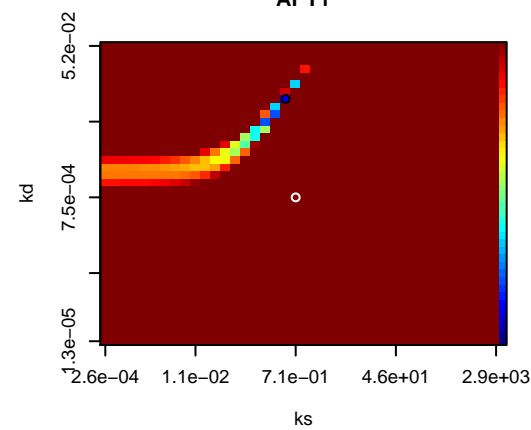

SER2

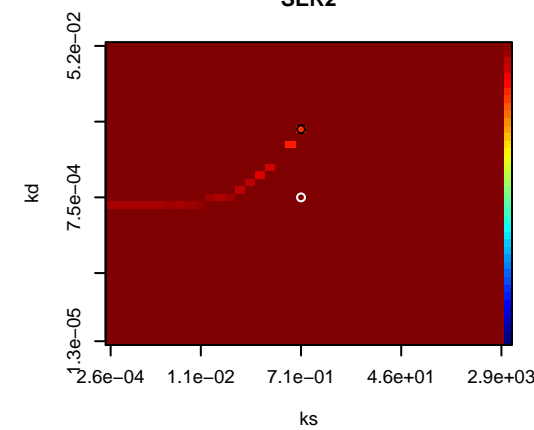

DBP3

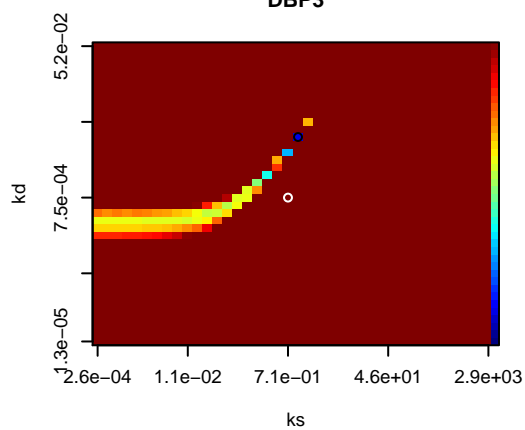

YLR126C

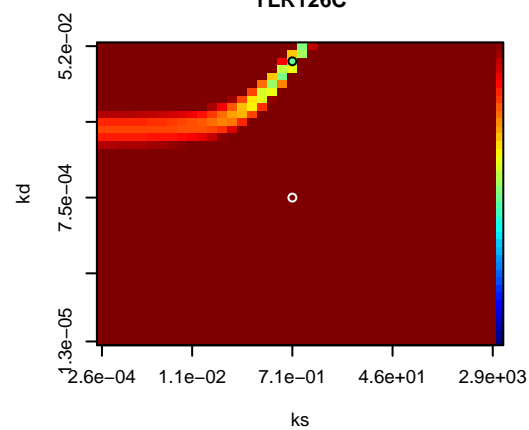

RPC19

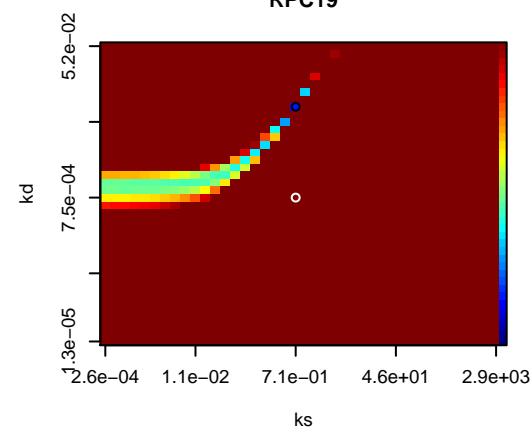

DIP2

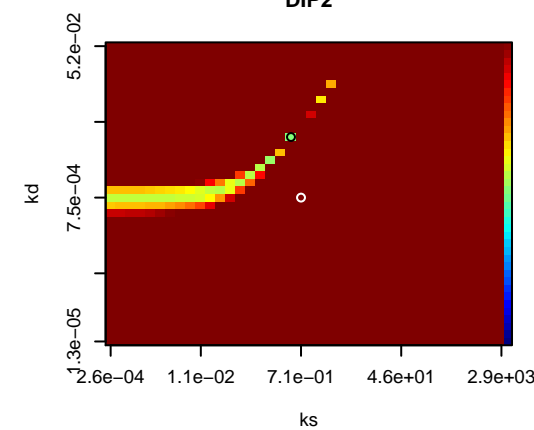

TRM112

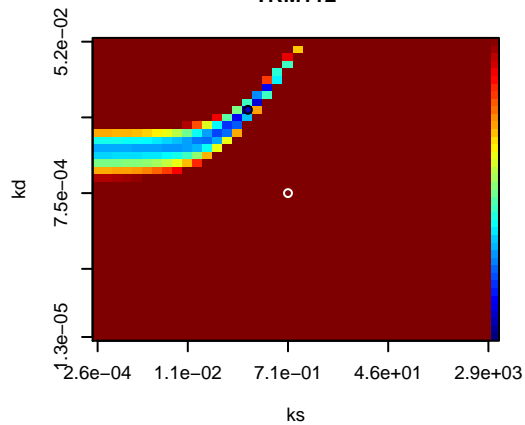

RPS18B

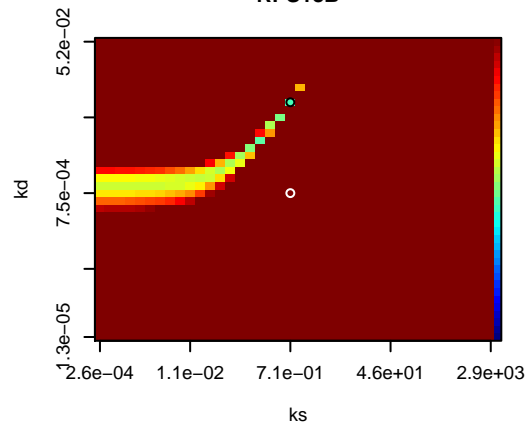

RIA1

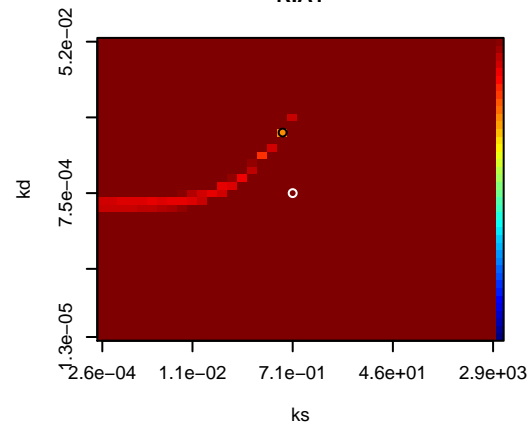

ECM1

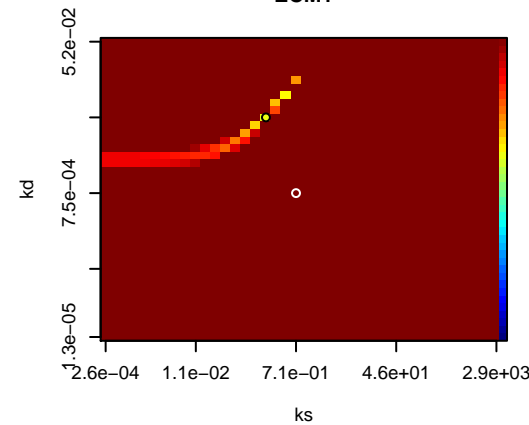

FAS1

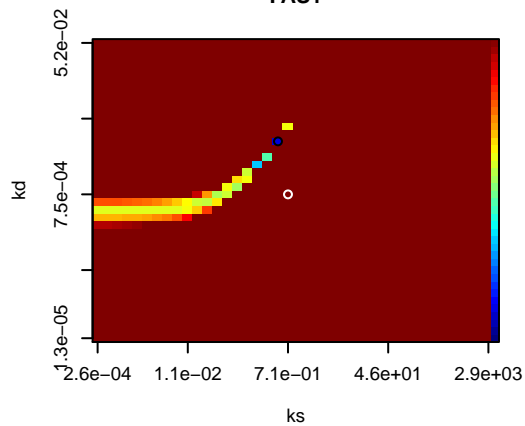

GCD10

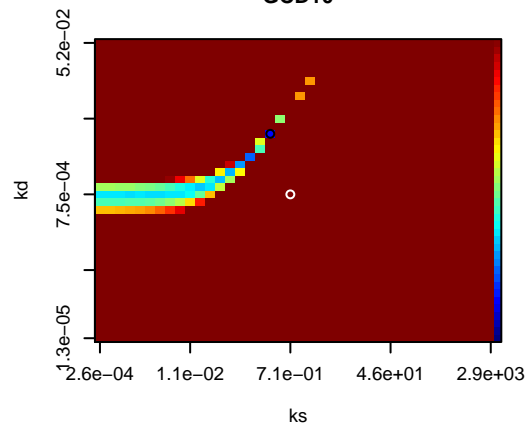

MRT4

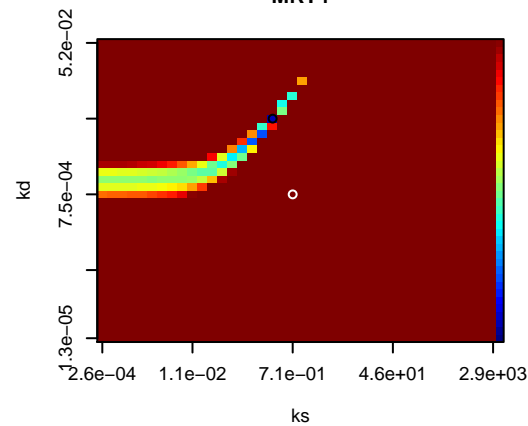

MIS1

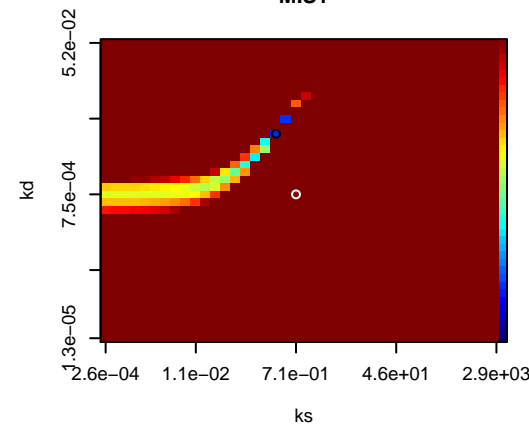

RPA12

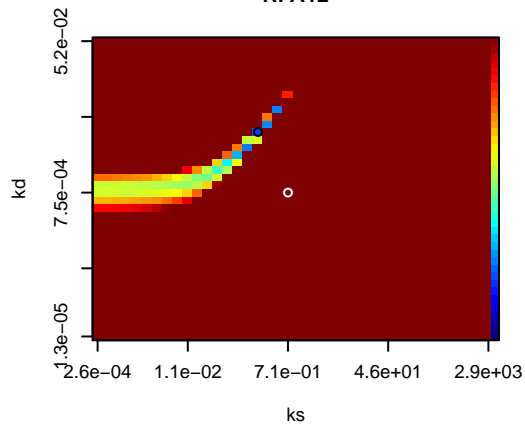

MNN5

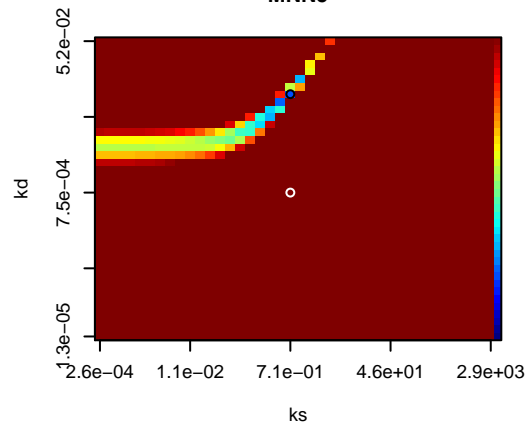

MCM3

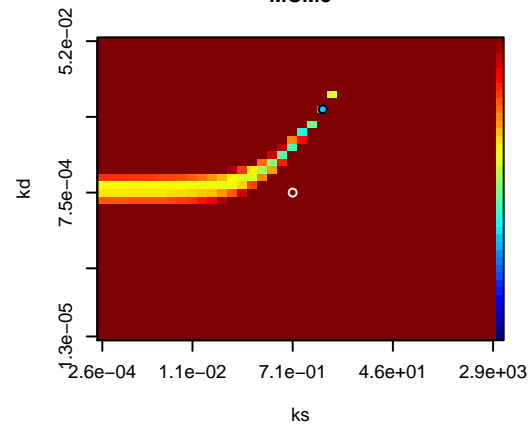

GCD6

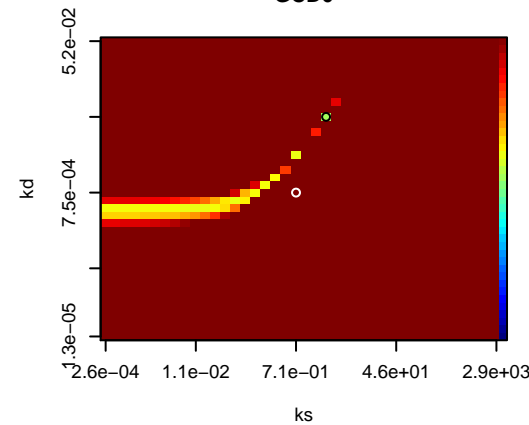

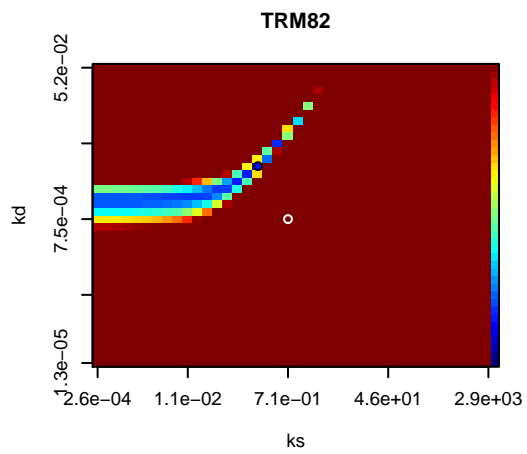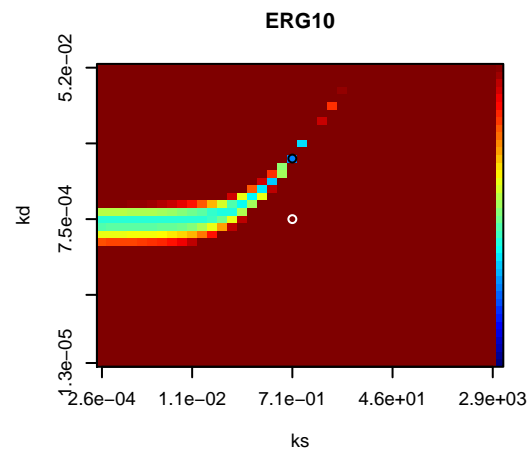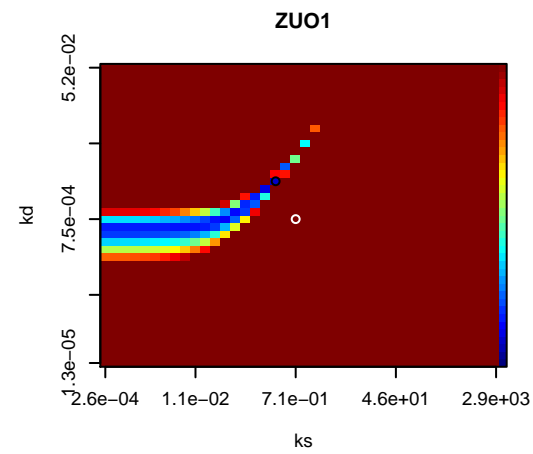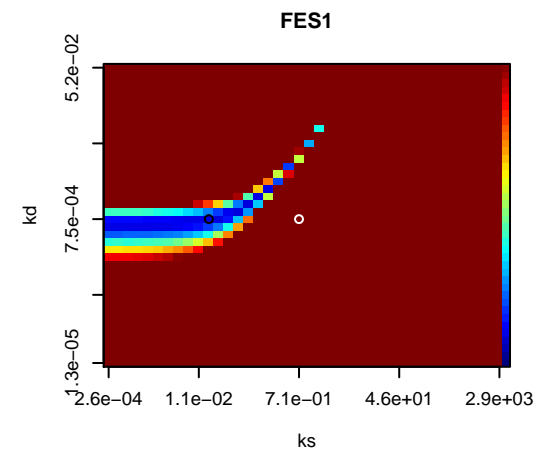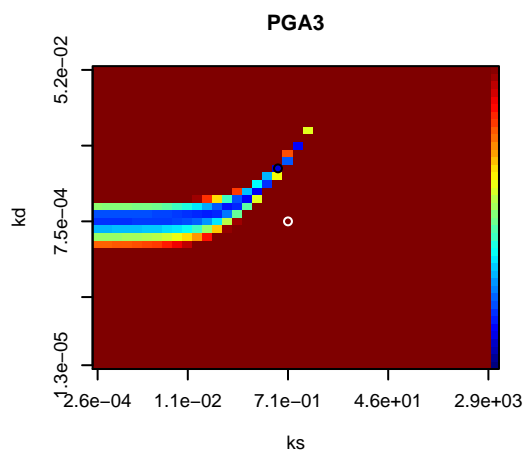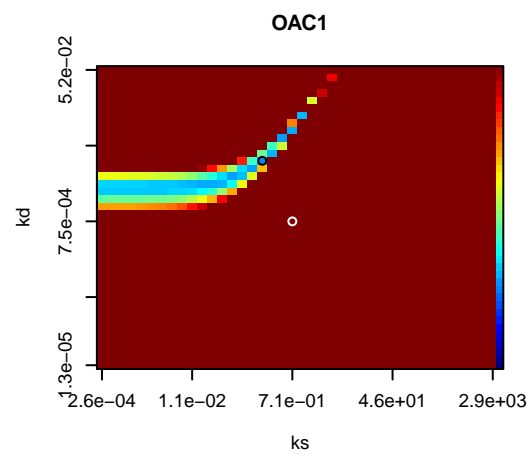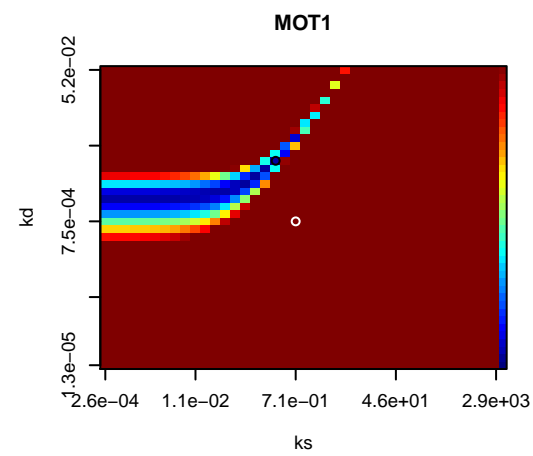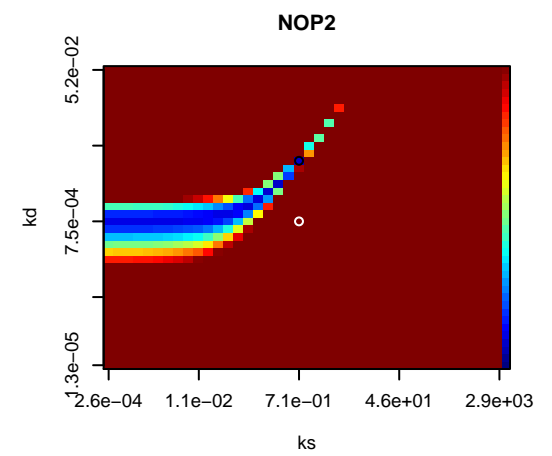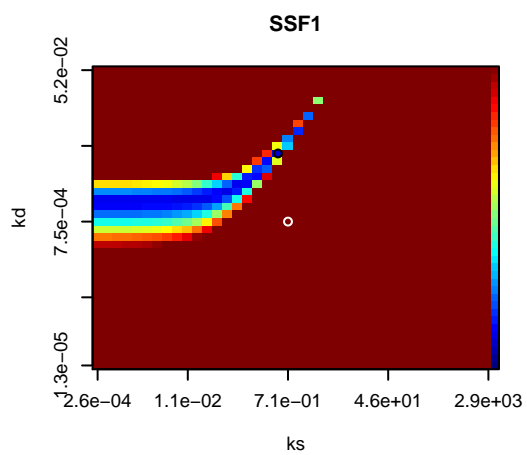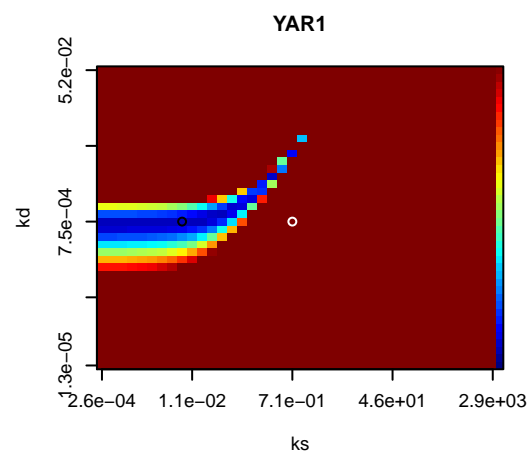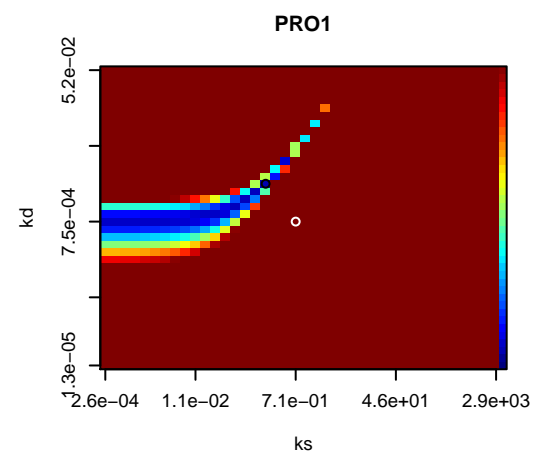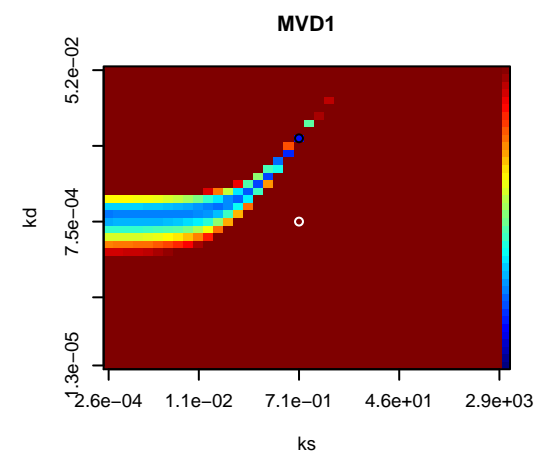

MMF1

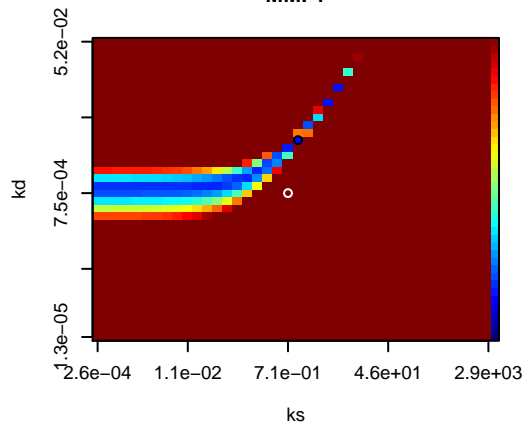

EFG1

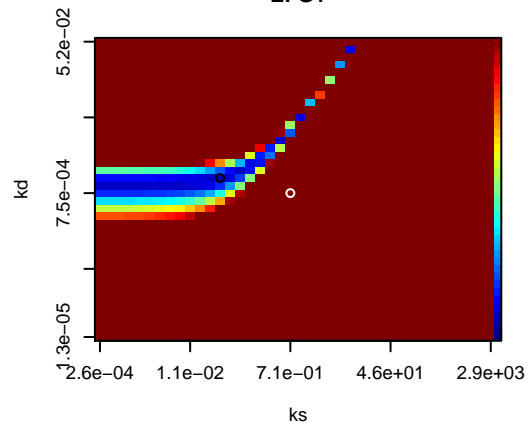

BFR2

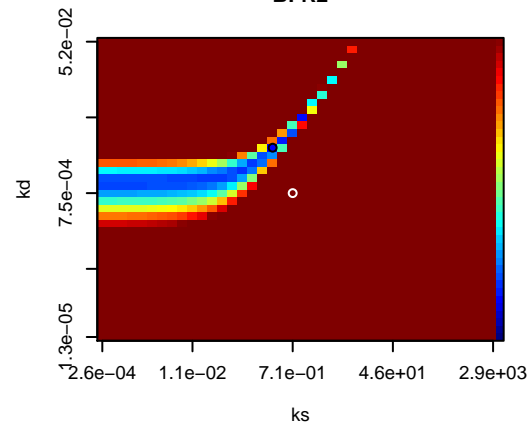

RPL37B

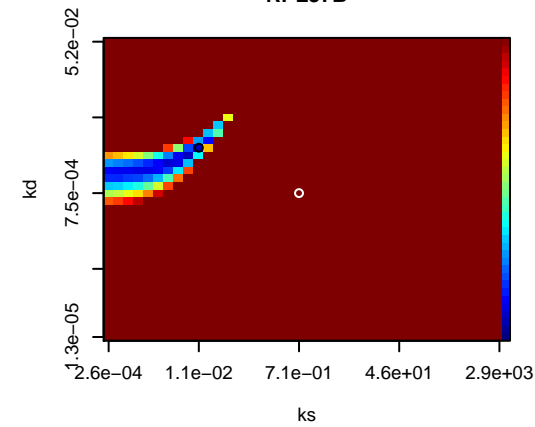

MEU1

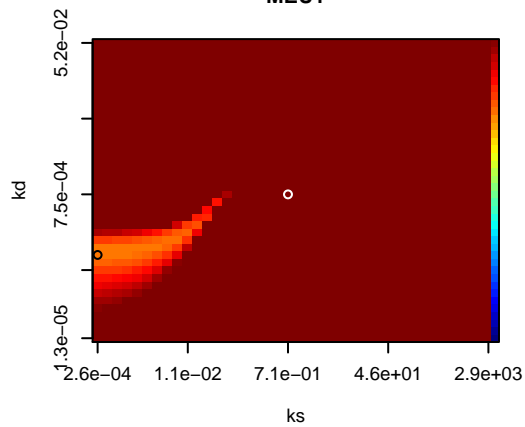

SCH9

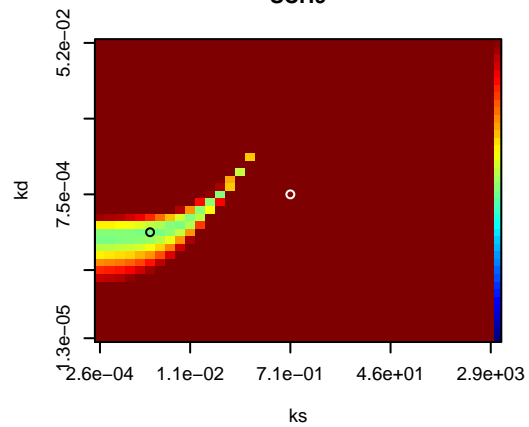

ECM16

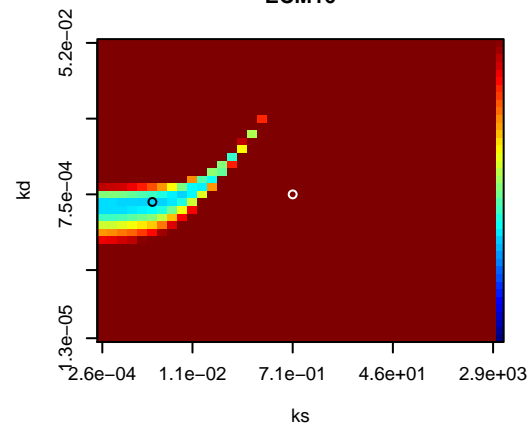

SIS2

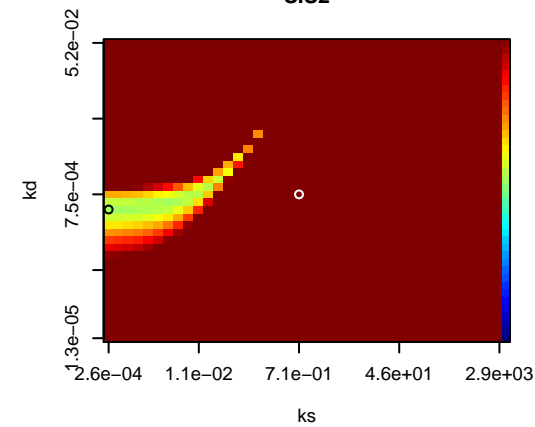

ERG13

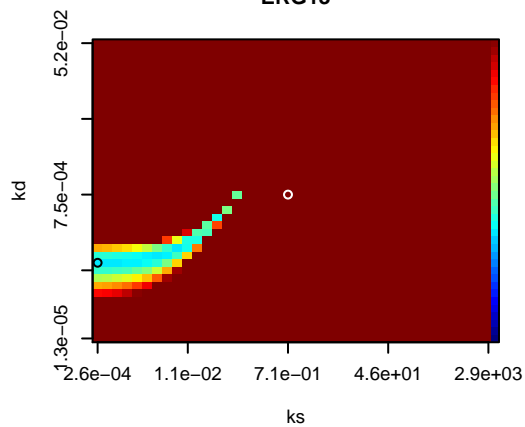

TMA19

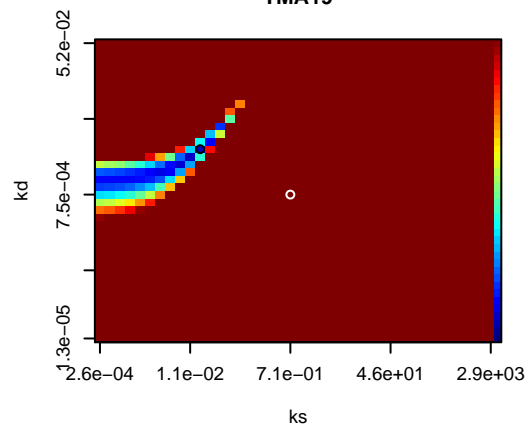

SRP101

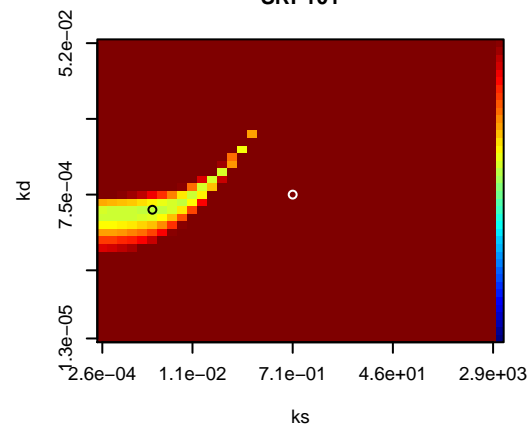

IMD4

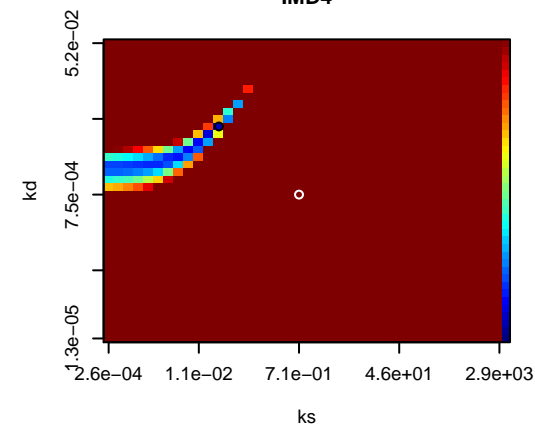

RPA190

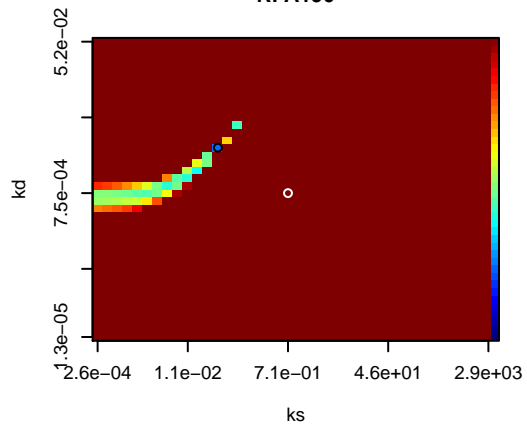

RPL16A

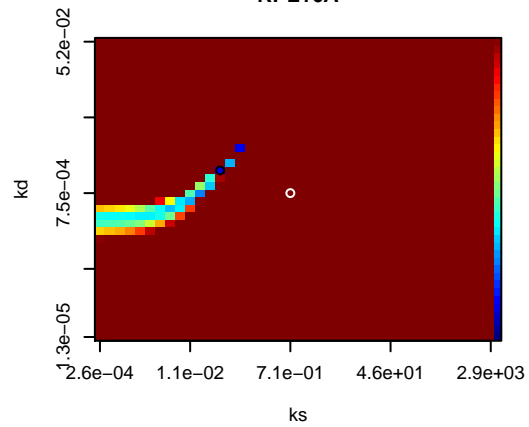

YLR179C

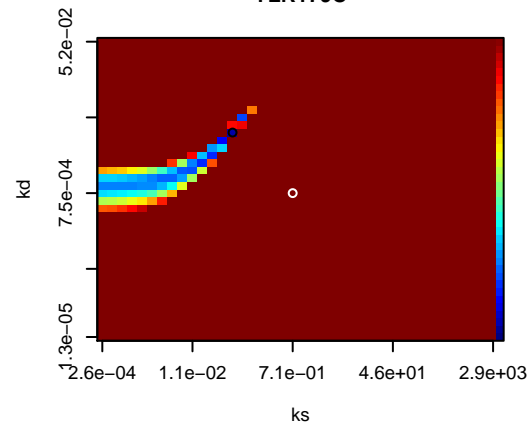

TIF6

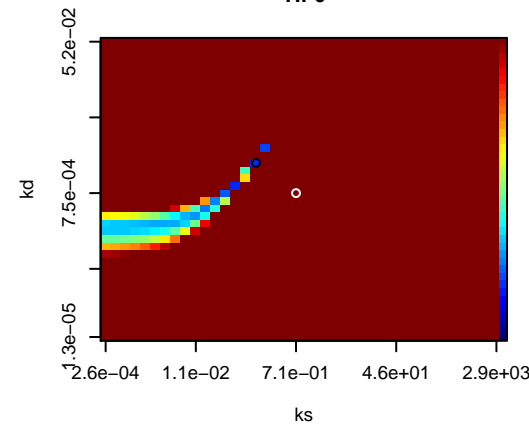

RPS29A

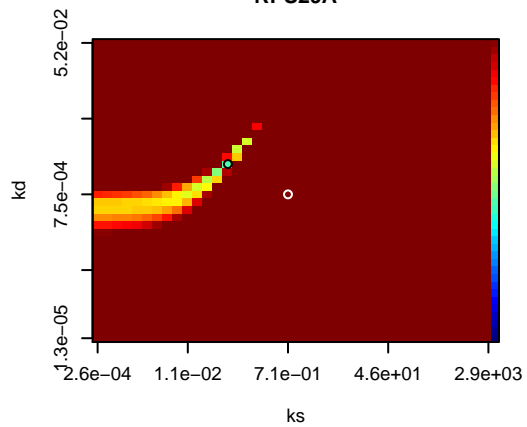

RPL40B

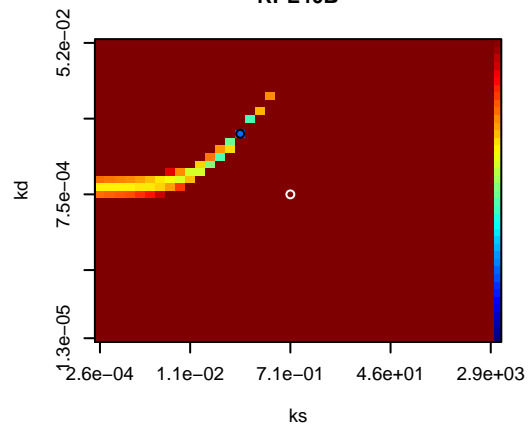

SUA5

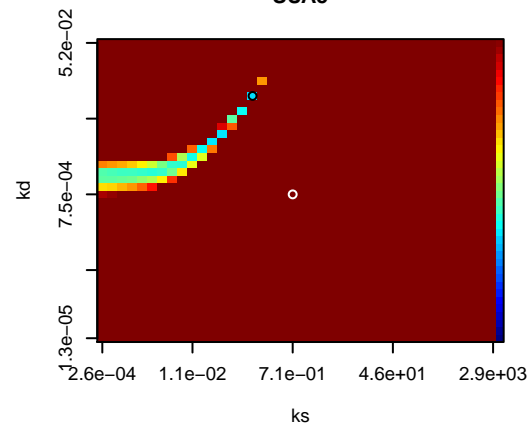

SEC63

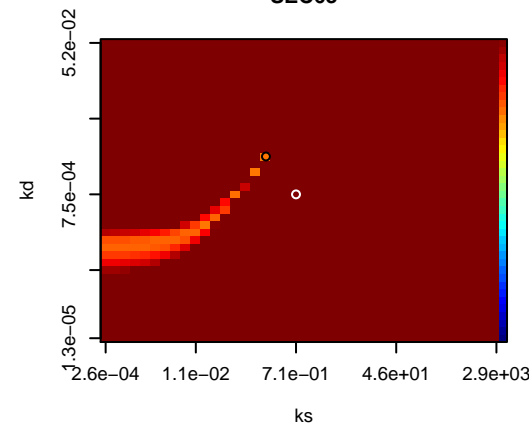

TRL1

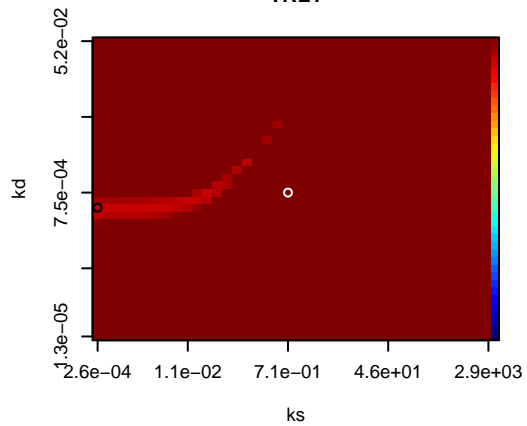

PHO81

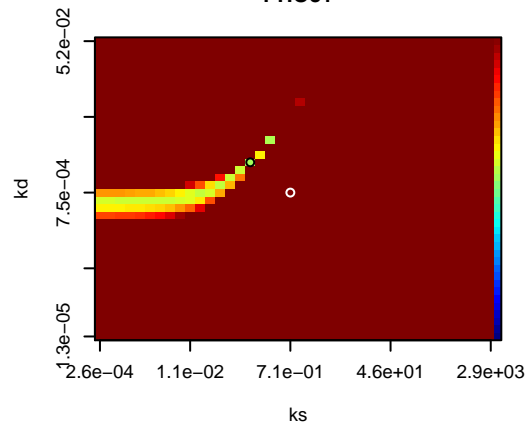

GLY1

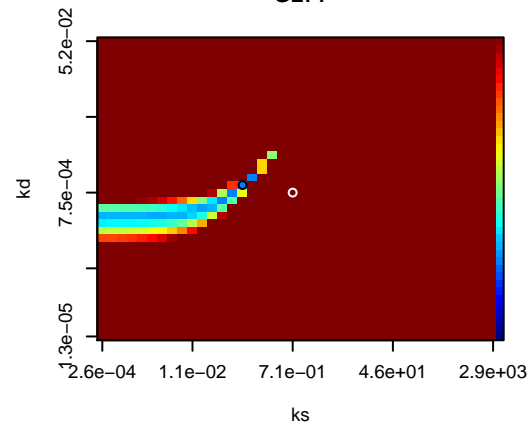

PRT1

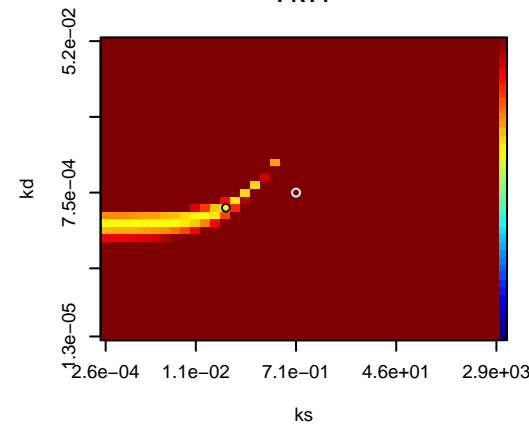



SHM1

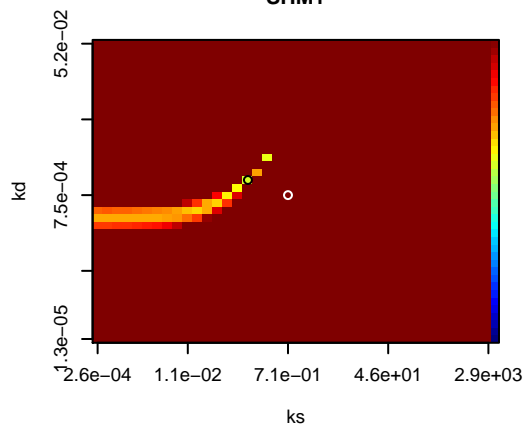

WTM2

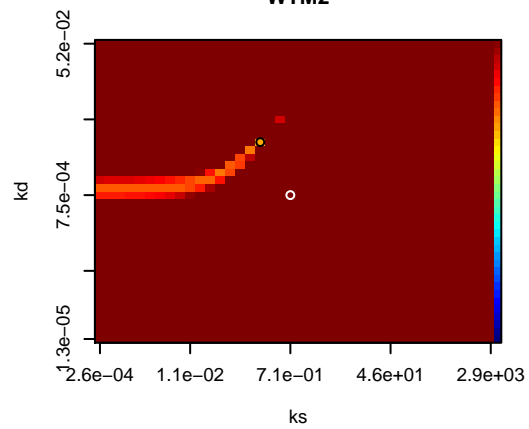

PWP2

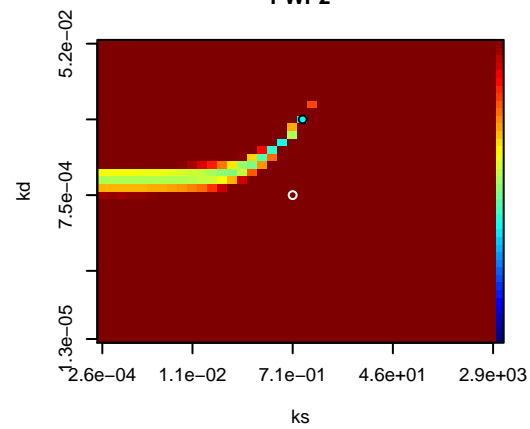

UTP10

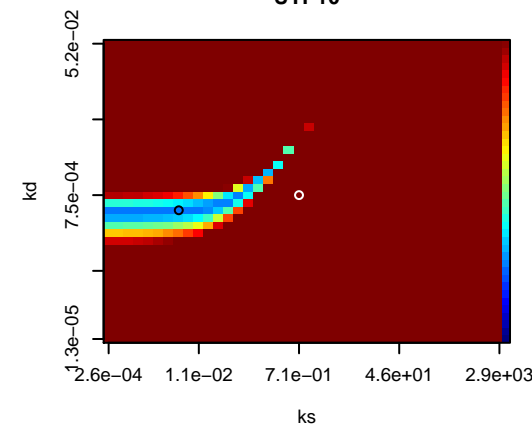

RPL24A

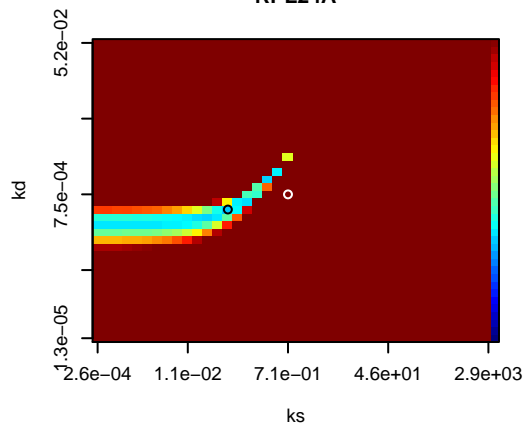

NOP16

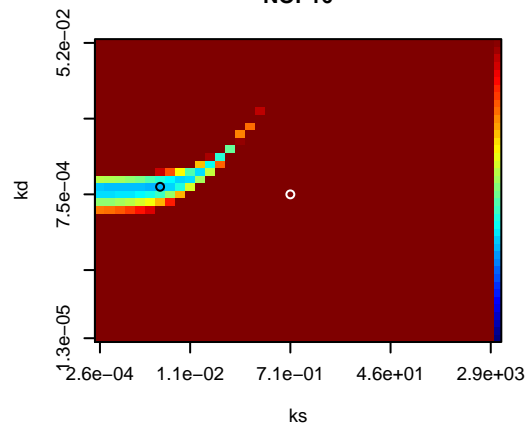

RKI1

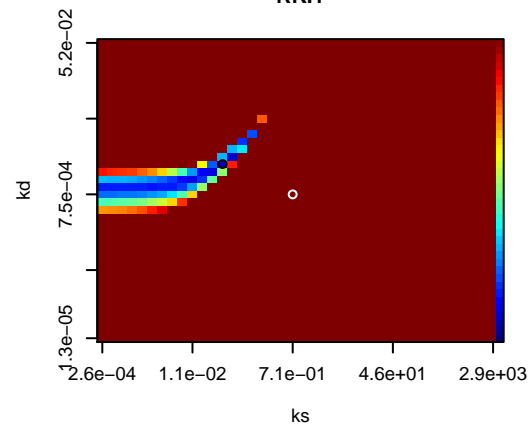

PRO3

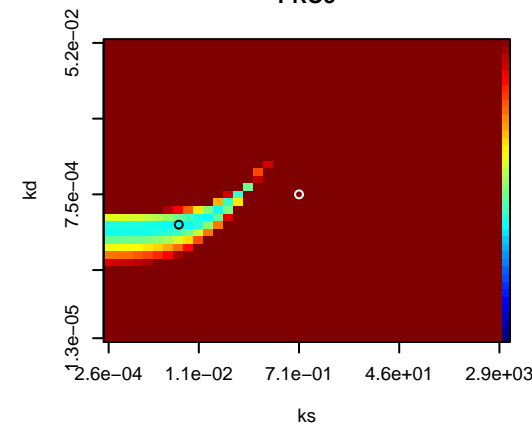

ILV2

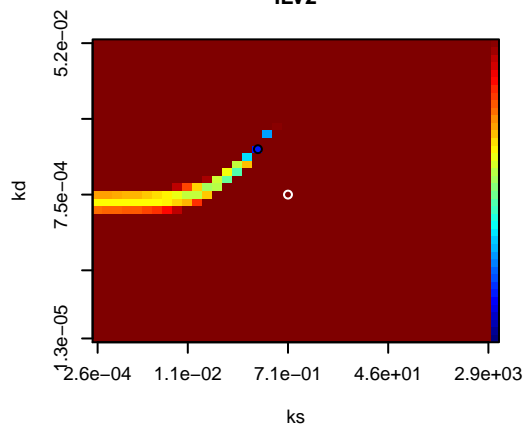

PRP43

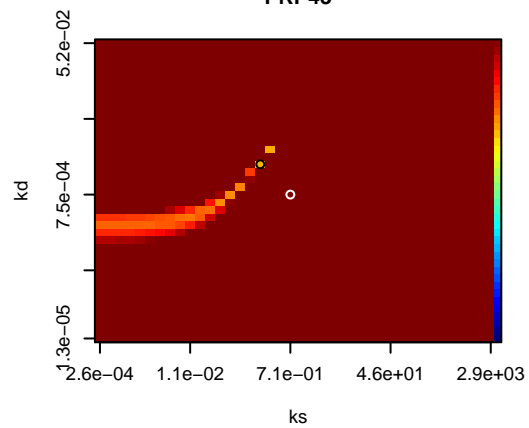

ERG3

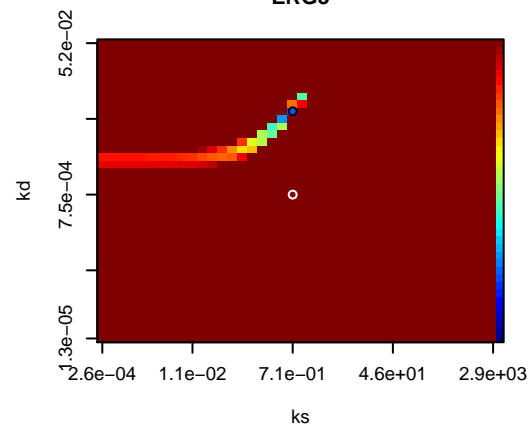

RRP5

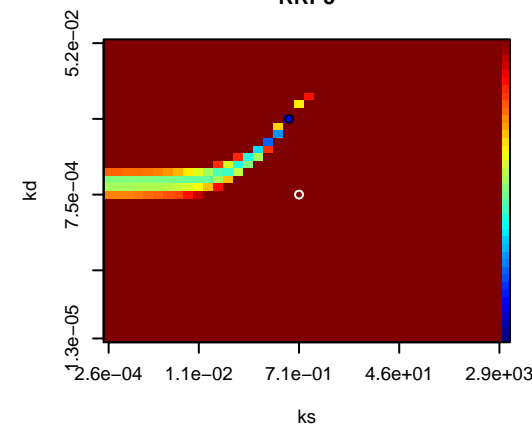

RPF2

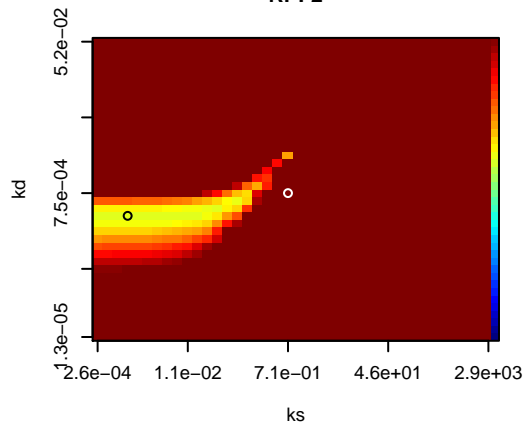

PWP1

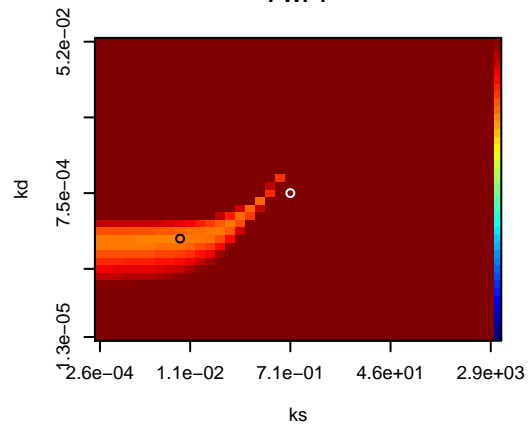

MTR4

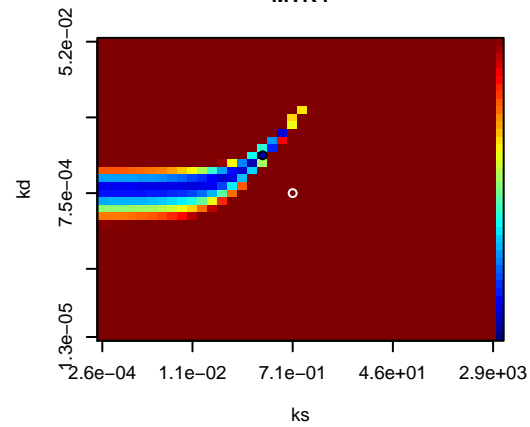

HMT1

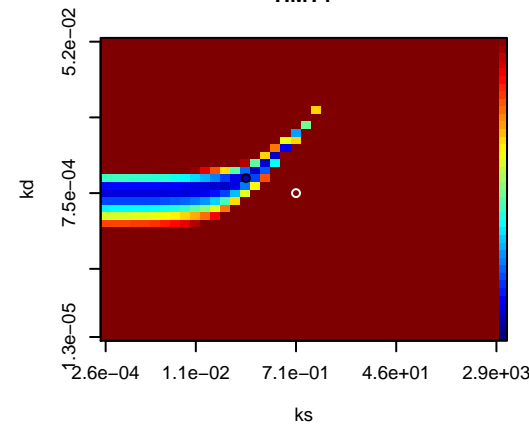

NSR1

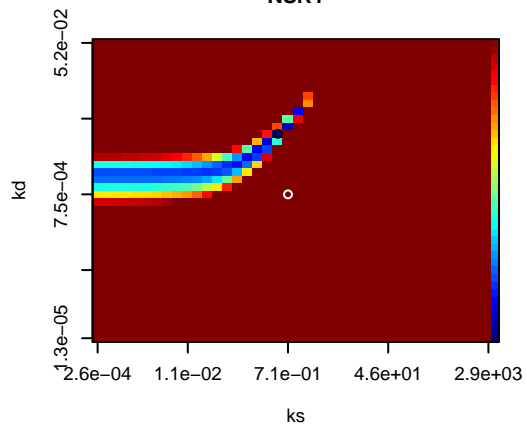

ERG1

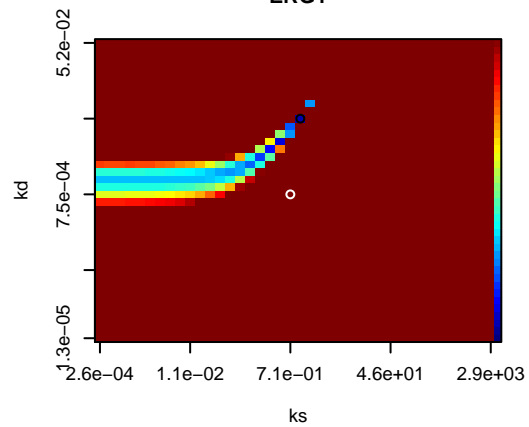

ADE6

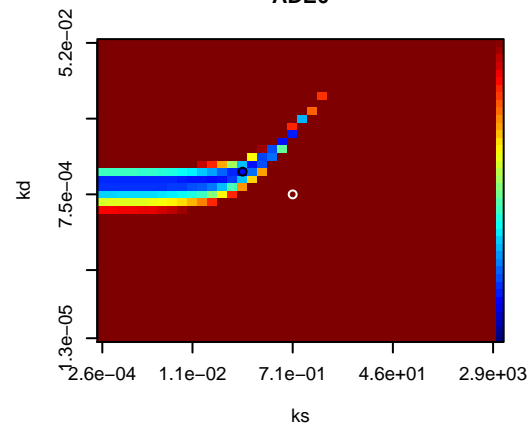

NCP1

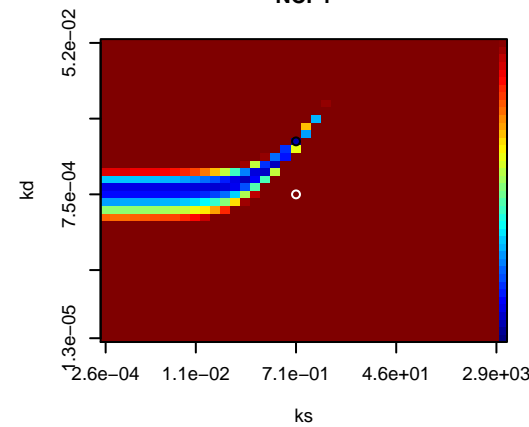

ENP1

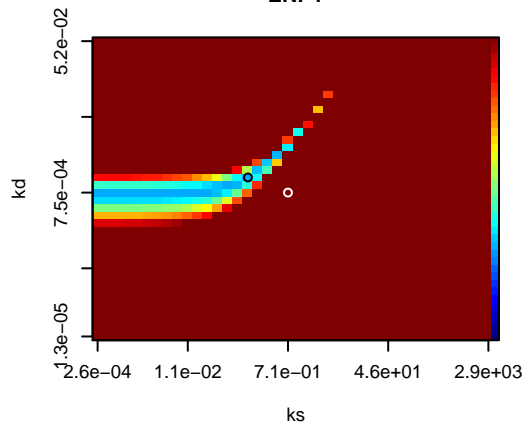

TRM1

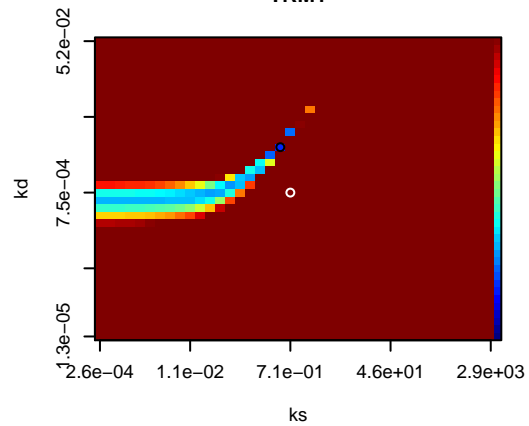

VTC3

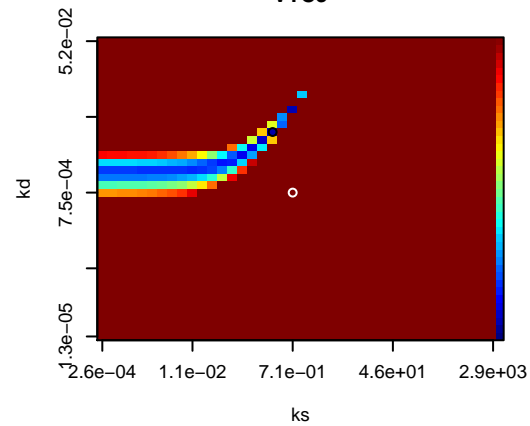

MAE1

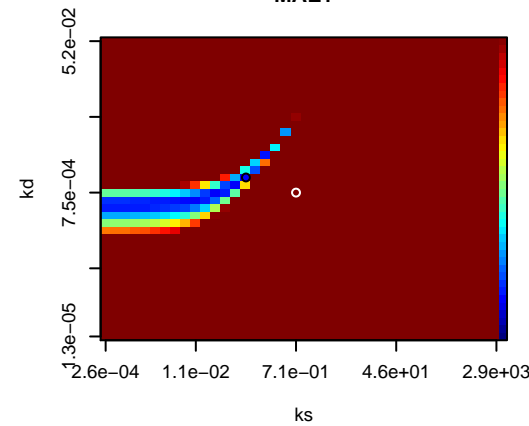

UTP13

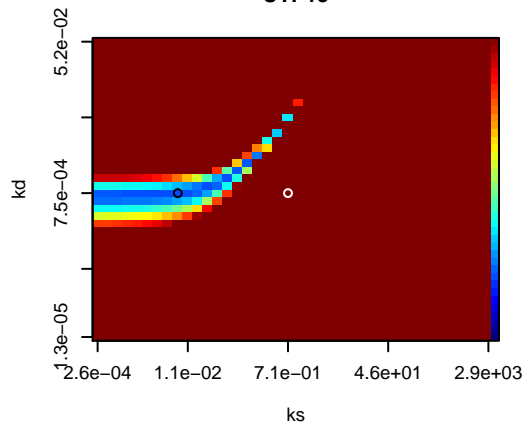

PHO88

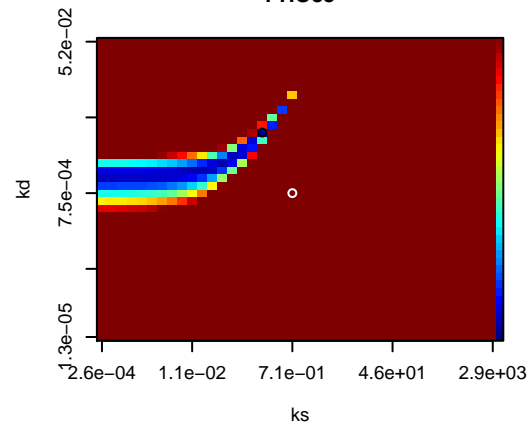

BRX1

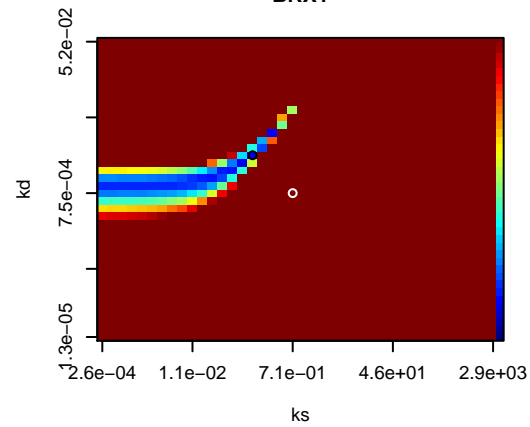

ADE8

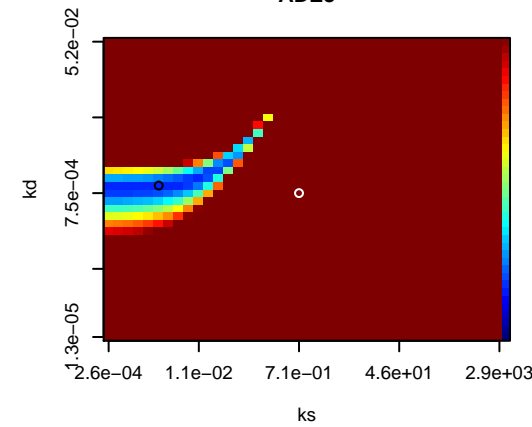

TUB4

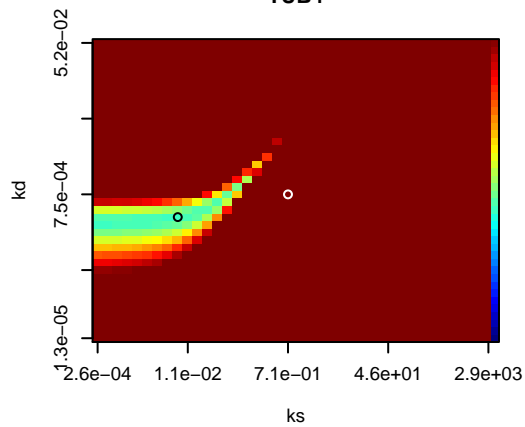

NOP6

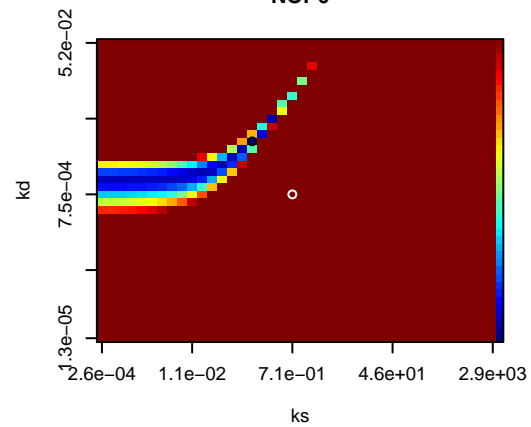

RBG1

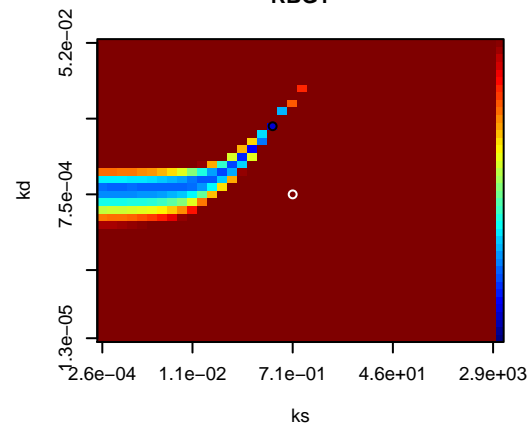

NIP1

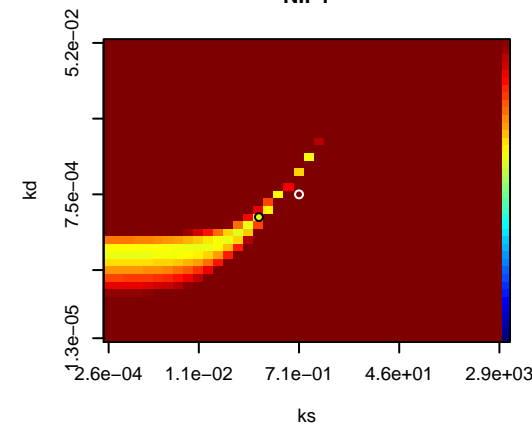

SSE1

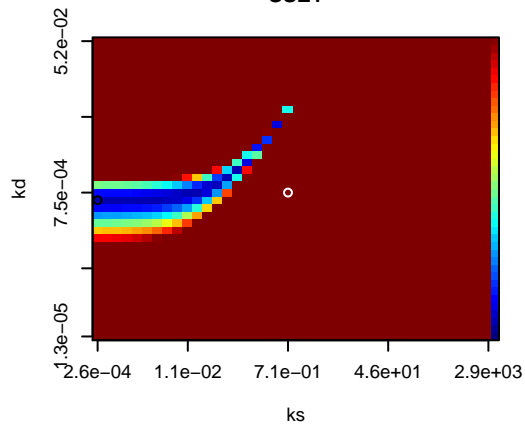

YJR003C

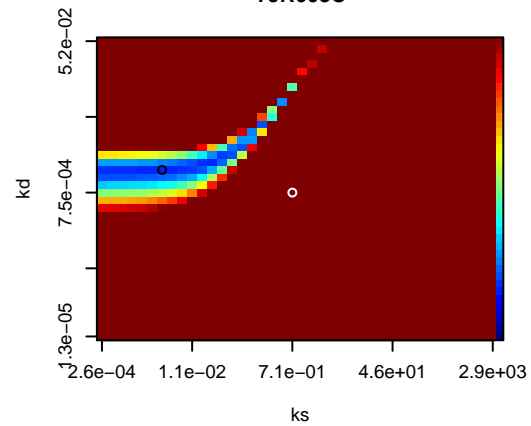

HPT1

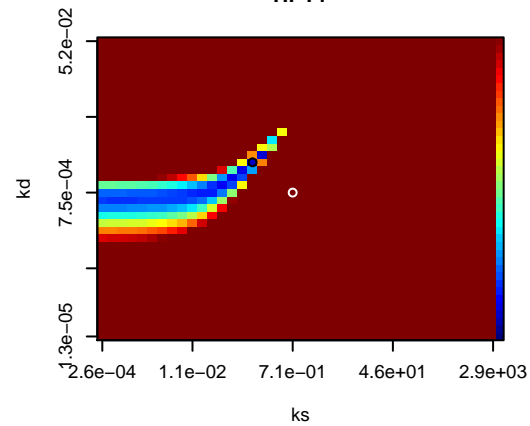

ADE12

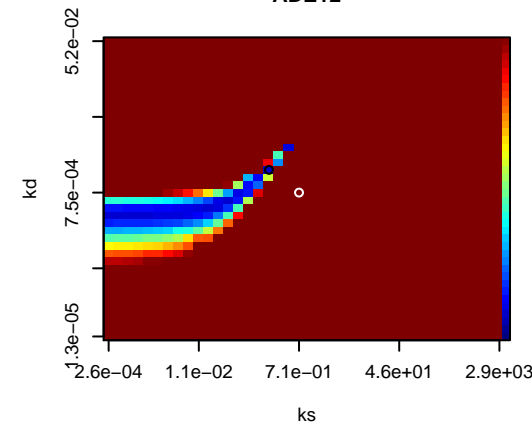

DPH2

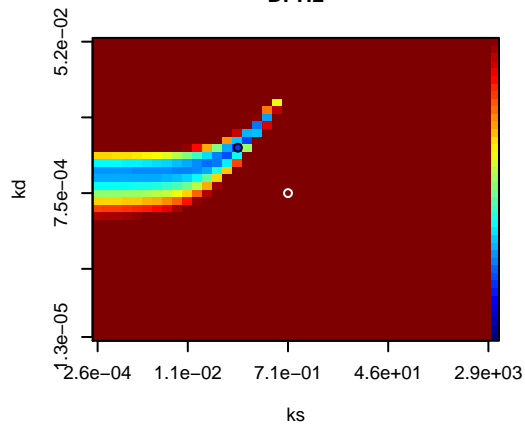

ELP3

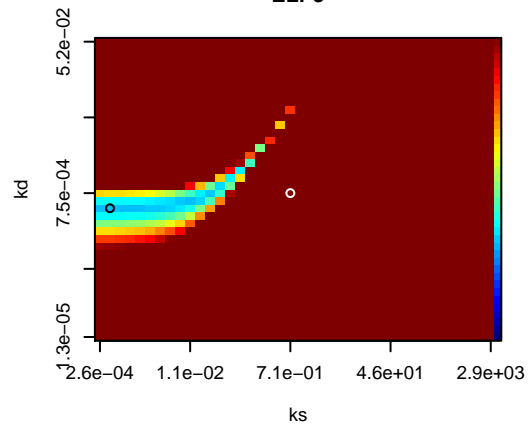

ACC1

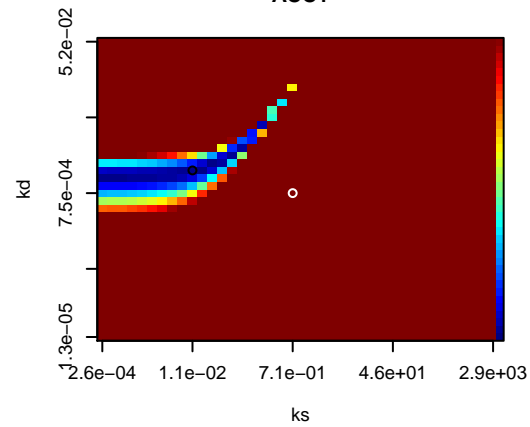

HTS1

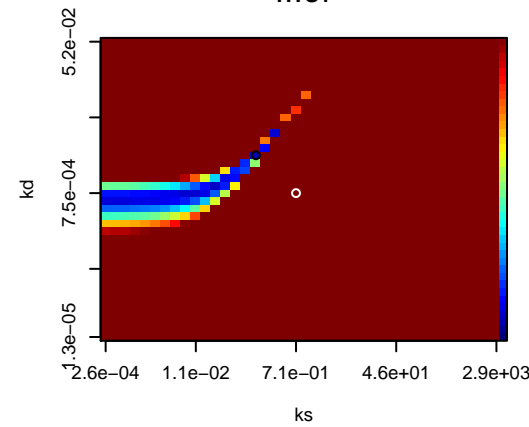

NUG1

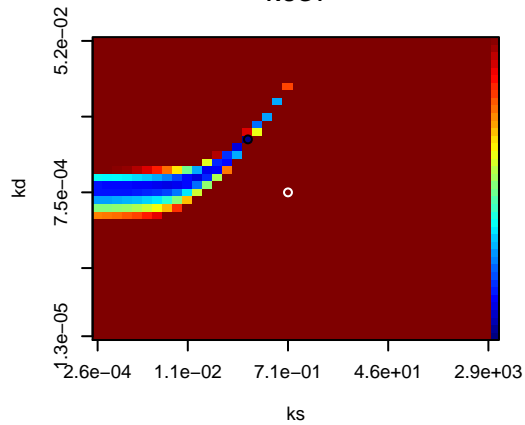

PSE1

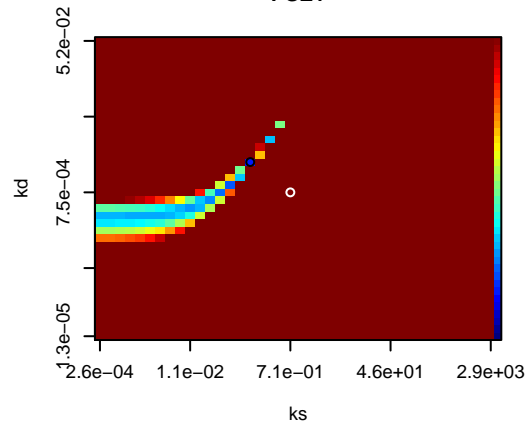

HAM1

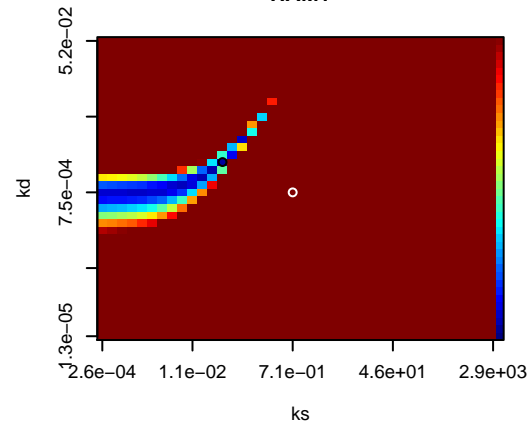

HCR1

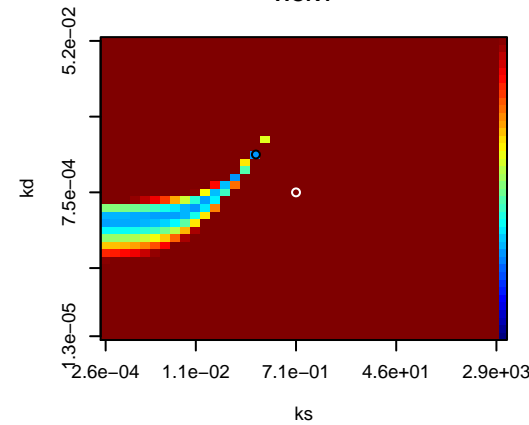

NOP13

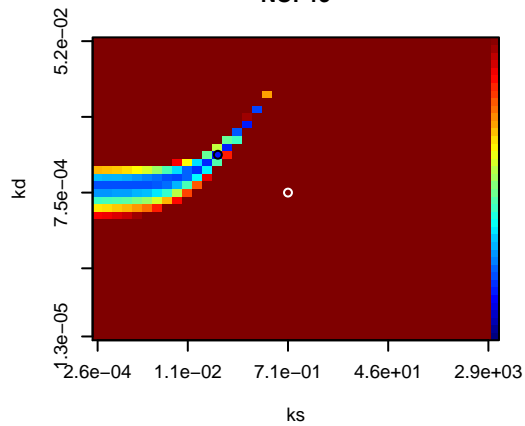

GCD7

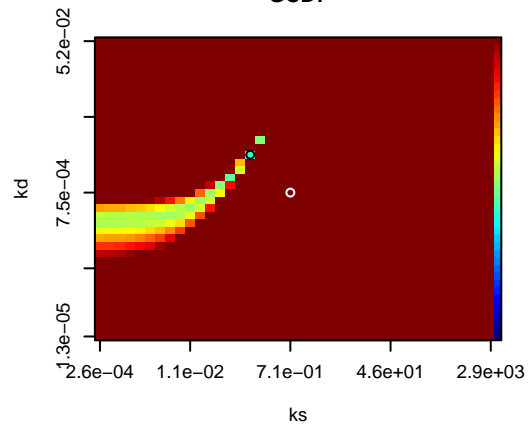

RRP6

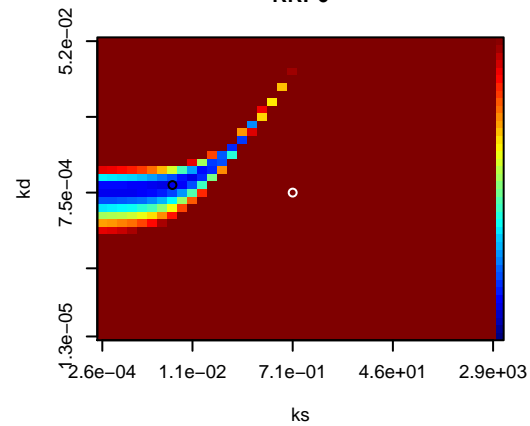

PUS7

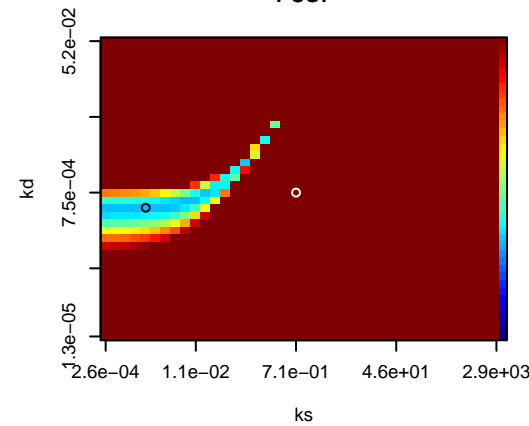

RCL1

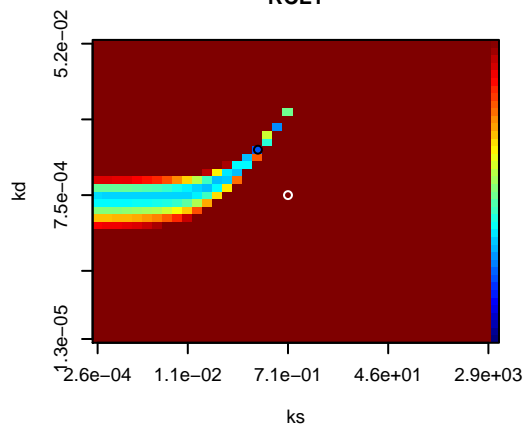

NCL1

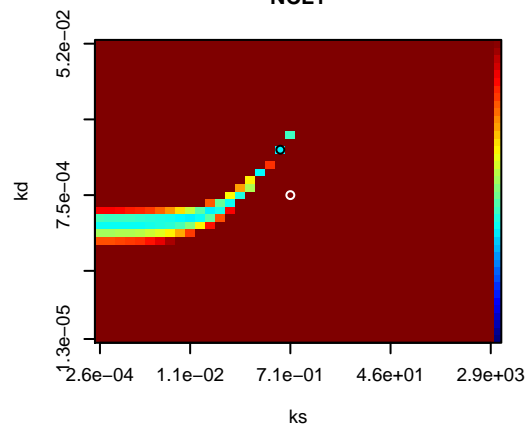

ALA1

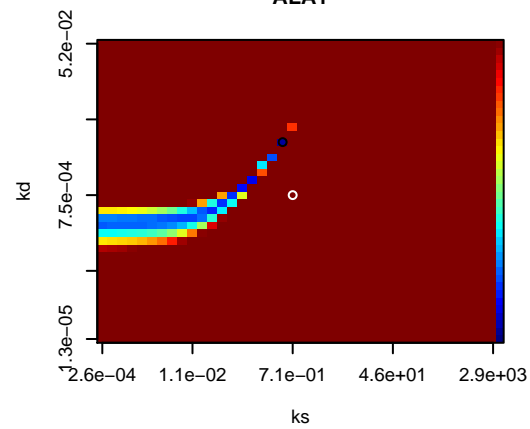

MAP1

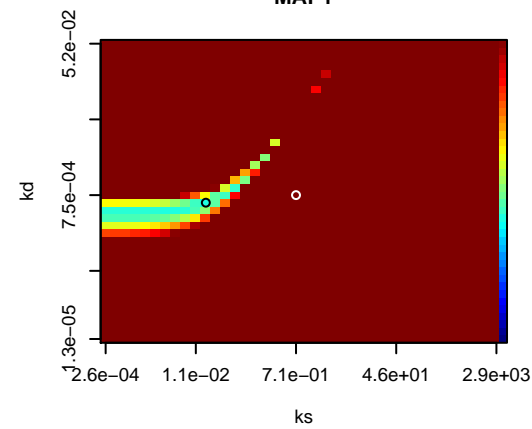

TCB2

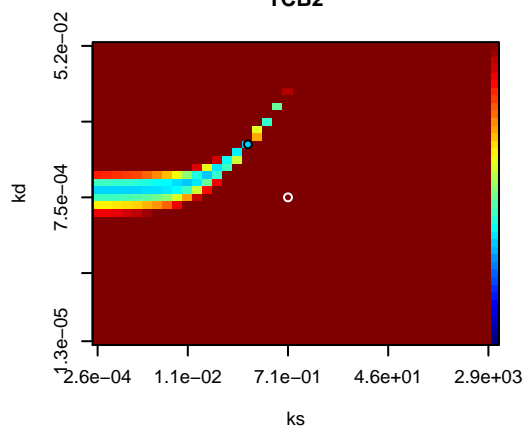

TPA1

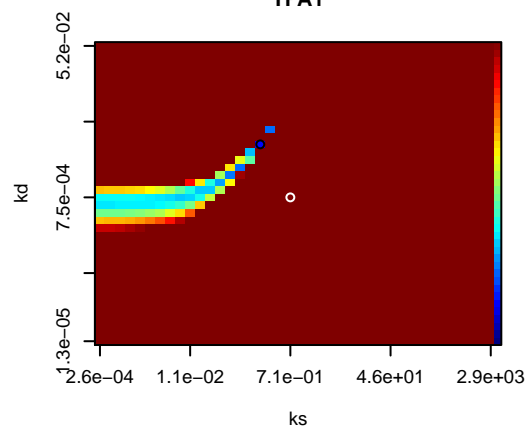

NOP58

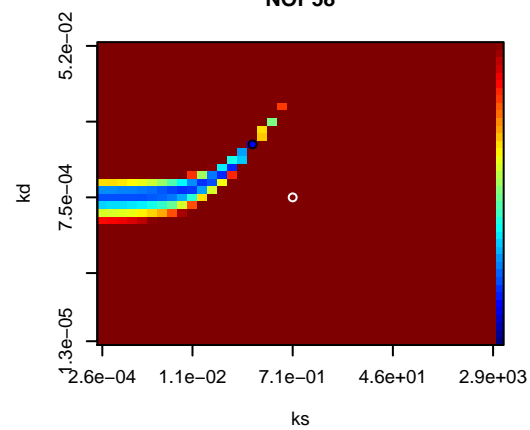

PRS1

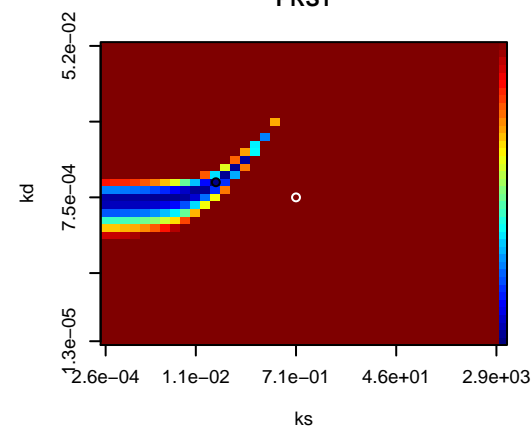

RMT2

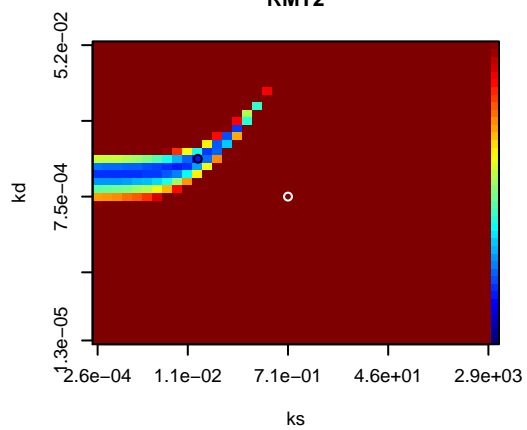

Supplement: c4mb00358f2.zip [file c4mb00358f2.zip]
