# Supplementary material for: One third of dynamic protein expression profiles can be predicted by a simple rate equation
Source: Royal Society of Chemistry journal article supplement (doi:10.1039/c4mb00358f), 2014-08-01

MAE1

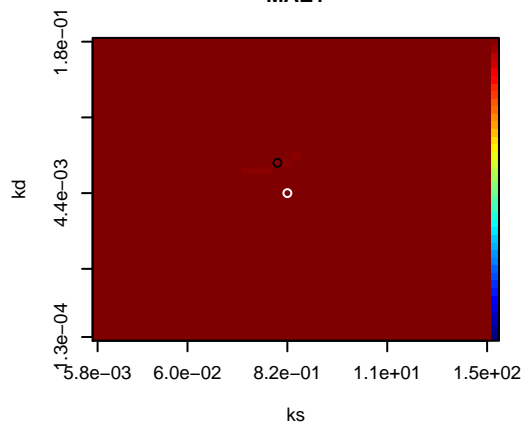

FUM1

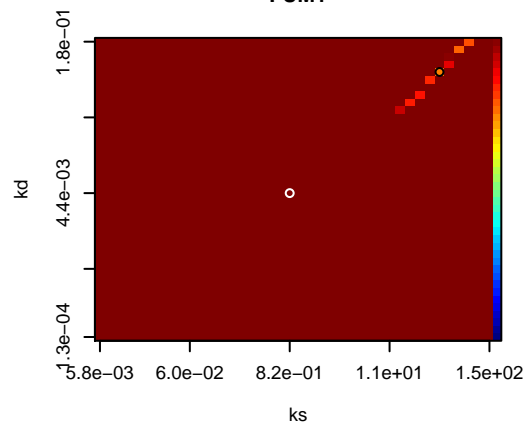

ERG20

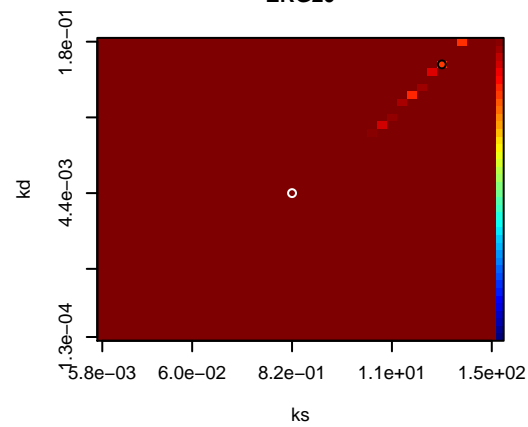

RAD23

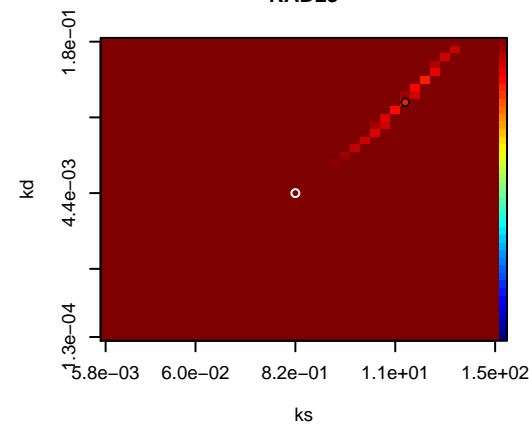

VMA1

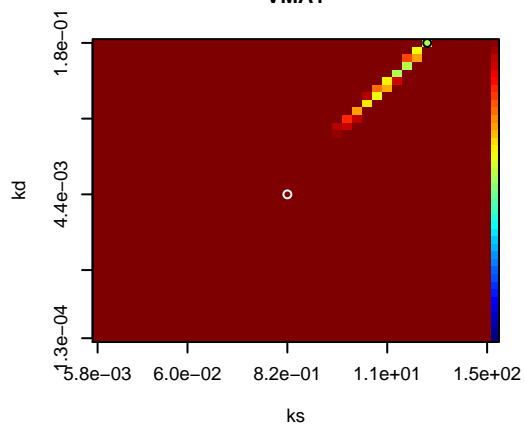

AAT2

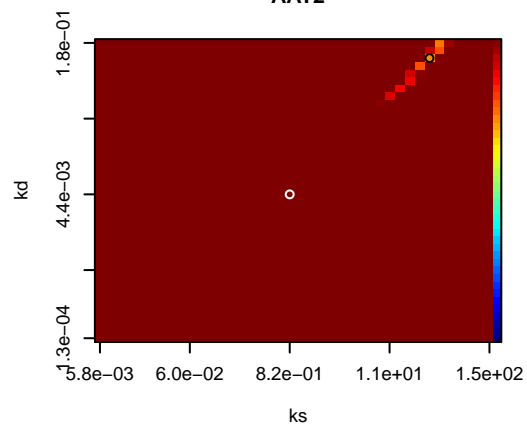

HRI1

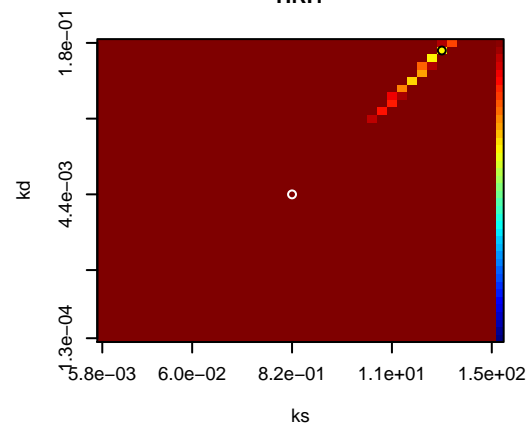

PTC2

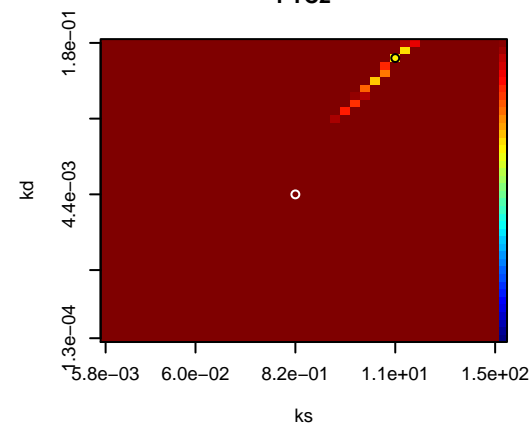

BAR1

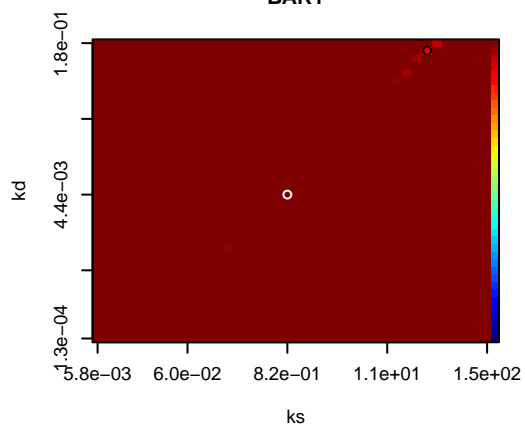

SHM1

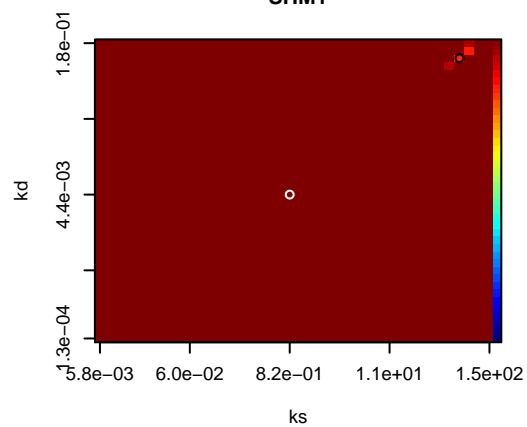

PIN2

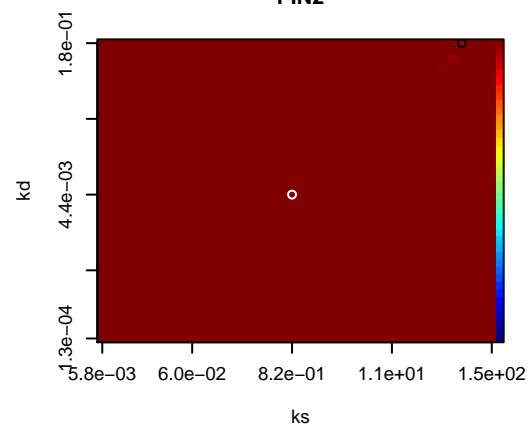

IDI1

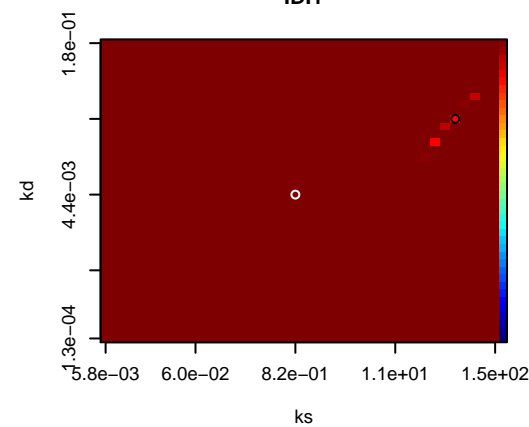

**RPS19B**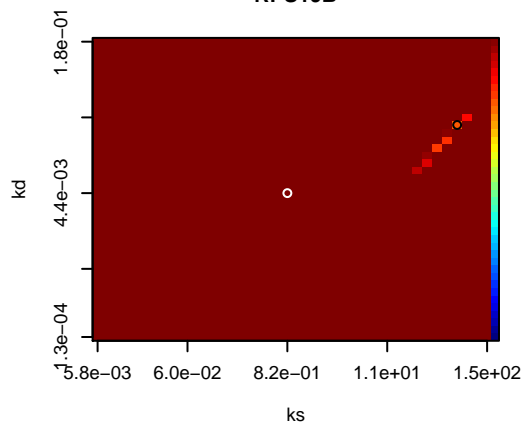**RPL19B**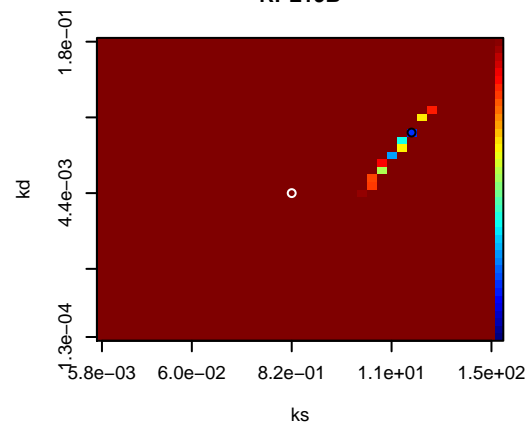**BUR6**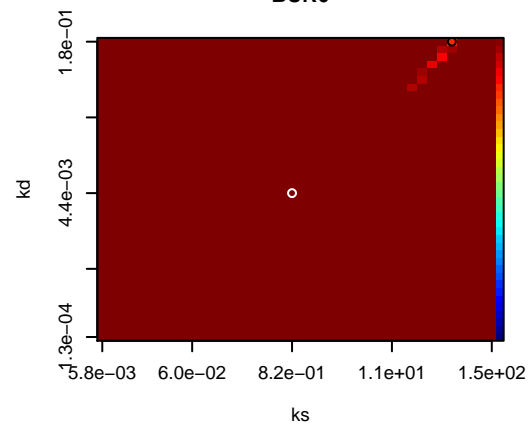**GPM1**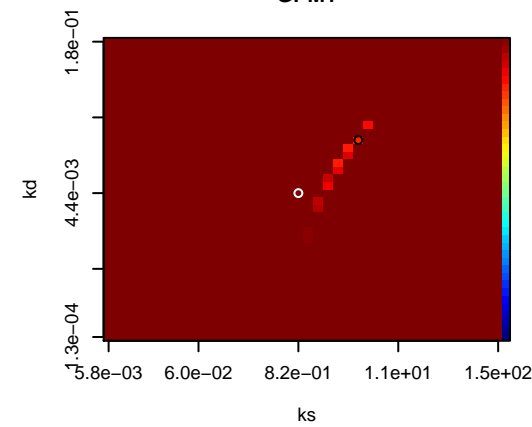**SIS1**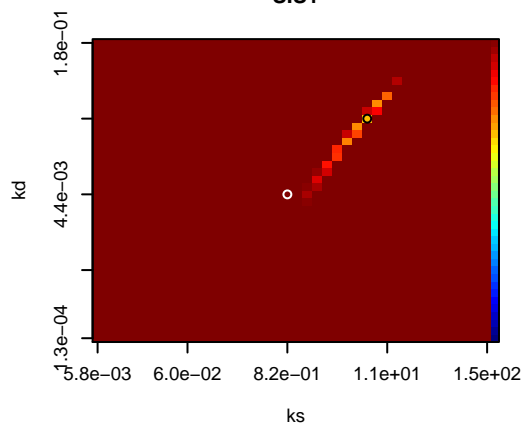**EGD2**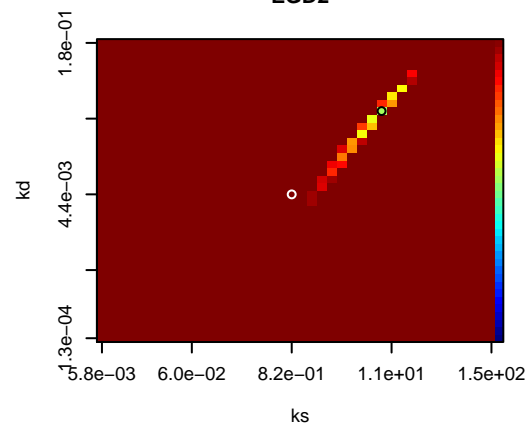**MDN1**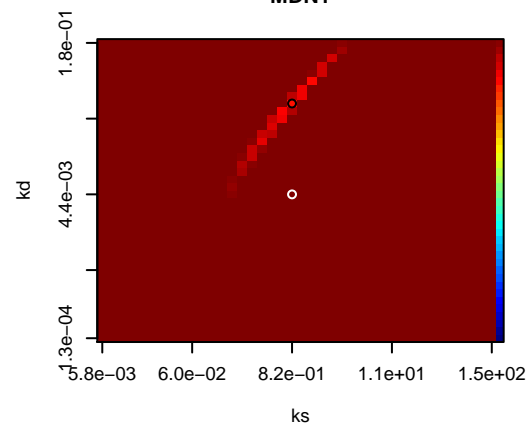**DAP1**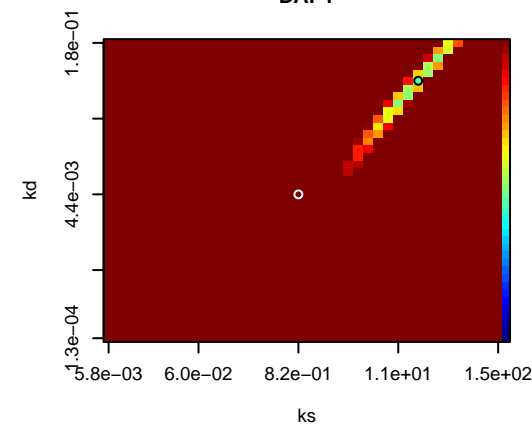**PRE10**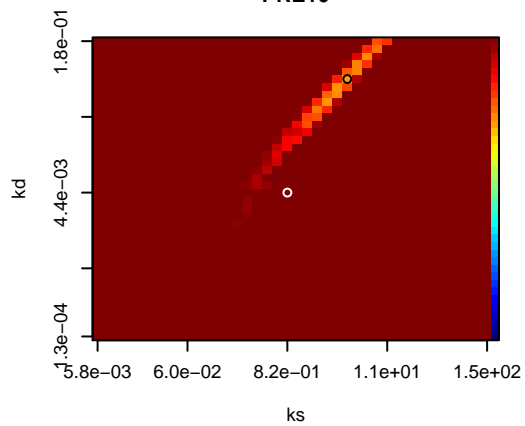**CKS1**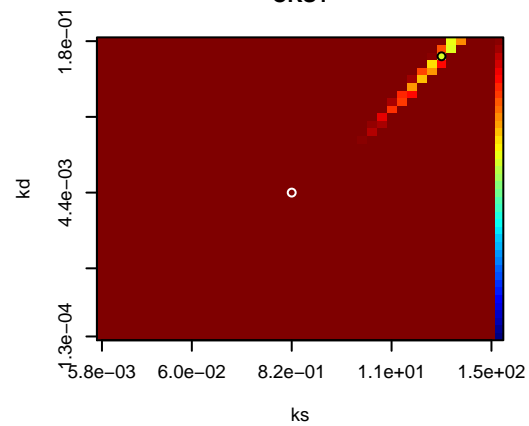**TRA1**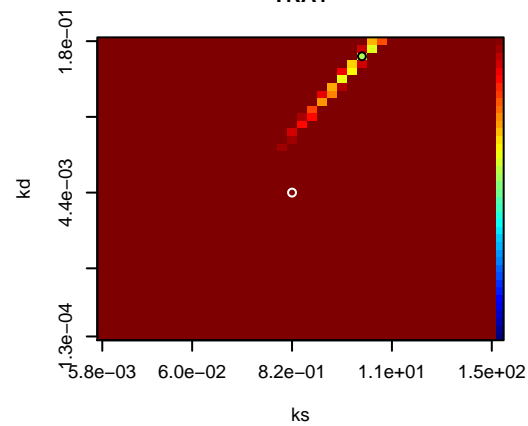**FPR2**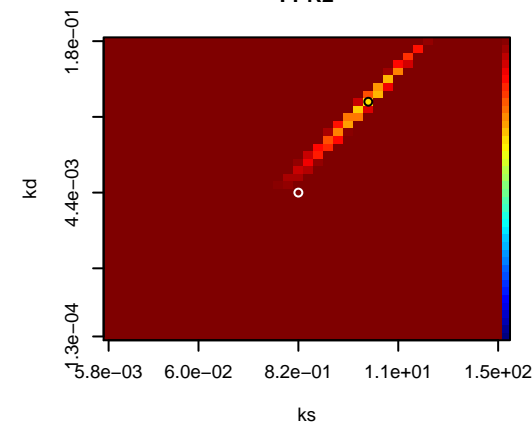

BNA5

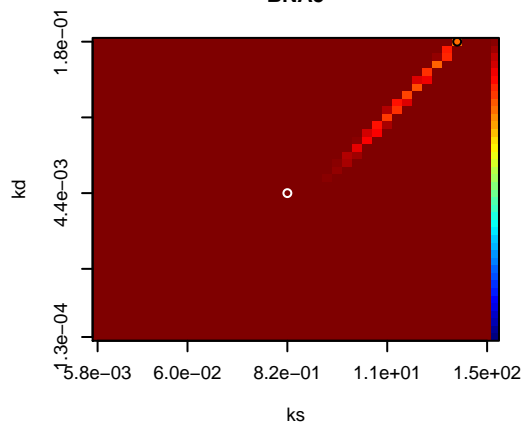

TDH1

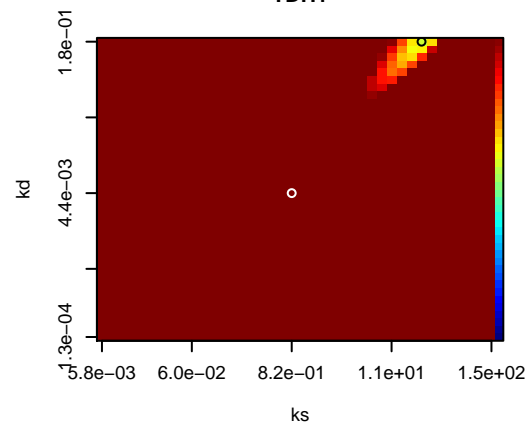

PIL1

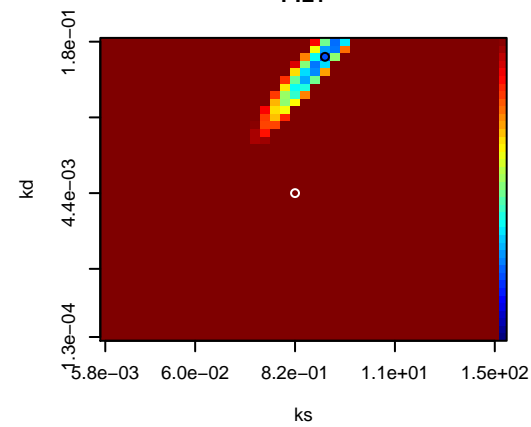

HEM13

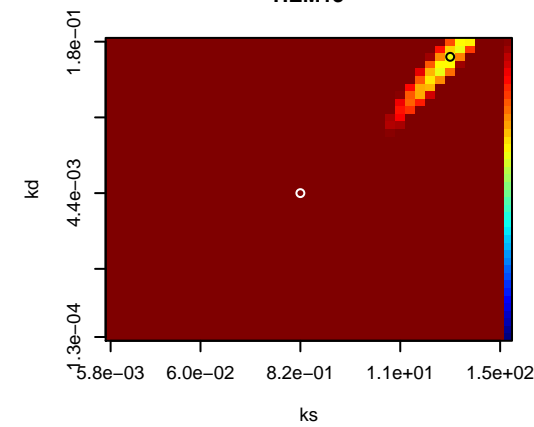

MEU1

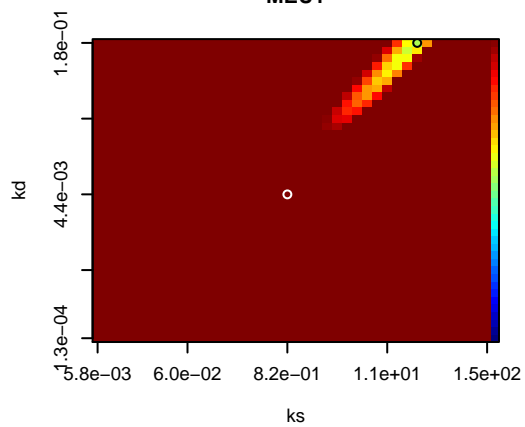

PRE4

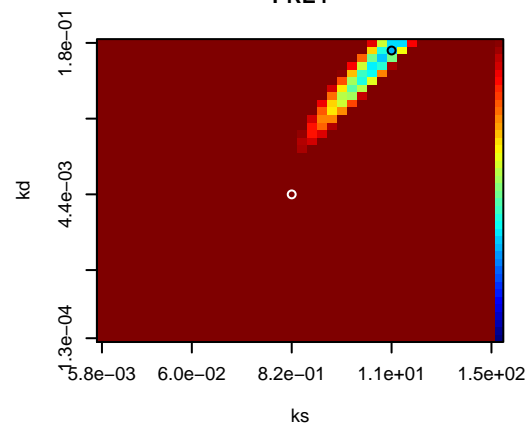

RPL17B

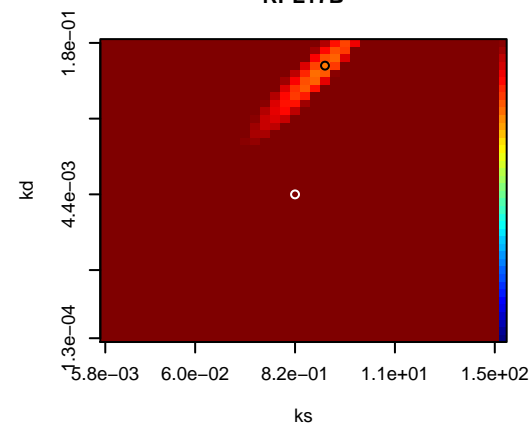

FMP27

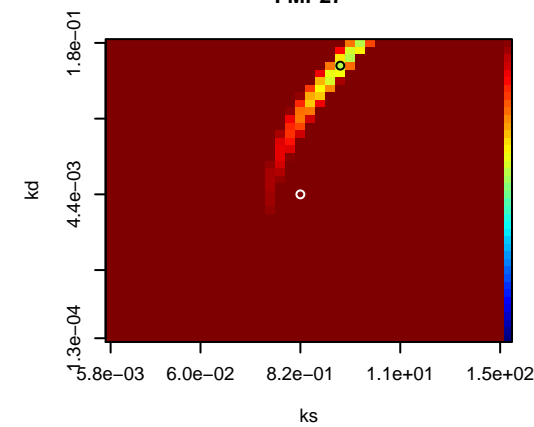

COX4

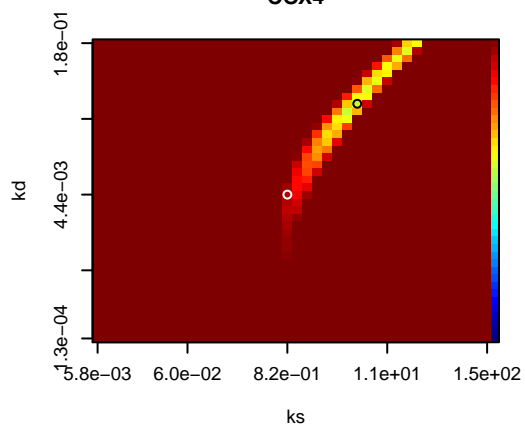

RPN12

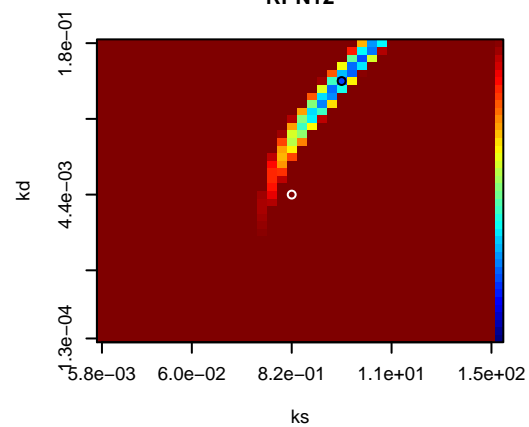

GSH2

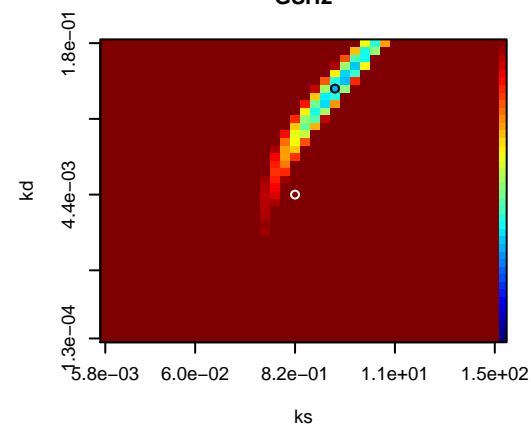

SDC1

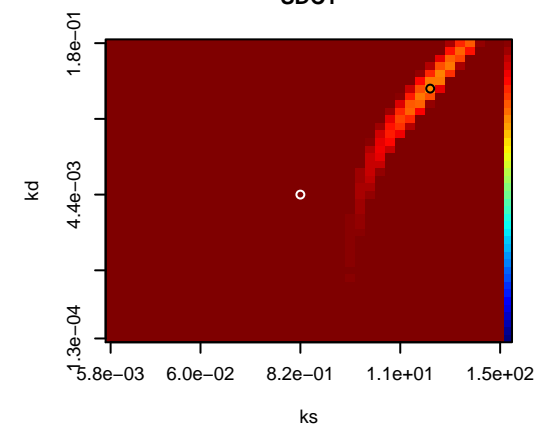

PFK1

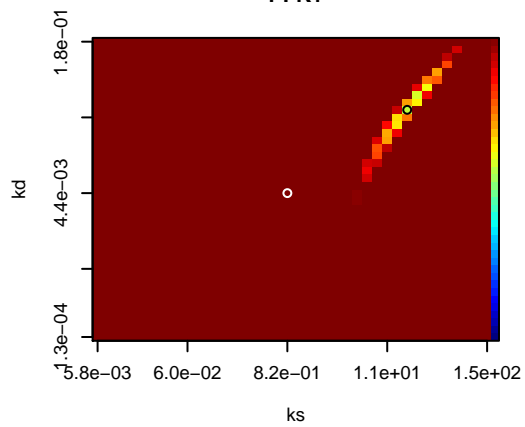

CSF1

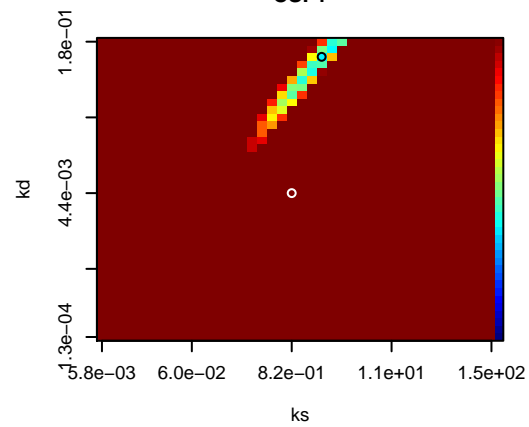

ECM32

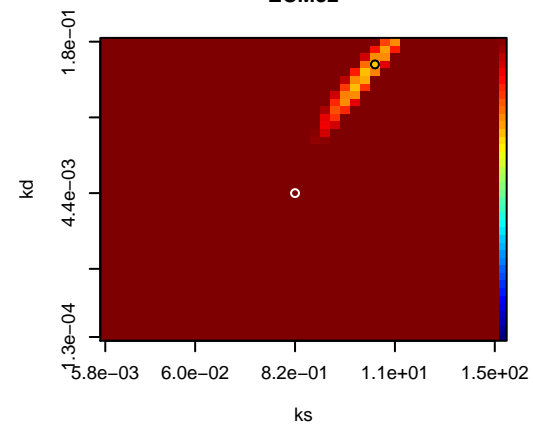

NUP170

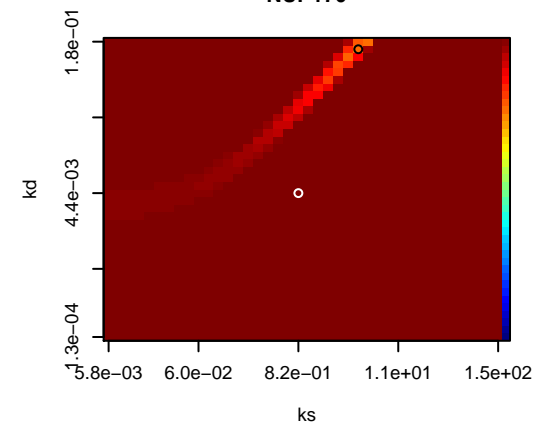

ARG5-6

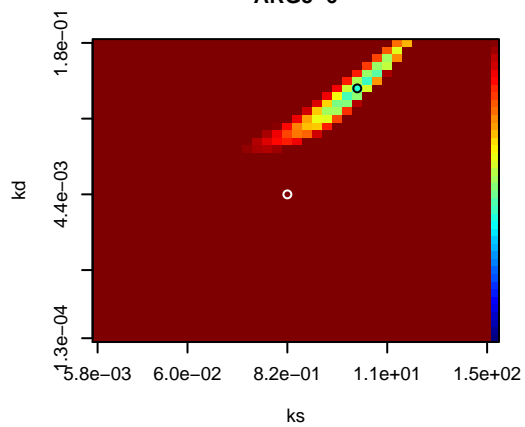

GCV2

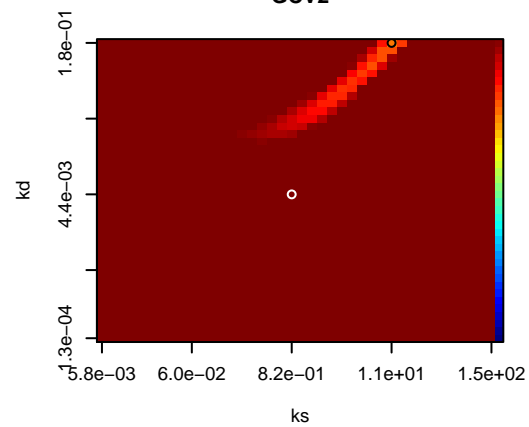

APE3

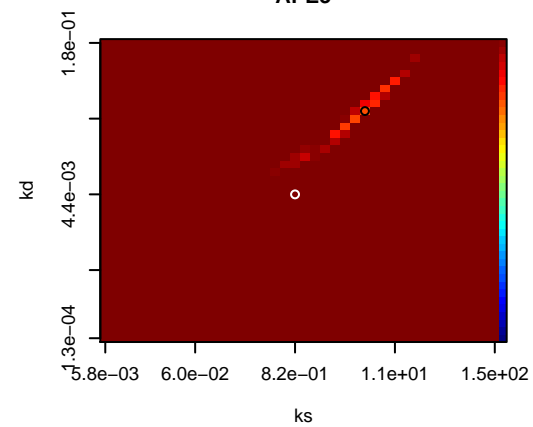

YCR051W

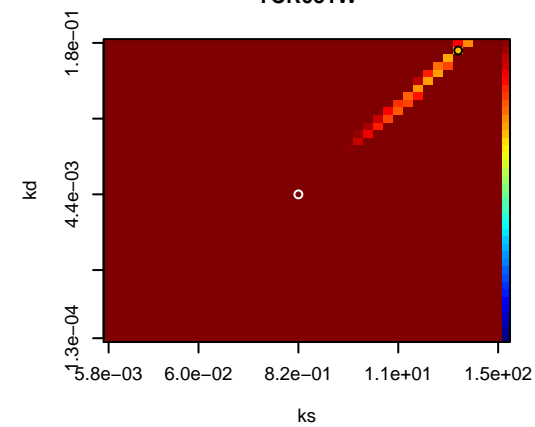

REE1

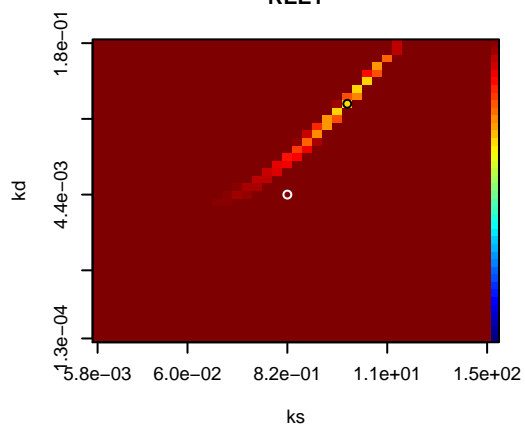

FRS2

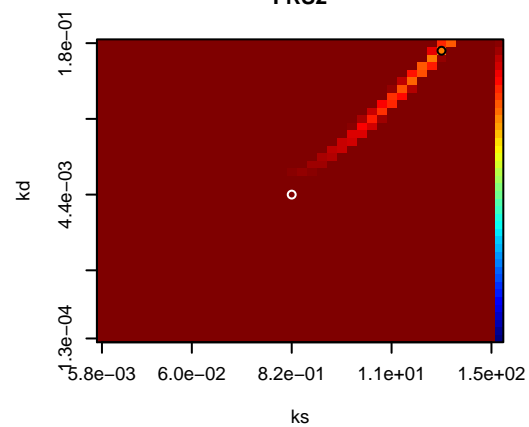

GON7

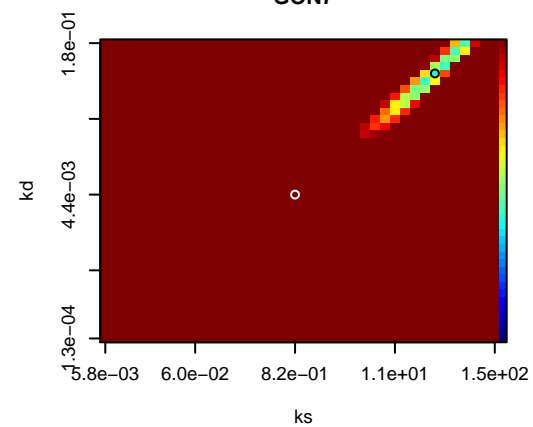

PUS1

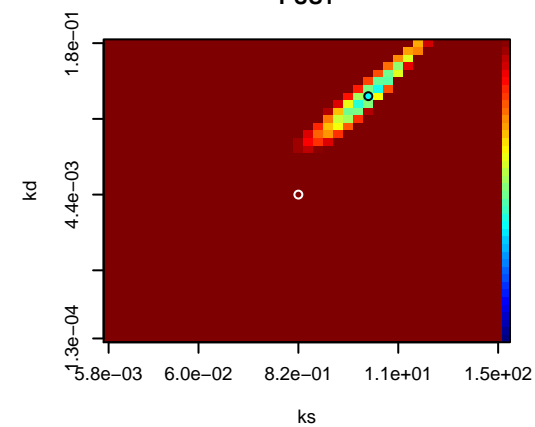

RPA12

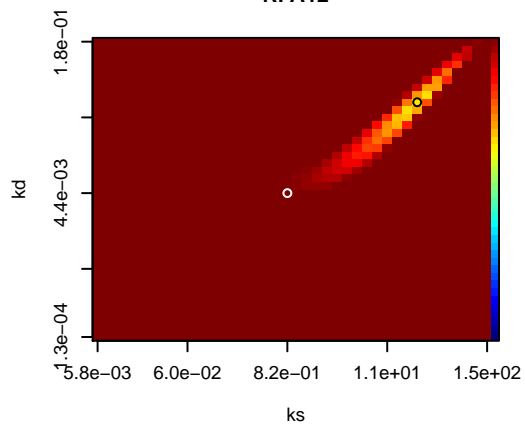

ARG4

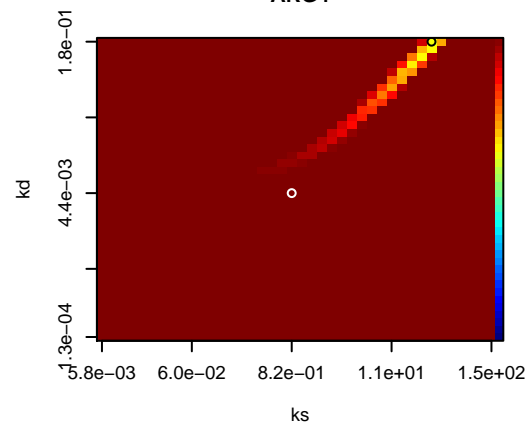

HNT1

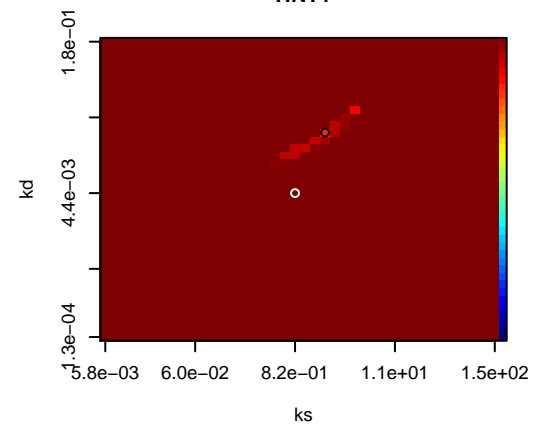

IML1

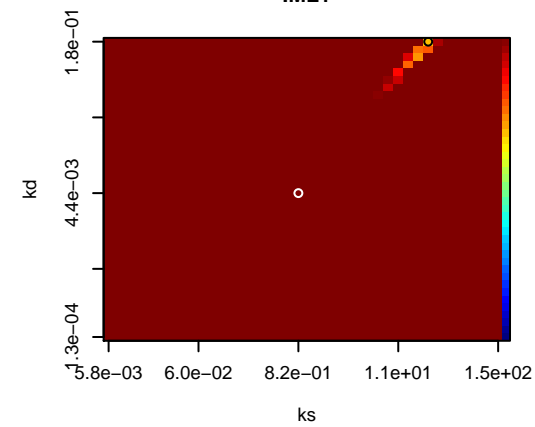

PAN1

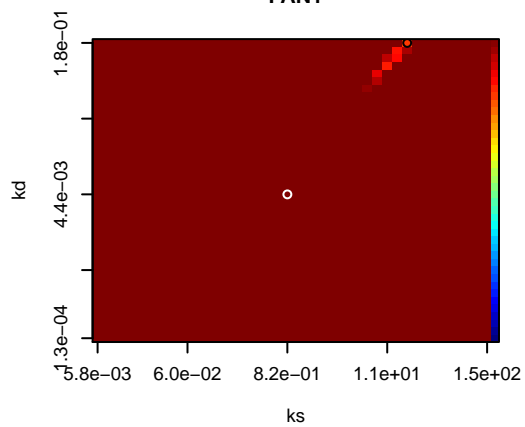

PYC2

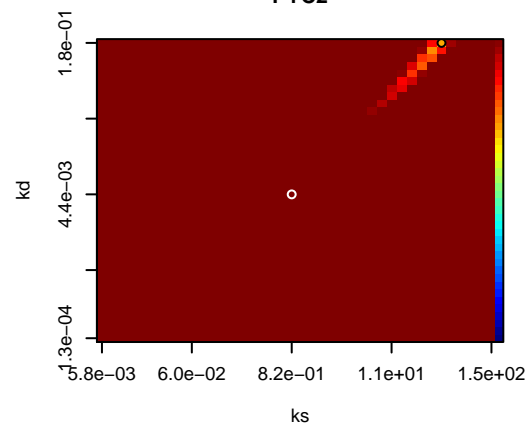

SPP41

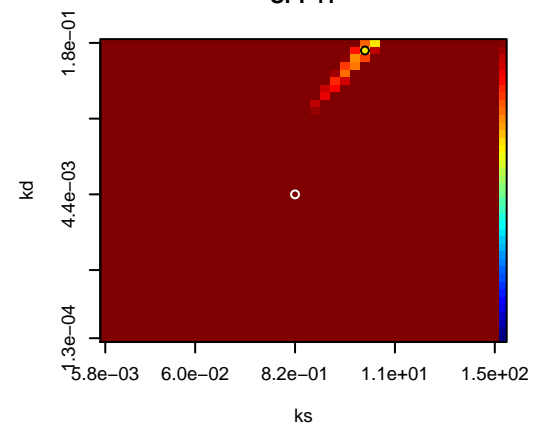

NIT3

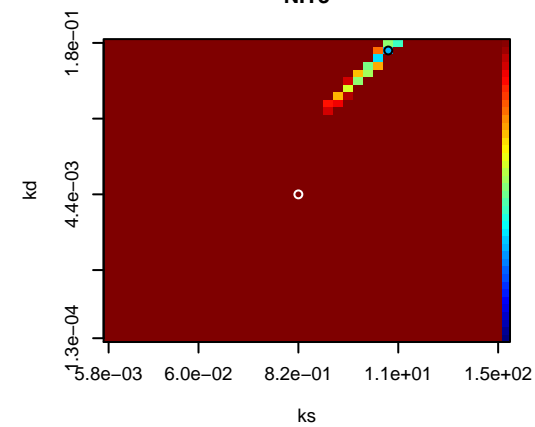

SCC2

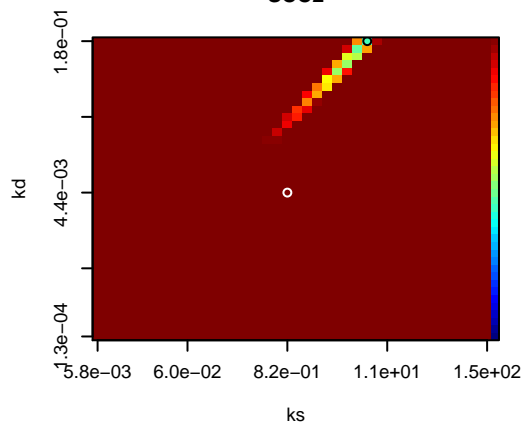

ERG13

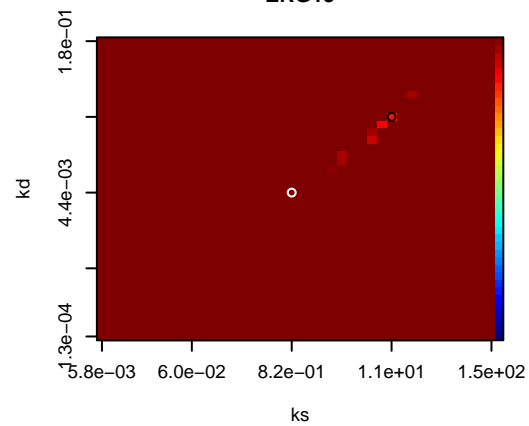

TRM82

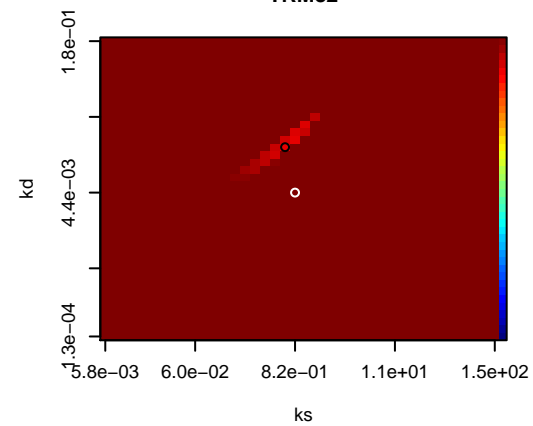

Supplement: c4mb00358f2.zip [file c4mb00358f2.zip]
