# Supplementary material for: One third of dynamic protein expression profiles can be predicted by a simple rate equation
Source: Royal Society of Chemistry journal article supplement (doi:10.1039/c4mb00358f), 2014-08-01

**HRR25**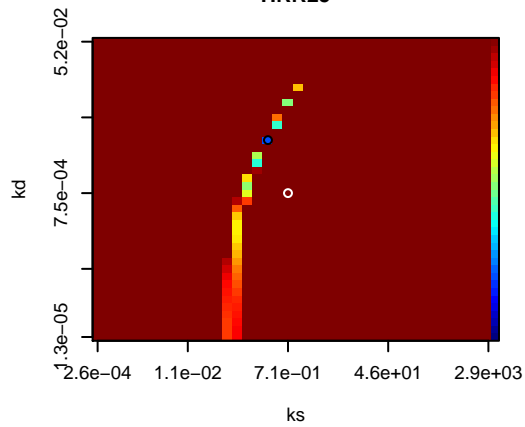**YGL101W**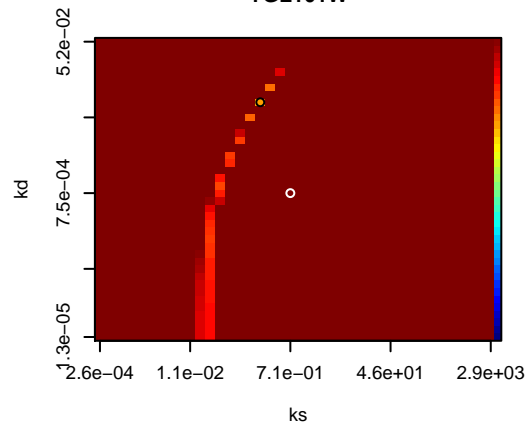**SYH1**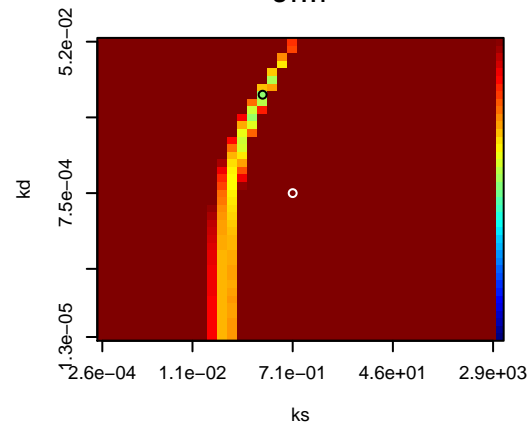**STH1**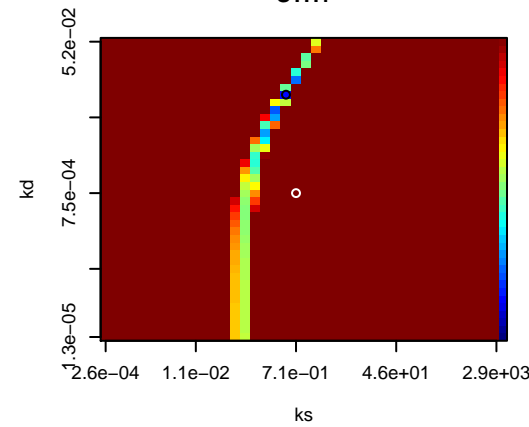**LCP5**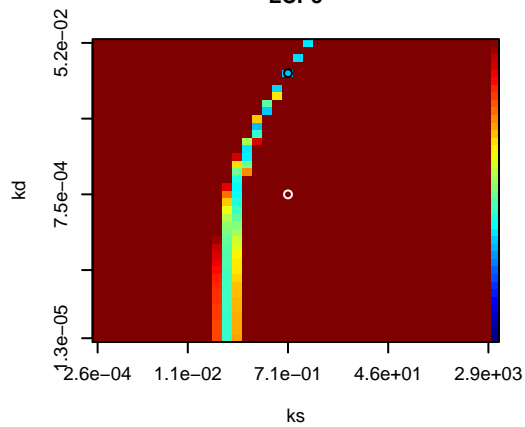**MRH1**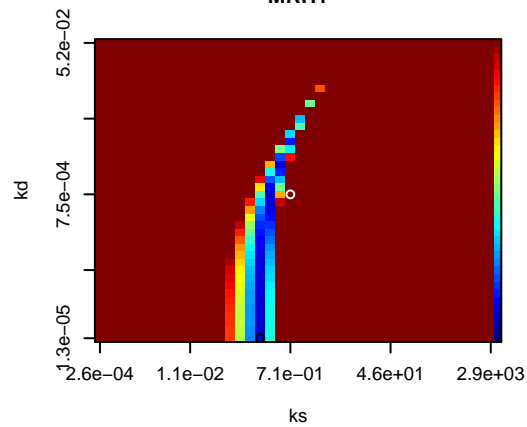**ACO1**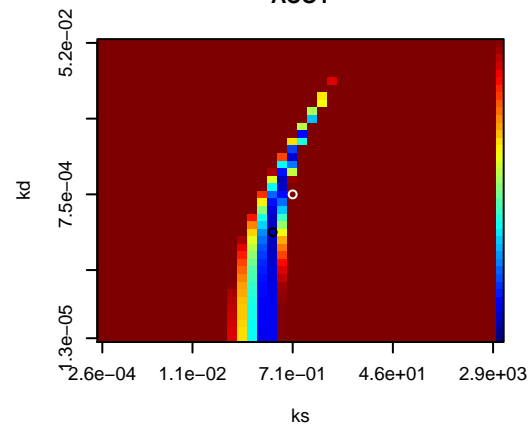**HIS7**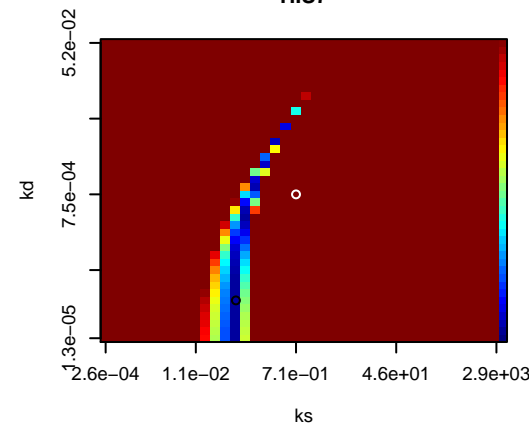**MCX1**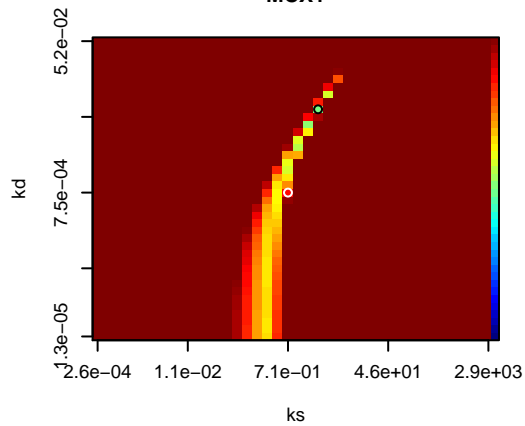**POL1**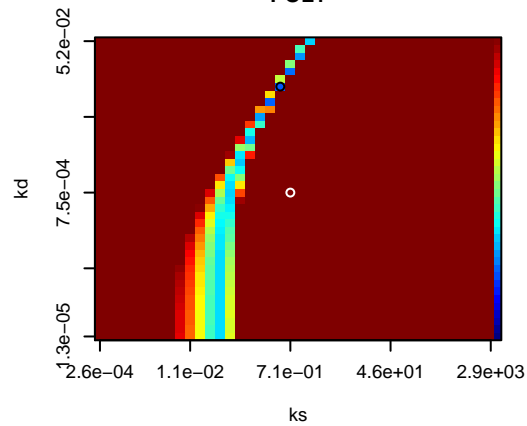**STE12**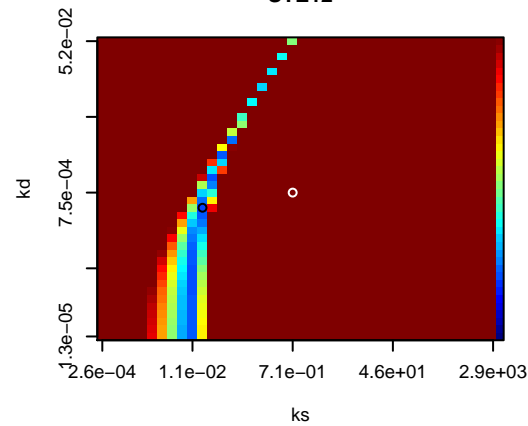**SMC1**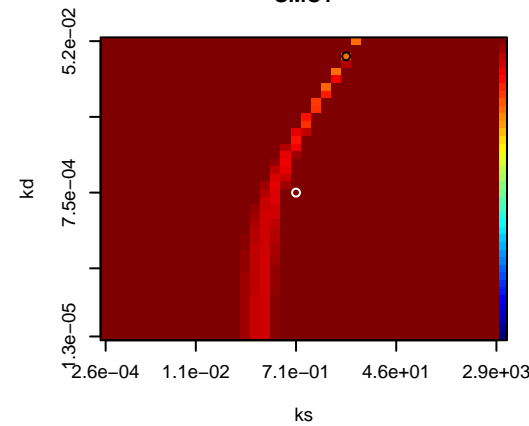

NNT1

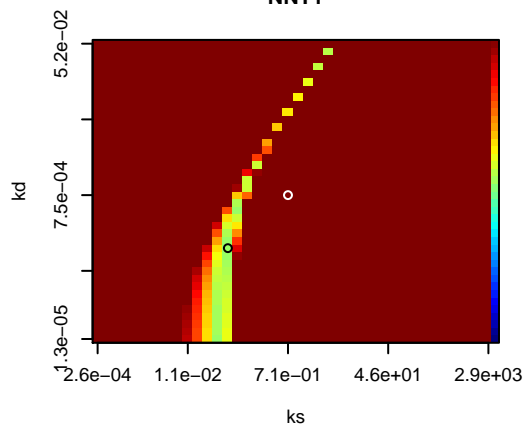

LSM12

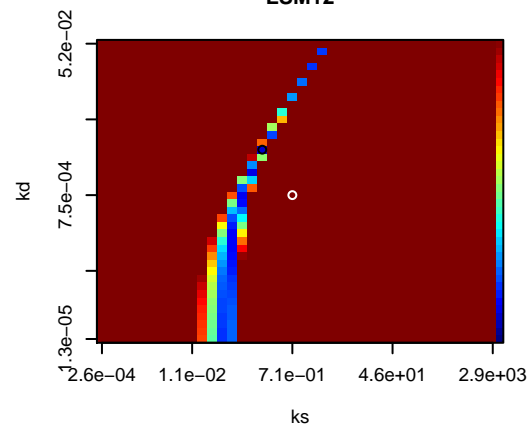

URA2

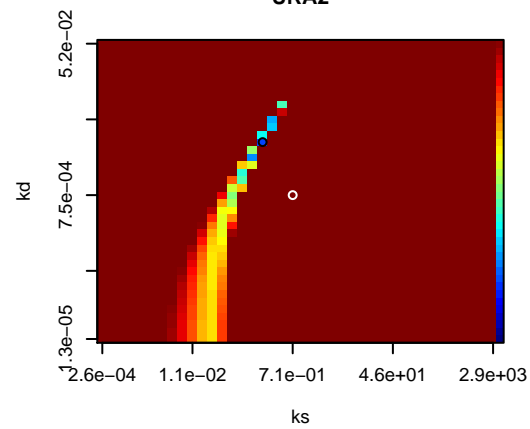

CDC60

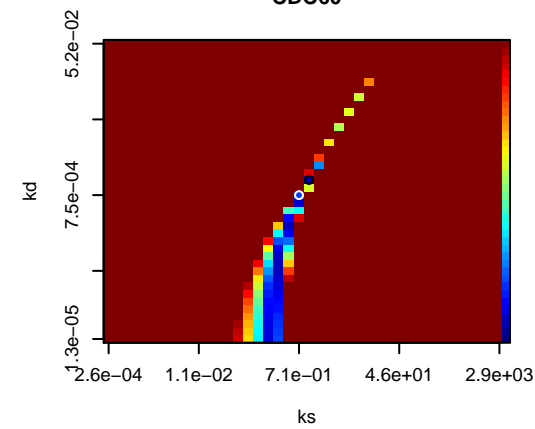

GLT1

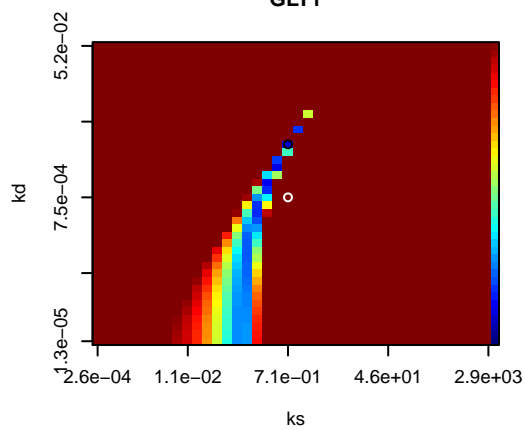

CWH41

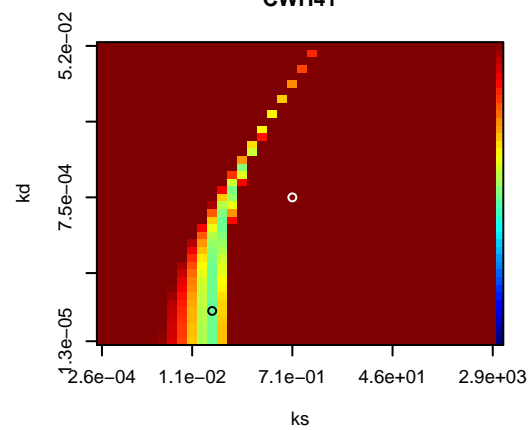

YGR210C

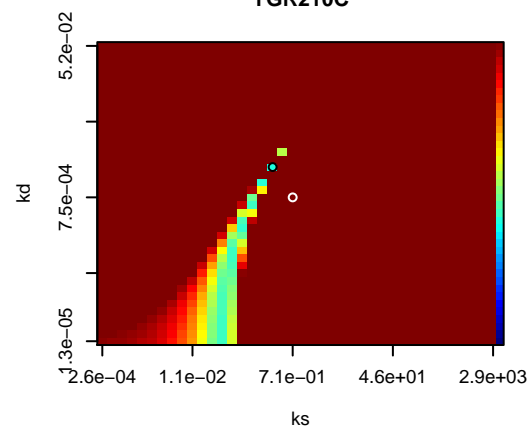

LAC1

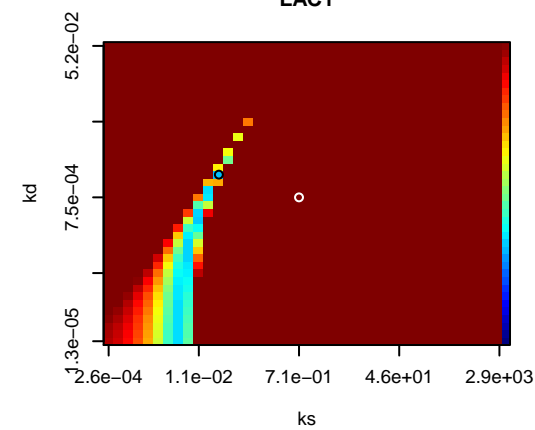

CCR4

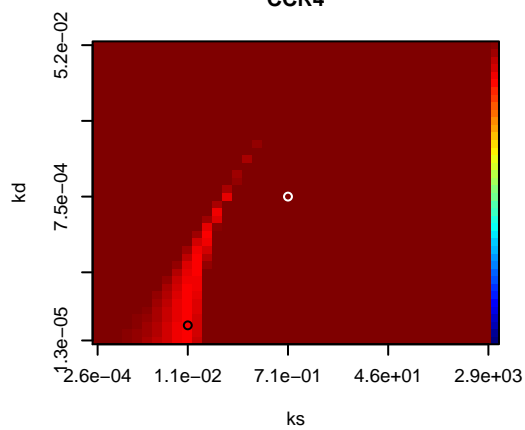

LSM4

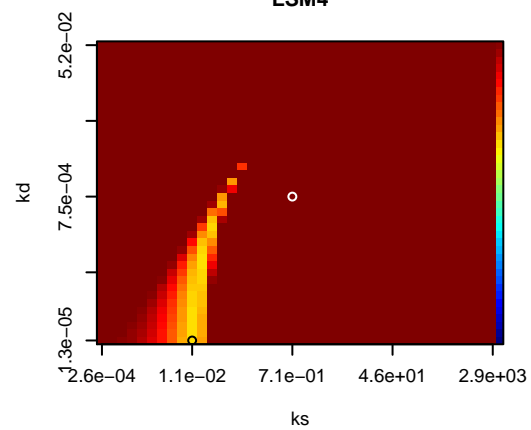

TYS1

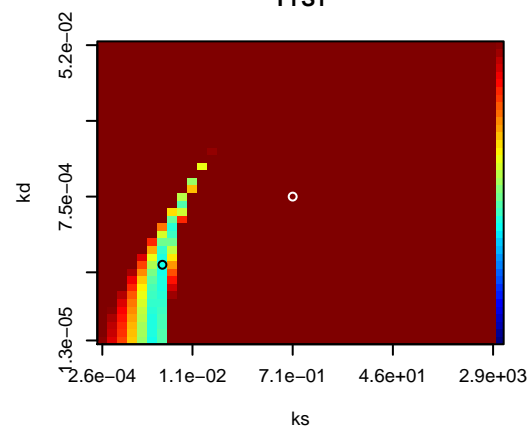

TYW1

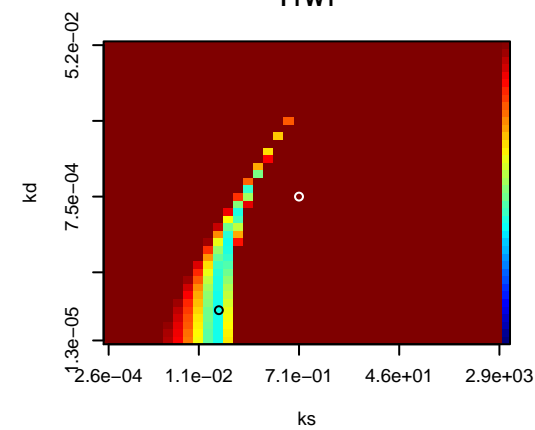

RHO3

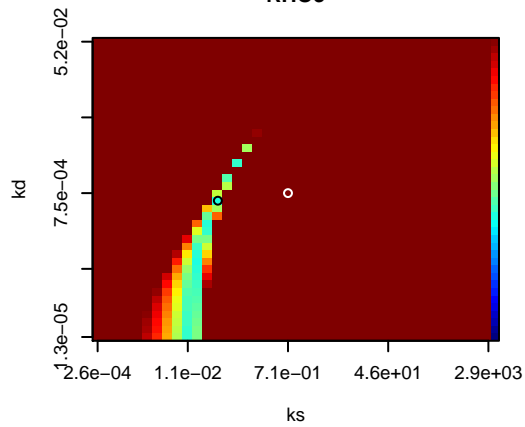

DUR1-2

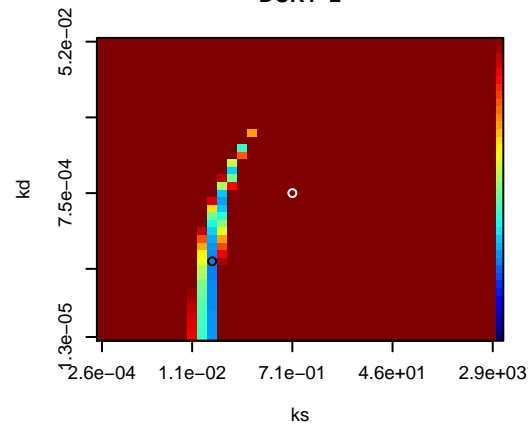

PDB1

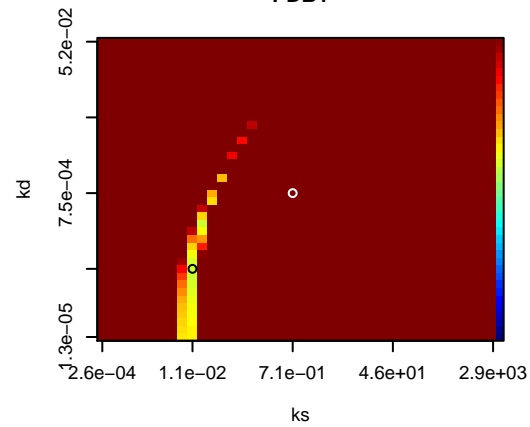

DUS3

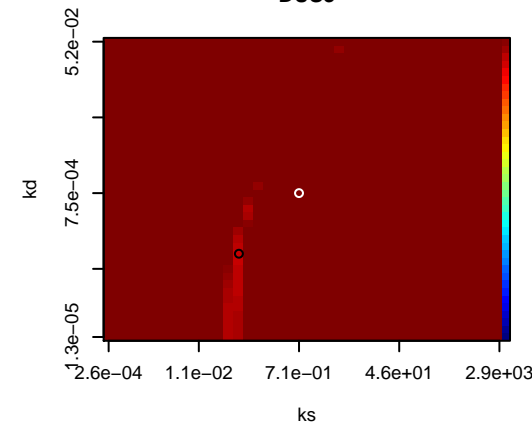

MDH3

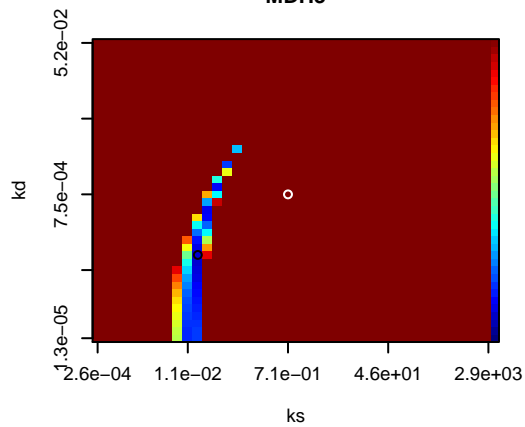

THG1

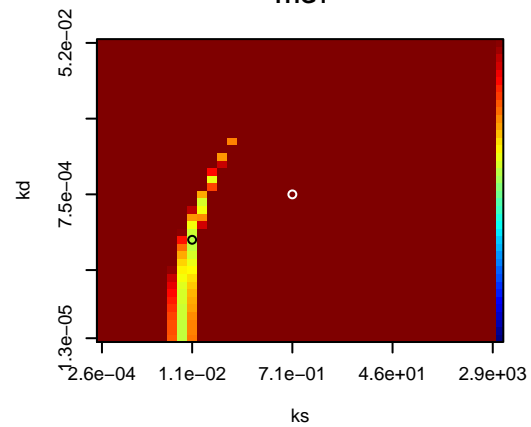

AIM45

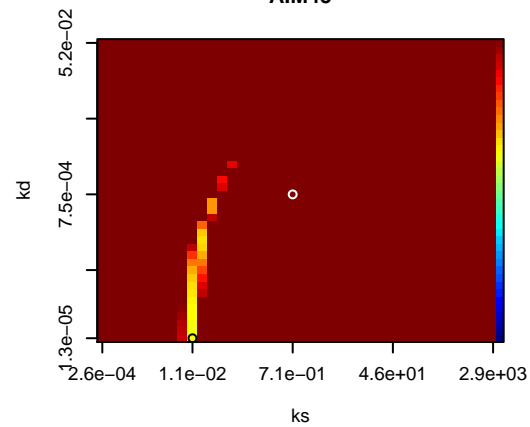

PMT2

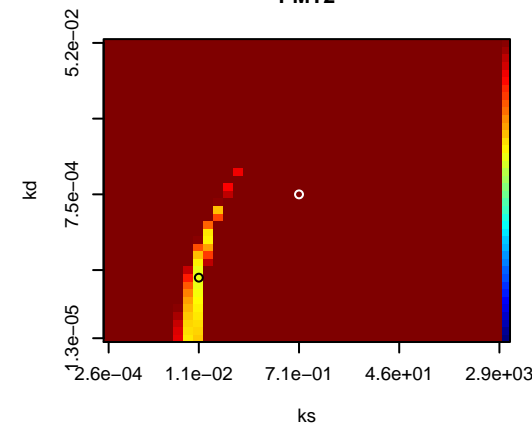

MDM38

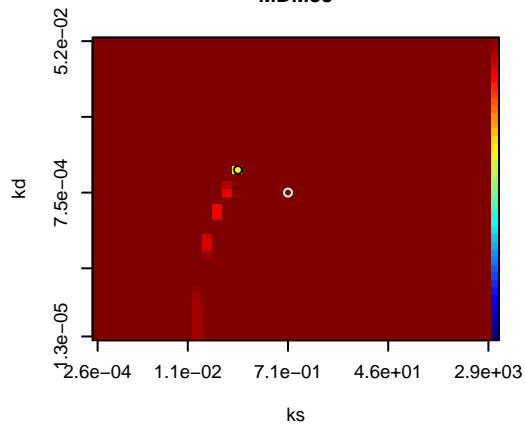

TIF4632

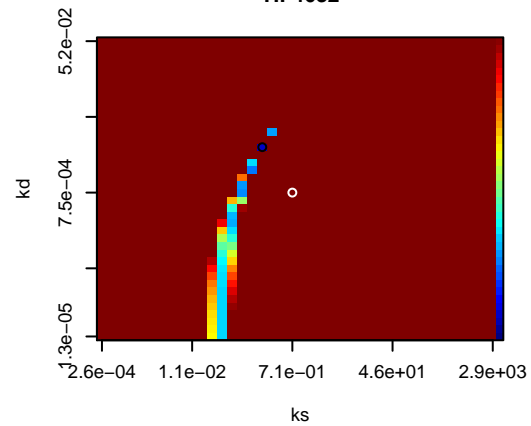

SEC66

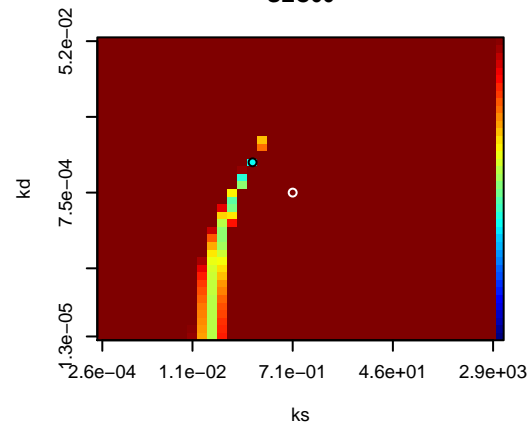

ADH6

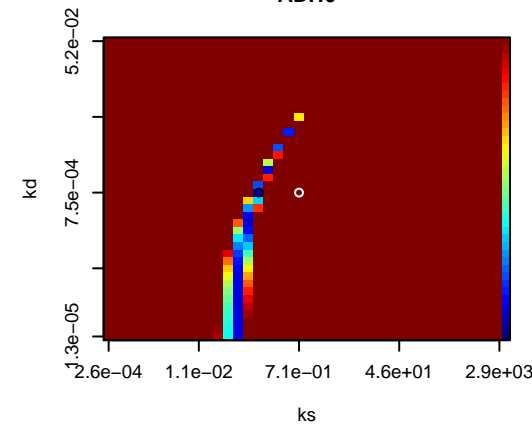

SRP21

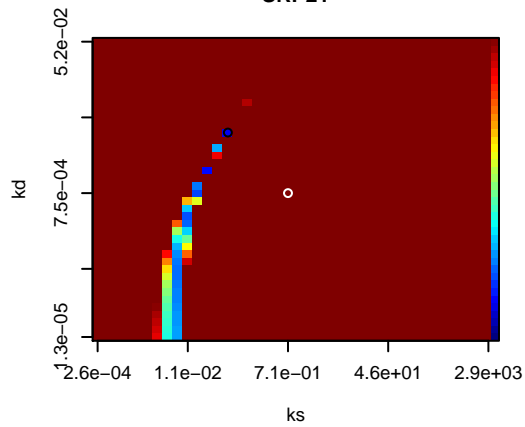

AGE2

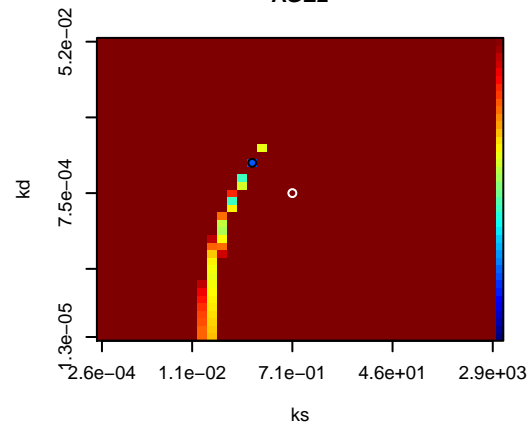

ASF1

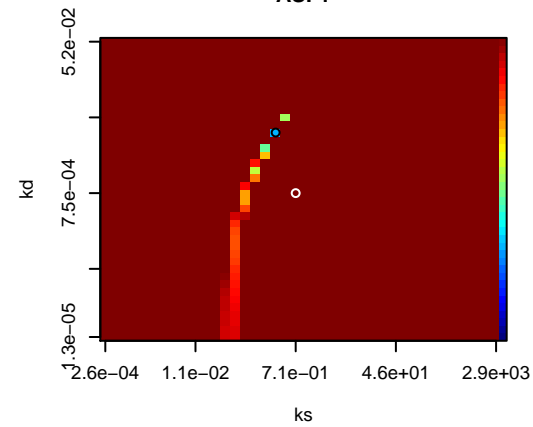

GGA2

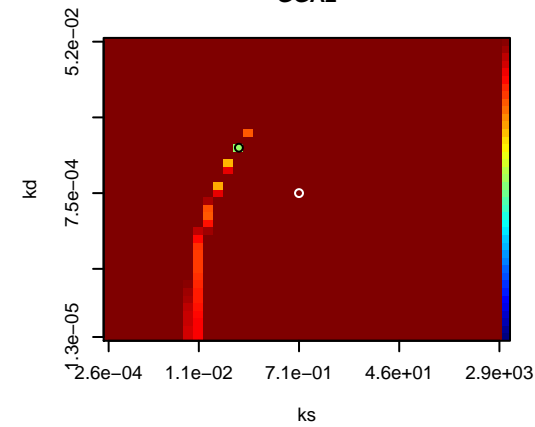

SVL3

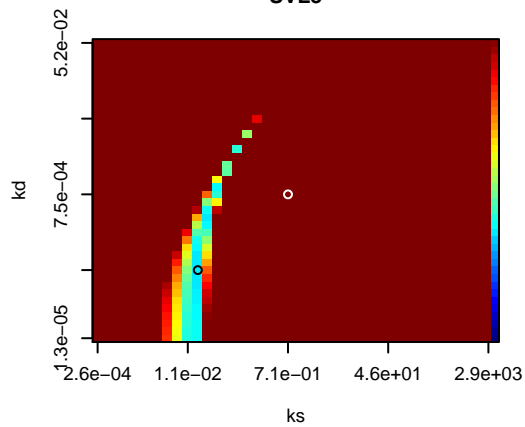

TOM70

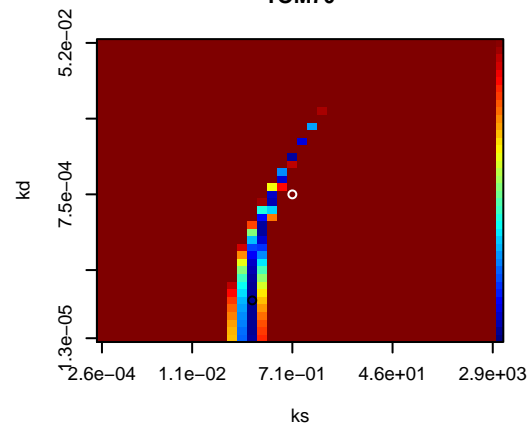

ACP1

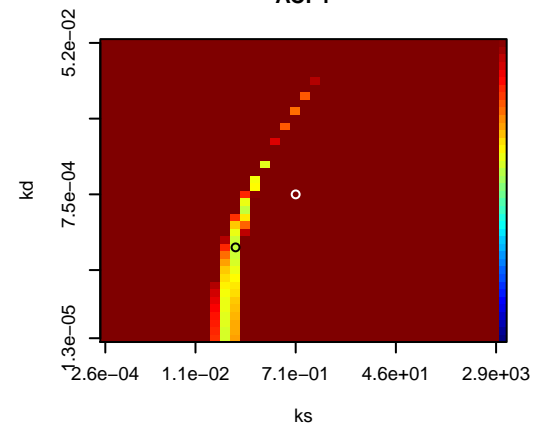

TOS1

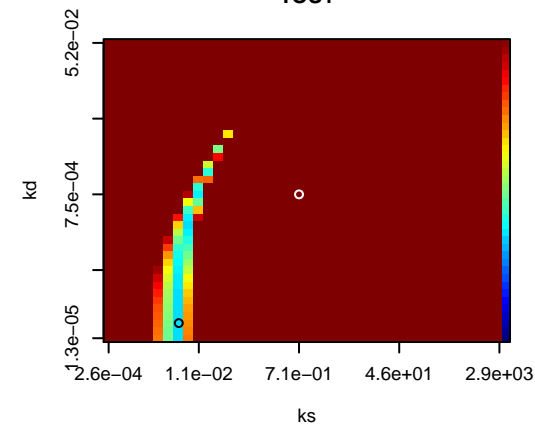

IRC22

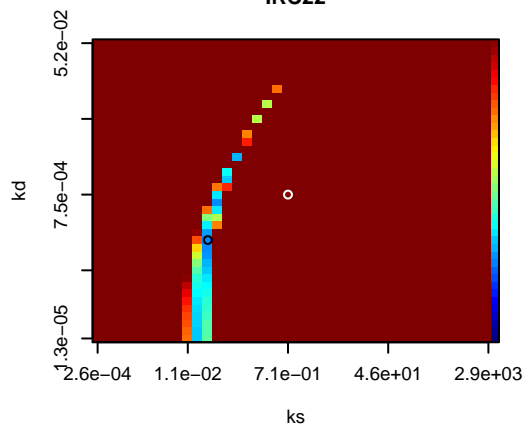

ACO2

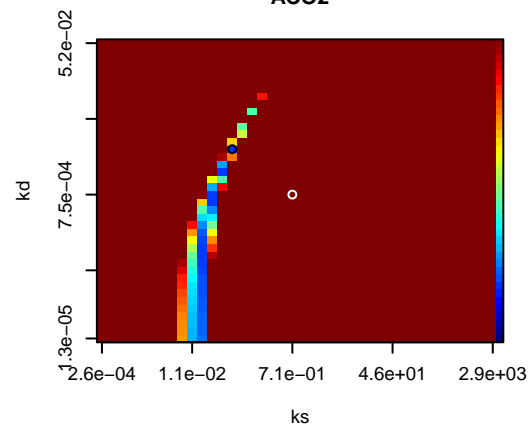

YCK1

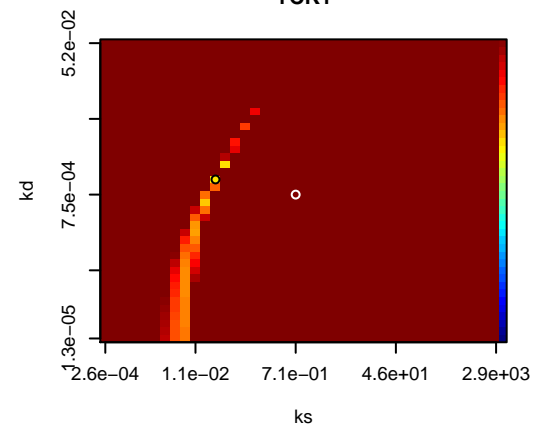

ABP140

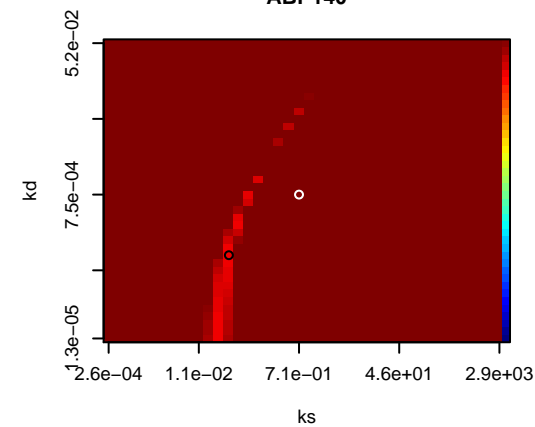

**BFR1**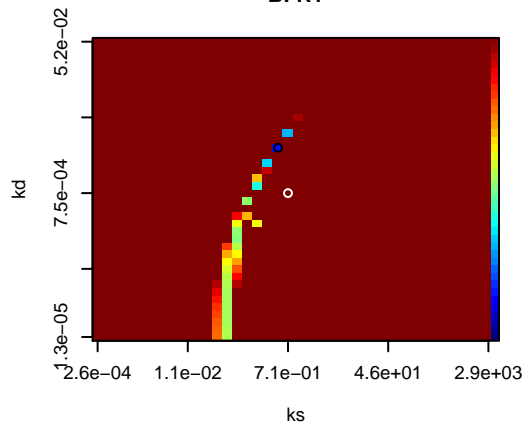**MYO2**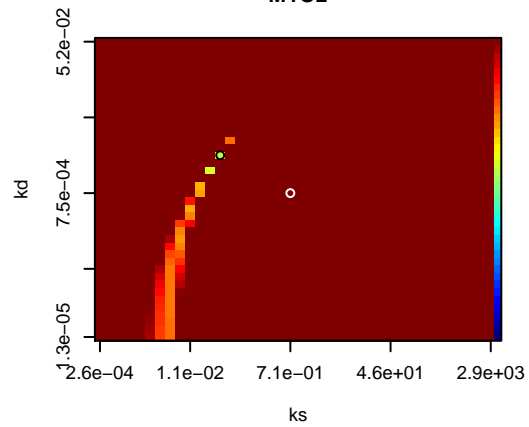**POM152**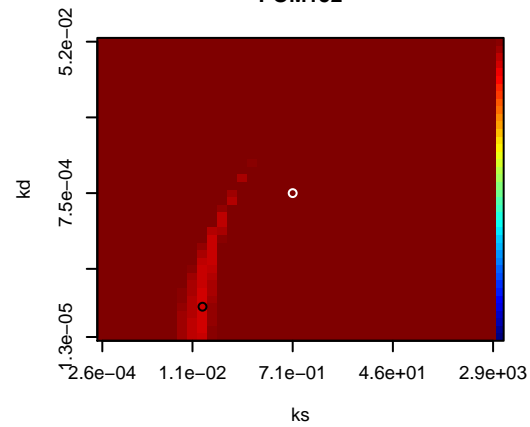**LCB1**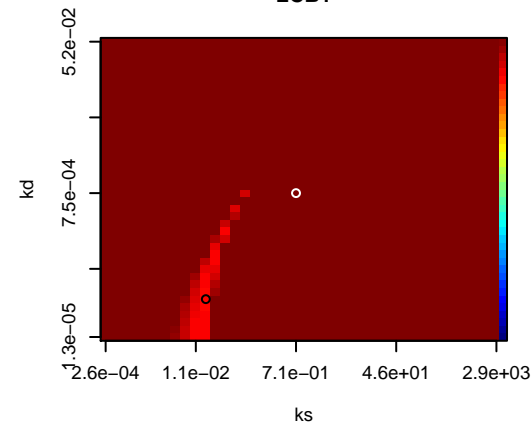**BAT1**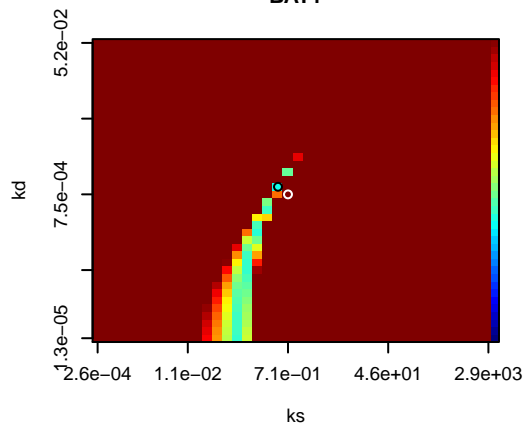**LEU9**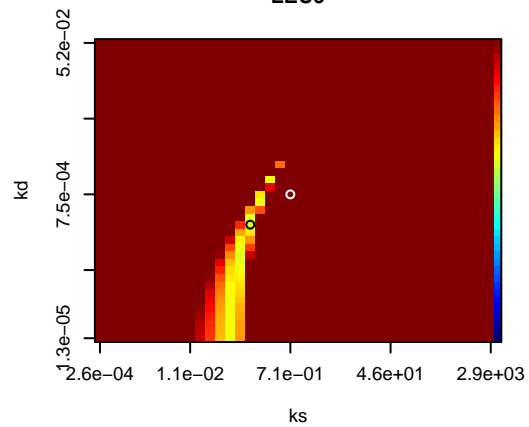**RPC82**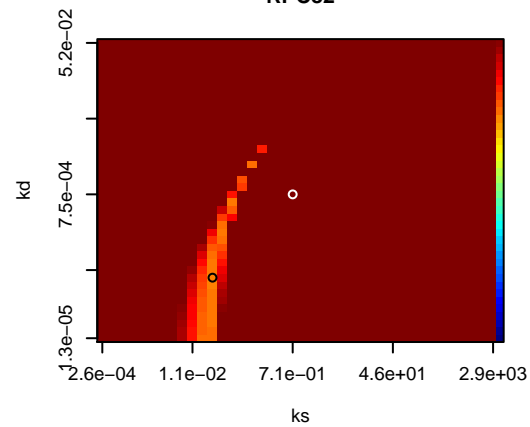**UTP23**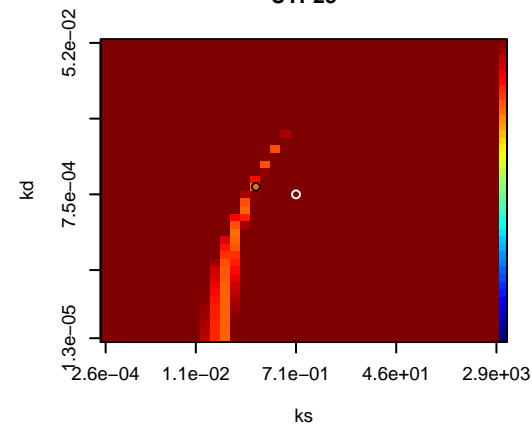**NAT1**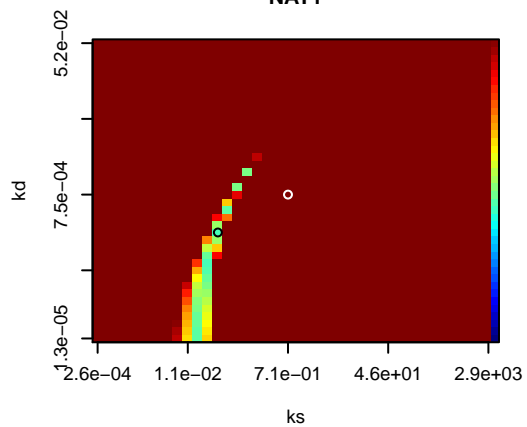**BEM2**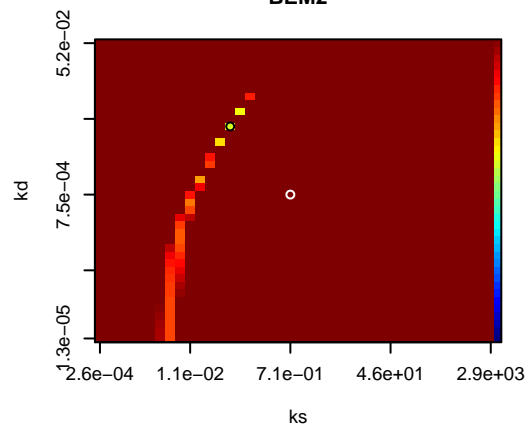**RTS1**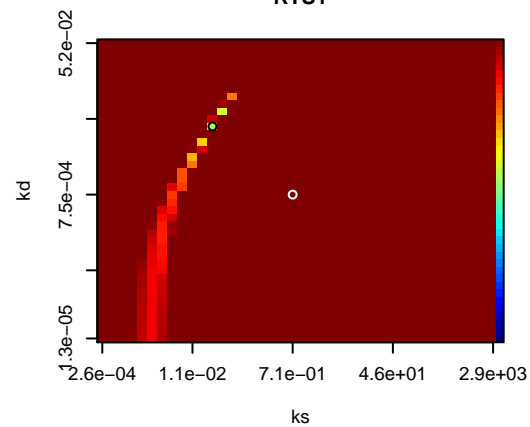**TFG2**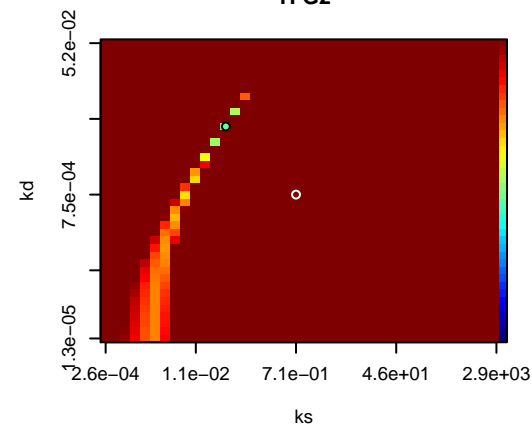



**RTN1**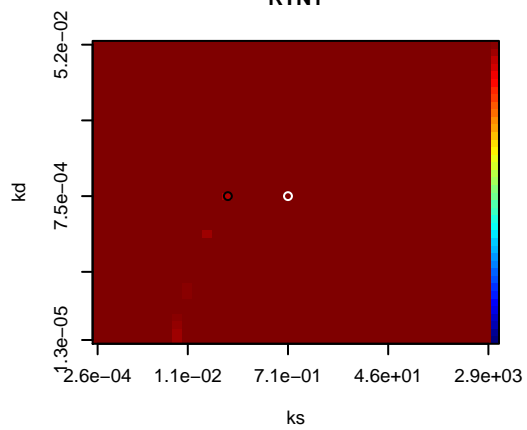**EAP1**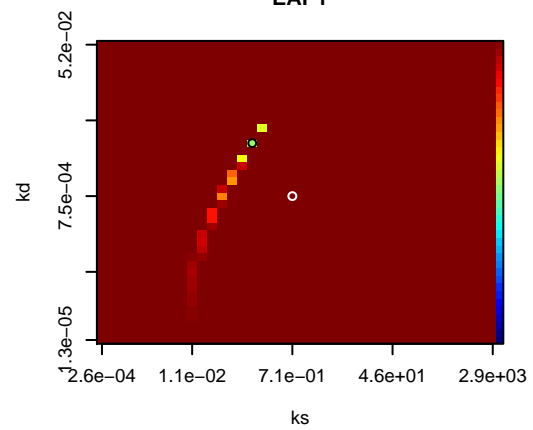**SPT6**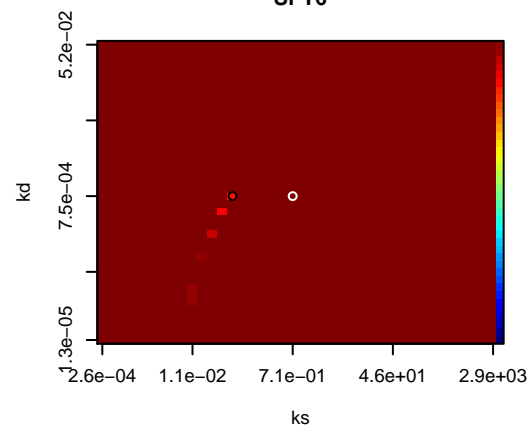

Supplement: c4mb00358f2.zip [file c4mb00358f2.zip]
