# Supplementary material for: One third of dynamic protein expression profiles can be predicted by a simple rate equation
Source: Royal Society of Chemistry journal article supplement (doi:10.1039/c4mb00358f), 2014-08-01

RPS22B

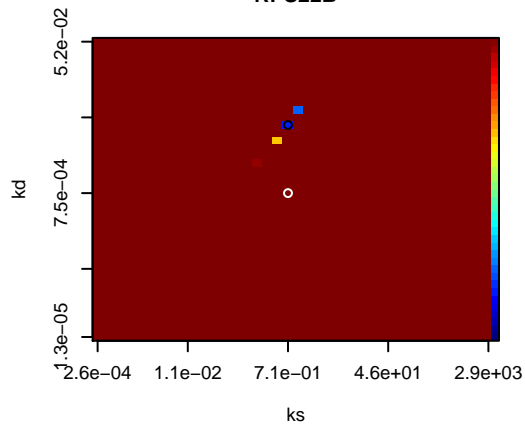

YNL010W

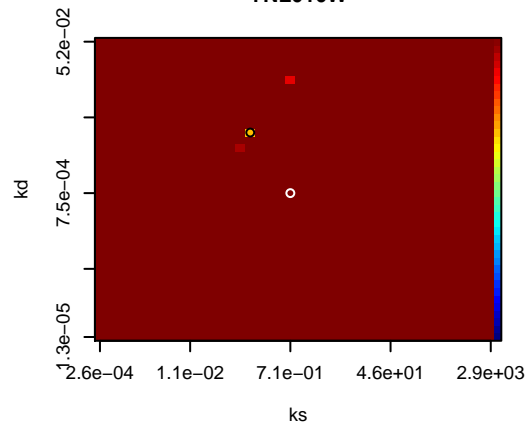

UBX2

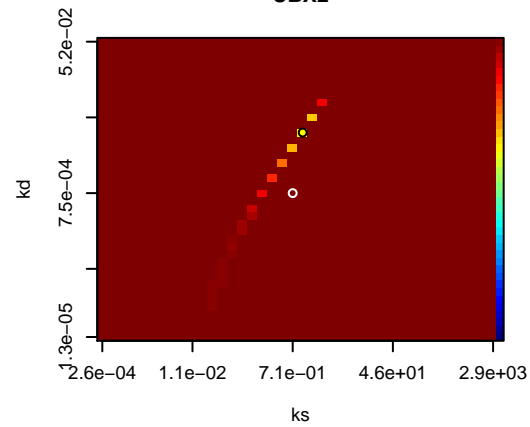

GRS1

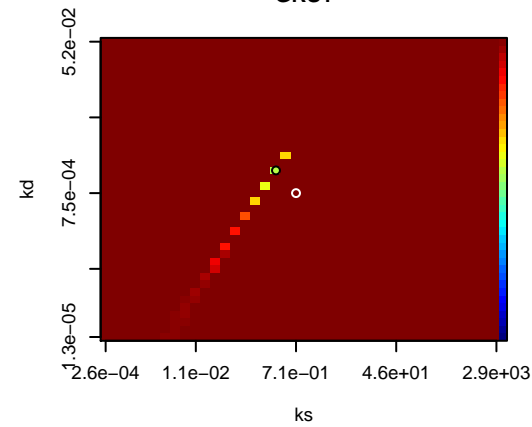

SRP14

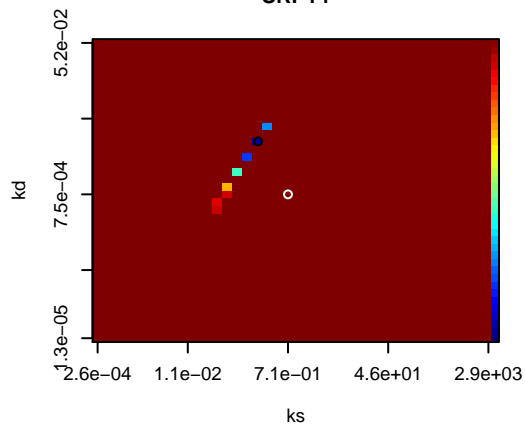

PRE6

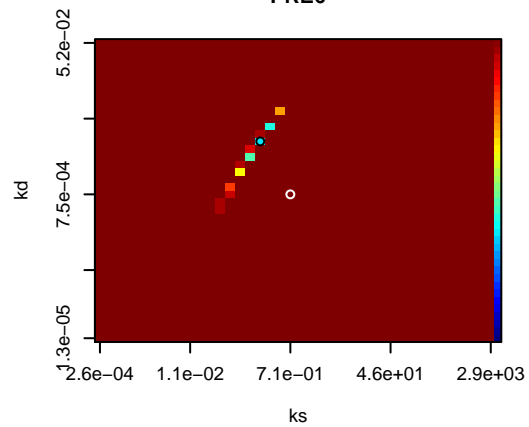

ILV6

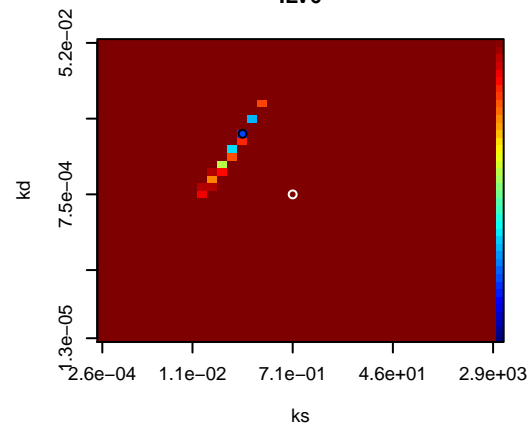

NUP82

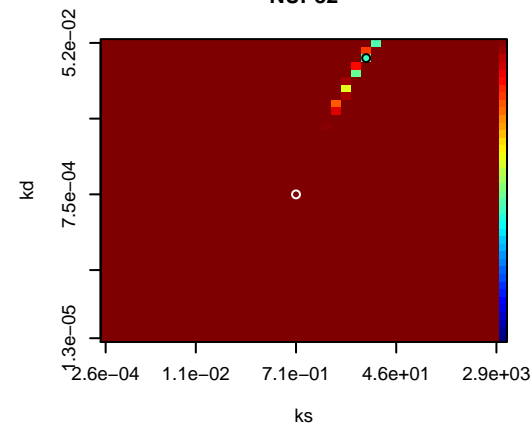

SKI2

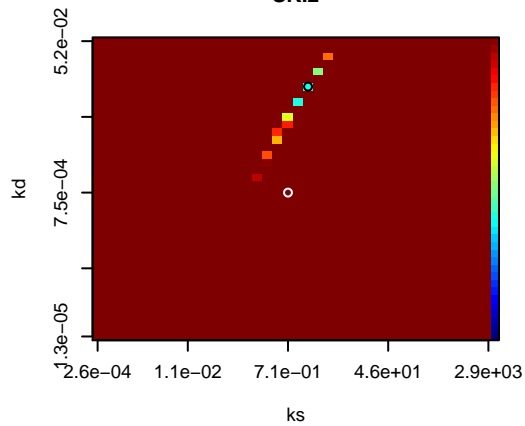

CTR9

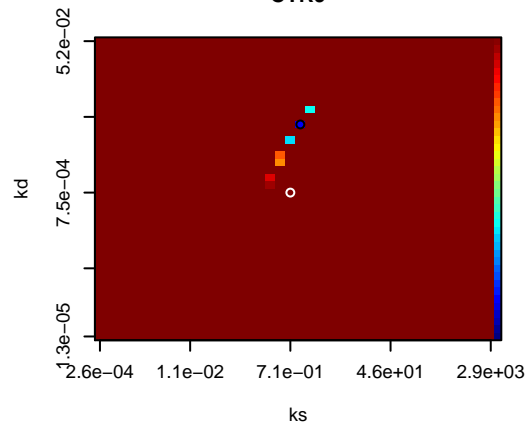

COY1

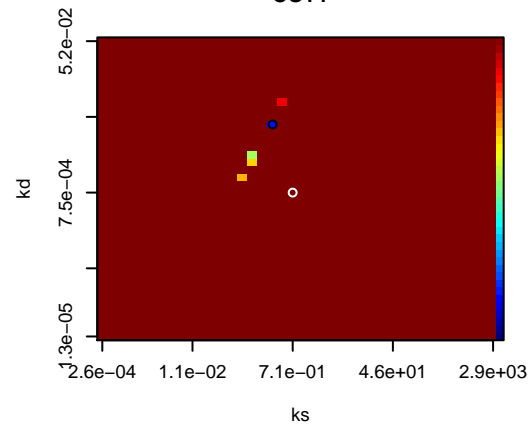

RVB2

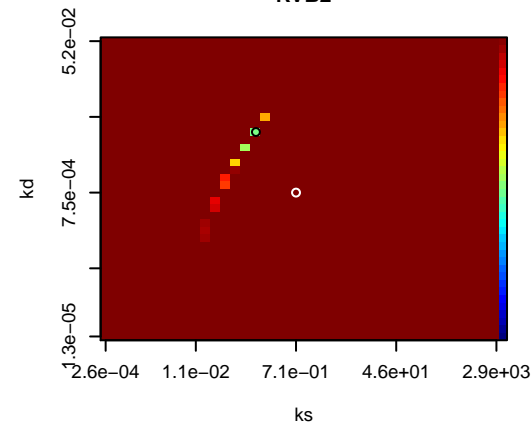

PRE2

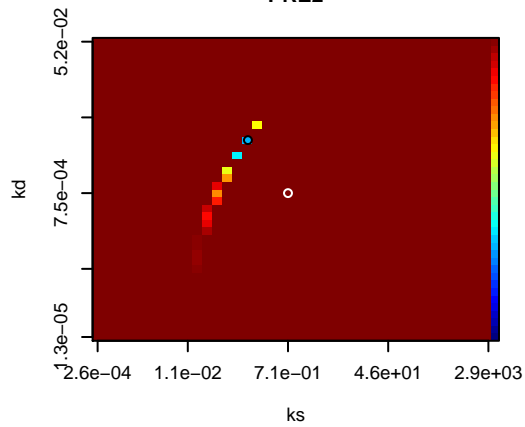

MVP1

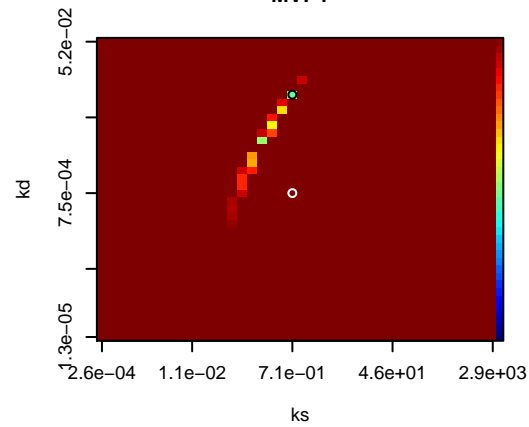

INO80

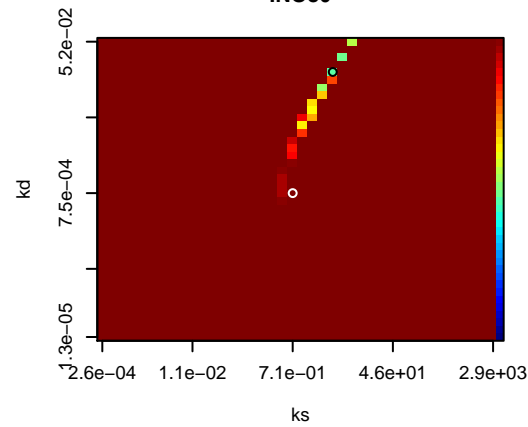

ECM14

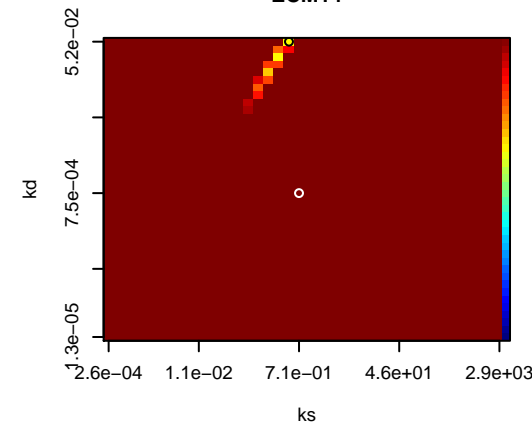

SCL1

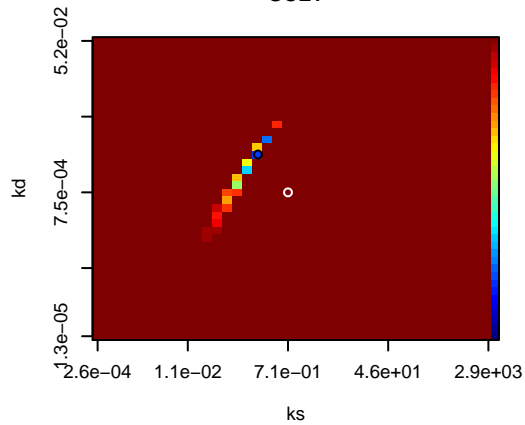

RPL13B

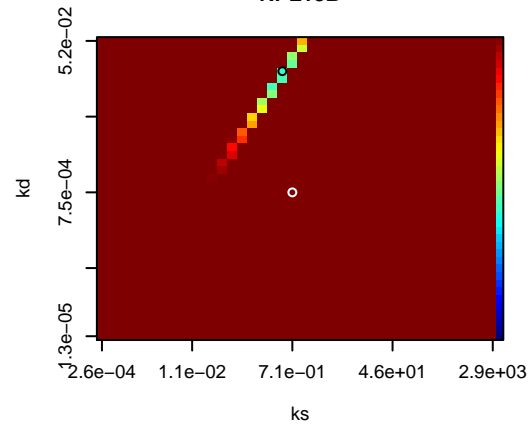

RIX1

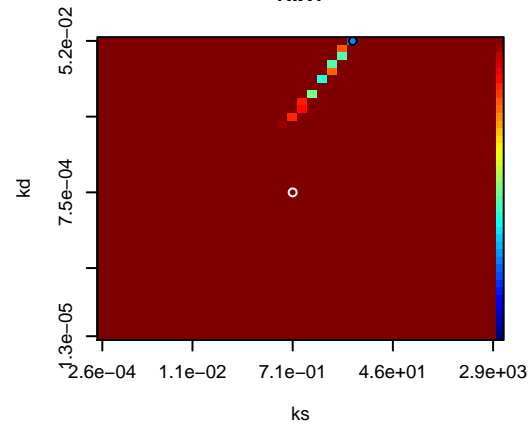

RPS4A

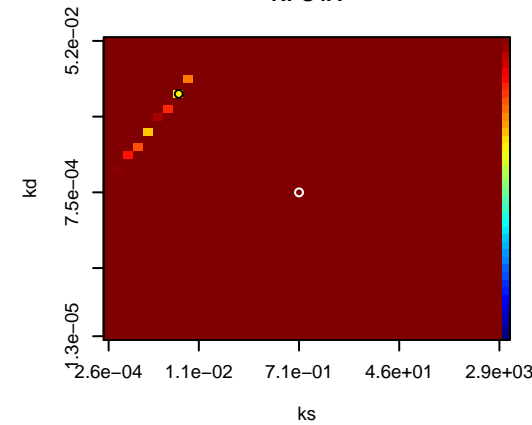

BUD20

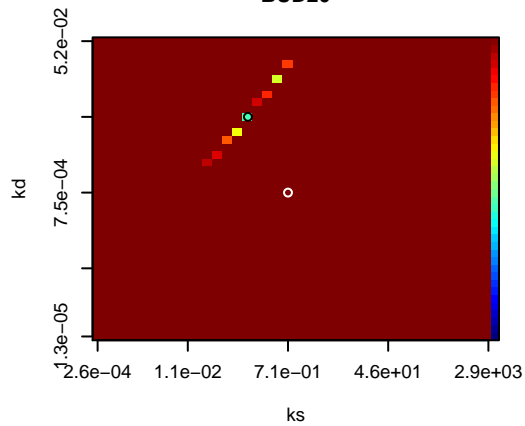

CAF20

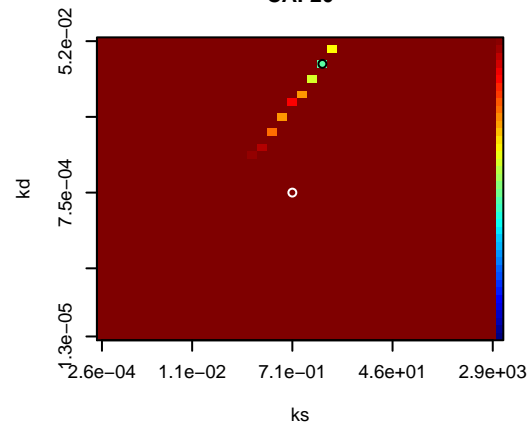

RPL12A

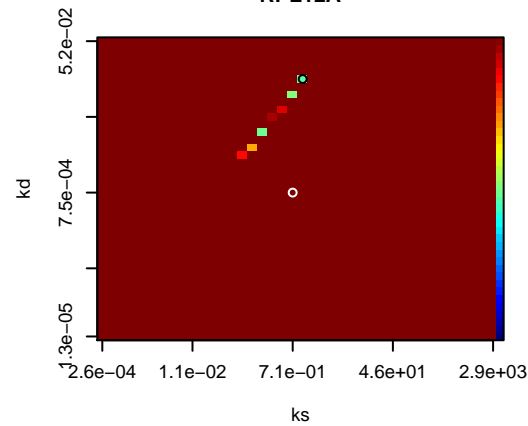

RIX7

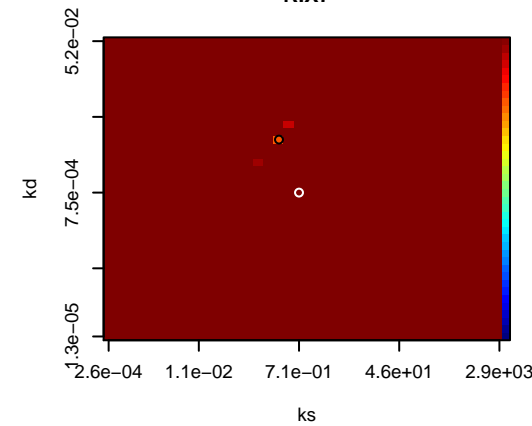

ARP5

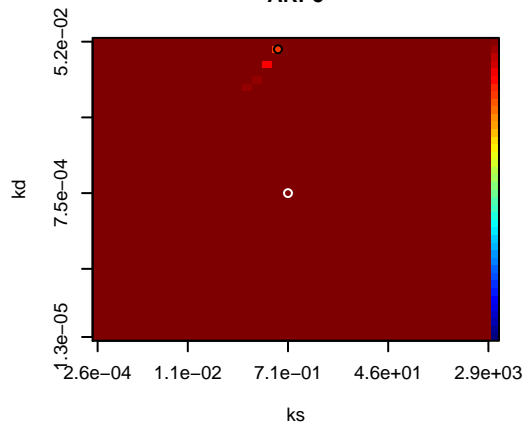

ERG8

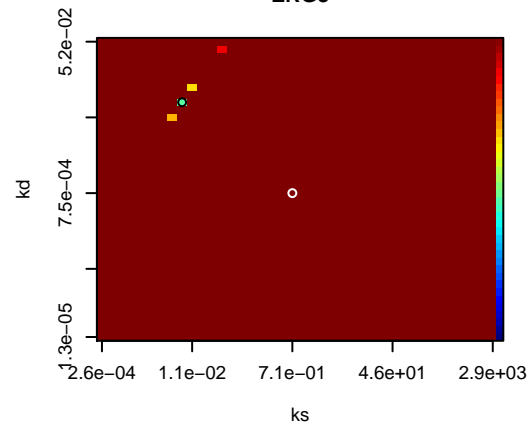

HHF2

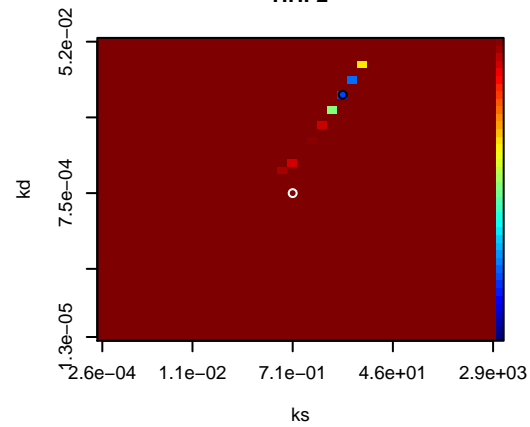

GAR1

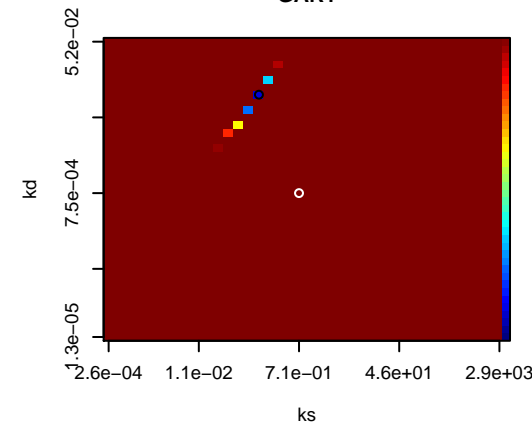

RPS23B

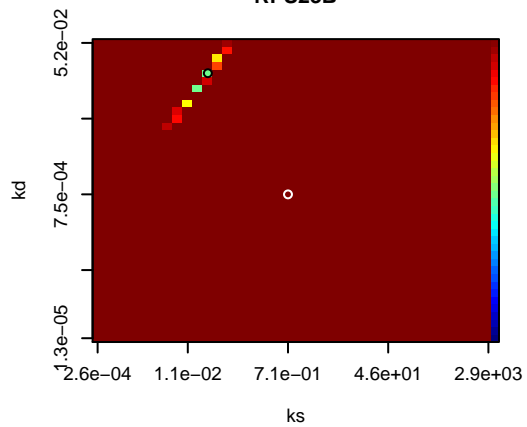

PMA1

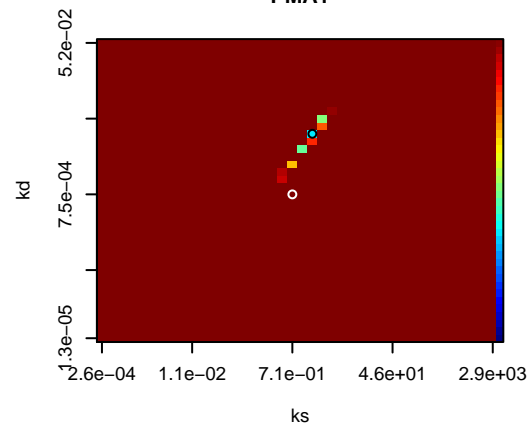

TSC10

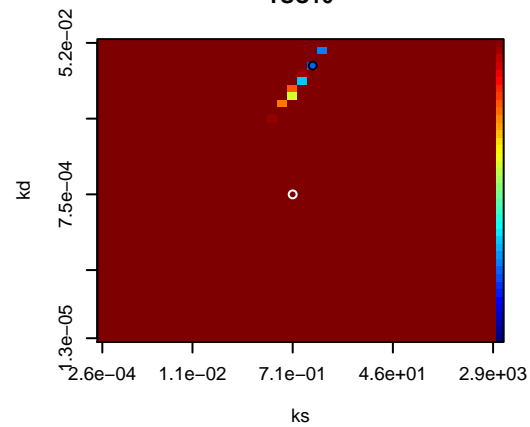

PHO3

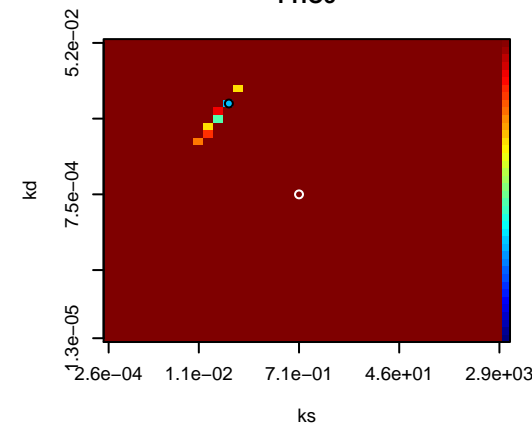

RPL3

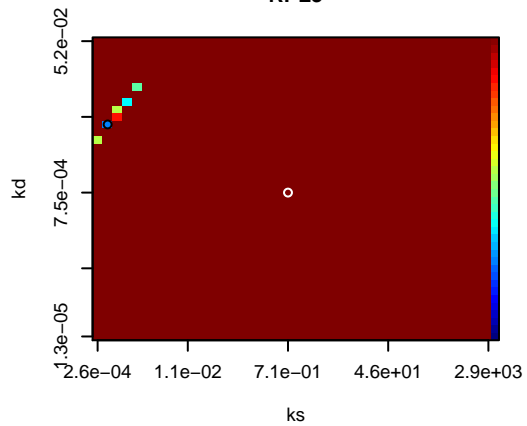

RPS17A

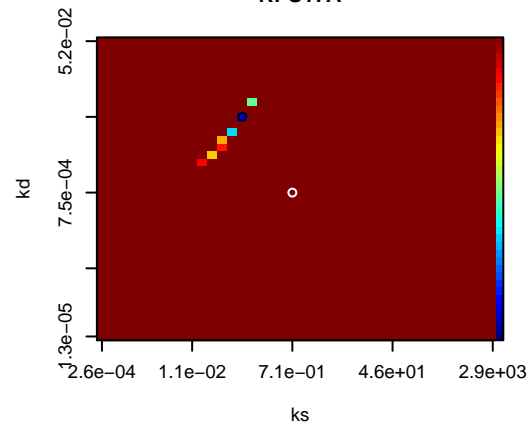

RPL1A

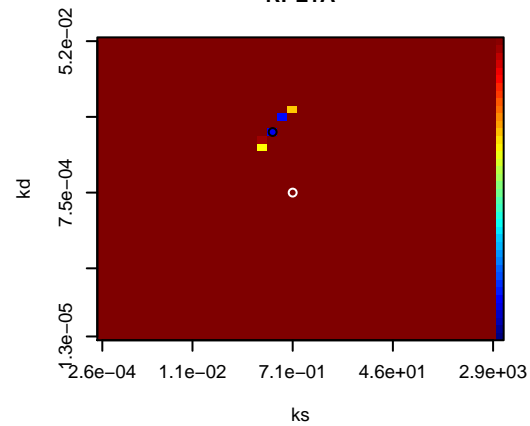

MCM6

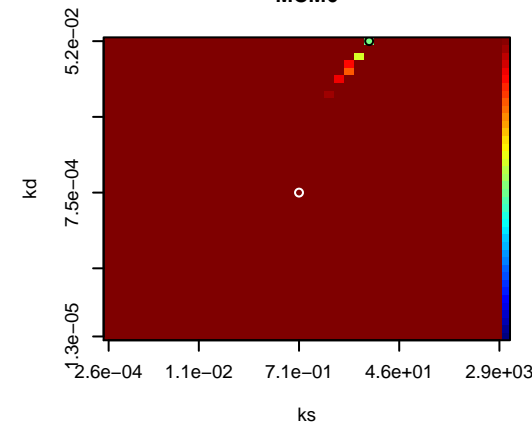

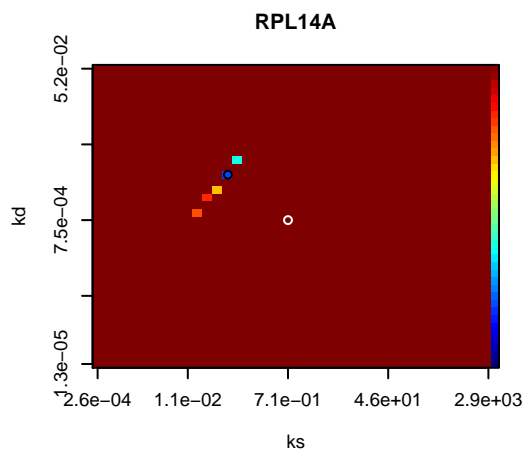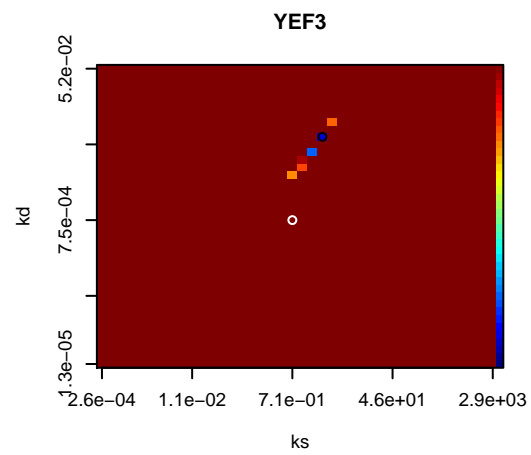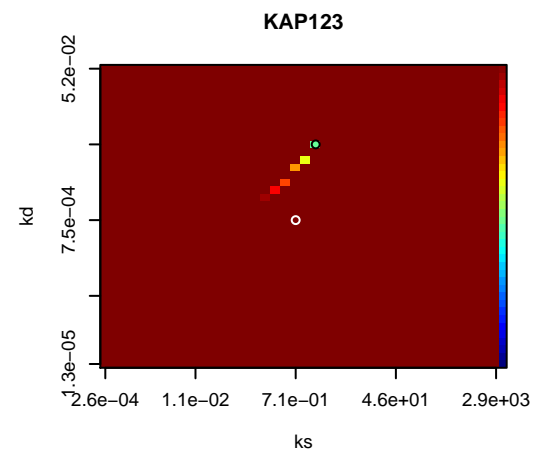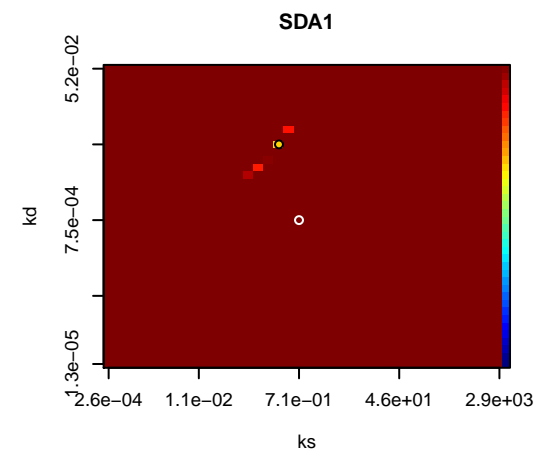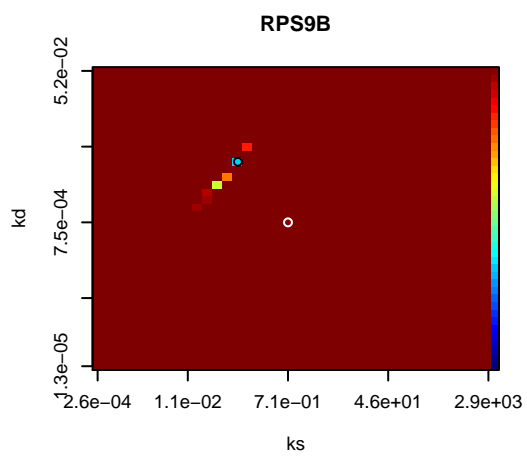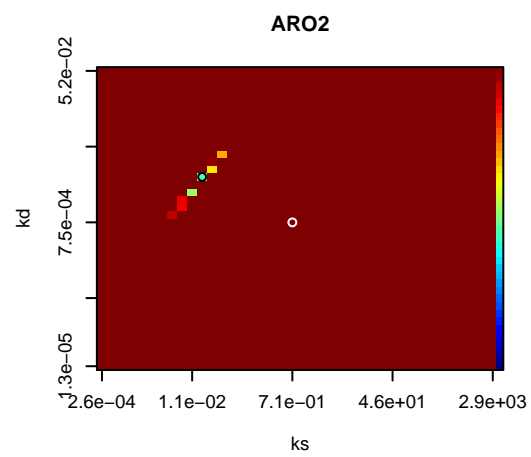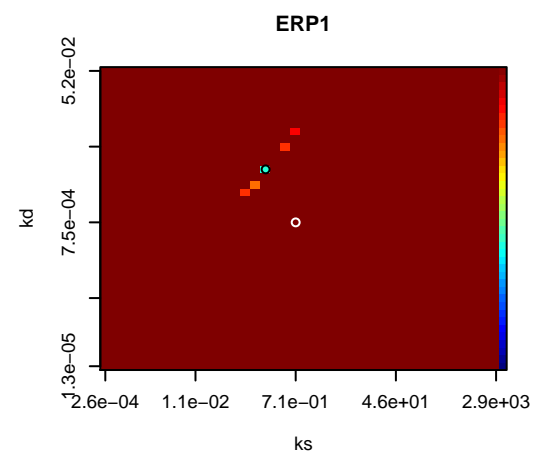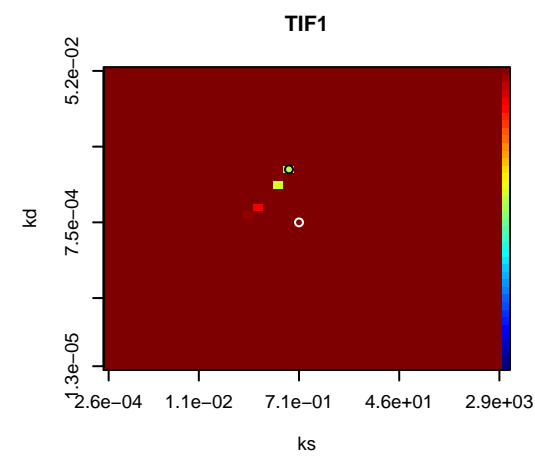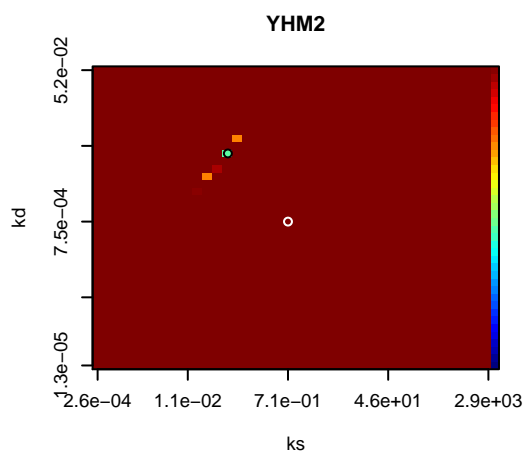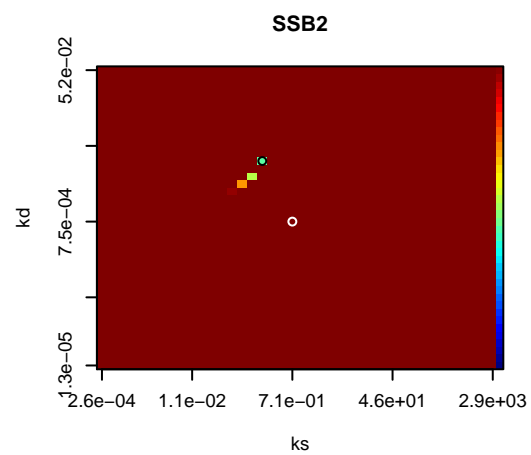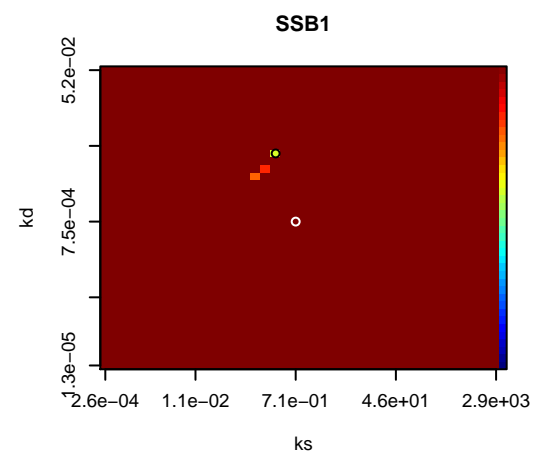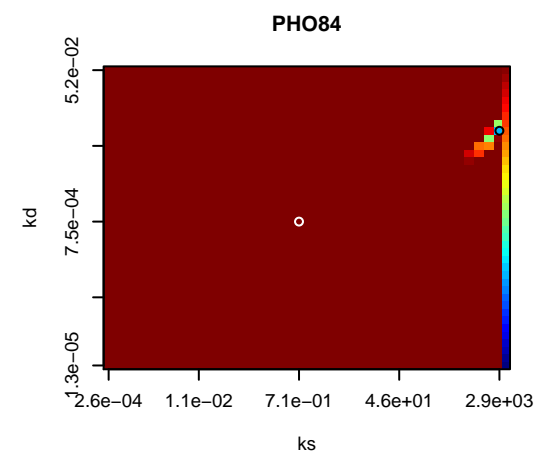

YTA12

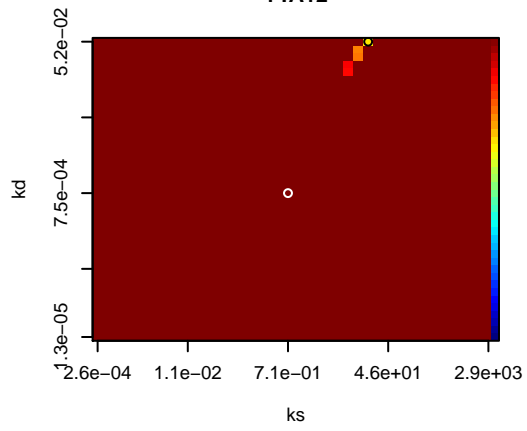

GDA1

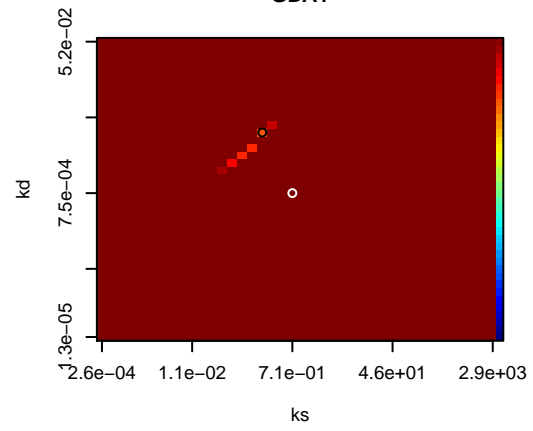

RPL42A

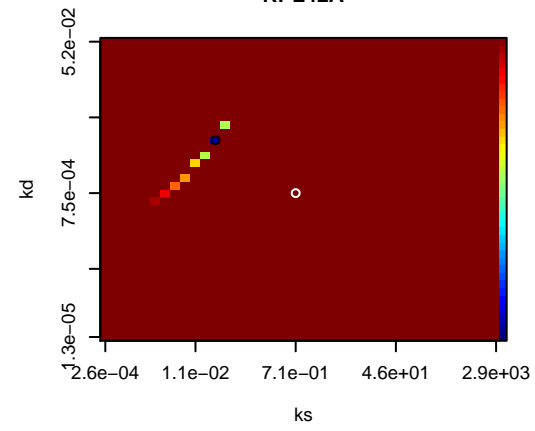

RPS24B

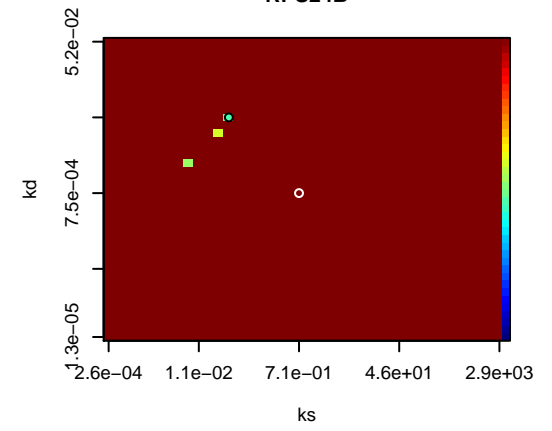

MSS116

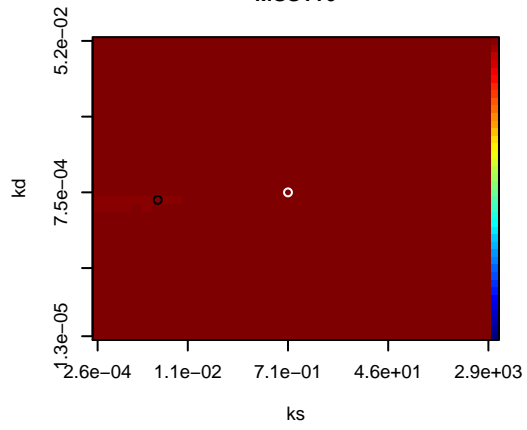

YME1

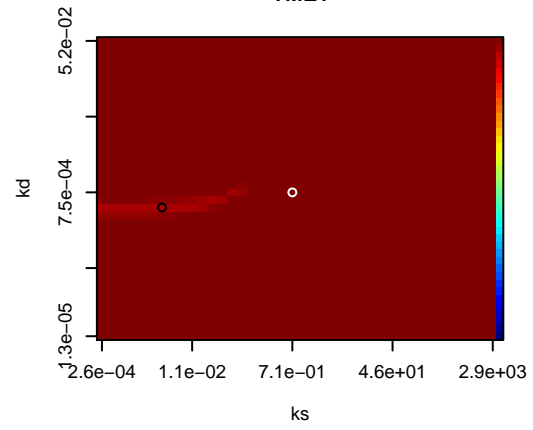

Supplement: c4mb00358f2.zip [file c4mb00358f2.zip]
