# Supplementary material for: One third of dynamic protein expression profiles can be predicted by a simple rate equation
Source: Royal Society of Chemistry journal article supplement (doi:10.1039/c4mb00358f), 2014-08-01

URA2

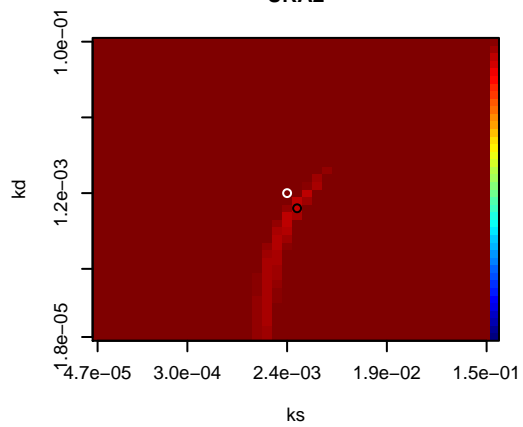

GDH1

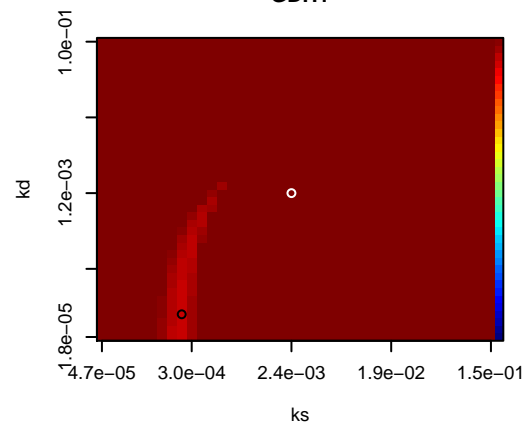

ARB1

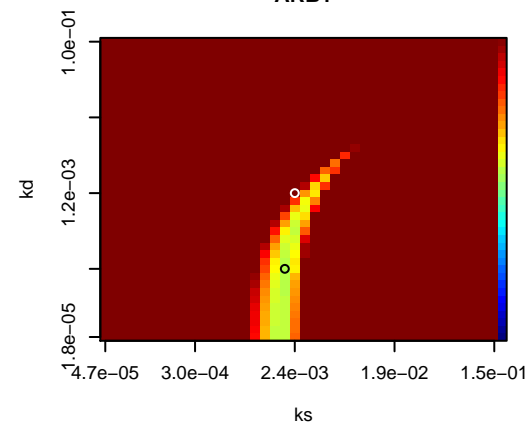

PDC1

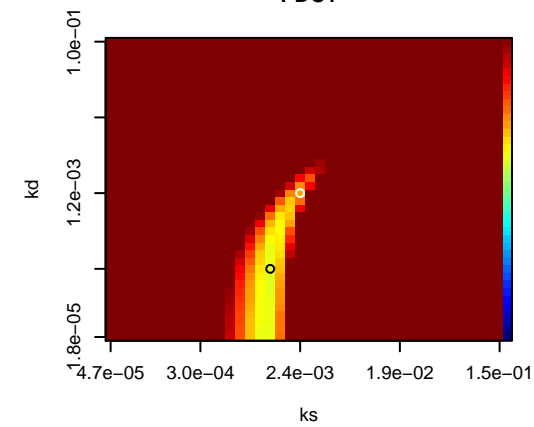

SSA4

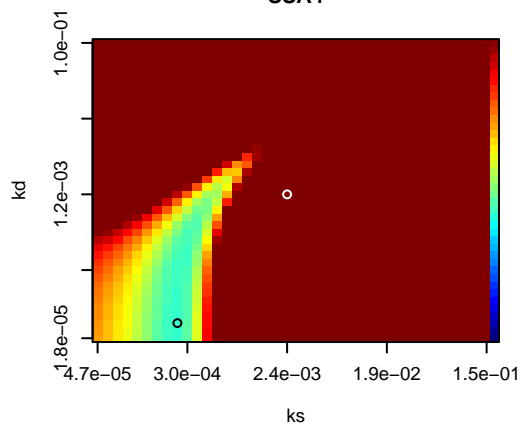

GND2

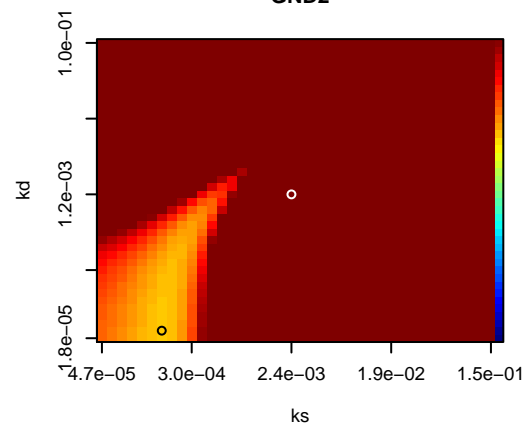

TY1B-GR3

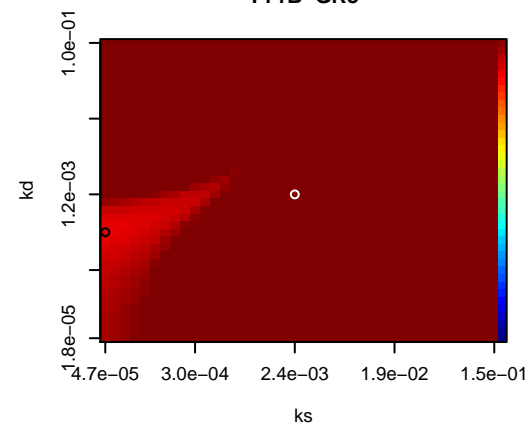

ARA1

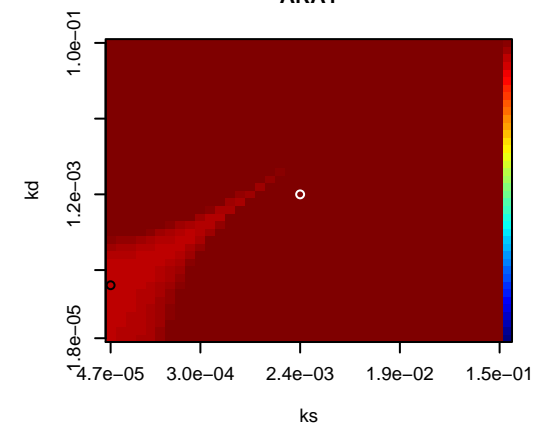

TDH3

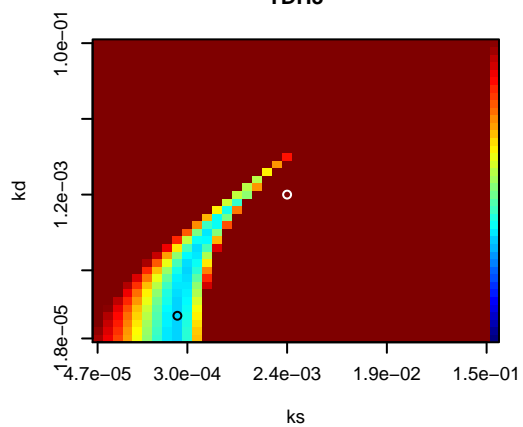

TDH2

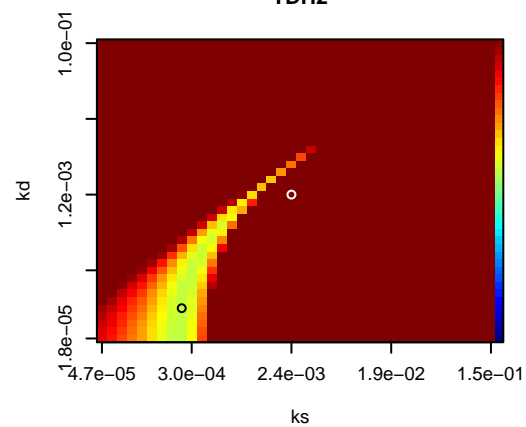

RPS20

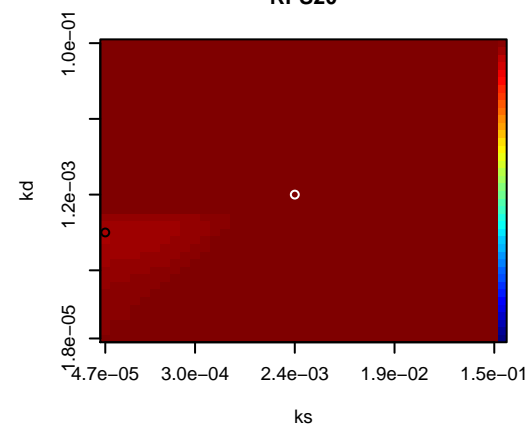

YEF3

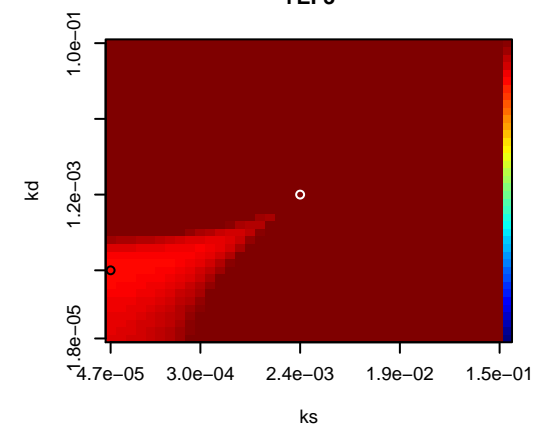

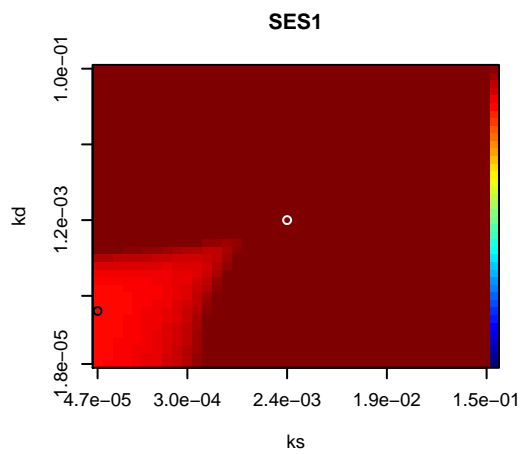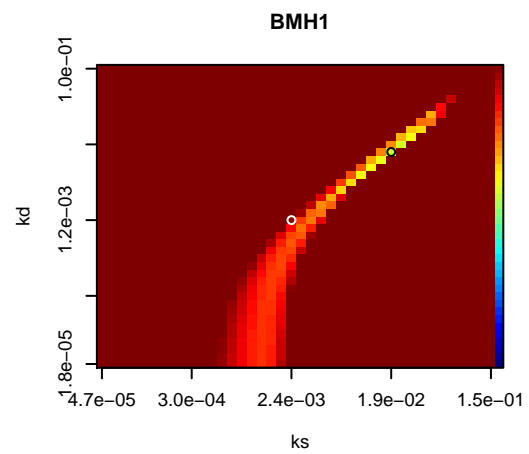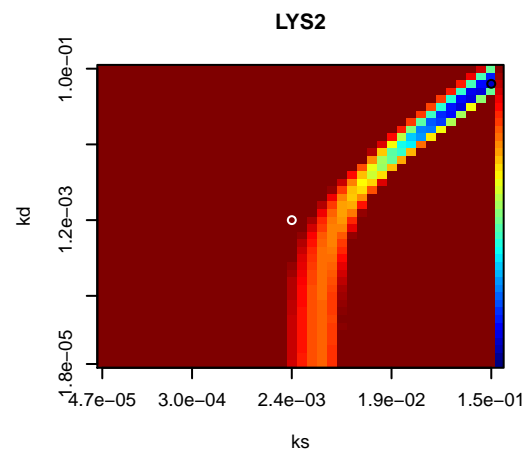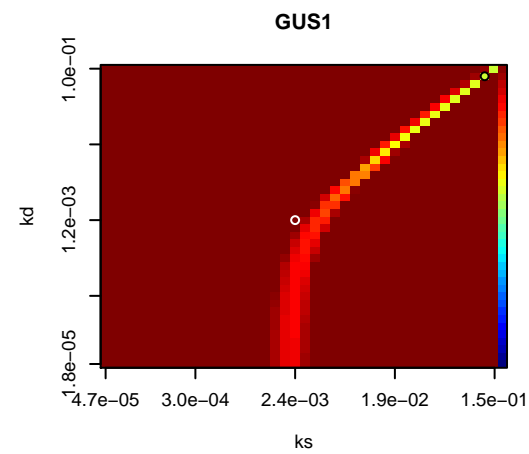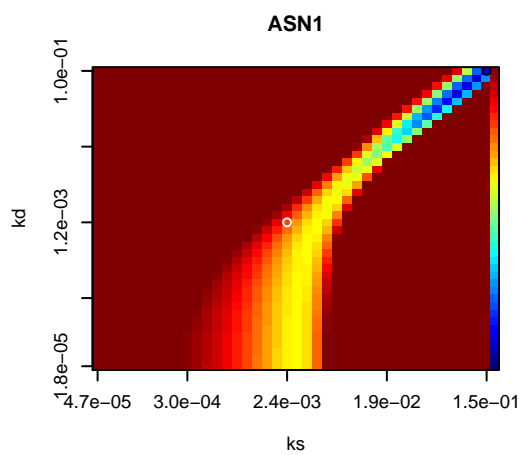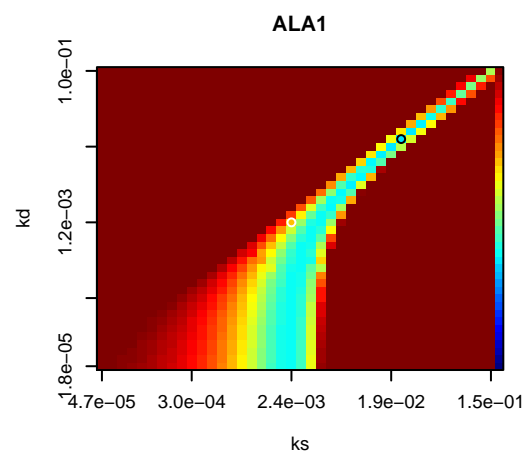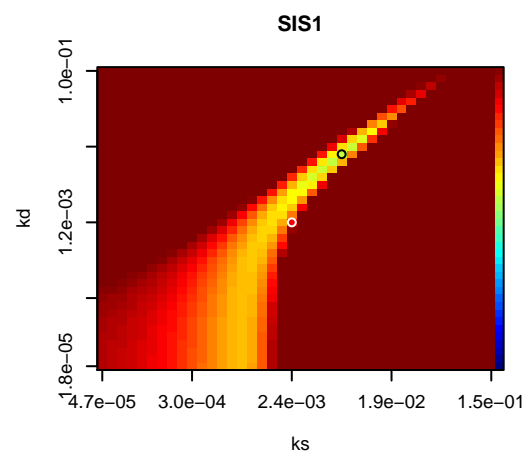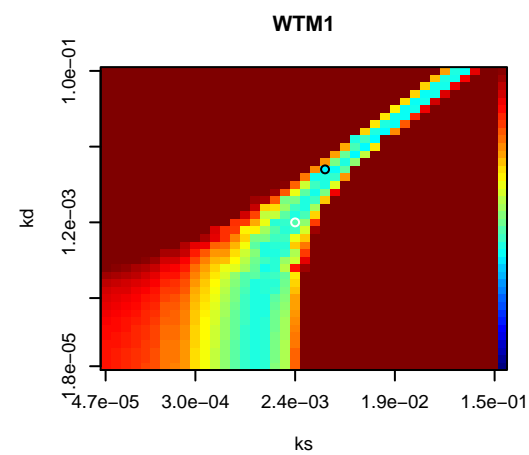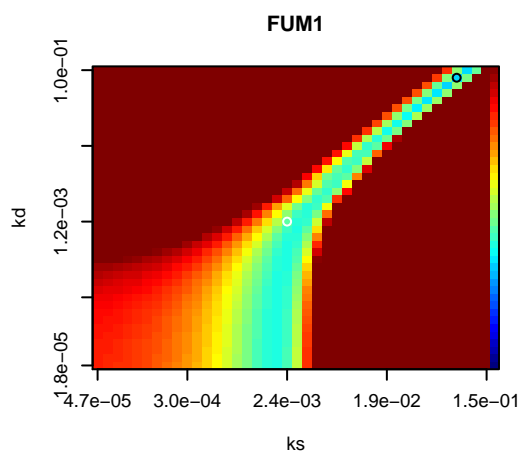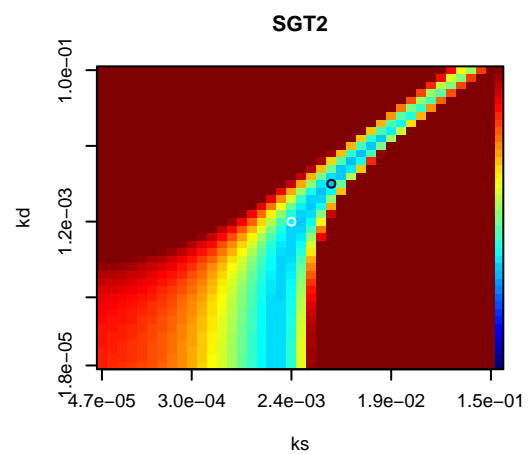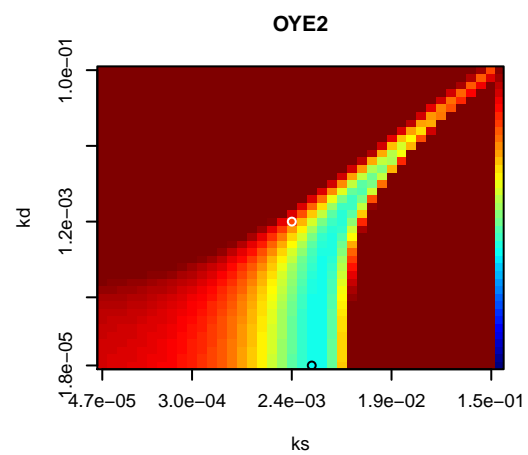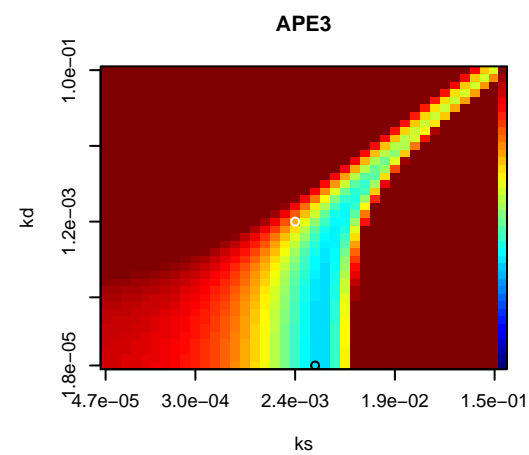

GDI1

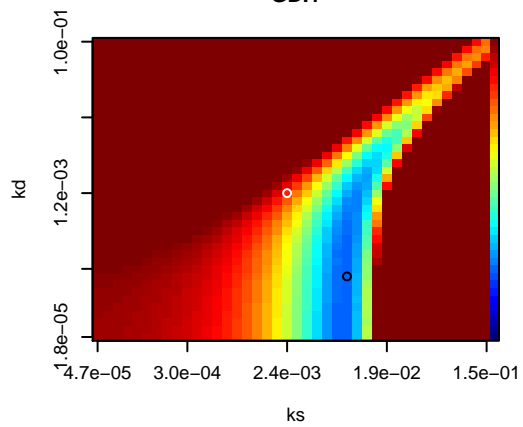

LSP1

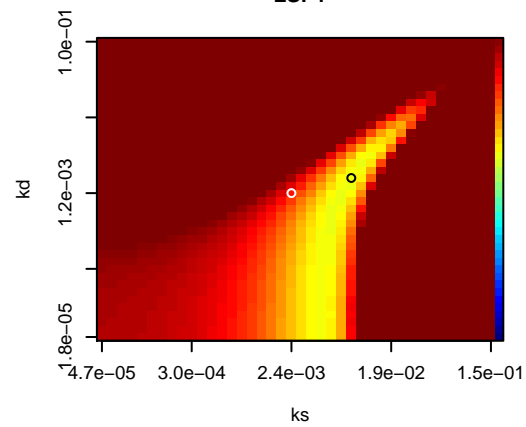

RNR4

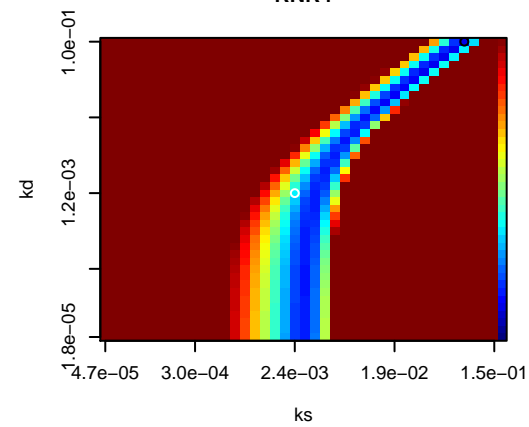

RNR2

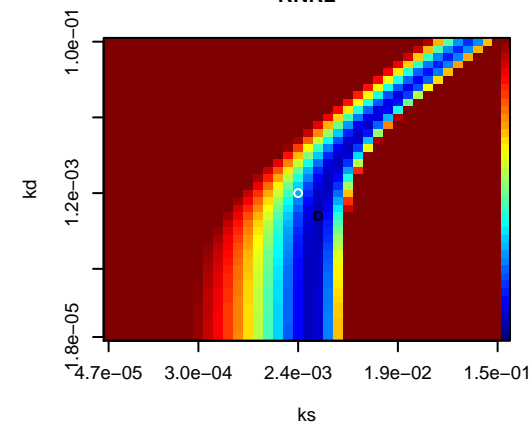

IDH1

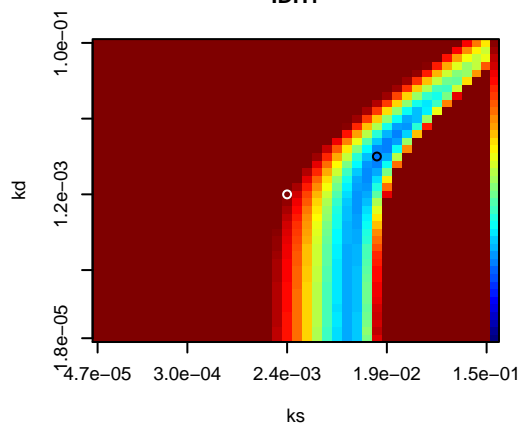

IDH2

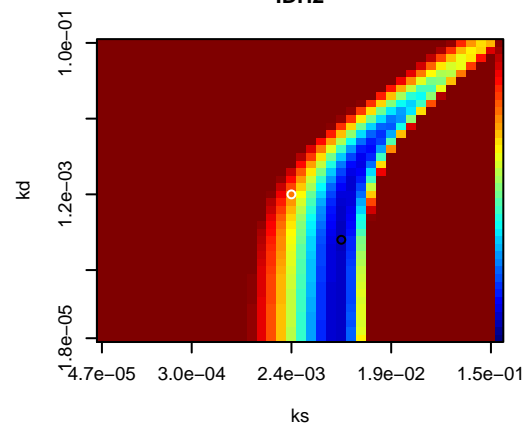

ACO1

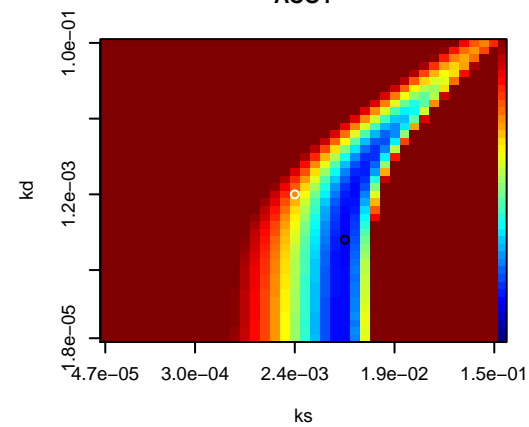

YCP4

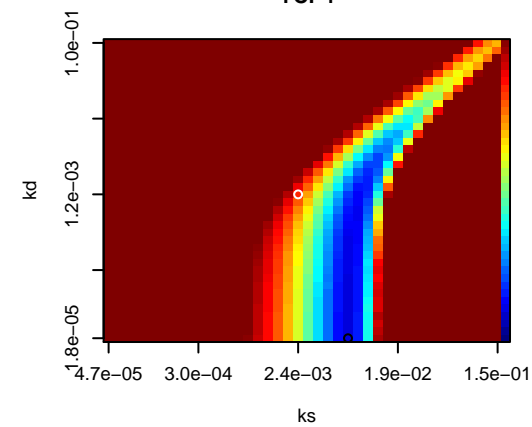

DLD3

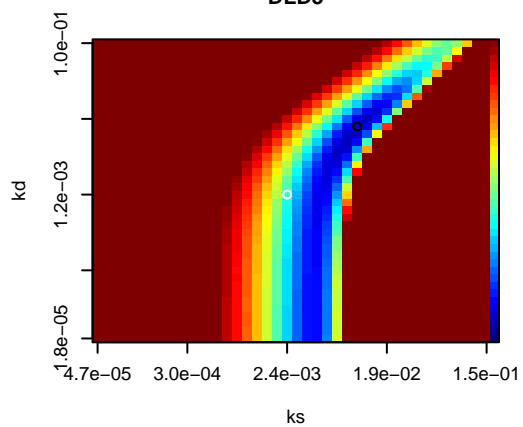

SSE1

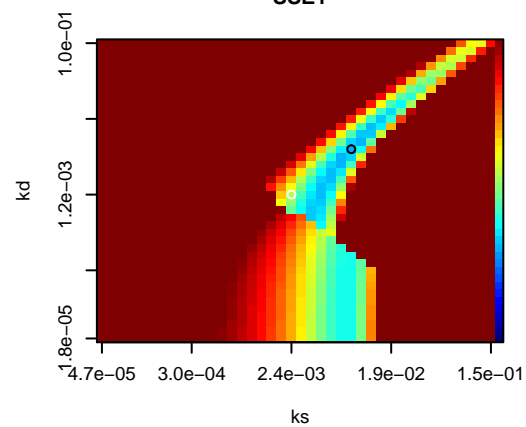

PFK1

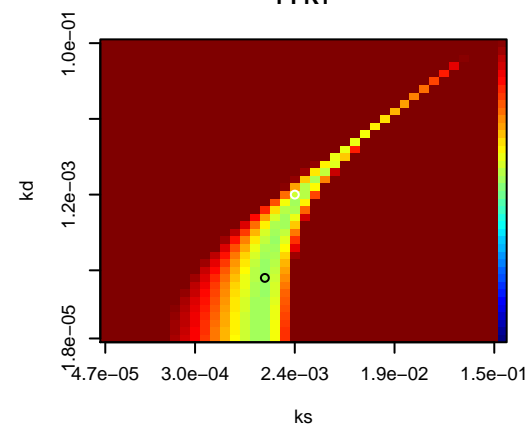

GND1

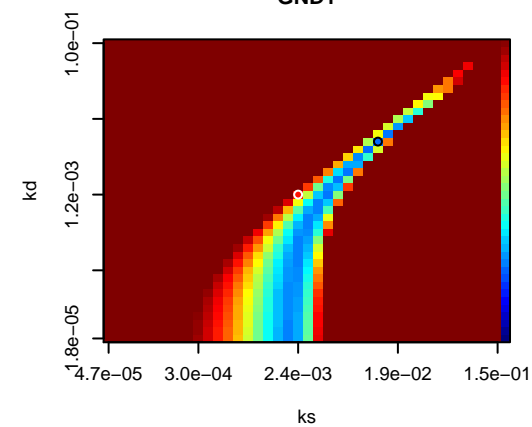

ECM33

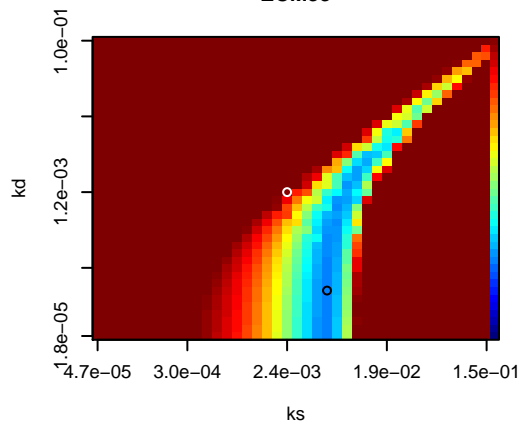

PDB1

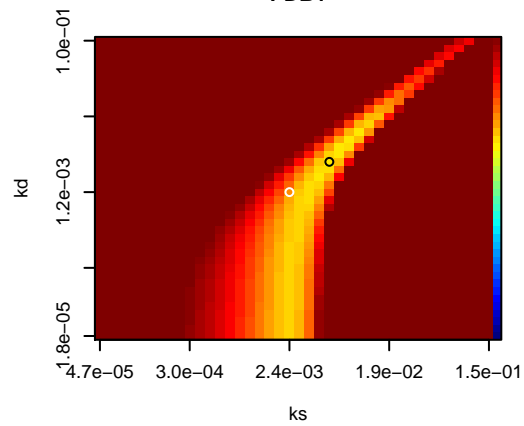

MCK1

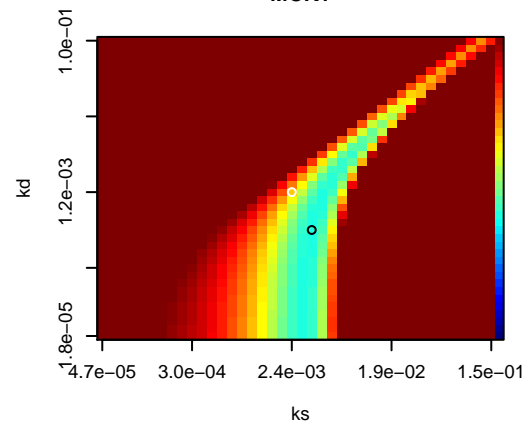

CCT8

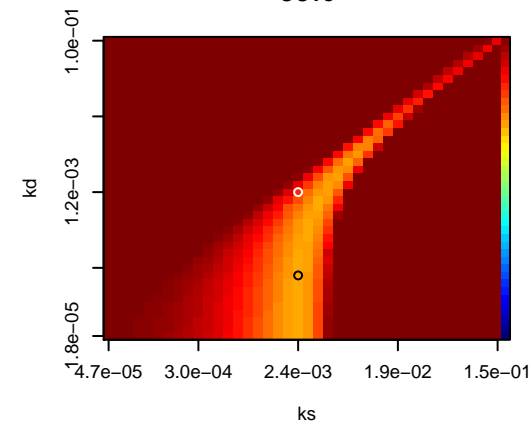

UBA1

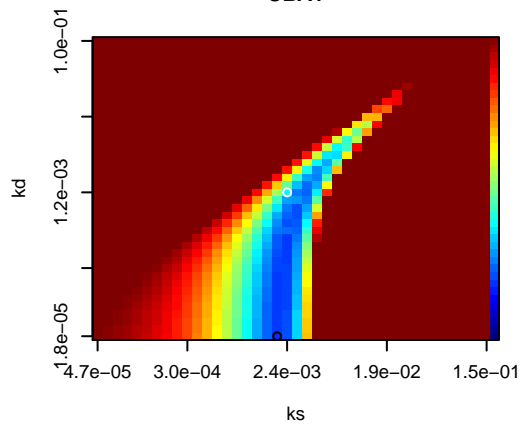

TUB1

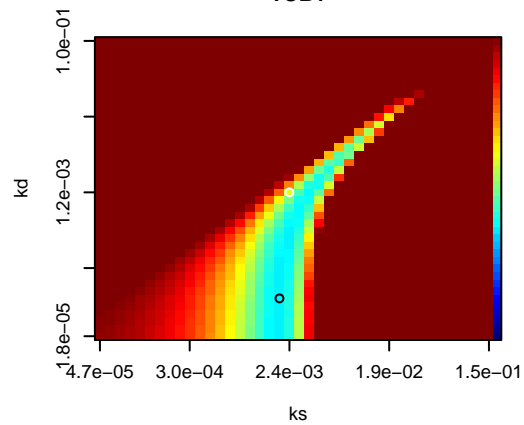

SSA3

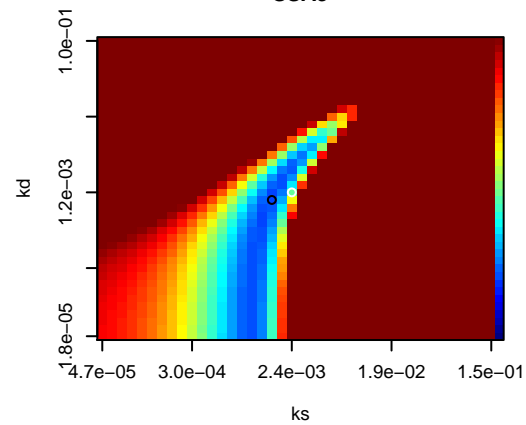

PIL1

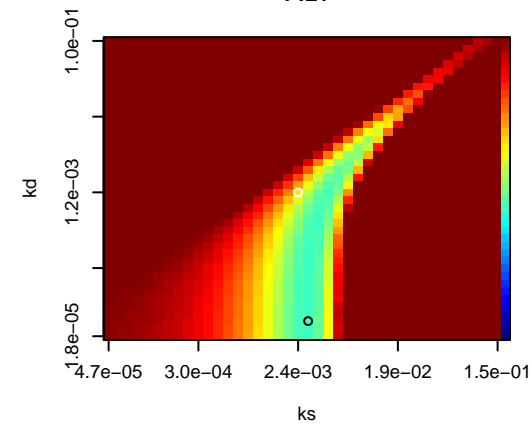

TY1B-BL

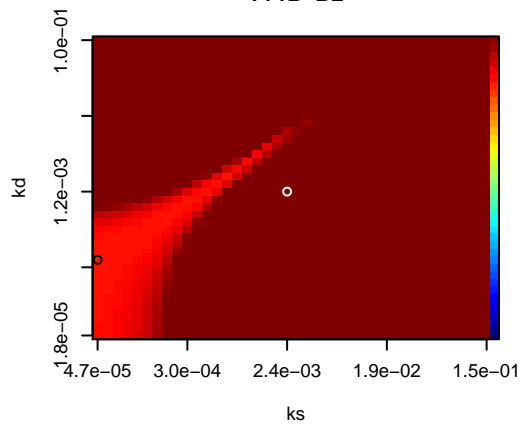

MES1

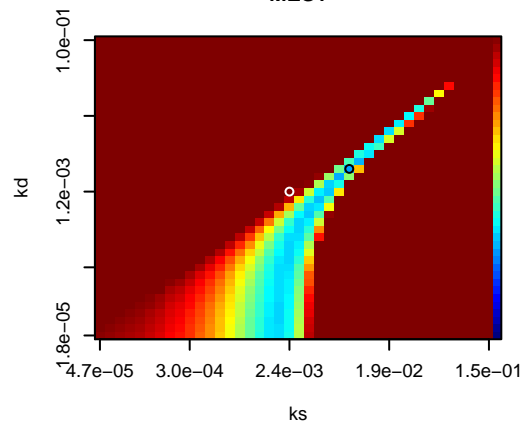

LEU4

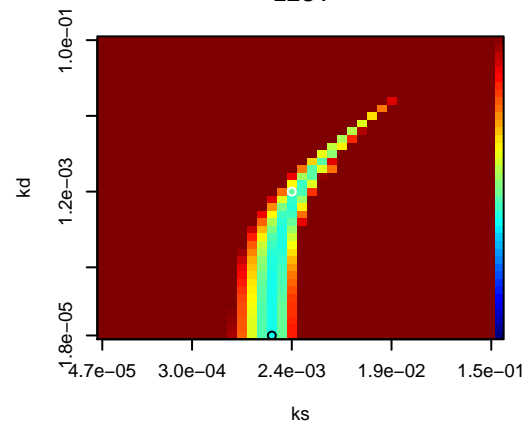

HSC82

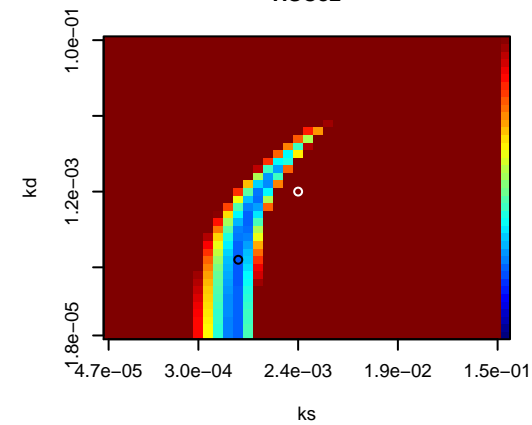



PMA1

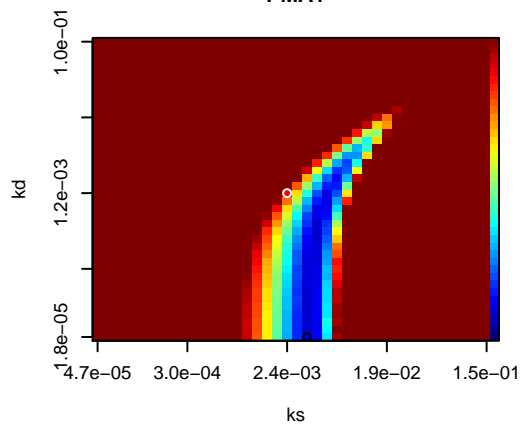

MDH3

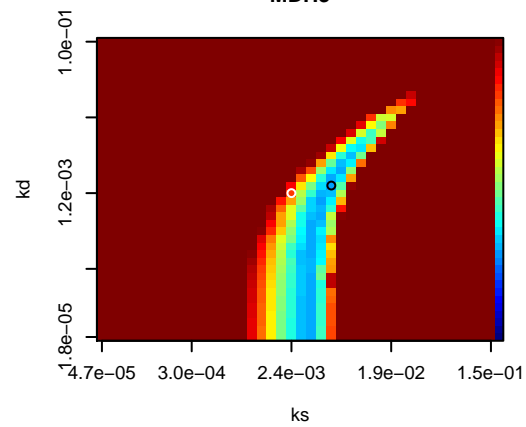

TRR1

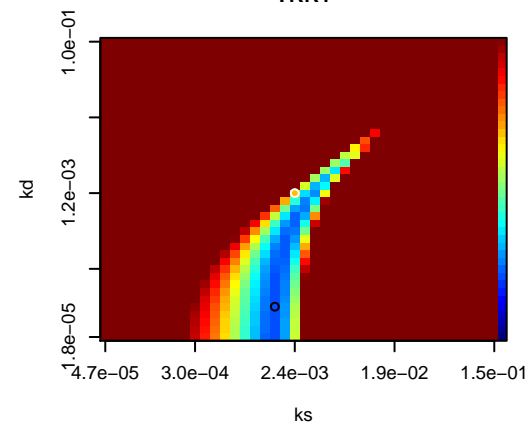

ALD6

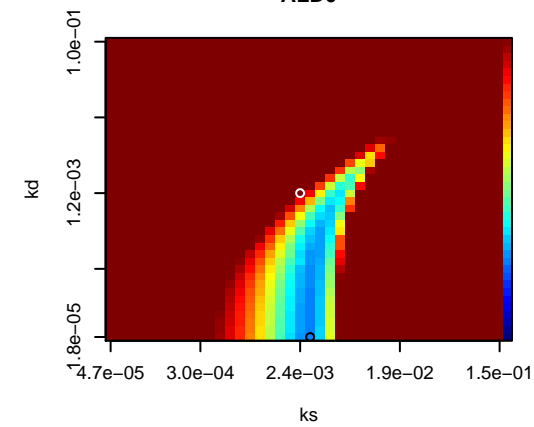

ILV6

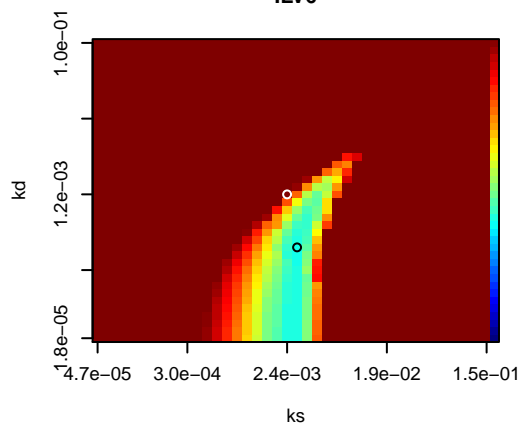

PDR5

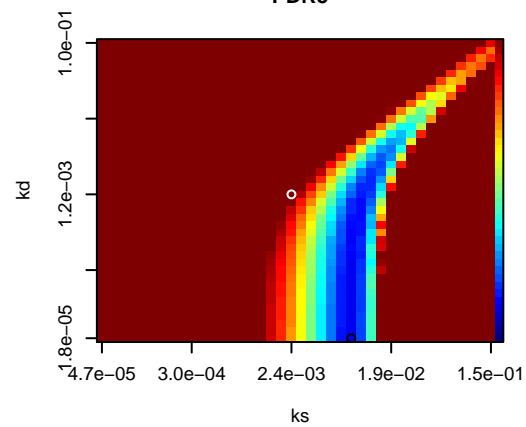

HTS1

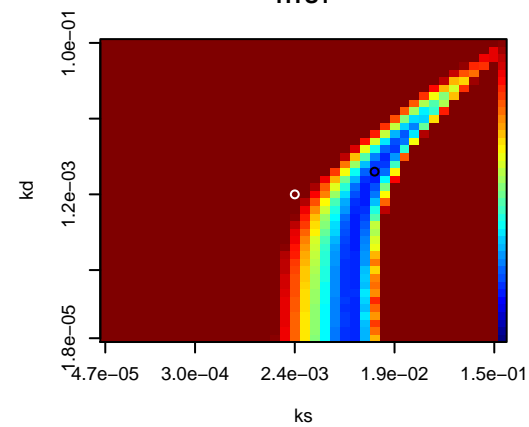

PRC1

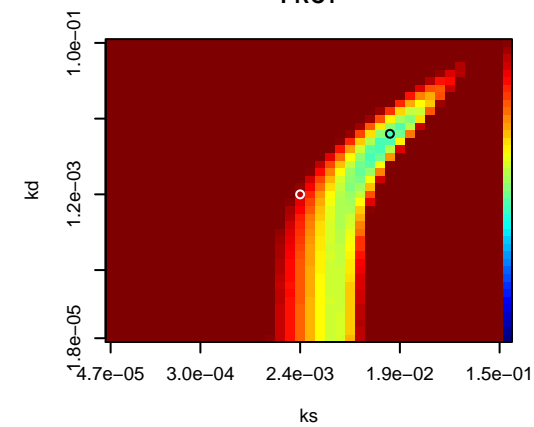

GLT1

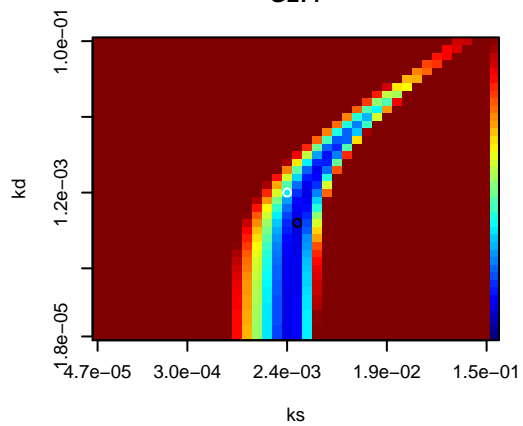

SSA1

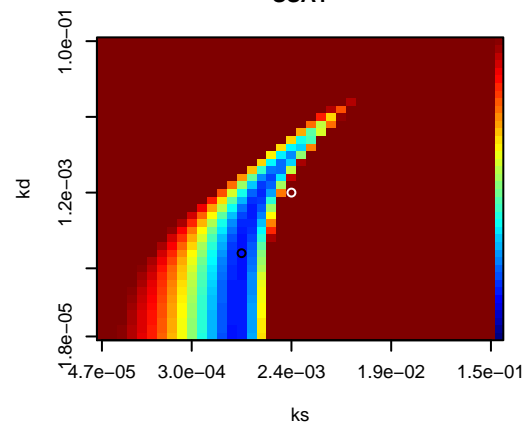

SSA2

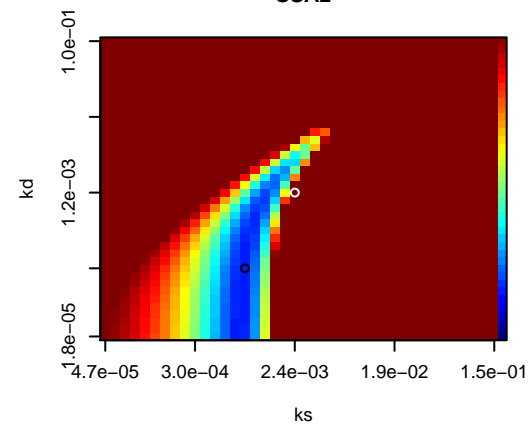

HSP60

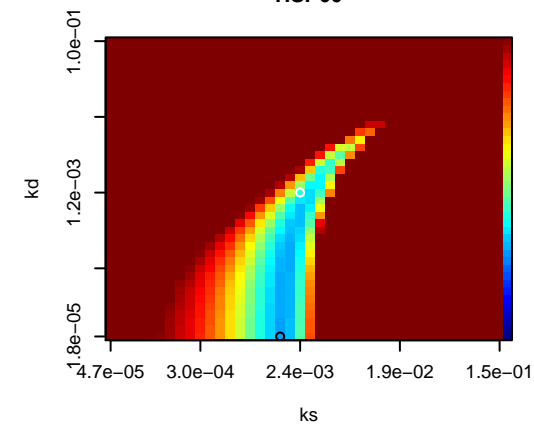

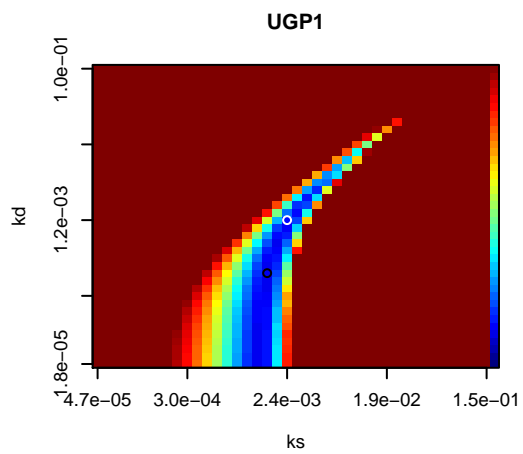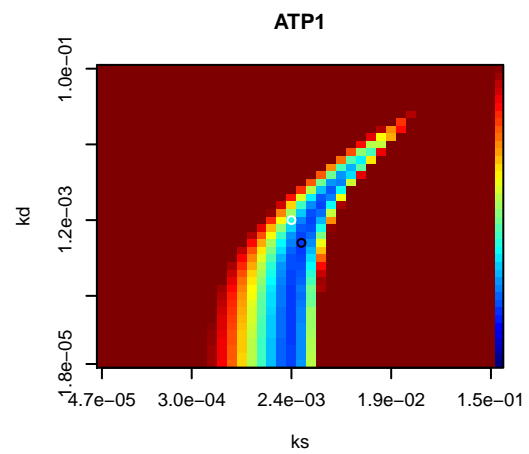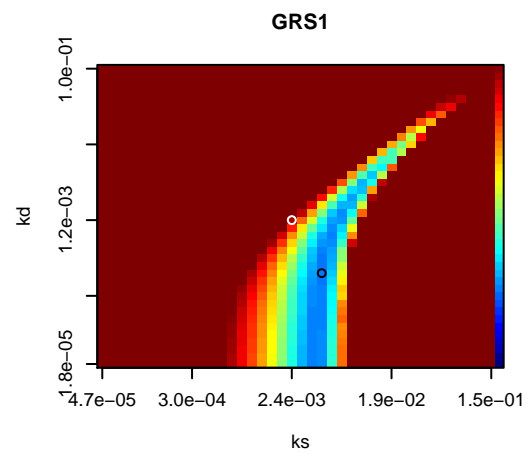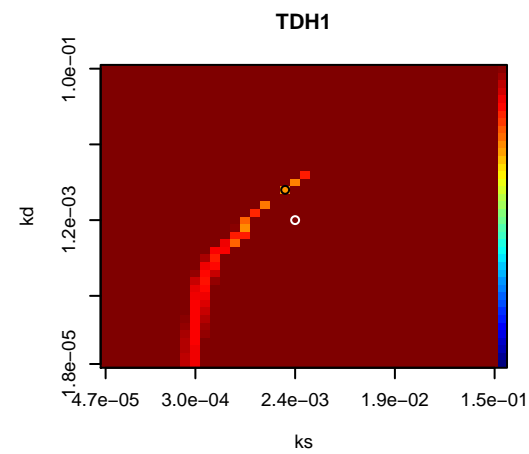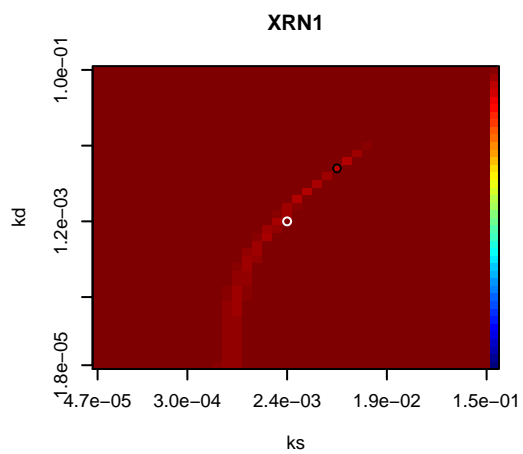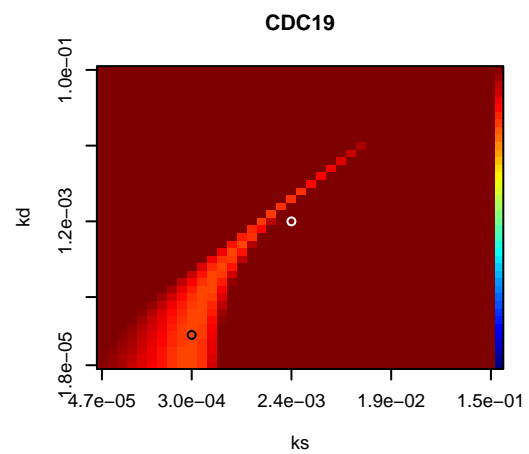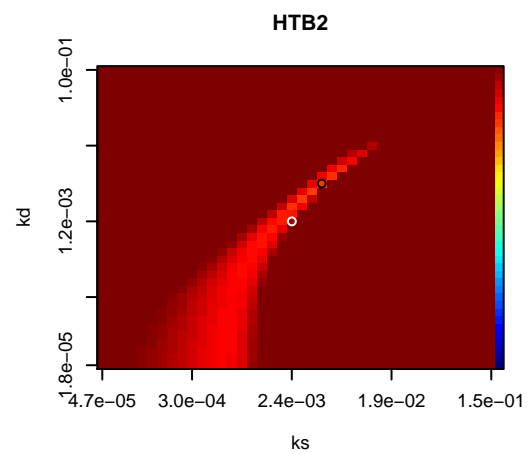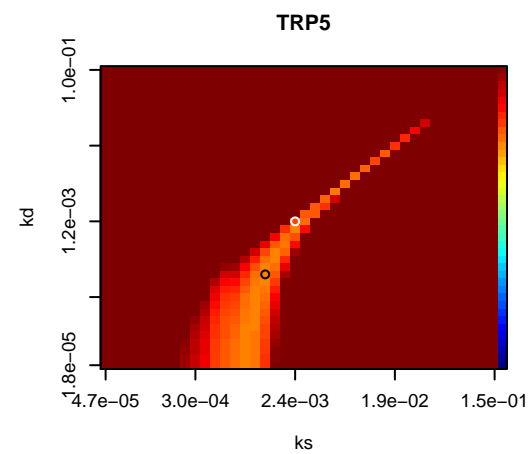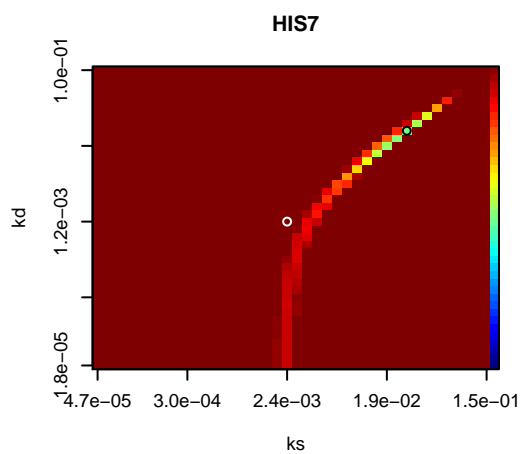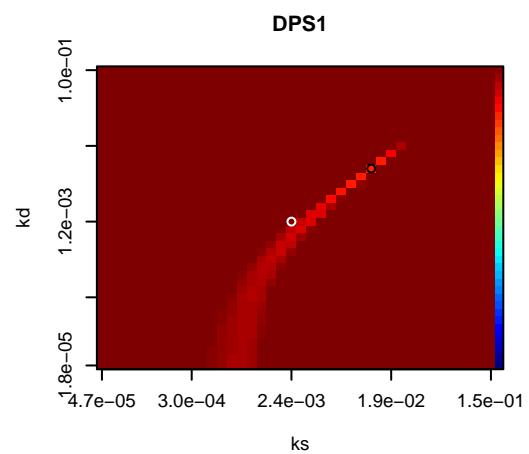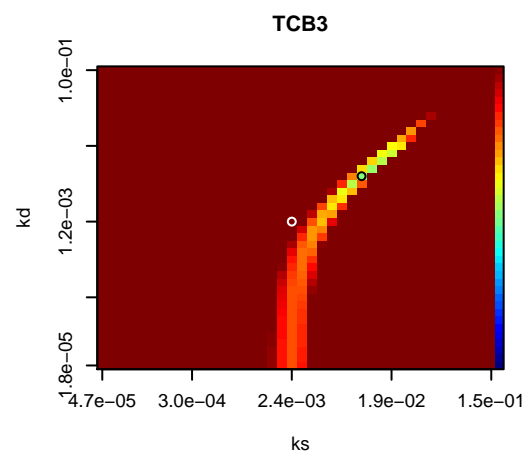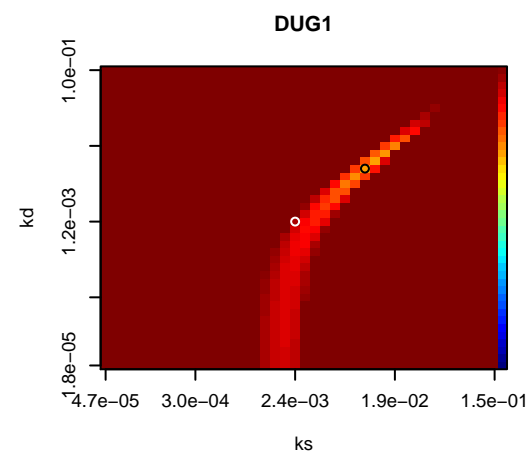

TUB2

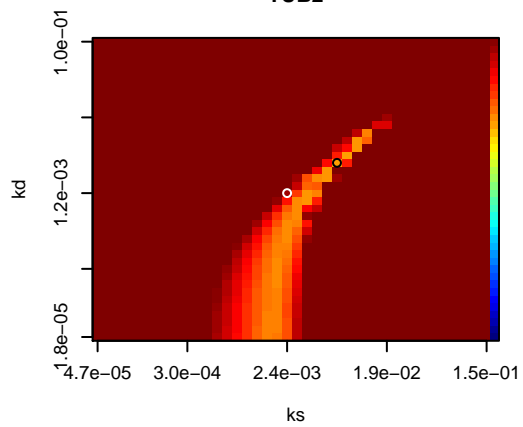

GSC2

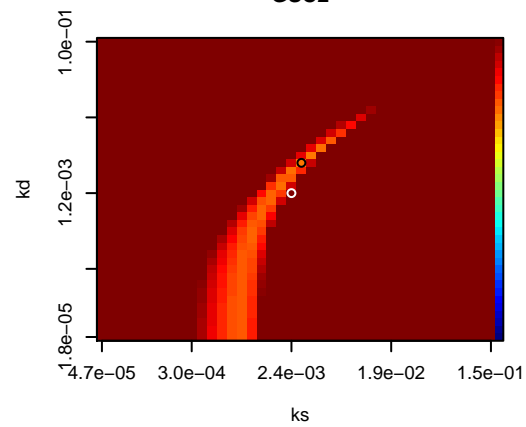

CDC48

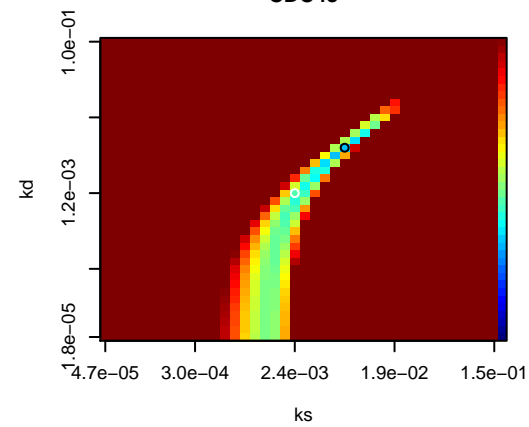

ACT1

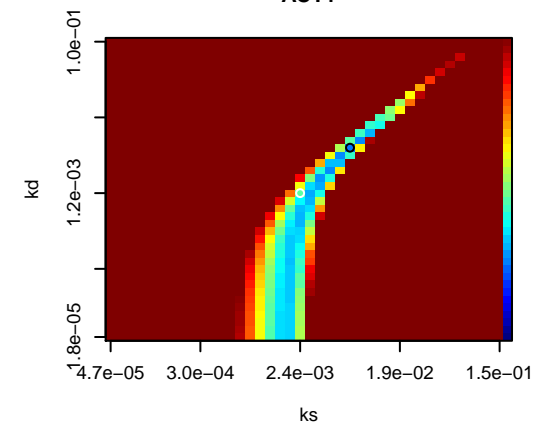

HSP82

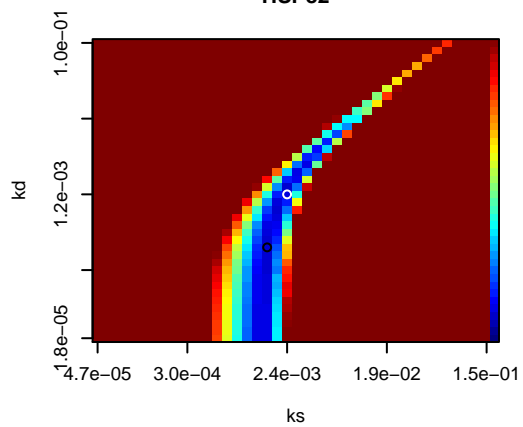

VMA2

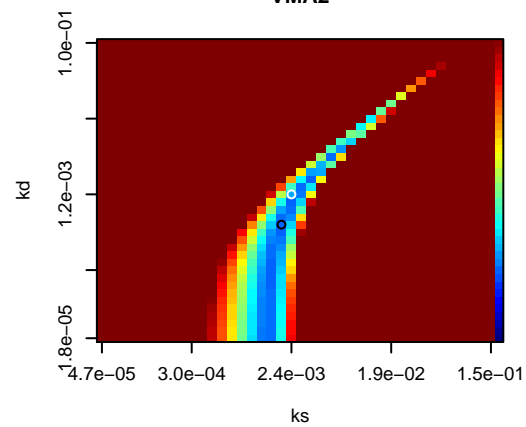

VAS1

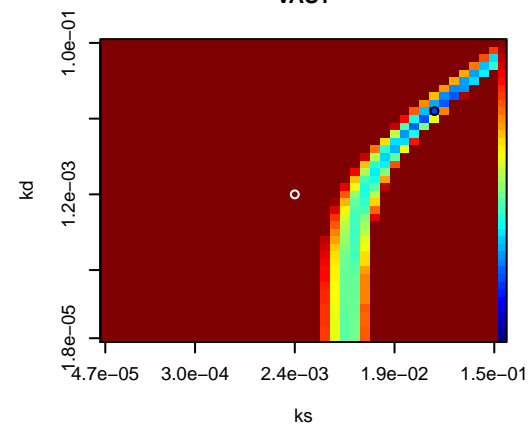

SSC1

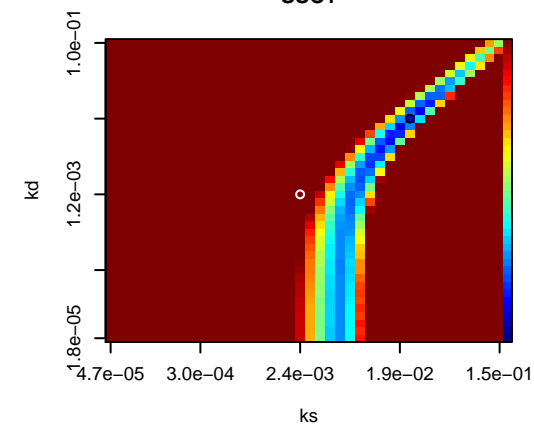

AHP1

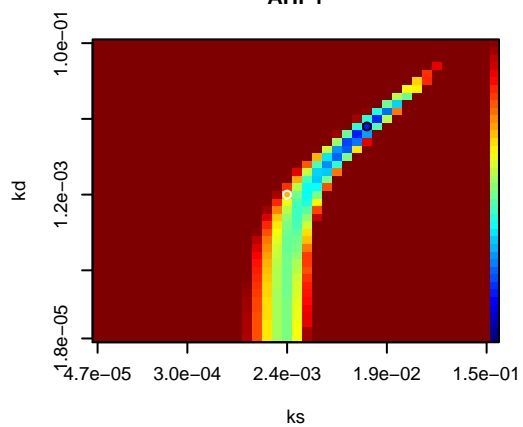

PYC2

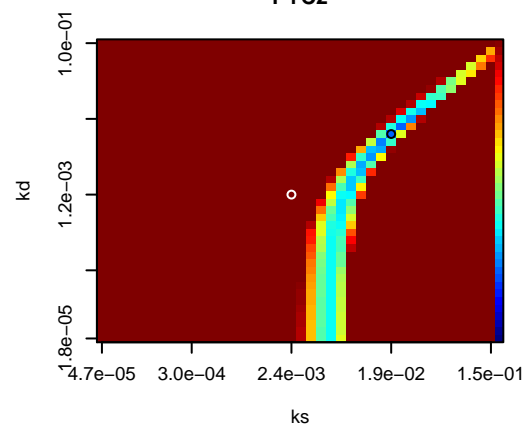

ZUO1

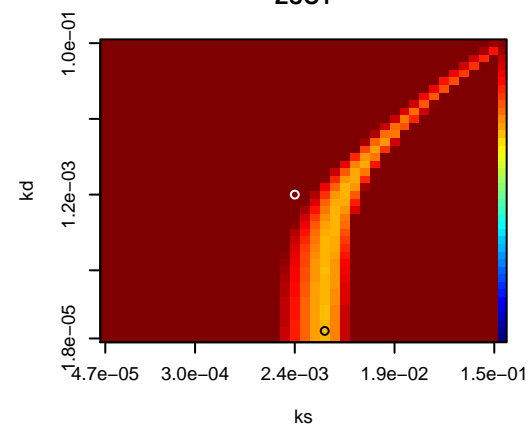

PDC6

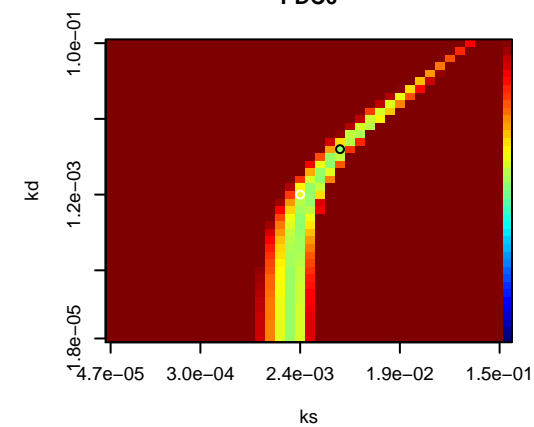



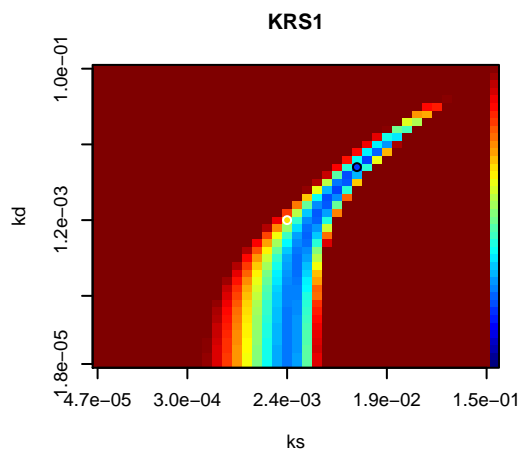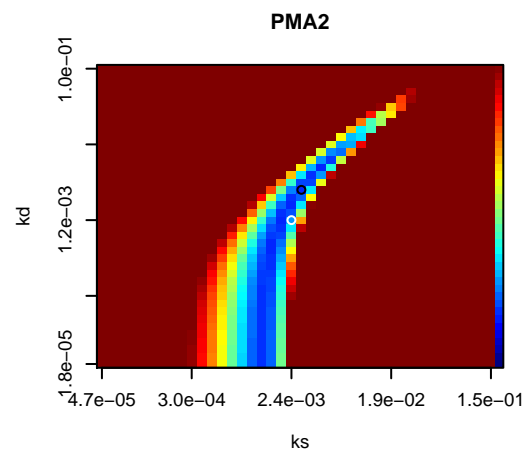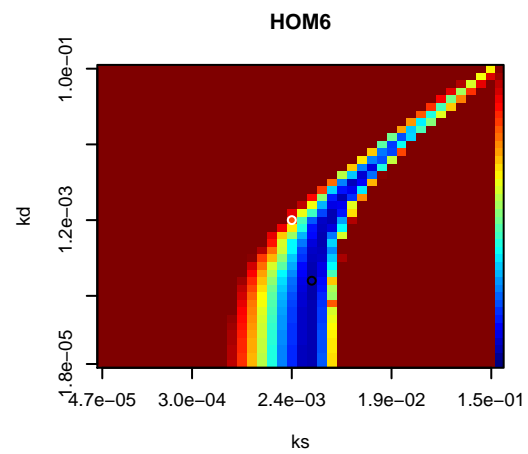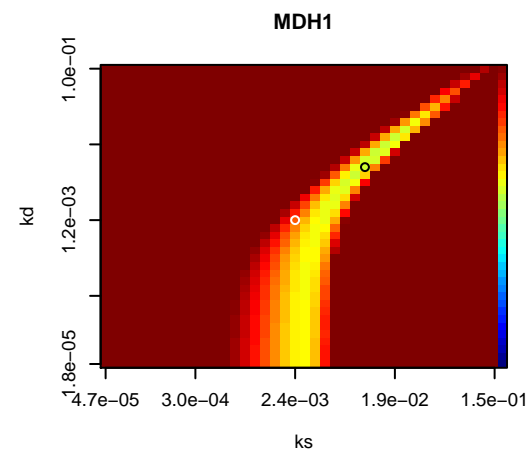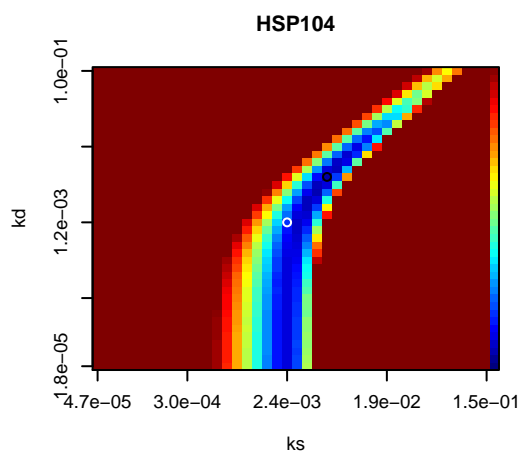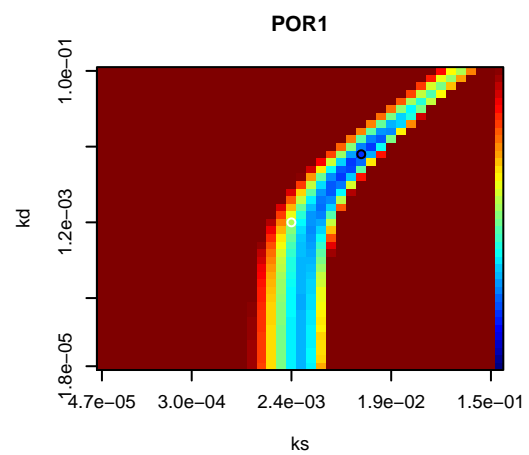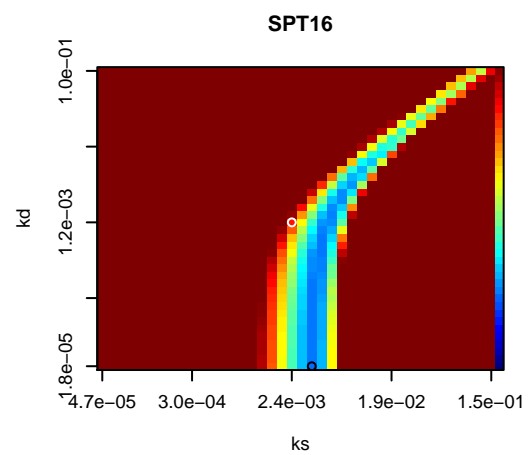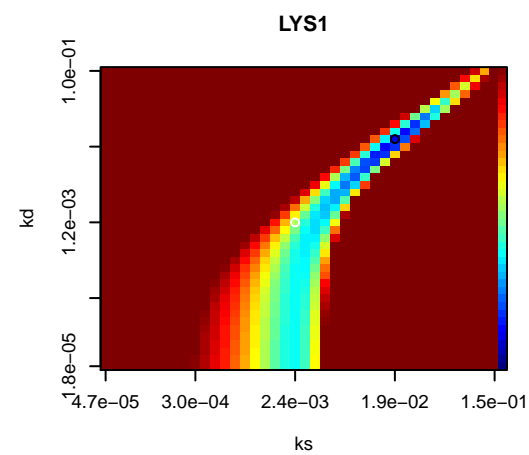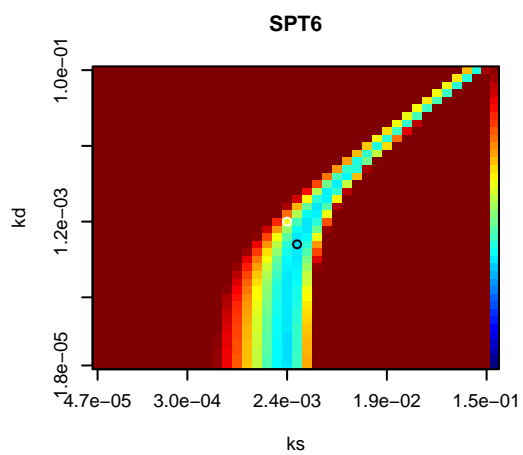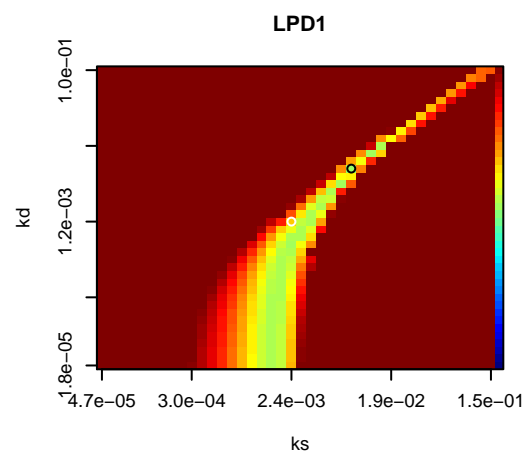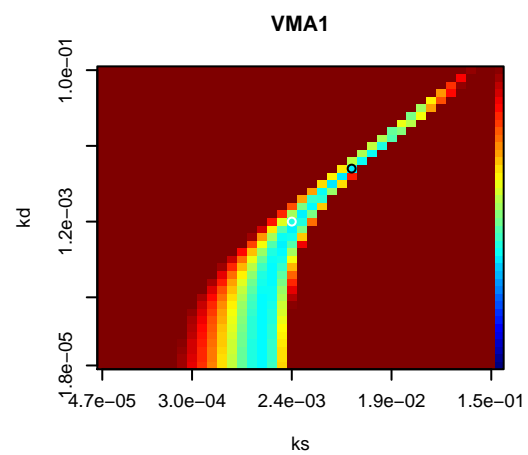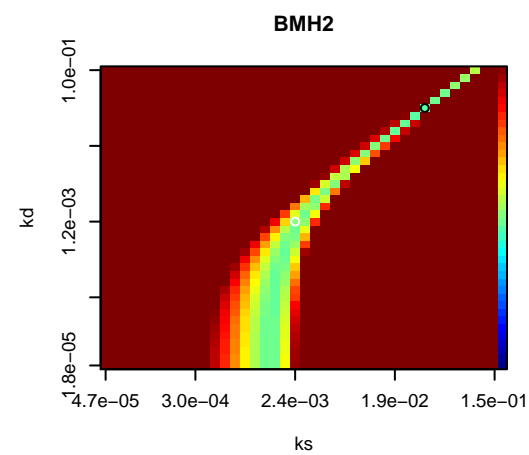

**VMA13**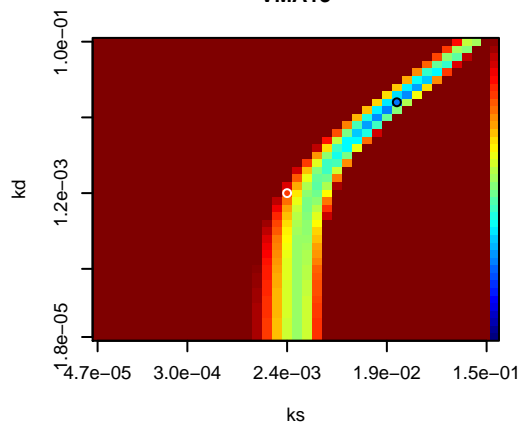**TYS1**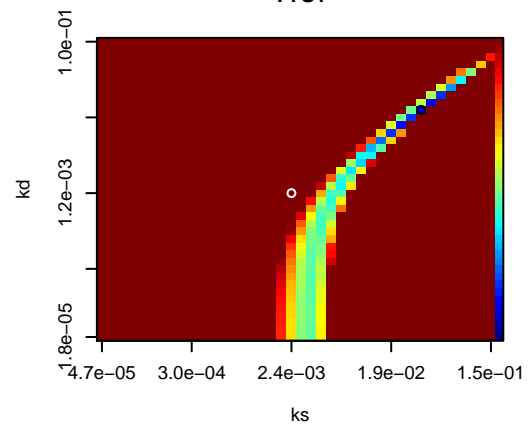**GCN1**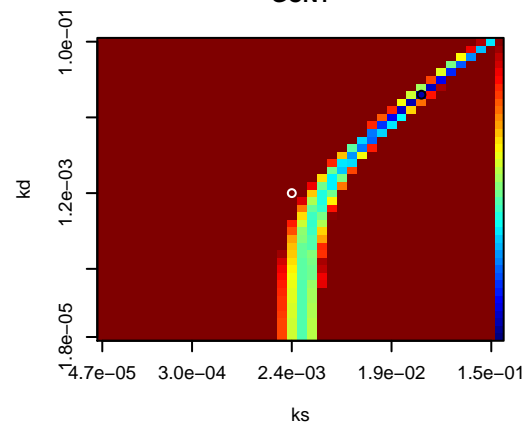

Supplement: c4mb00358f2.zip [file c4mb00358f2.zip]
