# Supplementary material for: One third of dynamic protein expression profiles can be predicted by a simple rate equation
Source: Royal Society of Chemistry journal article supplement (doi:10.1039/c4mb00358f), 2014-08-01

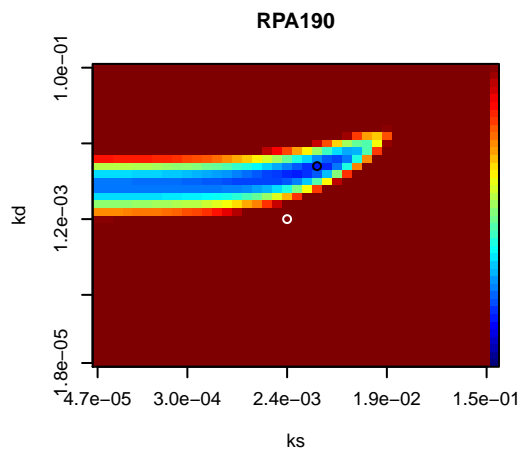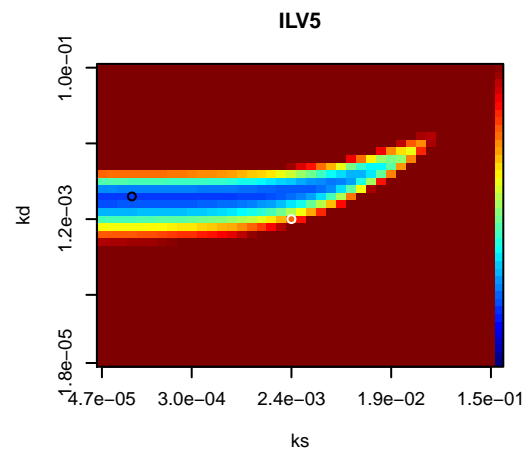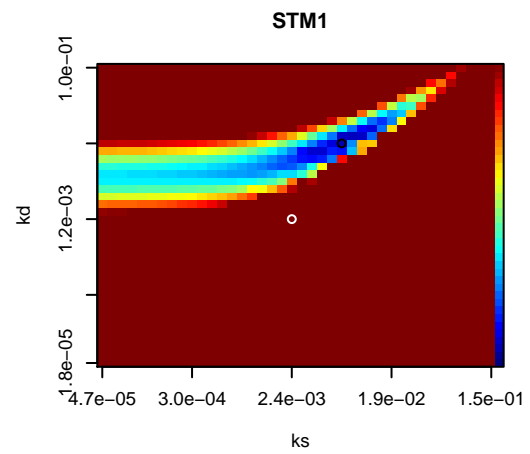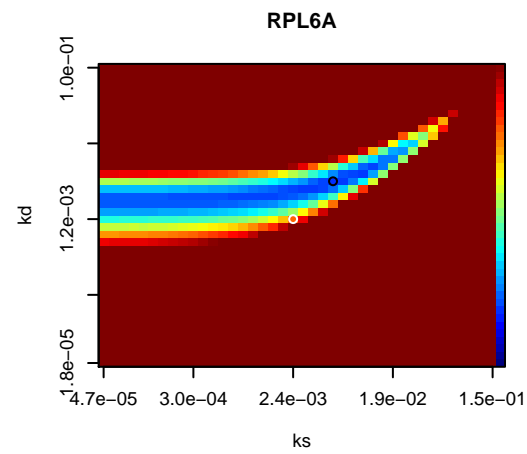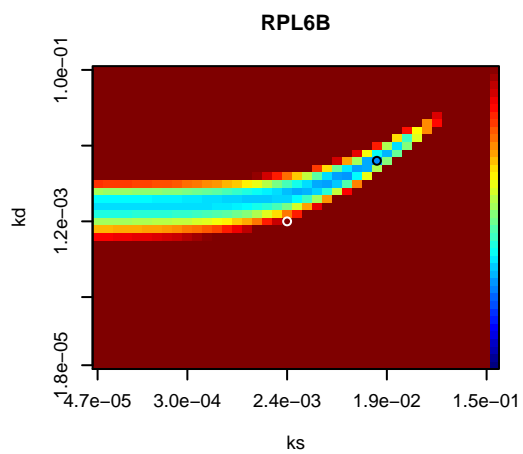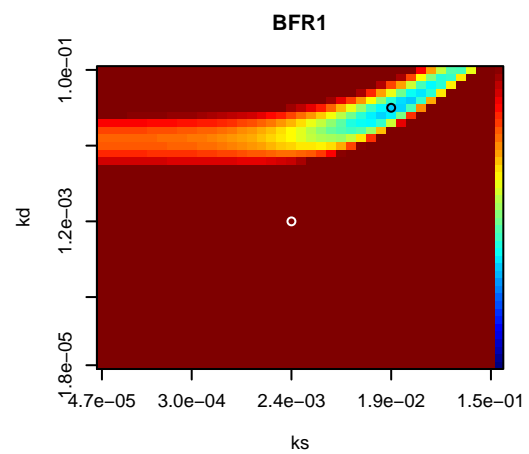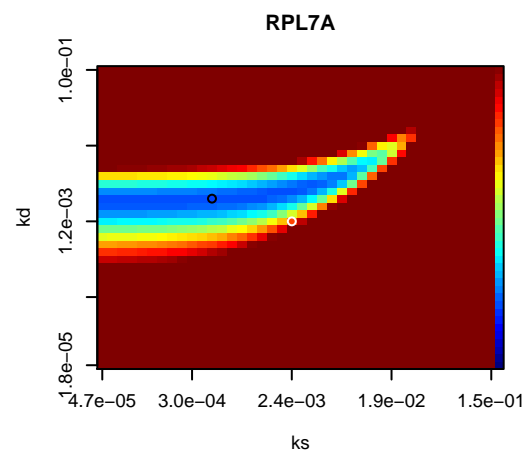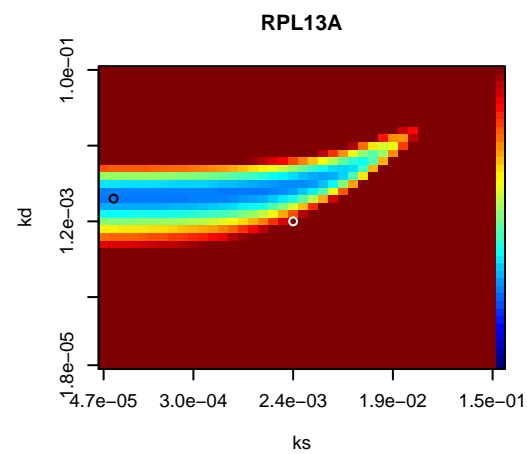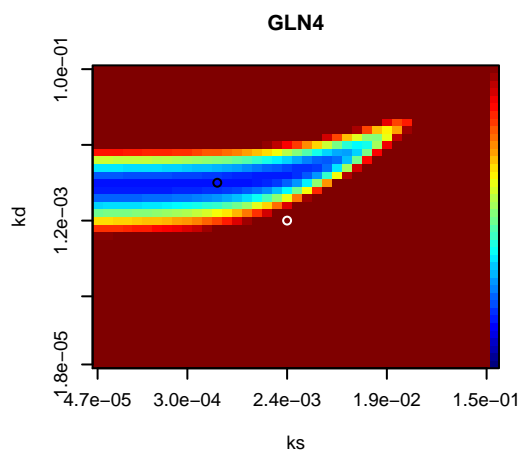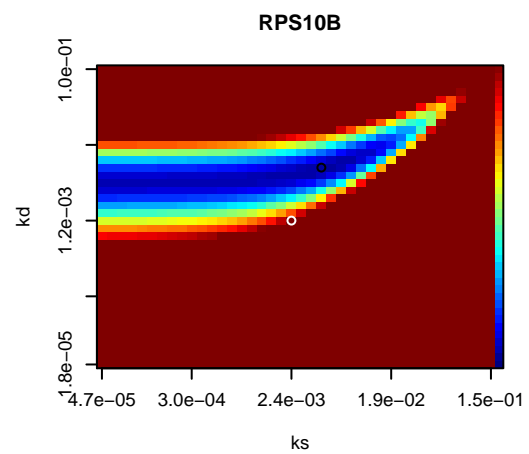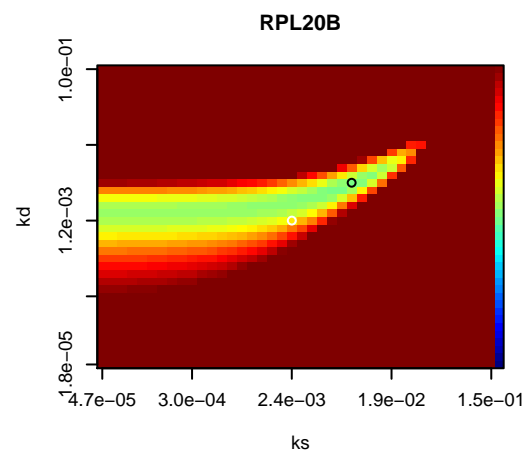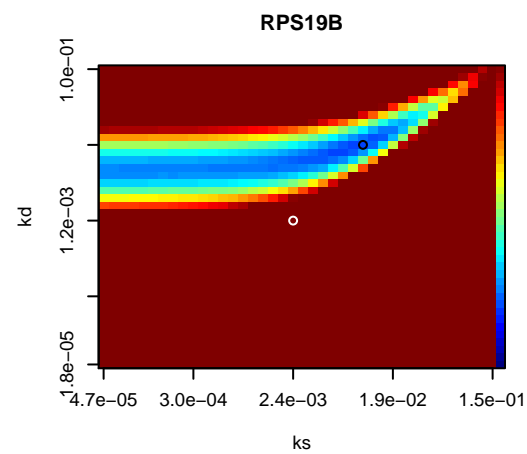

RPL12B

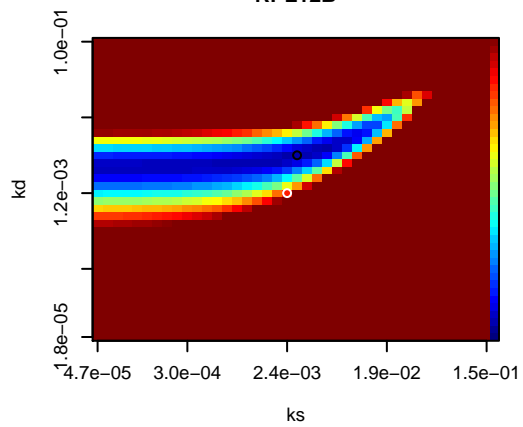

RPL22A

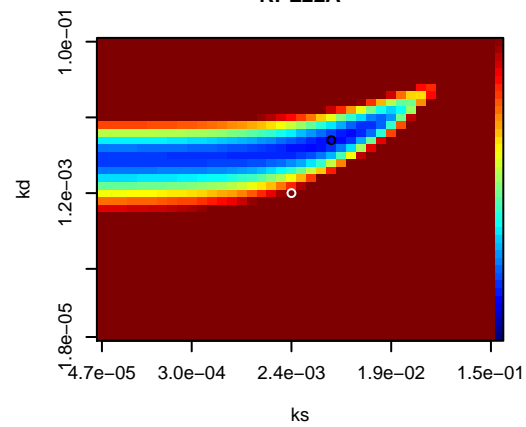

EFB1

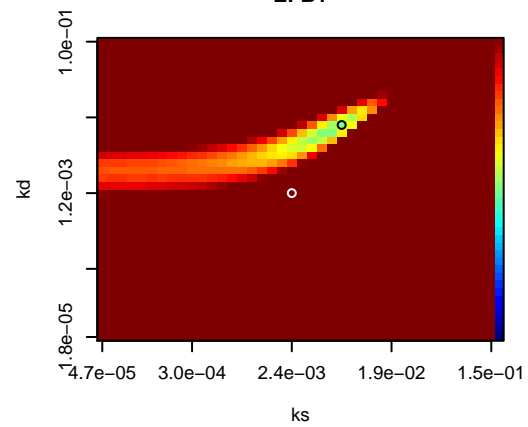

RPS5

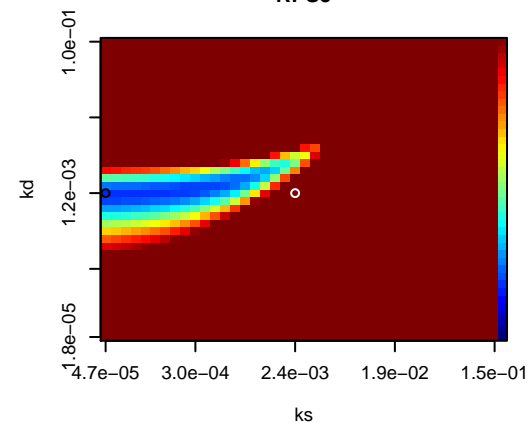

HIS4

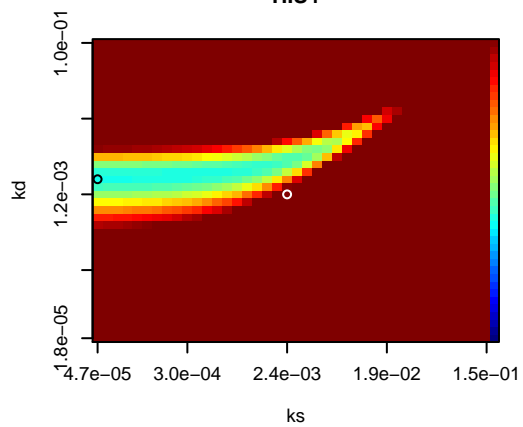

TIF4631

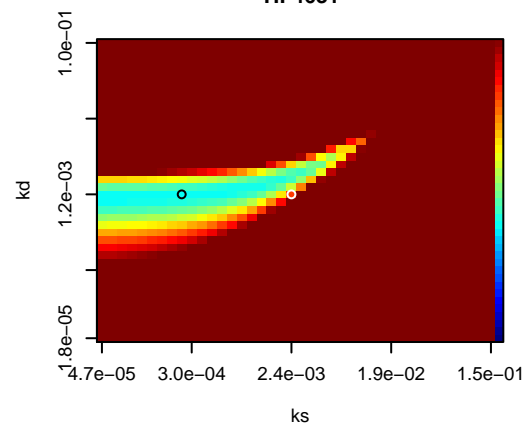

MET6

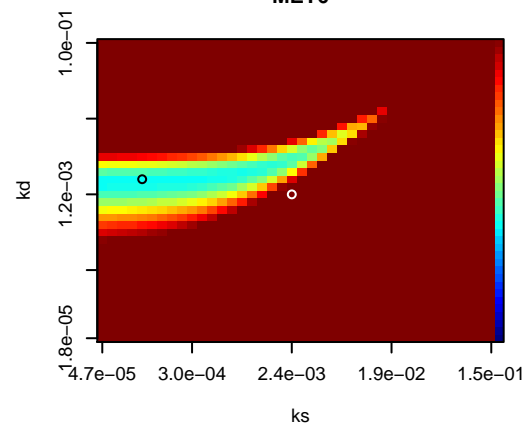

ADE13

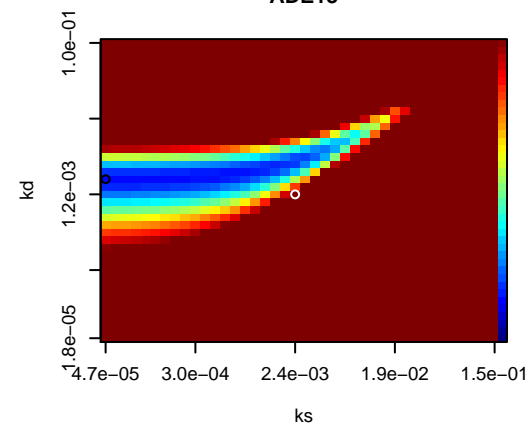

HIS1

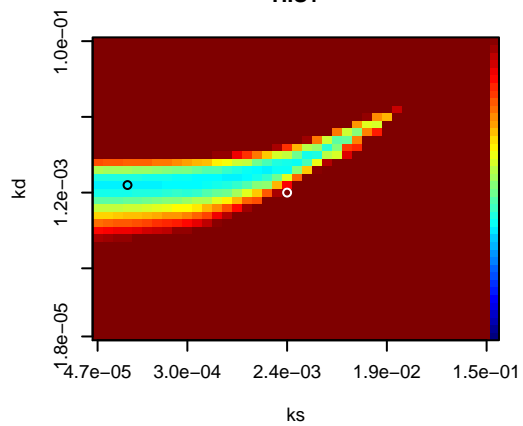

SEC23

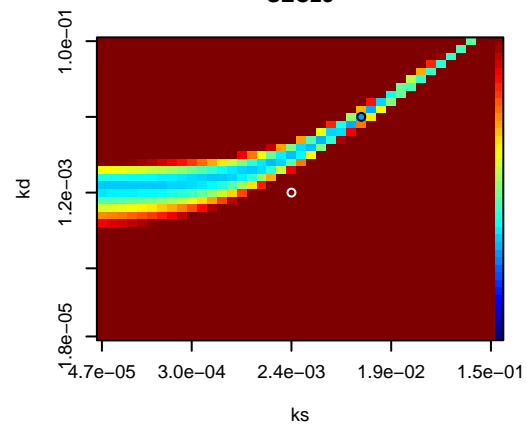

CDC33

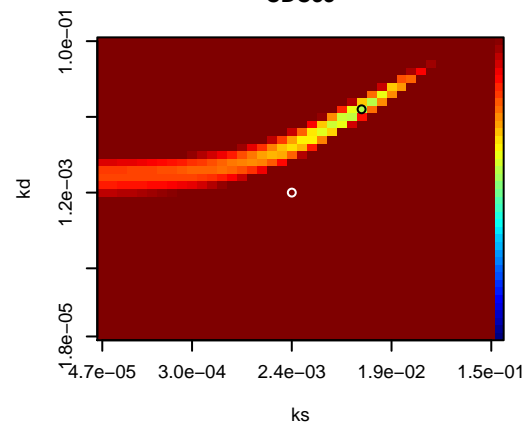

TSA1

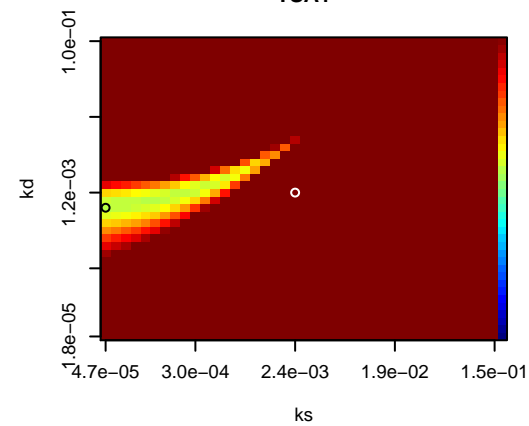

ENO1

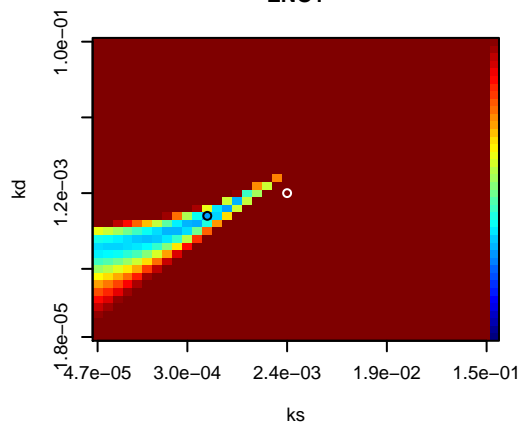

RPL14A

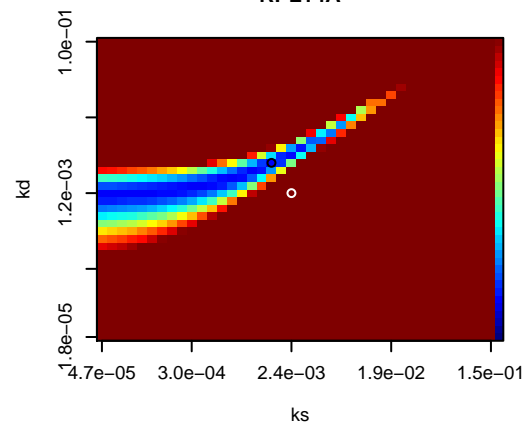

ADE3

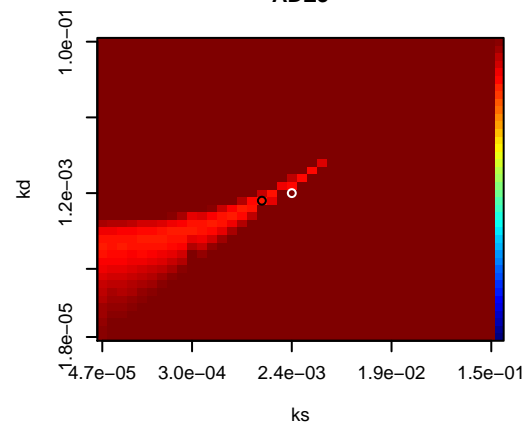

ARO8

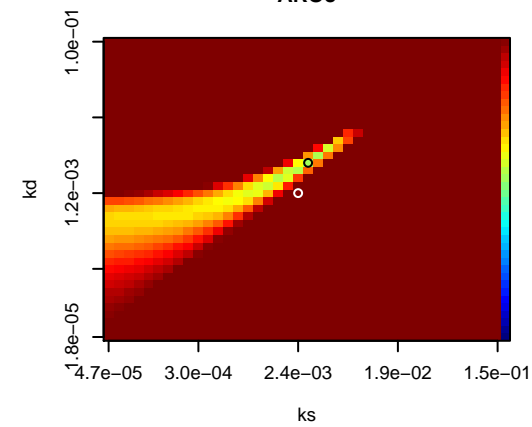

FBA1

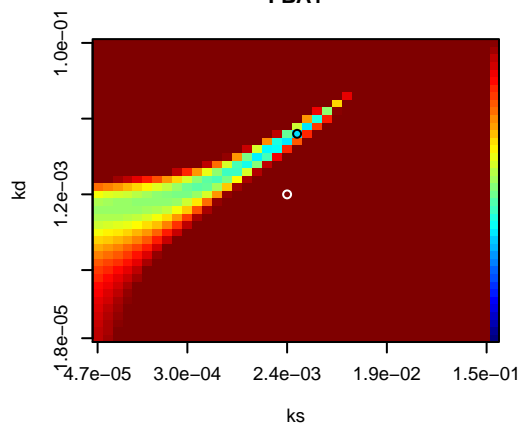

RPL10

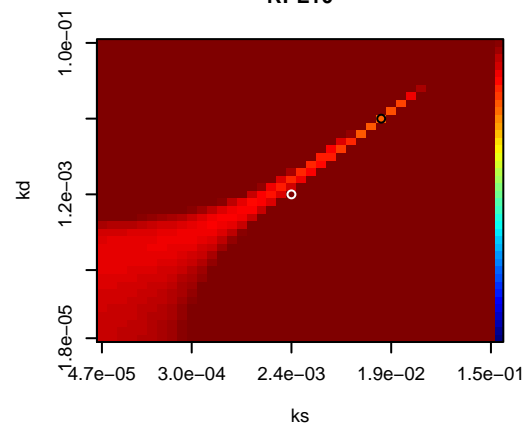

FAS2

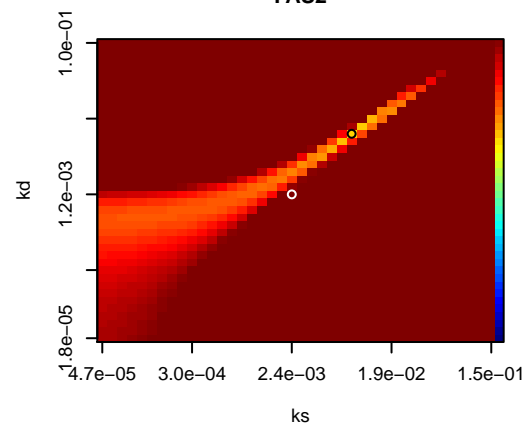

SHM2

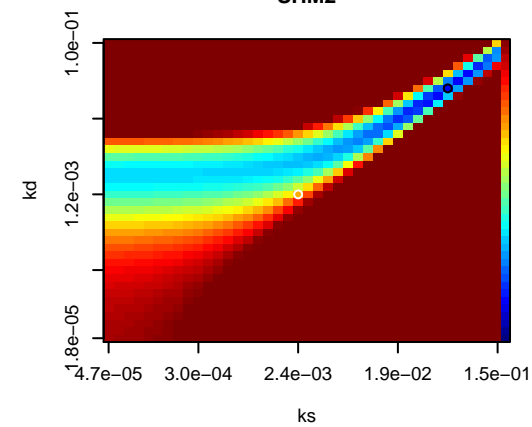

IMD3

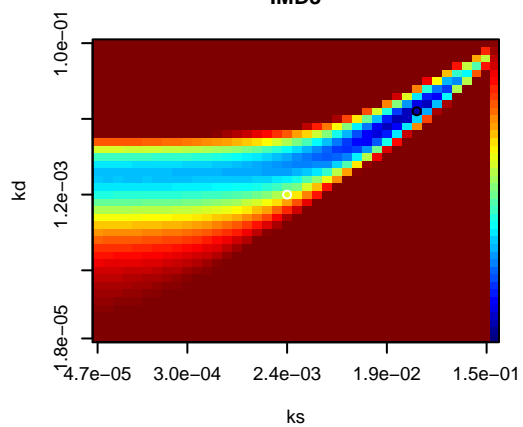

IMD2

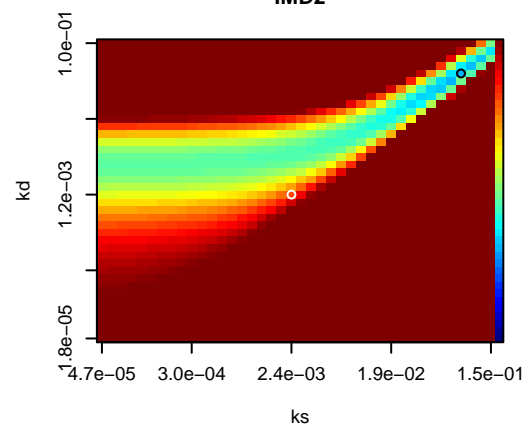

RPS11B

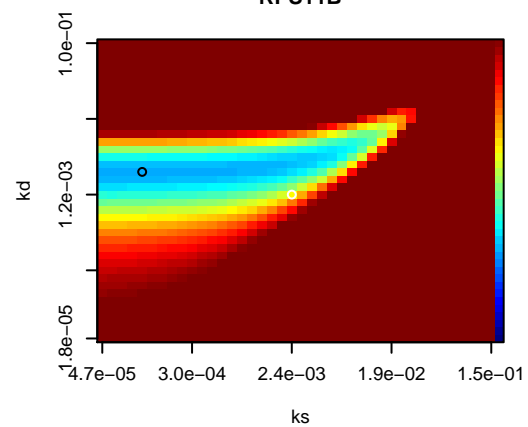

RPL3

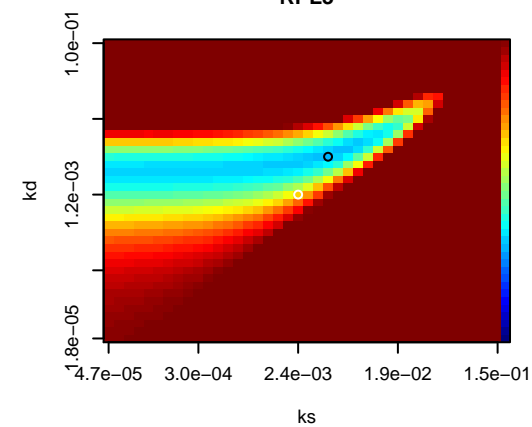

RPP0

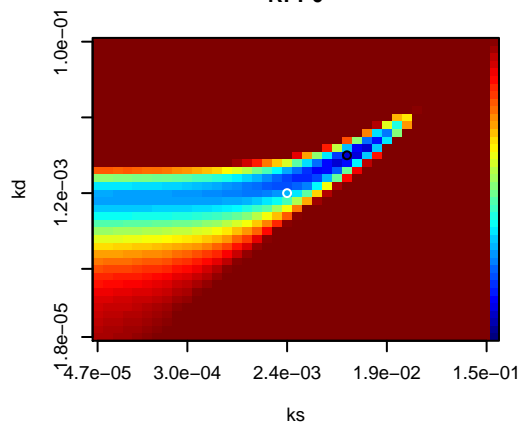

GCV2

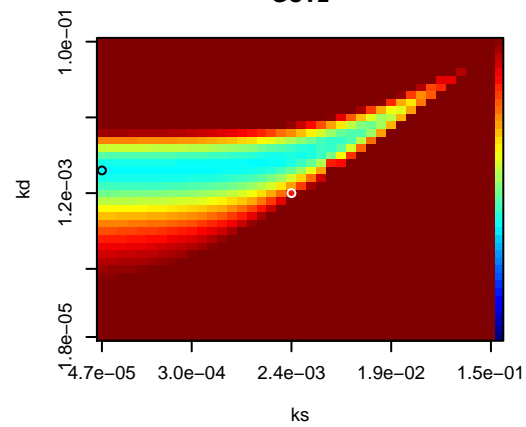

PDI1

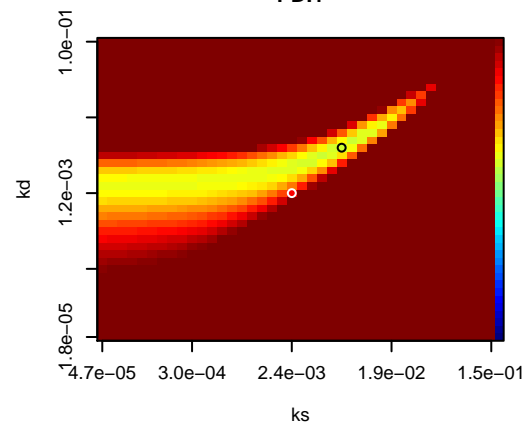

GLY1

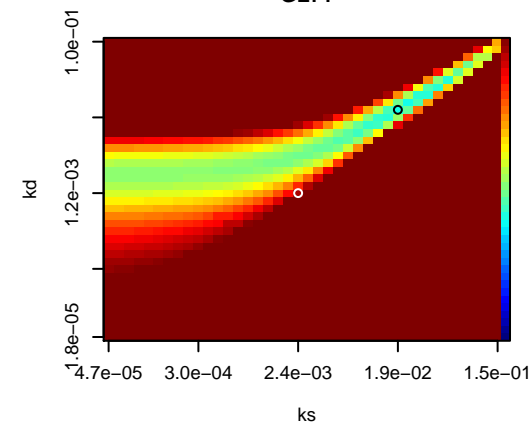

KAR2

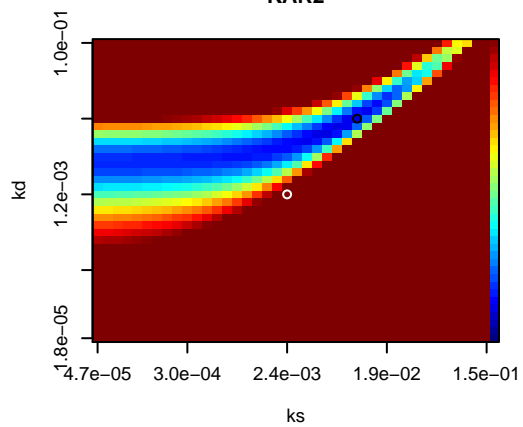

RPB2

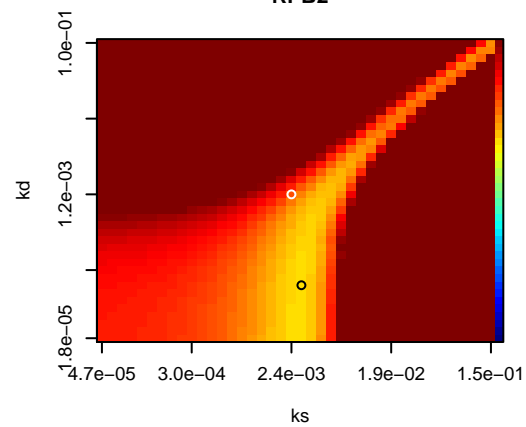

VMA4

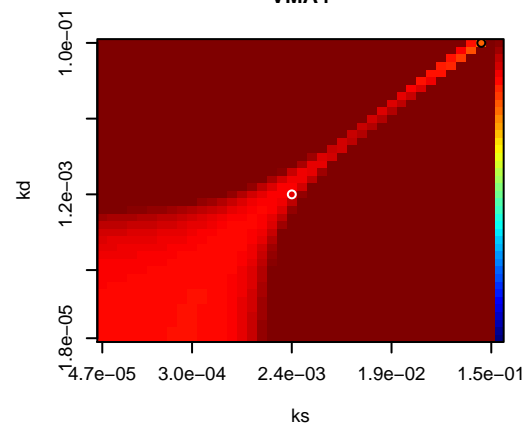

DED1

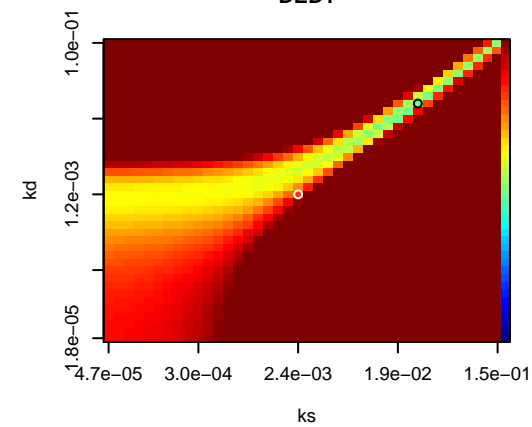

SAM1

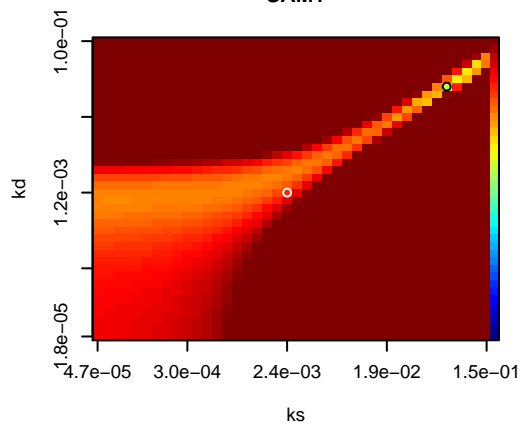

IMD4

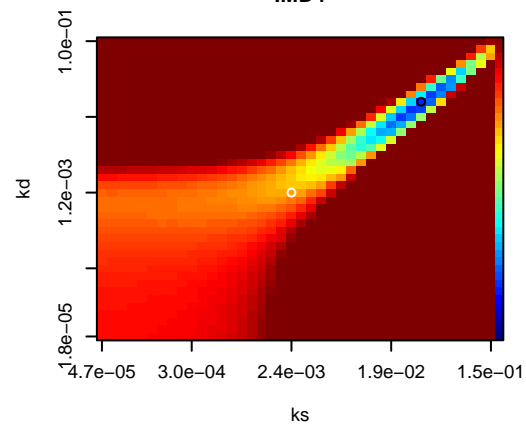

ADE16

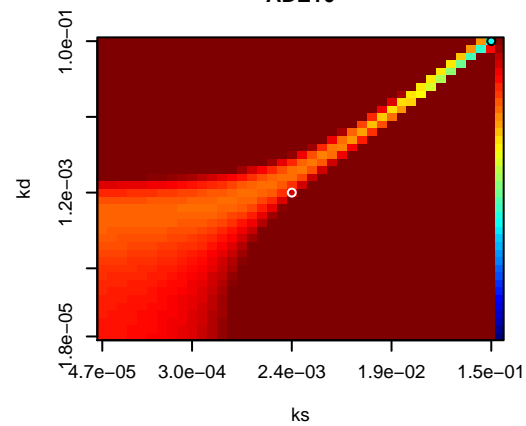

ADE17

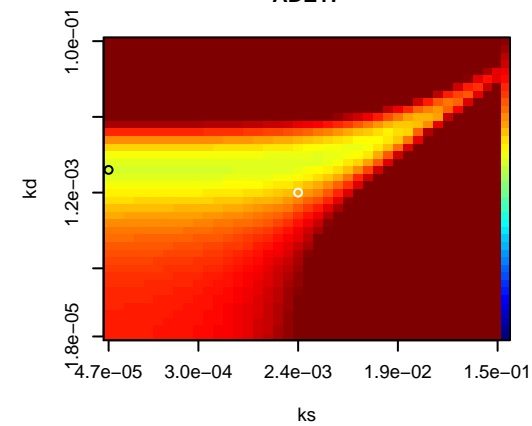

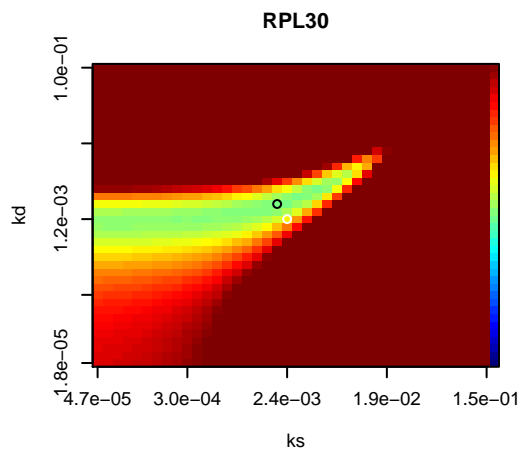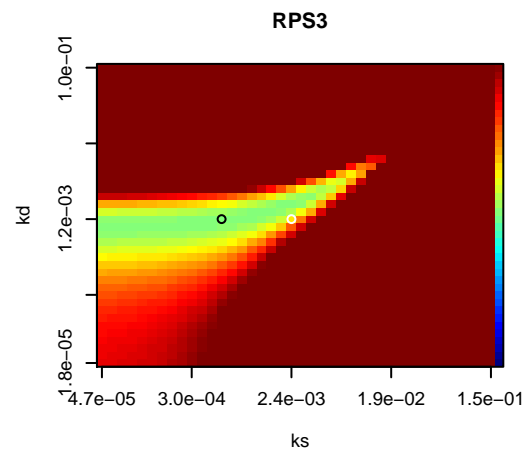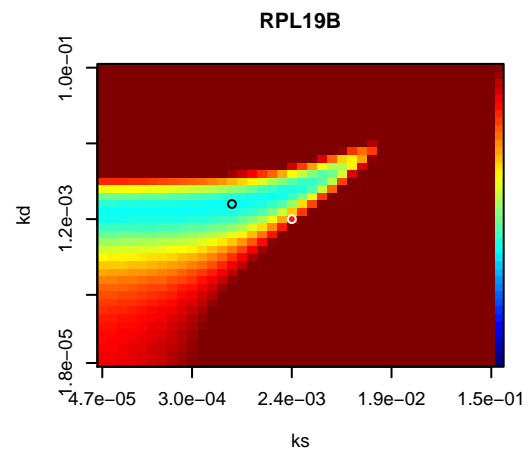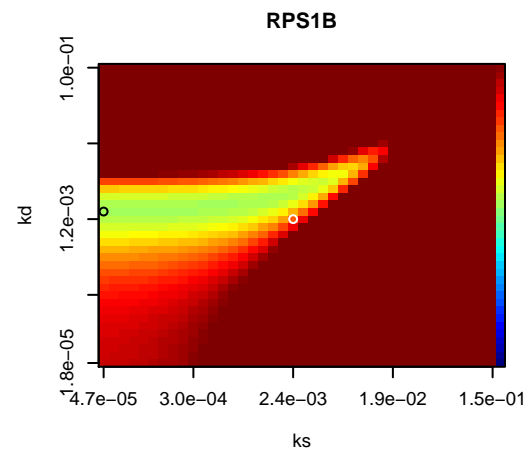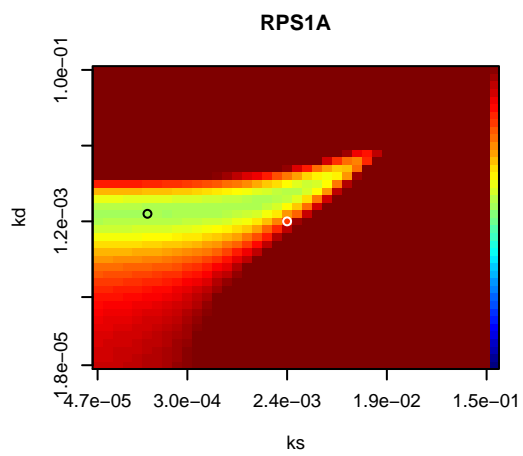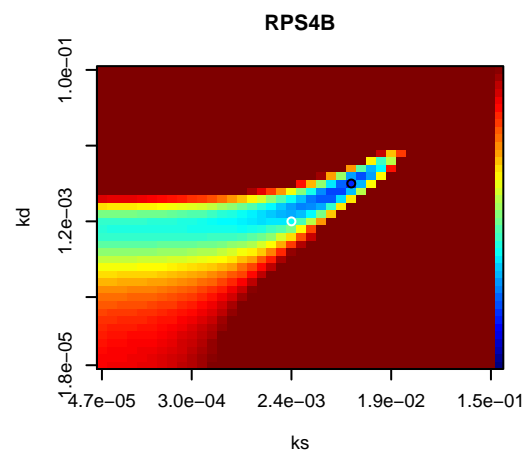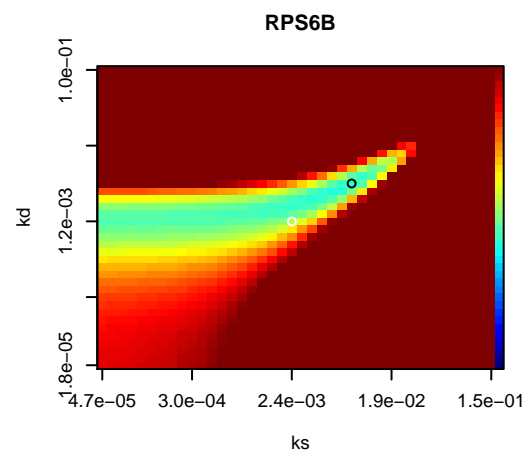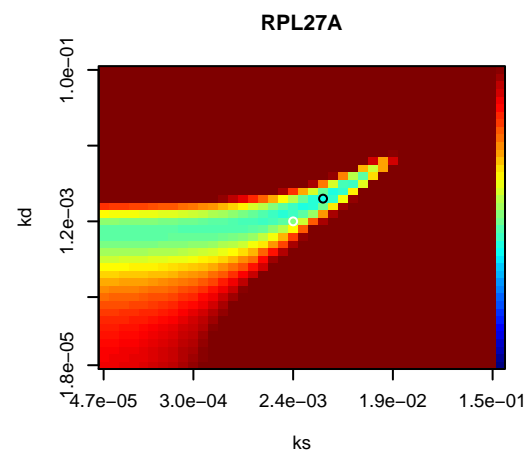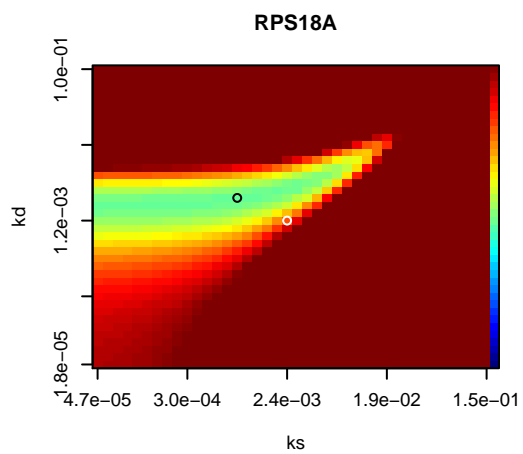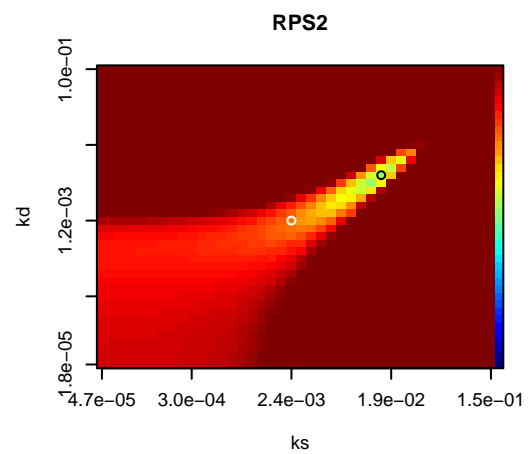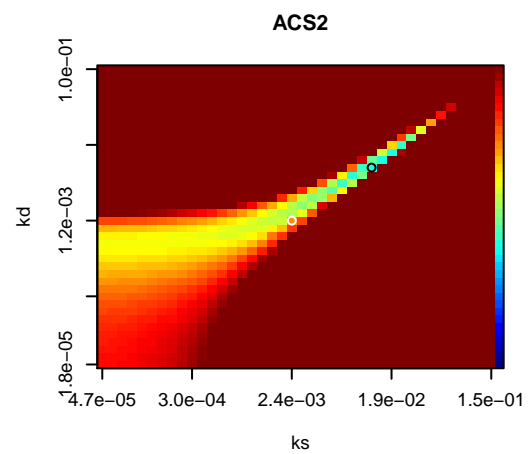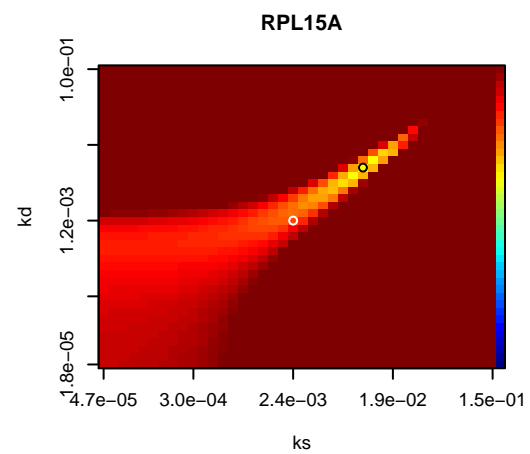

RPL5

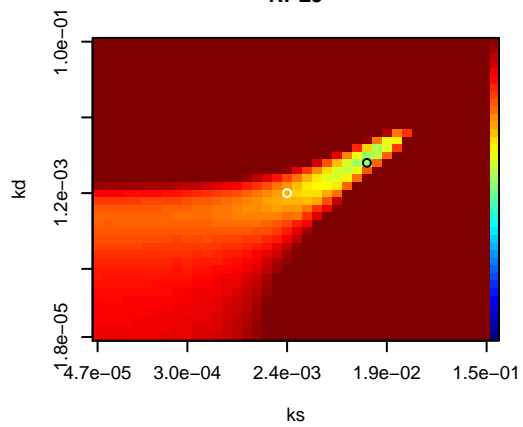

RPS15

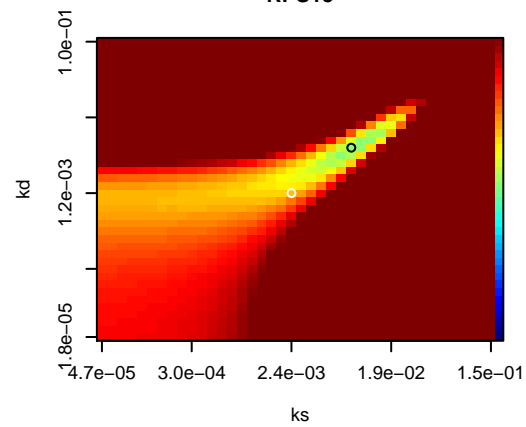

RPL4A

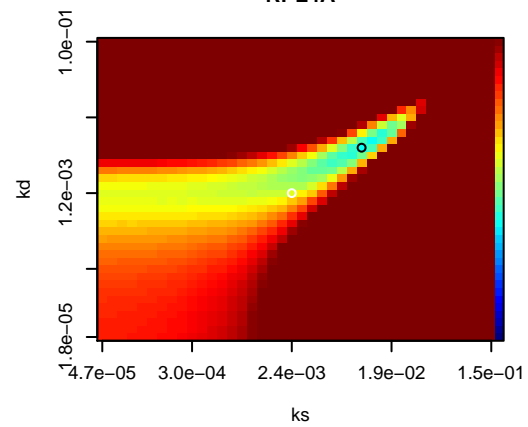

RPL4B

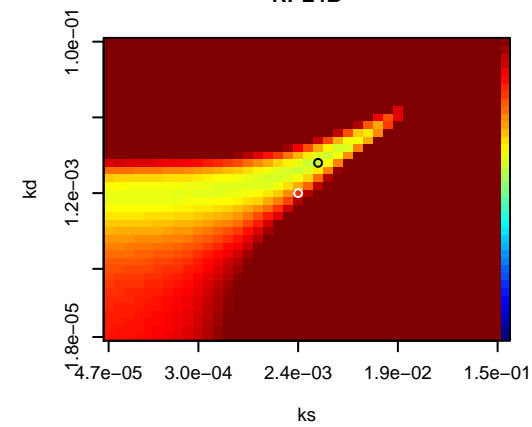

ADE5-7

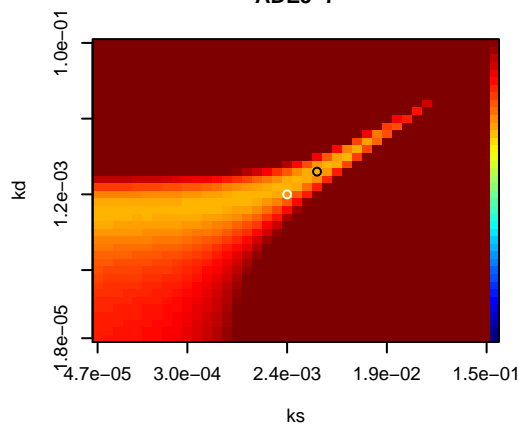

RPS14A

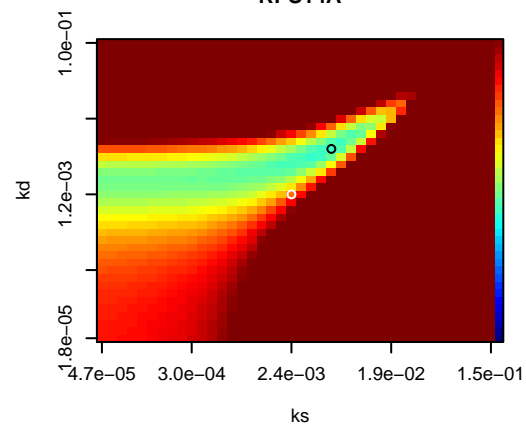

RPL2A

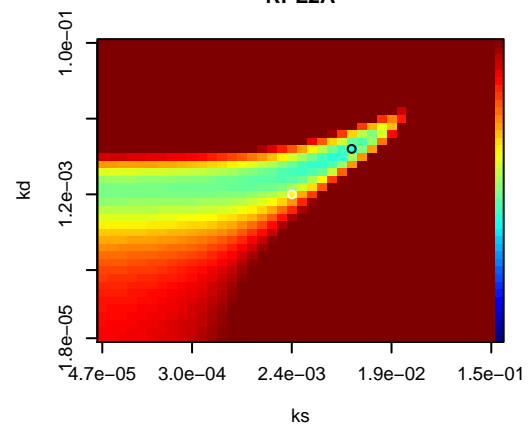

DED81

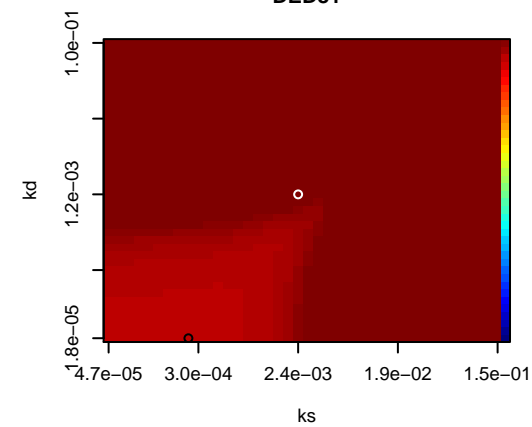

SCP160

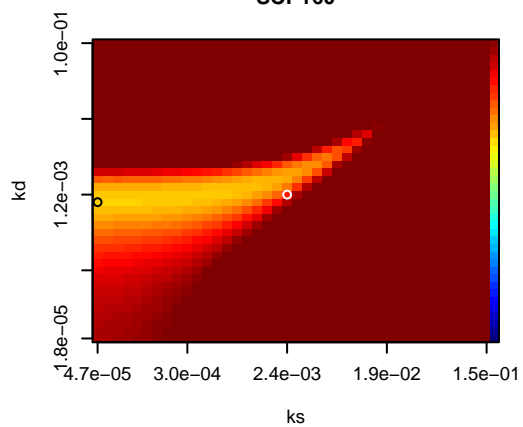

TEF4

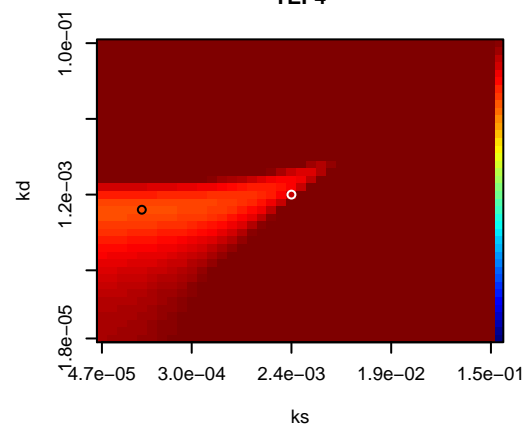

RPS8A

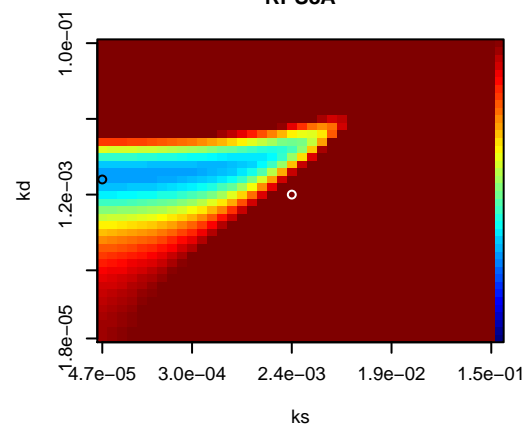

ERG10

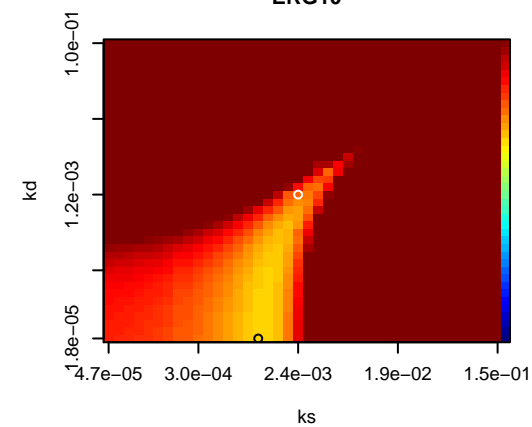

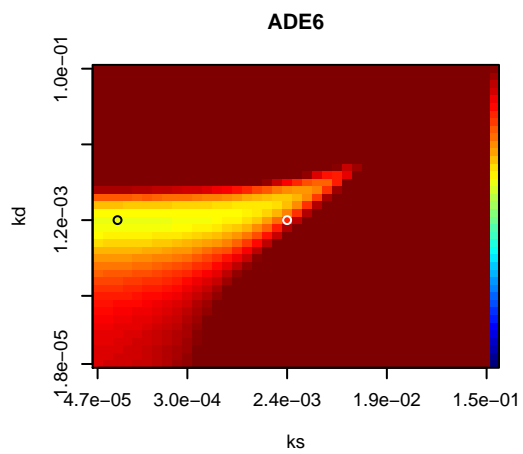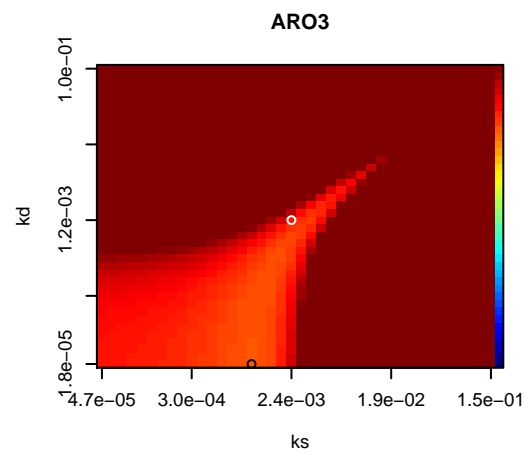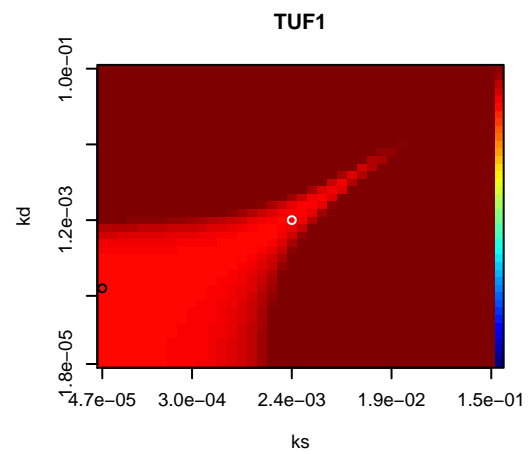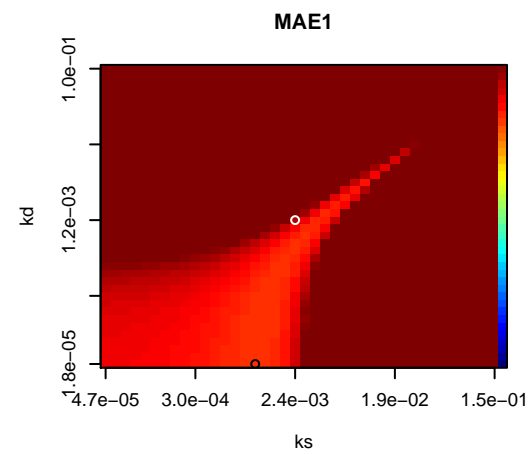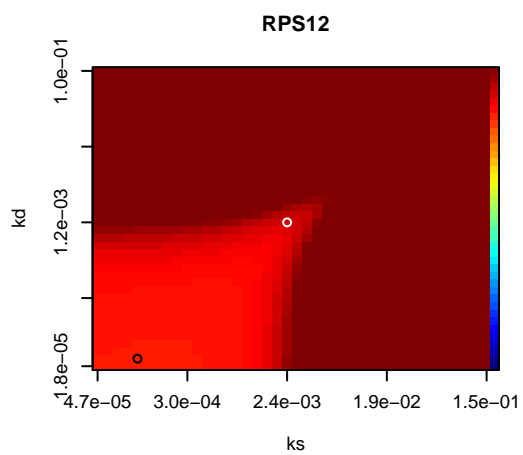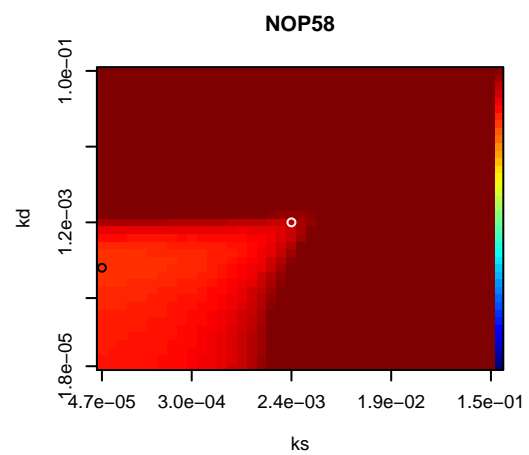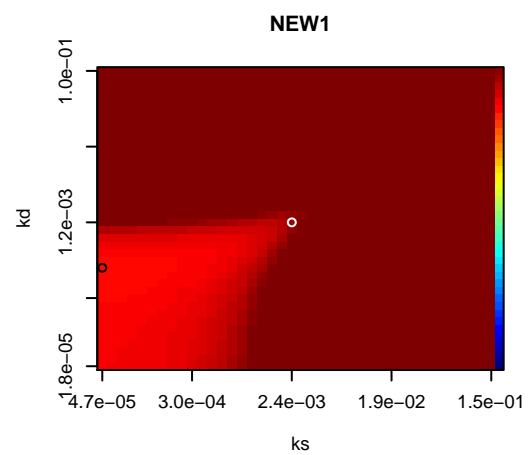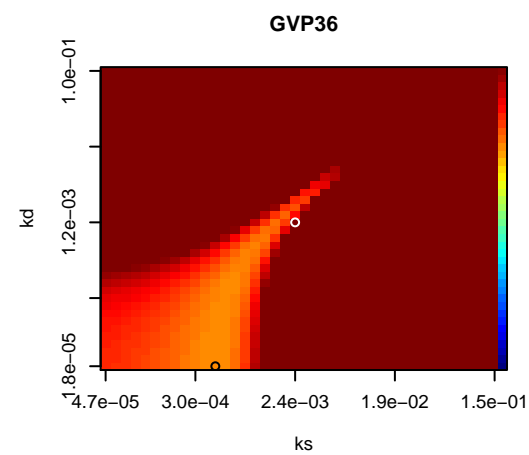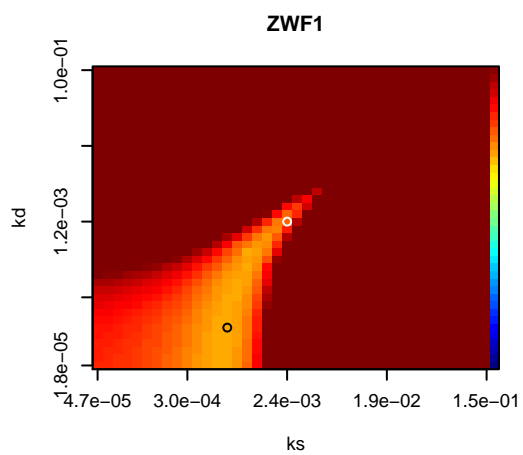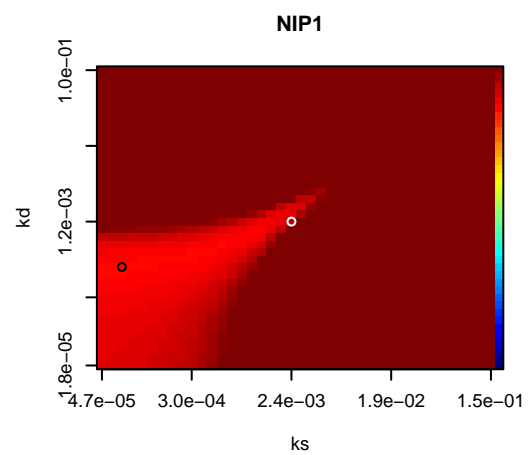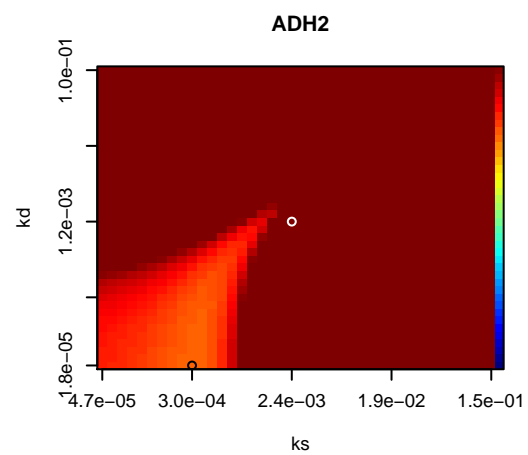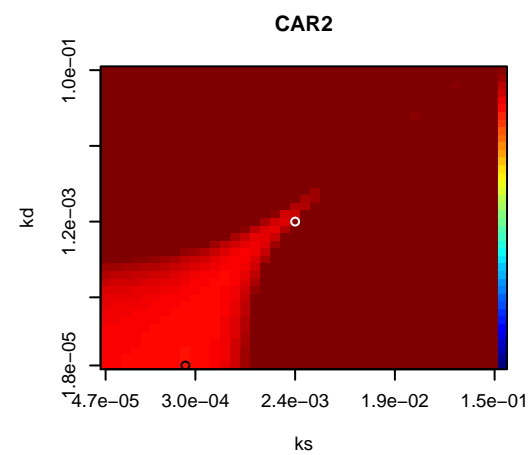

ABP1

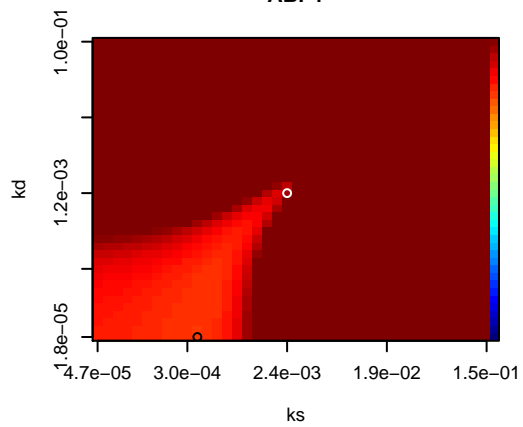

FAS1

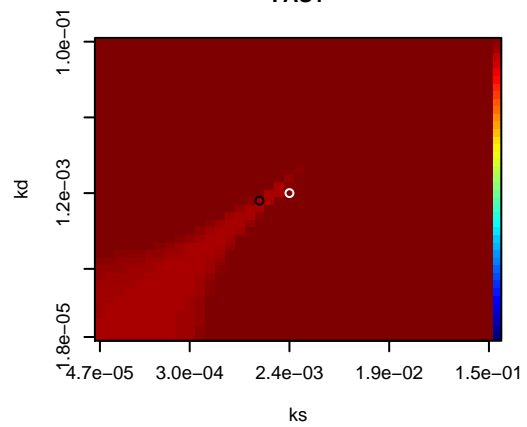

PGI1

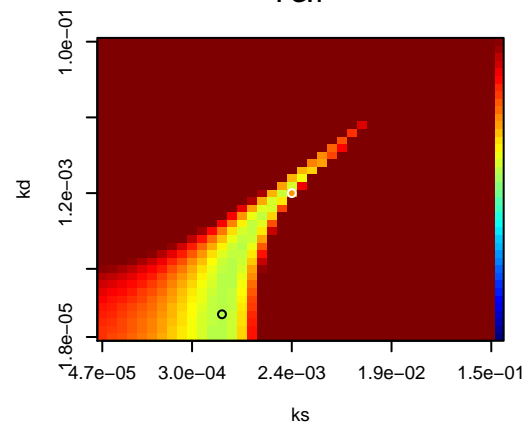

ADH1

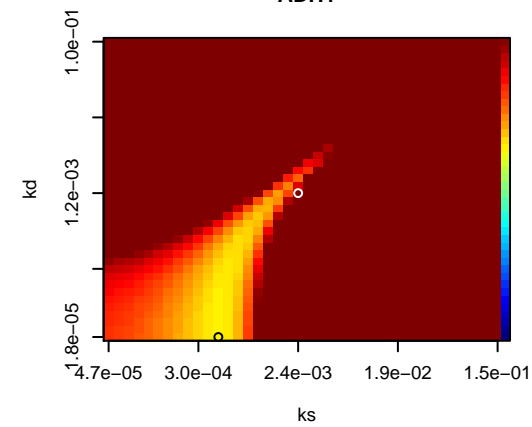

EGD2

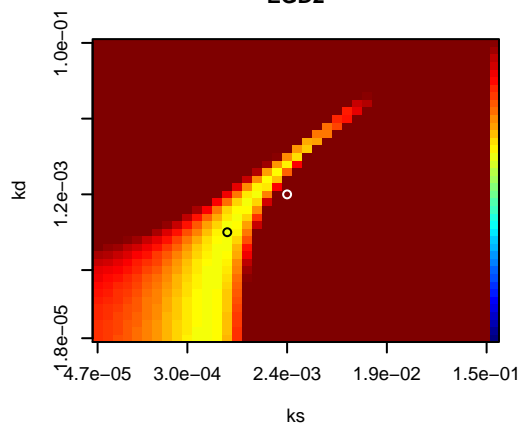

DBP5

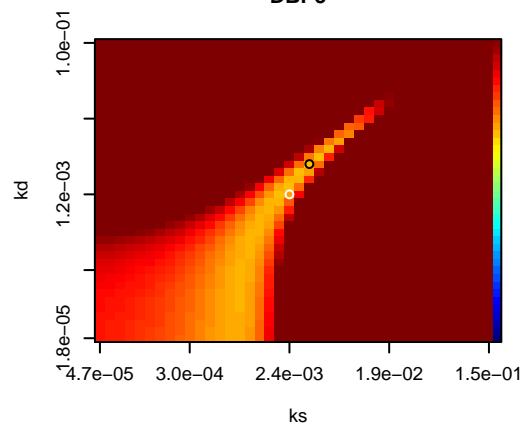

ATP2

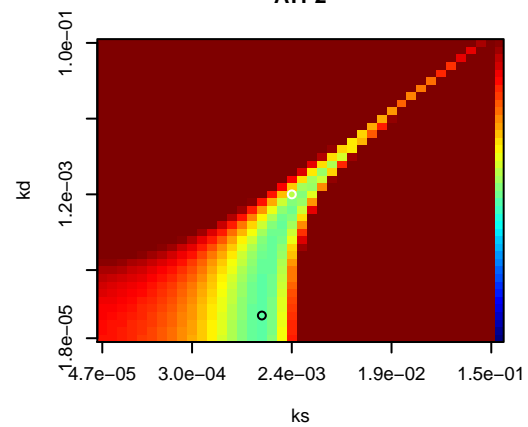

FRS1

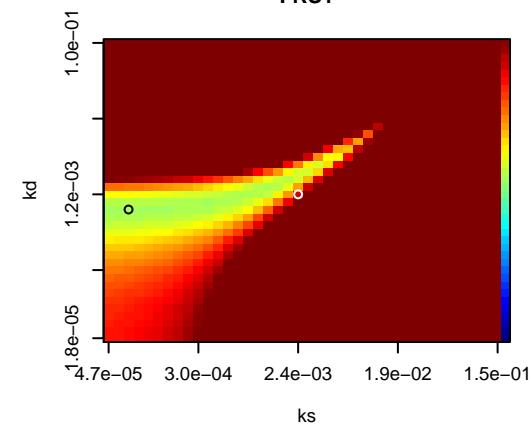

TIF5

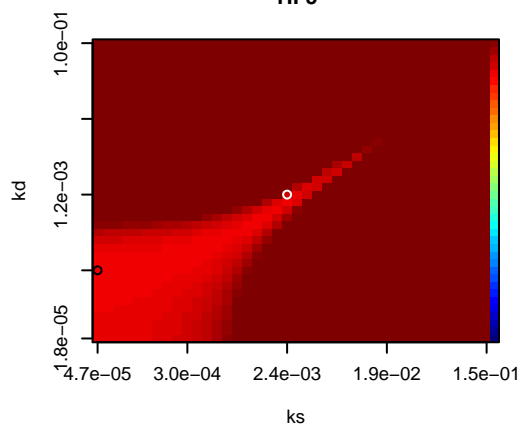

RPS0B

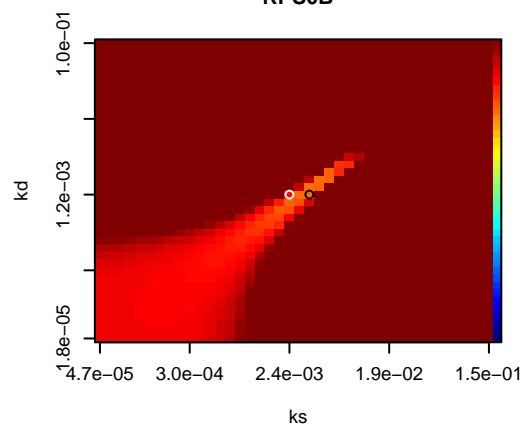

RPS0A

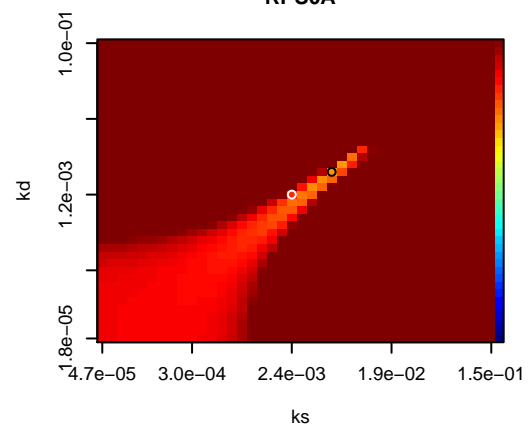

TPI1

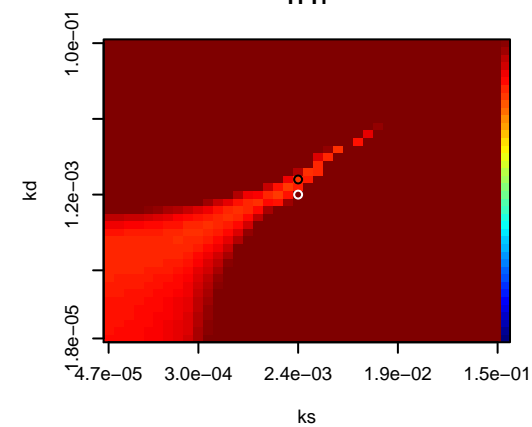



ARO4

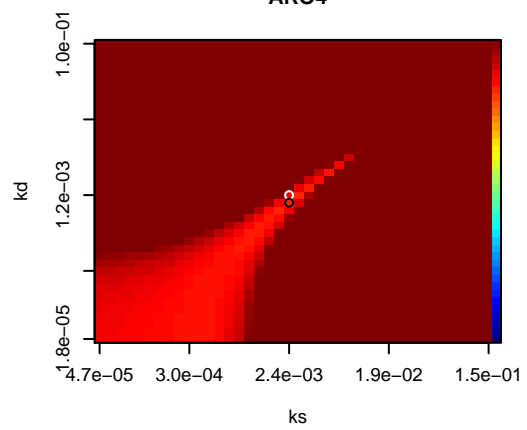

Supplement: c4mb00358f2.zip [file c4mb00358f2.zip]
