# Supplementary material for: One third of dynamic protein expression profiles can be predicted by a simple rate equation
Source: Royal Society of Chemistry journal article supplement (doi:10.1039/c4mb00358f), 2014-08-01

HTB2

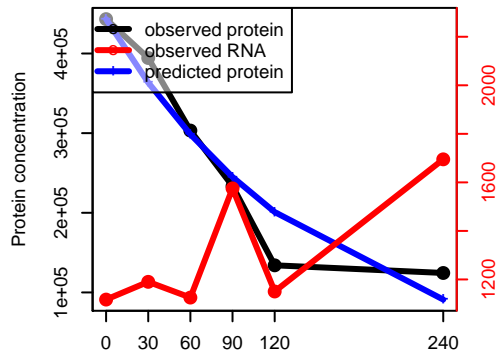

Time (min)  
ks = 0 kd = 0.00660123884318591

NCL1

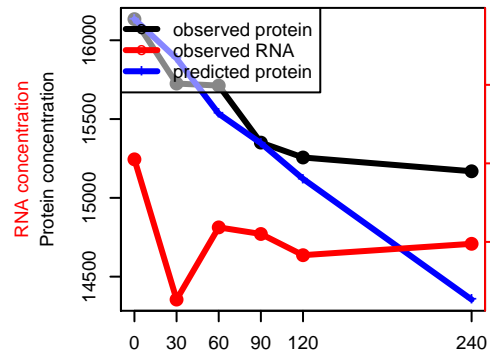

Time (min)  
ks = 0.55784076663133 kd = 0.00339644835633058

URA7

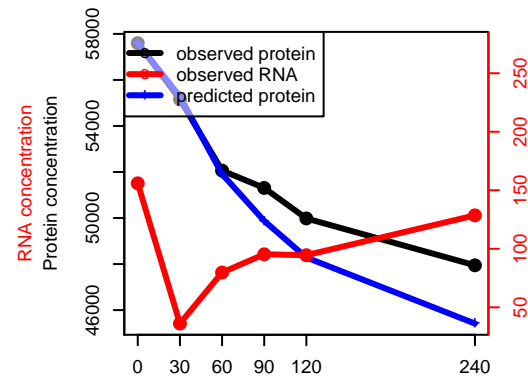

Time (min)  
ks = 1.19580403264957 kd = 0.00339644835633058

PHO88

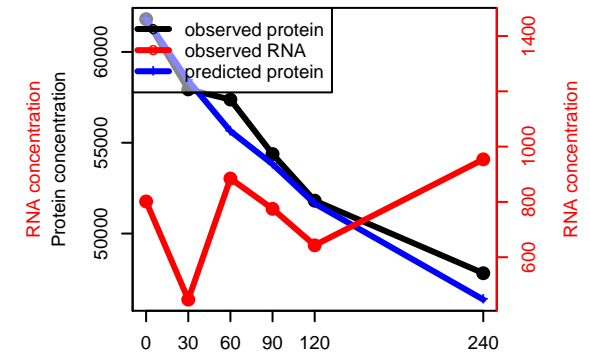

Time (min)  
ks = 0.150458675567012 kd = 0.00339644835633058

CNS1

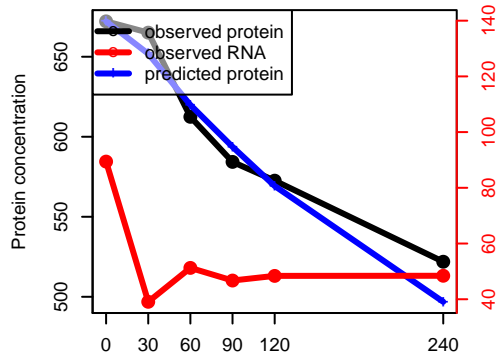

Time (min)  
ks = 0.025989594686592 kd = 0.00353477332270056

ILV6

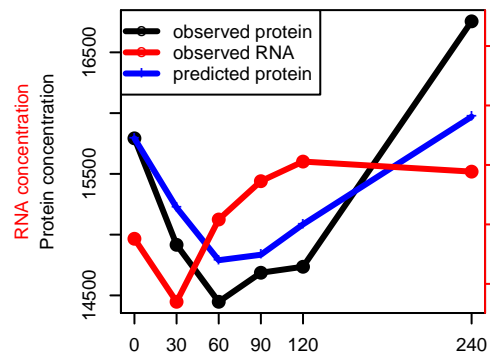

Time (min)  
ks = 0.0760745775982141 kd = 0.00339644835633058

BUG1

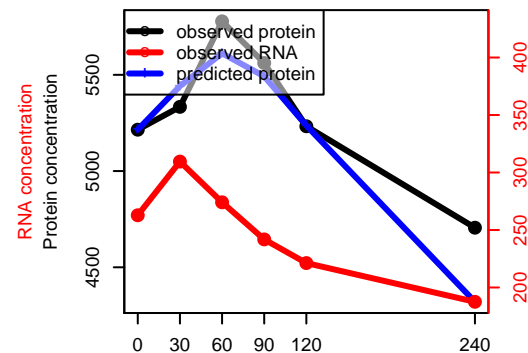

Time (min)  
ks = 0.281097220364348 kd = 0.0137370029680538

NOP6

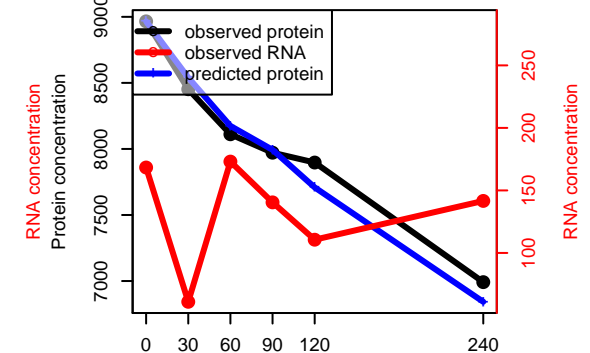

Time (min)  
ks = 0.136746798698494 kd = 0.00339644835633058

TRM1

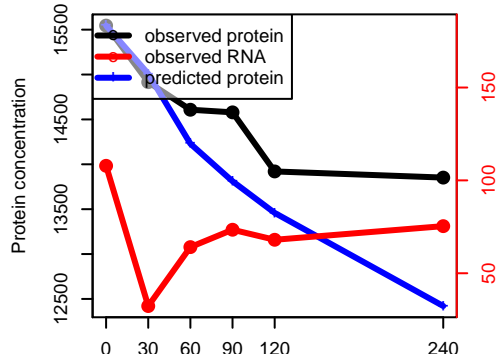

Time (min)  
ks = 0.487104701101467 kd = 0.00339644835633058

GCD6

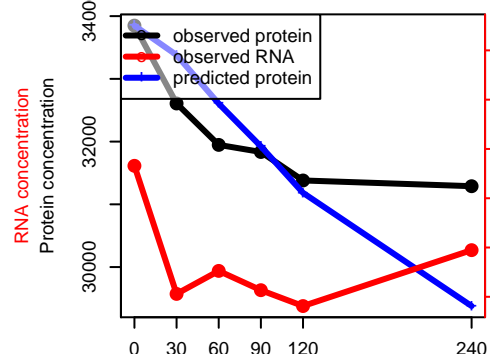

Time (min)  
ks = 1.18149961242977 kd = 0.00339644835633058

PRO1

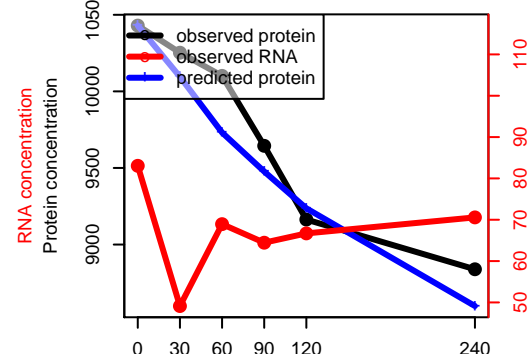

Time (min)  
ks = 0.361897534871035 kd = 0.00339644835633058

SVF1

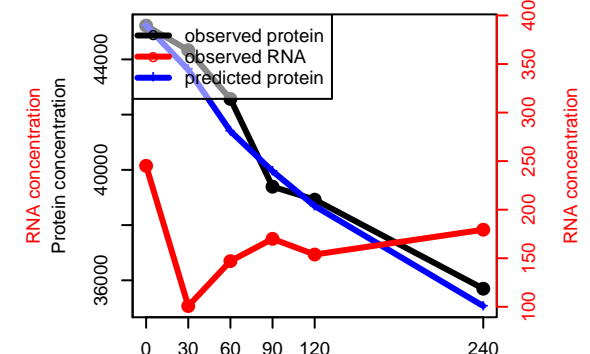

Time (min)  
ks = 0.564881419875866 kd = 0.00339644835633058

IRC22

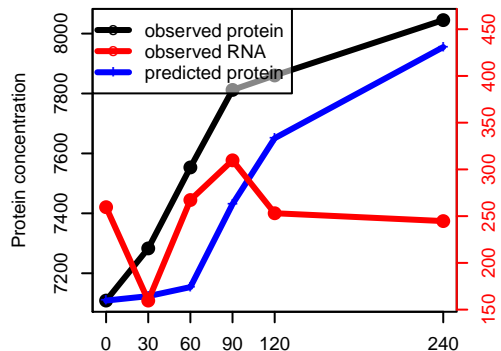

Time (min)  
ks = 0.117748876067574 kd = 0.00339644835633058

NUG1

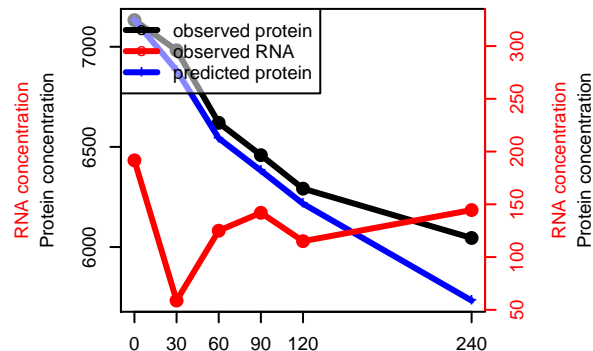

Time (min)  
ks = 0.123844212987841 kd = 0.00339644835633058

MXR1

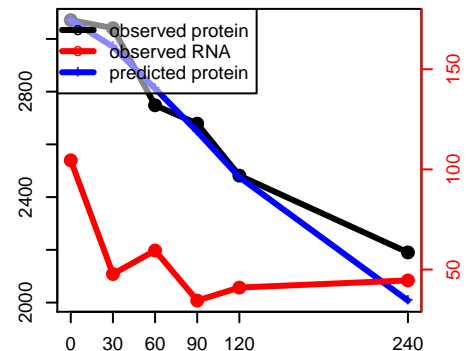

Time (min)  
ks = 0.110090527673411 kd = 0.00387886123331776

RPS26B

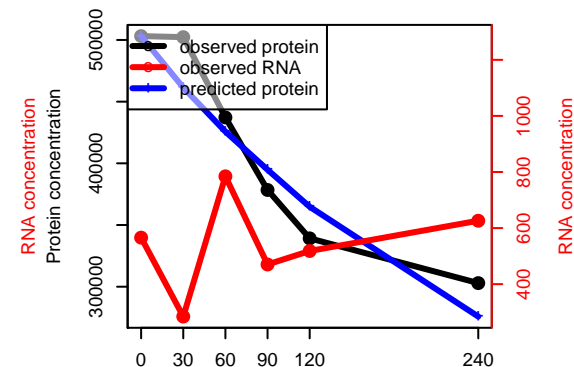

Time (min)  
ks = 0.582373113184994 kd = 0.00339644835633058

PMA1

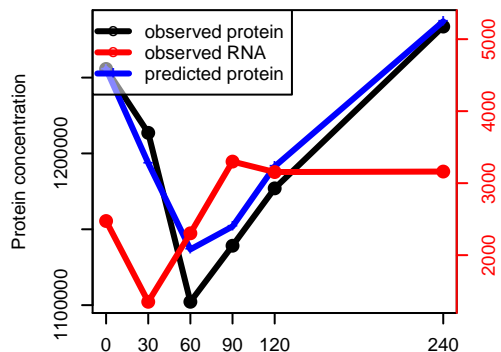

Time (min)  
ks = 2.35779882755654 kd = 0.0053586745228927

GET1

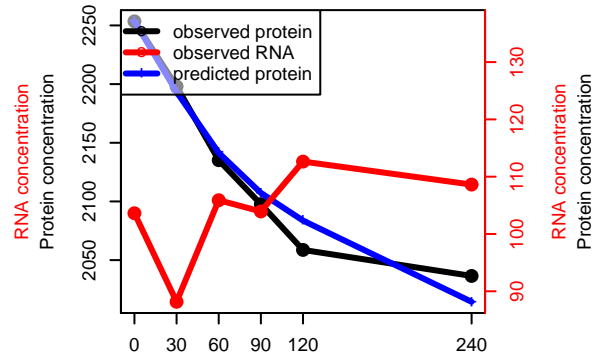

Time (min)  
ks = 0.0579349263038106 kd = 0.00339644835633058

YGL039W

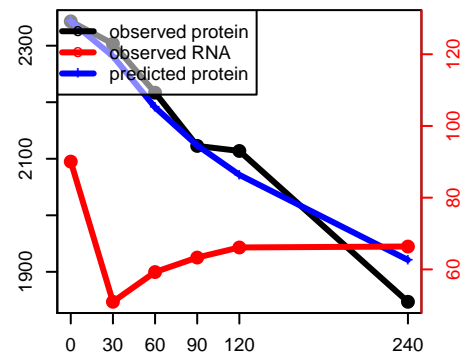

Time (min)  
ks = 0.08295346538171 kd = 0.00339644835633058

TIF4632

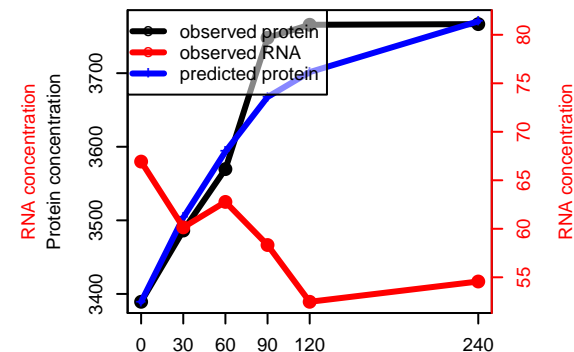

Time (min)  
ks = 0.244538707237875 kd = 0.00339644835633058

NSR1

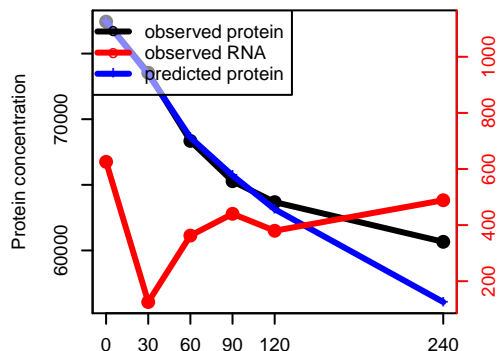

Time (min)  
ks = 0.327033773691847 kd = 0.00339644835633058

ERG1

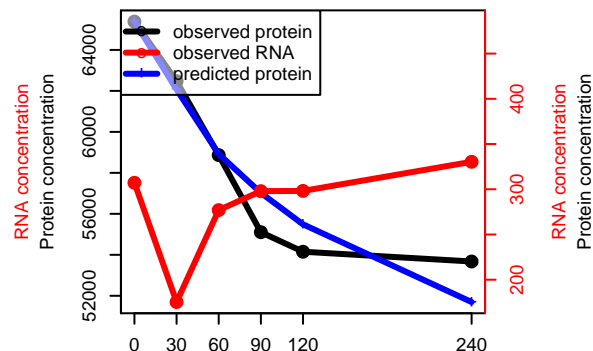

Time (min)  
ks = 0.532119318997212 kd = 0.00373159384056435

YHB1

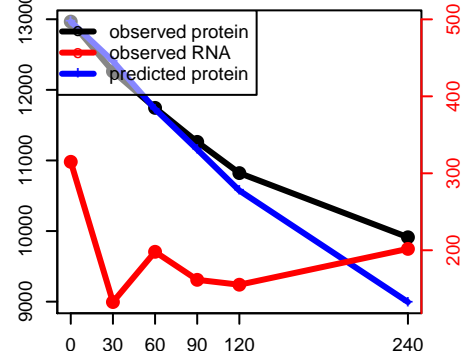

Time (min)  
ks = 0.110372366242465 kd = 0.00339644835633058

EFG1

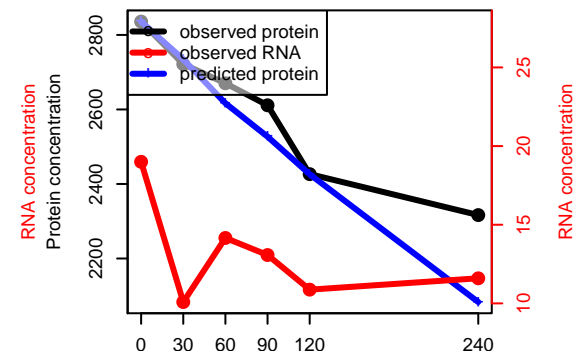

Time (min)  
ks = 0.422405243704294 kd = 0.00339644835633058

ZUO1

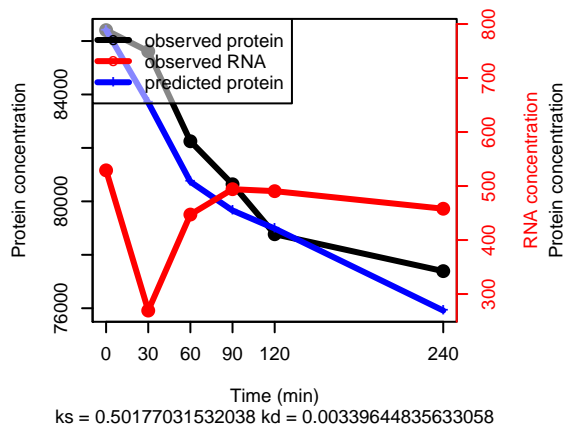

NCP1

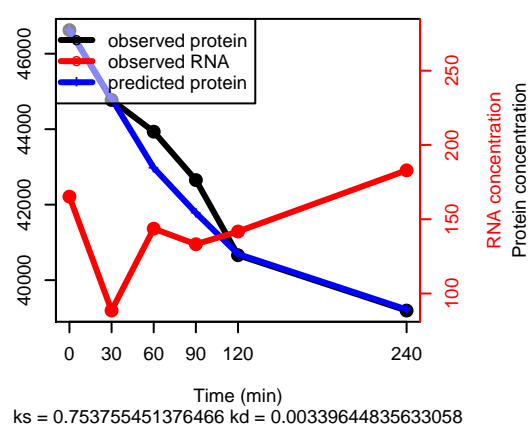

RPF1

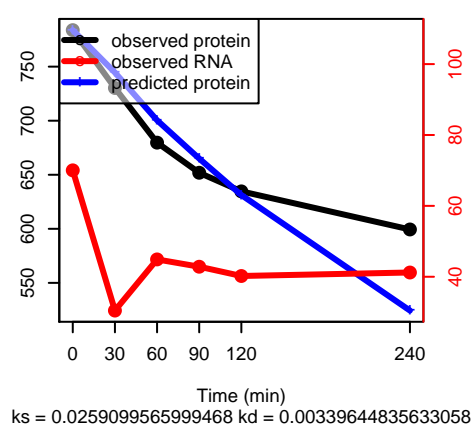

LSM12

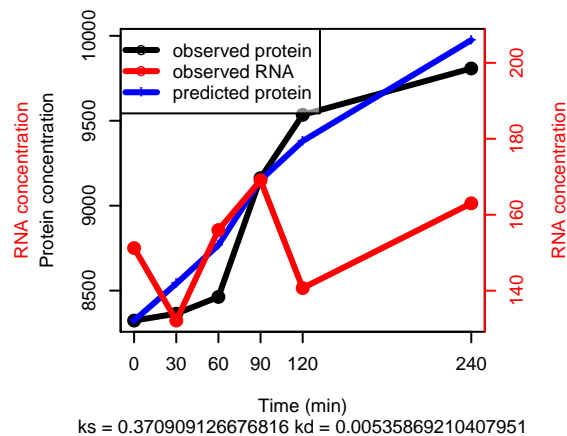

MMF1

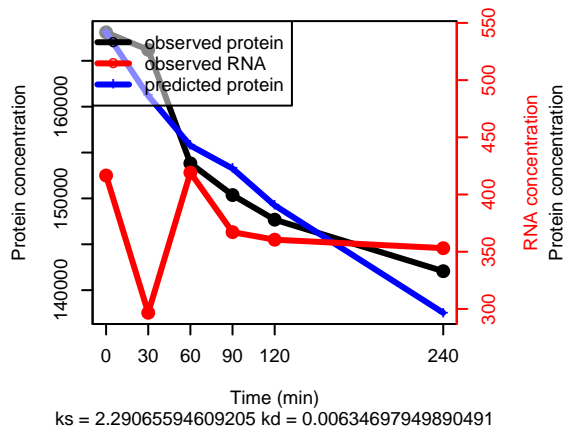

KAR2

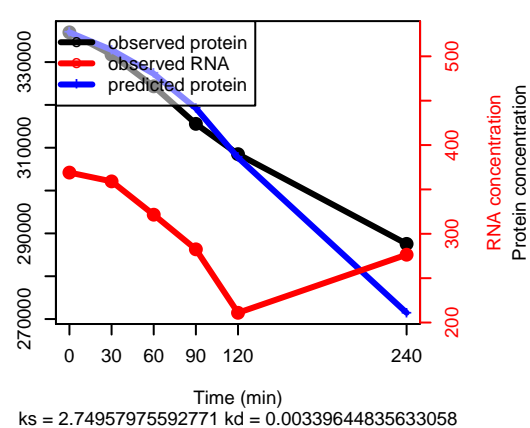

MTR4

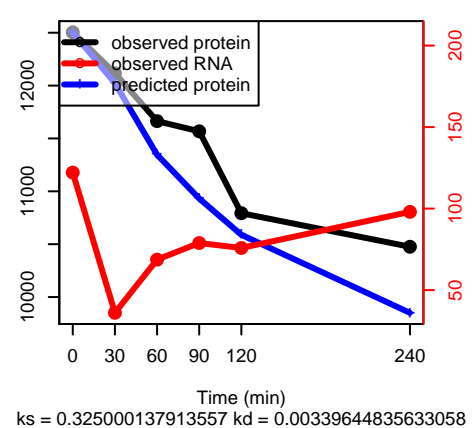

RPL17B

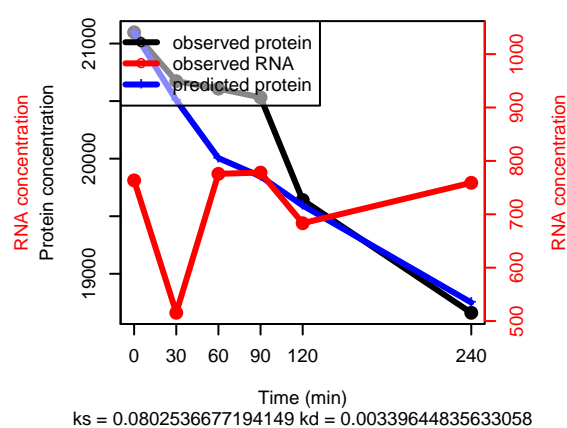

HAM1

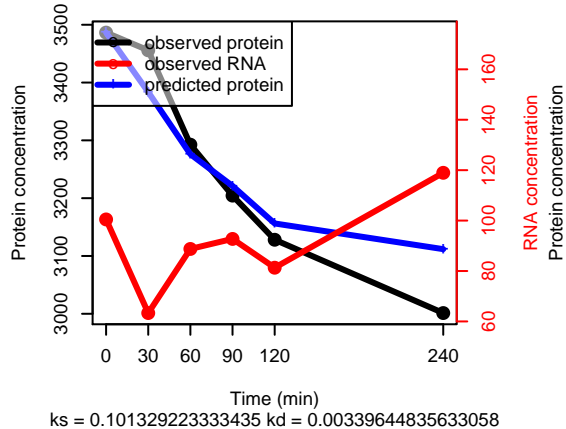

PRS1

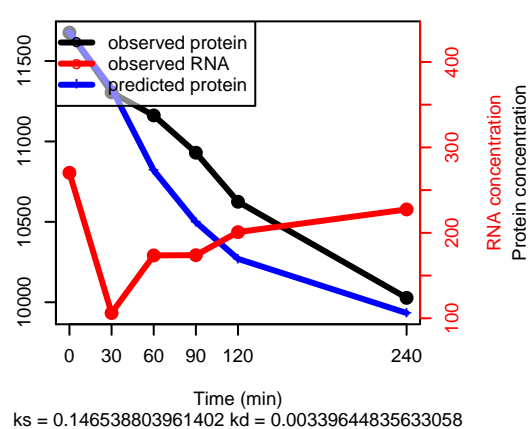

ERG3

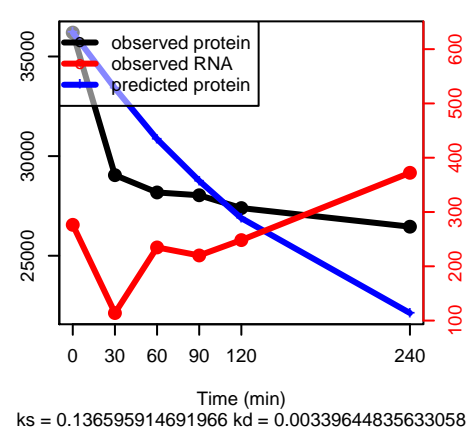

DPH6

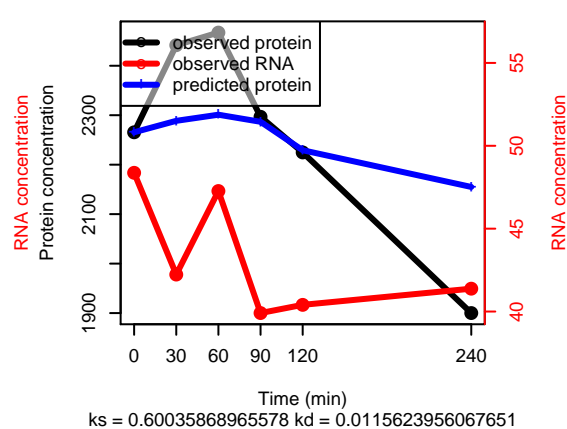

YLR179C

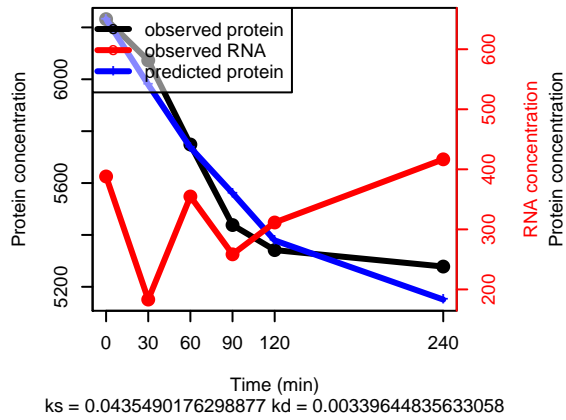

FRE1

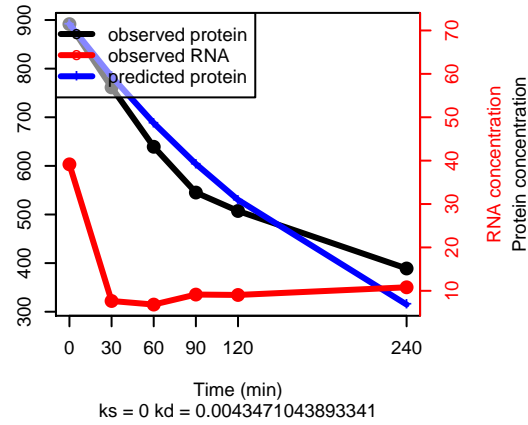

IMD4

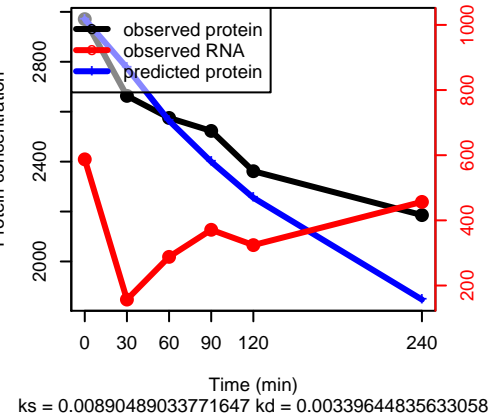

PGA3

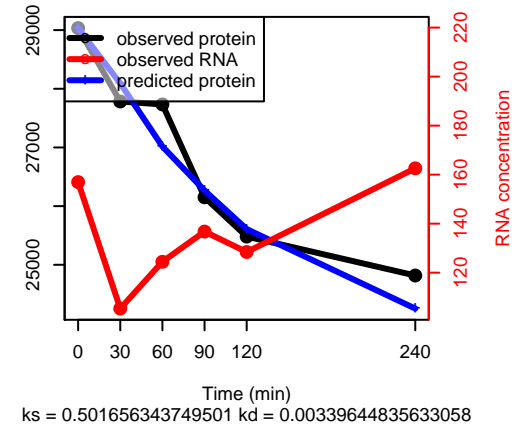

RRP5

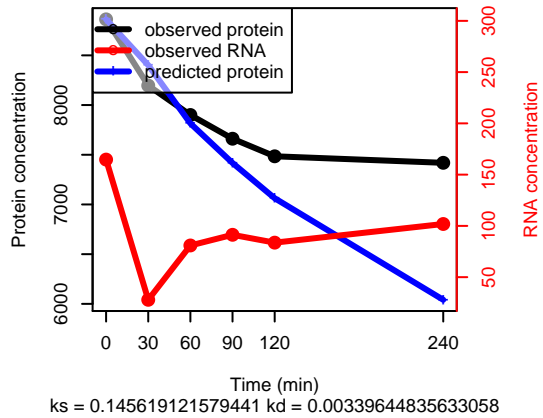

RLP7

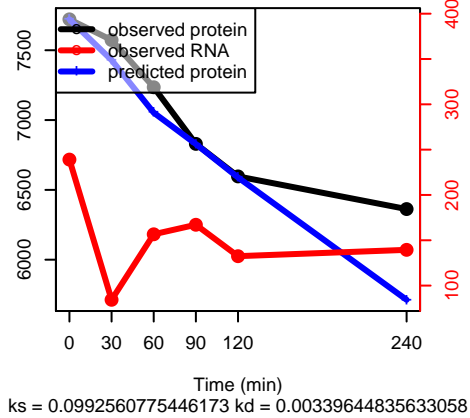

GCD10

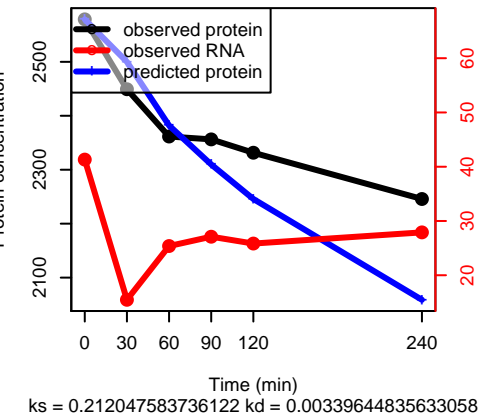

TOM70

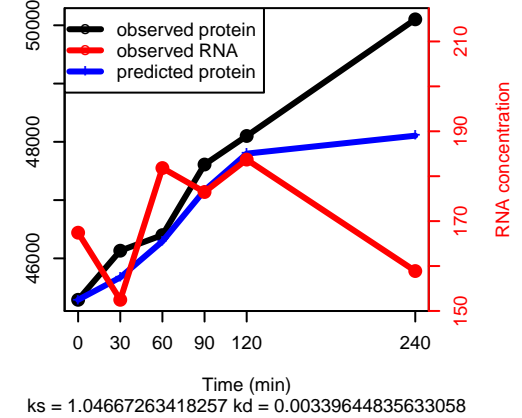

KRI1

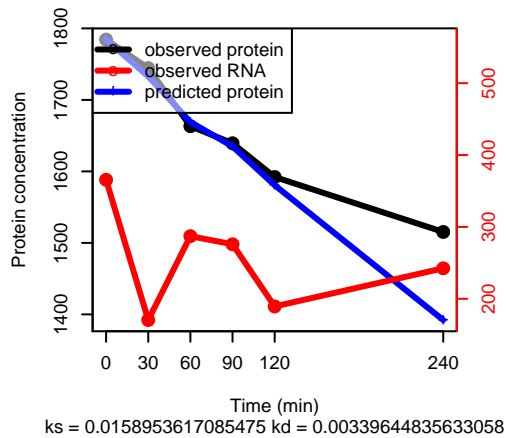

ACC1

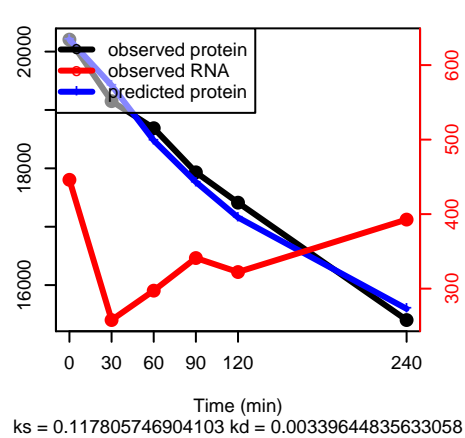

MET22

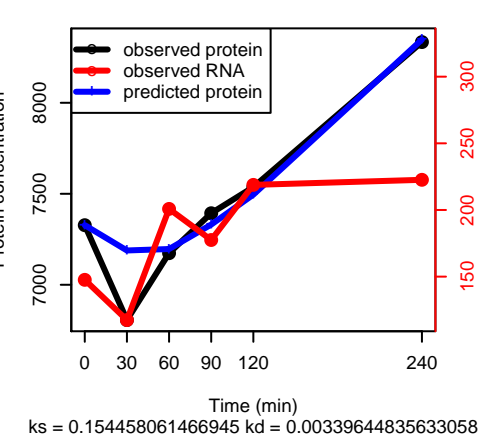

STI1

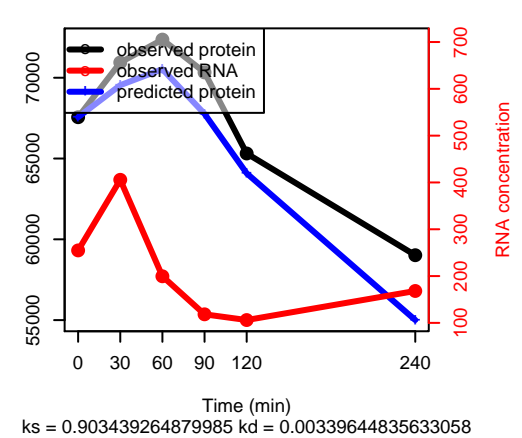

RKI1

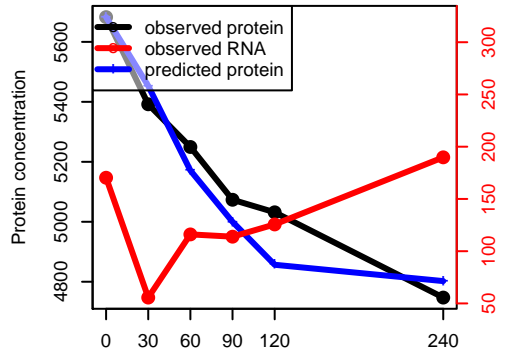

VTC3

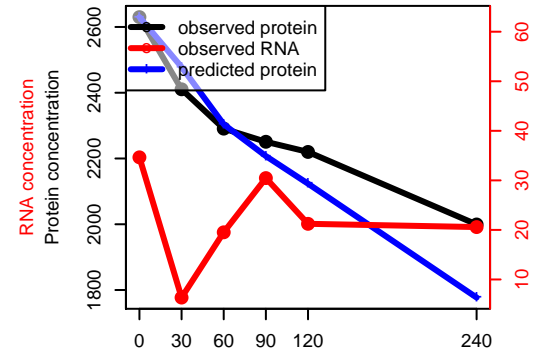

PDR12

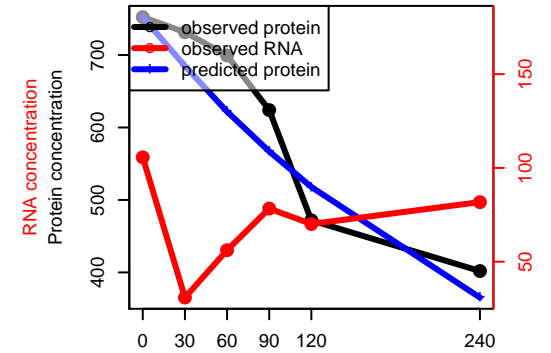

MOT1

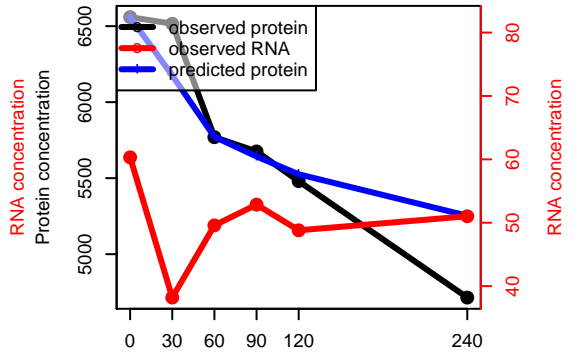

SSE1

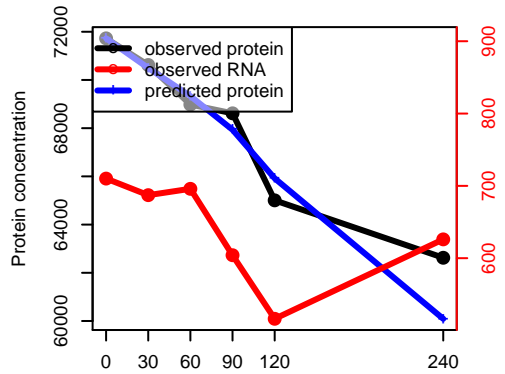

FAS2

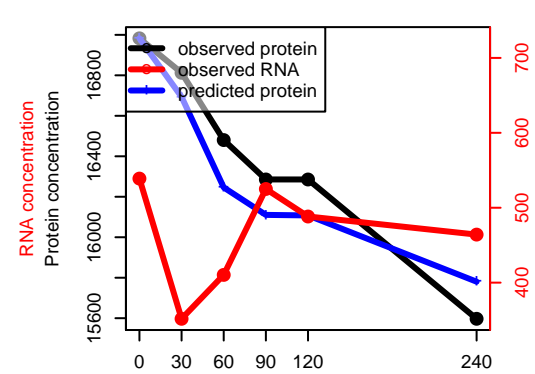

HTS1

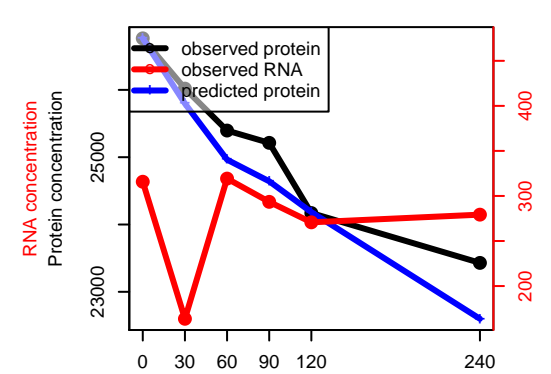

RBG1

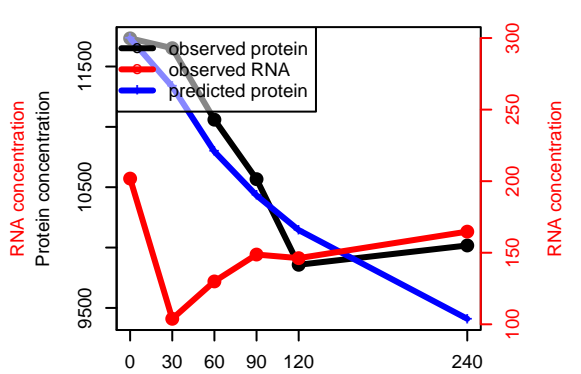

PRS4

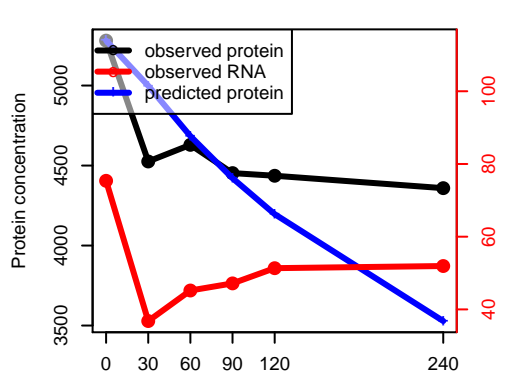

HMT1

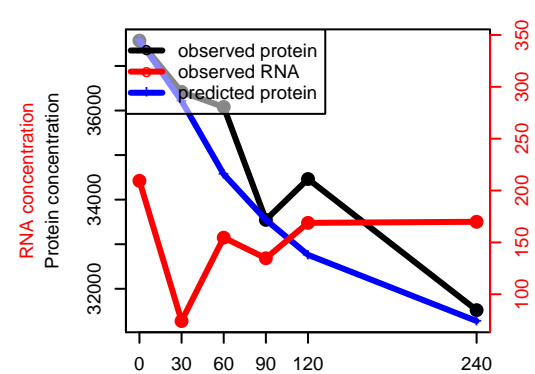

PHO5

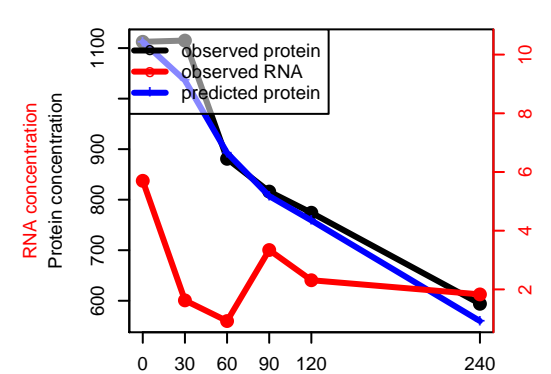

SUP45

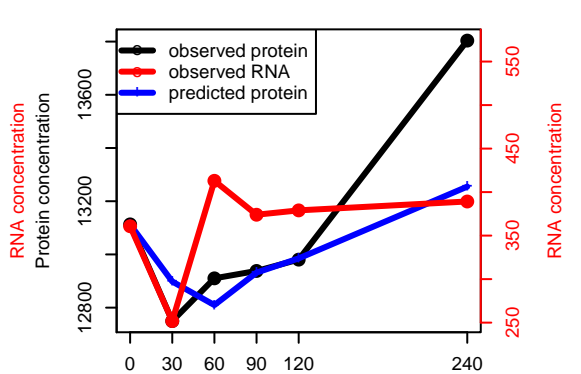

SEC66

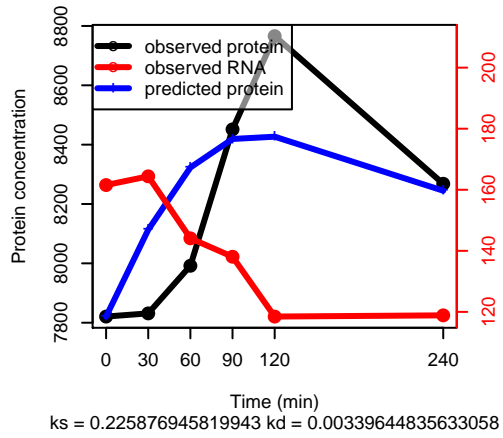

SMY2

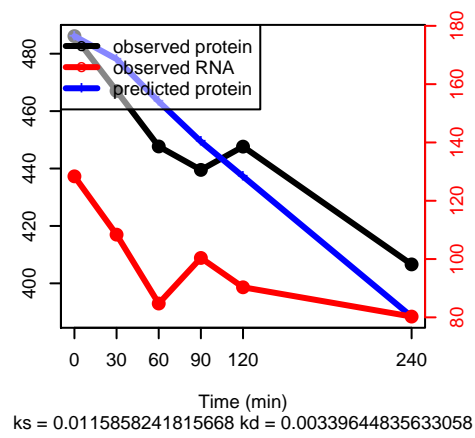

DUR1-2

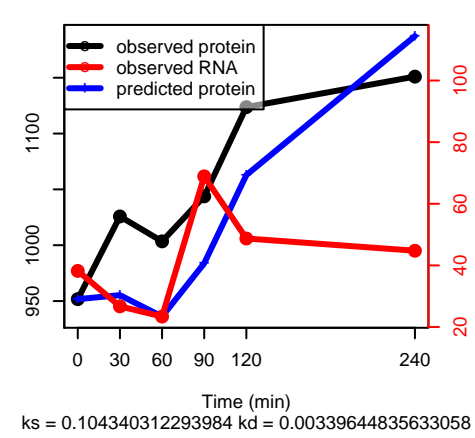

HIS7

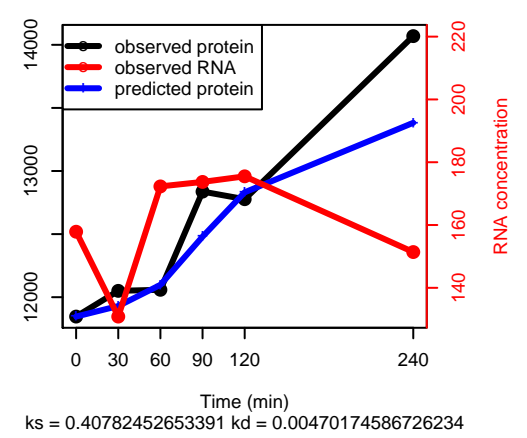

RRP7

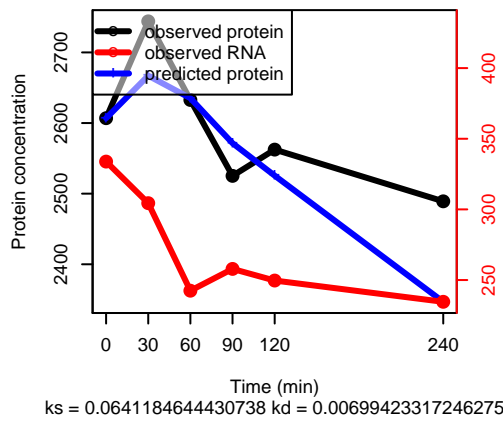

CHA1

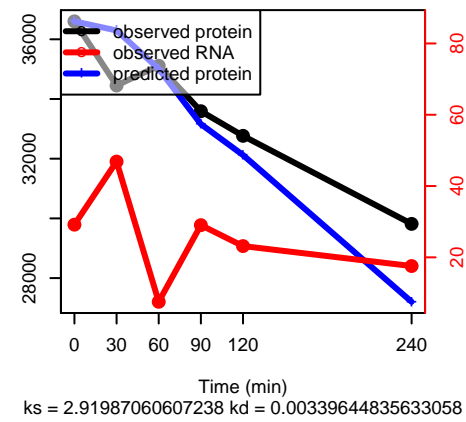

TAH1

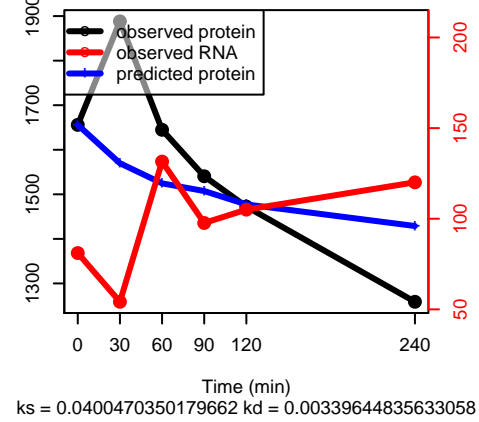

SRP14

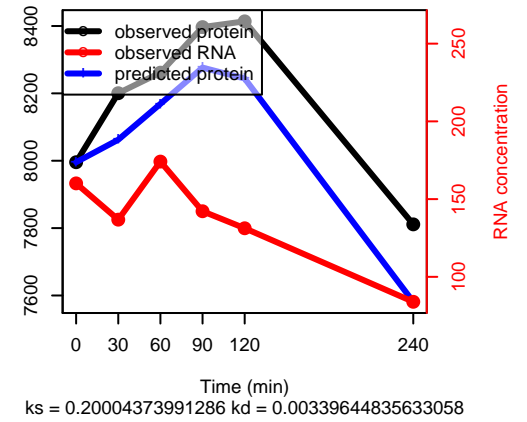

YDL121C

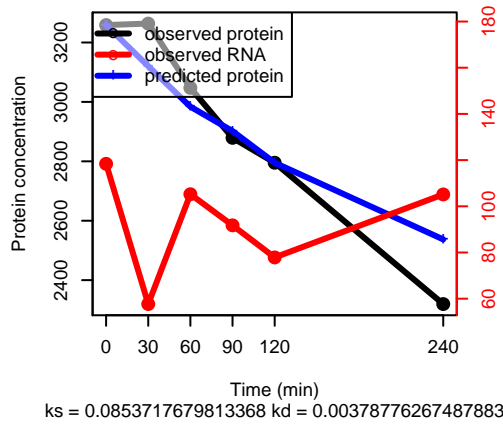

GLT1

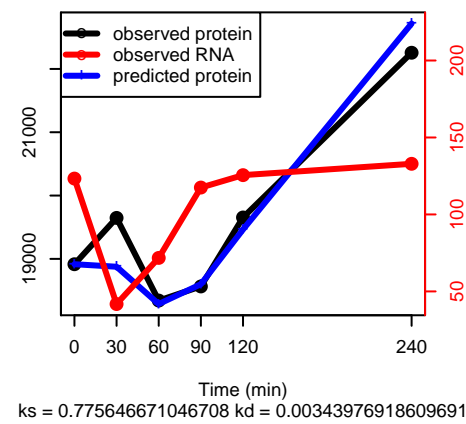

MRH1

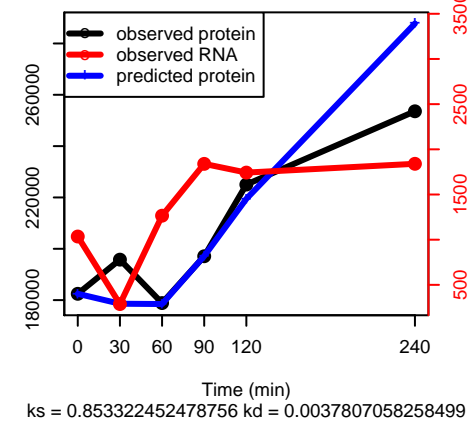

ARX1

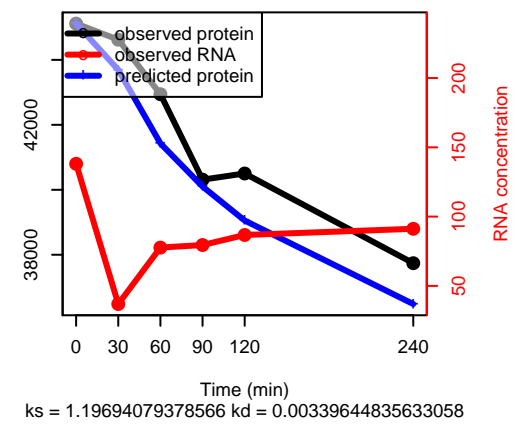

TRM82

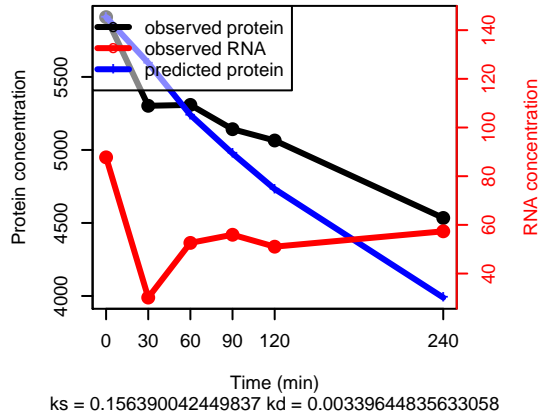

BFR2

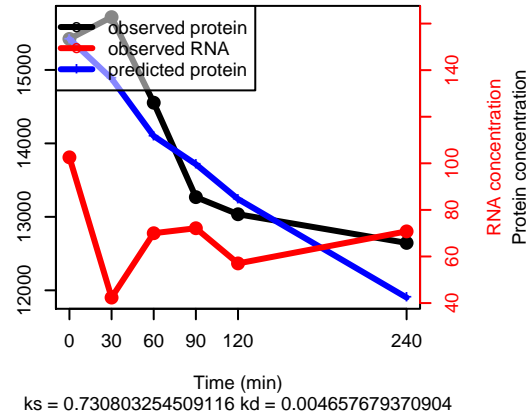

RMT2

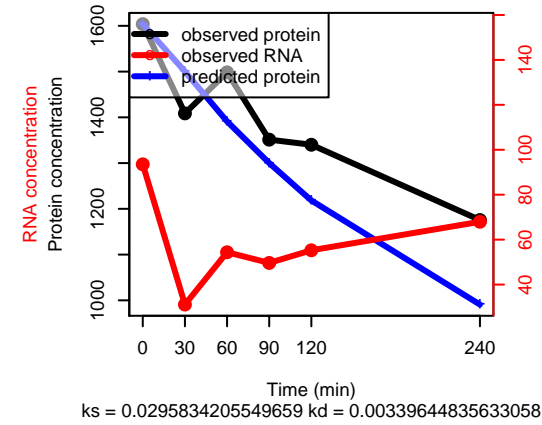

KRE2

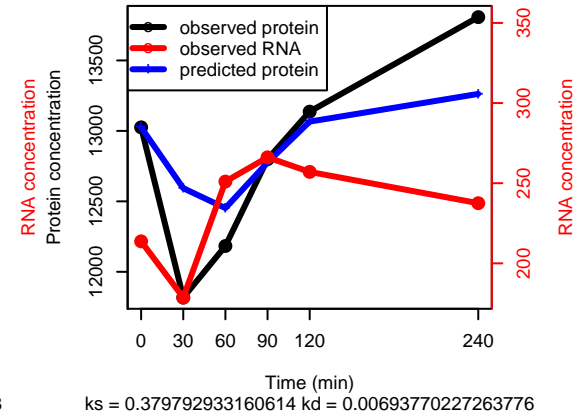

NOP16

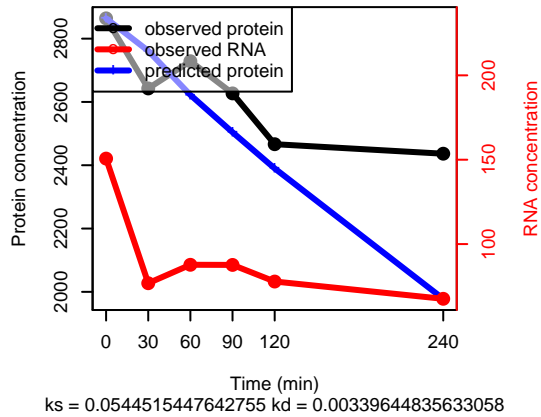

TPA1

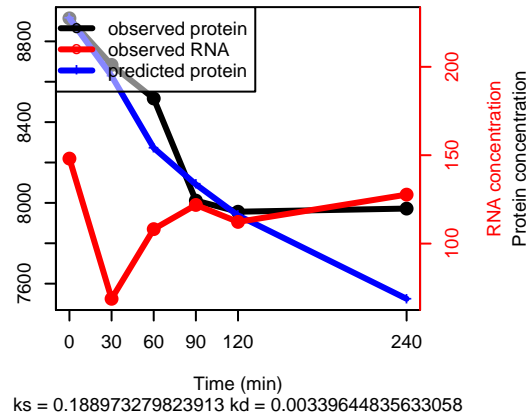

MET6

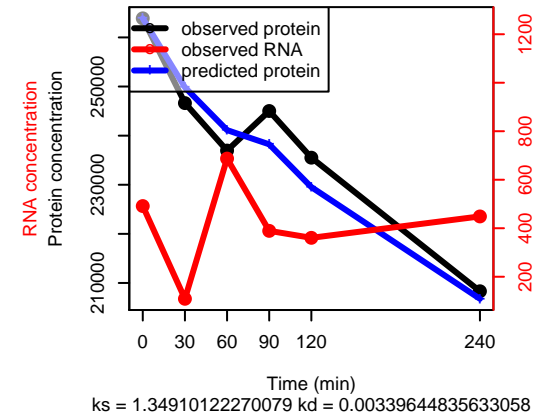

VTC2

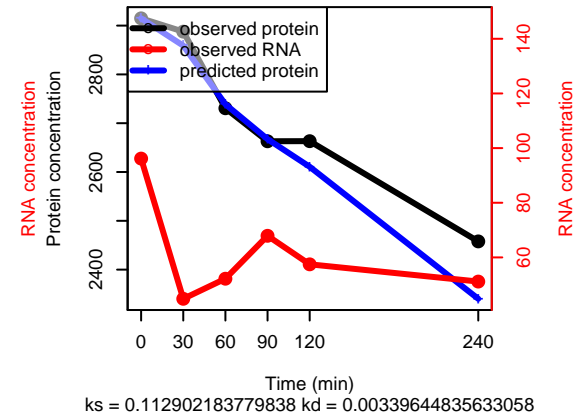

NIC96

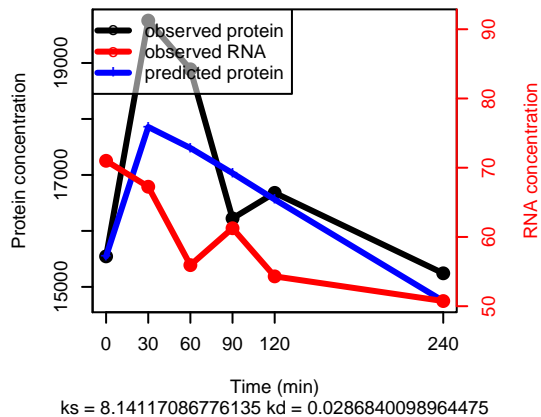

SCL1

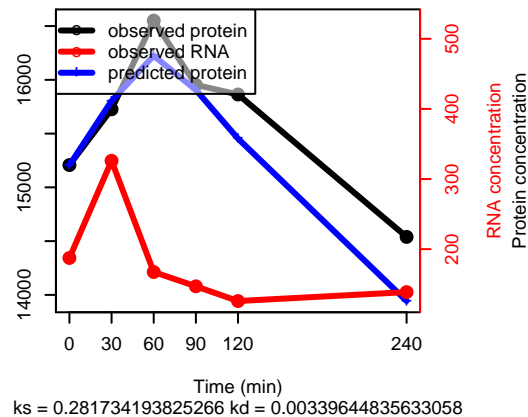

NAB2

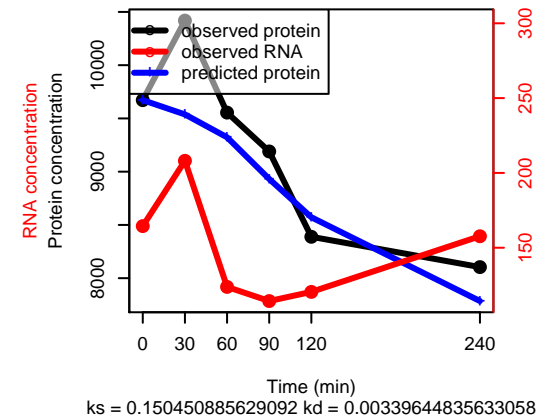

ARO2

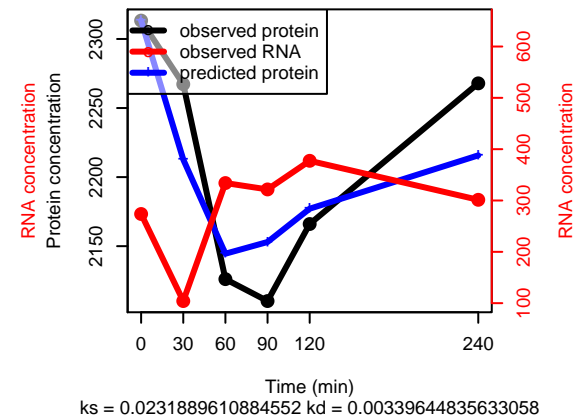



SUA5

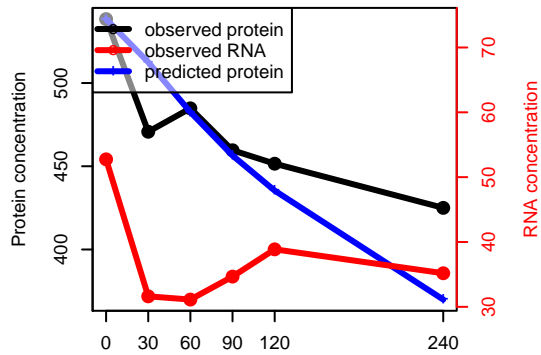

Time (min)  
ks = 0.0219418626045198 kd = 0.00339644835633058

ADE6

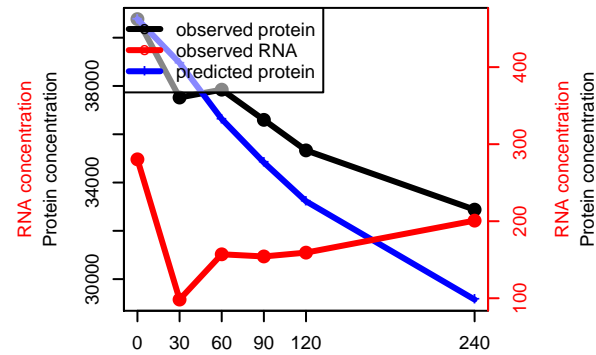

Time (min)  
ks = 0.396302836318099 kd = 0.00339644835633058

TIF4631

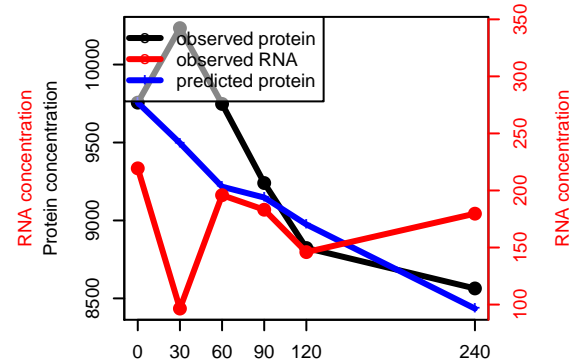

Time (min)  
ks = 0.15256592978572 kd = 0.00339644835633058

HGH1

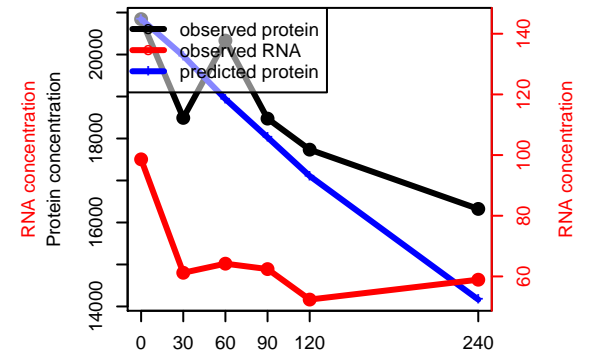

Time (min)  
ks = 0.504498774732251 kd = 0.00339644835633058

ADE3

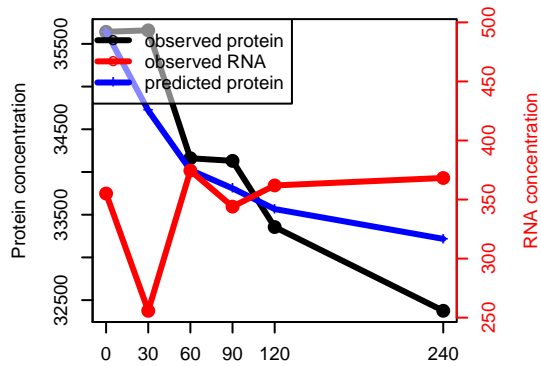

Time (min)  
ks = 0.339365665942874 kd = 0.00380259887684248

MES1

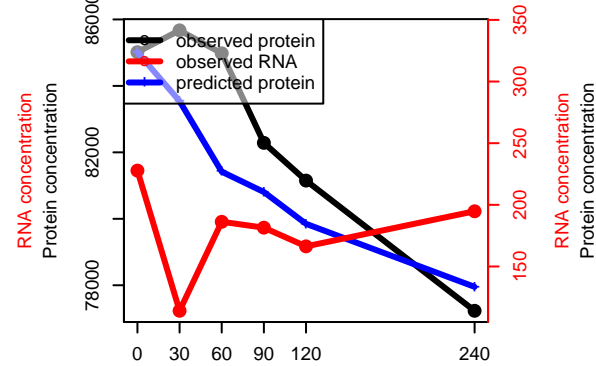

Time (min)  
ks = 1.38955367249557 kd = 0.00339644835633058

PXR1

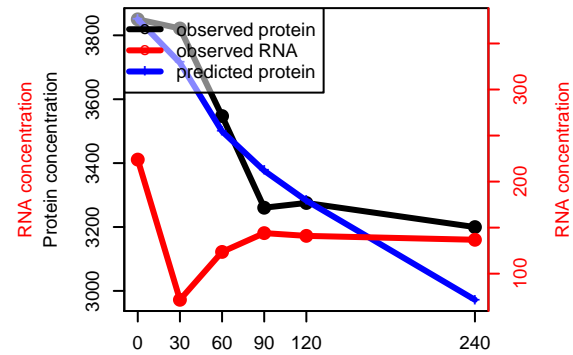

Time (min)  
ks = 0.0676169757082492 kd = 0.0038257577590285

STE20

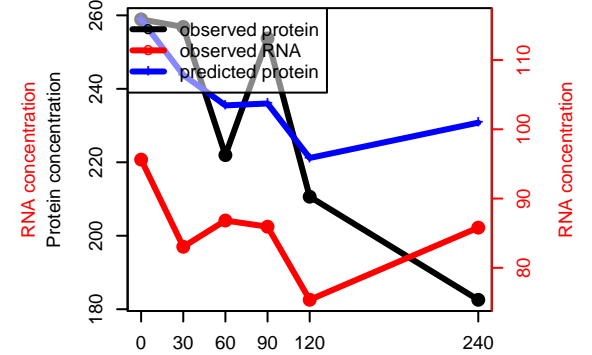

Time (min)  
ks = 0.142500857512415 kd = 0.052159648869365

RPL27A

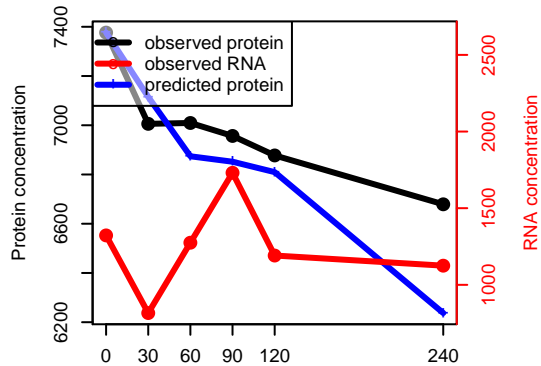

Time (min)  
ks = 0.014973570560551 kd = 0.00339644835633058

KEL1

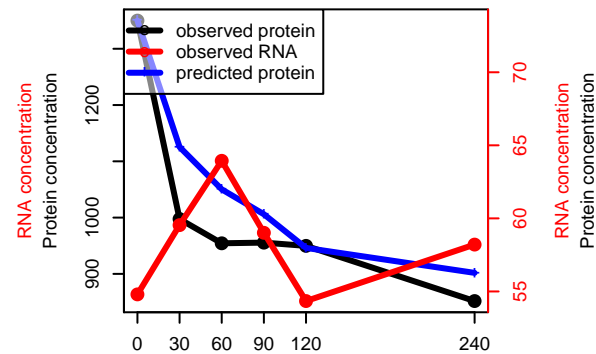

Time (min)  
ks = 0.366382417282247 kd = 0.0232733004112113

OYE2

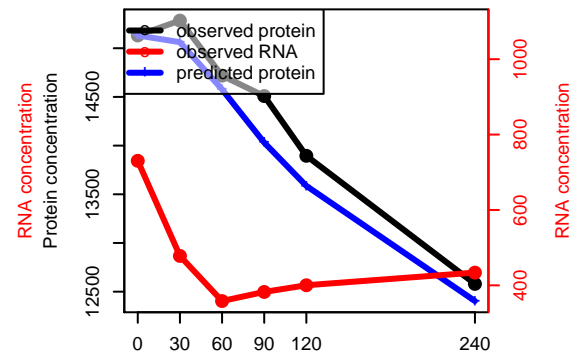

Time (min)  
ks = 0.0818731637668655 kd = 0.00339644835633058

URA2

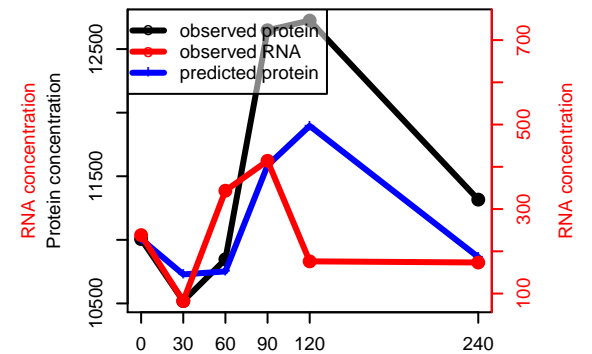

Time (min)  
ks = 0.173192872706764 kd = 0.00339644835633058



REE1

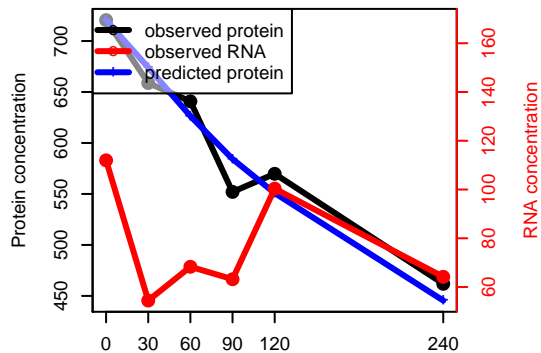

Time (min)  
ks = 0.00991030110257617 kd = 0.00339644835633058

MRT4

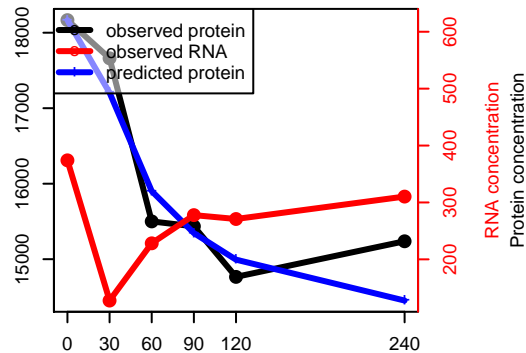

Time (min)  
ks = 0.25468048977858 kd = 0.00538979868546709

URB1

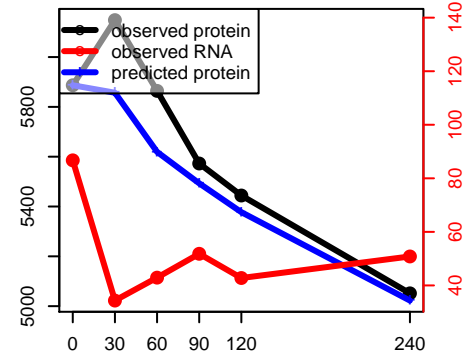

Time (min)  
ks = 0.345979841875736 kd = 0.00371754152815627

OAC1

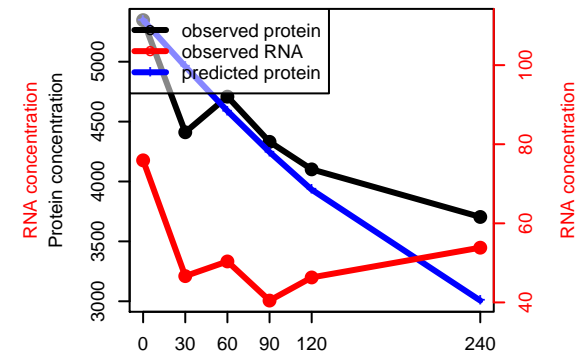

Time (min)  
ks = 0.0785363271408934 kd = 0.00339644835633058

RPL40B

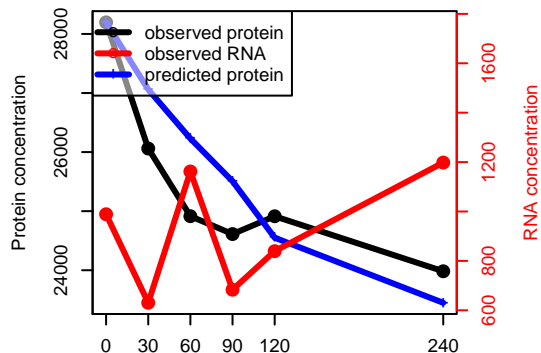

Time (min)  
ks = 0.0695697507491012 kd = 0.00339644835633058

RPL8B

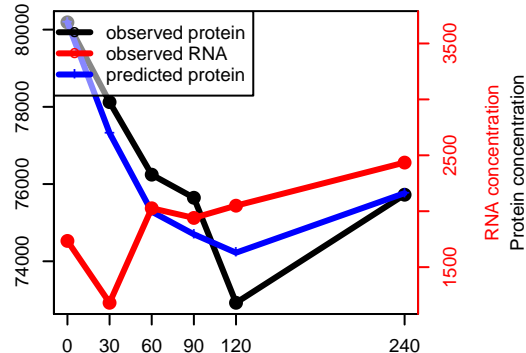

Time (min)  
ks = 0.118642803878015 kd = 0.00339644835633058

CBF5

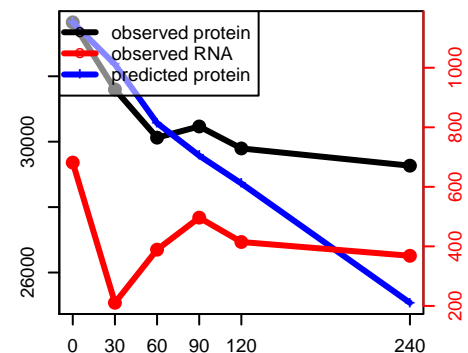

Time (min)  
ks = 0.15593412586272 kd = 0.00339644835633058

CDC123

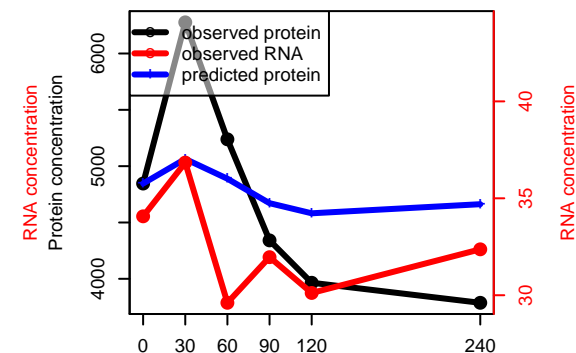

Time (min)  
ks = 4.48145325308152 kd = 0.0306793410589456

CPR6

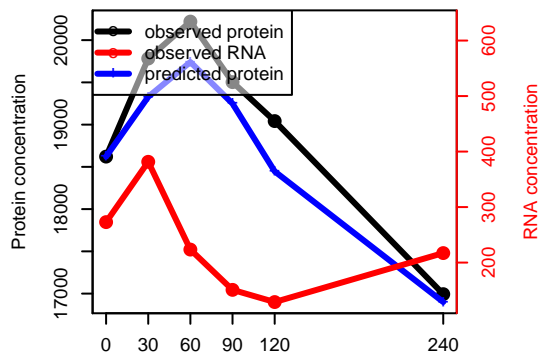

Time (min)  
ks = 0.267788779271026 kd = 0.00339644835633058

UTP13

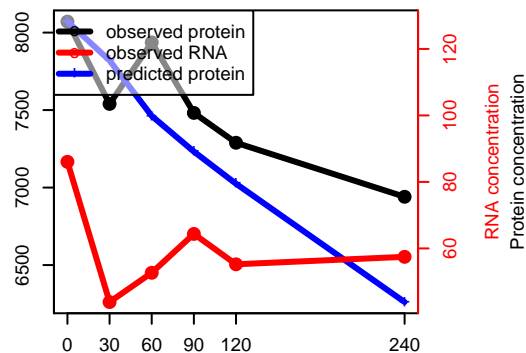

Time (min)  
ks = 0.289666755096918 kd = 0.00339644835633058

NUP2

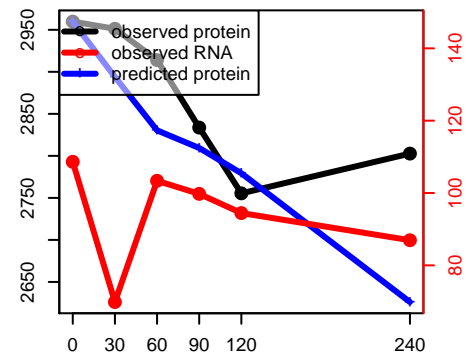

Time (min)  
ks = 0.087407933077206 kd = 0.00339644835633058

RPL6B

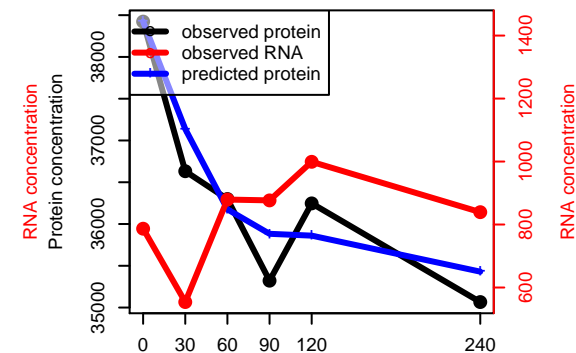

Time (min)  
ks = 0.12799381426359 kd = 0.00339644835633058

FPR4

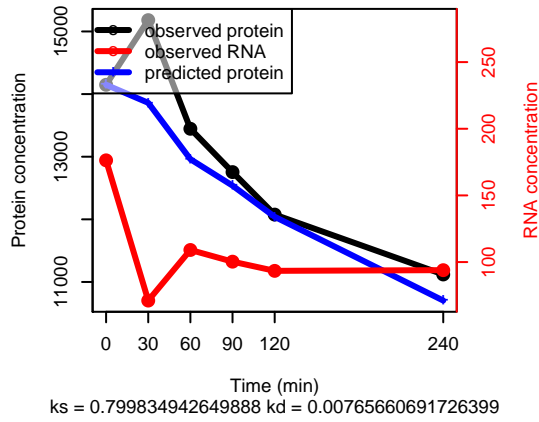

ERG6

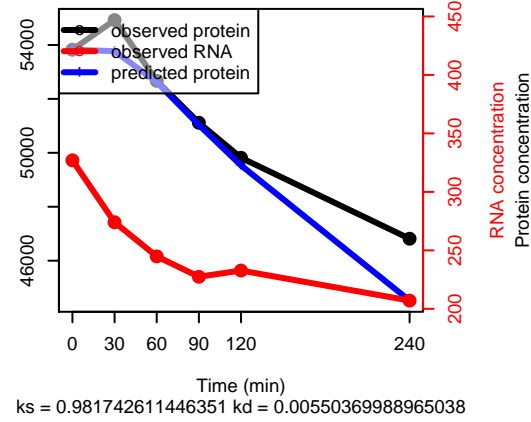

UTP14

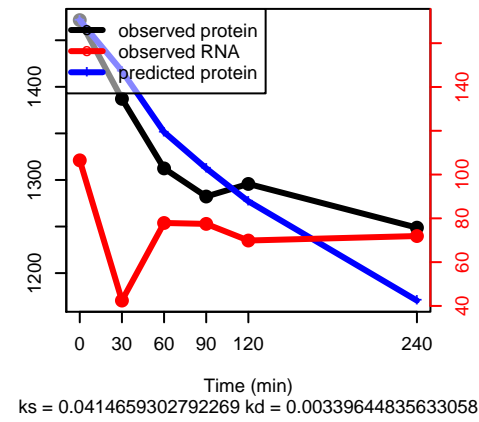

GIM5

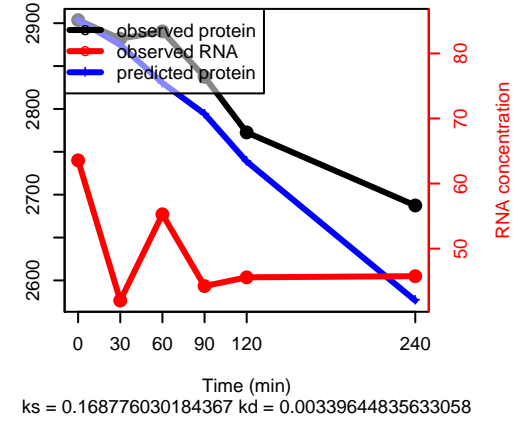

NUP188

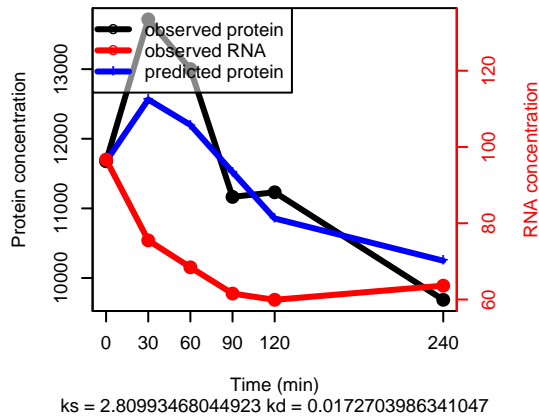

PDS5

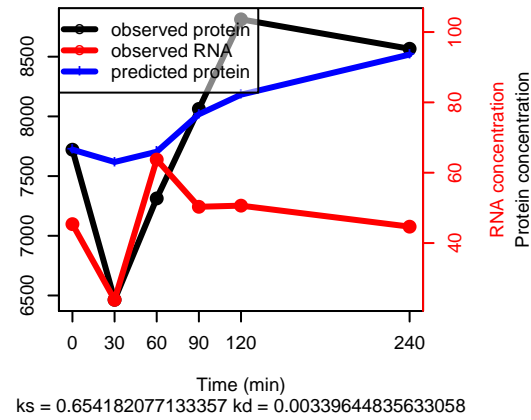

ILV2

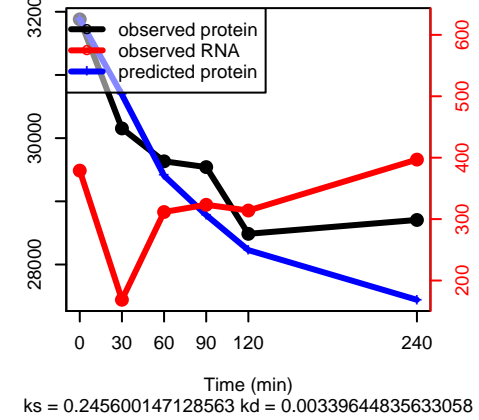

ASC1

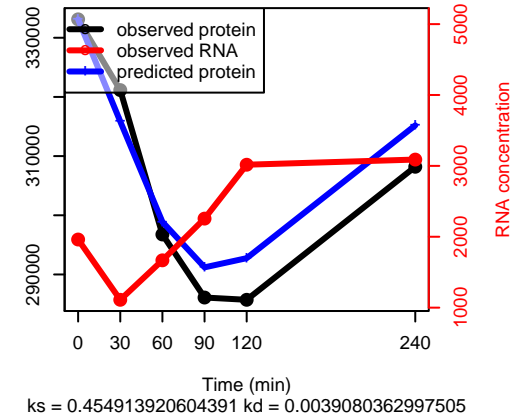

RPL13B

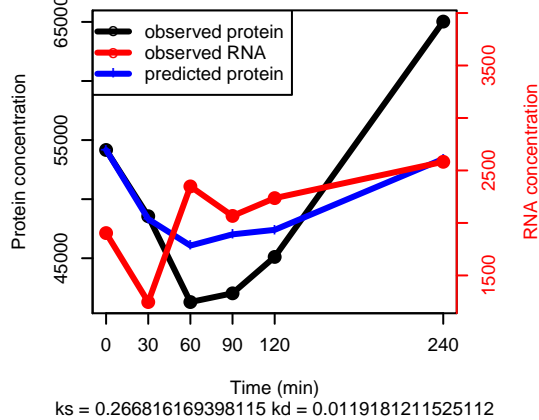

TIF34

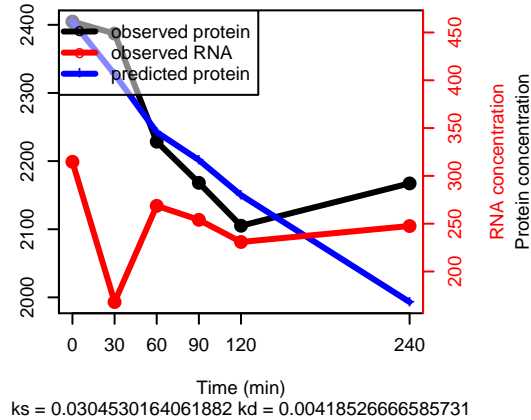

NGL2

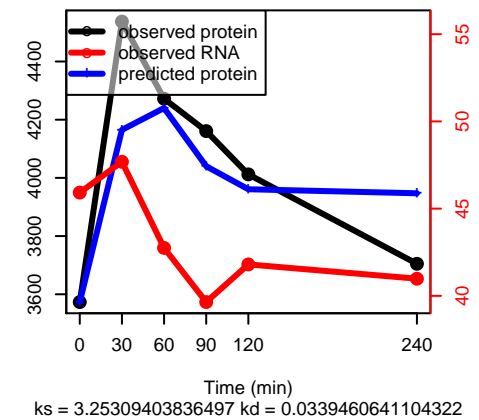

PSE1

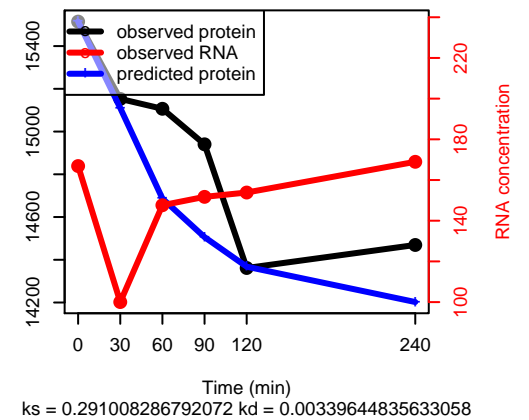

ADH6

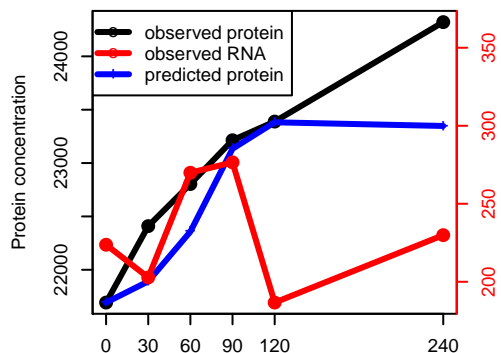

Time (min)  
ks = 0.378489477155977 kd = 0.00339644835633058

NOP2

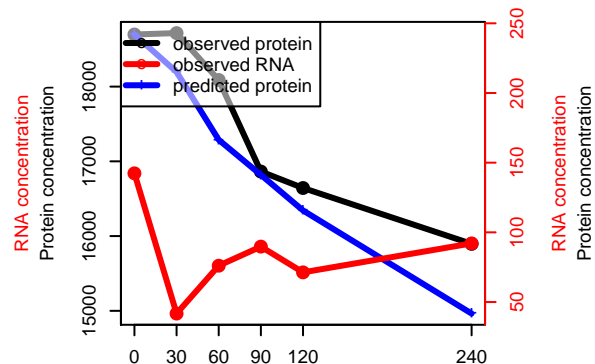

Time (min)  
ks = 0.501888600216802 kd = 0.00339644835633058

YDJ1

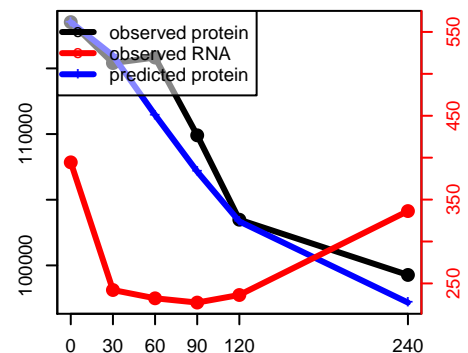

Time (min)  
ks = 0.991901227491225 kd = 0.00339644835633058

AAH1

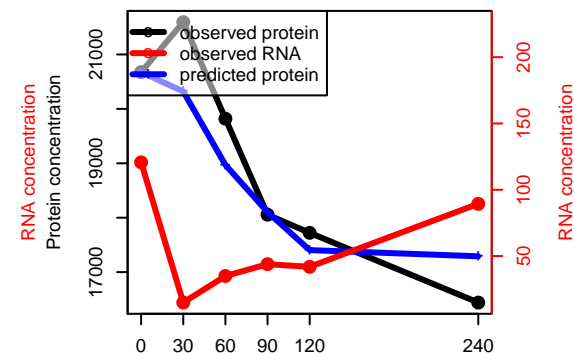

Time (min)  
ks = 0.861478098100134 kd = 0.00339734062202401

FMP41

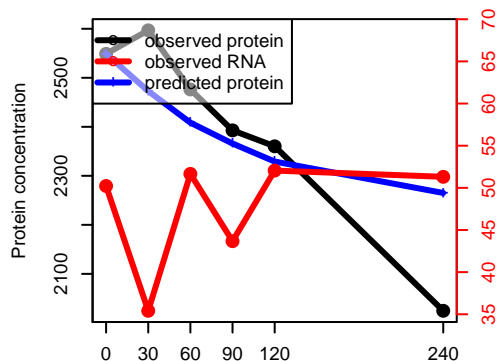

Time (min)  
ks = 0.140590031260632 kd = 0.00339644835633058

NOP13

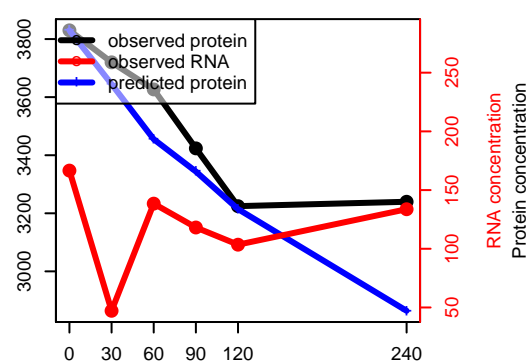

Time (min)  
ks = 0.0610914774528069 kd = 0.00339644835633058

ADE12

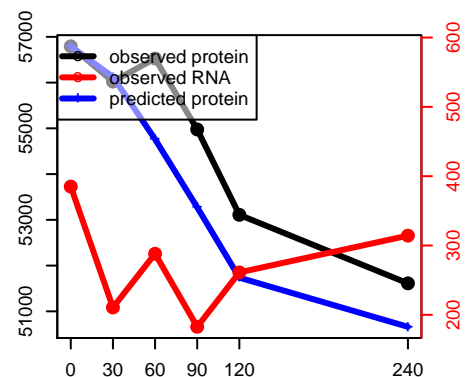

Time (min)  
ks = 0.570039549178333 kd = 0.00339644835633058

TRM112

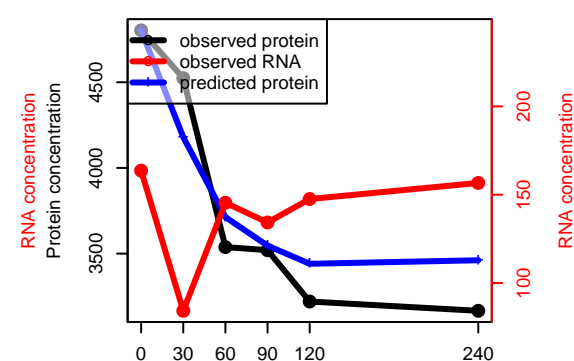

Time (min)  
ks = 0.275710557647402 kd = 0.0121444173711196

BRE5

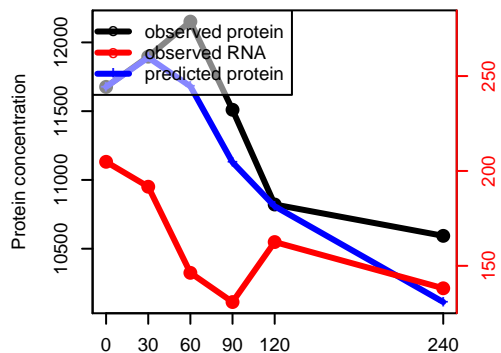

Time (min)  
ks = 0.478625311322322 kd = 0.00741849674302014

NOG2

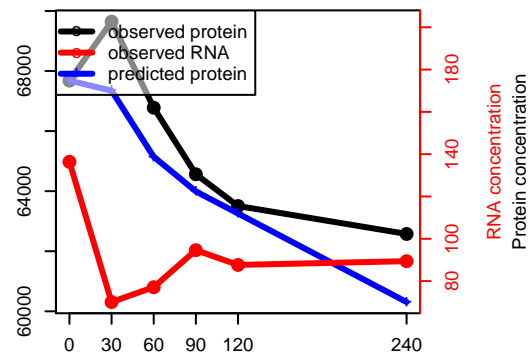

Time (min)  
ks = 2.31598937716361 kd = 0.00369244150768857

TSR4

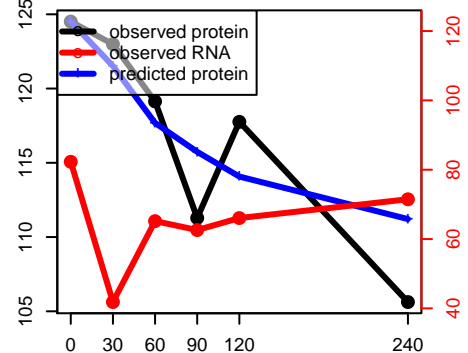

Time (min)  
ks = 0.00517605282648196 kd = 0.00339644835633058

PRE6

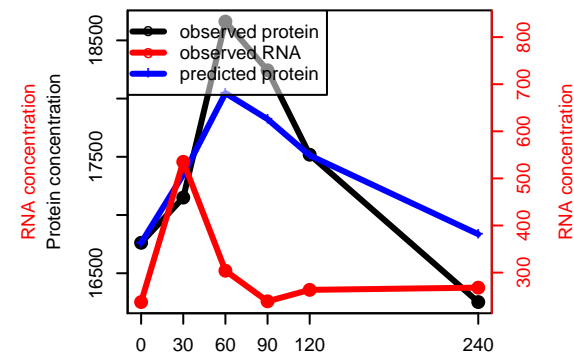

Time (min)  
ks = 0.205359547535937 kd = 0.00352889295668053

GPD2

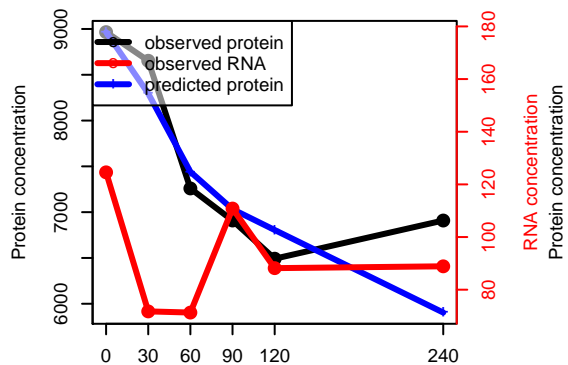

Time (min)  
ks = 0.484909452812689 kd = 0.00804642837884884

BRX1

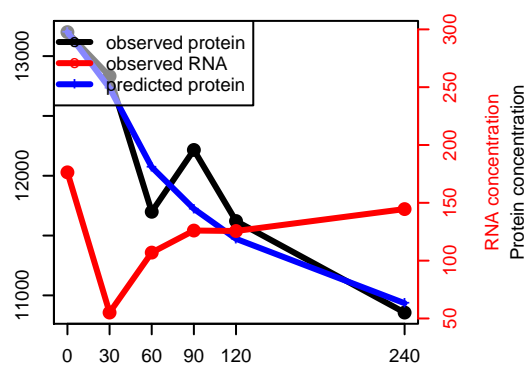

Time (min)  
ks = 0.246543581529038 kd = 0.00339644835633058

TRM10

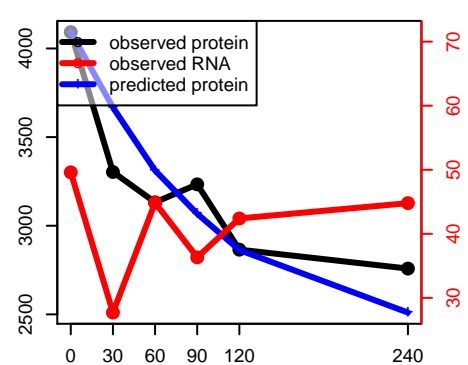

Time (min)  
ks = 0.391051718883713 kd = 0.00751253375201866

CTR9

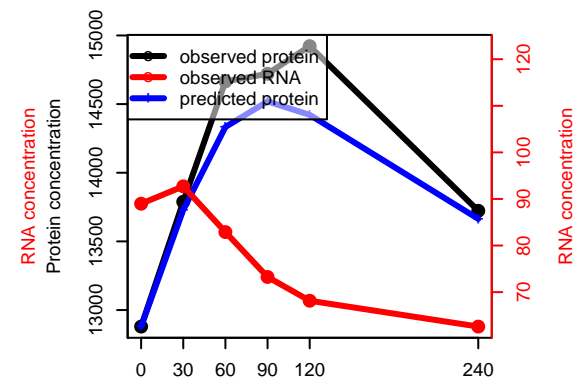

Time (min)  
ks = 1.18757223289433 kd = 0.00597862919275946

DBP5

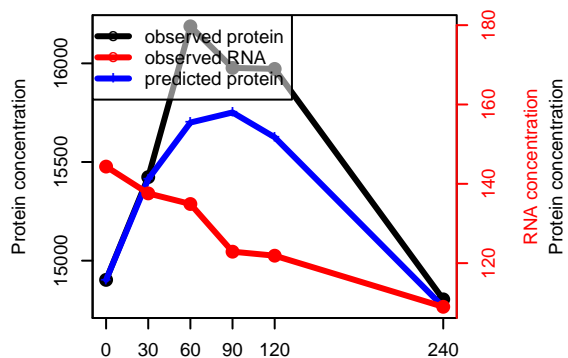

Time (min)  
ks = 0.929515371739952 kd = 0.00751124018223585

BFR1

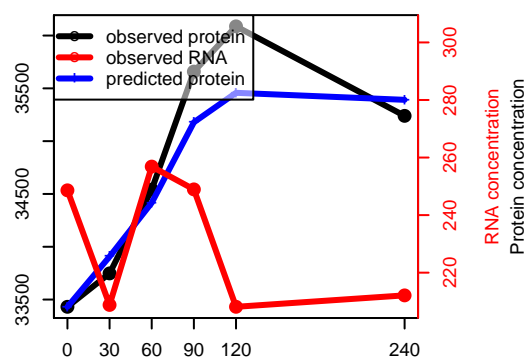

Time (min)  
ks = 0.570174549273193 kd = 0.00339644835633058

RPS10A

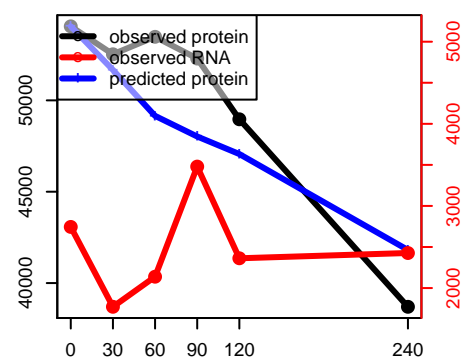

Time (min)  
ks = 0.0444376845238067 kd = 0.00339644835633058

NOP58

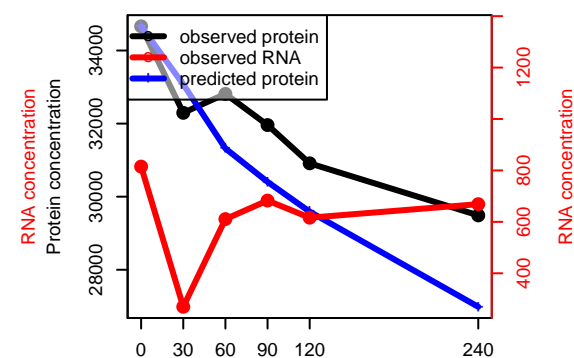

Time (min)  
ks = 0.114643384162502 kd = 0.00339644835633058

ALA1

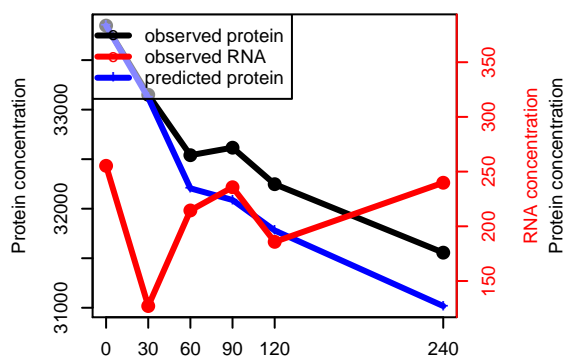

Time (min)  
ks = 0.468559555037163 kd = 0.00339644835633058

RPA190

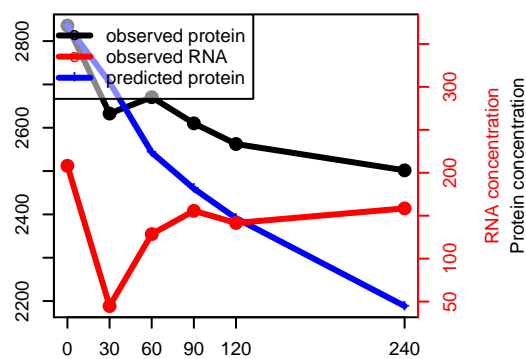

Time (min)  
ks = 0.0400818339138961 kd = 0.00339644835633058

NAN1

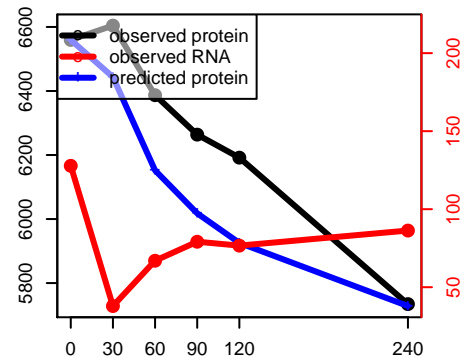

Time (min)  
ks = 0.221119783278953 kd = 0.00339644835633058

NOP53

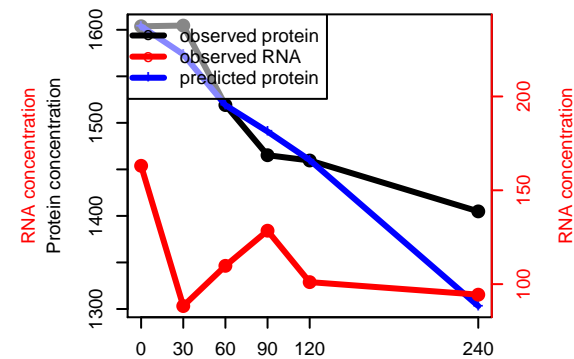

Time (min)  
ks = 0.036546136084441 kd = 0.00352046868086259

CDC60

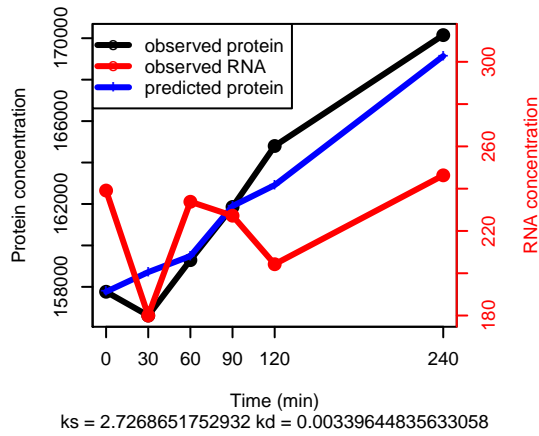

YPL199C

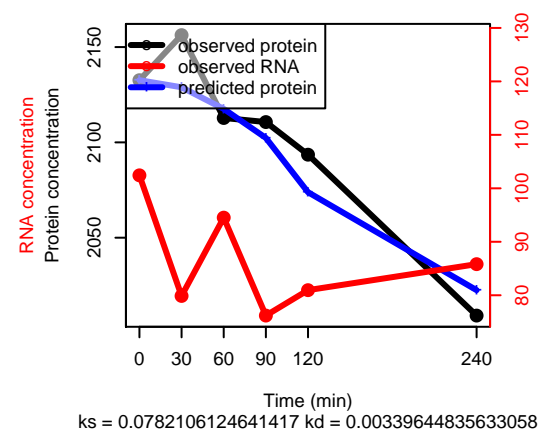

SRP68

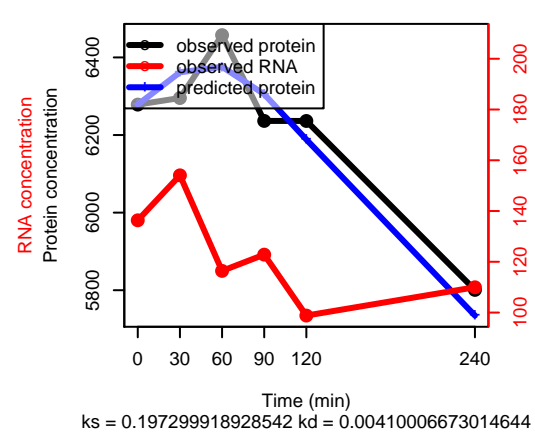

GLN1

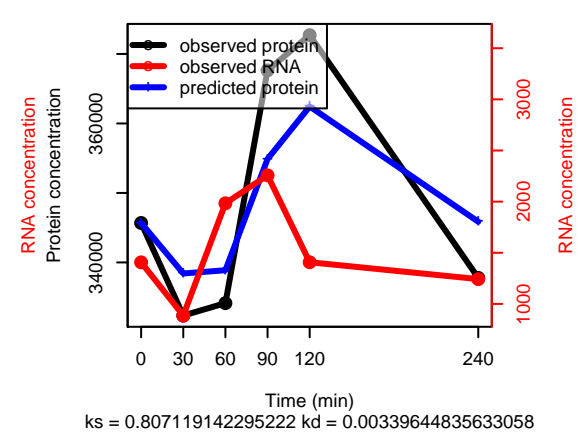

RPL43A

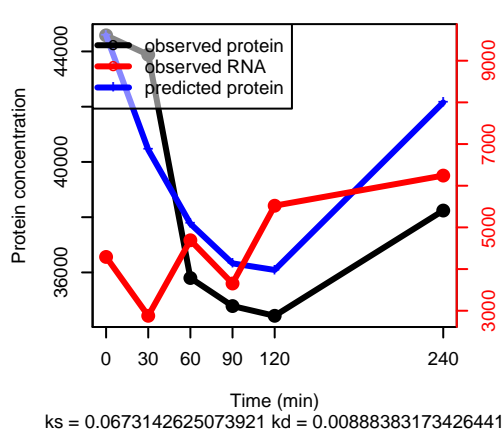

FCY1

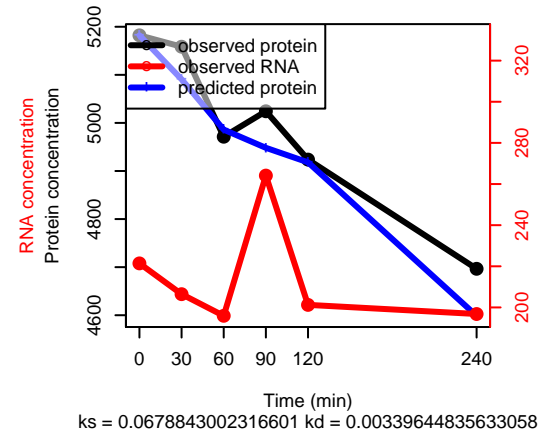

MRI1

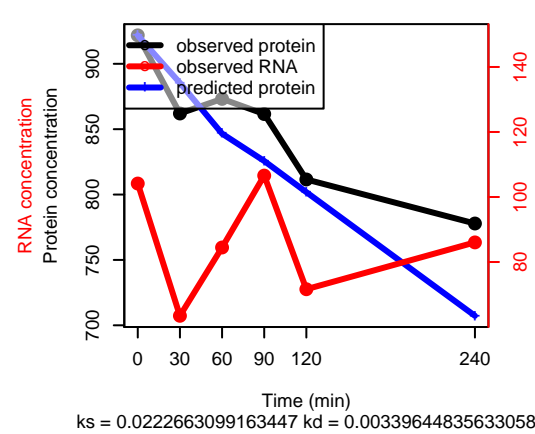

OLA1

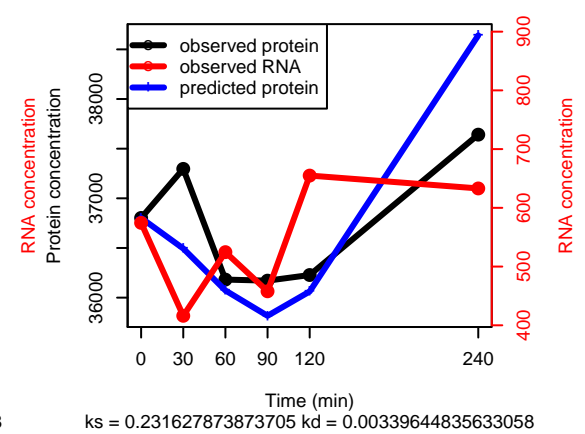

MCX1

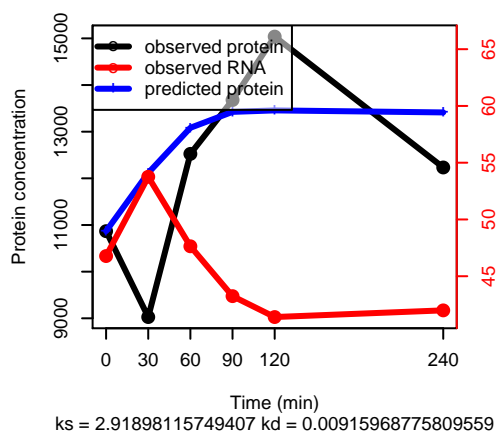

ISW1

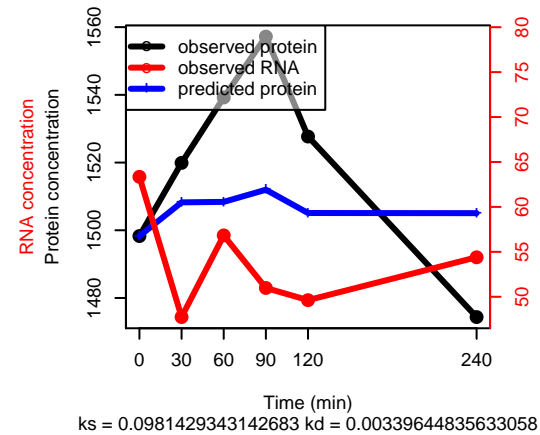

KRR1

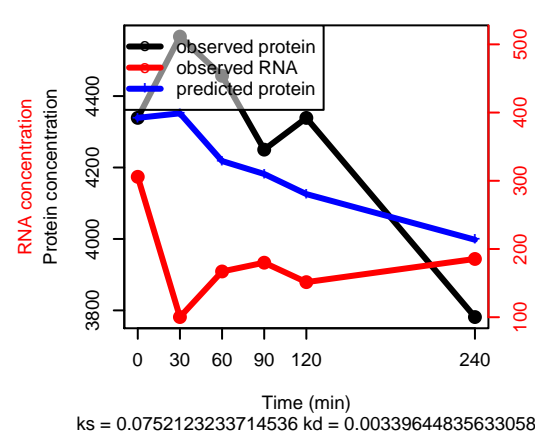

PWP2

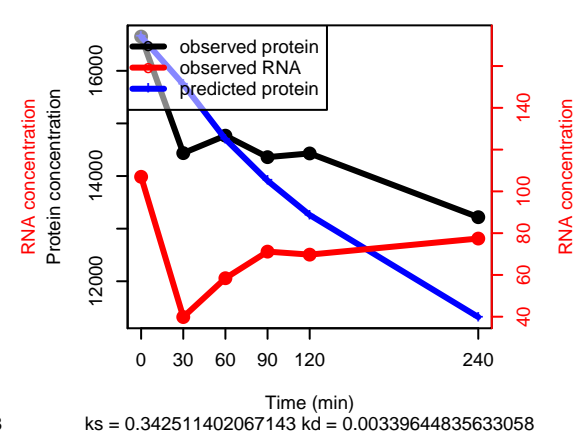

MDH3

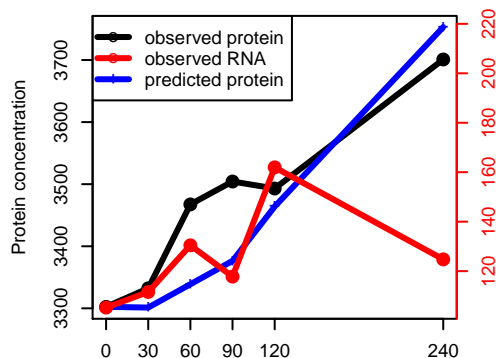

MAK21

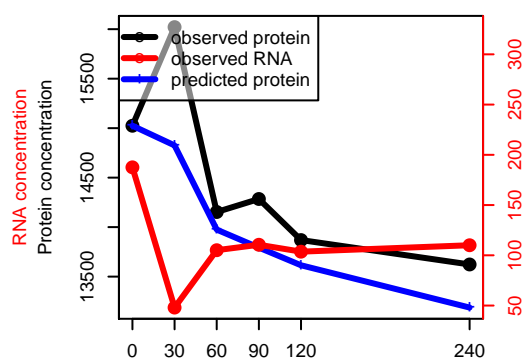

BCP1

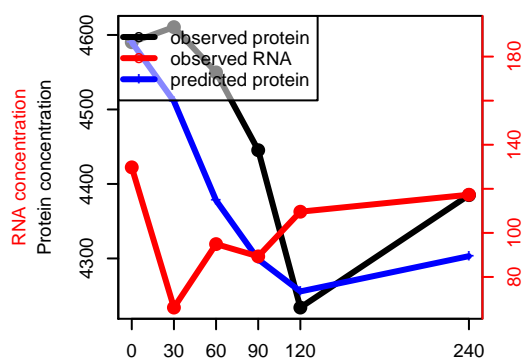

KAP123

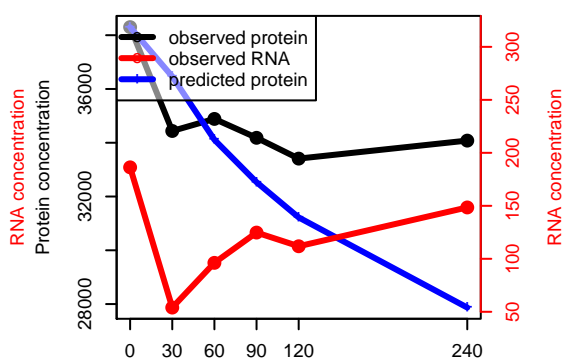

UTP8

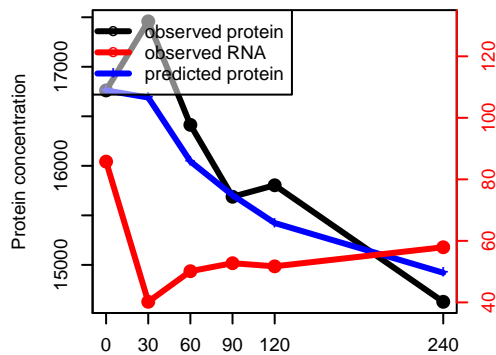

MSC7

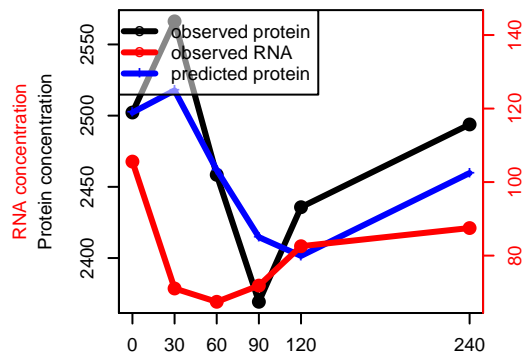

CIC1

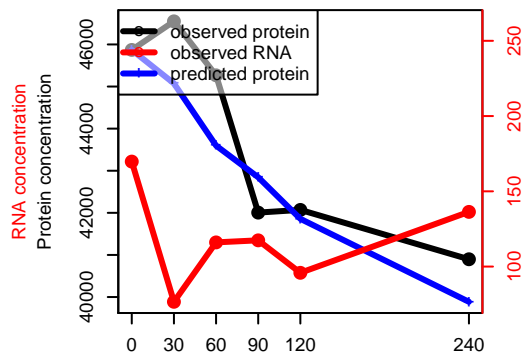

SSF1

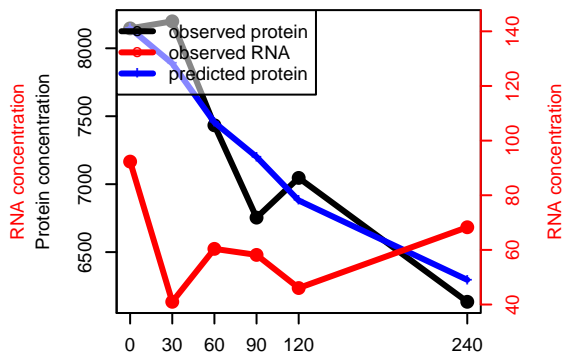

CKA1

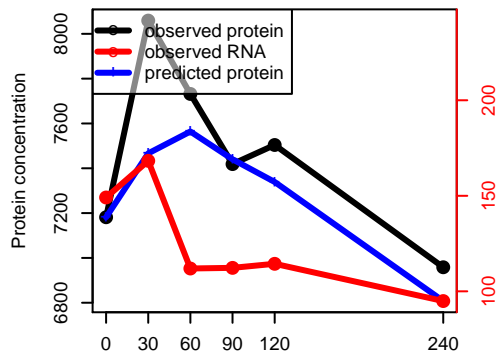

ADO1

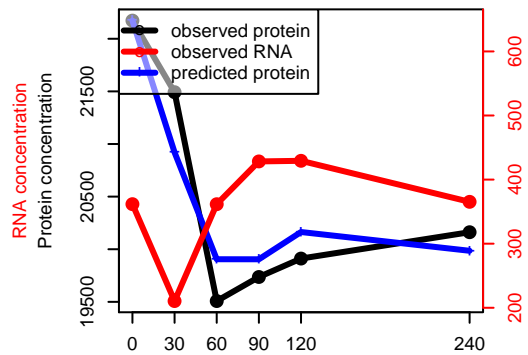

TEF4

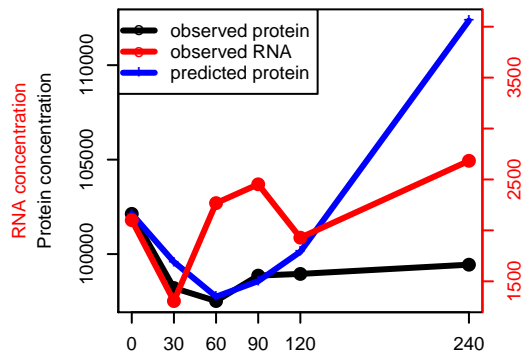

ALT1

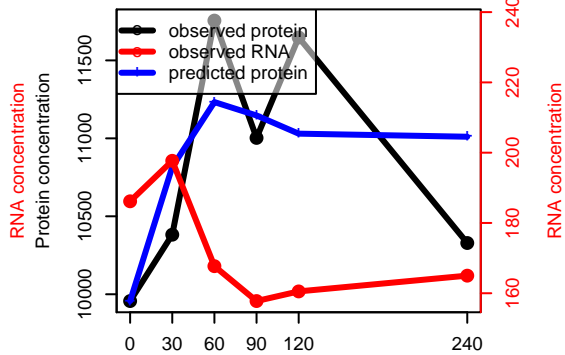



DIP2

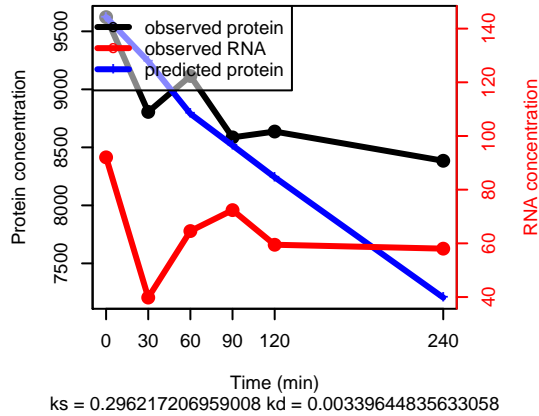

NOP56

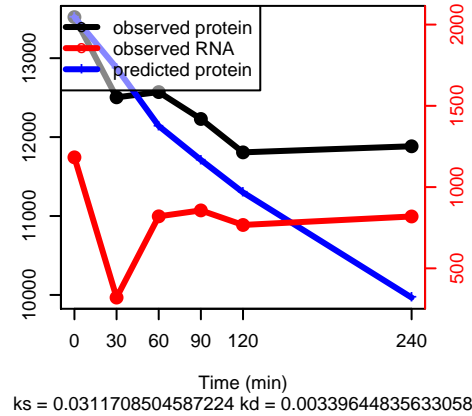

IKI3

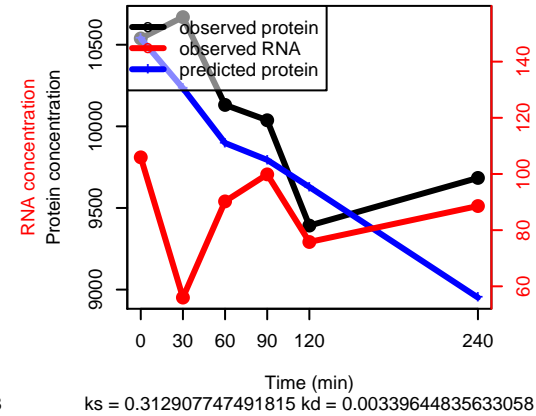

ERB1

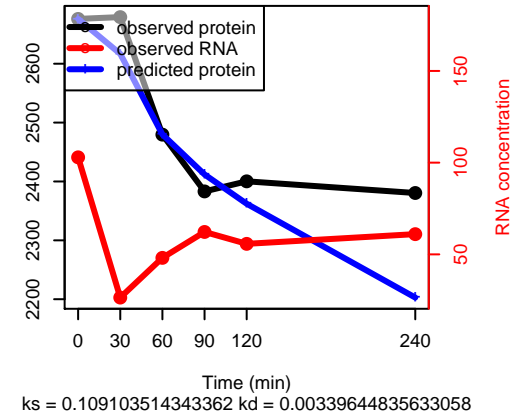

POL1

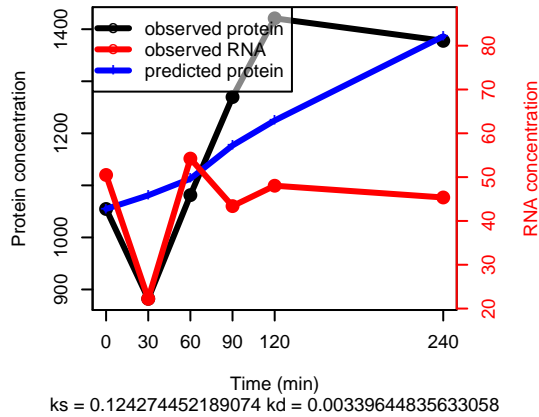

RPC19

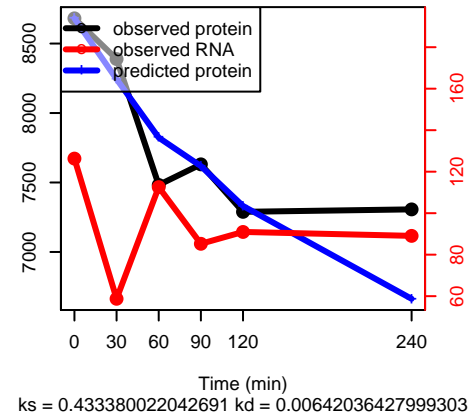

VID27

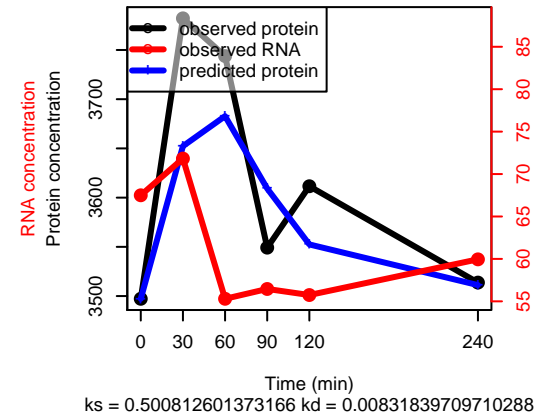

RAP1

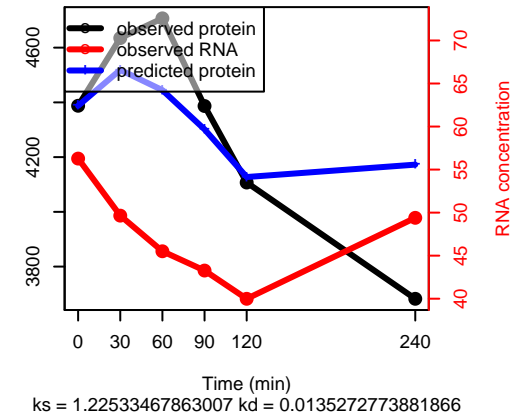

HCH1

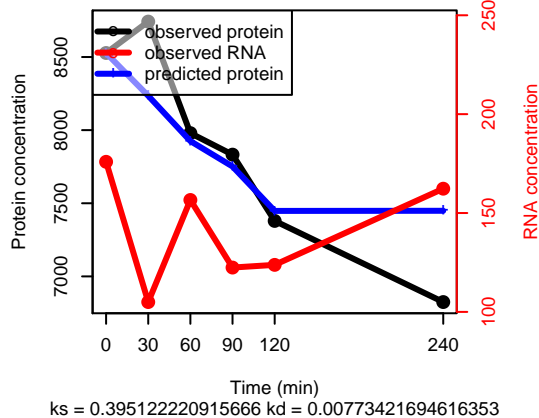

MVD1

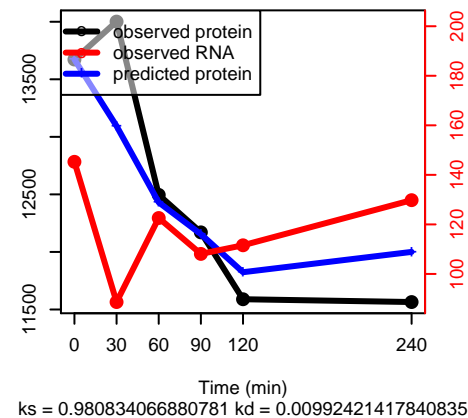

SIN3

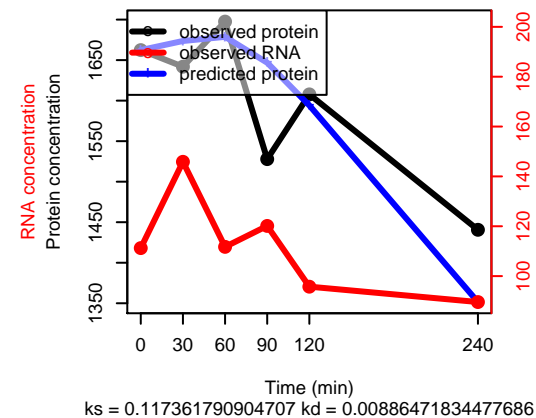

RCL1

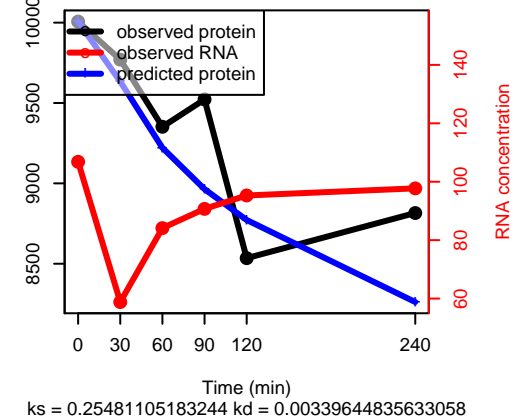

SGT2

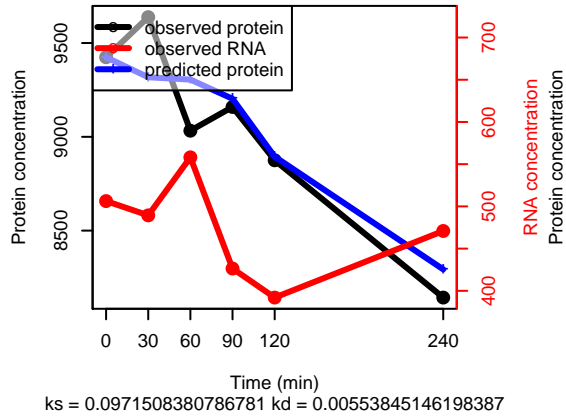

FSF1

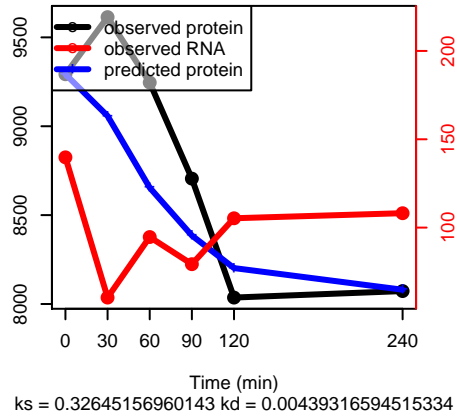

MYO2

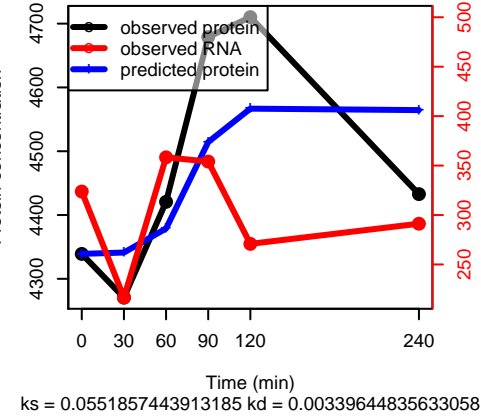

NOP4

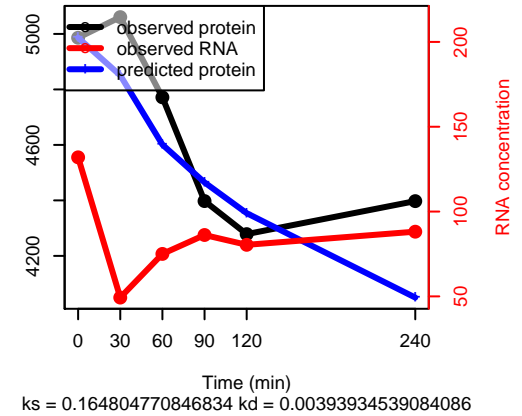

YAR1

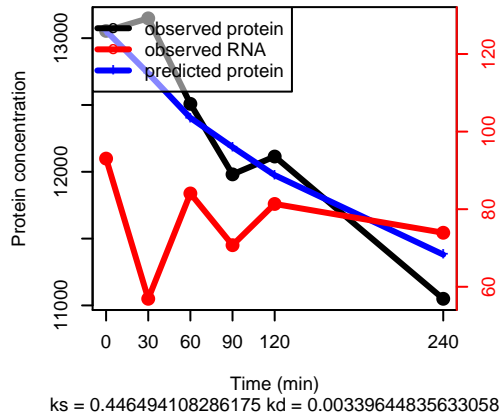

SKI3

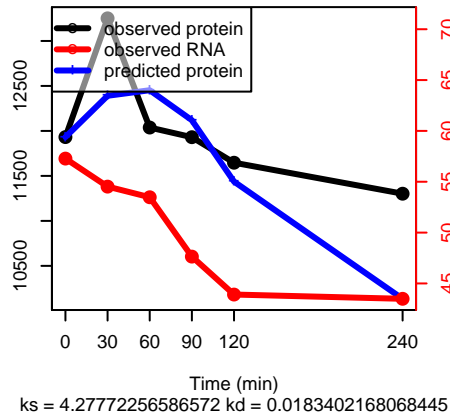

ADE1

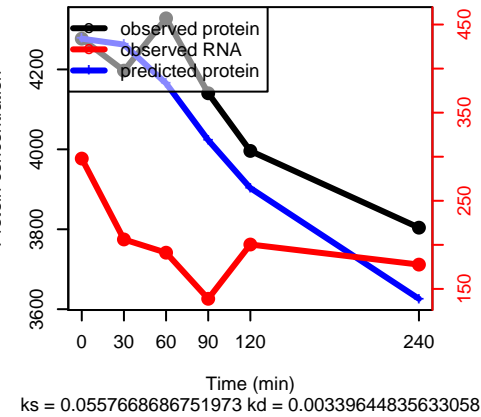

MIS1

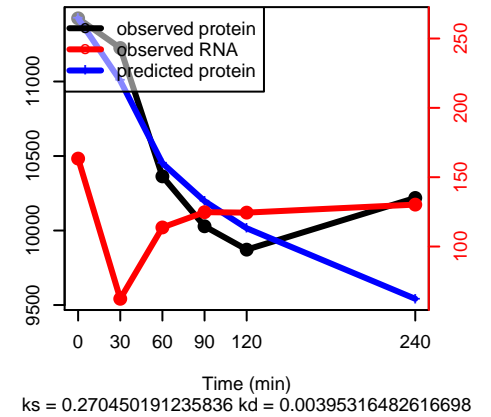

FES1

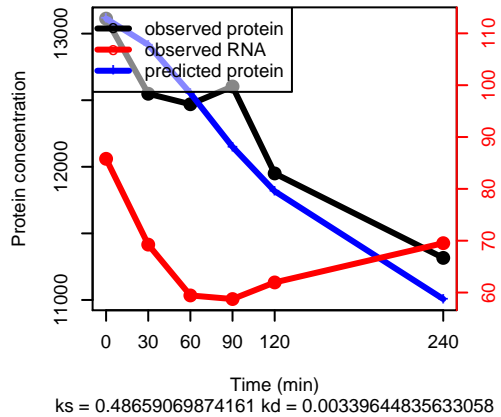

ENP1

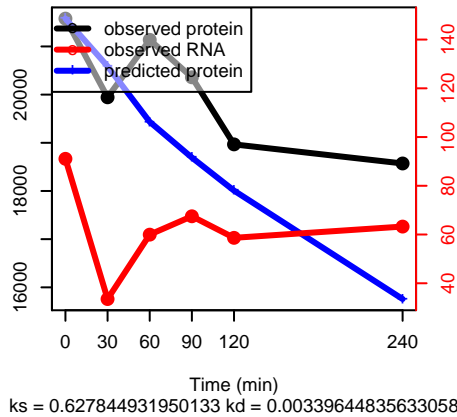

RSC6

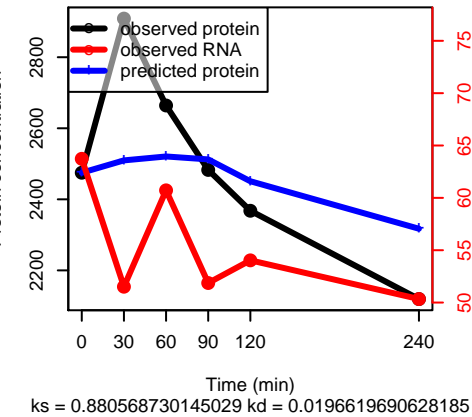

PEX19

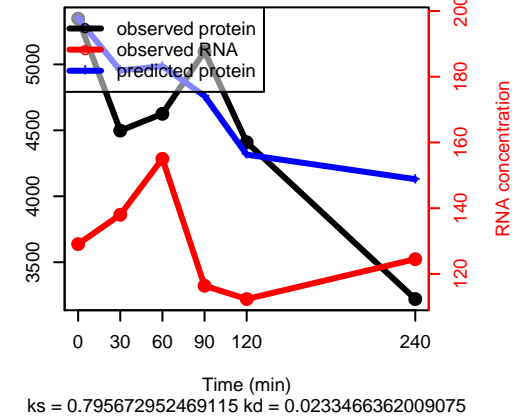

GET3

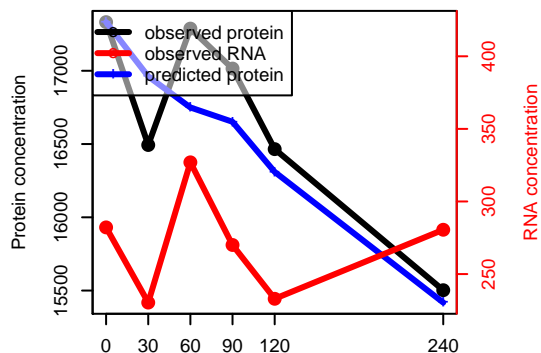

Time (min)  
ks = 0.179310138315108 kd = 0.00339644835633058

RRP8

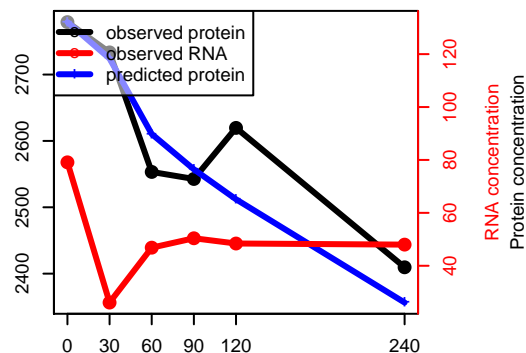

Time (min)  
ks = 0.143553977943922 kd = 0.00339644835633058

YDR089W

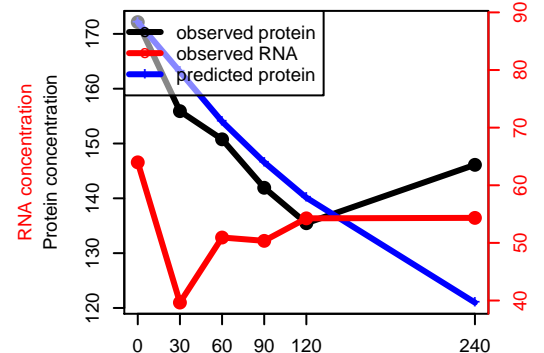

Time (min)  
ks = 0.00518533045556087 kd = 0.00339644835633058

RVB1

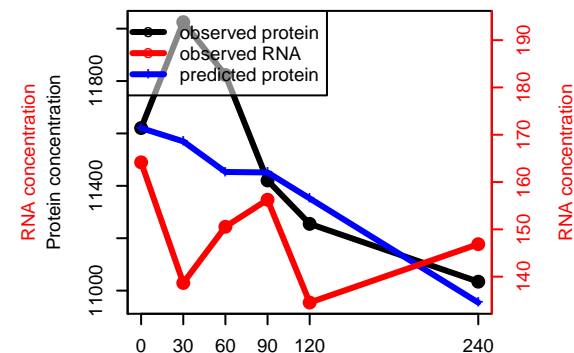

Time (min)  
ks = 0.424079813669896 kd = 0.0056711128695621

EDC3

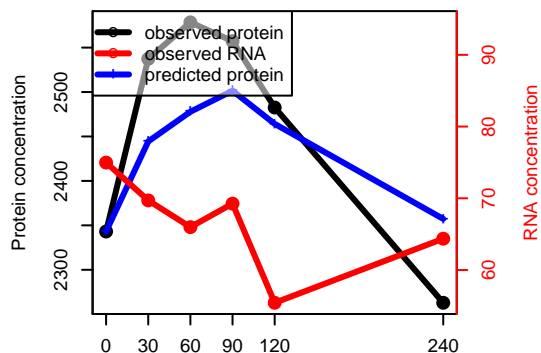

Time (min)  
ks = 0.35847737123422 kd = 0.00940792972935439

NSA2

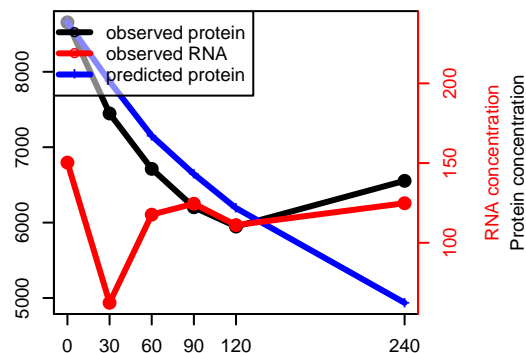

Time (min)  
ks = 0.13857163508239 kd = 0.00489541536199158

CHD1

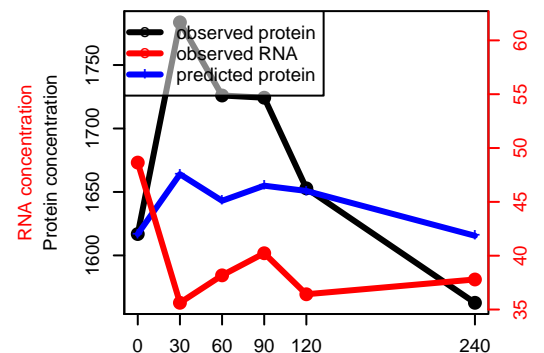

Time (min)  
ks = 0.450438720368585 kd = 0.0104959205510912

DBP3

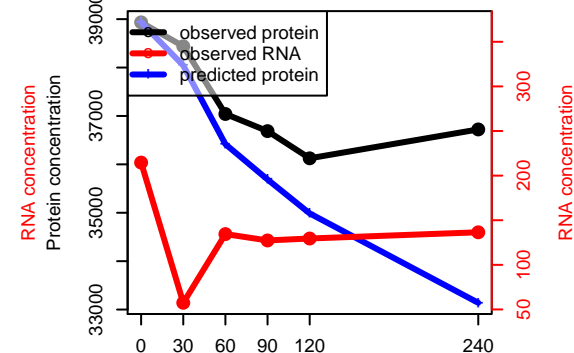

Time (min)  
ks = 0.746829937666613 kd = 0.00339644835633058

NSA1

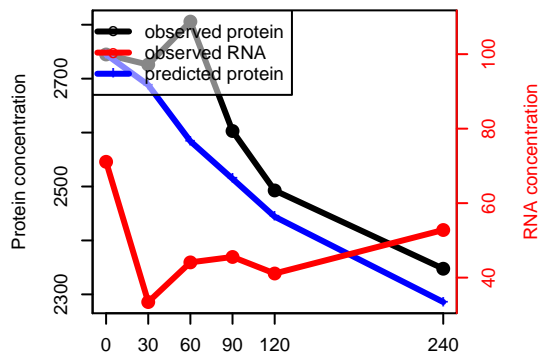

Time (min)  
ks = 0.140740325902604 kd = 0.00339644835633058

PBP1

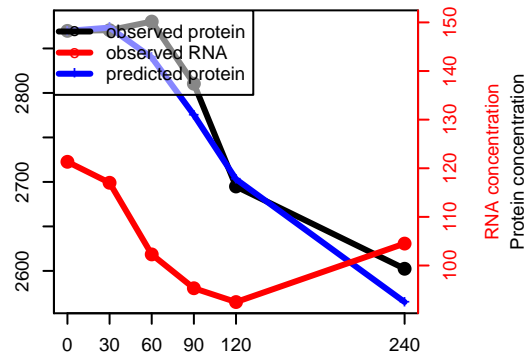

Time (min)  
ks = 0.126864110314166 kd = 0.00521834121522954

YGR210C

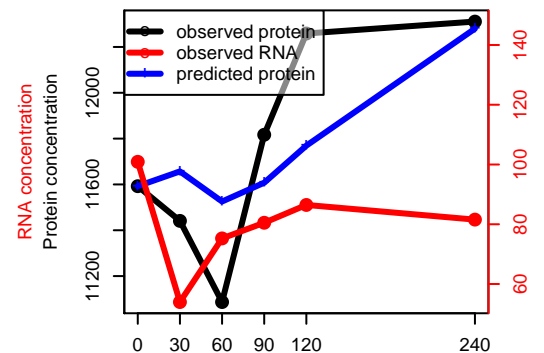

Time (min)  
ks = 0.539316609618626 kd = 0.00339644835633058

ZPR1

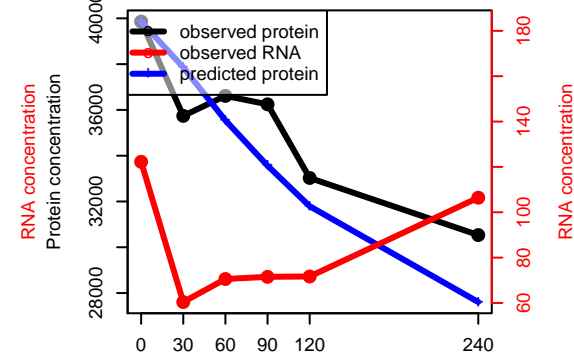

Time (min)  
ks = 0.722744406832663 kd = 0.00339644835633058

BAT1

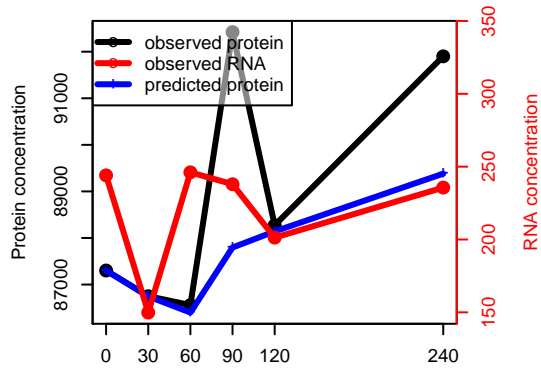

Time (min)  
ks = 1.41730605909778 kd = 0.00339644835633058

PHO12

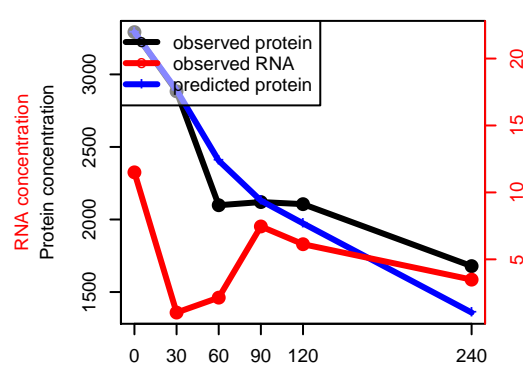

Time (min)  
ks = 1.32703684360911 kd = 0.00694069338797422

ASG1

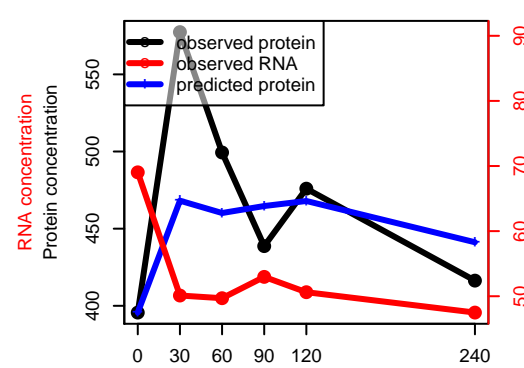

Time (min)  
ks = 0.234122395710843 kd = 0.0257853865133047

PRE3

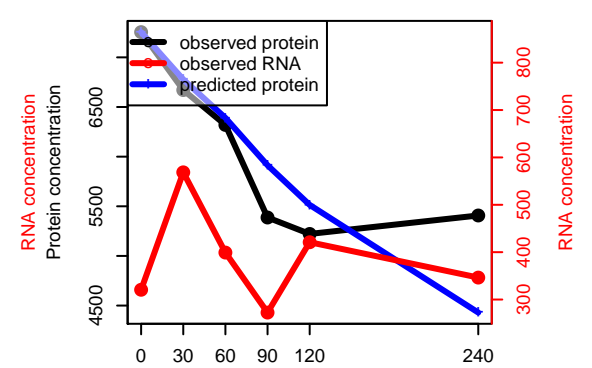

Time (min)  
ks = 0.0314272214212217 kd = 0.00426207128669377

ASF1

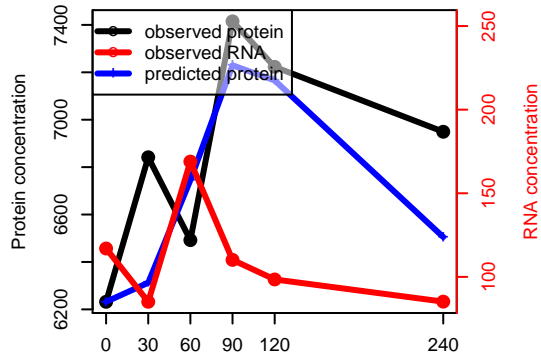

Time (min)  
ks = 0.483747285508333 kd = 0.00732688889969506

RPS14B

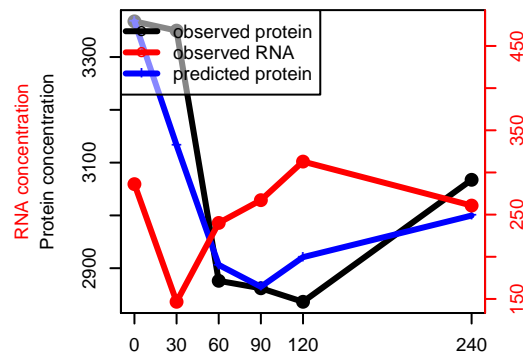

Time (min)  
ks = 0.0865309019752865 kd = 0.0081124805504131

YJR003C

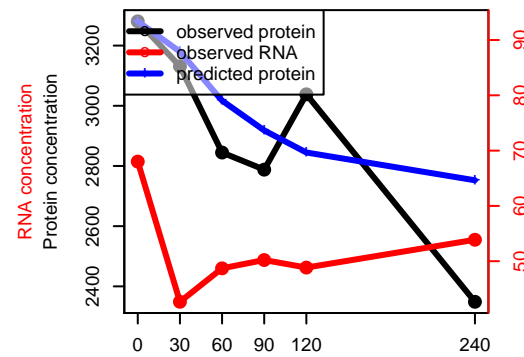

Time (min)  
ks = 0.312367176962414 kd = 0.00636497984822735

RPA12

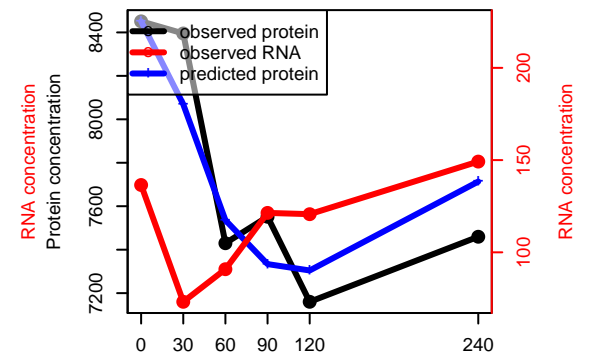

Time (min)  
ks = 0.361517922808866 kd = 0.00610139454811419

LIA1

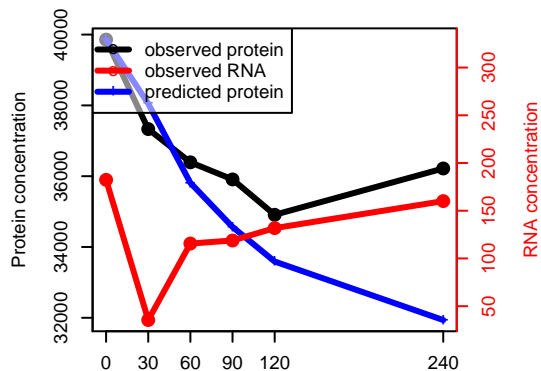

Time (min)  
ks = 0.664322185457335 kd = 0.00339644835633058

HOM6

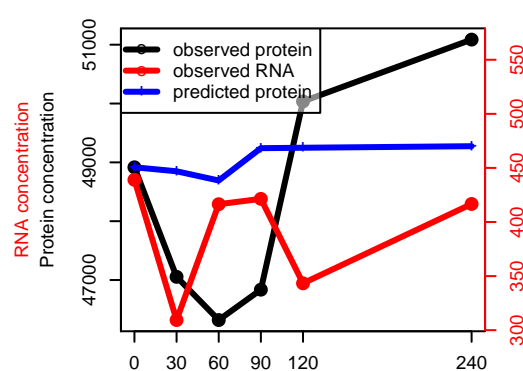

Time (min)  
ks = 0.440459153273962 kd = 0.00339644835633058

MAE1

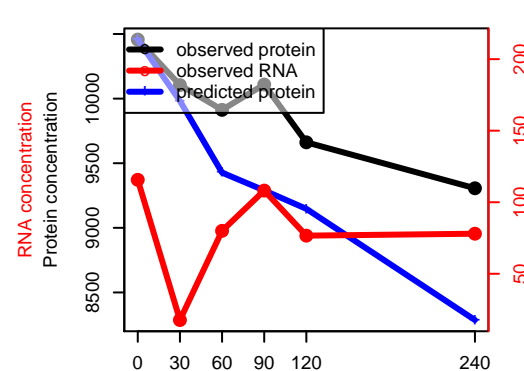

Time (min)  
ks = 0.288012397806647 kd = 0.00339644835633058

SRP21

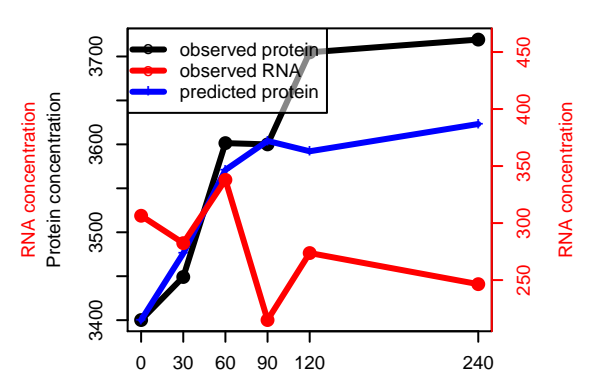

Time (min)  
ks = 0.0483023990564658 kd = 0.00339644835633058

PGM1

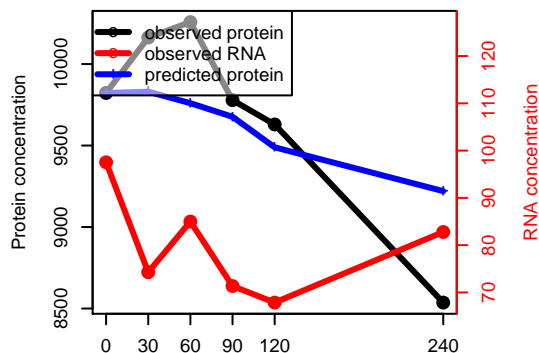

Time (min)  
ks = 0.474482872632784 kd = 0.00410304564808962

FYV7

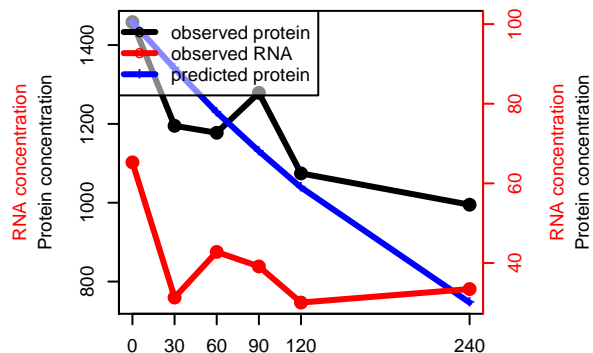

Time (min)  
ks = 0.0176934787661592 kd = 0.00339644835633058

ACO1

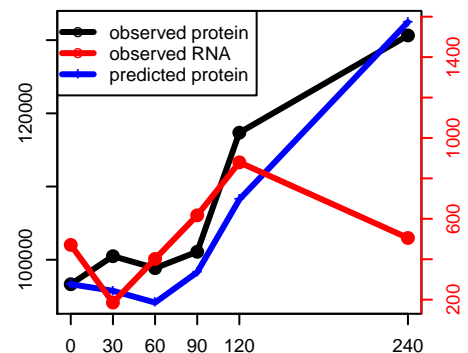

Time (min)  
ks = 0.907973641613747 kd = 0.00339644835633058

SKI2

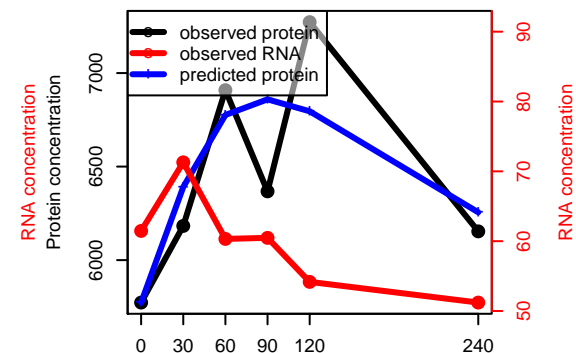

Time (min)  
ks = 1.47325628527263 kd = 0.0127203885305588

IMD3

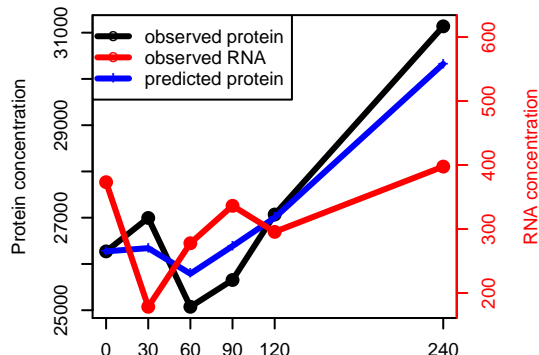

Time (min)  
ks = 0.497751281175897 kd = 0.00509116384063893

APT1

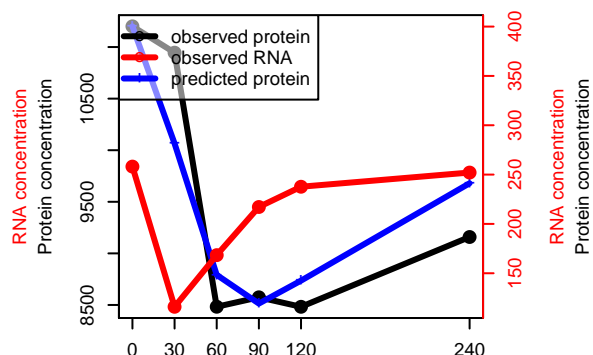

Time (min)  
ks = 0.480836836973696 kd = 0.0118837184946252

RPS18B

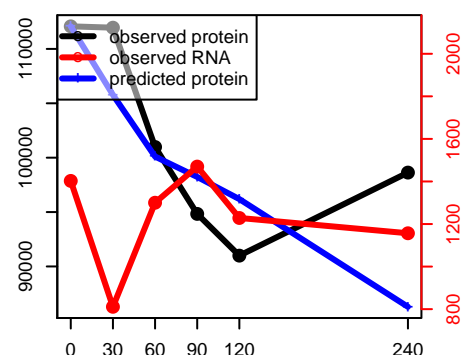

Time (min)  
ks = 0.335726006520381 kd = 0.00532874320786094

ADE17

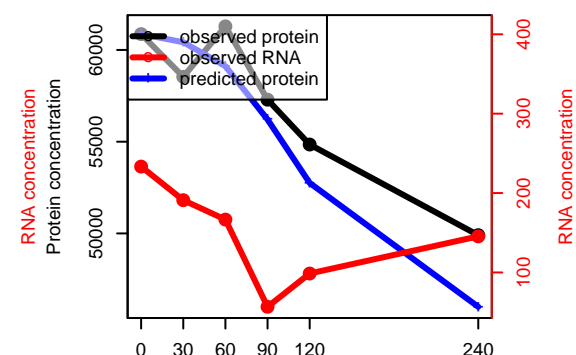

Time (min)  
ks = 0.90268832657878 kd = 0.00339644835633058

RRP6

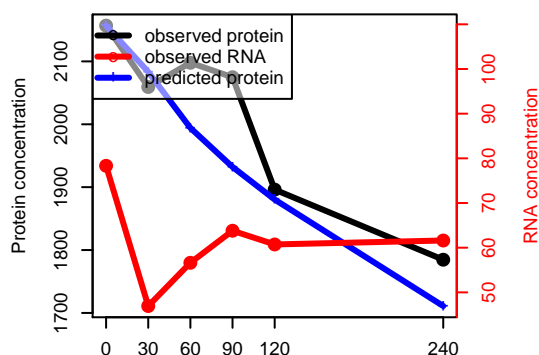

Time (min)  
ks = 0.0762393618385345 kd = 0.00339644835633058

PUS7

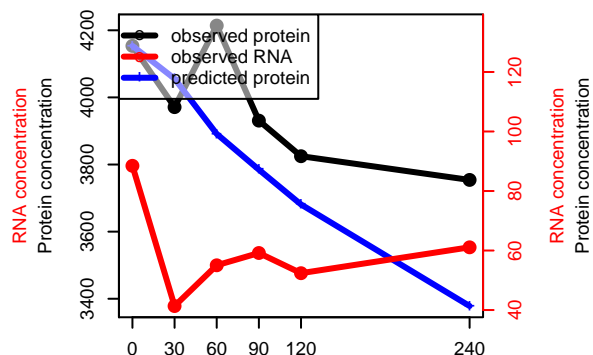

Time (min)  
ks = 0.164857125719985 kd = 0.00339644835633058

ERG10

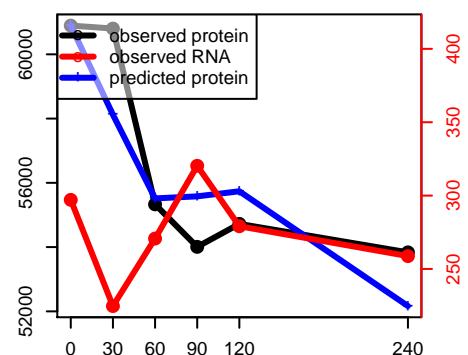

Time (min)  
ks = 1.62798839439053 kd = 0.00866707479888291

AIM45

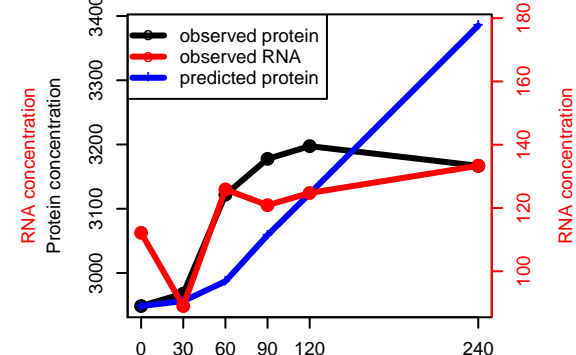

Time (min)  
ks = 0.102608610629426 kd = 0.00339644835633058

TIF6

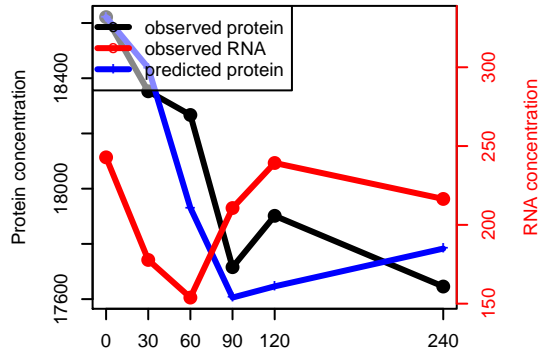

Time (min)  
ks = 0.270954303445645 kd = 0.00339644835633058

OPY2

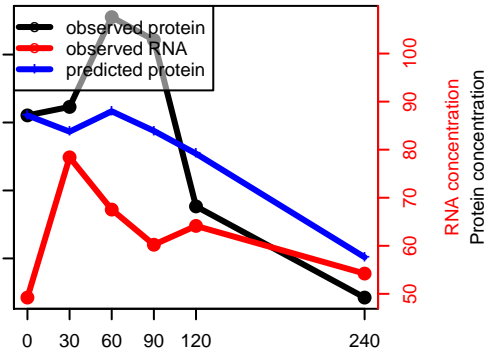

Time (min)  
ks = 0.108148479577074 kd = 0.00640890945675313

RPL11A

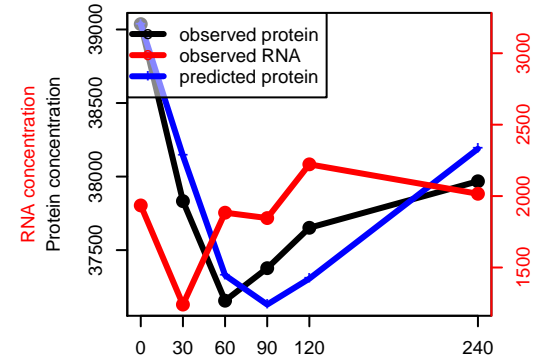

Time (min)  
ks = 0.0642262002579657 kd = 0.00339644835633058

MRD1

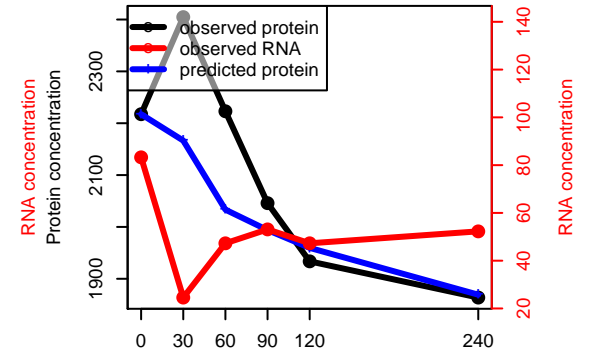

Time (min)  
ks = 0.192106091951723 kd = 0.0054347208315668

NOC4

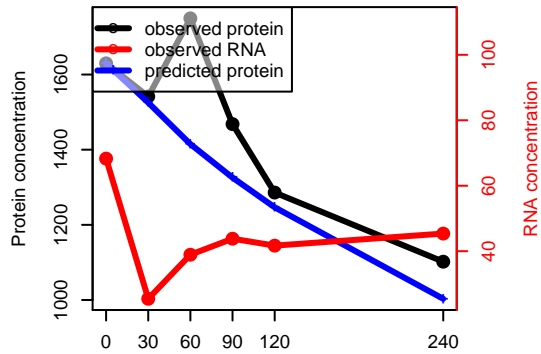

Time (min)  
ks = 0.0403854596507458 kd = 0.00339644835633058

FUN12

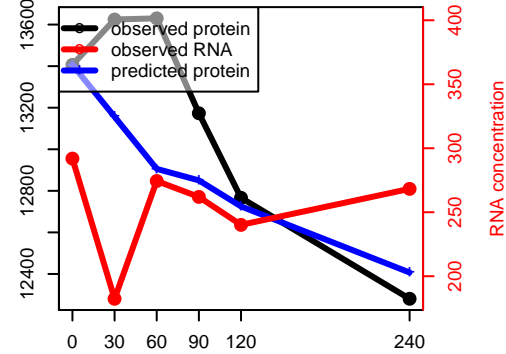

Time (min)  
ks = 0.156289983867525 kd = 0.00339644835633058

MAK5

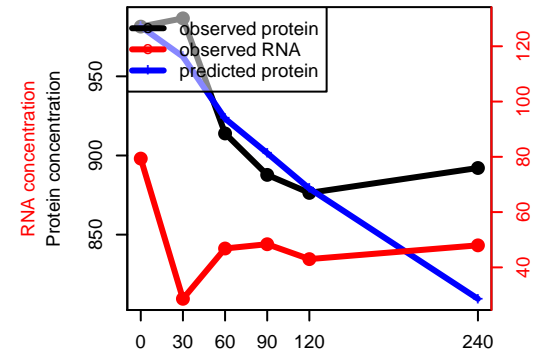

Time (min)  
ks = 0.0496624294782474 kd = 0.00339644835633058

PDB1

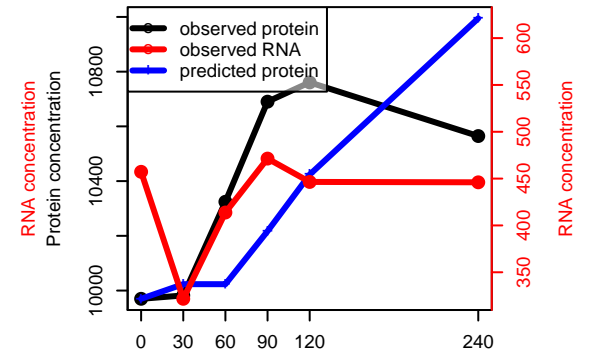

Time (min)  
ks = 0.0923599378547237 kd = 0.00339644835633058

DUT1

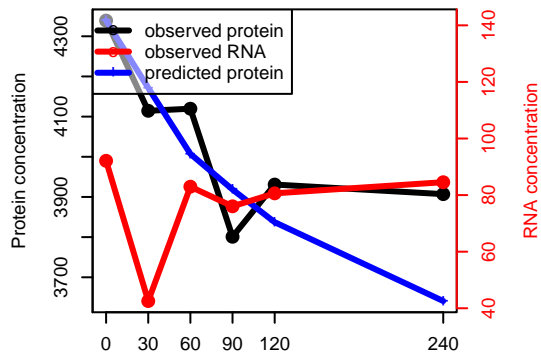

Time (min)  
ks = 0.133072779674842 kd = 0.00339644835633058

USO1

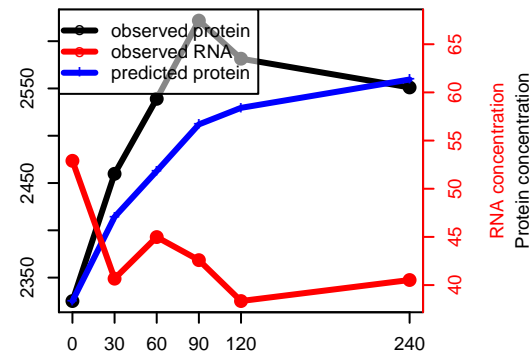

Time (min)  
ks = 0.271263254602328 kd = 0.00409872869325355

TRM3

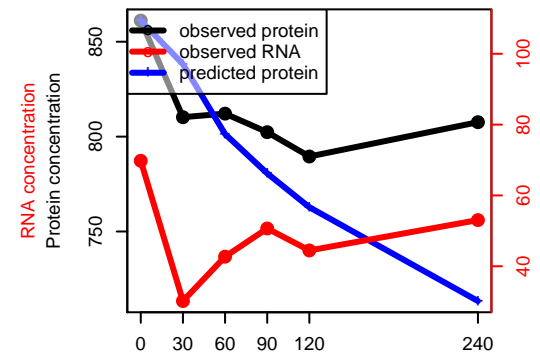

Time (min)  
ks = 0.0425435041012102 kd = 0.00339644835633058

CCT4

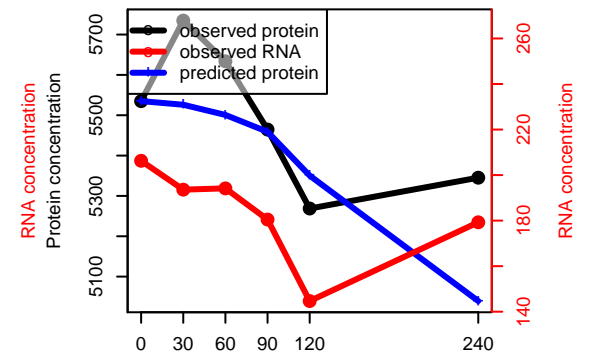

Time (min)  
ks = 0.0925272931574393 kd = 0.00339644835633058



TRM8

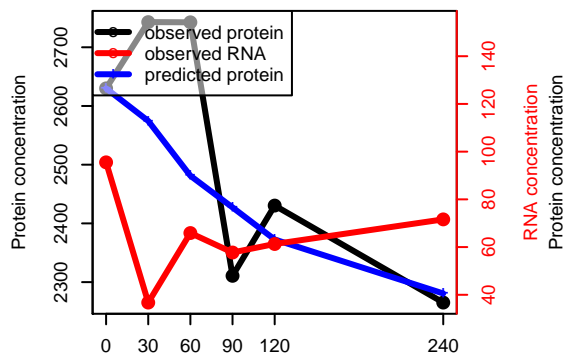

AHA1

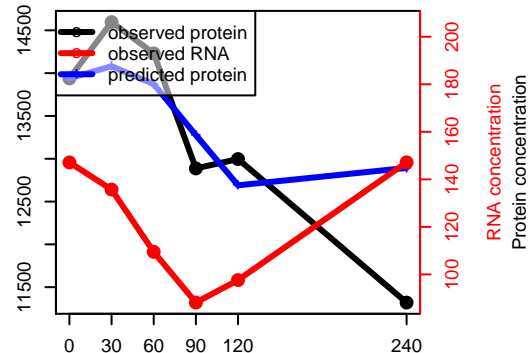

RSC3

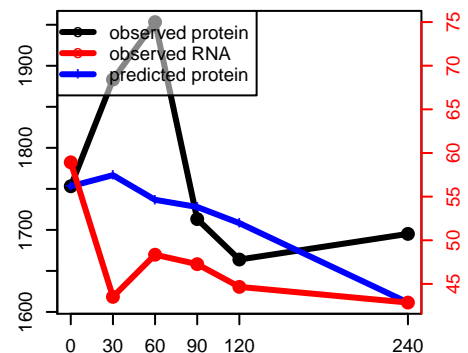

HPT1

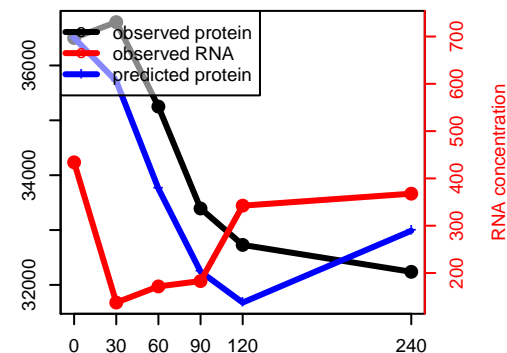

RPL37B

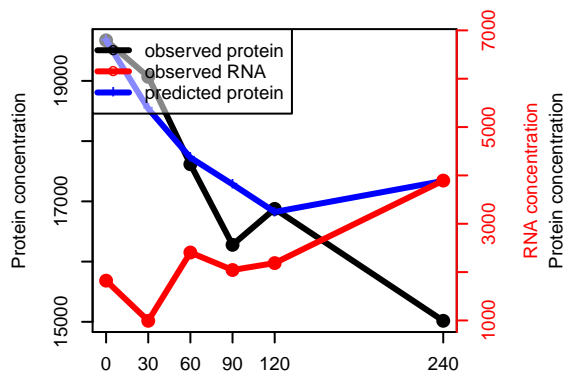

TFG2

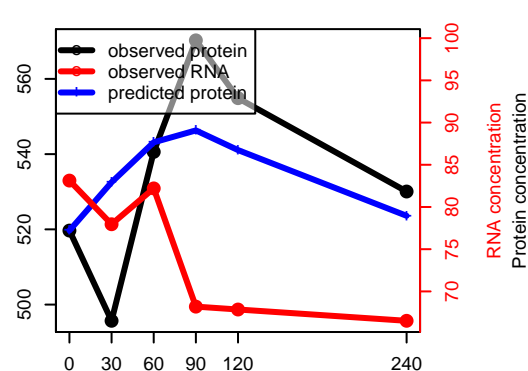

NUP57

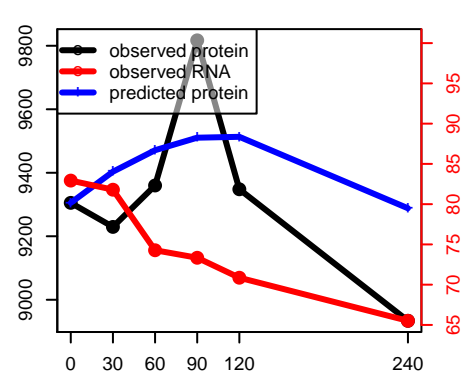

RTT102

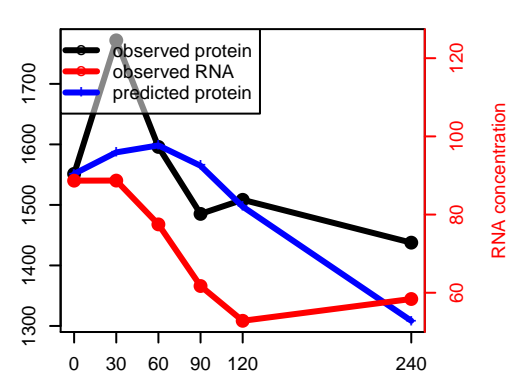

NMD3

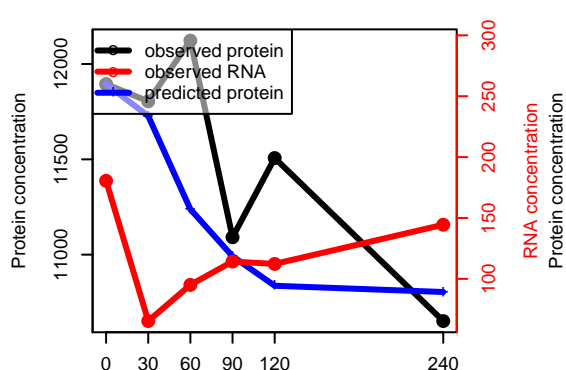

NUP159

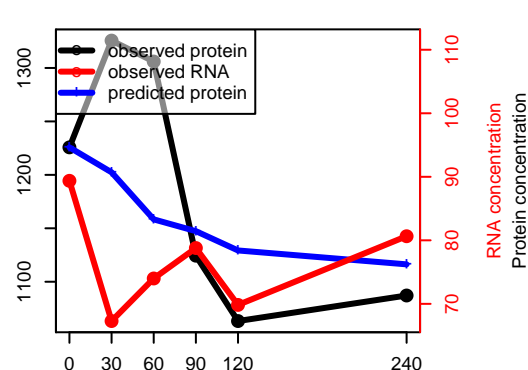

STH1

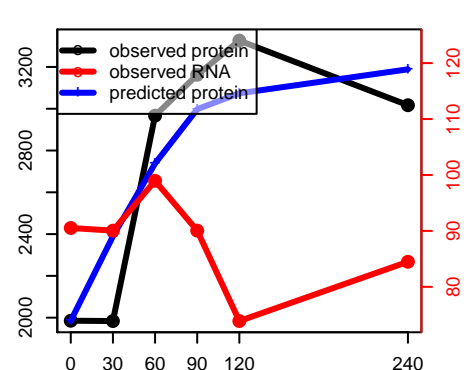

UTP10

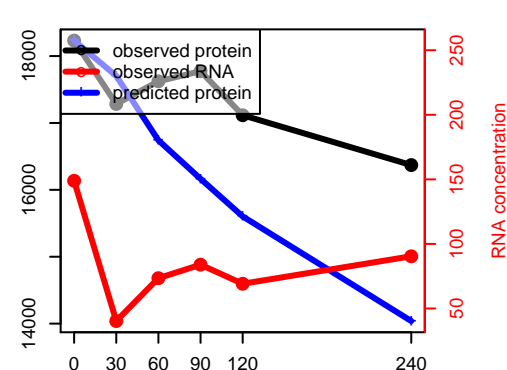

RPE1

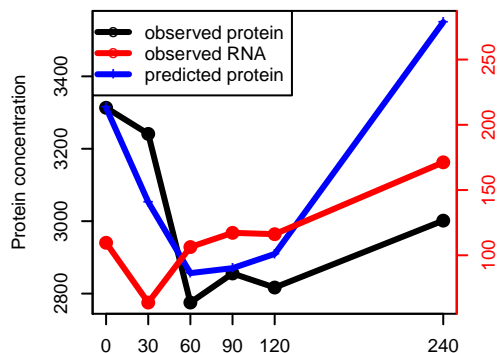

CPR7

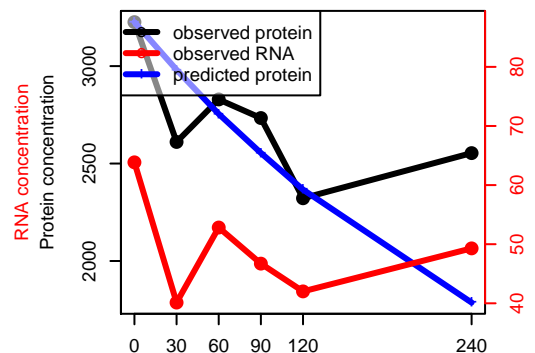

CYC1

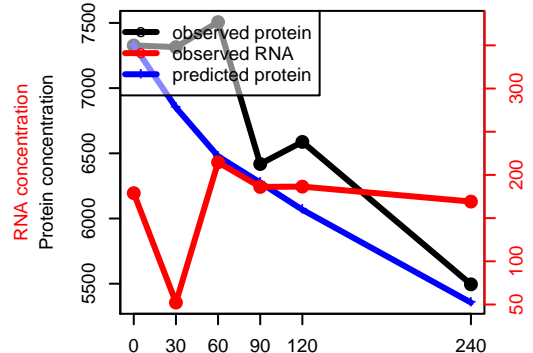

RPL14A

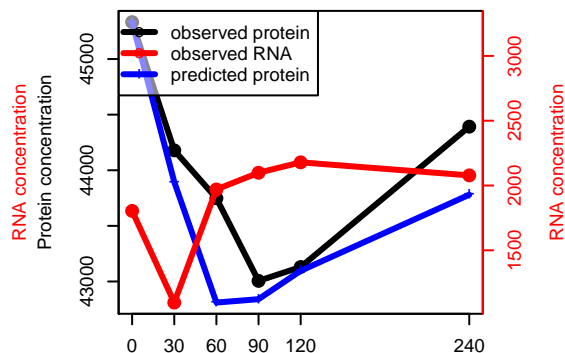

TMA19

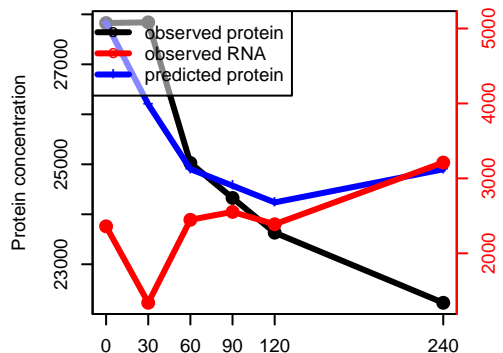

COY1

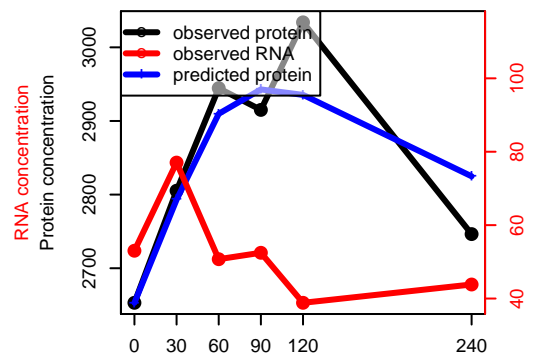

FAS1

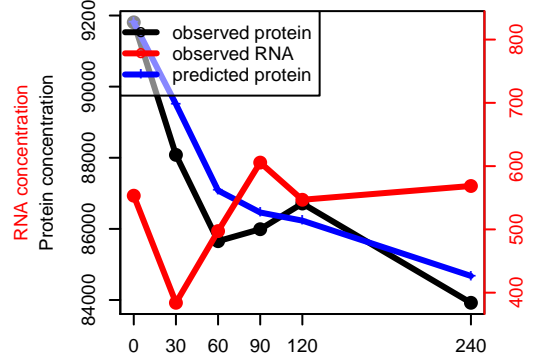

EAP1

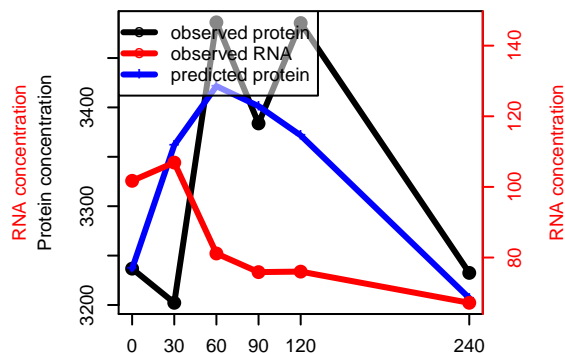

DRE2

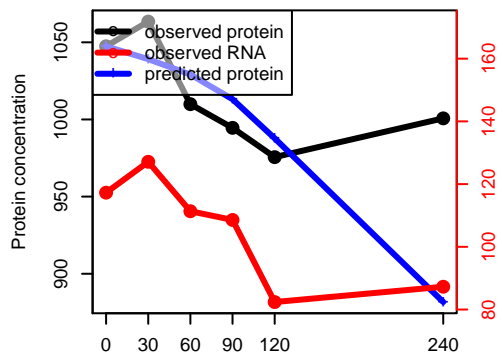

RIX7

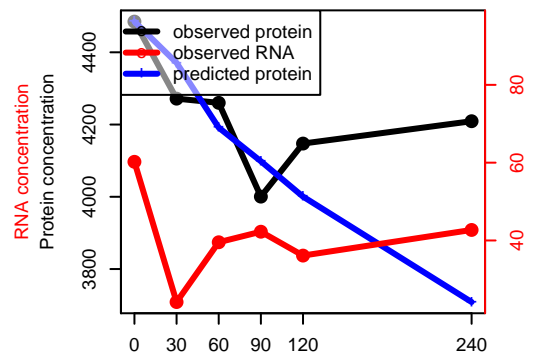

YEF3

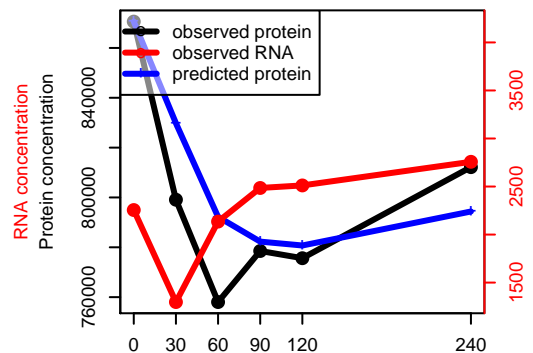

SEC61

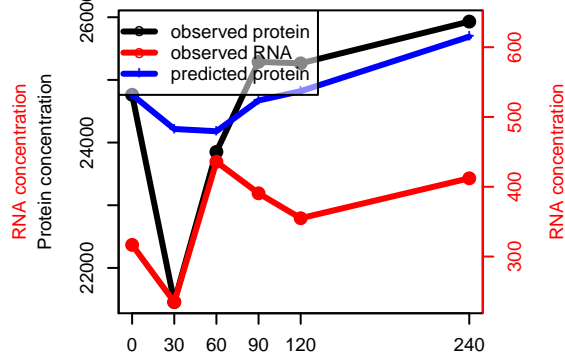

MVP1

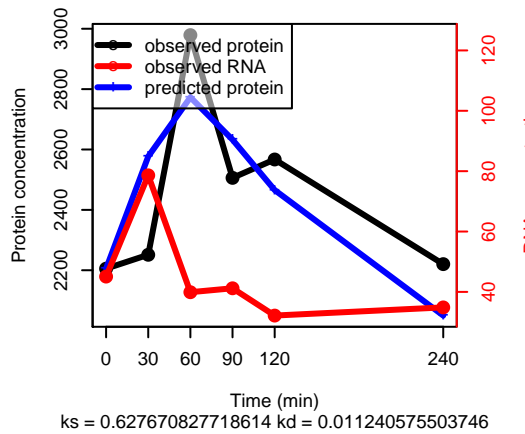

RPL36A

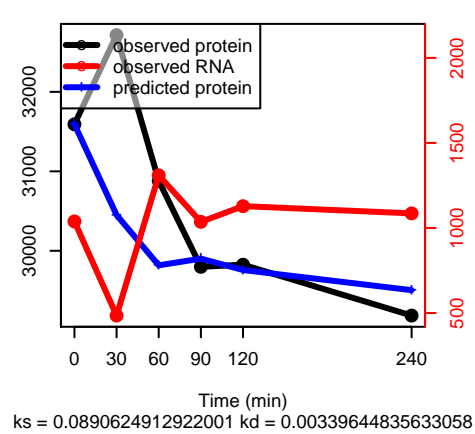

RIA1

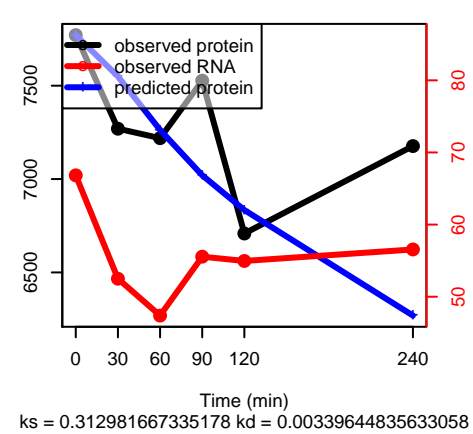

GIS2

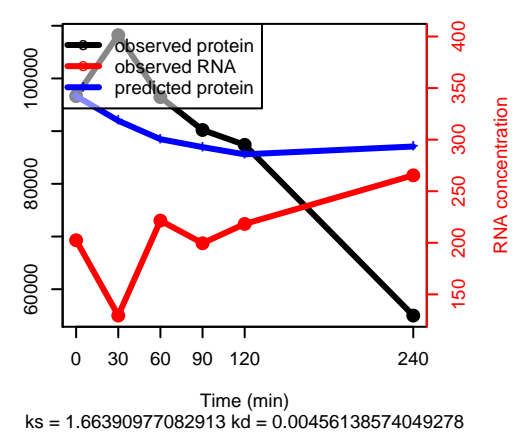

DIS3

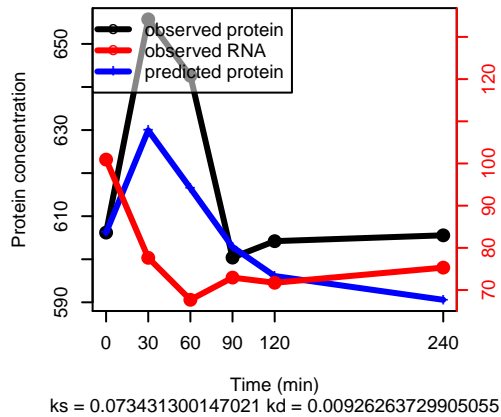

MDM38

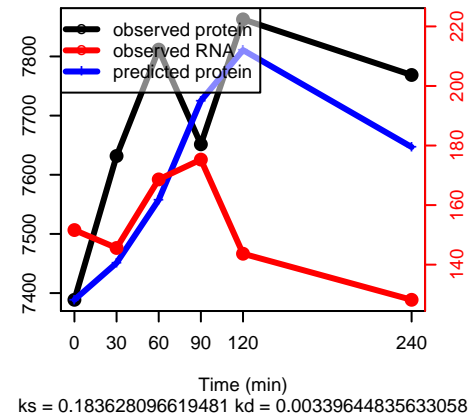

NOP12

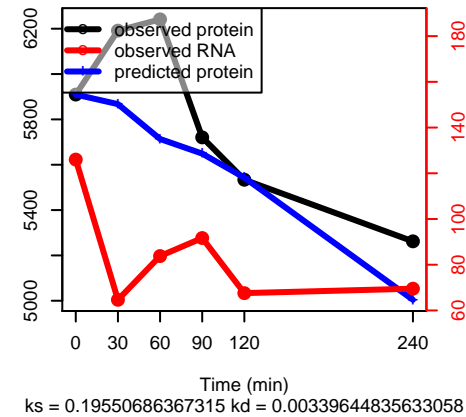

PRS5

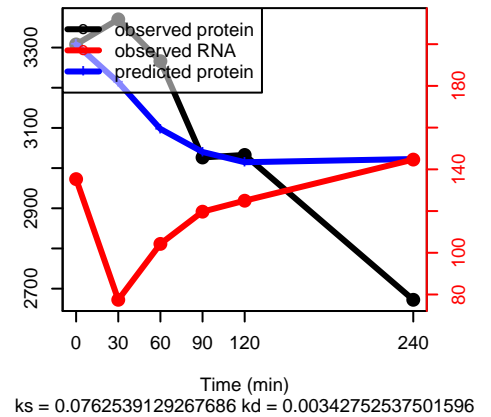

PUP1

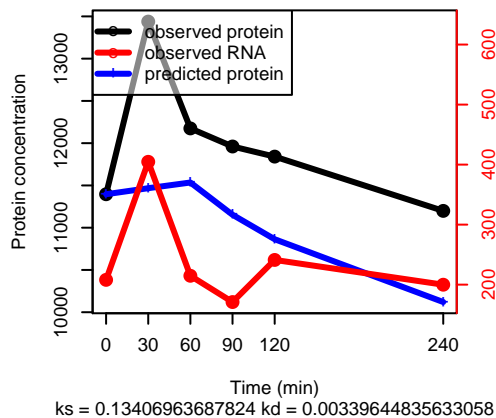

SLK19

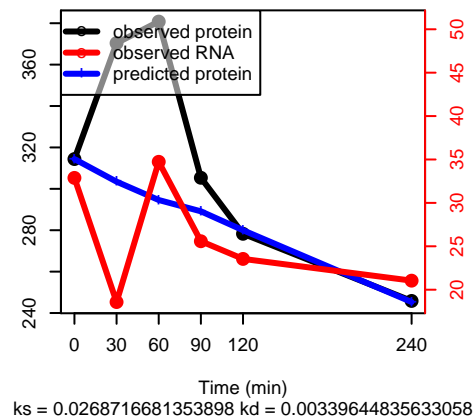

NOC2

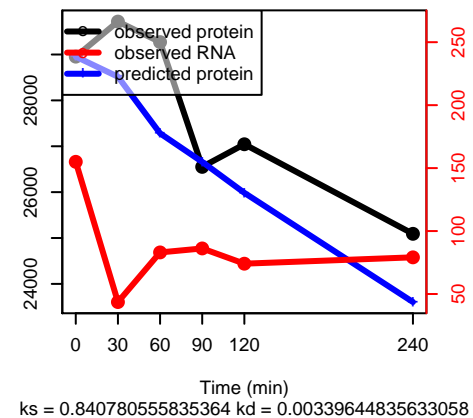

RET1

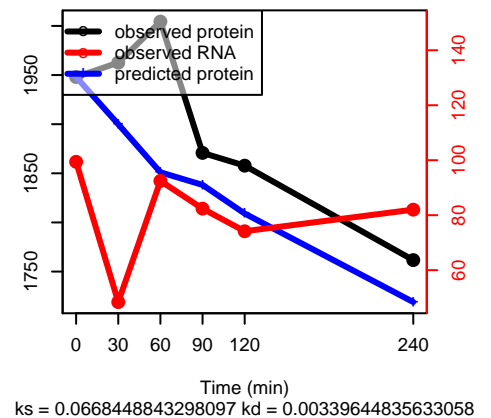

TMA16

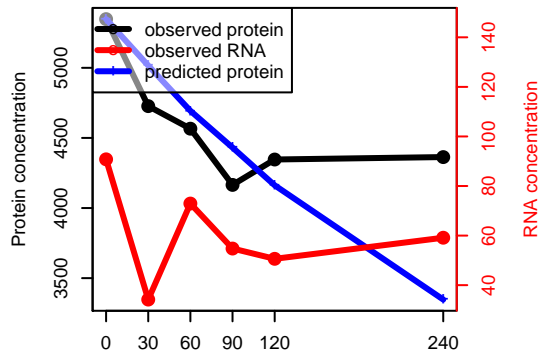

Time (min)  
ks = 0.106119306939458 kd = 0.00339644835633058

YTM1

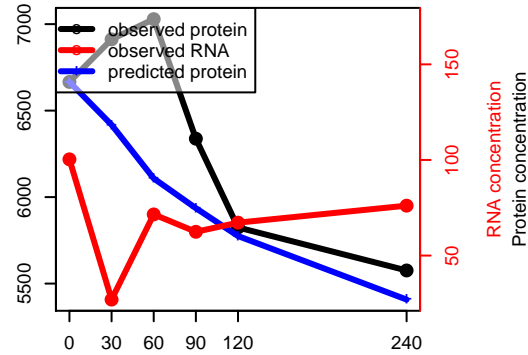

Time (min)  
ks = 0.220290719146323 kd = 0.00339644835633058

VMA4

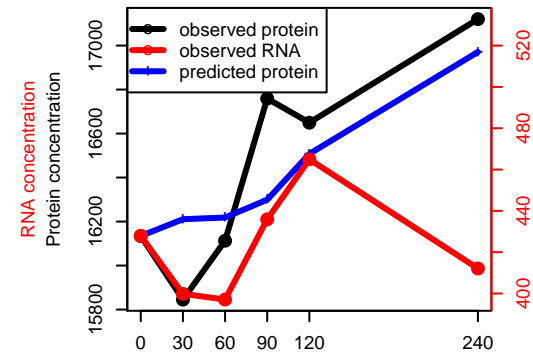

Time (min)  
ks = 0.138978315208153 kd = 0.00339644835633058

PRT1

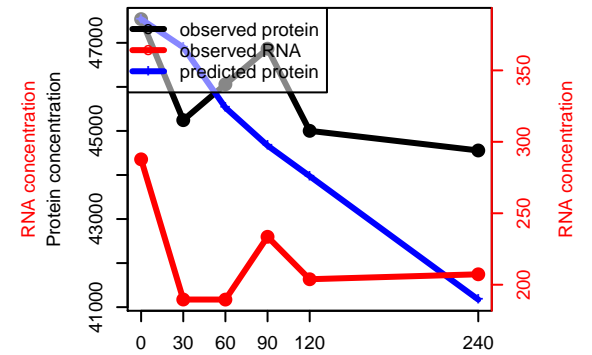

Time (min)  
ks = 0.584421303660695 kd = 0.00339644835633058

YPR097W

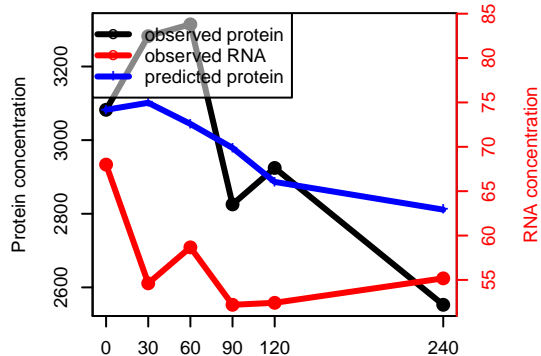

Time (min)  
ks = 0.684426638726602 kd = 0.0132816481081642

PRE2

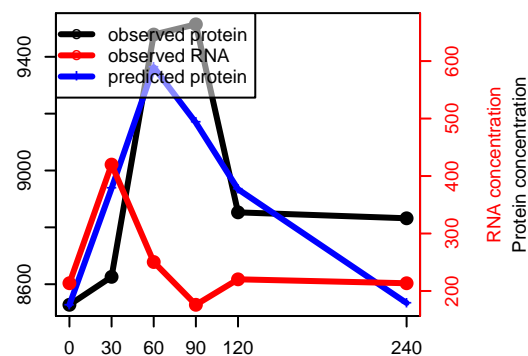

Time (min)  
ks = 0.16706385442956 kd = 0.00452936732059446

TIF3

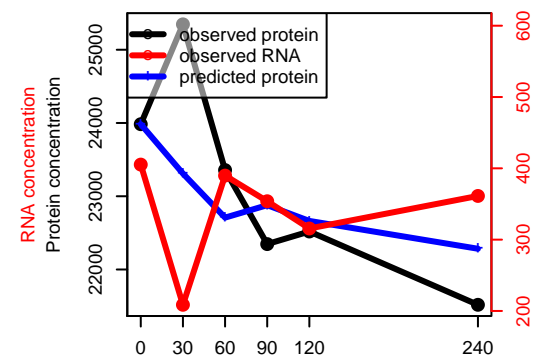

Time (min)  
ks = 0.350754735096177 kd = 0.00547458380937563

PMT2

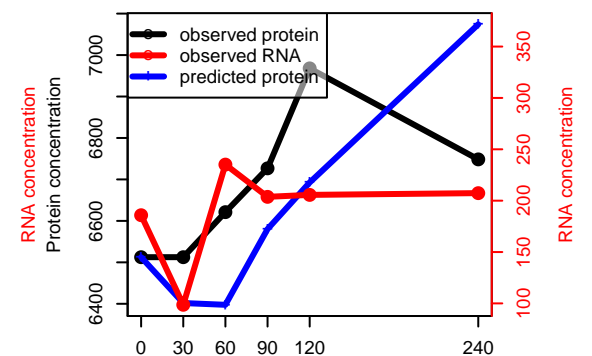

Time (min)  
ks = 0.128436765864078 kd = 0.00339644835633058

BLM10

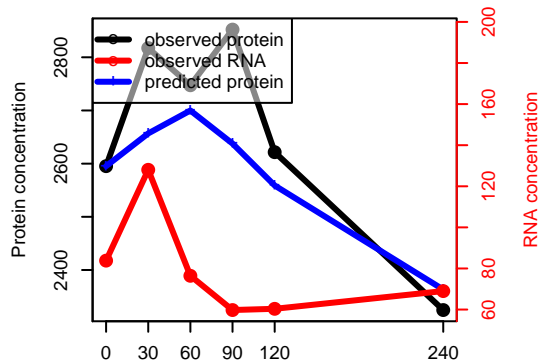

Time (min)  
ks = 0.103463412936638 kd = 0.00339644835633058

LSG1

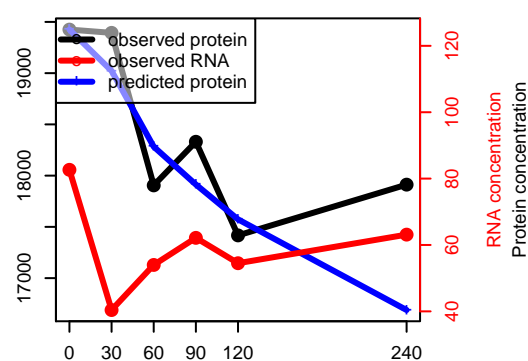

Time (min)  
ks = 0.950029194478713 kd = 0.00372794748278091

ADE5-7

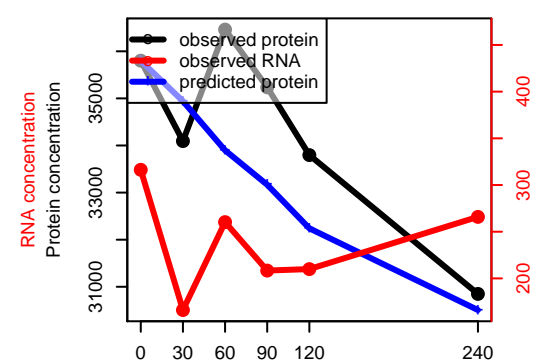

Time (min)  
ks = 0.38280095793031 kd = 0.00339644835633058

ELP2

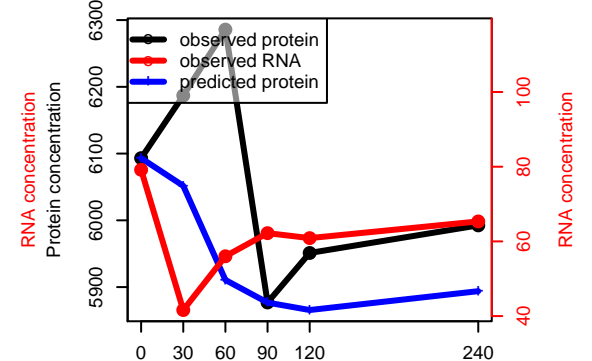

Time (min)  
ks = 0.319384380591393 kd = 0.00339644835633058

SDA1

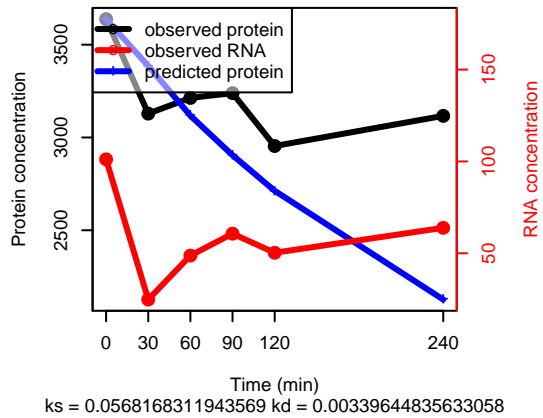

MNN5

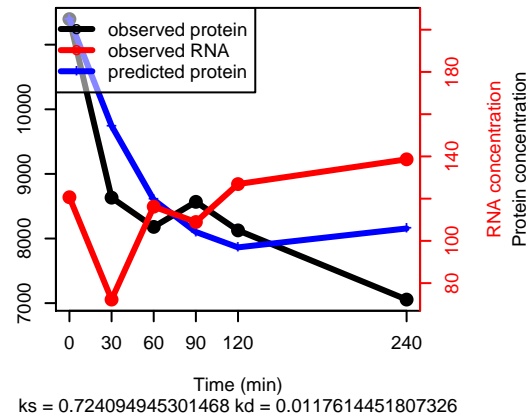

TIF1

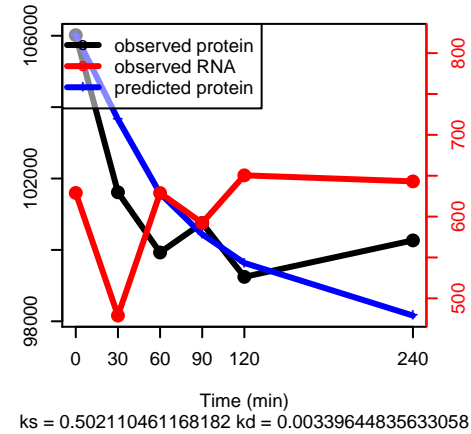

CSR1

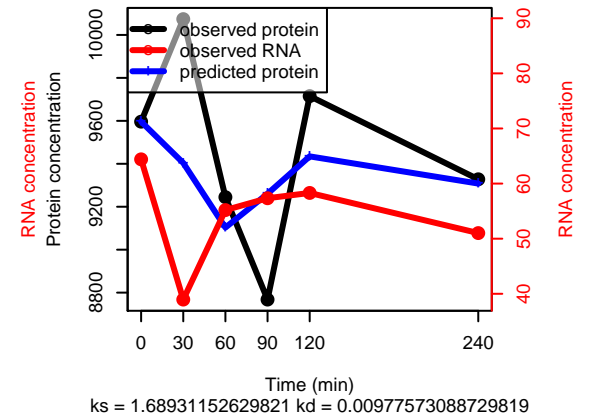

YLR419W

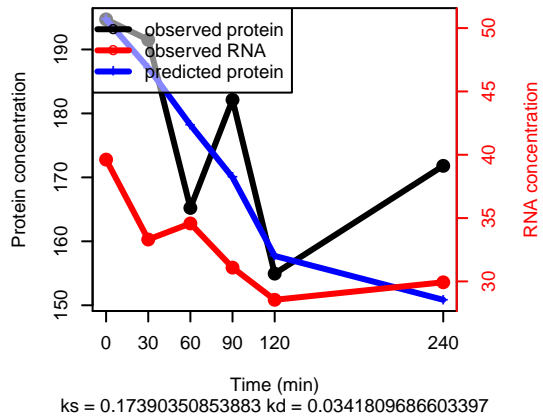

RPS1A

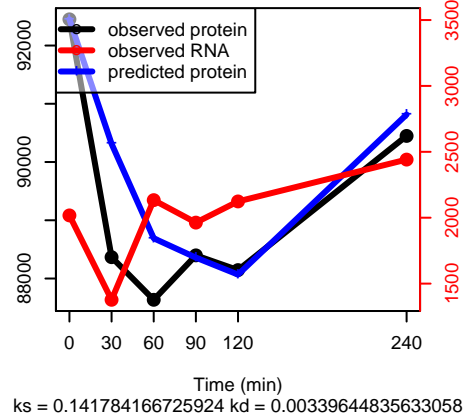

PHO84

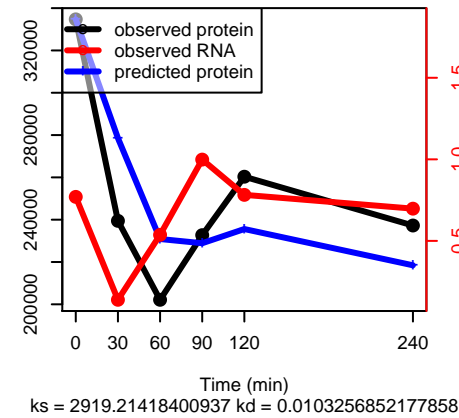

TIF11

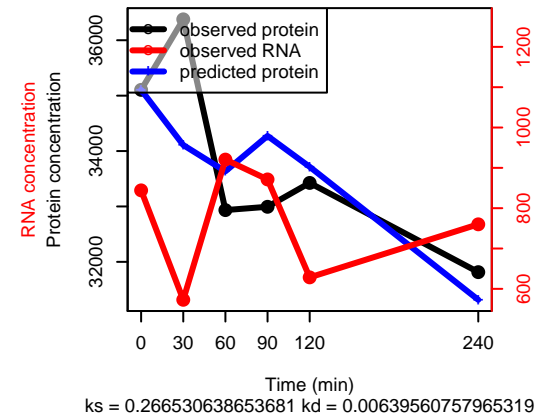

RPL42A

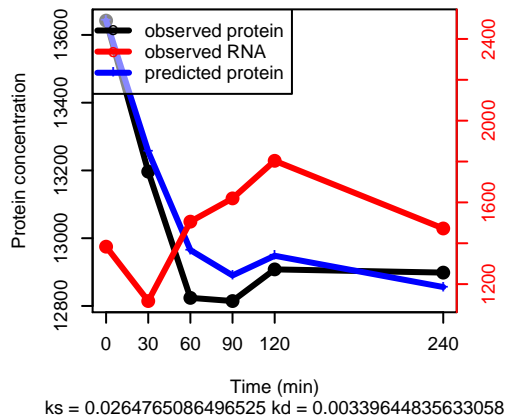

NOB1

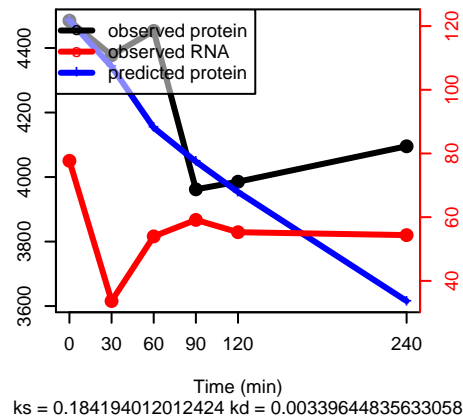

RPL3

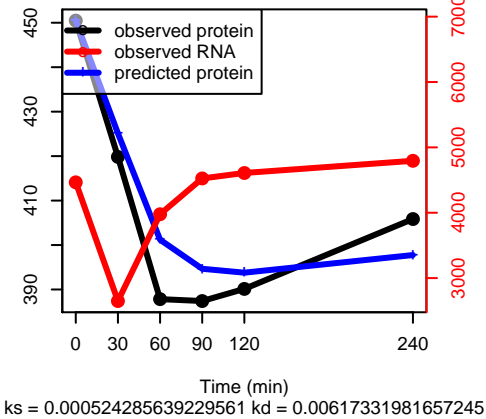

RFC1

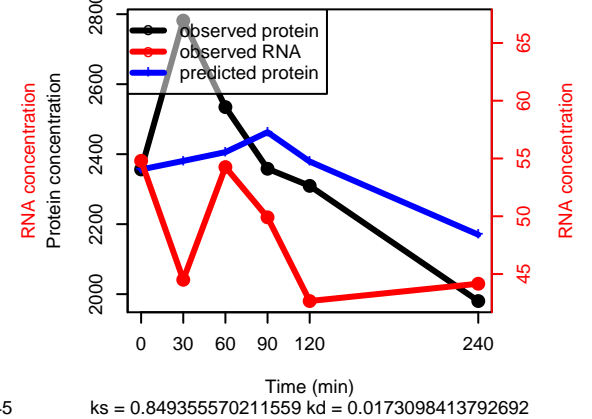

HRR25

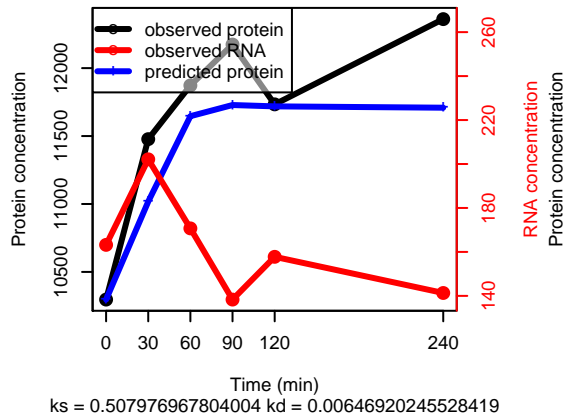

RPL1A

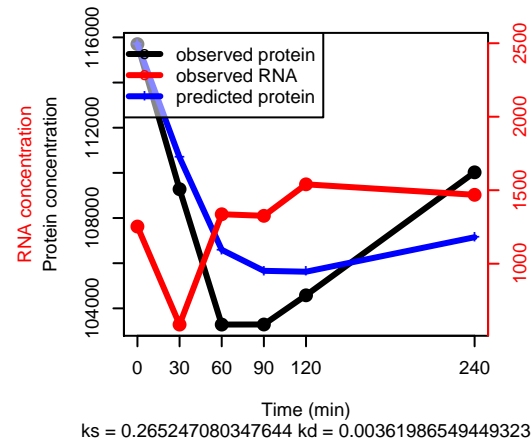

RVB2

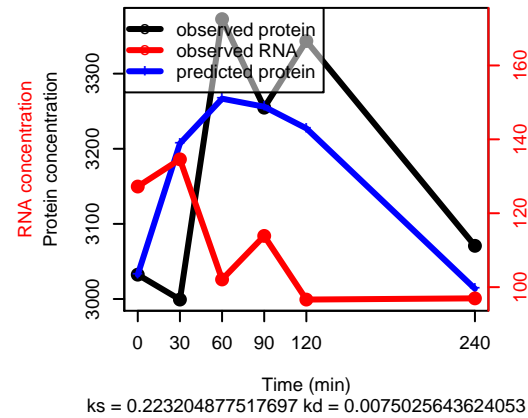

YBL036C

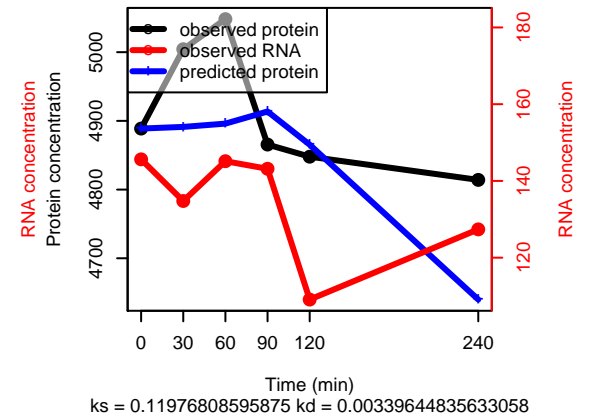

SHM1

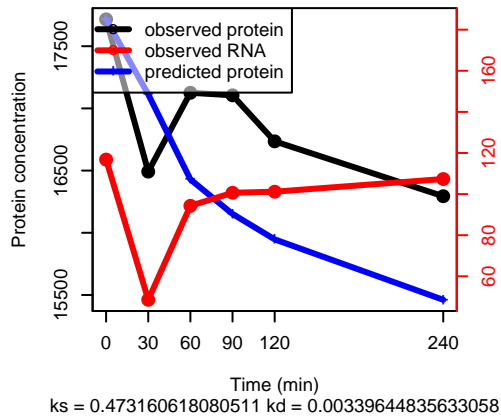

MZM1

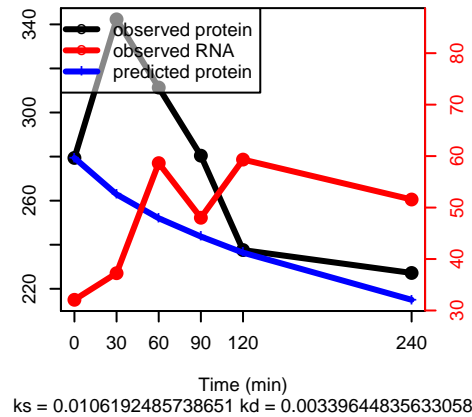

ARB1

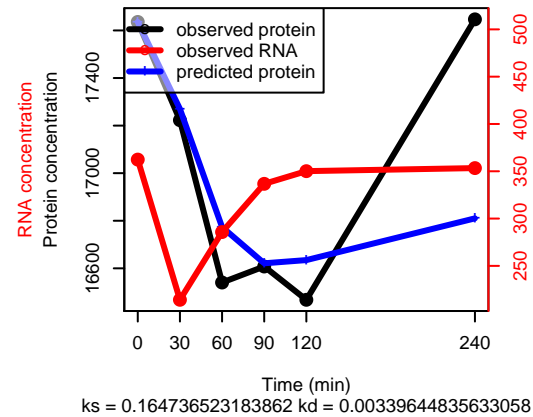

LCP5

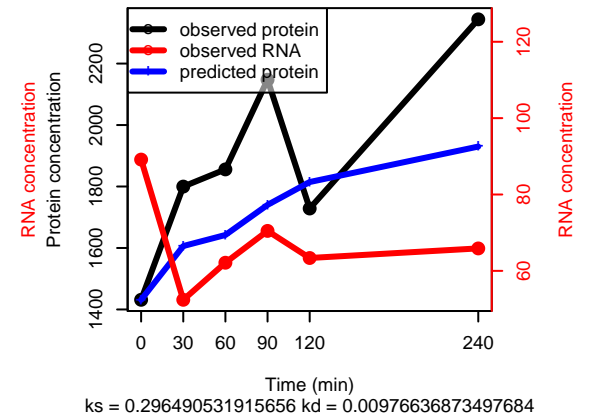

PUF4

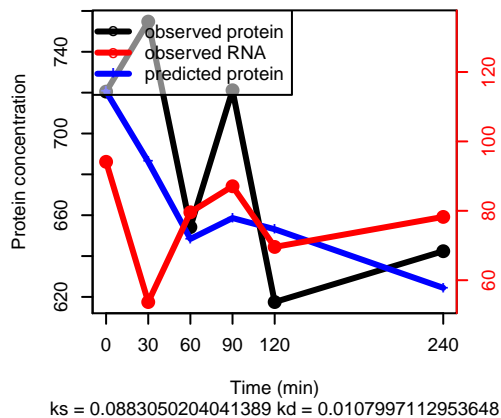

CKB1

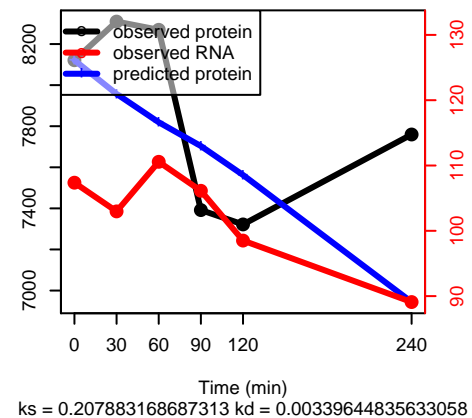

RPL30

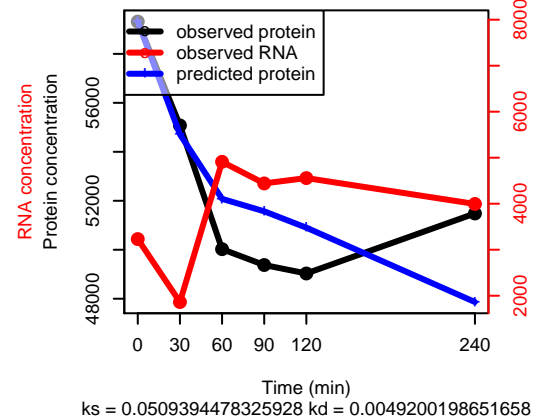

NUP145

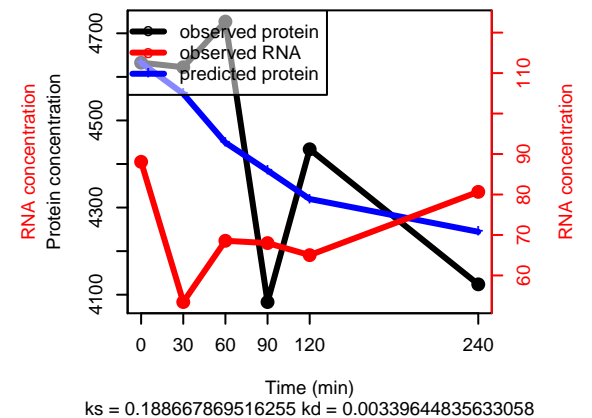



INO80

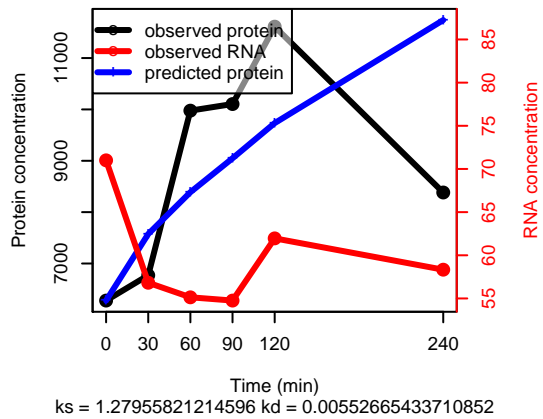

TAN1

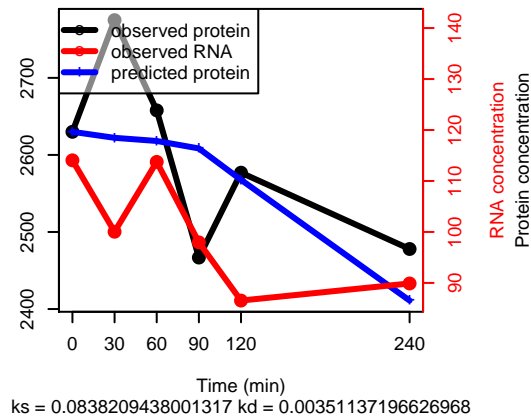

YGR017W

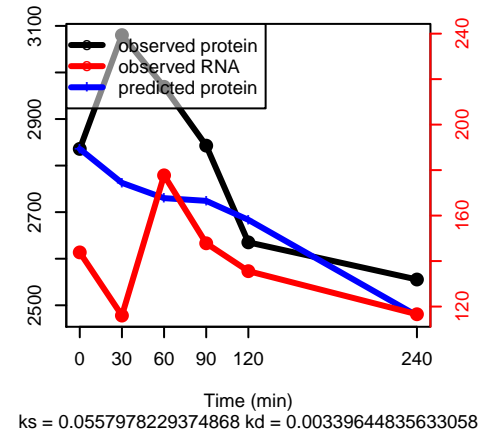

GGA2

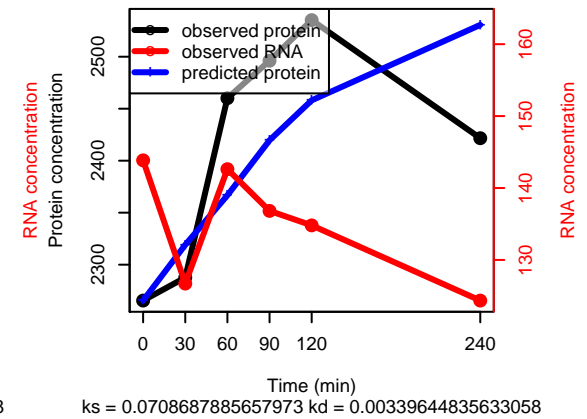

RPC10

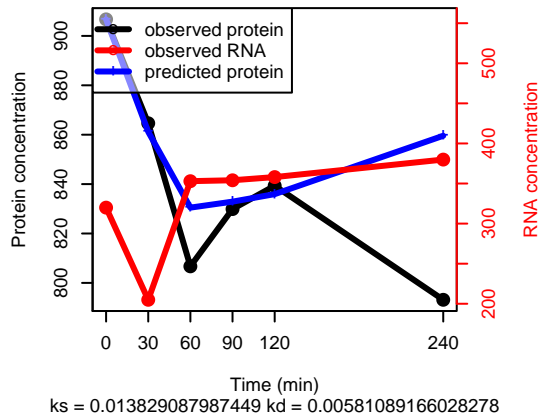

SCH9

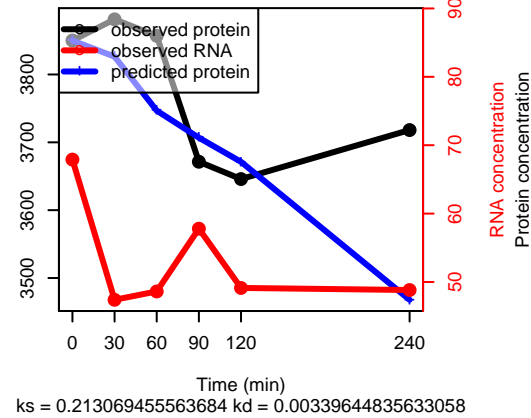

IMD2

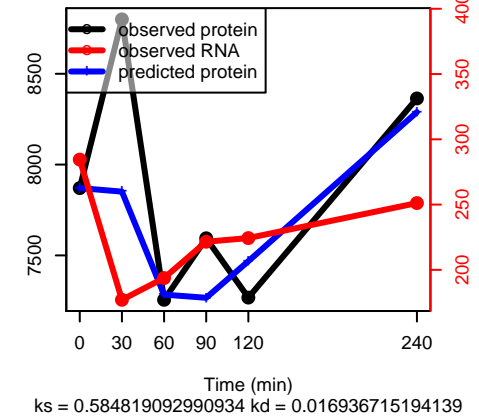

AGE2

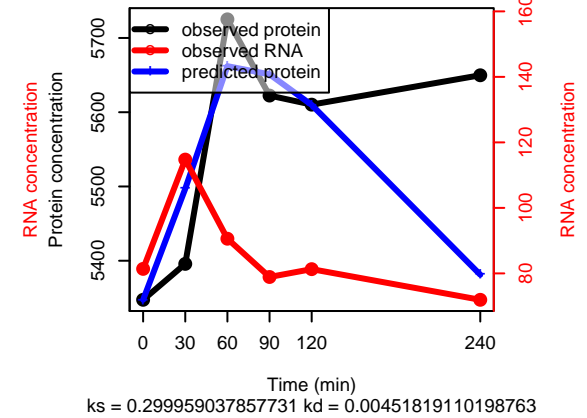

RPL16A

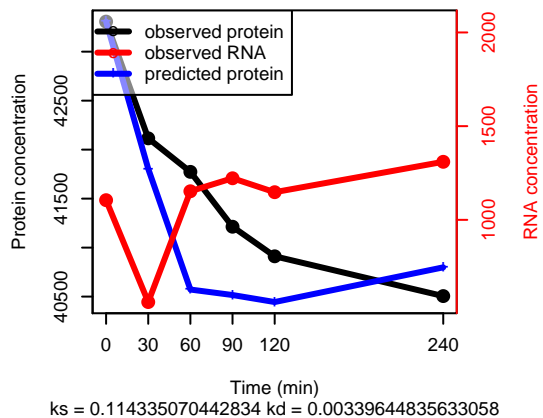

MTC1

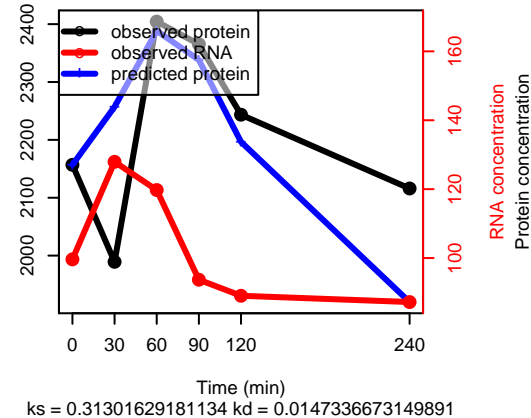

RPS21B

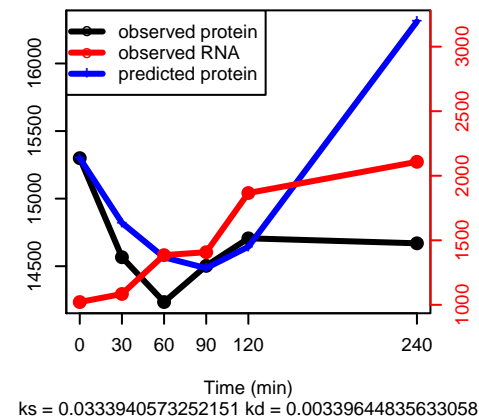

ACO2

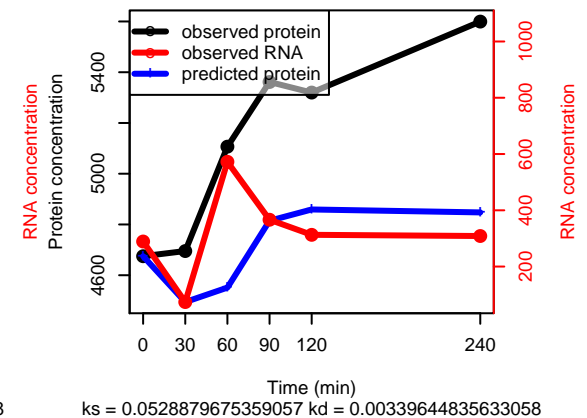

NPA3

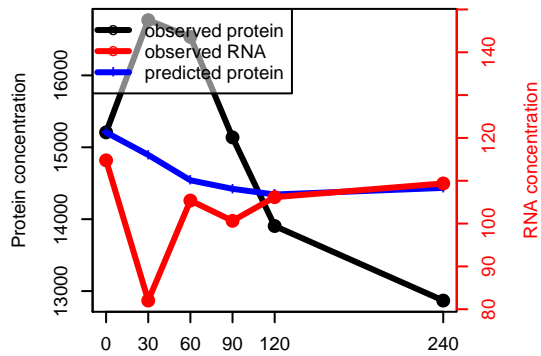

Time (min)  
ks = 0.736714029952805 kd = 0.00549876404677701

RPS4A

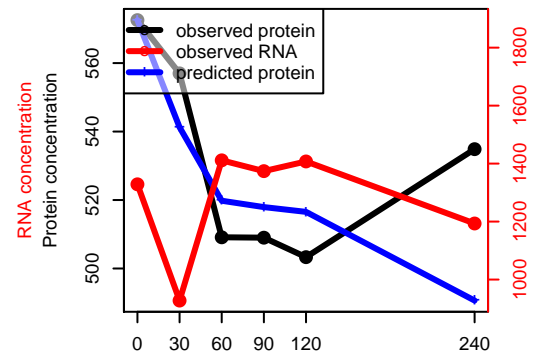

Time (min)  
ks = 0.00267153867342574 kd = 0.00726777348645991

RPC25

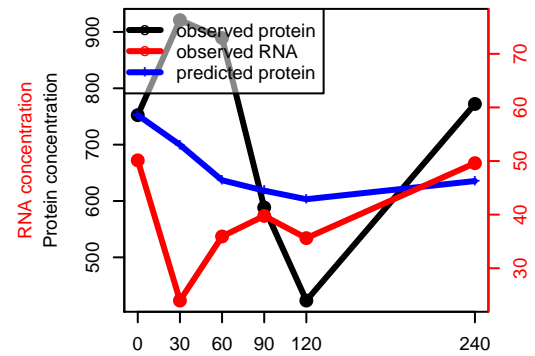

Time (min)  
ks = 0.144072359713513 kd = 0.00967883162705566

RPC37

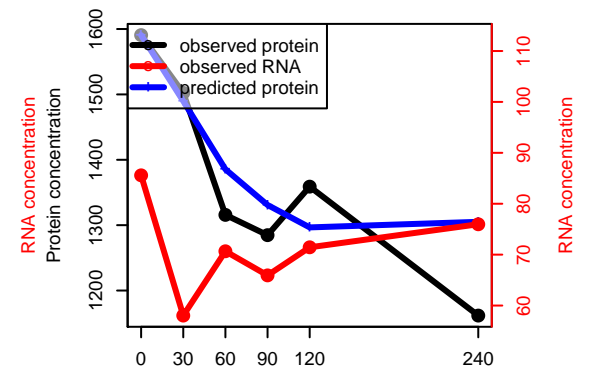

Time (min)  
ks = 0.212698104336229 kd = 0.0120196505673809

BUD20

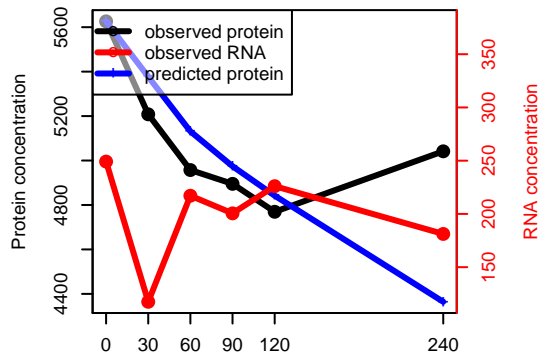

Time (min)  
ks = 0.0571855735889481 kd = 0.00339644835633058

DPH5

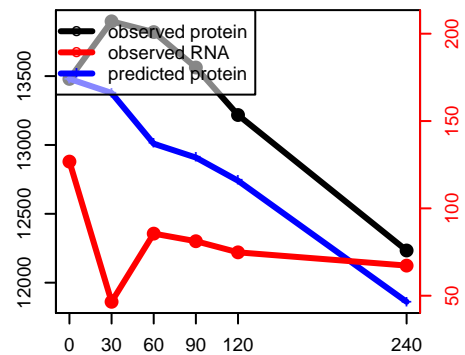

Time (min)  
ks = 0.489483160351707 kd = 0.00339644835633058

HCR1

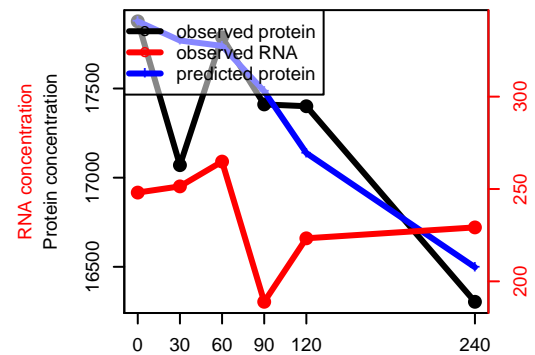

Time (min)  
ks = 0.227917573635744 kd = 0.00339644835633058

MAP1

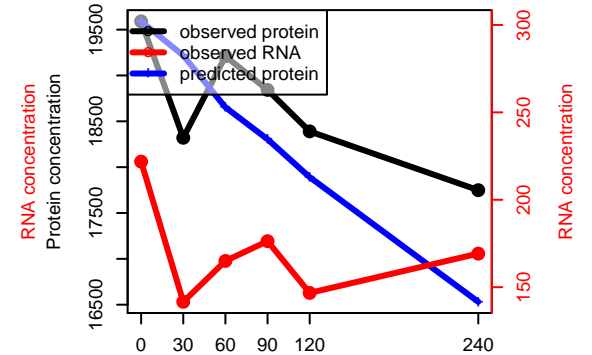

Time (min)  
ks = 0.29596496925524 kd = 0.00339644835633058

GCD7

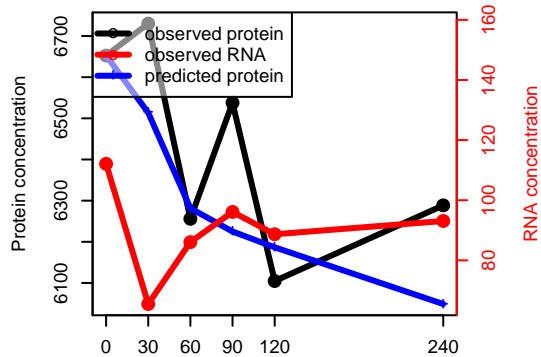

Time (min)  
ks = 0.339667202885069 kd = 0.00526468312430243

RPS25B

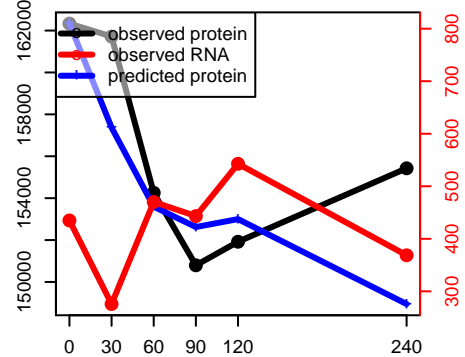

Time (min)  
ks = 1.06953069565712 kd = 0.00339644835633058

ILV5

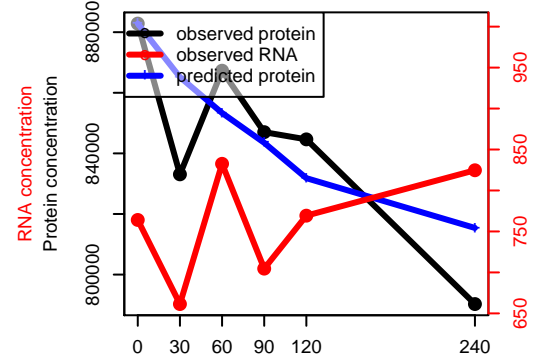

Time (min)  
ks = 3.34272672267293 kd = 0.00339644835633058

ECM16

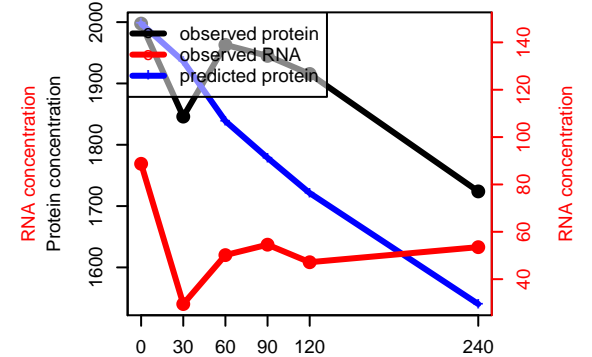

Time (min)  
ks = 0.0787533642371391 kd = 0.00339644835633058

HSC82

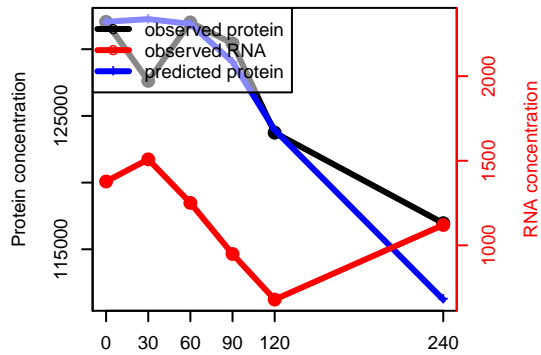

Time (min)  
ks = 0.315468303039731 kd = 0.00339644835633058

ERG8

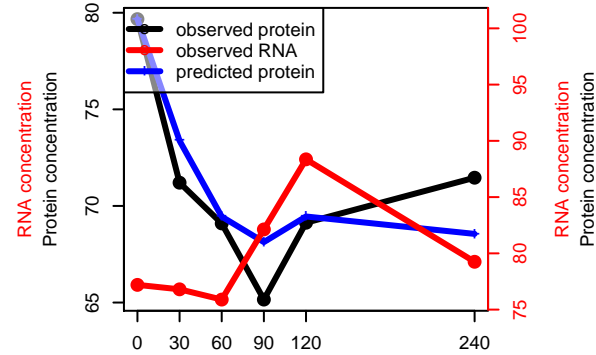

Time (min)  
ks = 0.0148038004996914 kd = 0.017681920533109

HHF2

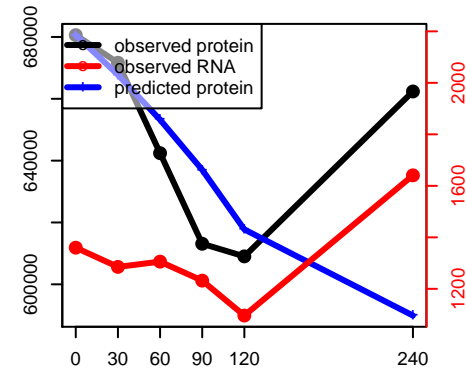

Time (min)  
ks = 1.40613159260774 kd = 0.00339644835633058

RPS7B

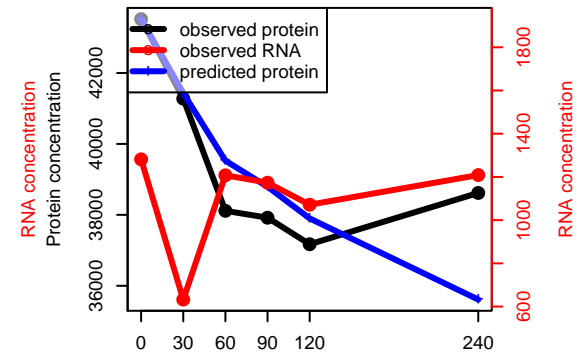

Time (min)  
ks = 0.12734238205573 kd = 0.0044949244524616

CAF20

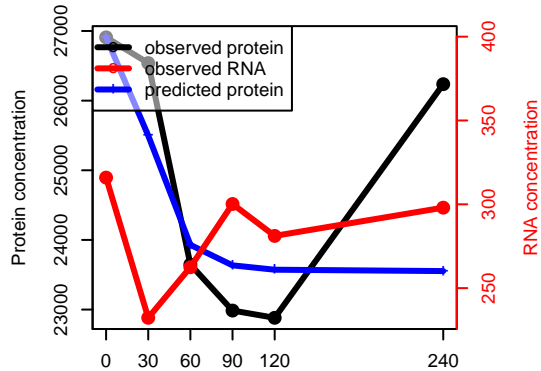

Time (min)  
ks = 0.99439513621525 kd = 0.0121289428263765

EGD1

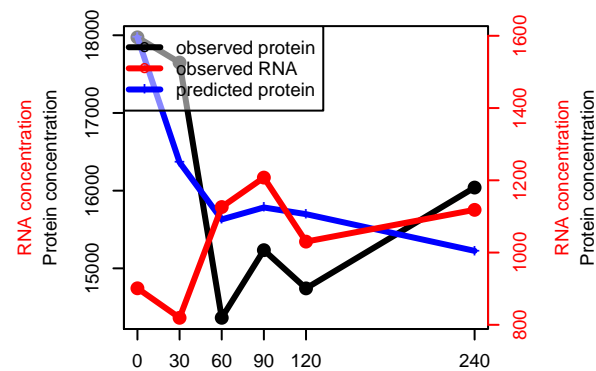

Time (min)  
ks = 0.141938597178778 kd = 0.0102421820425558

ELP3

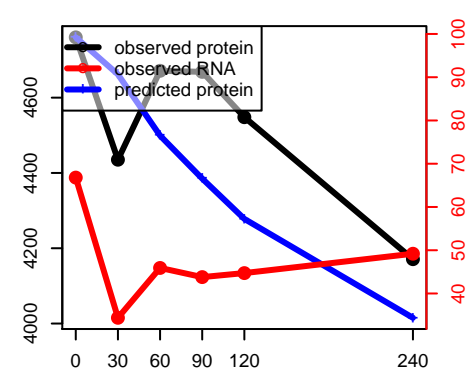

Time (min)  
ks = 0.251761212697266 kd = 0.00339644835633058

RPS6A

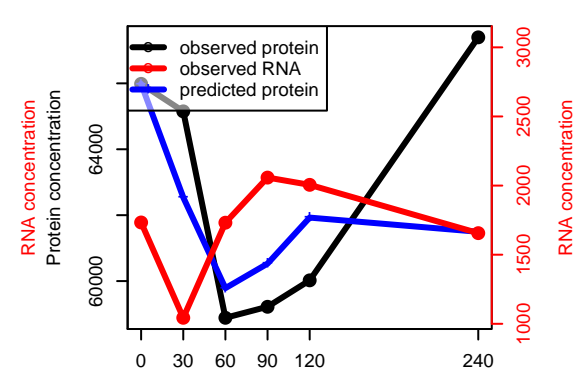

Time (min)  
ks = 0.216654457874503 kd = 0.00644523837241171

RTT10

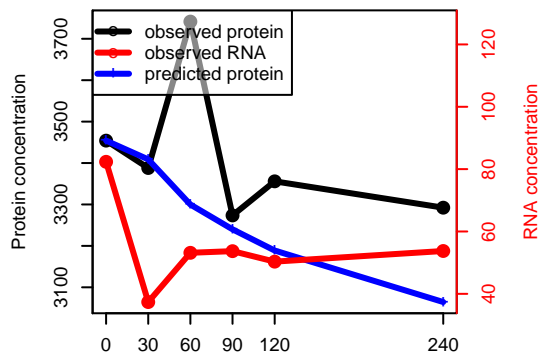

Time (min)  
ks = 0.170068650540806 kd = 0.00339644835633058

SHE3

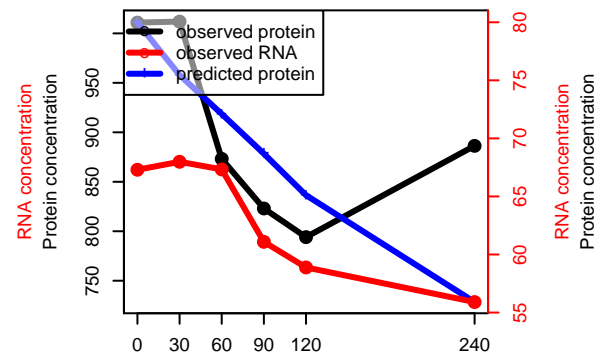

Time (min)  
ks = 0.114456277351462 kd = 0.00966574267903495

RPS9B

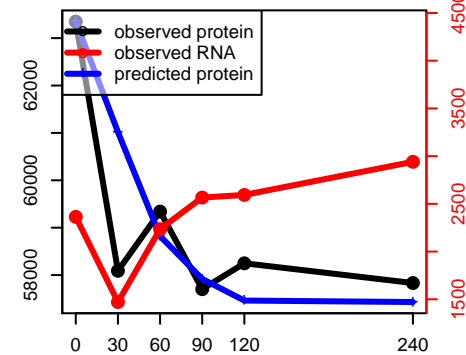

Time (min)  
ks = 0.0701439478712575 kd = 0.00339644835633058

YCR016W

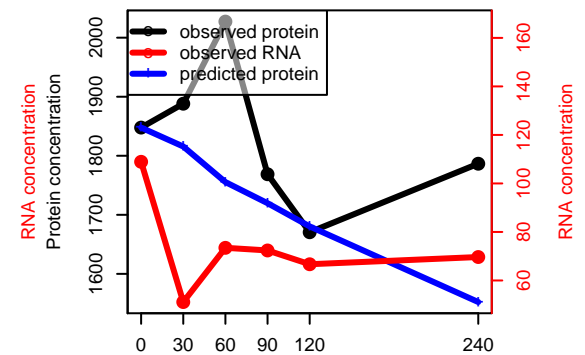

Time (min)  
ks = 0.0645697365217518 kd = 0.00339644835633058

PAA1

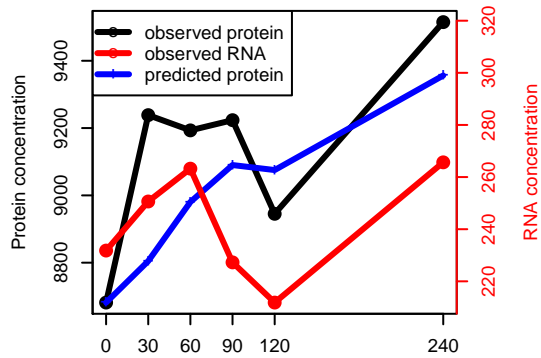

AKR1

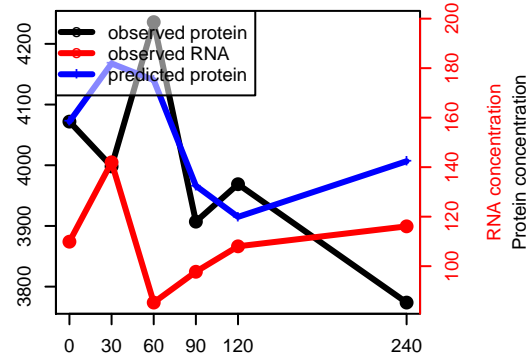

MCM3

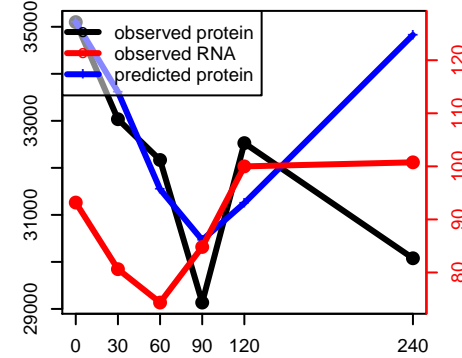

TMA20

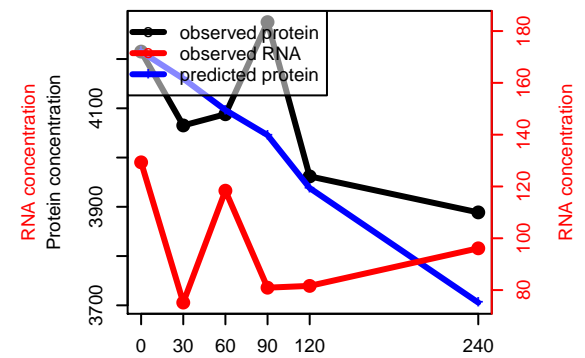

XRN1

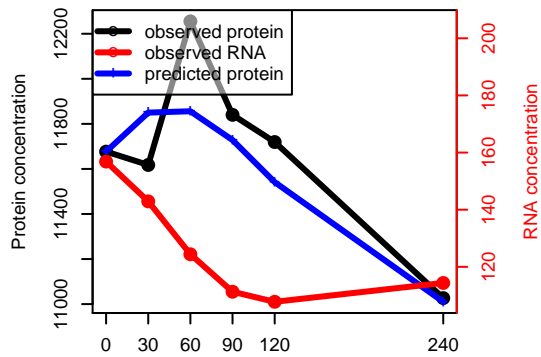

THG1

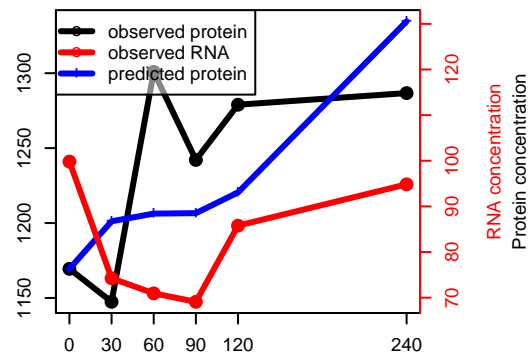

PPT1

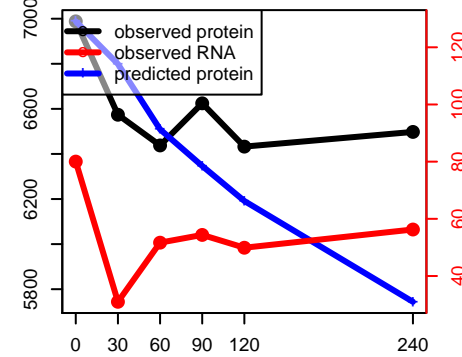

TFG1

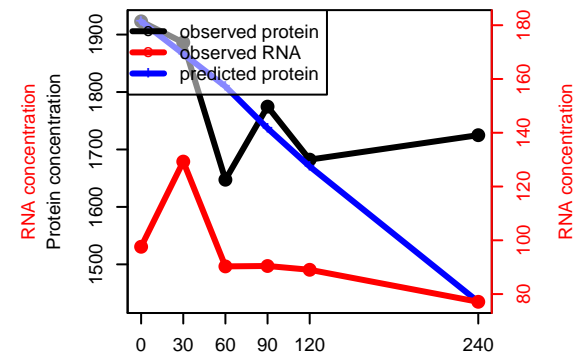

SER2

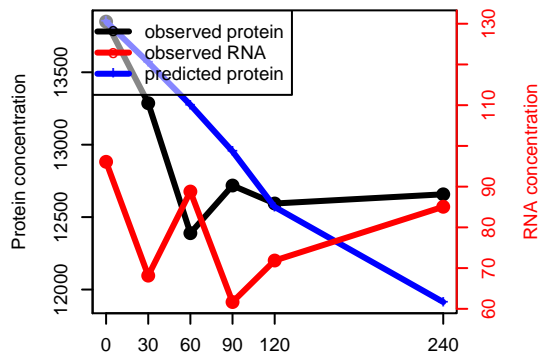

DYS1

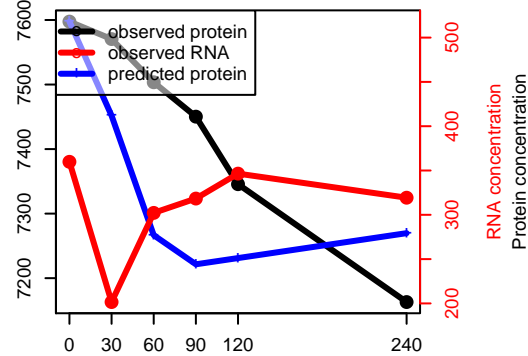

STE12

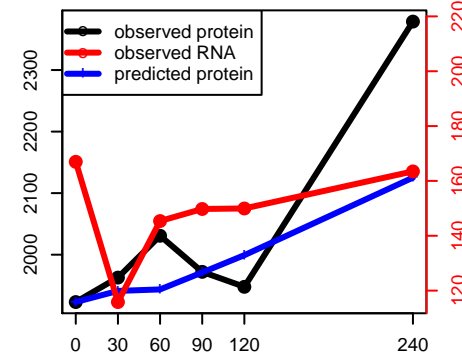

RIX1

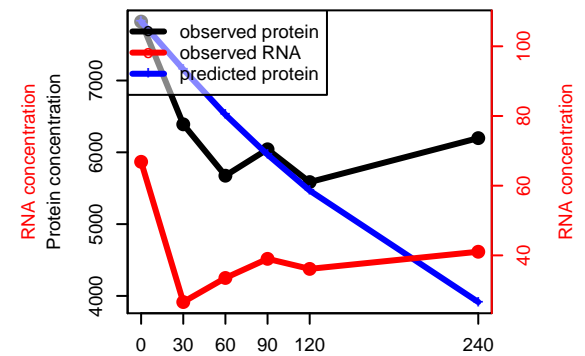

DJP1

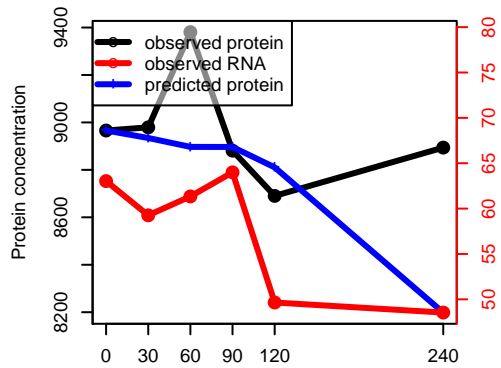

NSP1

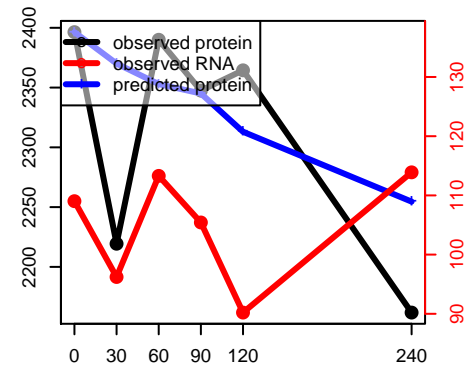

NUP82

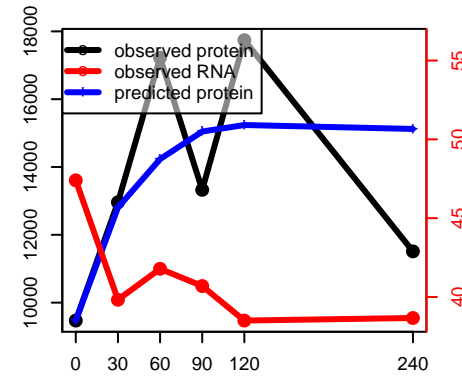

NET1

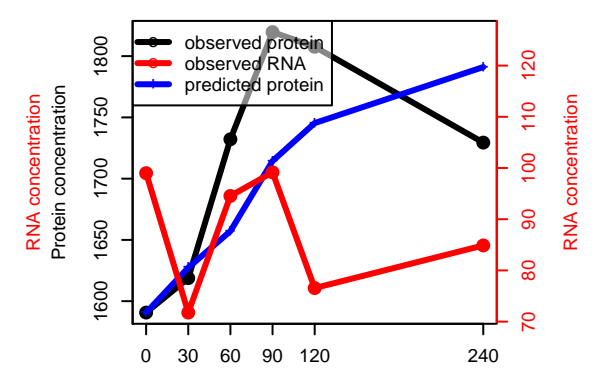

SIS2

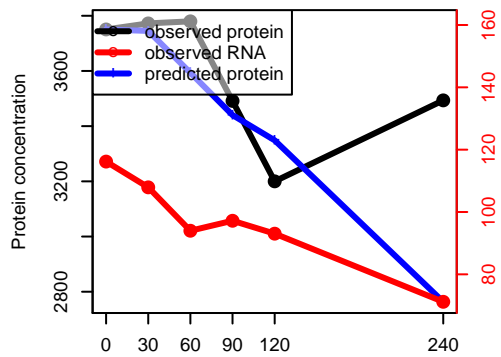

SPA2

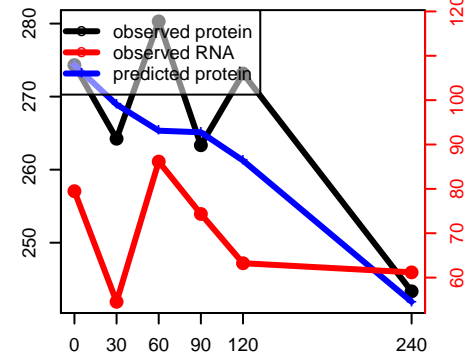

SDO1

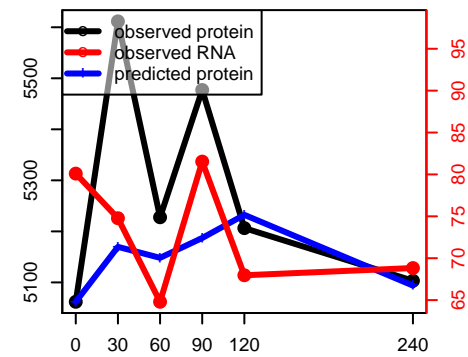

YLR126C

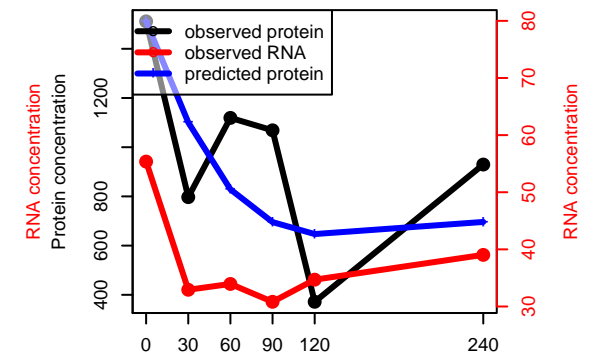

ARC18

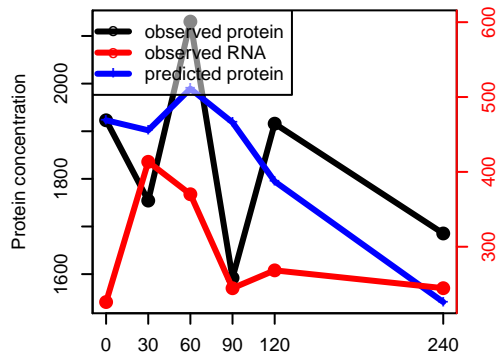

RPS17A

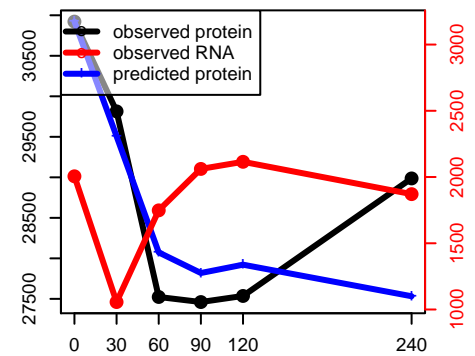

MRPL3

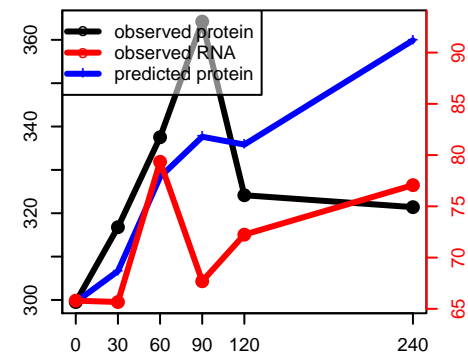

FOL1

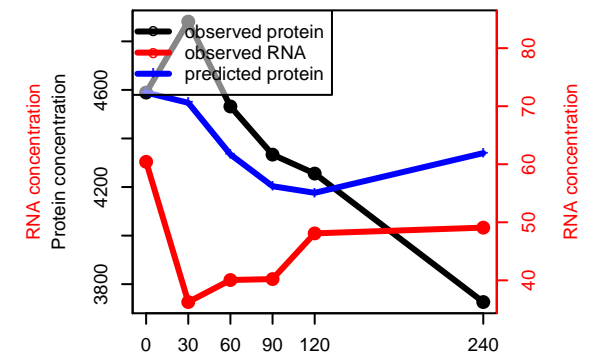

DBP6

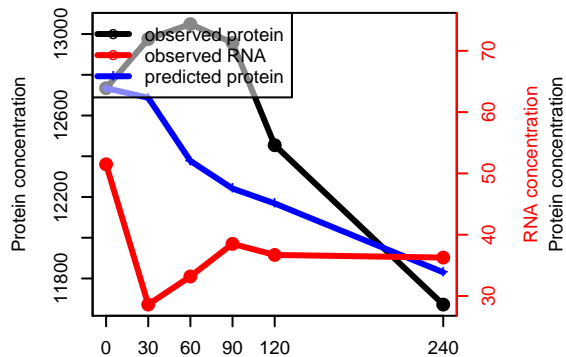

Time (min)  
ks = 1.04106688830747 kd = 0.00339644835633058

UTP23

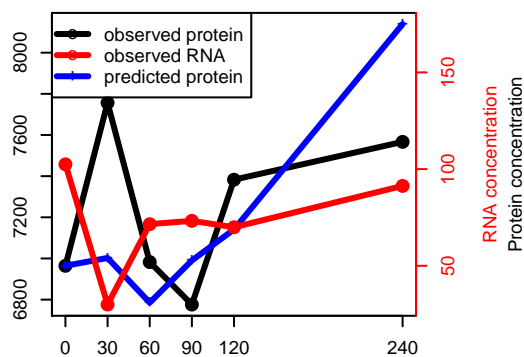

Time (min)  
ks = 0.66774568244975 kd = 0.00604007316236449

OST3

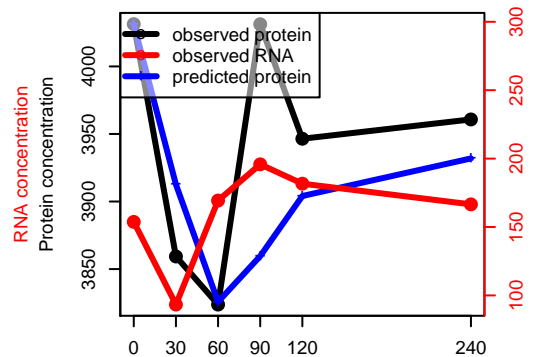

Time (min)  
ks = 0.0777486277308531 kd = 0.00339644835633058

RPL7B

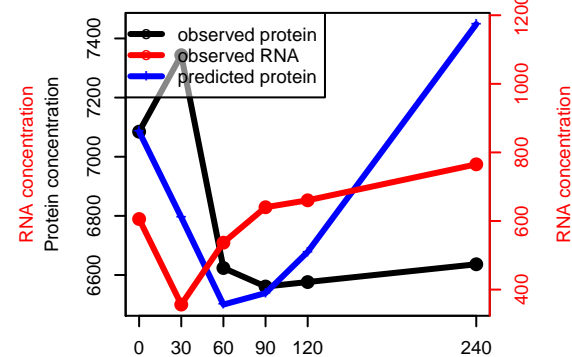

Time (min)  
ks = 0.0712815814376313 kd = 0.00630540216646008

YLH47

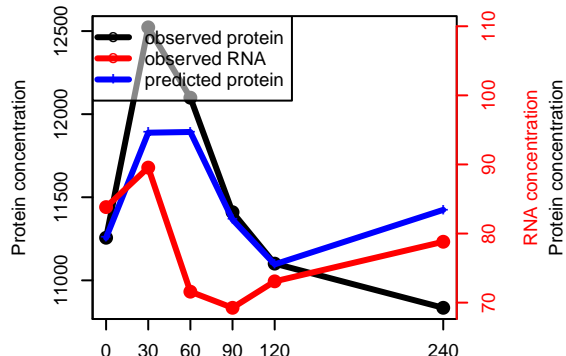

Time (min)  
ks = 2.31386799146753 kd = 0.0155263666304644

DPM1

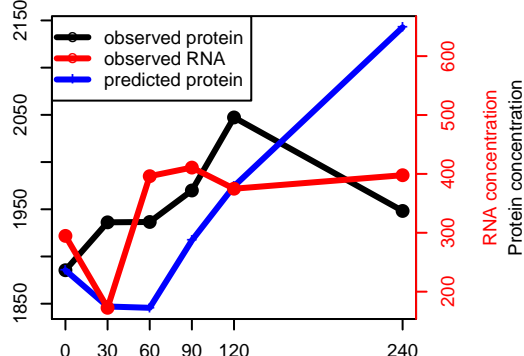

Time (min)  
ks = 0.0217445613467431 kd = 0.00339644835633058

REB1

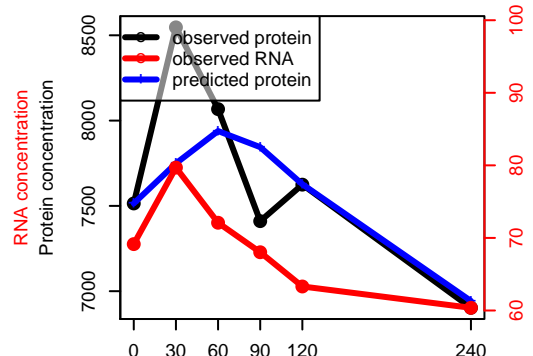

Time (min)  
ks = 1.50719776461524 kd = 0.0137214015463373

NHP6B

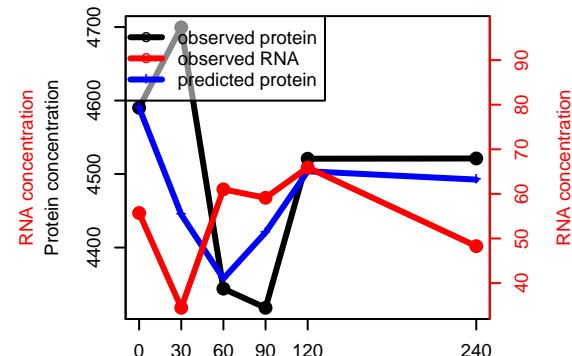

Time (min)  
ks = 0.412166668588133 kd = 0.00517239085443466

CYC8

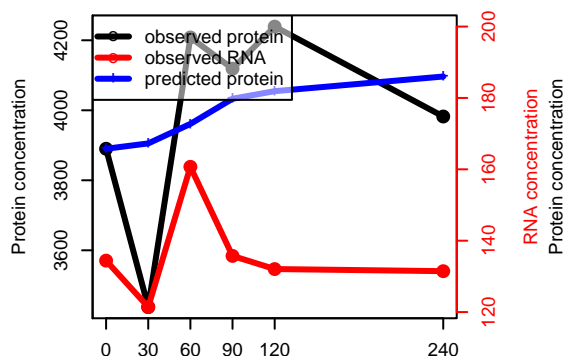

Time (min)  
ks = 0.107572830987473 kd = 0.00339644835633058

THR4

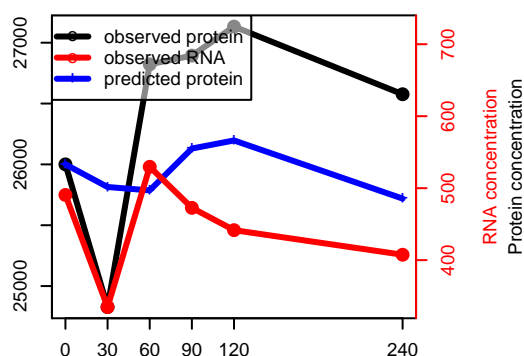

Time (min)  
ks = 0.199408196081969 kd = 0.00339644835633058

MSS116

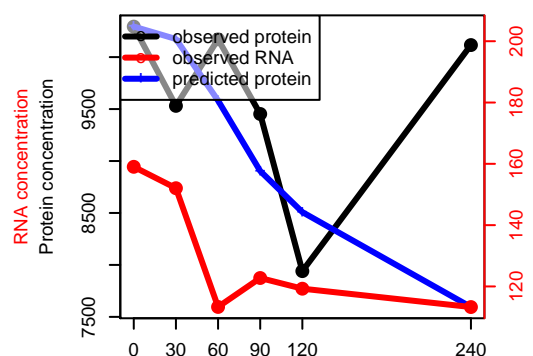

Time (min)  
ks = 0.863483495607687 kd = 0.0135075167547407

SRP101

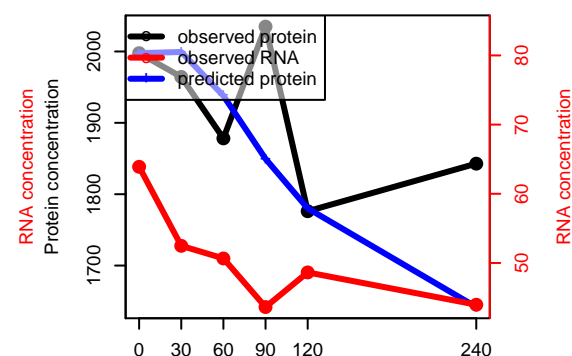

Time (min)  
ks = 0.376859839022996 kd = 0.0108948826968751



GUK1

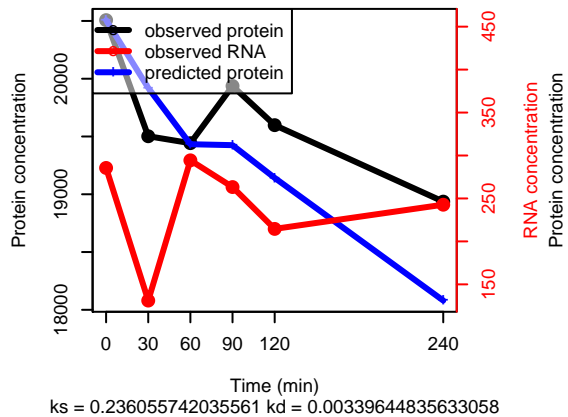

UTP7

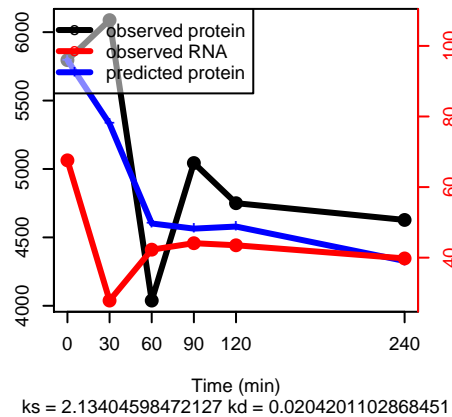

ILV1

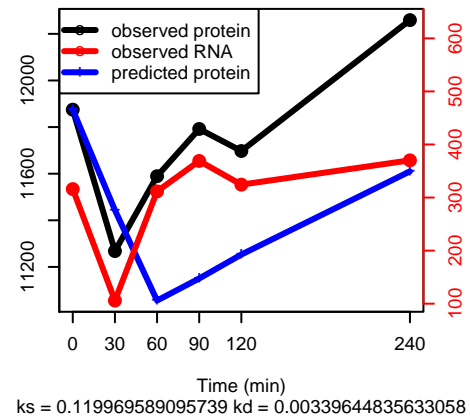

BEM2

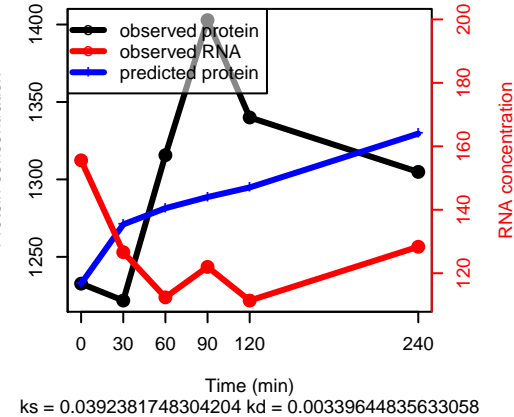

YER156C

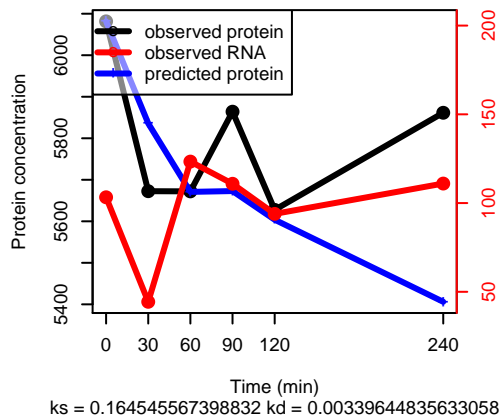

PRP43

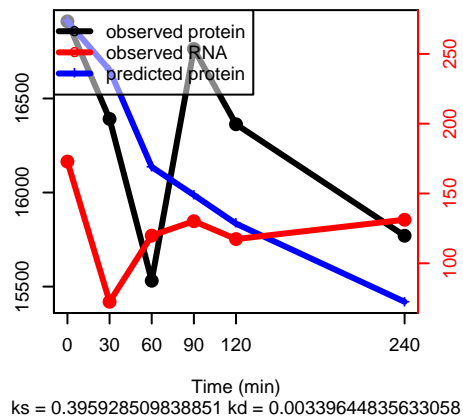

SPT6

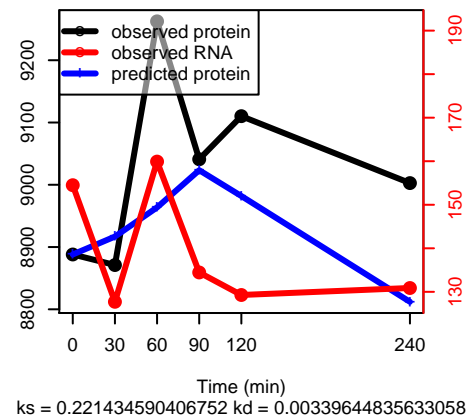

YCK1

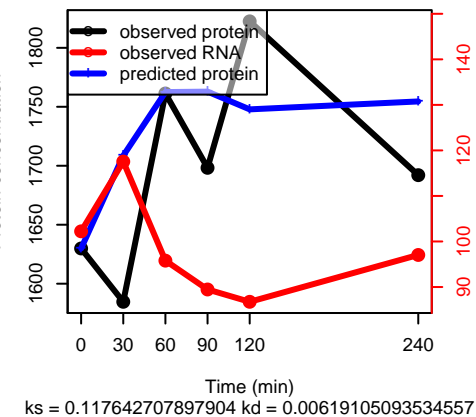

RPL34B

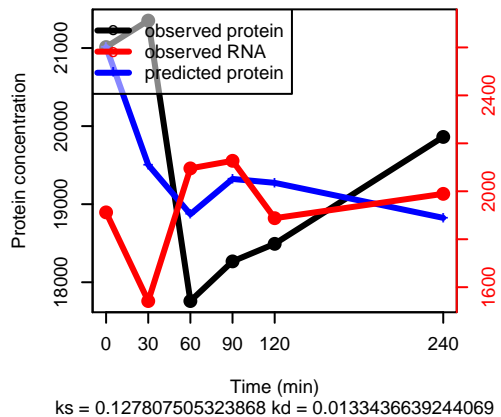

LYS12

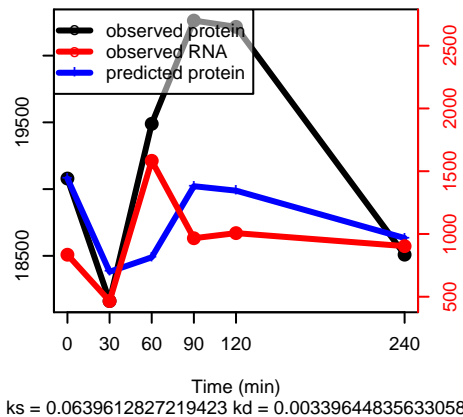

YVH1

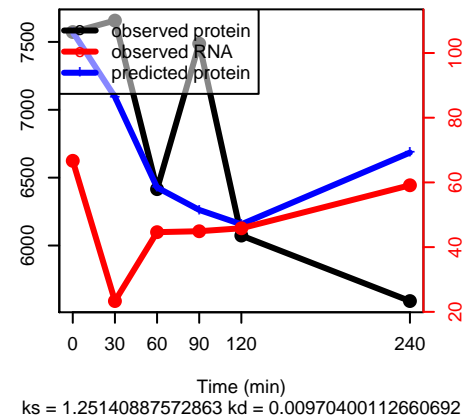

PMT4

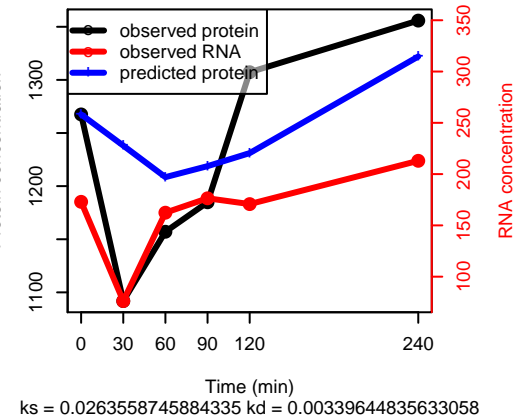

LAC1

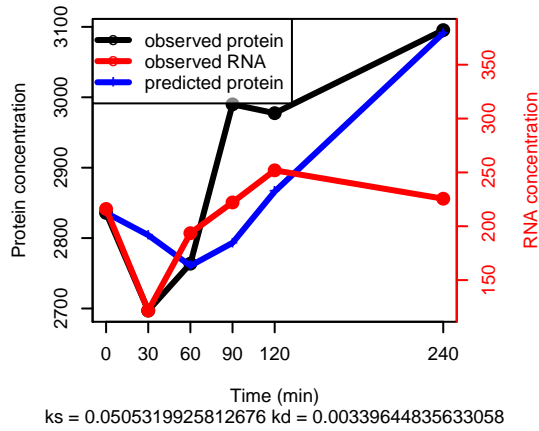

RPF2

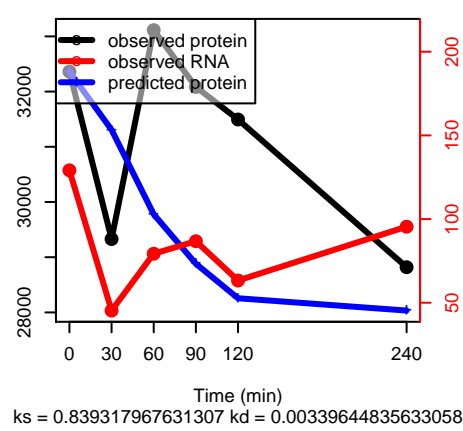

SRP40

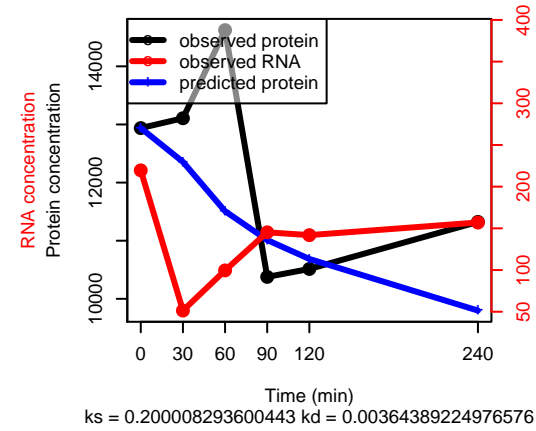

TCB2

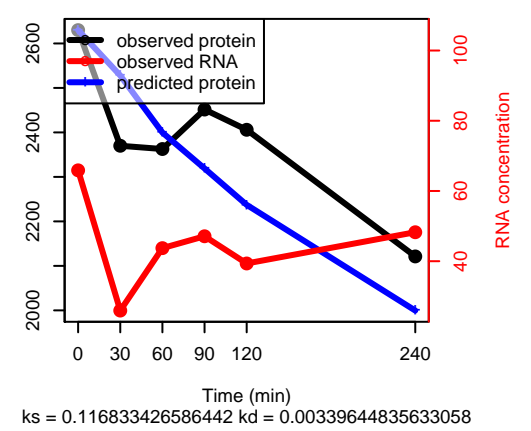

NMA111

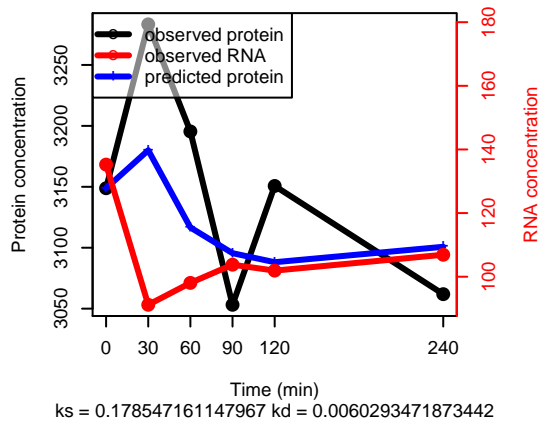

SPE2

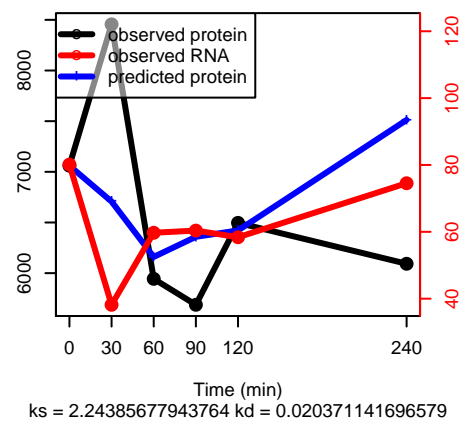

NUP1

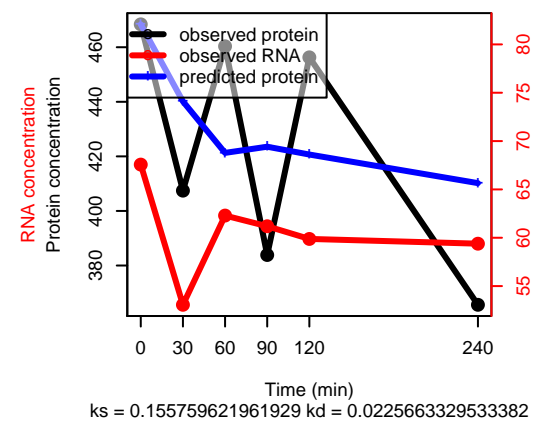

SYH1

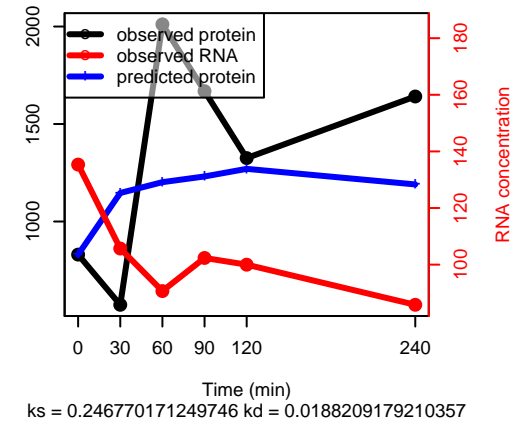

RRP9

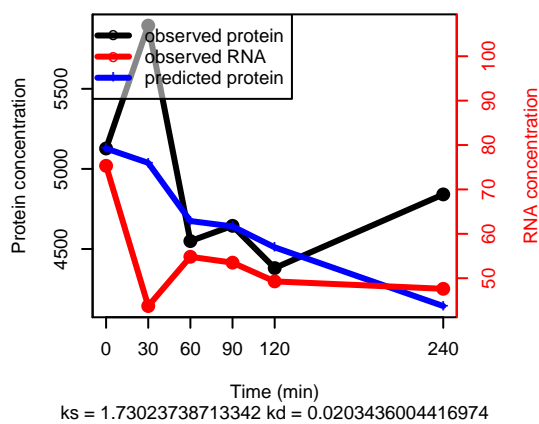

RRP15

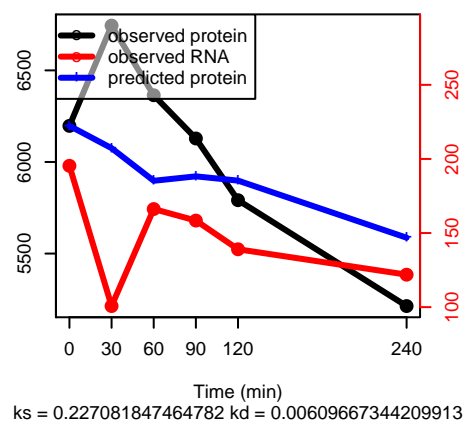

ECM1

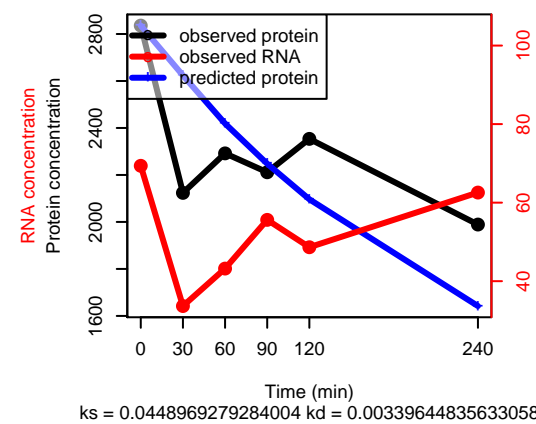

RPL19A

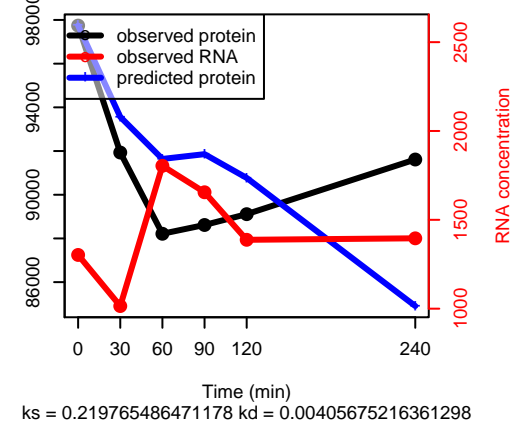

TSC10

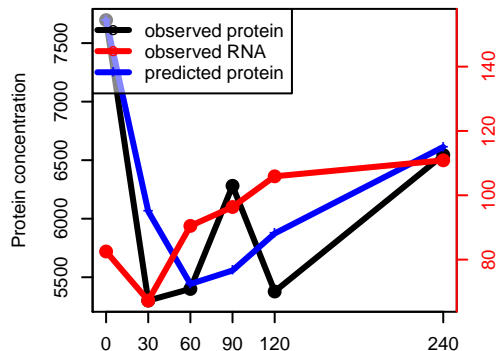

Time (min)  
ks = 1.41877334812953 kd = 0.0234872663591145

PAF1

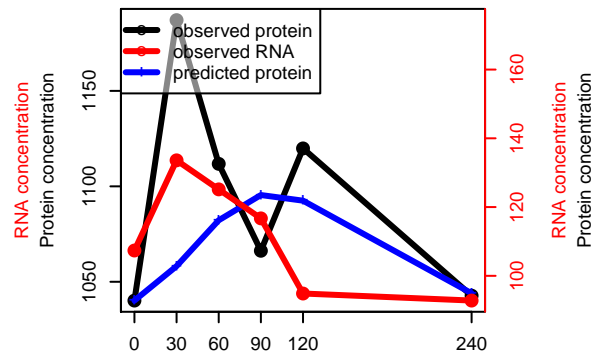

Time (min)  
ks = 0.0343225042967728 kd = 0.00339644835633058

APA1

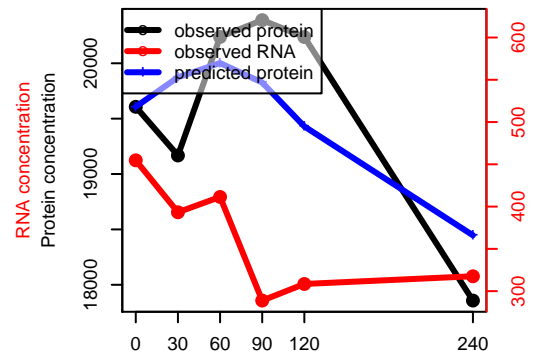

Time (min)  
ks = 0.179389022286024 kd = 0.00339644835633058

HEM3

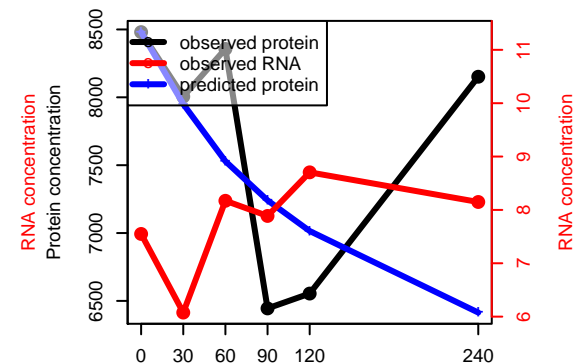

Time (min)  
ks = 3.1331005202836 kd = 0.00470949795921951

YGL101W

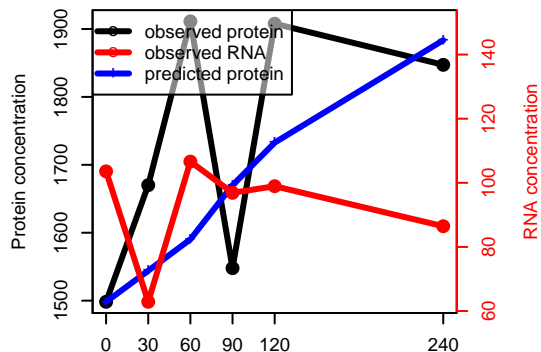

Time (min)  
ks = 0.0806117313093325 kd = 0.00339644835633058

ITC1

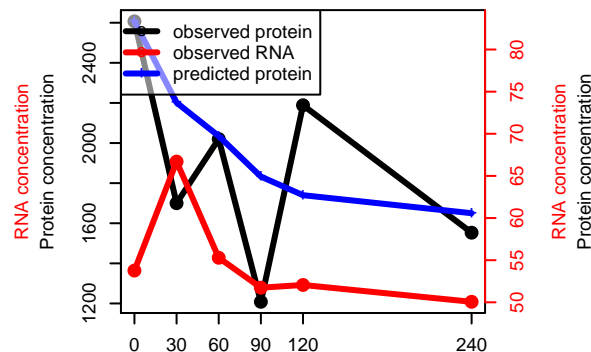

Time (min)  
ks = 1.21987238351509 kd = 0.0373825719708959

AML1

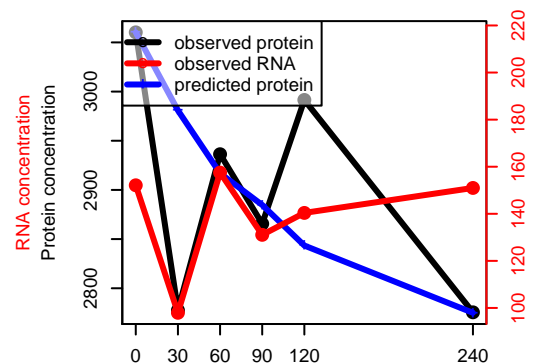

Time (min)  
ks = 0.0613091274461545 kd = 0.00339644835633058

PHO81

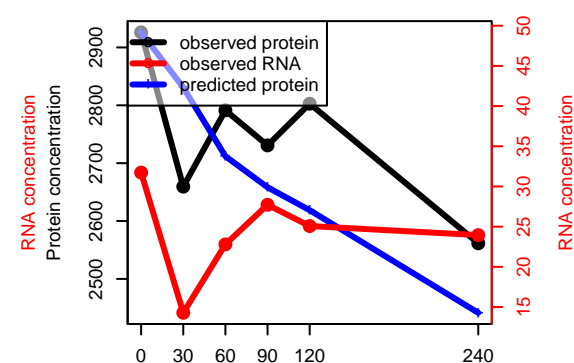

Time (min)  
ks = 0.290047912625075 kd = 0.00339644835633058

PAN6

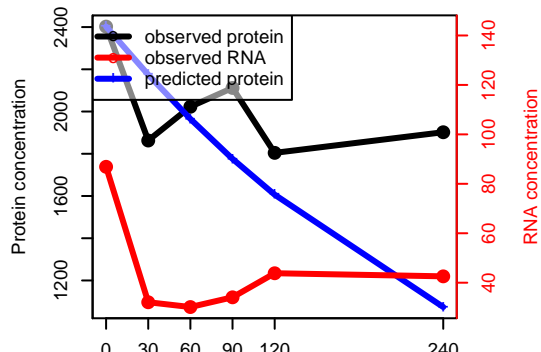

Time (min)  
ks = 0.00133089294723543 kd = 0.00339644835633058

HOC1

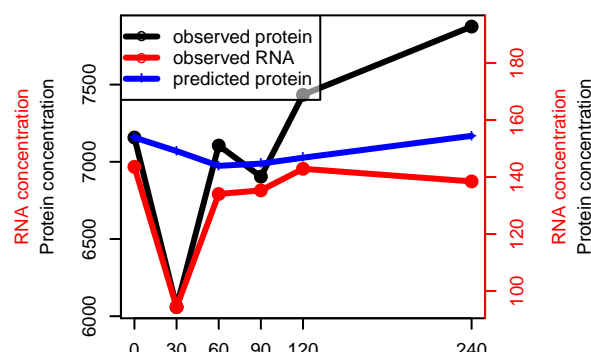

Time (min)  
ks = 0.179798533238853 kd = 0.00339644835633058

FBA1

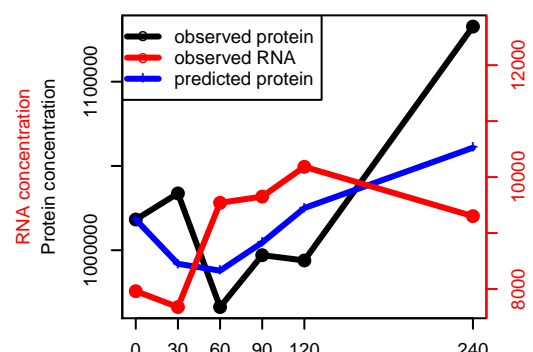

Time (min)  
ks = 0.776190136827666 kd = 0.00690953788165657

ACP1

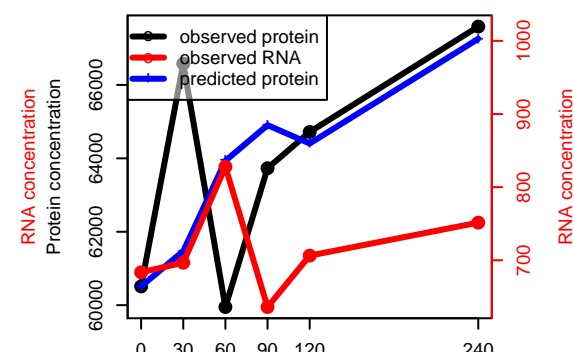

Time (min)  
ks = 0.859341353146807 kd = 0.00920024700822479

NOC3

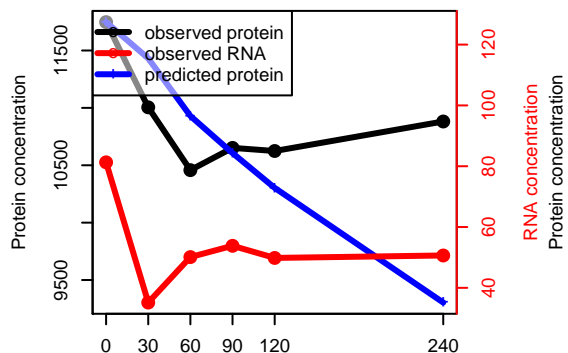

Time (min)  
ks = 0.496443091240776 kd = 0.00339644835633058

YLR413W

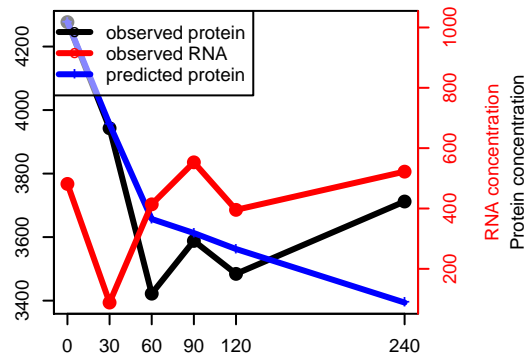

Time (min)  
ks = 0.0333631813722015 kd = 0.00485665299582439

SOK2

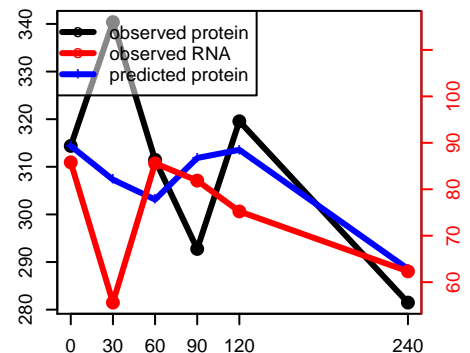

Time (min)  
ks = 0.0368091015869183 kd = 0.00906388673986774

YHM2

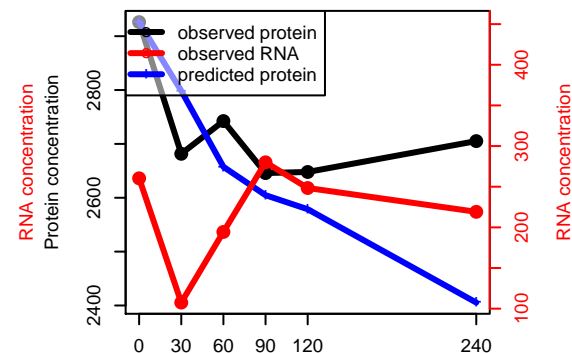

Time (min)  
ks = 0.0300715630923584 kd = 0.00339644835633058

ZRC1

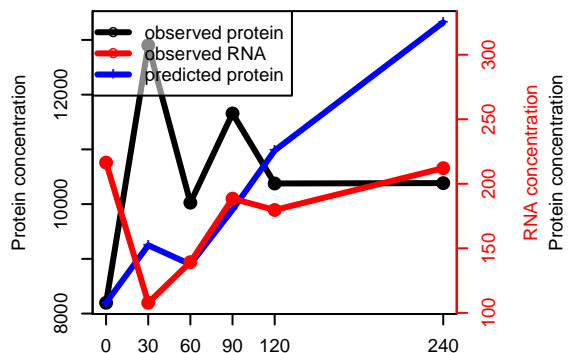

Time (min)  
ks = 1.27841933417928 kd = 0.0189150594496298

PSK2

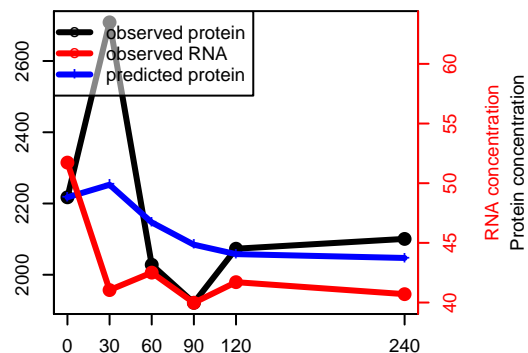

Time (min)  
ks = 1.7983191323804 kd = 0.0360092706930999

RPS30B

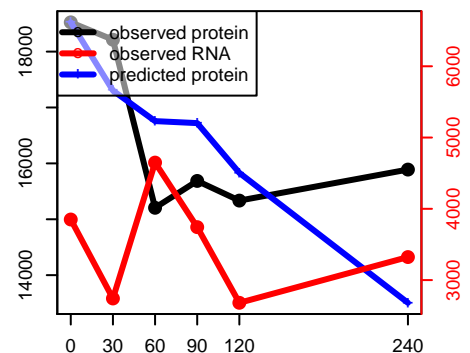

Time (min)  
ks = 0.0330620535894171 kd = 0.00831463615398951

WTM2

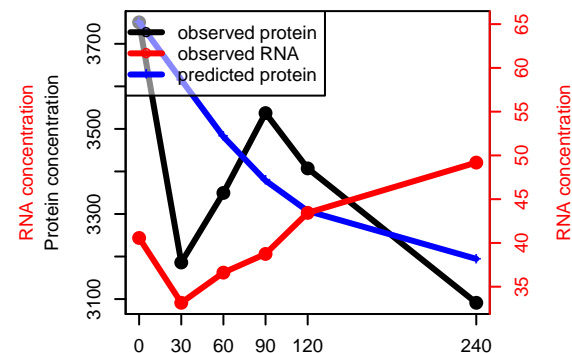

Time (min)  
ks = 0.217342320654398 kd = 0.00339644835633058

RPA43

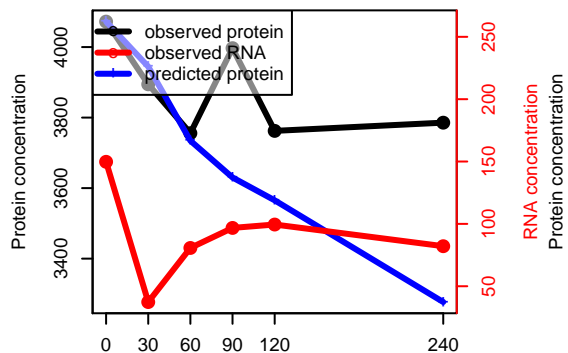

Time (min)  
ks = 0.101416770978888 kd = 0.00339644835633058

IDI1

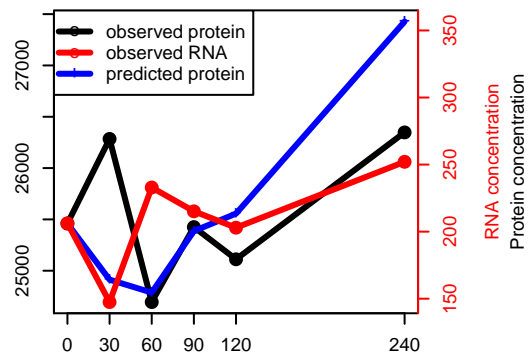

Time (min)  
ks = 0.781794690444169 kd = 0.00619739950706694

FUN30

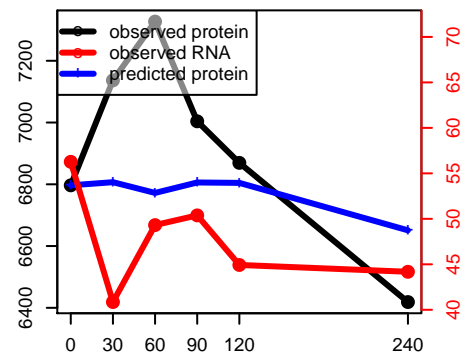

Time (min)  
ks = 0.484973336155993 kd = 0.00339644835633058

NAT1

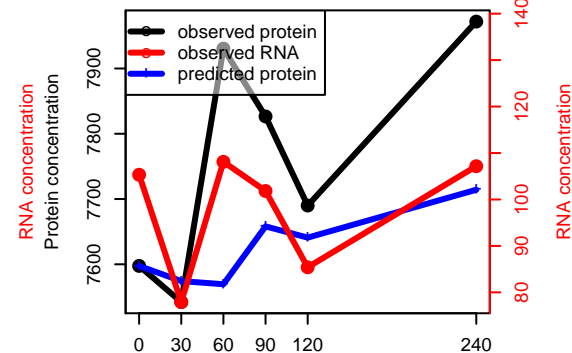

Time (min)  
ks = 0.273882601026671 kd = 0.00339644835633058

TSR1

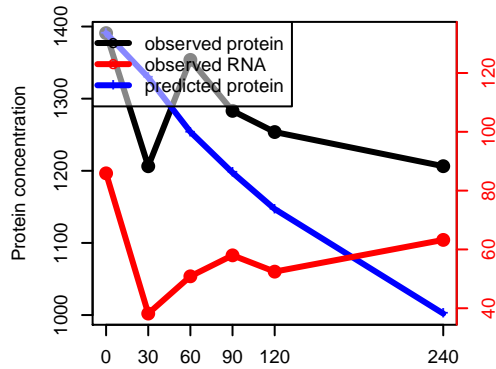

Time (min)  
ks = 0.0418705918789448 kd = 0.00339644835633058

RPS29B

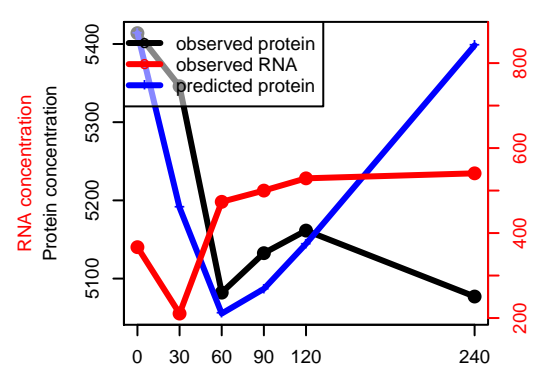

Time (min)  
ks = 0.0374702075985518 kd = 0.00339644835633058

RTN1

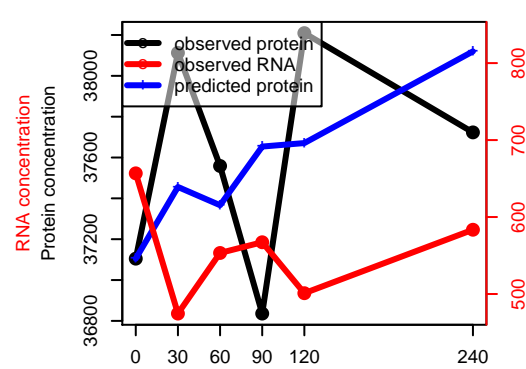

Time (min)  
ks = 0.28256112558056 kd = 0.00396967771196607

GDA1

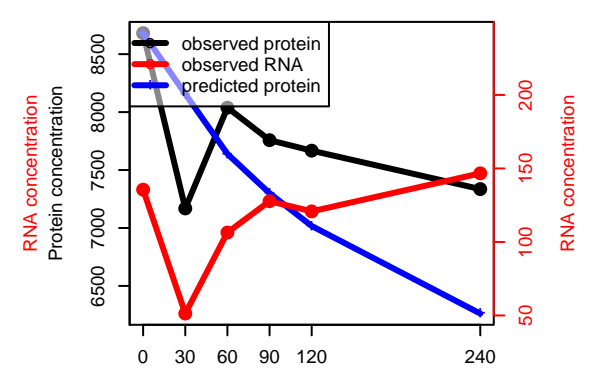

Time (min)  
ks = 0.120149671310599 kd = 0.00339644835633058

RPL12A

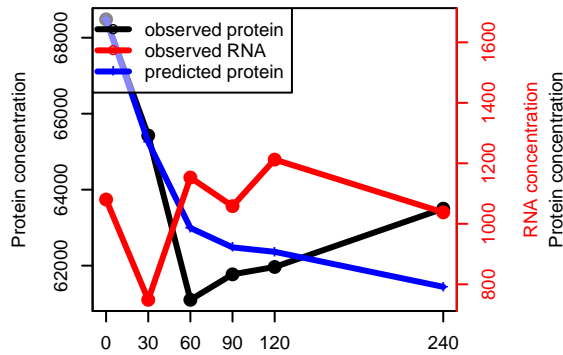

Time (min)  
ks = 0.336543249998063 kd = 0.00620089098042748

BOI2

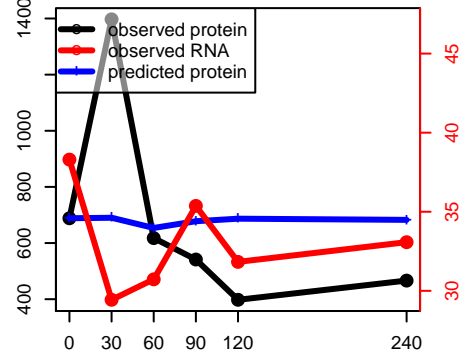

Time (min)  
ks = 0.625371926964221 kd = 0.0300560335617234

MCM6

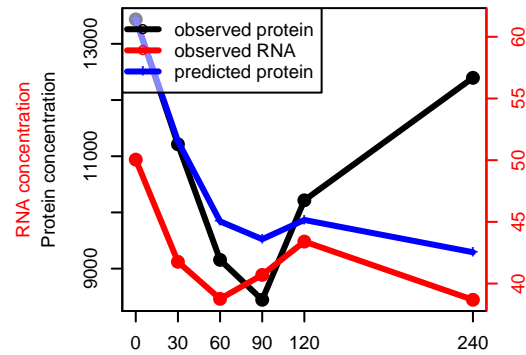

Time (min)  
ks = 11.4788604484015 kd = 0.048609122849282

TOM20

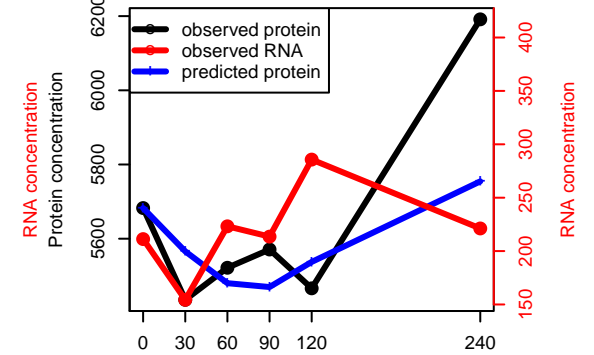

Time (min)  
ks = 0.0835334226938415 kd = 0.00339644835633058

PAN5

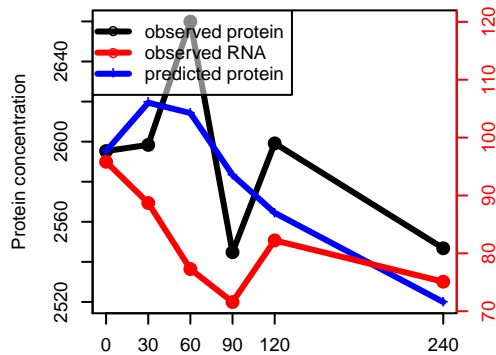

Time (min)  
ks = 0.104821495910631 kd = 0.00339644835633058

TOM71

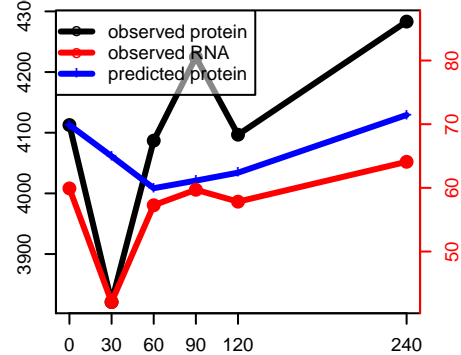

Time (min)  
ks = 0.239738211031969 kd = 0.00339644835633058

RPS24B

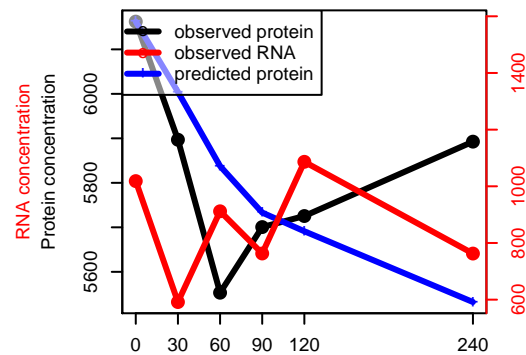

Time (min)  
ks = 0.0197787265467087 kd = 0.0034613902360172

RPA34

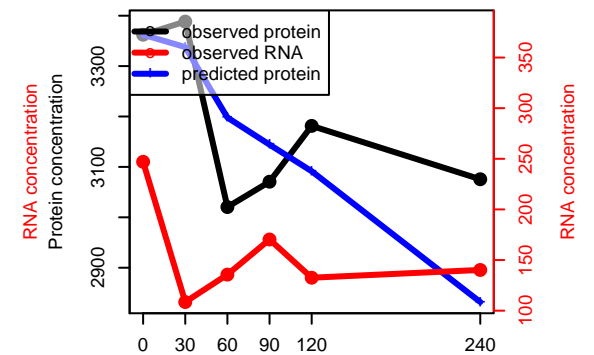

Time (min)  
ks = 0.0776067653075358 kd = 0.00433631769763025

SAC1

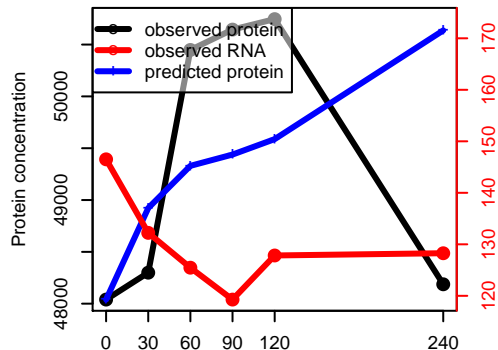

Time (min)  
ks = 1.39441143833478 kd = 0.00339644835633058

IMH1

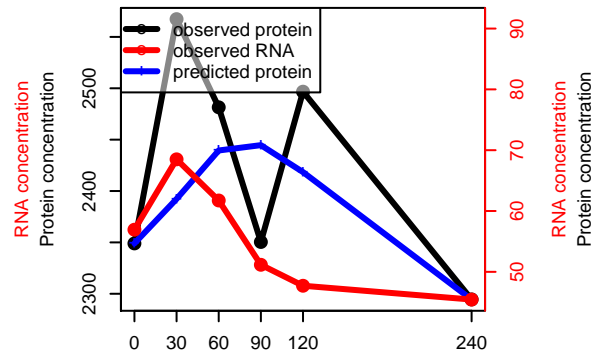

Time (min)  
ks = 0.150410936701927 kd = 0.00339644835633058

CHS5

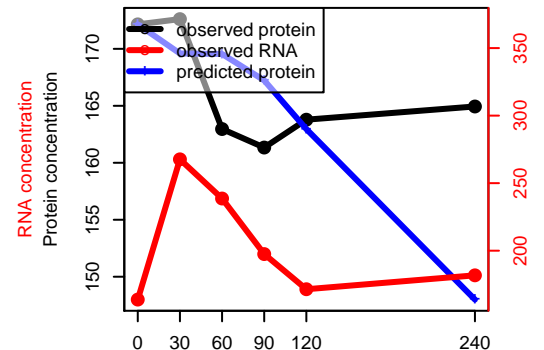

Time (min)  
ks = 0.00227696032584998 kd = 0.00339644835633058

TUB3

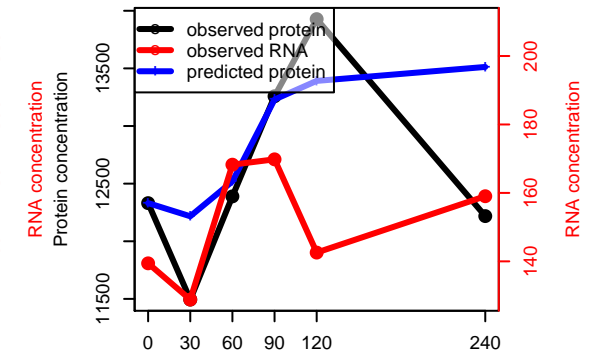

Time (min)  
ks = 0.995771759877144 kd = 0.0111790688877394

SCJ1

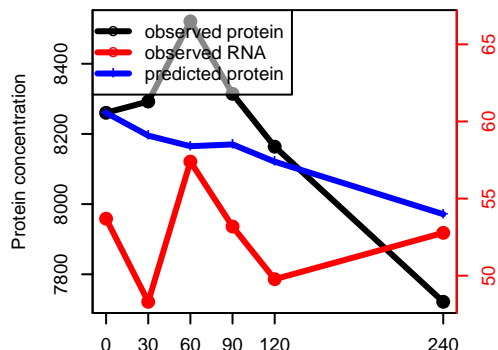

Time (min)  
ks = 0.505852897693678 kd = 0.00339644835633058

NOP15

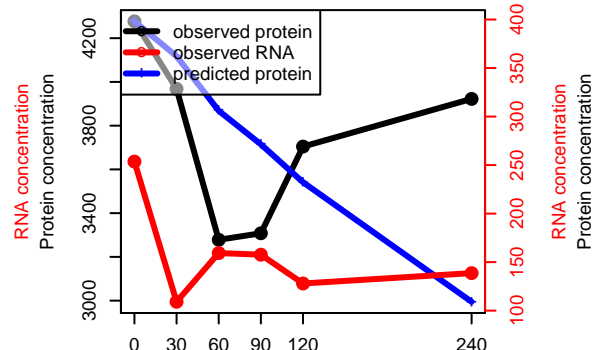

Time (min)  
ks = 0.0906319735578523 kd = 0.00513657119906296

ZIM17

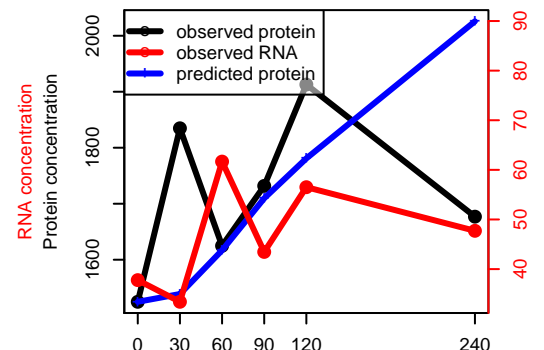

Time (min)  
ks = 0.183319759784086 kd = 0.00389495726276296

RPB11

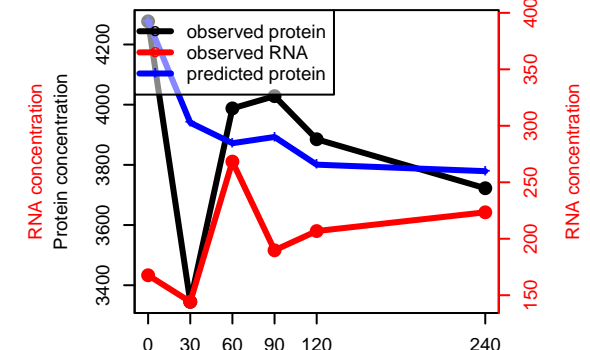

Time (min)  
ks = 0.139336512881455 kd = 0.00801783059141913

RPB8

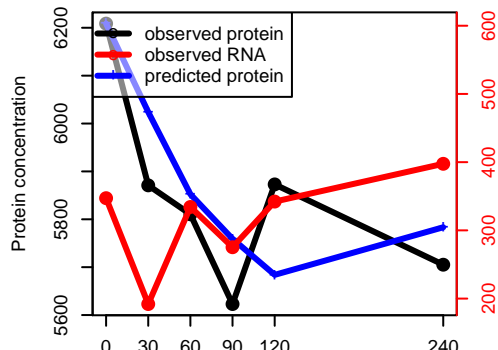

Time (min)  
ks = 0.054666375563949 kd = 0.00339644835633058

HHO1

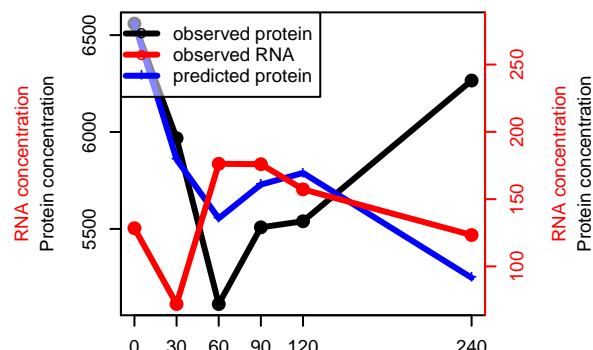

Time (min)  
ks = 0.314020791255671 kd = 0.00876402711947788

NIP7

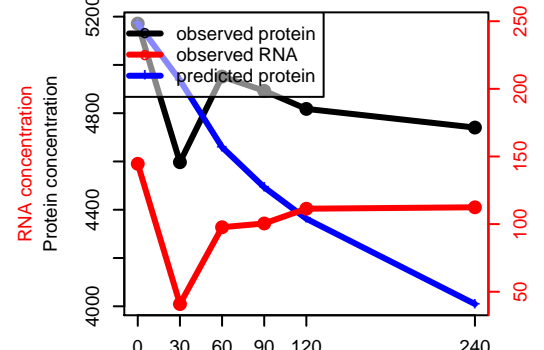

Time (min)  
ks = 0.100965543586269 kd = 0.00339644835633058

YME1

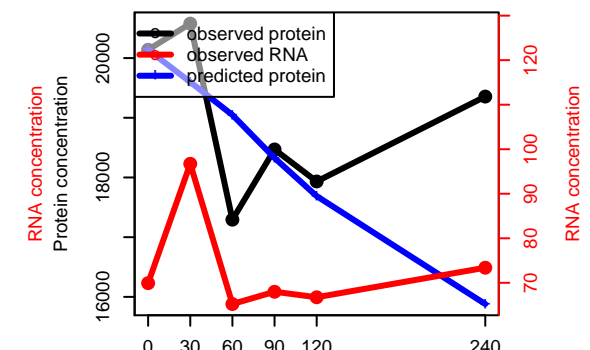

Time (min)  
ks = 0.590007325010077 kd = 0.00339644835633058



RDH54

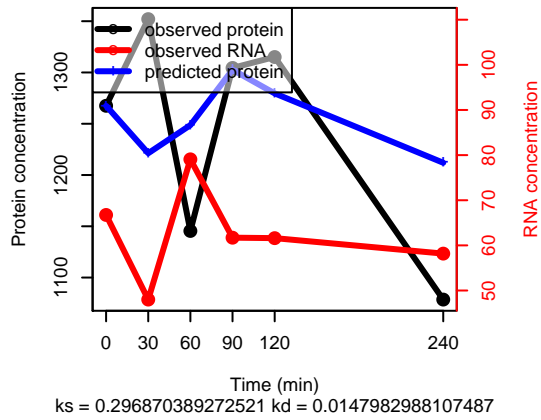

GIR2

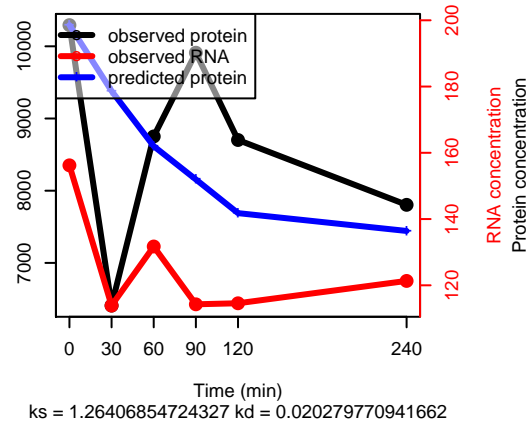

RRP17

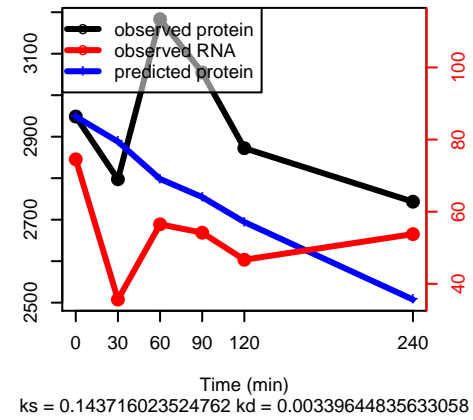

PHO8

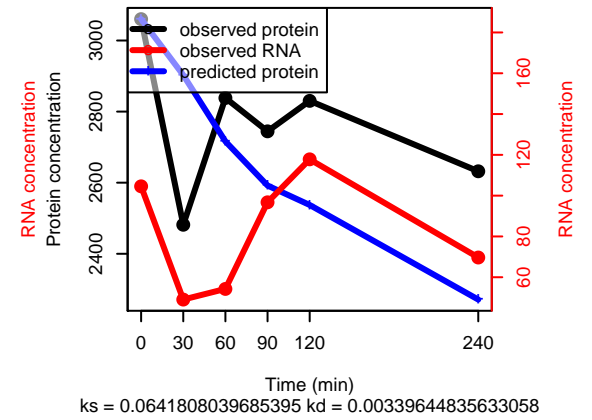

RPS8B

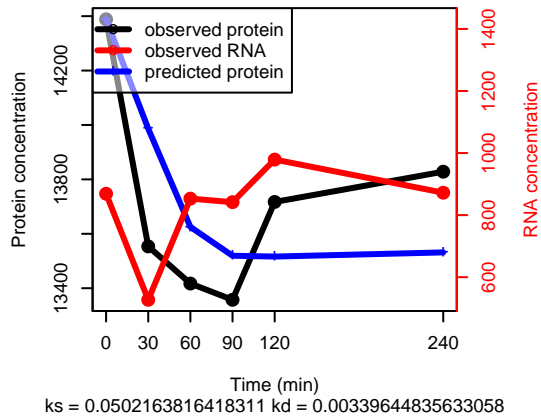

NPY1

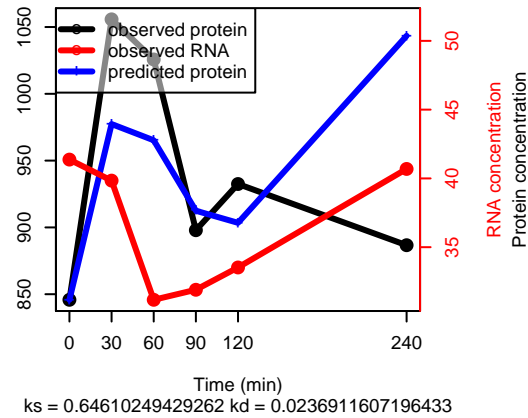

SMI1

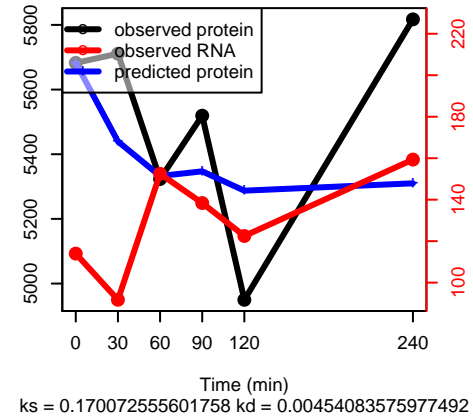

ECM14

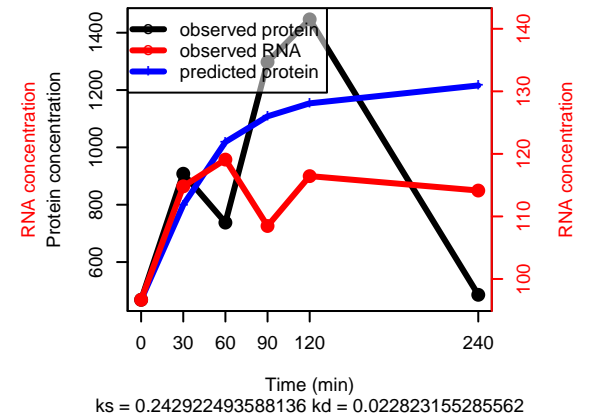

BAR1

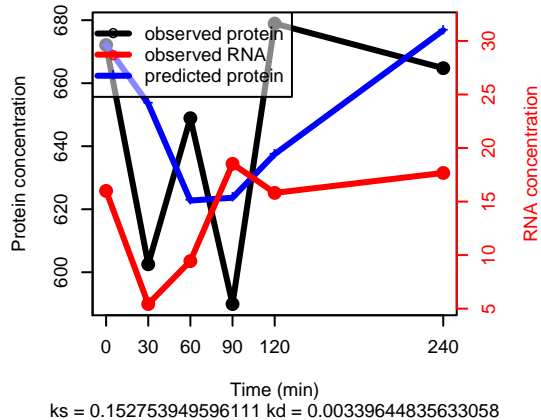

TED1

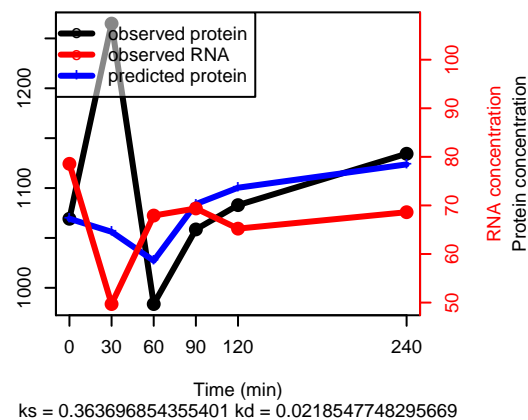

MTD1

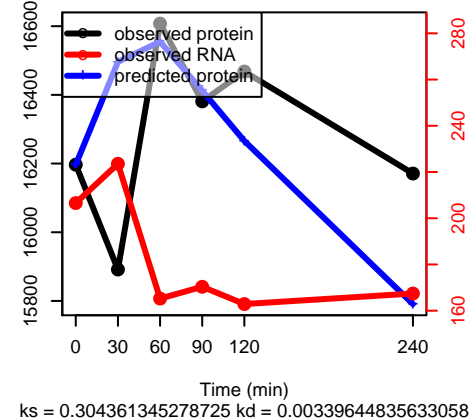

PWP1

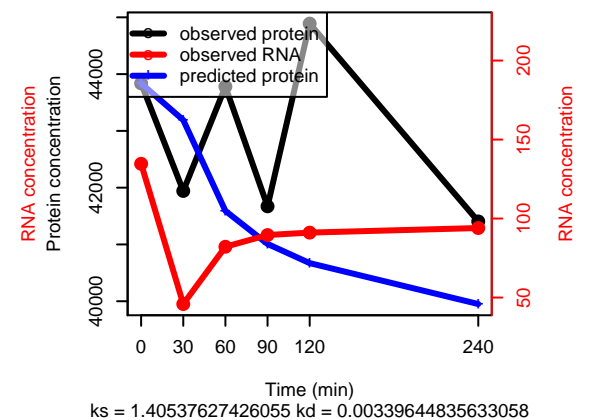

NNT1

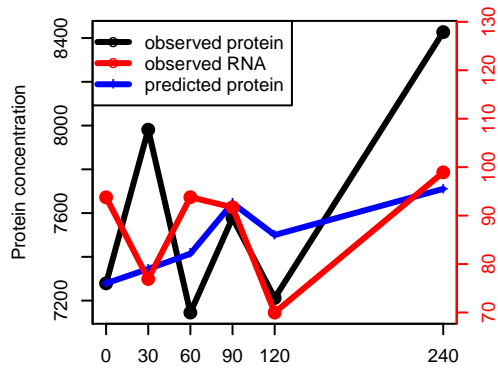

DUS3

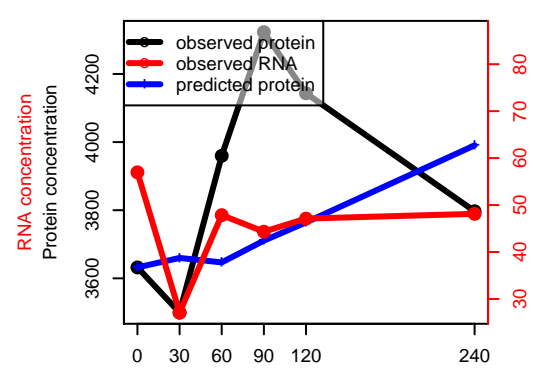

RTS1

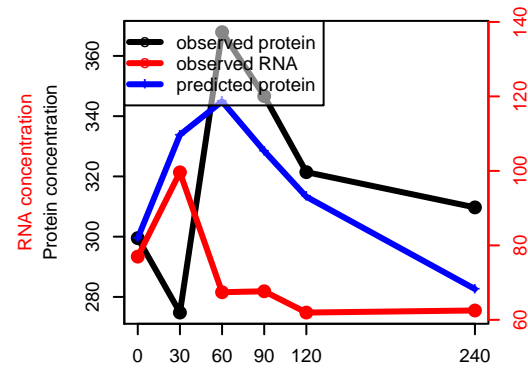

YOR021C

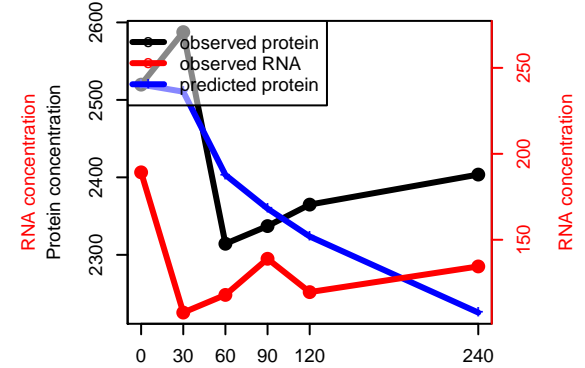

LEU9

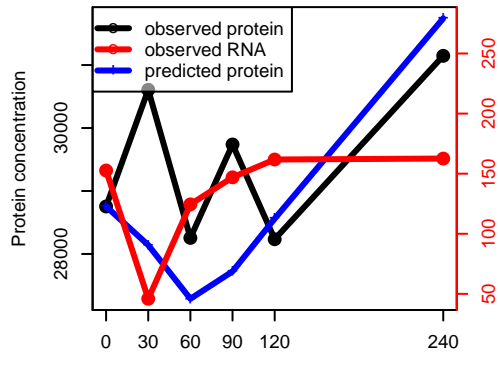

GCD1

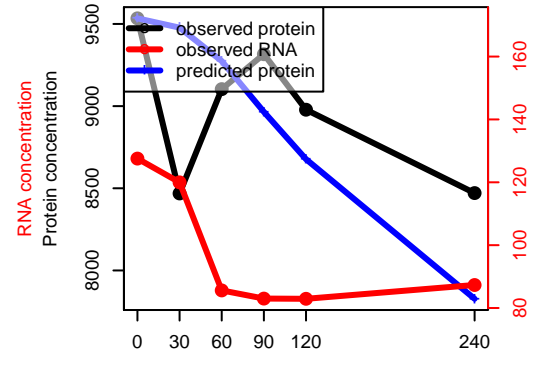

TOS1

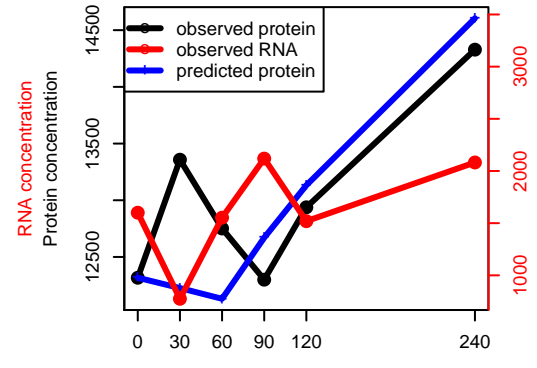

UBP1

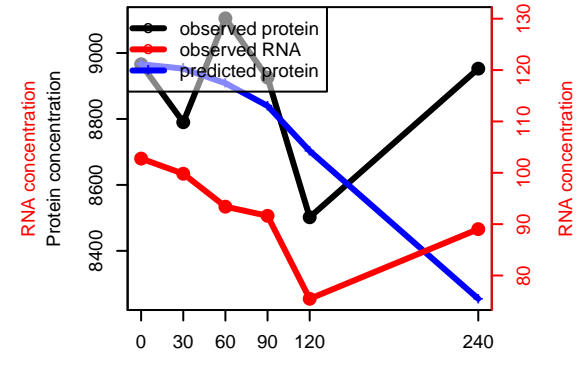

FPR2

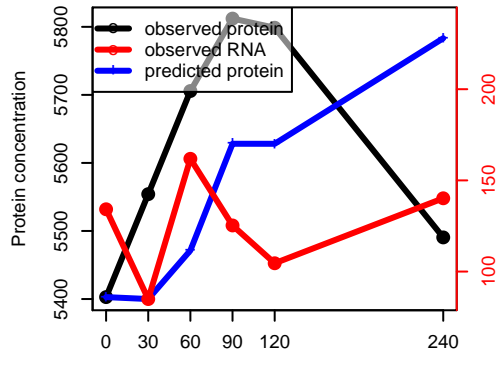

UBP3

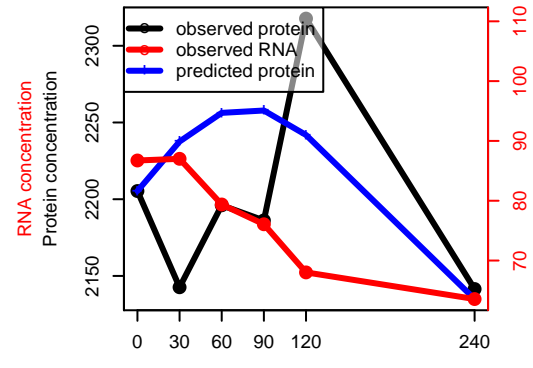

RPL24B

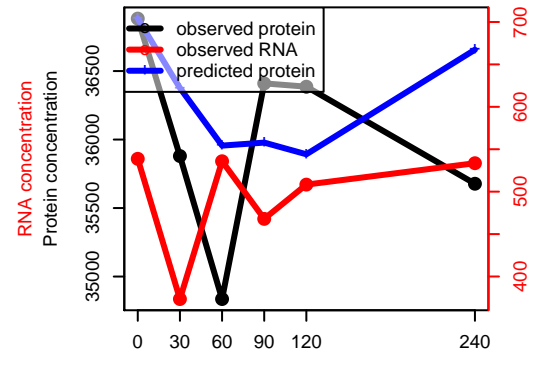

FAA3

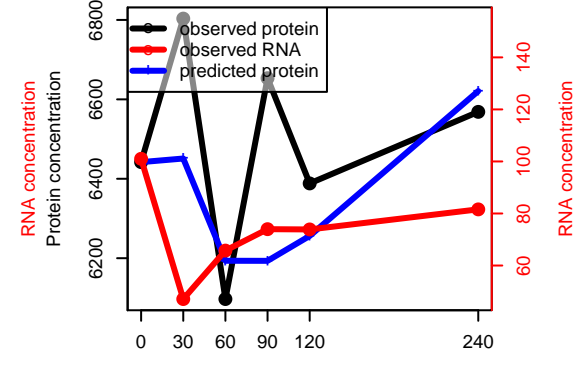

TRL1

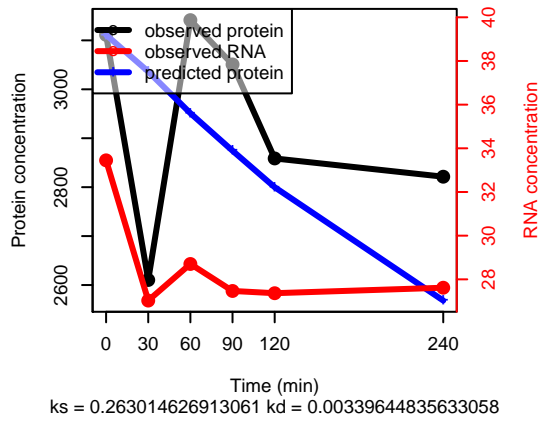

DBP7

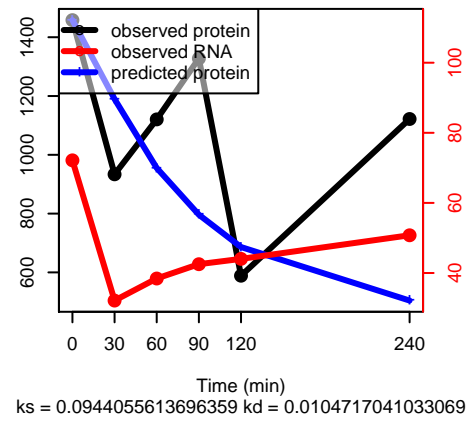

RPS22B

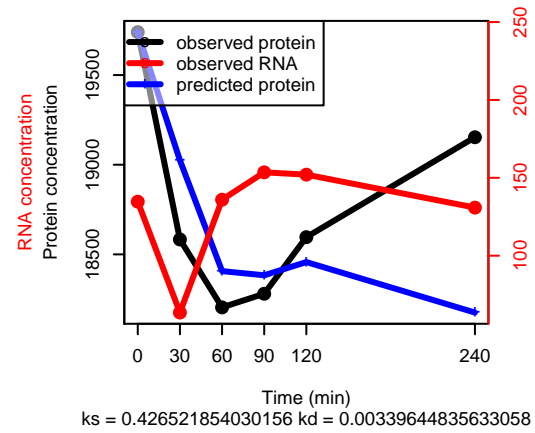

RPS29A

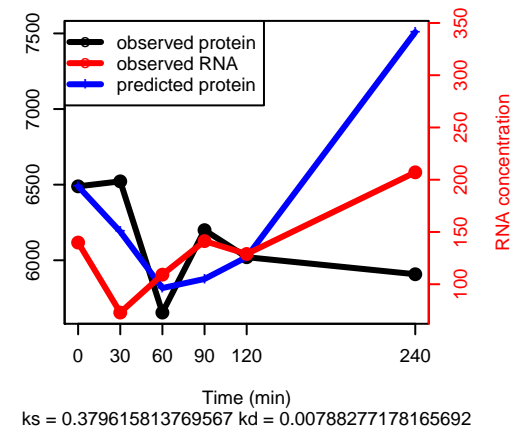

UBX2

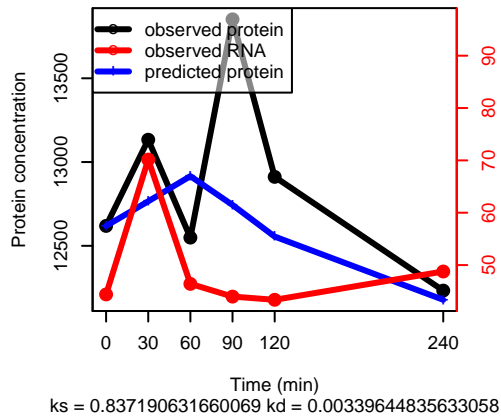

YMR074C

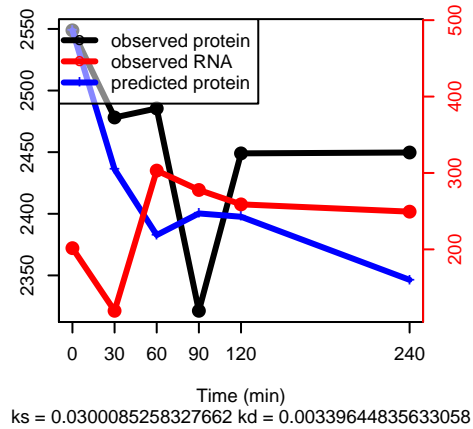

ARP5

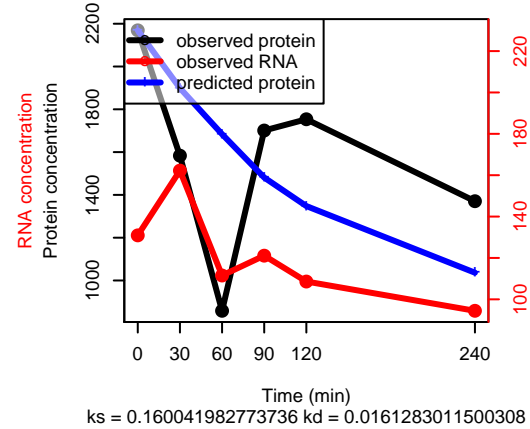

RRP40

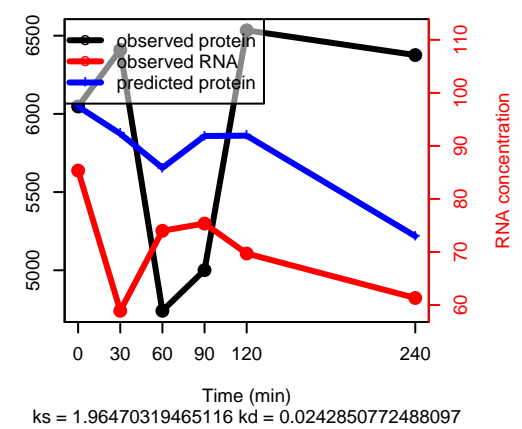

TMA46

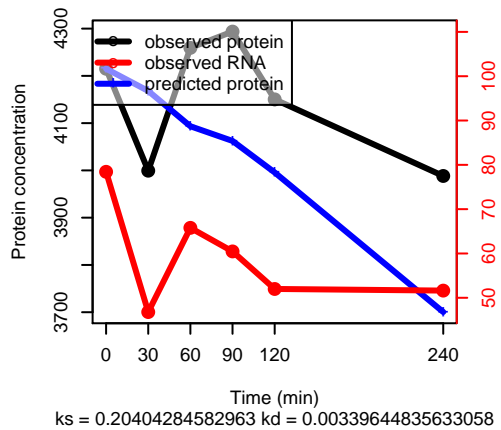

SVL3

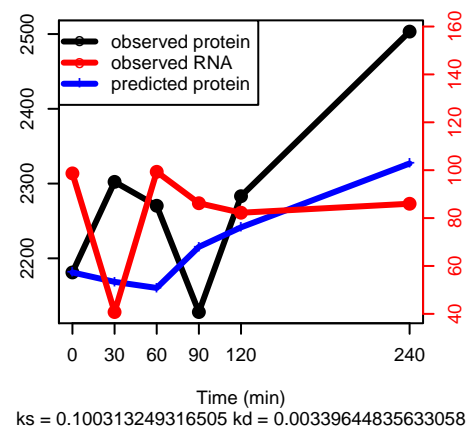

RPL21B

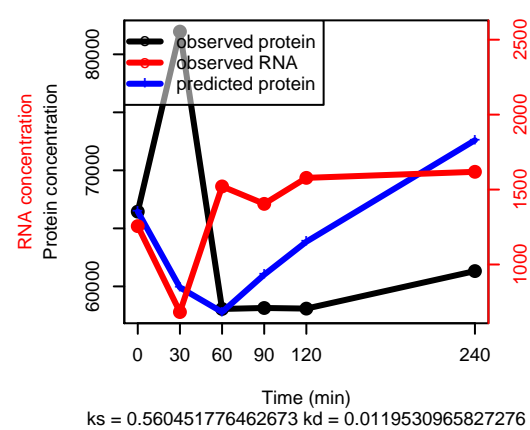

ERP1

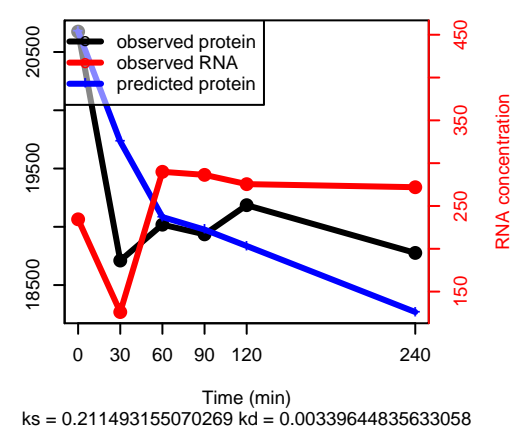

BUD23

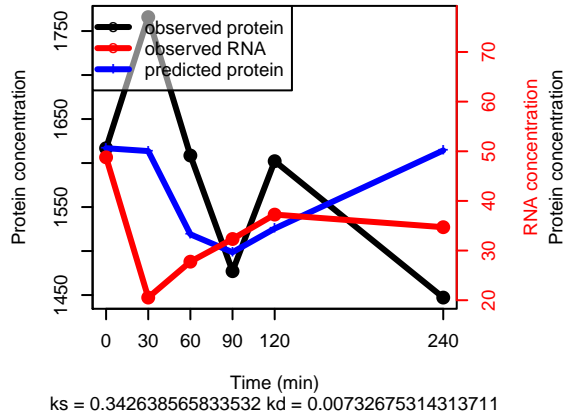

SYO1

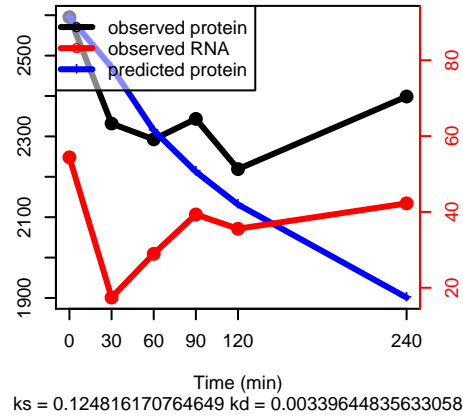

LEU1

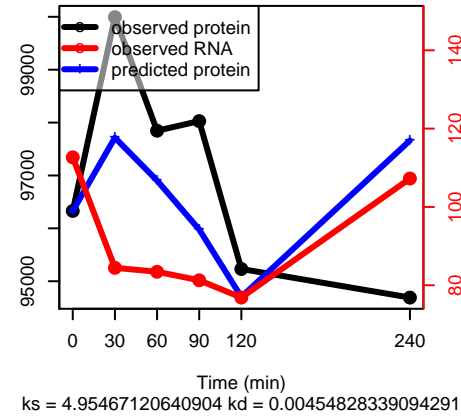

RPL24A

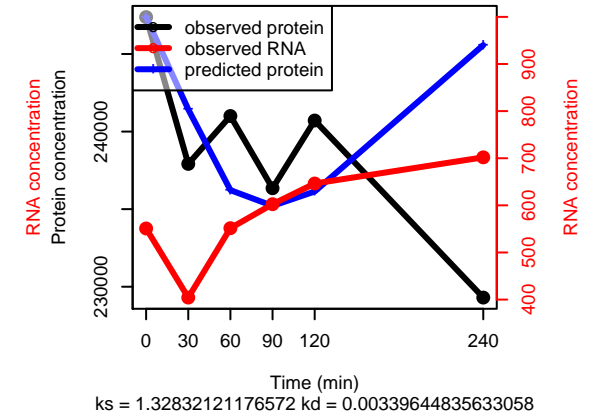

VMA7

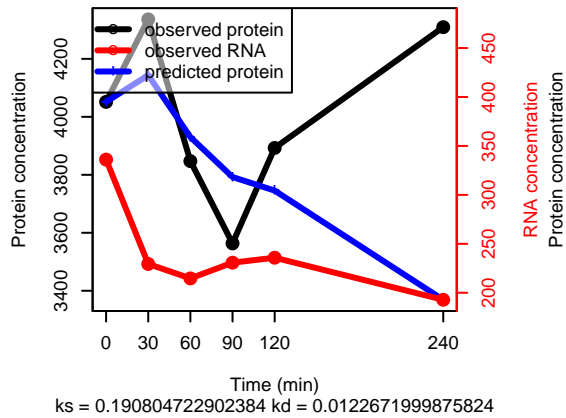

VAS1

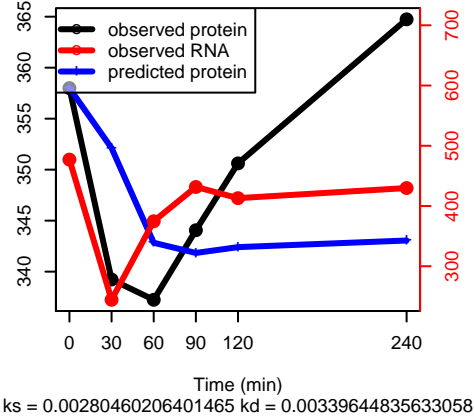

THR1

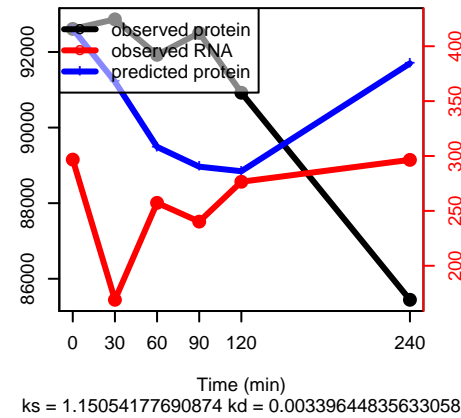

HCA4

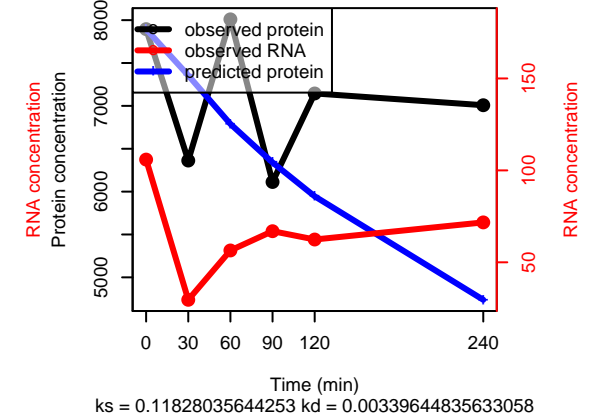

DPH2

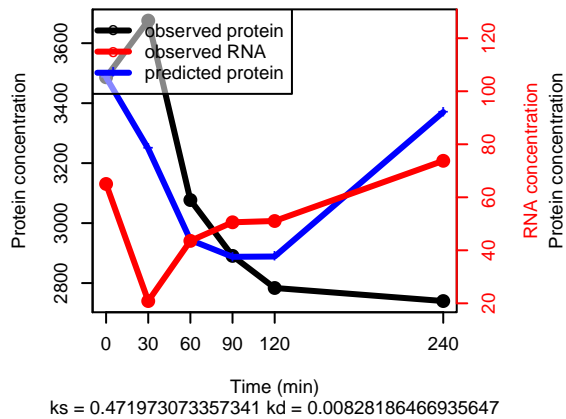

SOF1

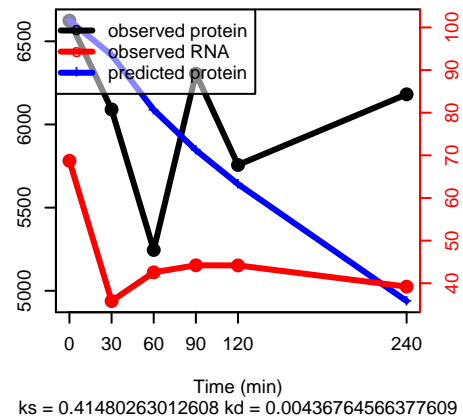

BUD6

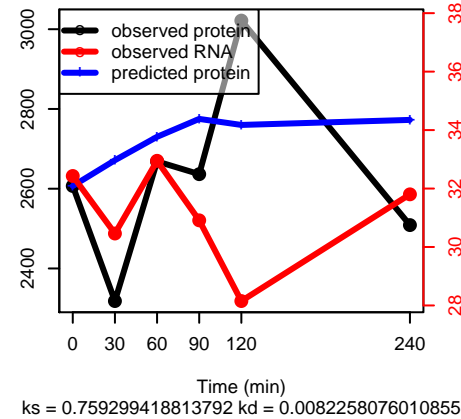

ALO1

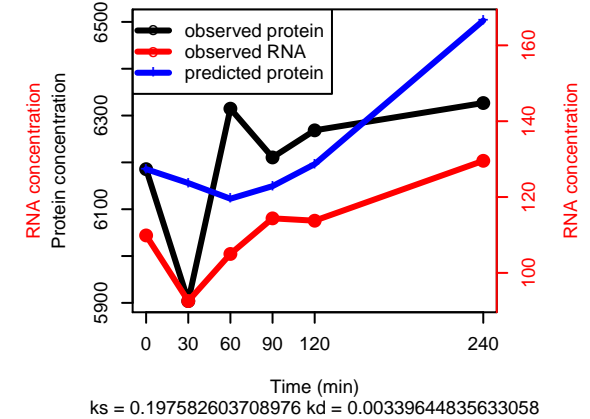

STO1

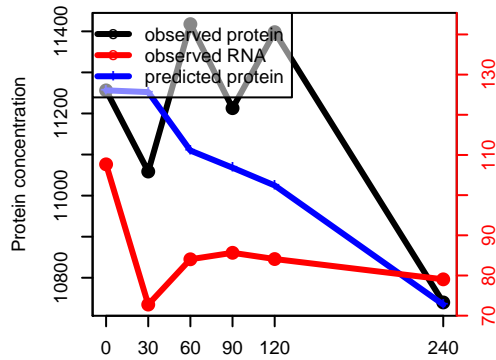

Time (min)  
ks = 0.42444657649391 kd = 0.00339644835633058

POM152

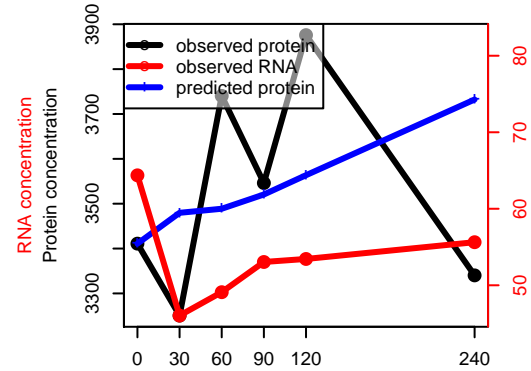

Time (min)  
ks = 0.254771222033437 kd = 0.00339644835633058

ERG12

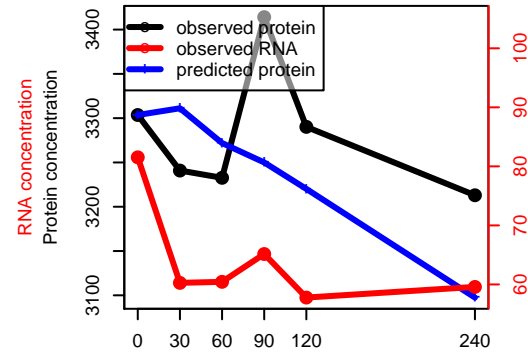

Time (min)  
ks = 0.16338175516131 kd = 0.00339644835633058

PHO23

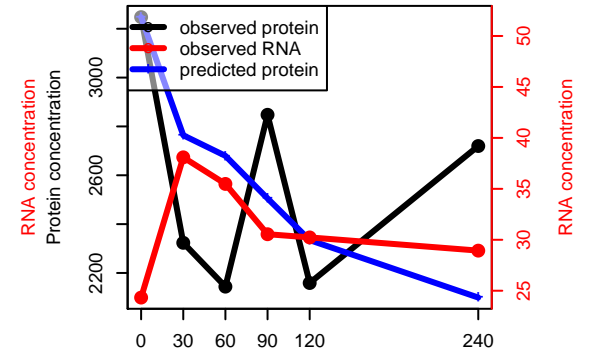

Time (min)  
ks = 1.59119065504495 kd = 0.02247886098057

YCK2

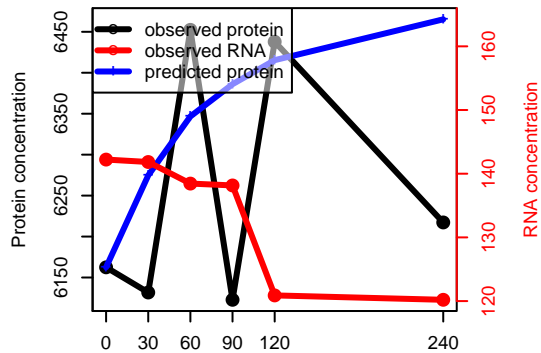

Time (min)  
ks = 0.358192357887181 kd = 0.00757826380550467

YOL098C

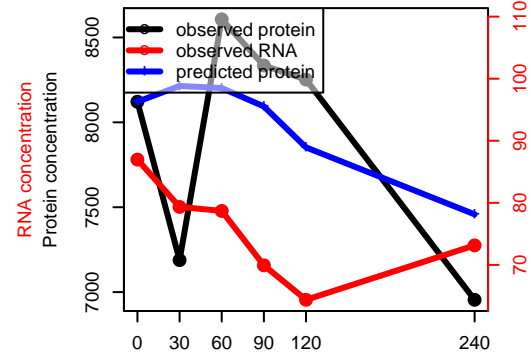

Time (min)  
ks = 0.808300258438616 kd = 0.00784436972289643

RPL33B

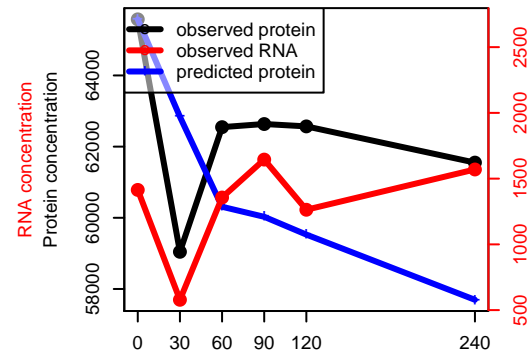

Time (min)  
ks = 0.128213633848391 kd = 0.00339644835633058

TYW1

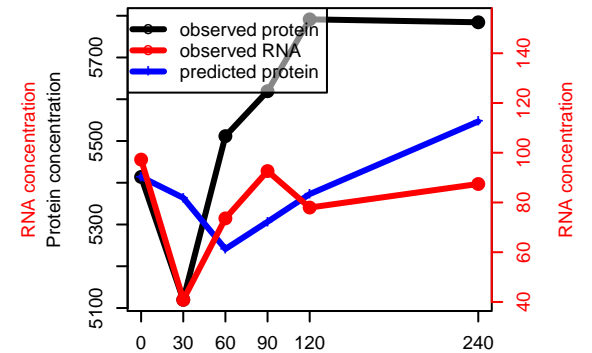

Time (min)  
ks = 0.241922646272826 kd = 0.00339644835633058

RPS23B

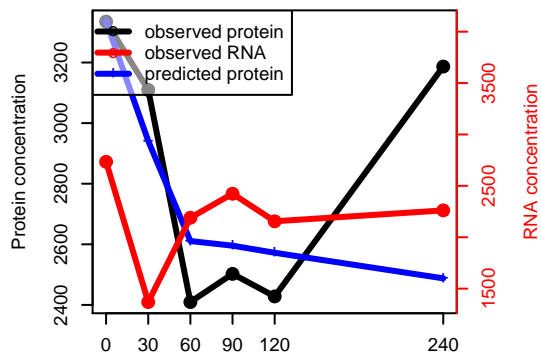

Time (min)  
ks = 0.0161501139394708 kd = 0.0145709671390483

ILS1

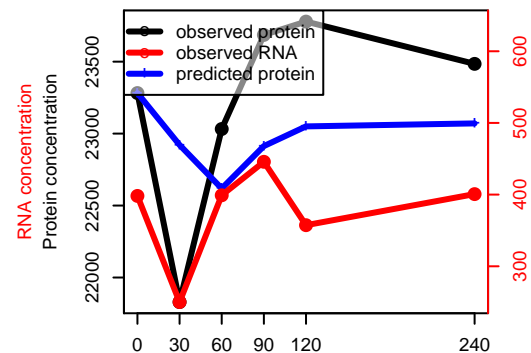

Time (min)  
ks = 0.206461459625746 kd = 0.00339644835633058

UTP6

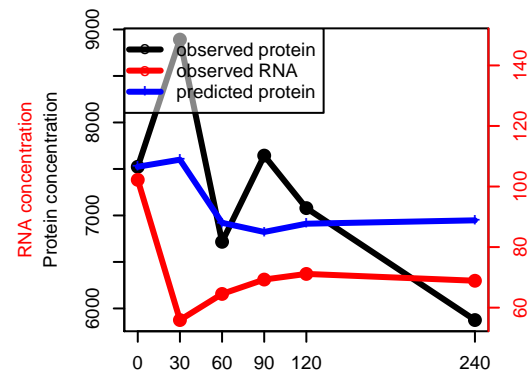

Time (min)  
ks = 1.95959848977098 kd = 0.0195777872535968

PRS2

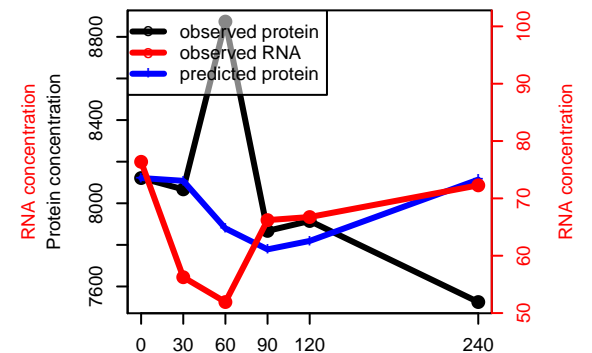

Time (min)  
ks = 0.643925171814719 kd = 0.00530237703559948

GAR1

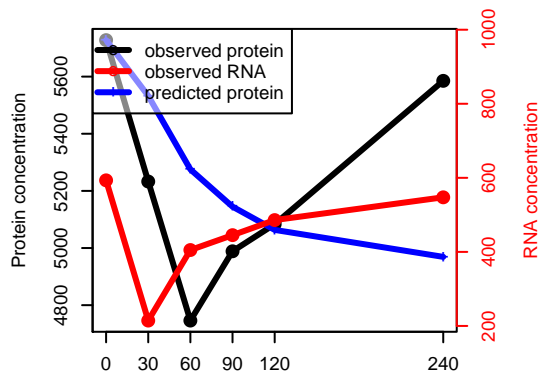

Time (min)  
ks = 0.0315292240342297 kd = 0.00341018240157809

SOL3

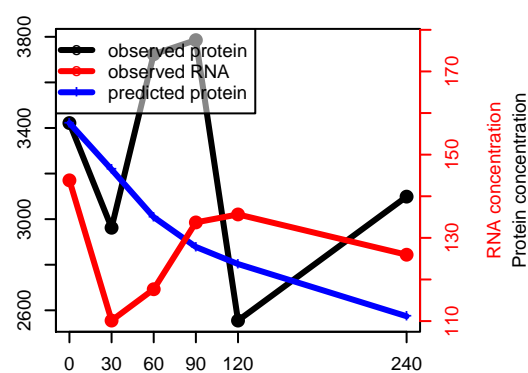

Time (min)  
ks = 0.123806557756546 kd = 0.00678110899170354

NIP1

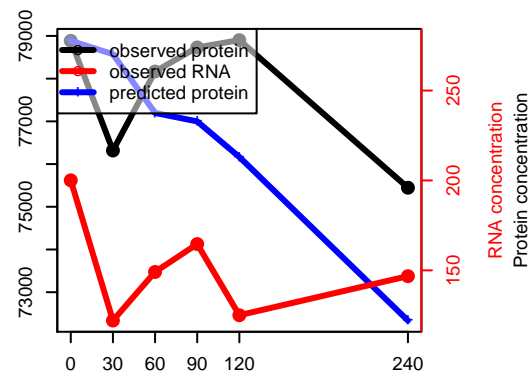

Time (min)  
ks = 1.60881165819759 kd = 0.00339644835633058

YNL010W

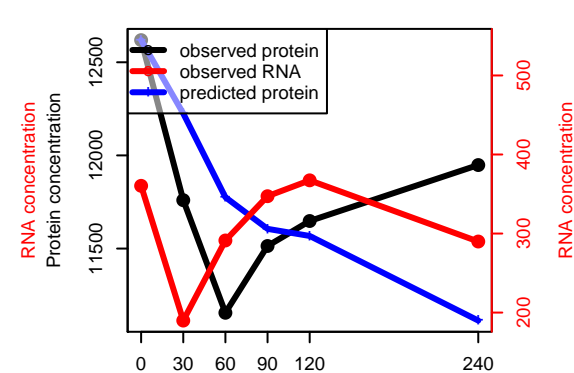

Time (min)  
ks = 0.106626260664963 kd = 0.00339644835633058

SSB2

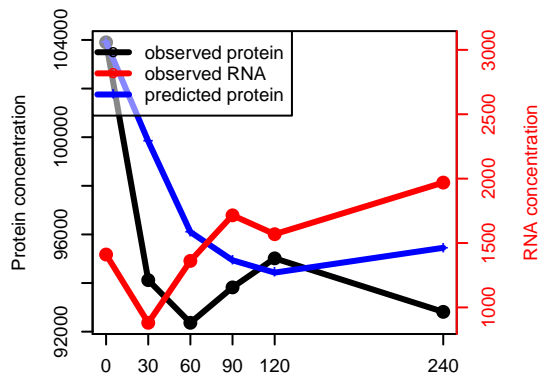

Time (min)  
ks = 0.184929673052234 kd = 0.00339644835633058

RPS19A

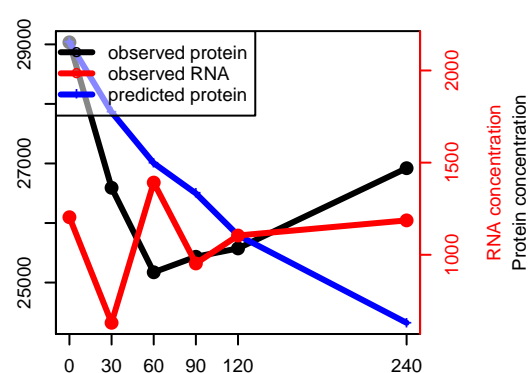

Time (min)  
ks = 0.0632557914014159 kd = 0.00339644835633058

GLN4

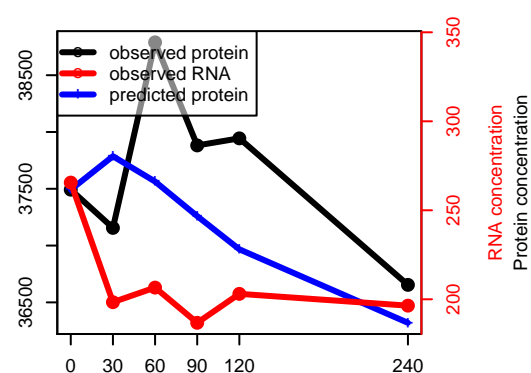

Time (min)  
ks = 0.594937352237201 kd = 0.00339644835633058

SEC63

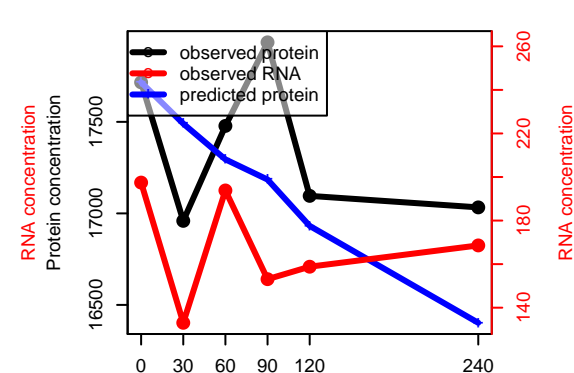

Time (min)  
ks = 0.318389295482058 kd = 0.00339644835633058

CCR4

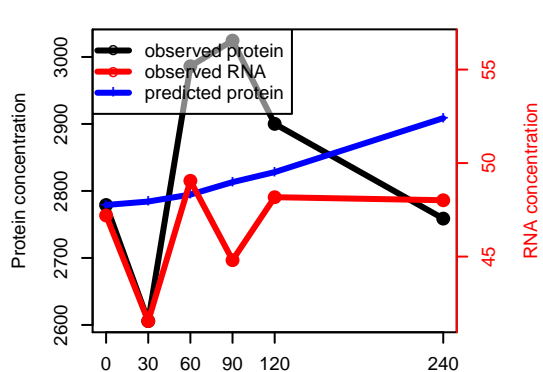

Time (min)  
ks = 0.217047171429746 kd = 0.00339644835633058

PMT1

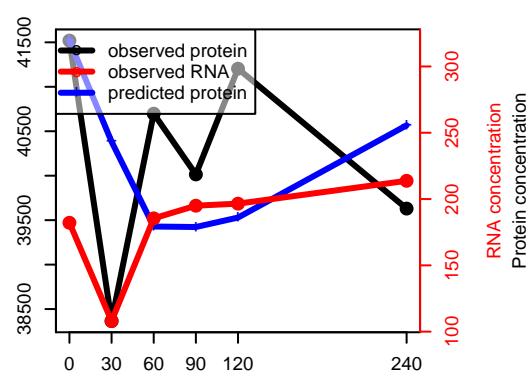

Time (min)  
ks = 0.702941991051031 kd = 0.00339644835633058

ADE8

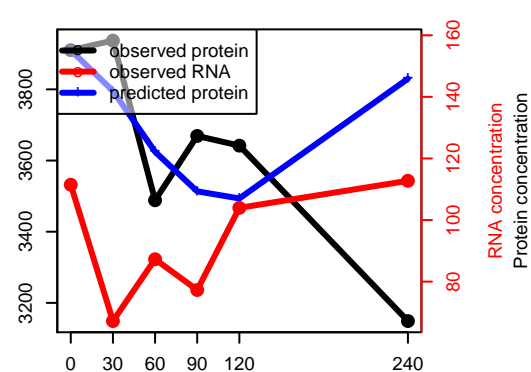

Time (min)  
ks = 0.262679713205133 kd = 0.00704003940100831

TOM1

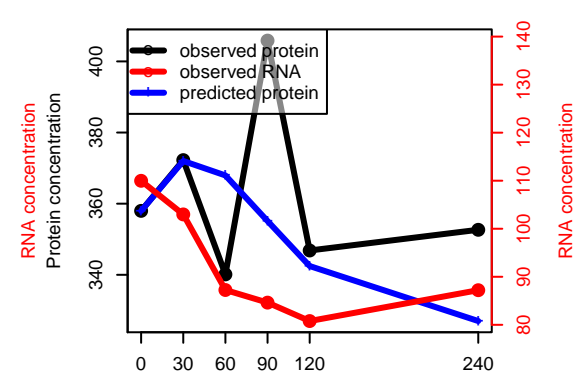

Time (min)  
ks = 0.045802959995169 kd = 0.0120462151869417



RFA3

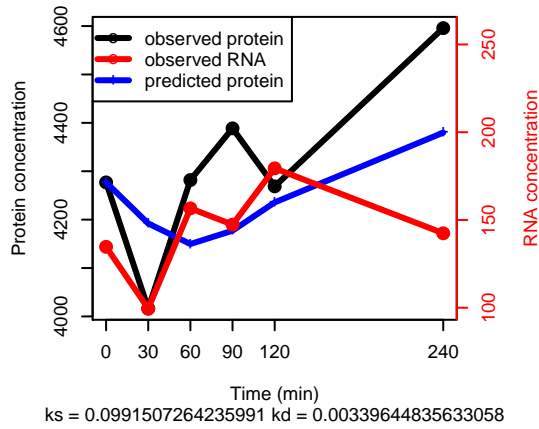

YNR021W

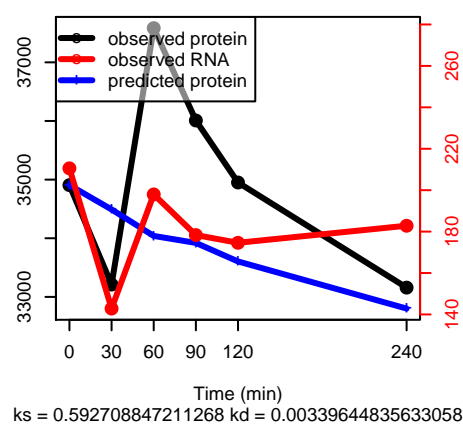

RAS1

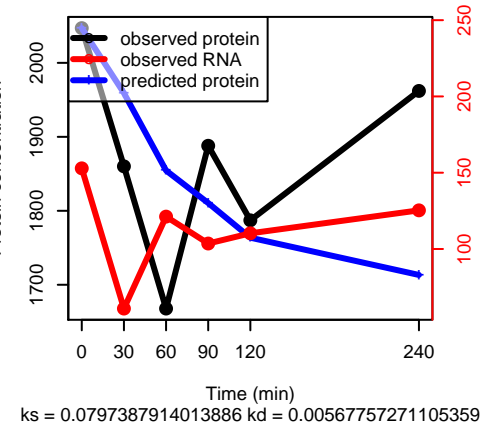

MRN1

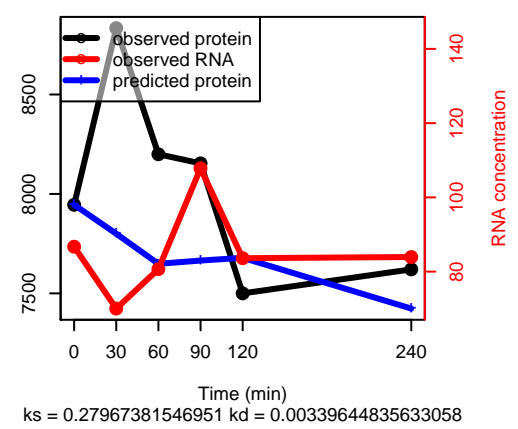

PUS1

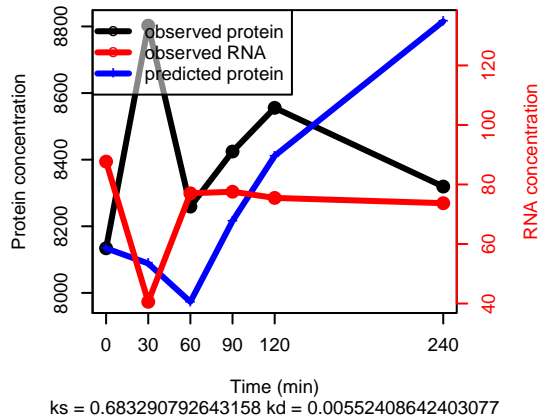

NEW1

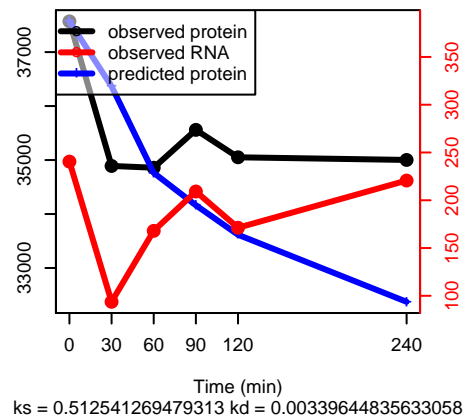

KEL3

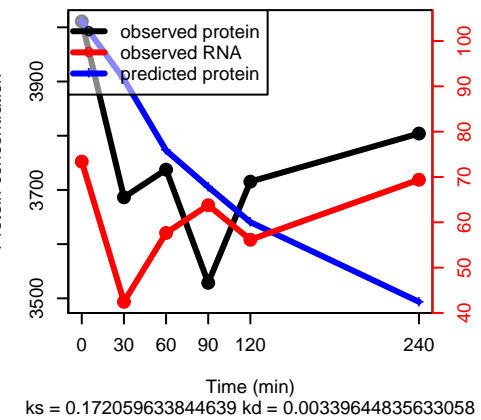

SGV1

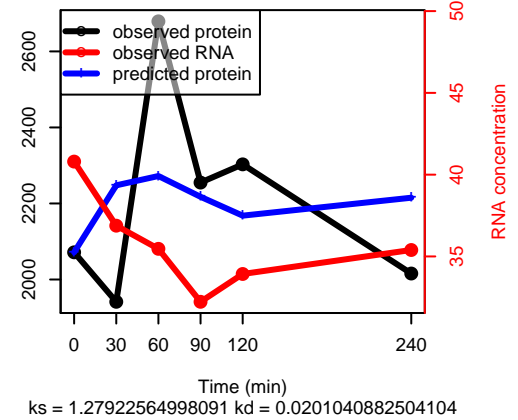

CDC39

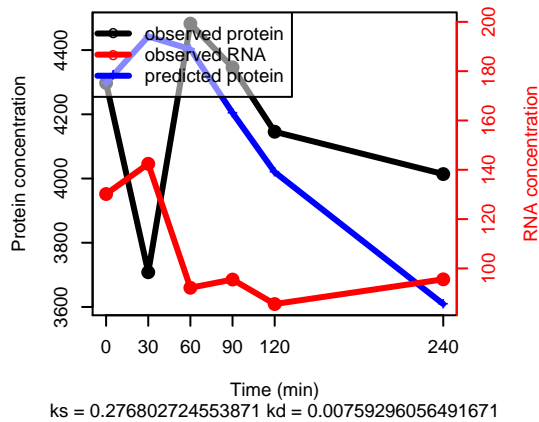

UBC9

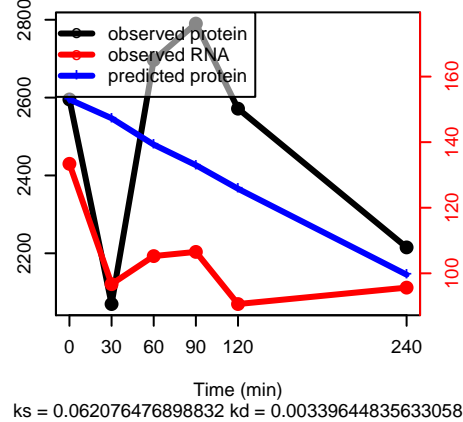

SSB1

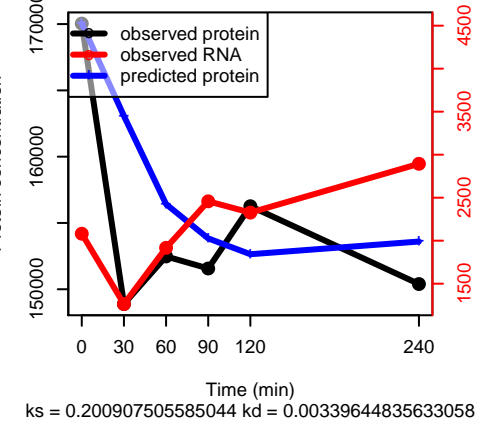

HXT3

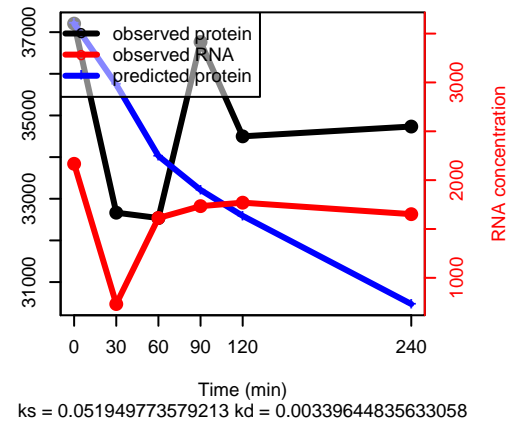

ESF1

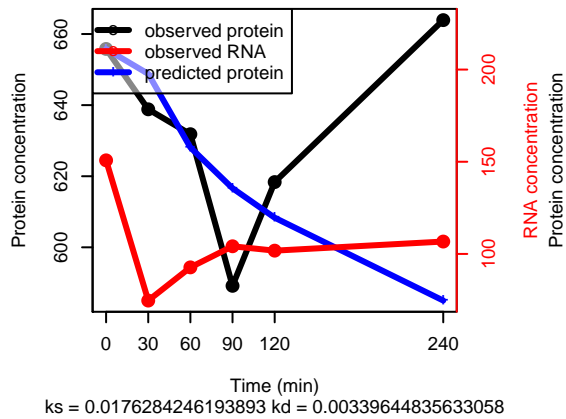

GIM4

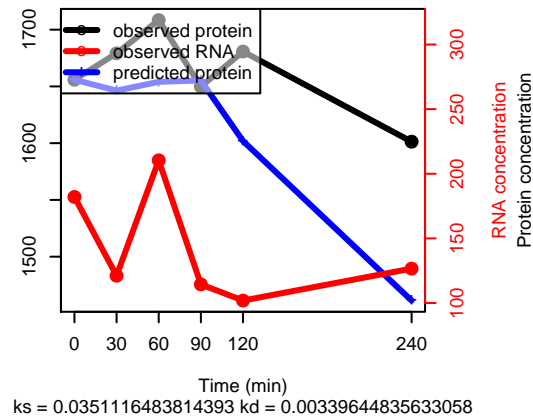

GLY1

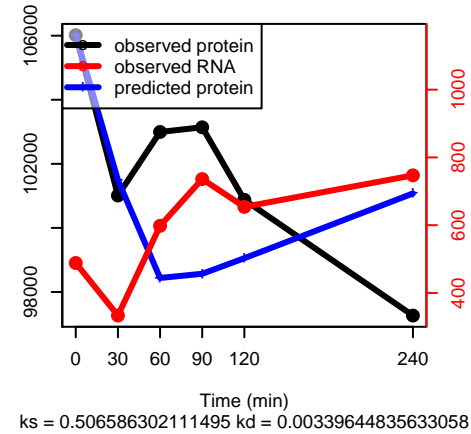

PTC2

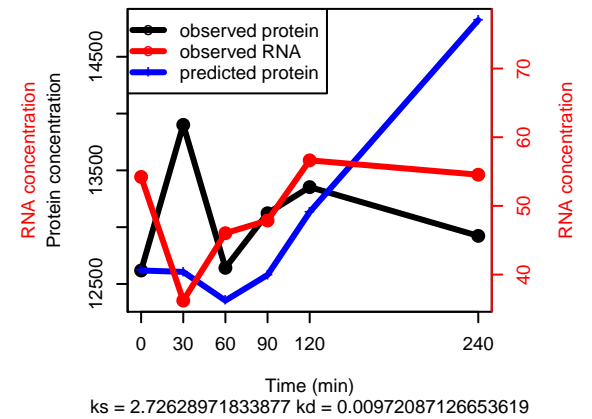

EMP47

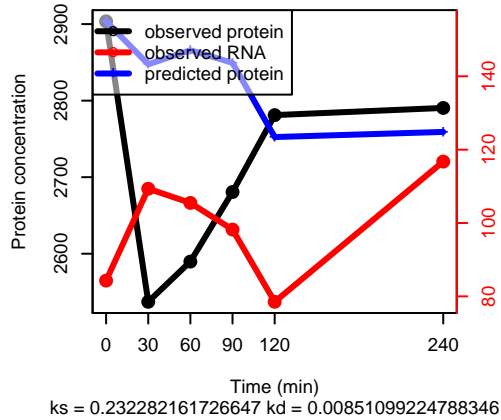

RPL26B

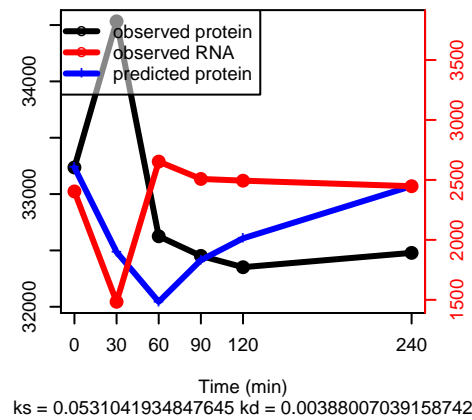

ESS1

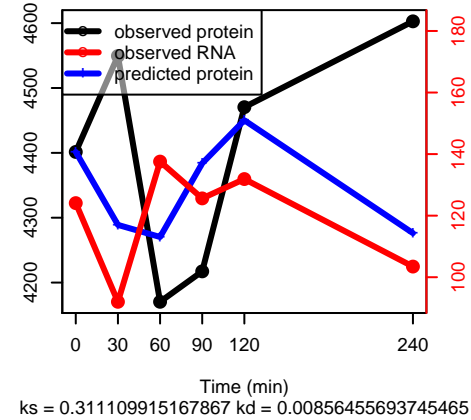

OSM1

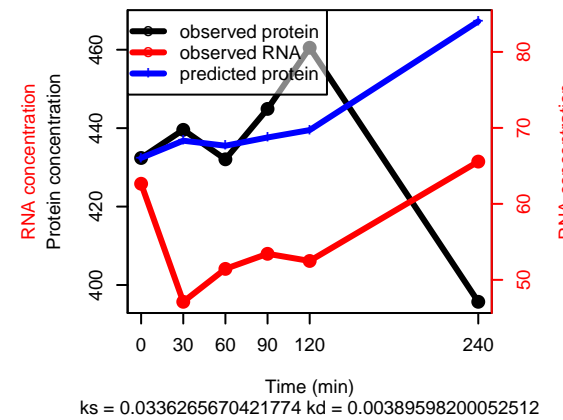

MNS1

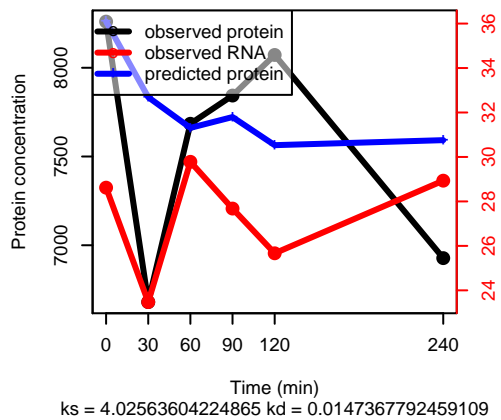

URA6

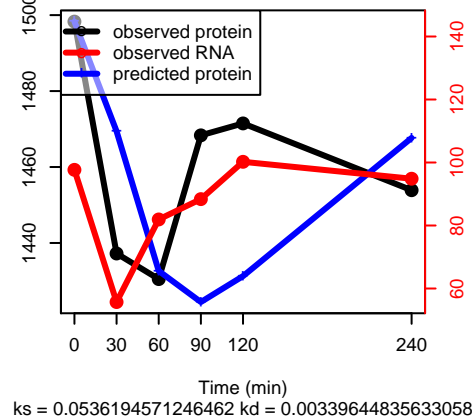

SRP102

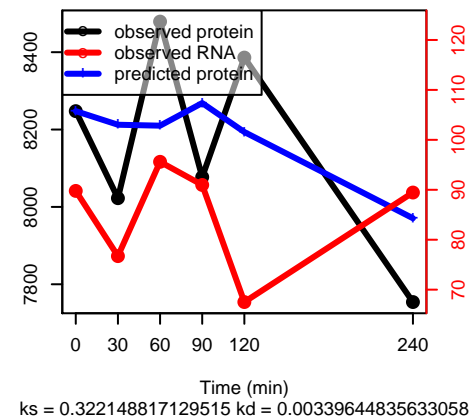

GCN3

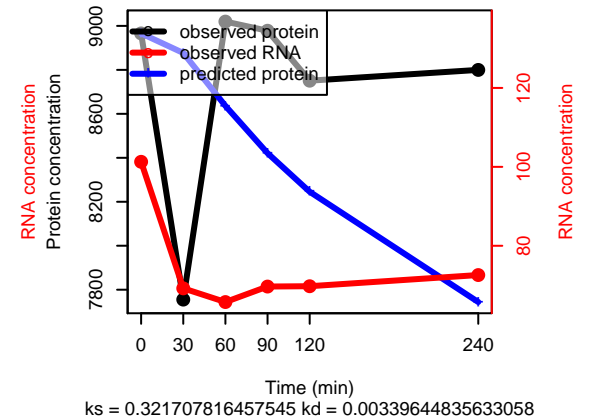

KAP95

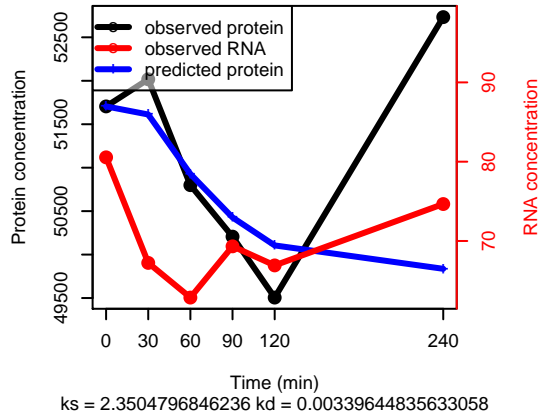

RAD52

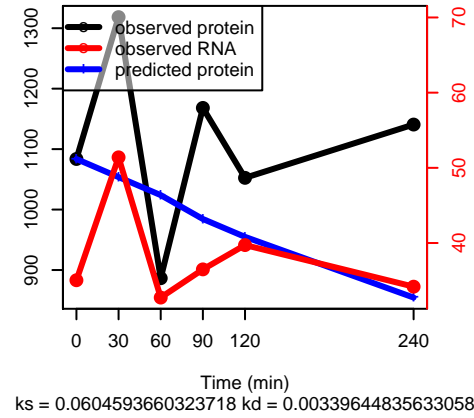

NAM7

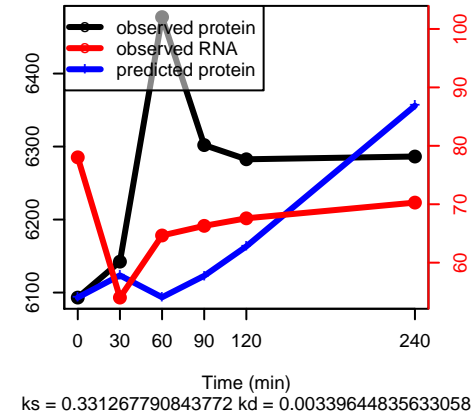

TOP2

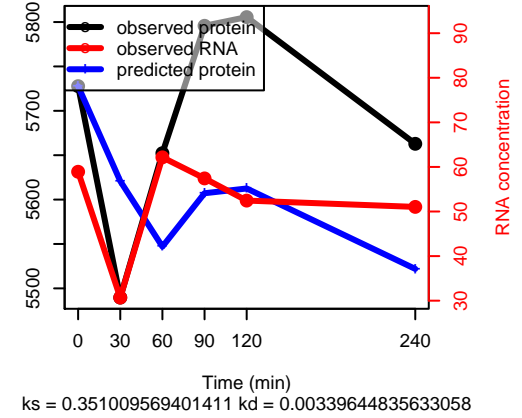

YNL247W

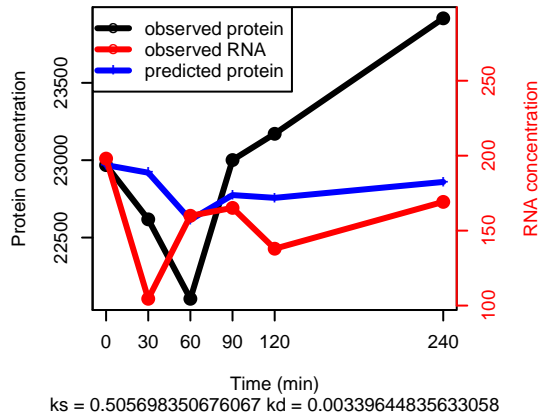

LEO1

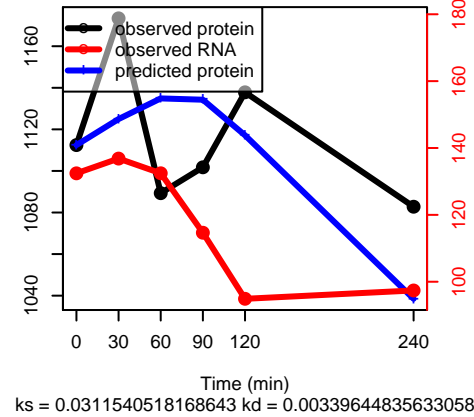

RPS28A

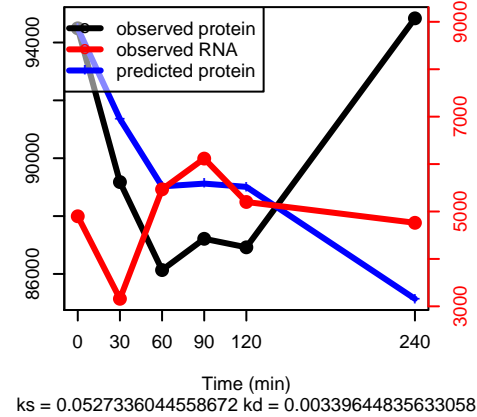

ABP140

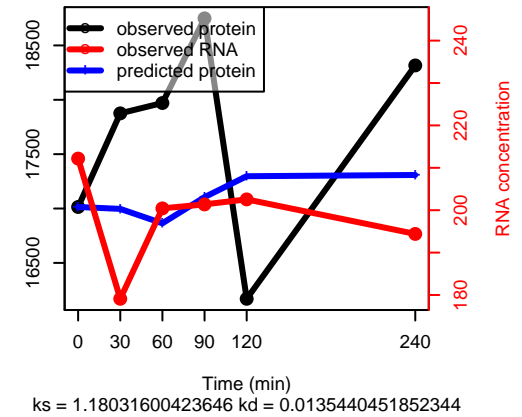

ISW2

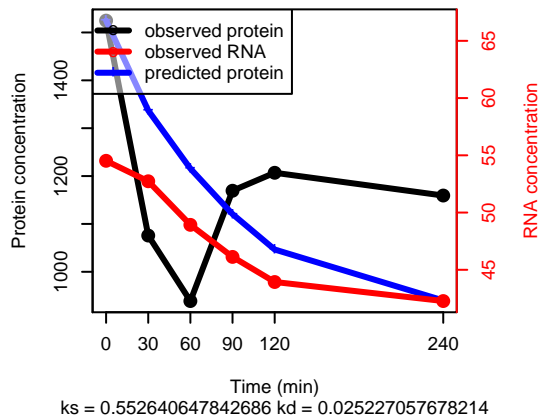

SRP72

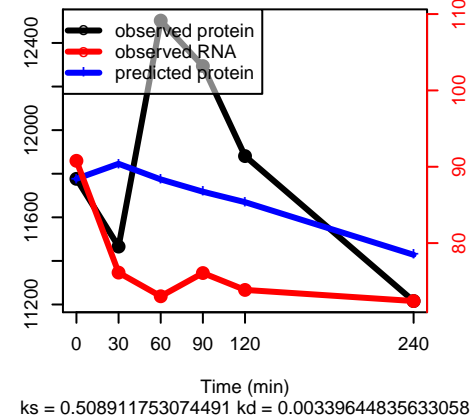

MCM4

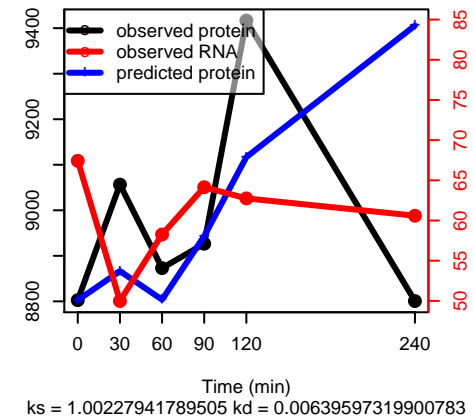

RXT2

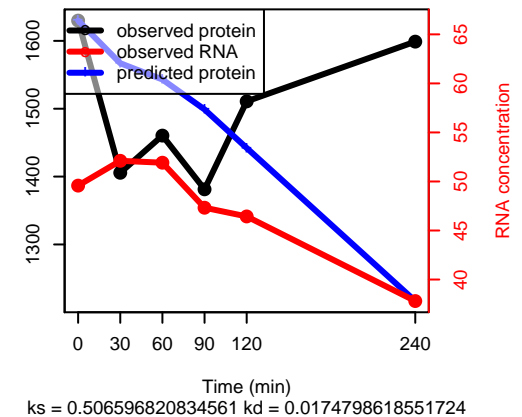

TAF5

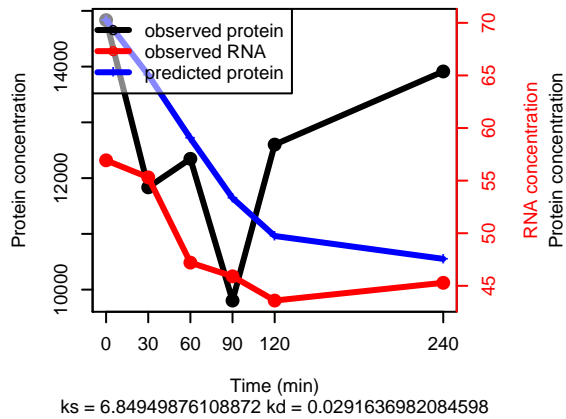

ARF1

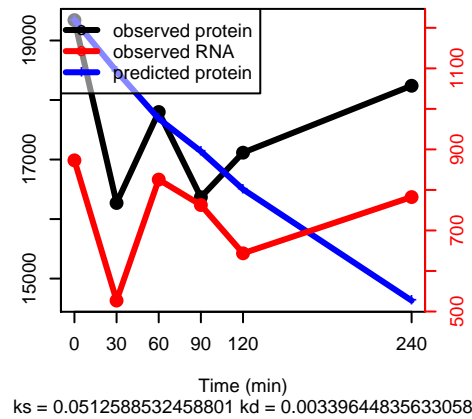

RRP1

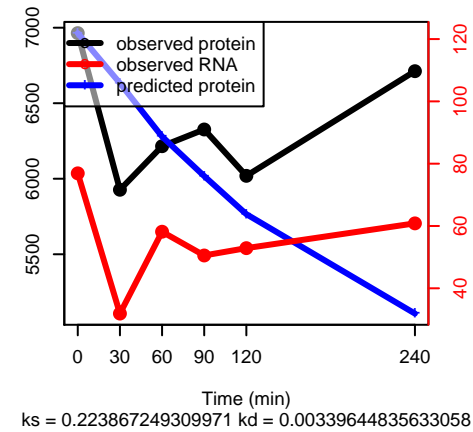

RLI1

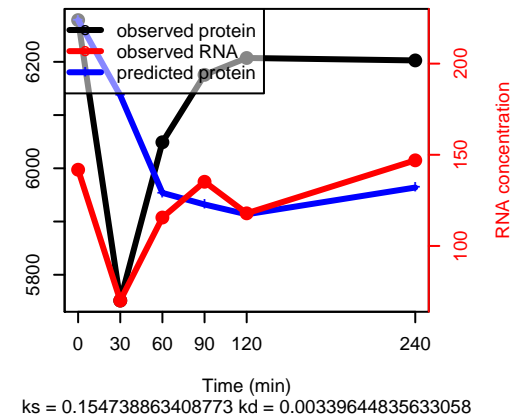

SMC1

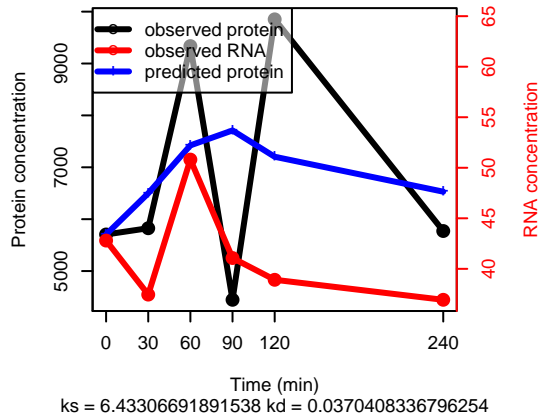

RGD2

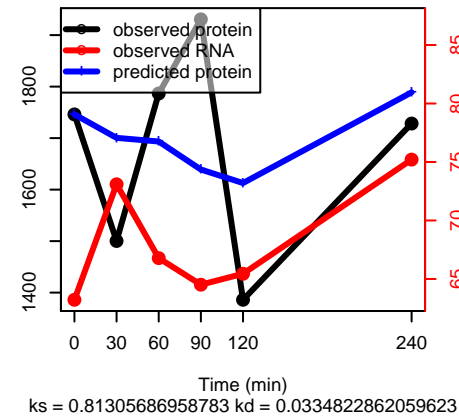

YRB30

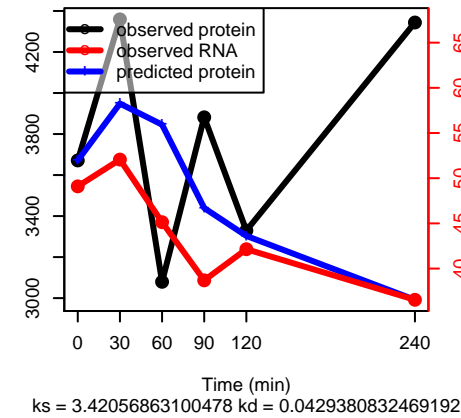

ARD1

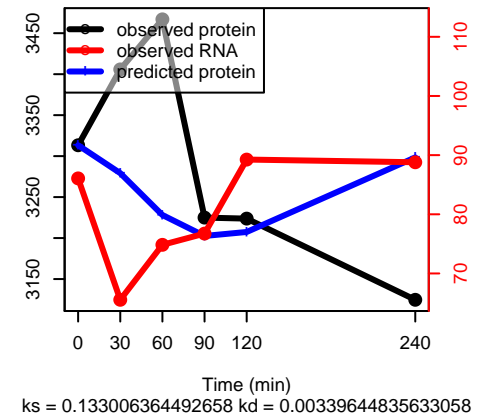

PPX1

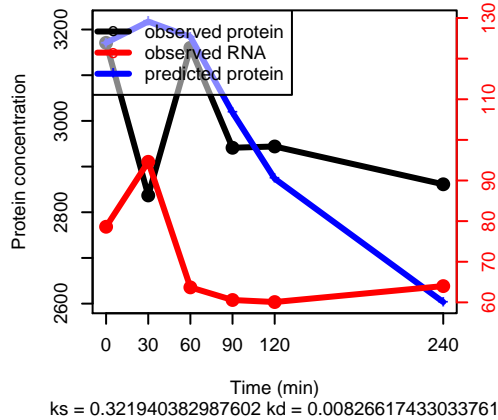

RHO3

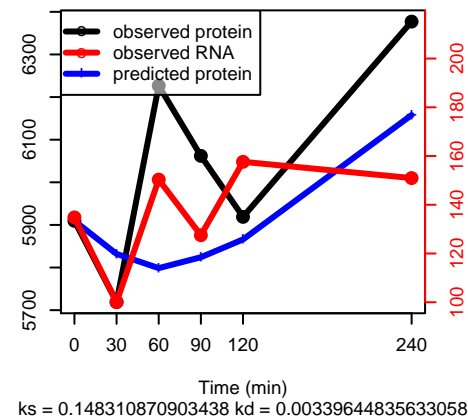

YKE2

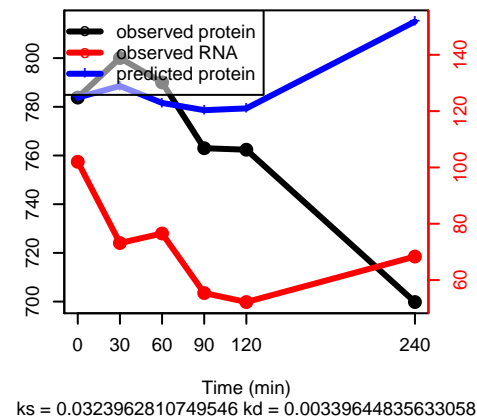

SEC14

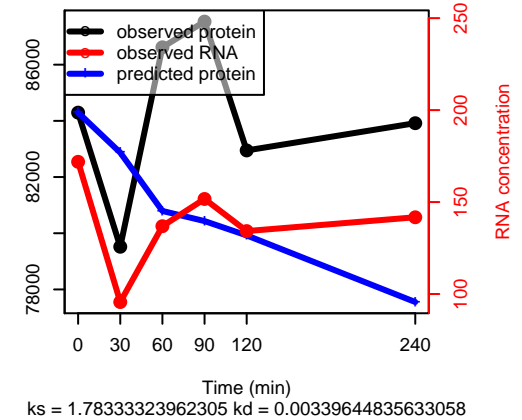

RPL9B

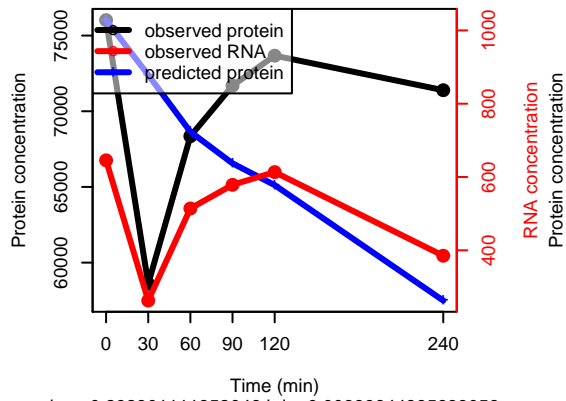

SPN1

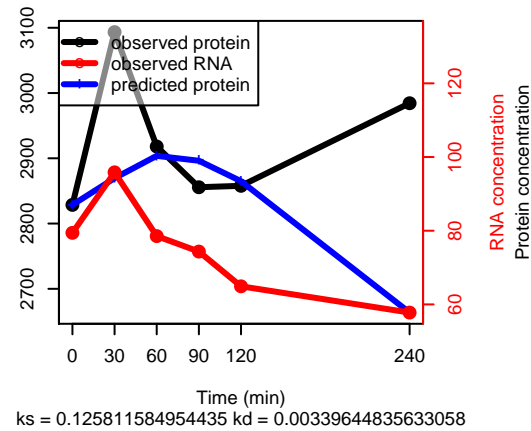

PHO3

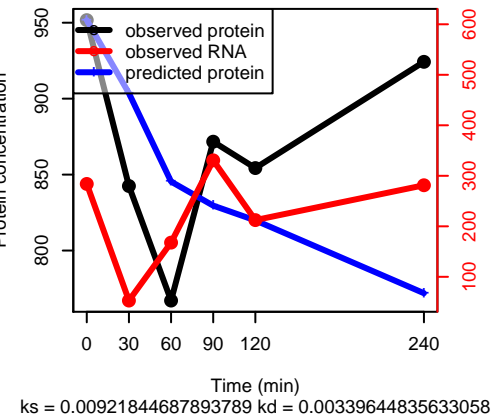

SEC7

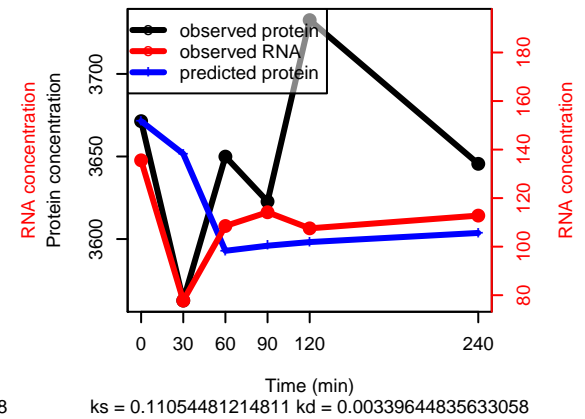

BUR6

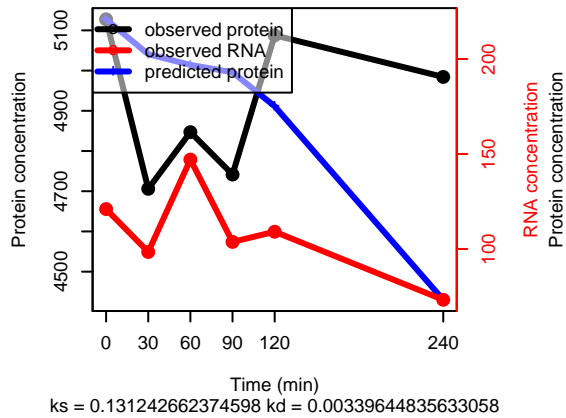

SNF4

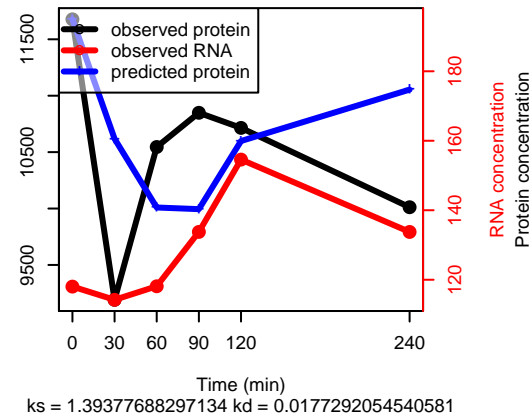

MPE1

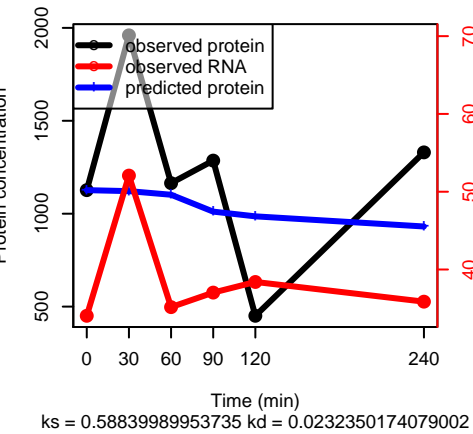

SPT5

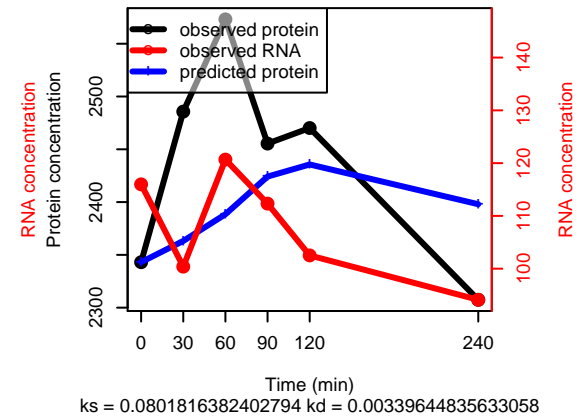

YTA12

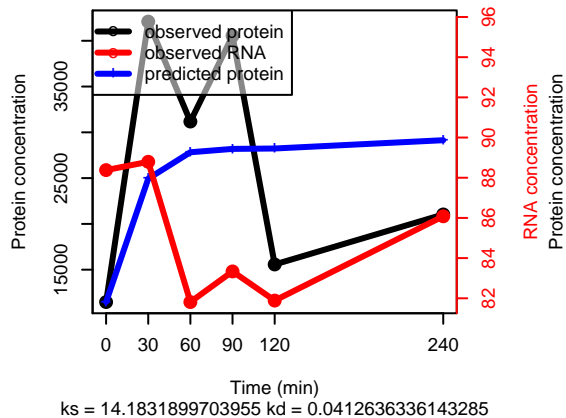

RPS16A

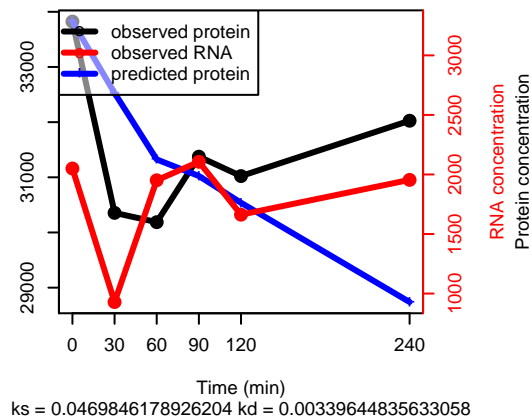

ELP4

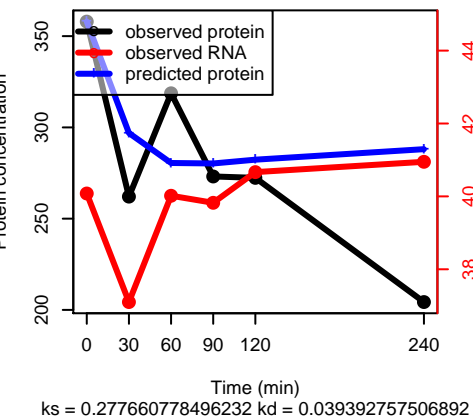

NUP60

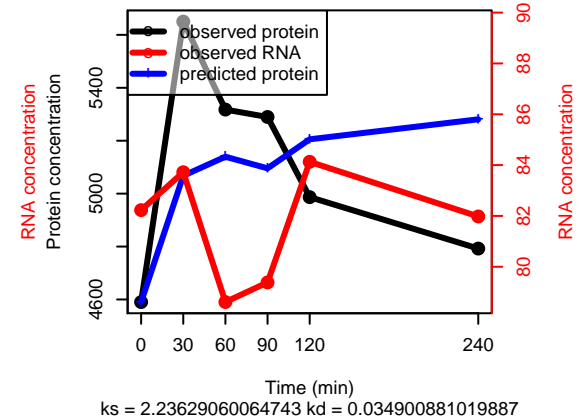

GRS1

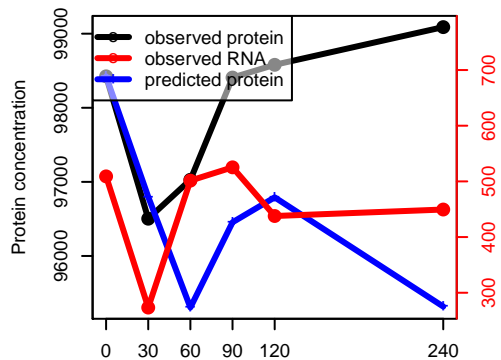

KTR3

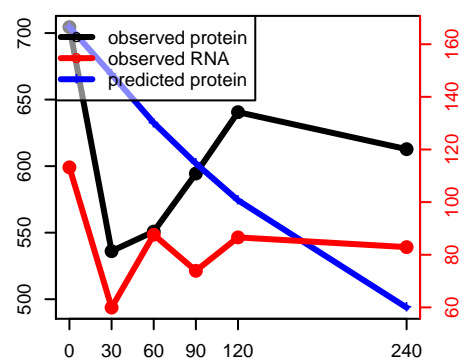

REI1

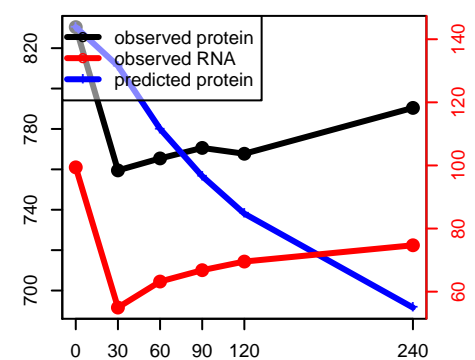

DUG2

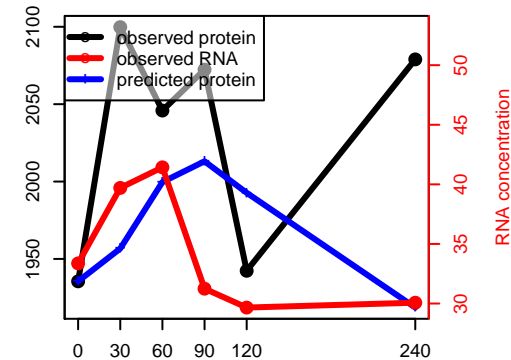

YCR087C-A

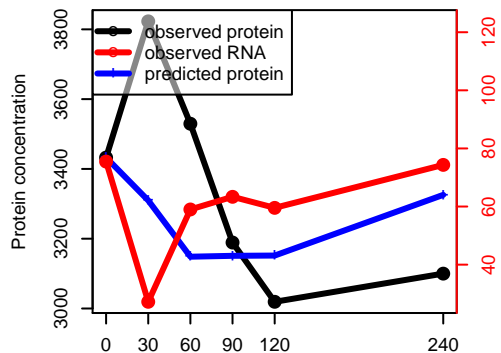

RPL13A

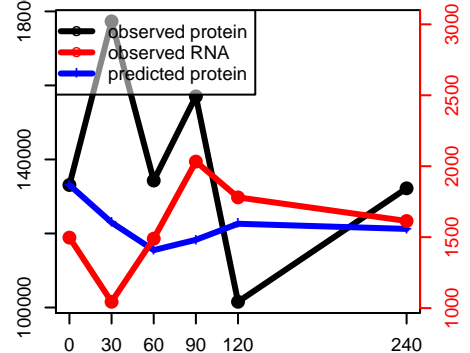

RPP1B

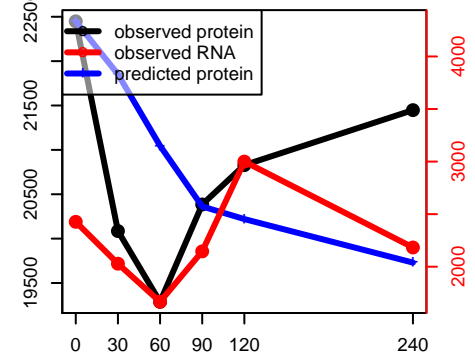

SEC53

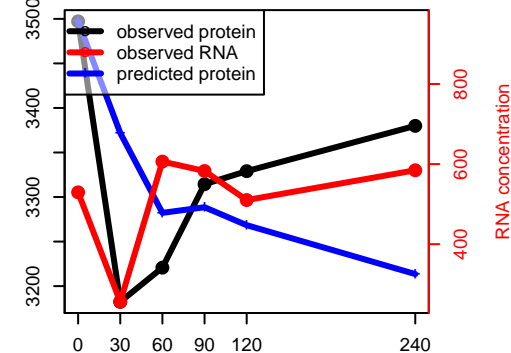

RPL9A

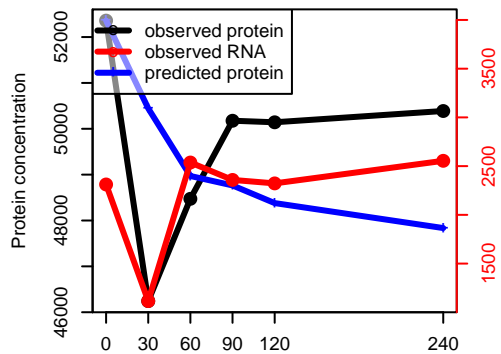

RFC2

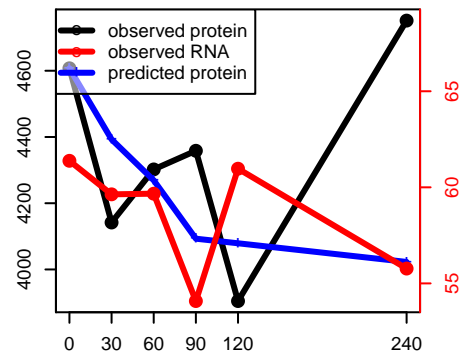

SNU114

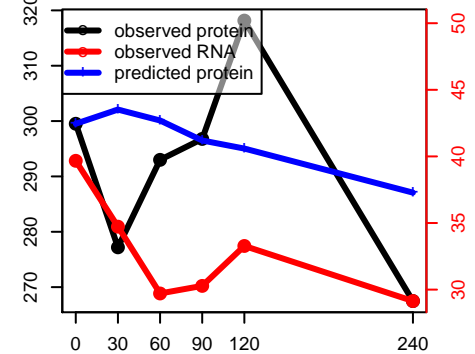

SHB17

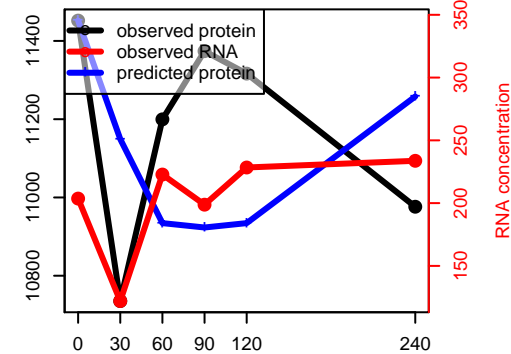



MEU1

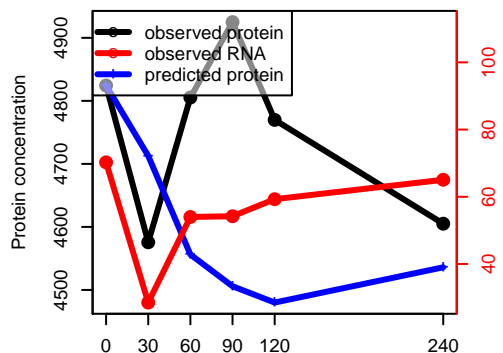

RPL22A

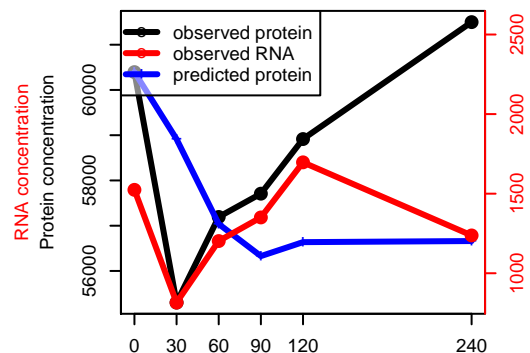

TUB4

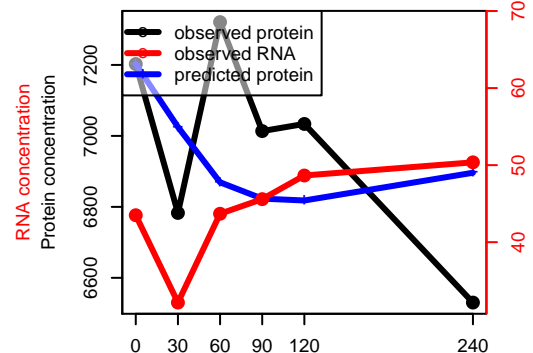

ADH3

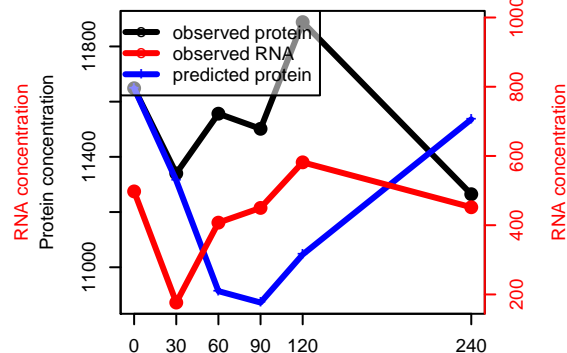

DCP2

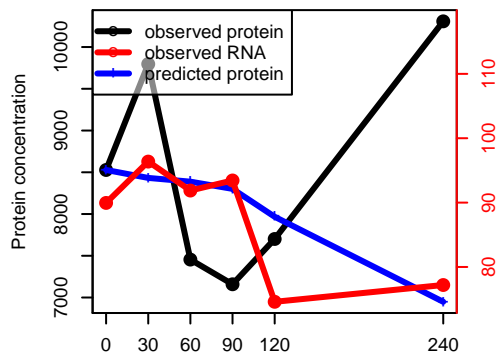

CKA2

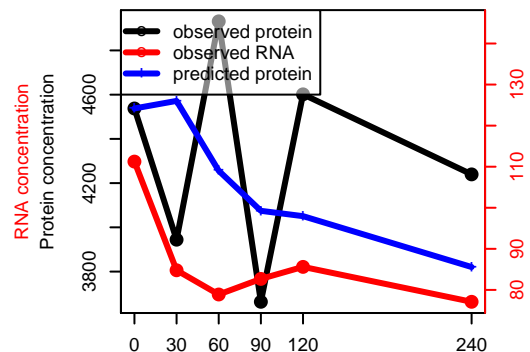

SEY1

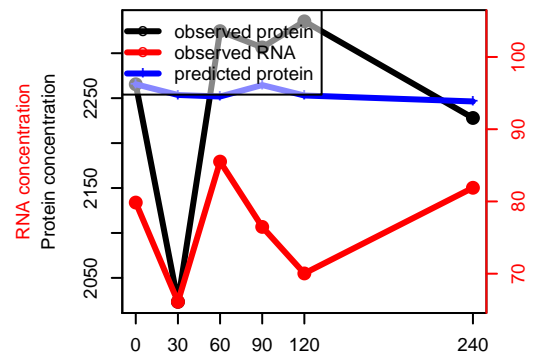

POL12

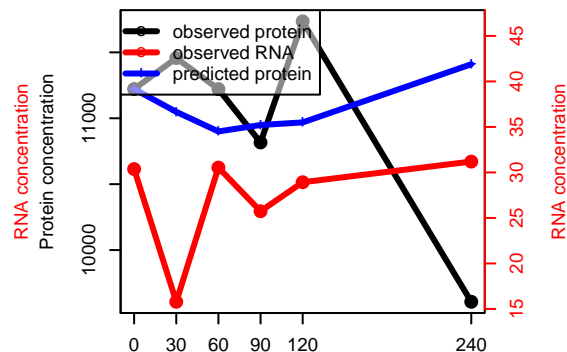

EMC1

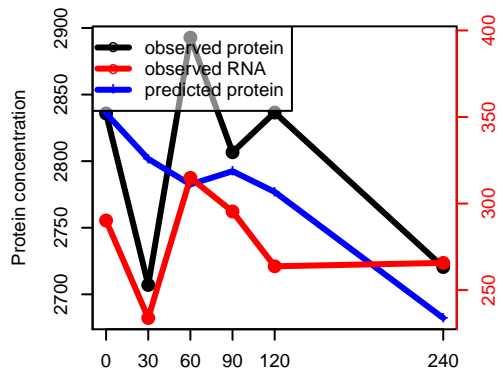

SUB2

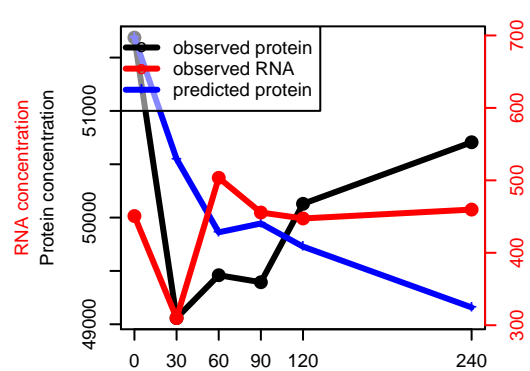

MSH6

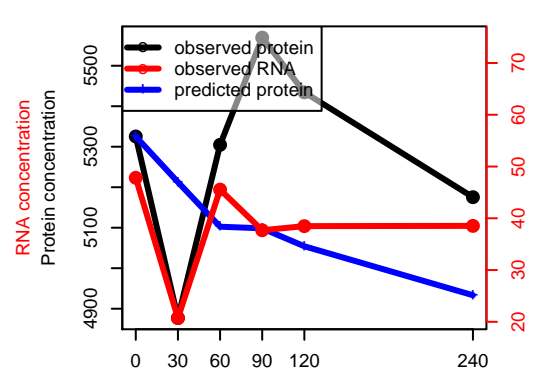

LSM4

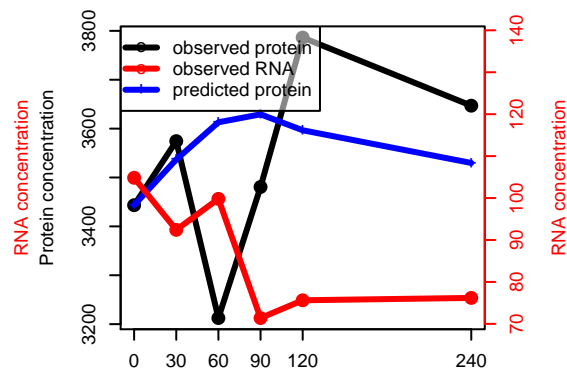

**TYW3**

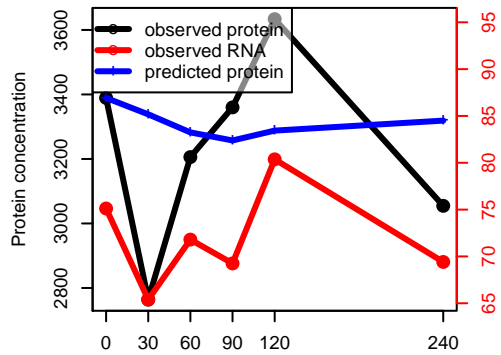

Time (min)  
ks = 0.402877288209506 kd = 0.00890349986308249

**RPL7A**

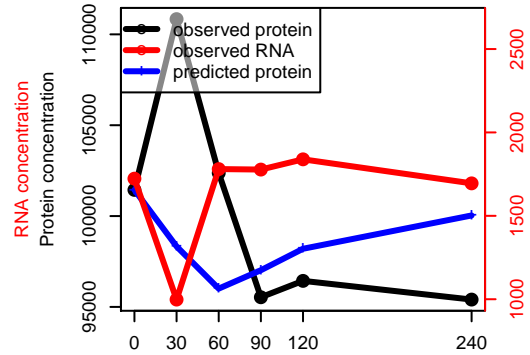

Time (min)  
ks = 0.281038994777132 kd = 0.00485195771250876

**RBG2**

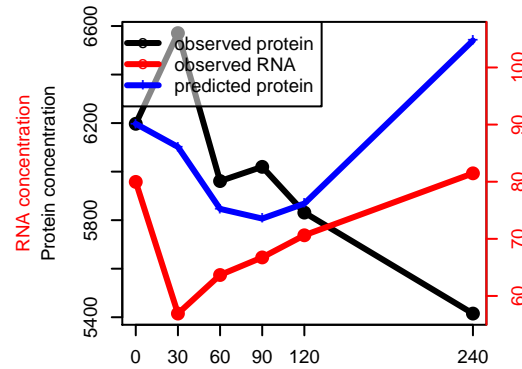

Time (min)  
ks = 1.02277632794902 kd = 0.0118089647762336

**SFB3**

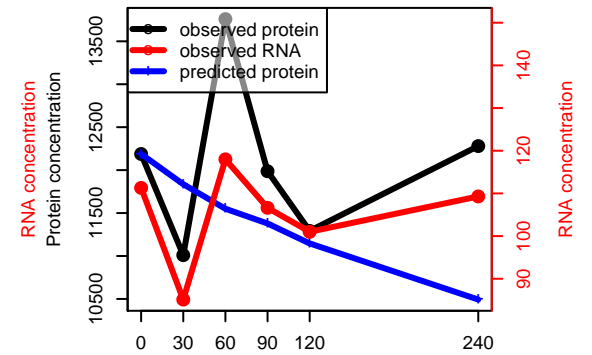

Time (min)  
ks = 0.296455845289546 kd = 0.00339644835633058

**SGD1**

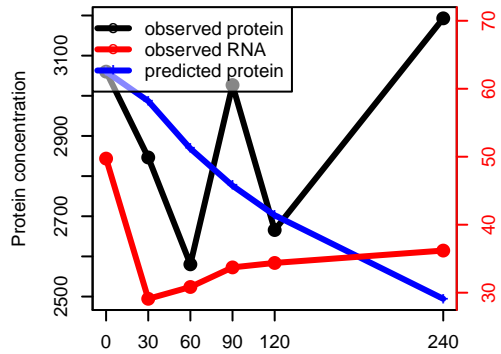

Time (min)  
ks = 0.200000572645579 kd = 0.00339644835633058

**NPL6**

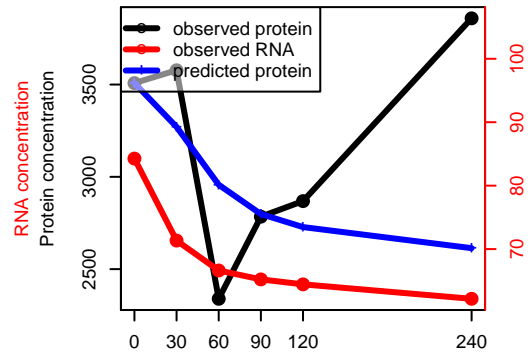

Time (min)  
ks = 2.14392677324952 kd = 0.0509948561758691

**DOM34**

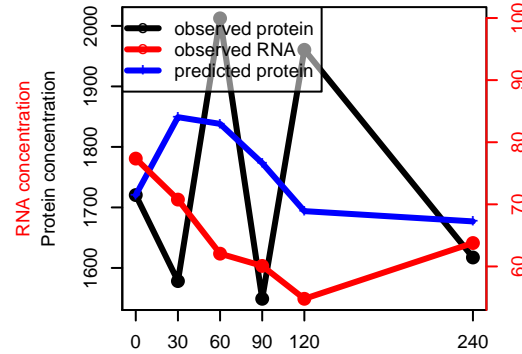

Time (min)  
ks = 0.487548573070853 kd = 0.0177059147783845

**THI80**

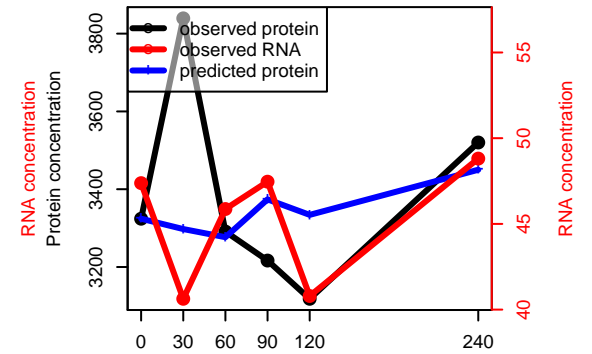

Time (min)  
ks = 1.51765203538164 kd = 0.0203023918267124

**TIM50**

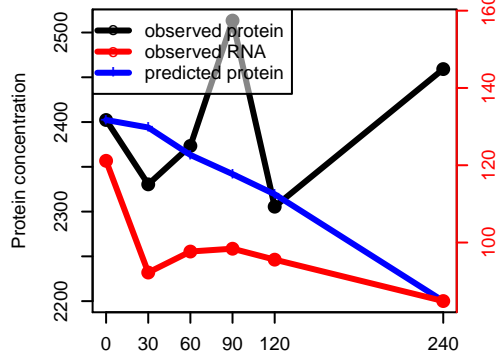

Time (min)  
ks = 0.074354037073839 kd = 0.00339644835633058

**NOG1**

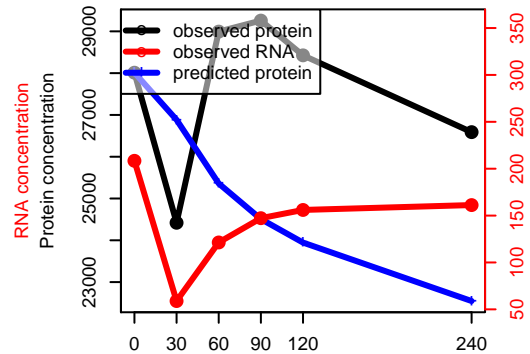

Time (min)  
ks = 0.41781954887584 kd = 0.00339644835633058

**RBA50**

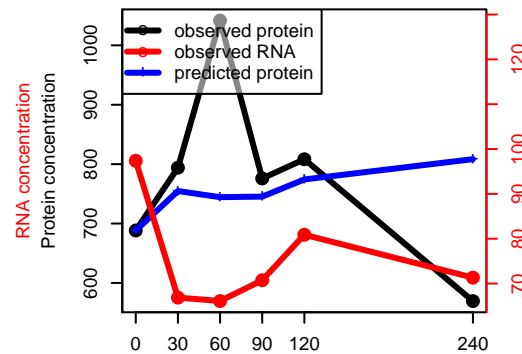

Time (min)  
ks = 0.150135977283871 kd = 0.0137742799717783

**UTP22**

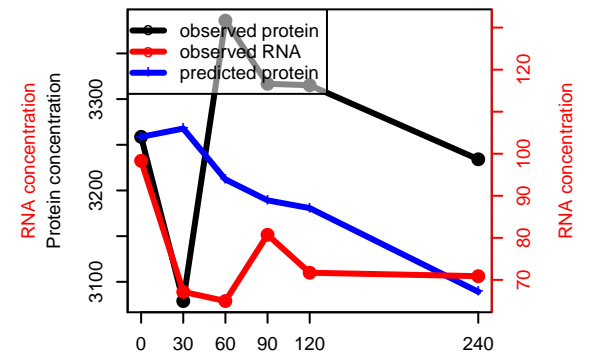

Time (min)  
ks = 0.138081013182705 kd = 0.00339644835633058

ERG13

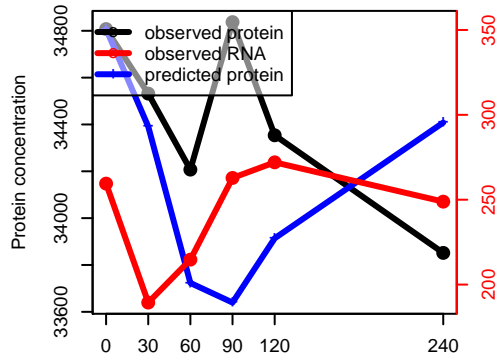

RPC82

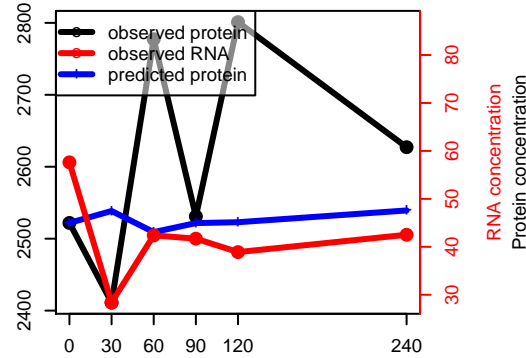

SXM1

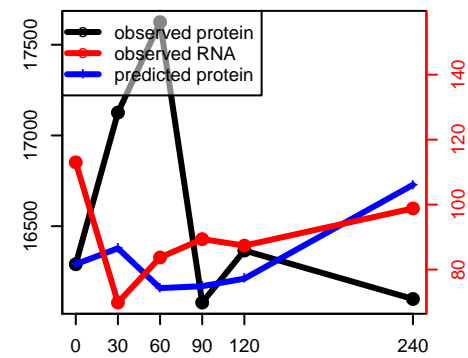

PRO3

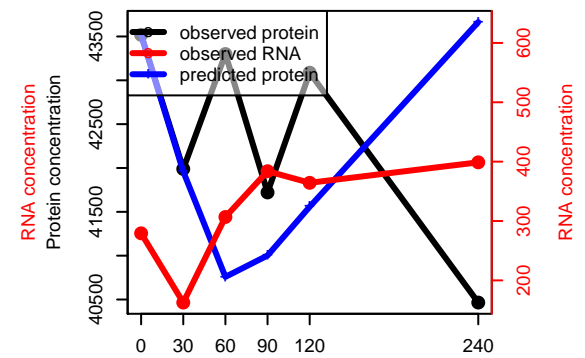

GCN1

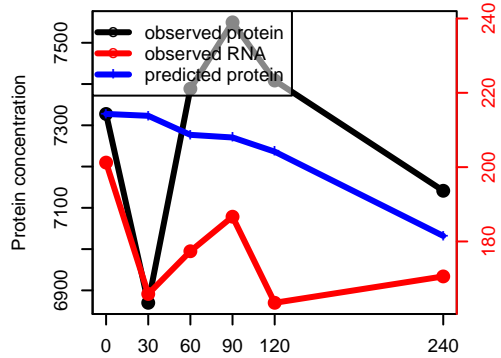

MYO1

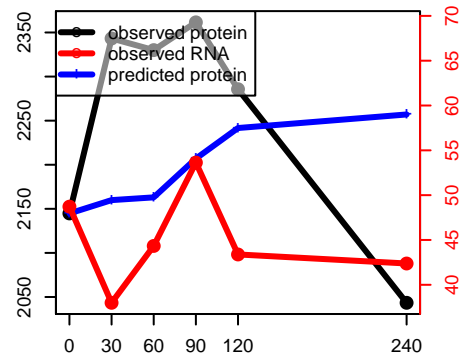

SMC3

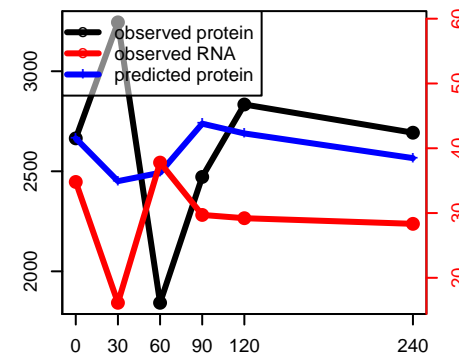

YRA2

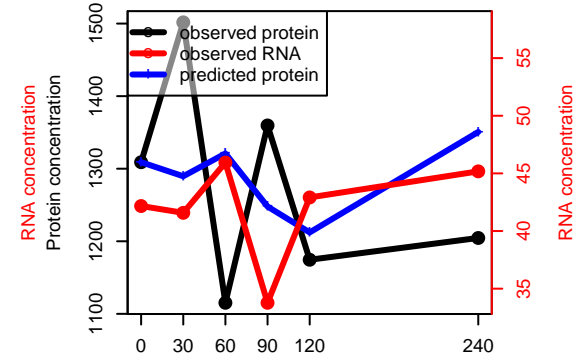

AIM29

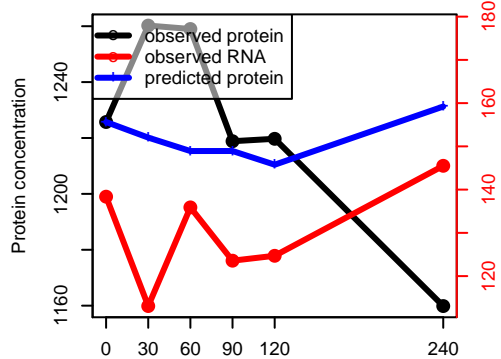

MCM5

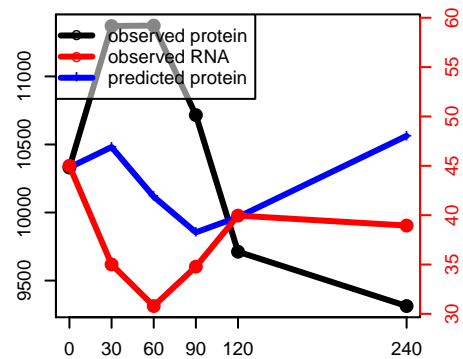

SST2

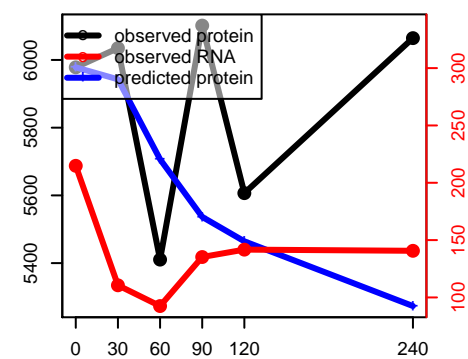

GAS3

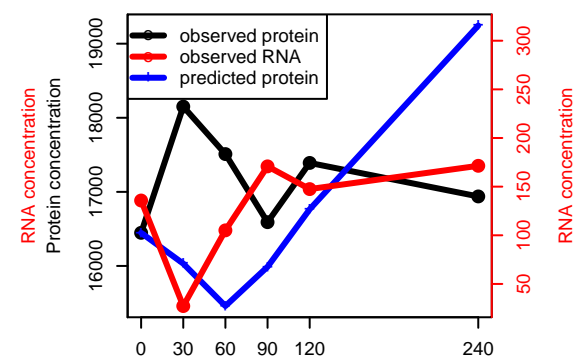

PSY2

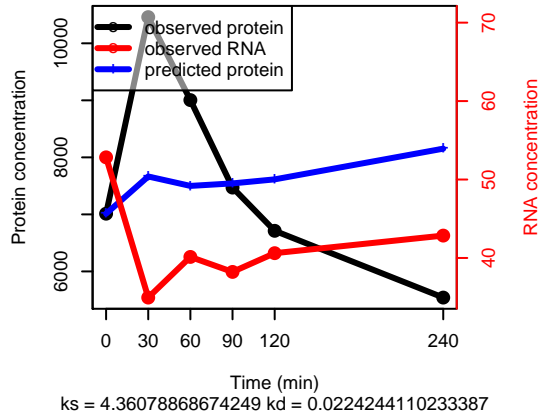

DCP1

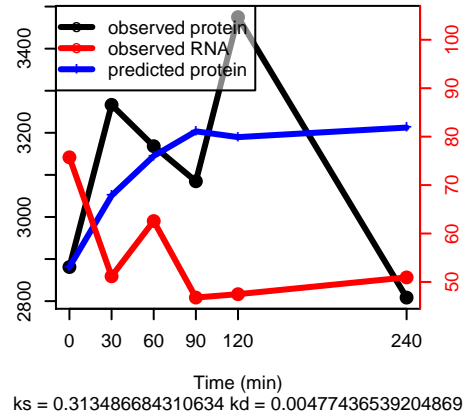

CHS3

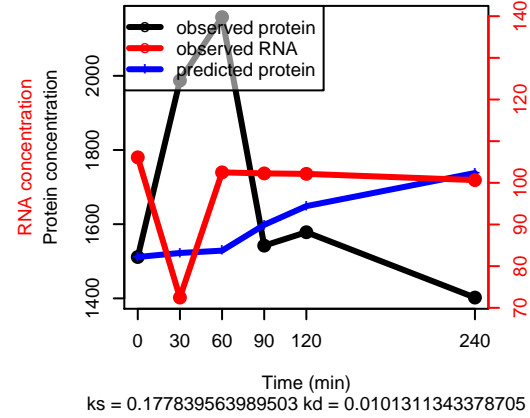

BPL1

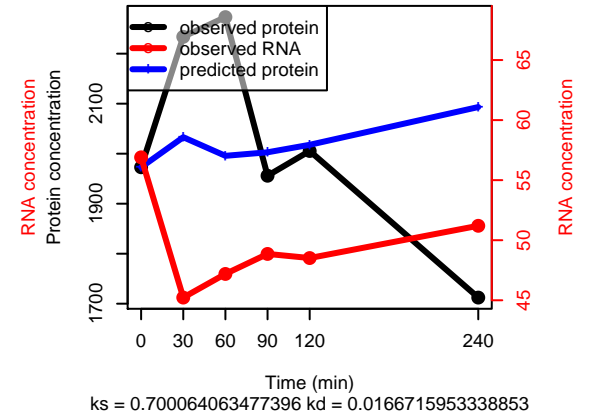

SPF1

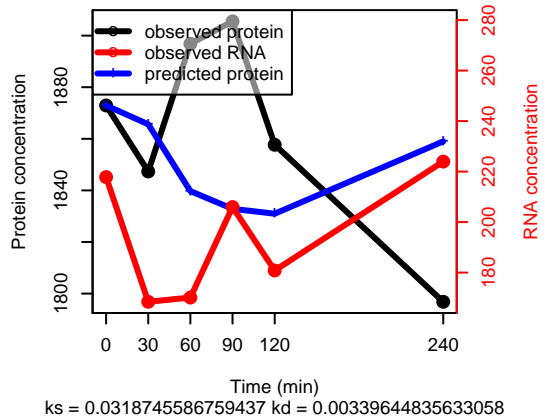

DSK2

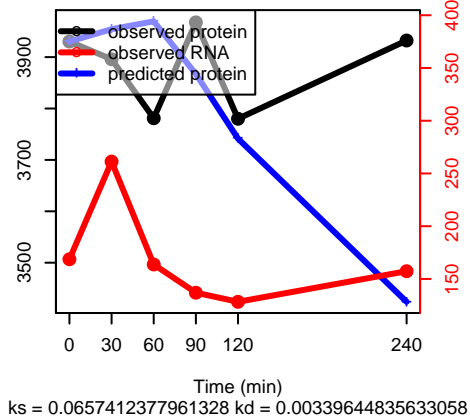

PMT3

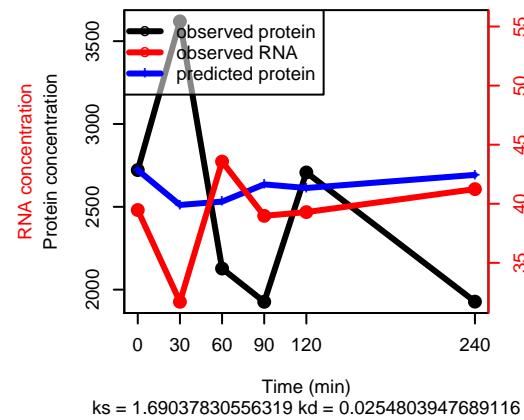

CHO2

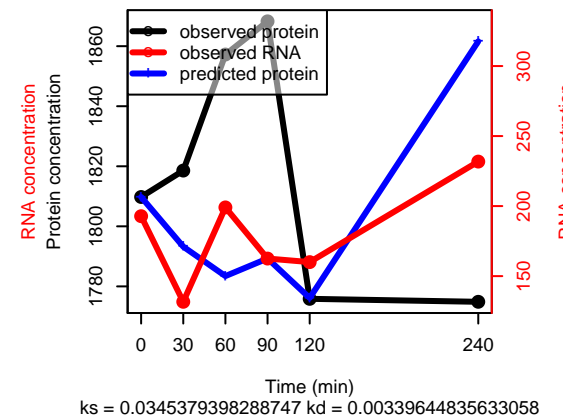

TYS1

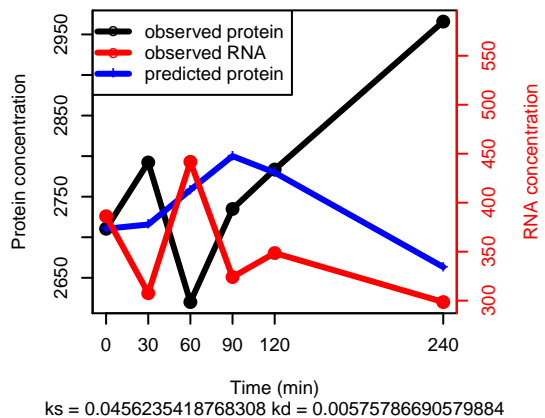

RPL14B

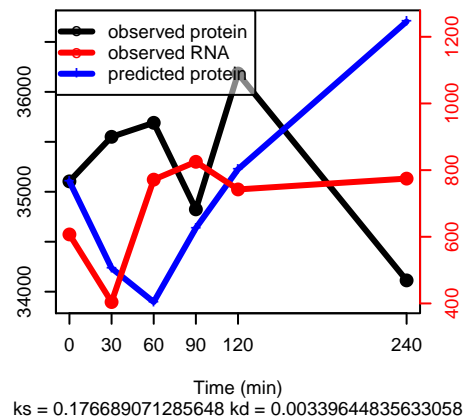

CDC12

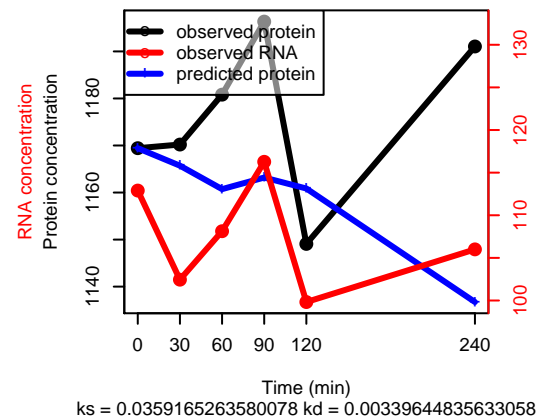

UTP9

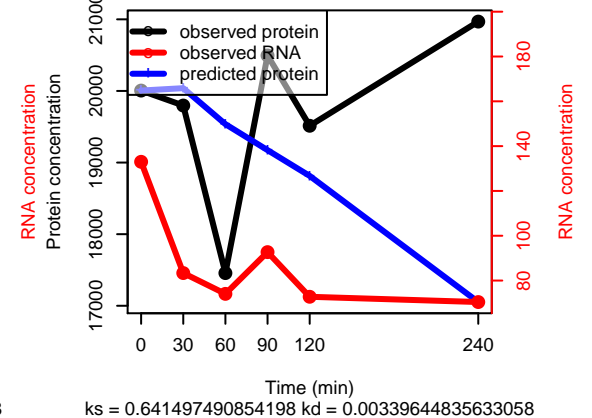

SWI3

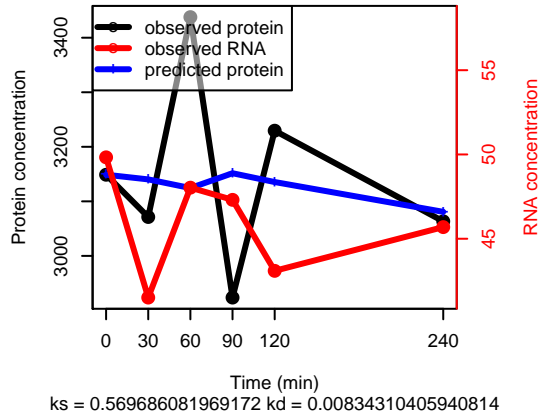

WHI3

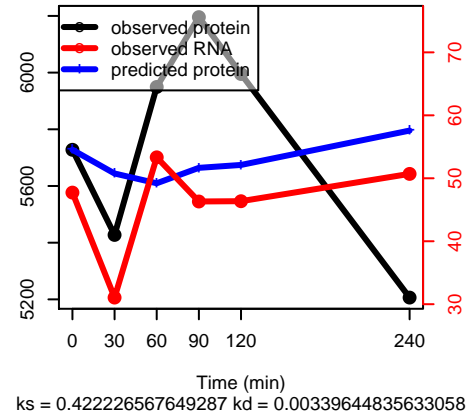

BOI1

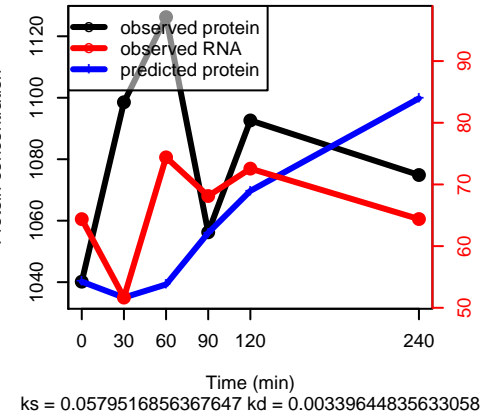

GPI16

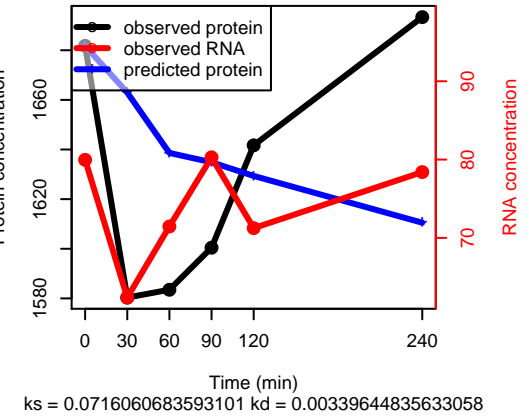

SFH5

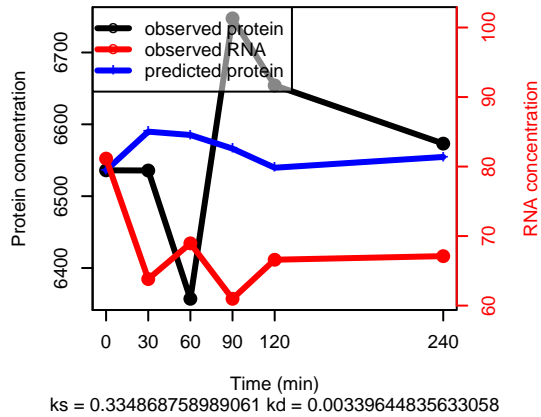

PNP1

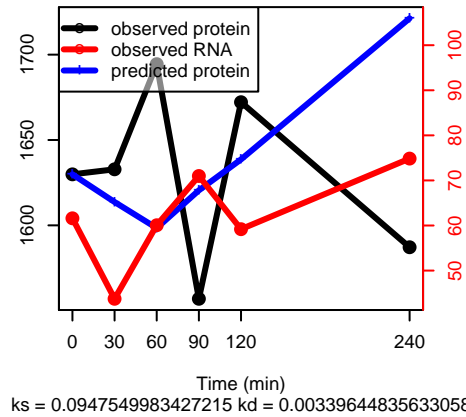

RPL15B

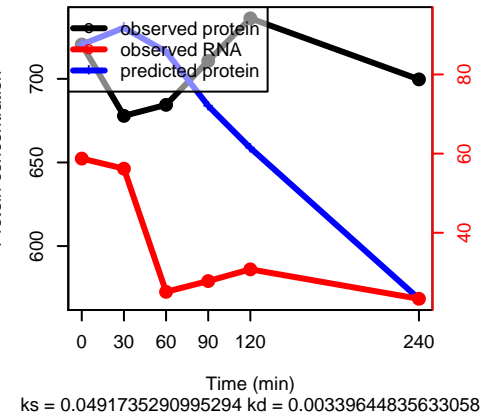

RNA1

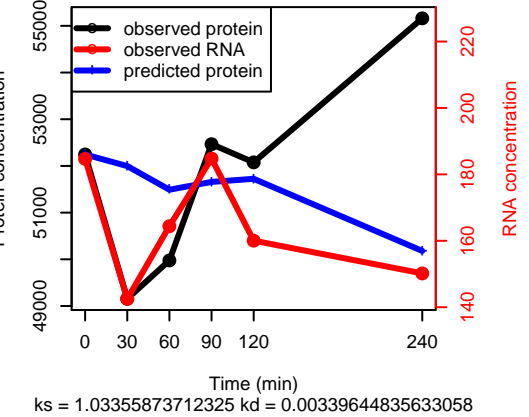

CWH41

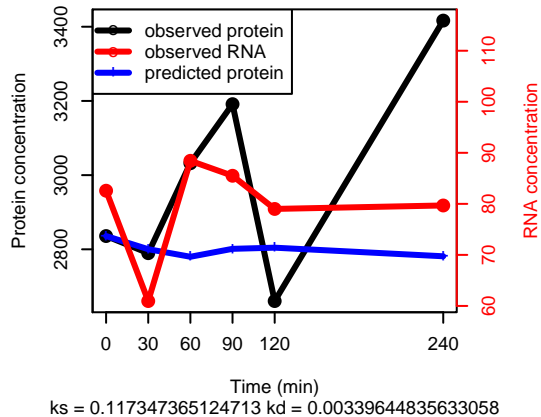

MNN11

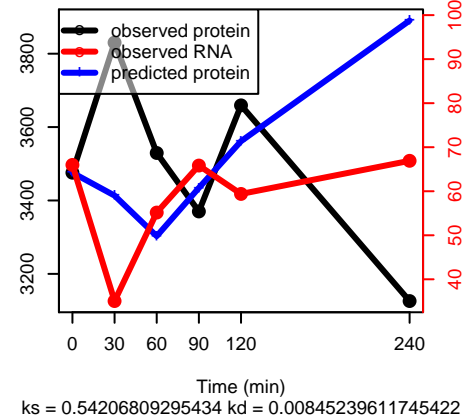

YKL027W

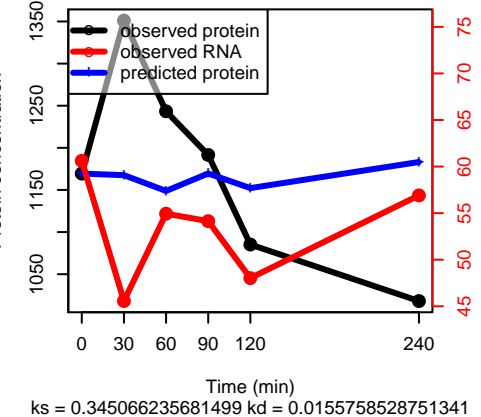

NDC1

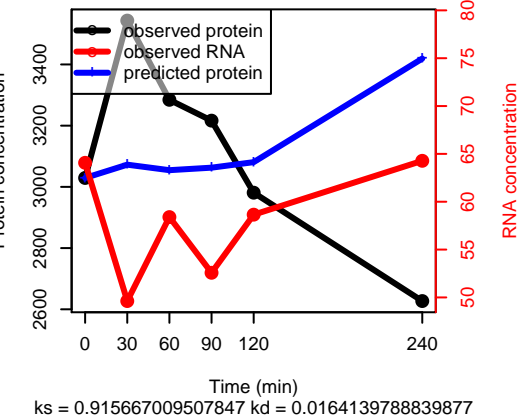

RPO26

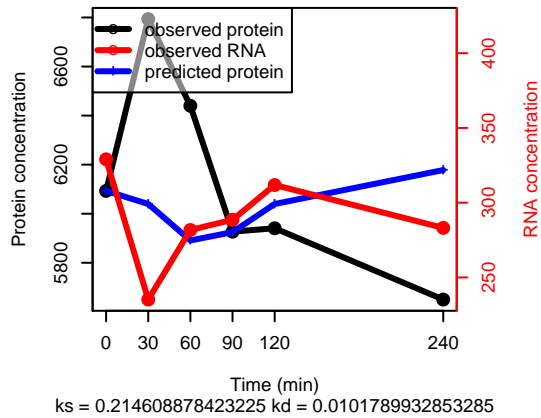

NUP170

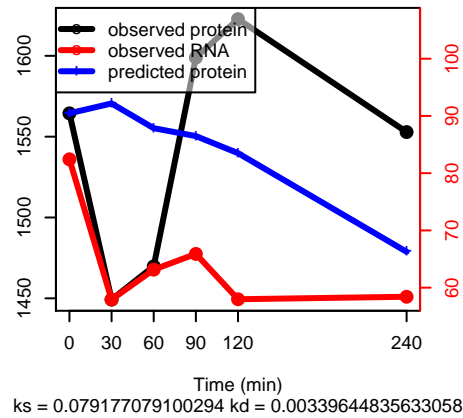

EFM1

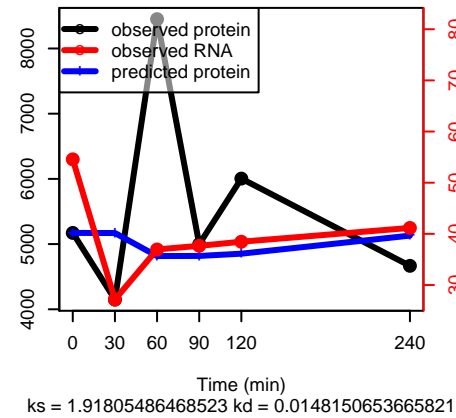

FEN1

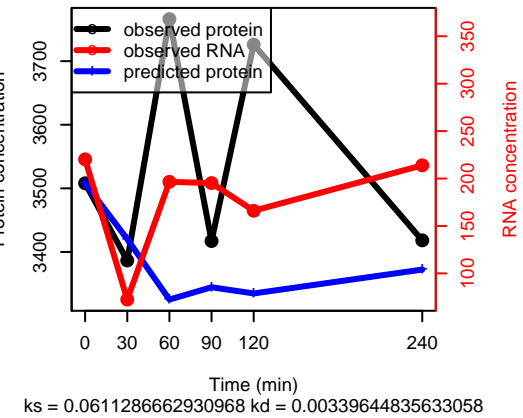

ALD5

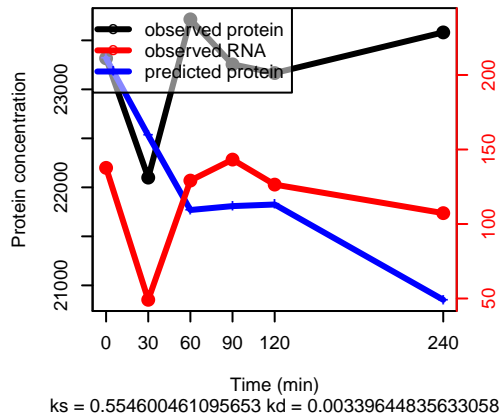

EMP24

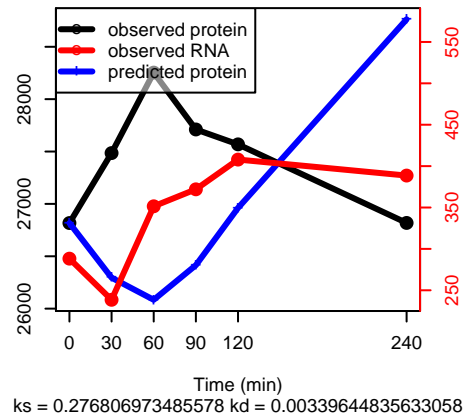

SUI2

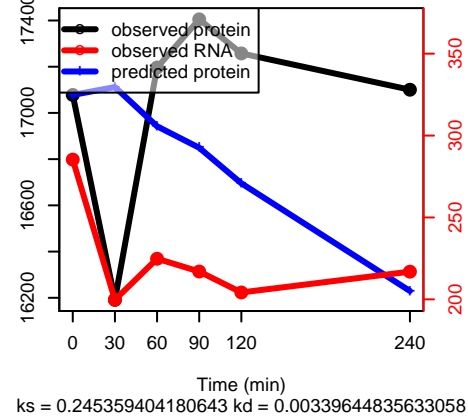

NUP133

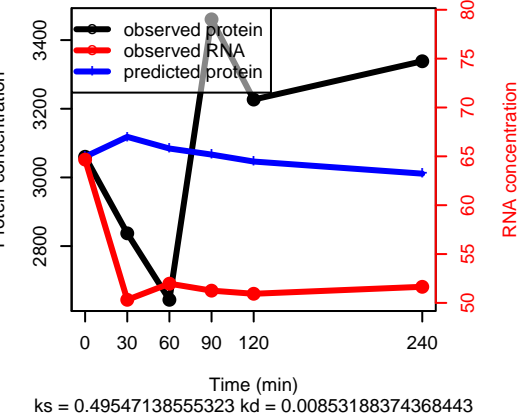

HRI1

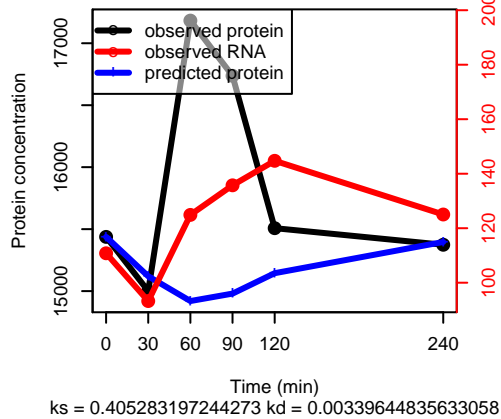

GCV2

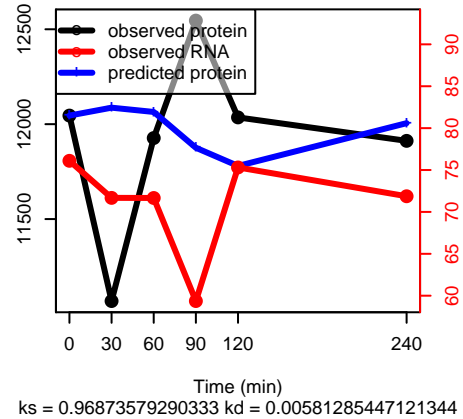

LCB1

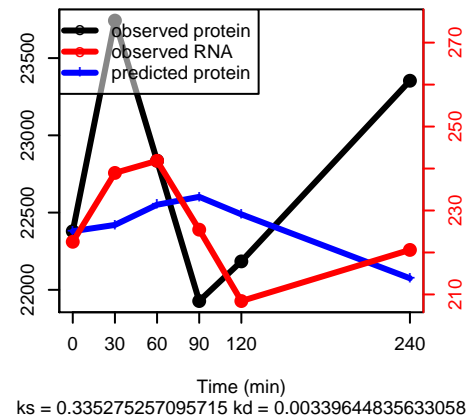

LYS4

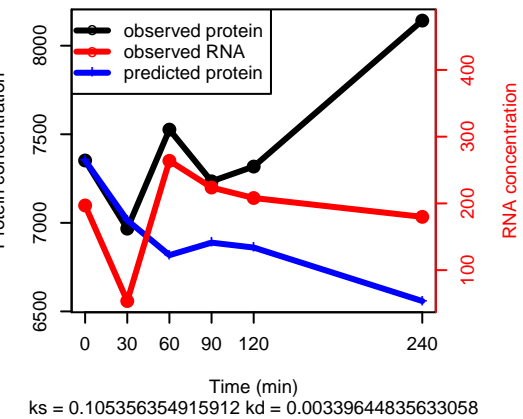



OST1

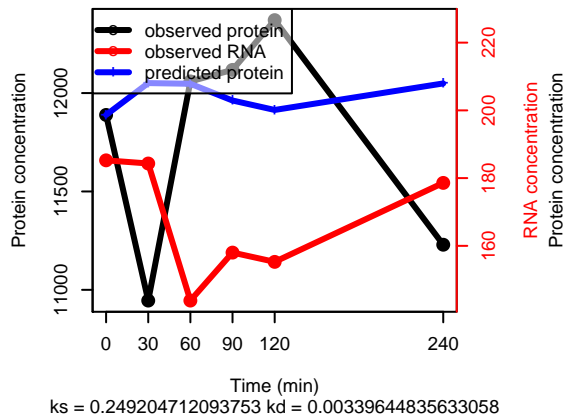

HEK2

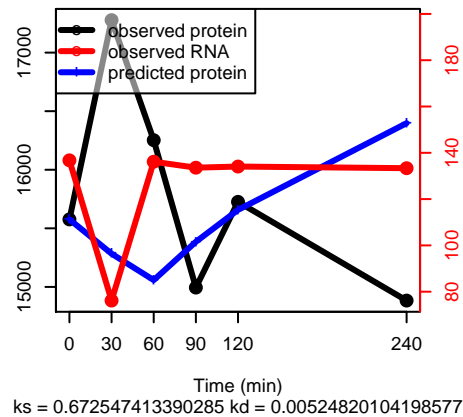

SMC4

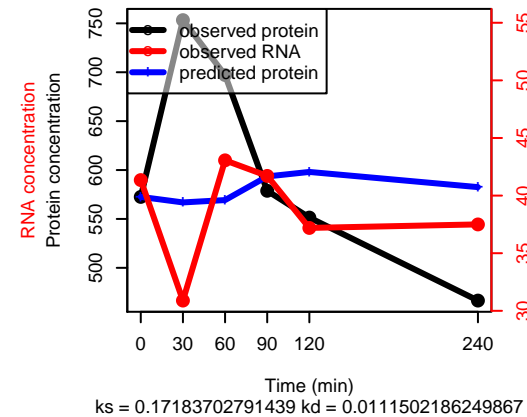

APL5

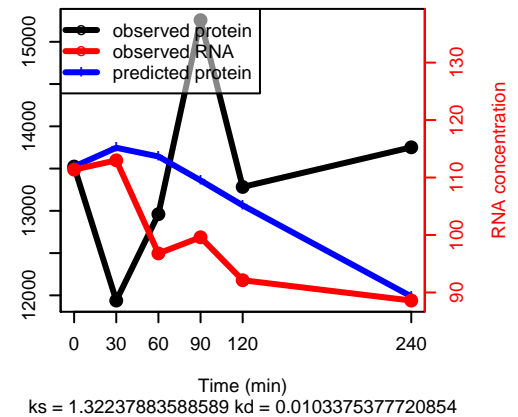

TIF5

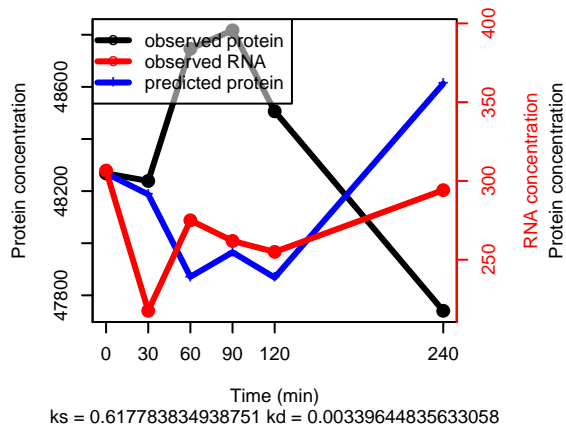

ANT1

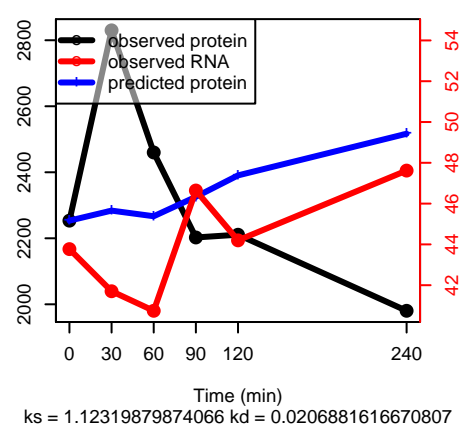

SCS2

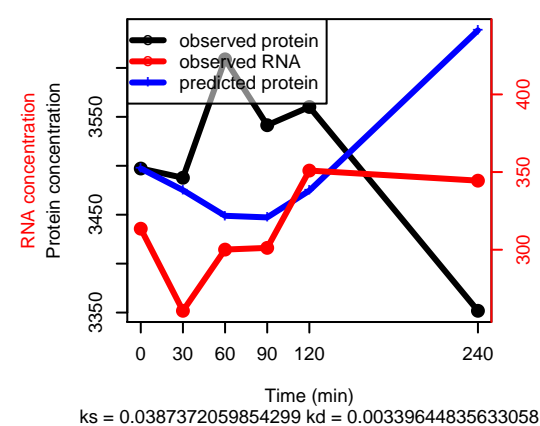

CLU1

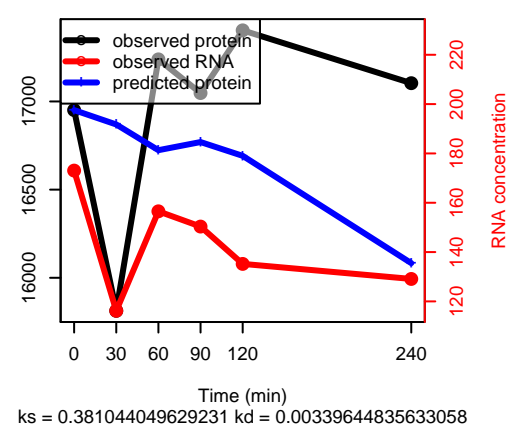

STT3

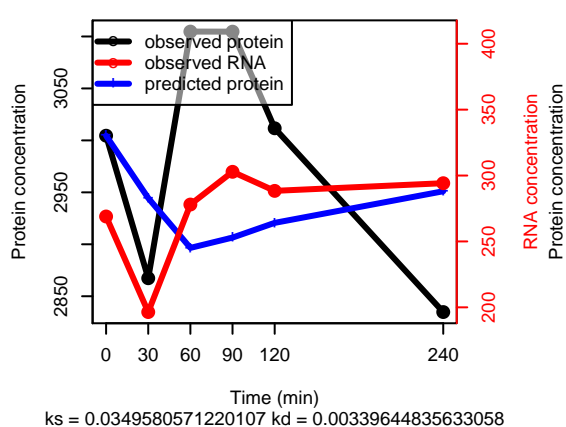

EMW1

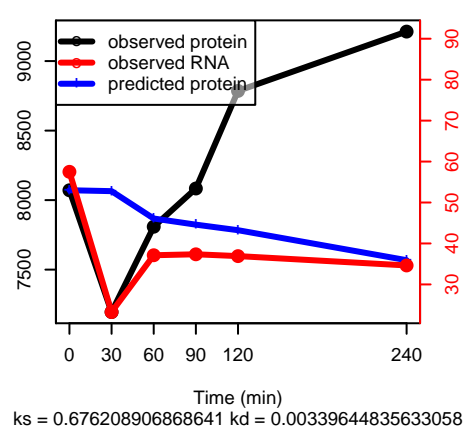

WRS1

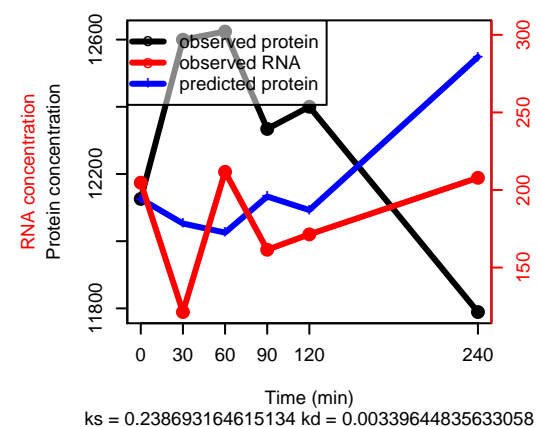

Supplement: c4mb00358f2.zip [file c4mb00358f2.zip]
