# Supplementary material for: One third of dynamic protein expression profiles can be predicted by a simple rate equation
Source: Royal Society of Chemistry journal article supplement (doi:10.1039/c4mb00358f), 2014-08-01

CAF20

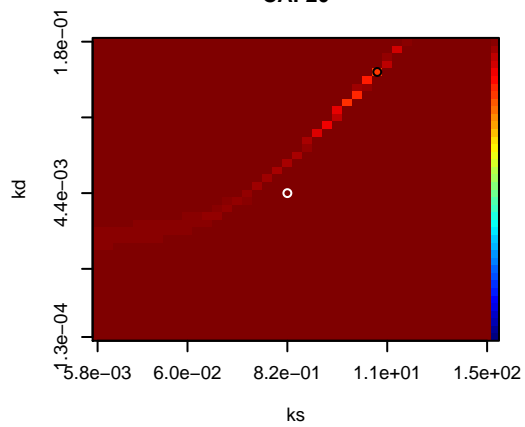

BAT2

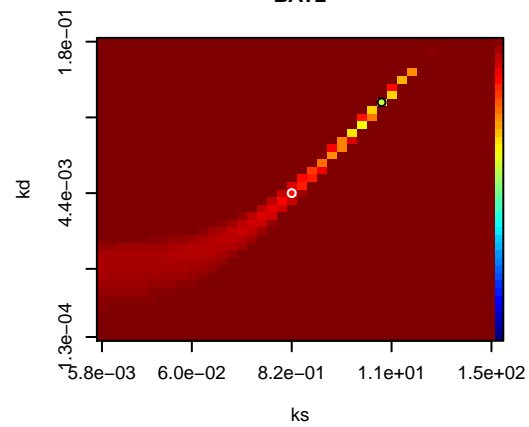

GIS2

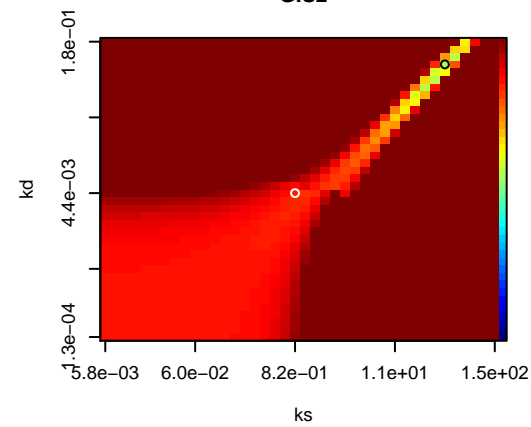

IMD1

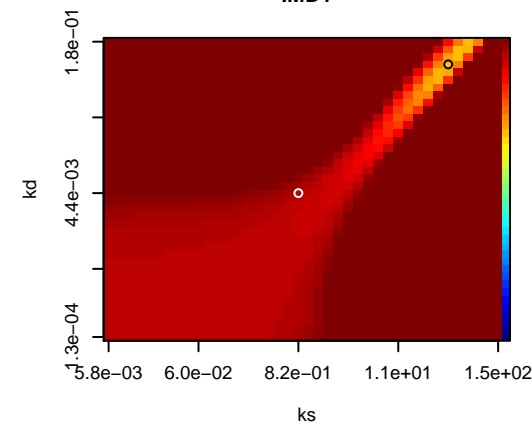

CWH41

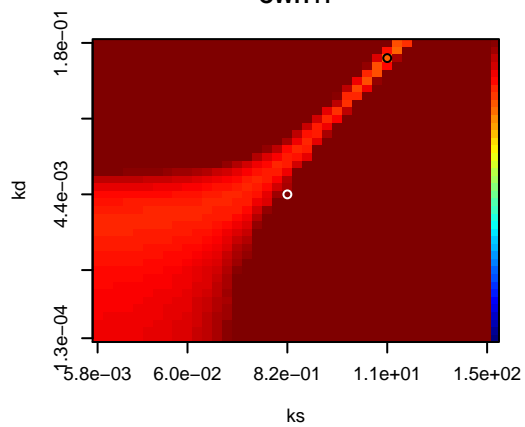

NIF3

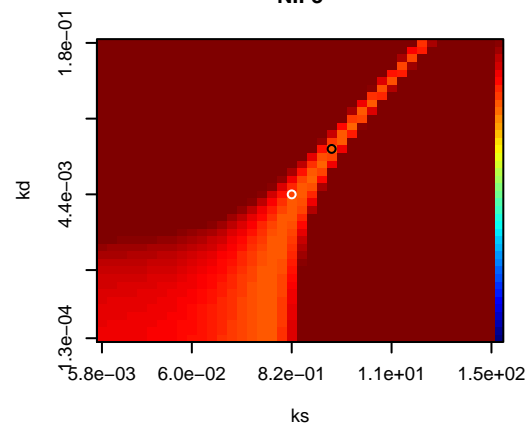

IOC4

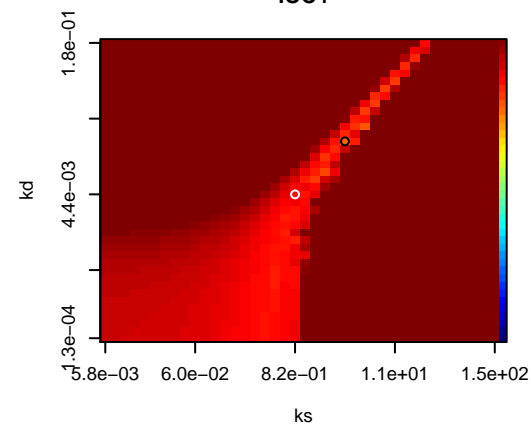

YML079W

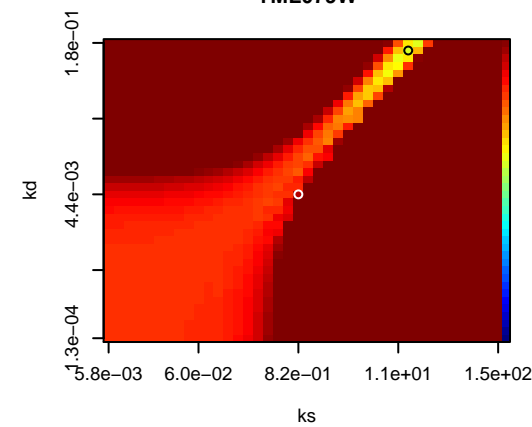

RPL13A

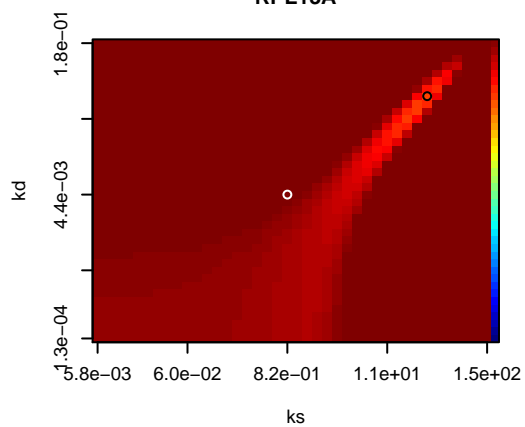

PIN3

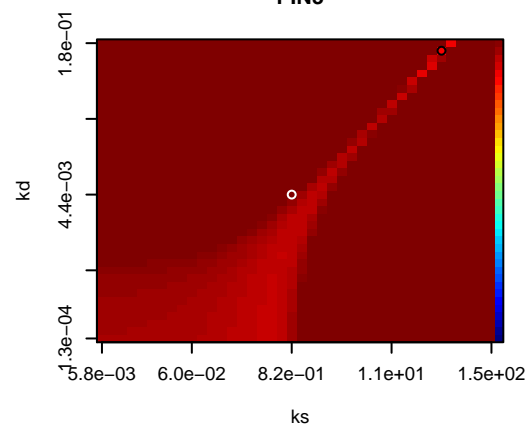

DOA4

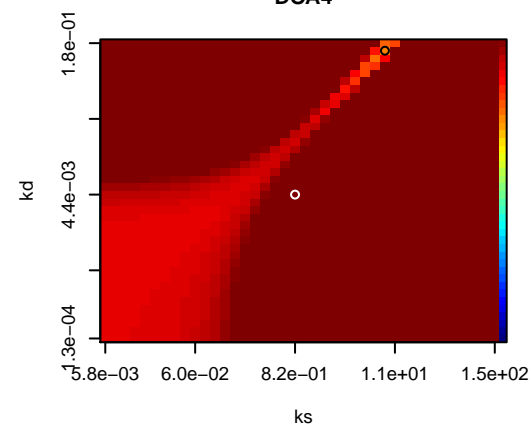

RPS20

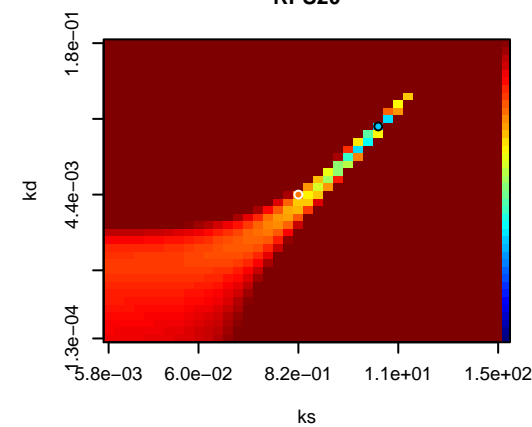

RPS31

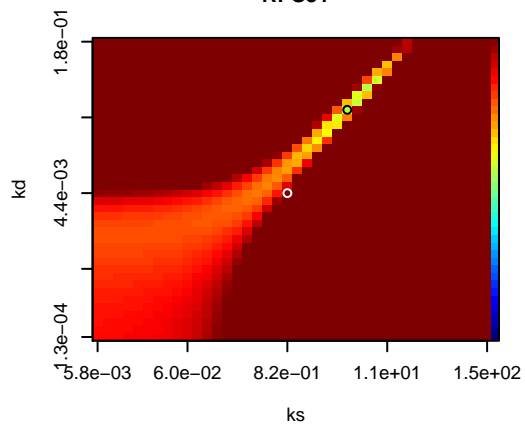

YLR179C

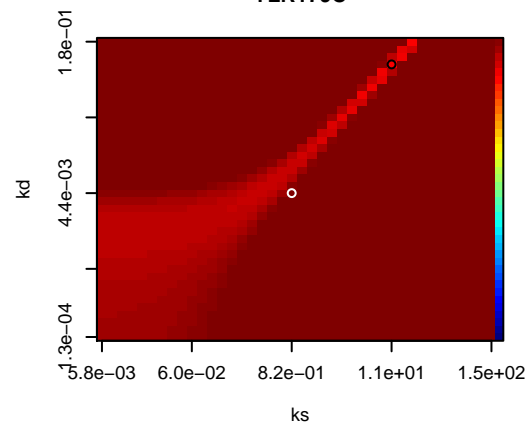

STM1

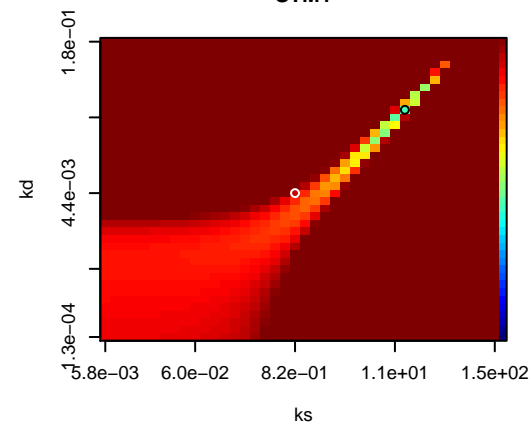

QNS1

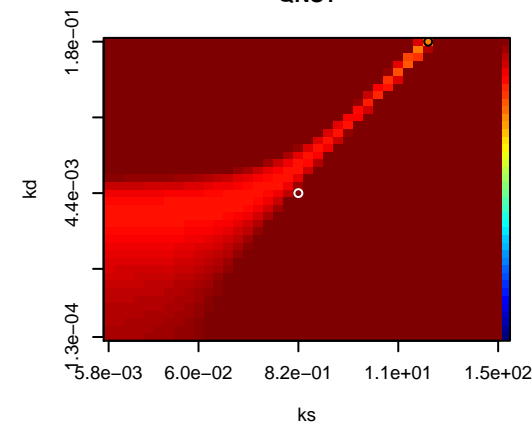

RPL26B

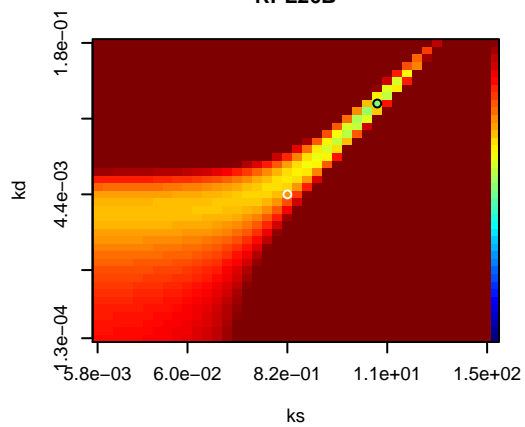

SPT4

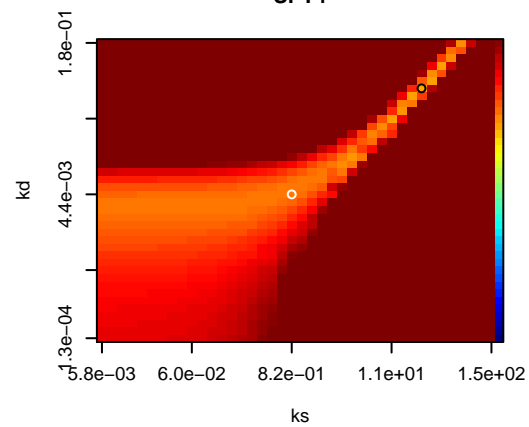

HMF1

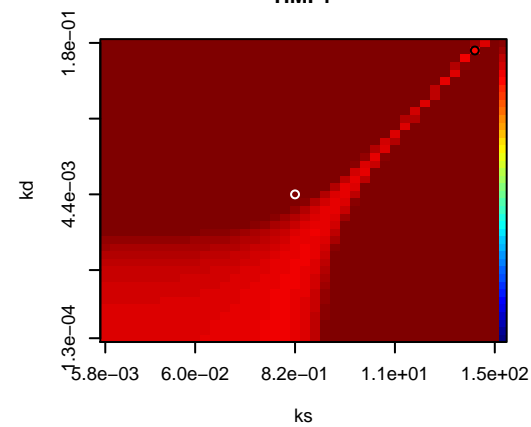

ATP16

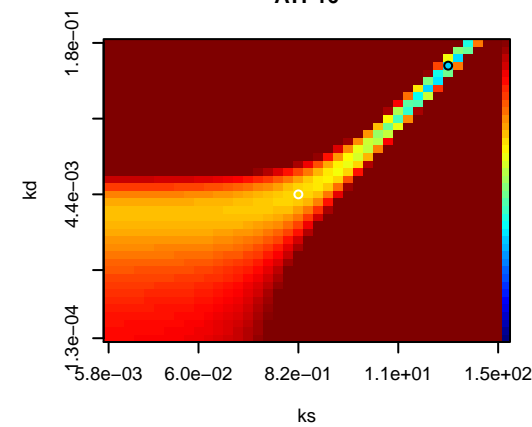

RPL36A

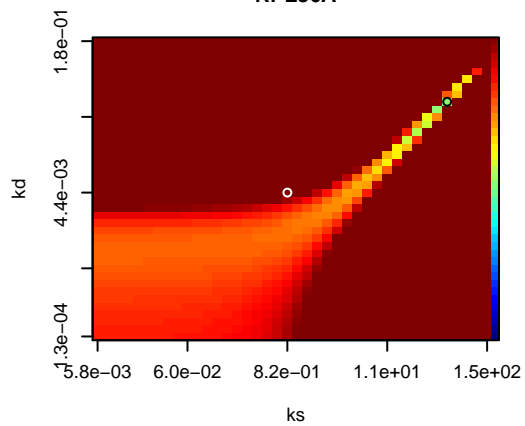

DUR1-2

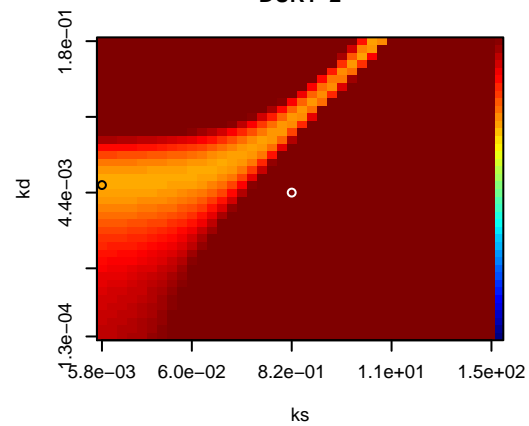

RPL28

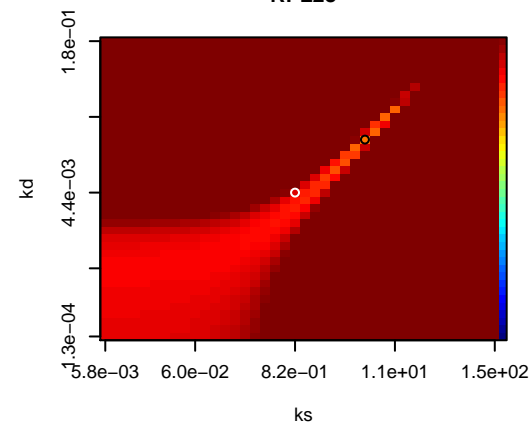

NFU1

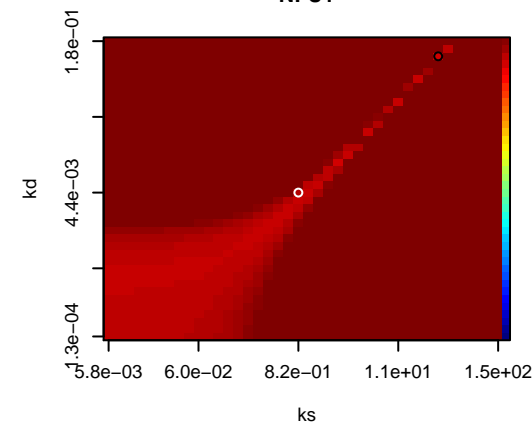

**RPE1**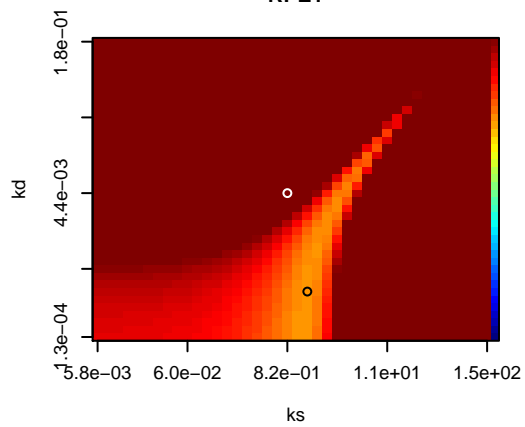**YRB2**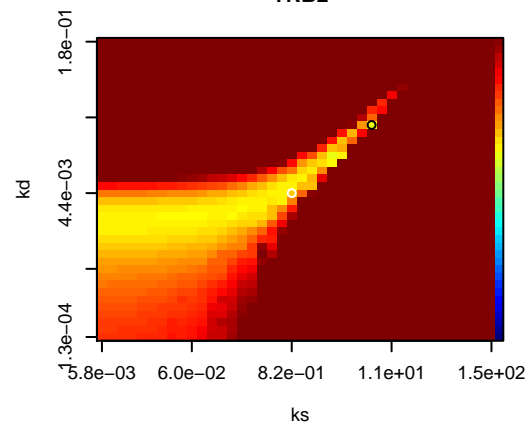**MXR1**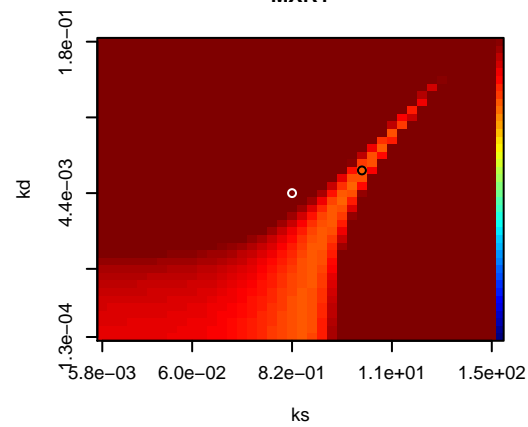**TIF6**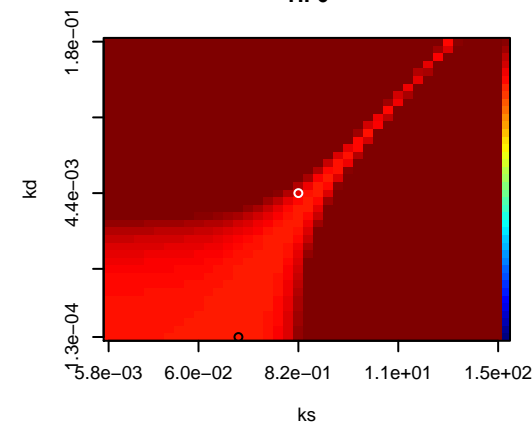**PMI40**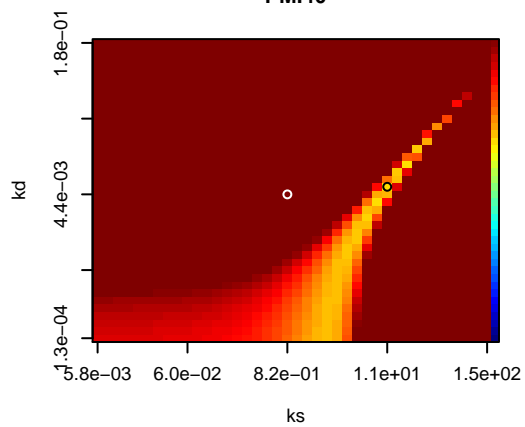**BN41**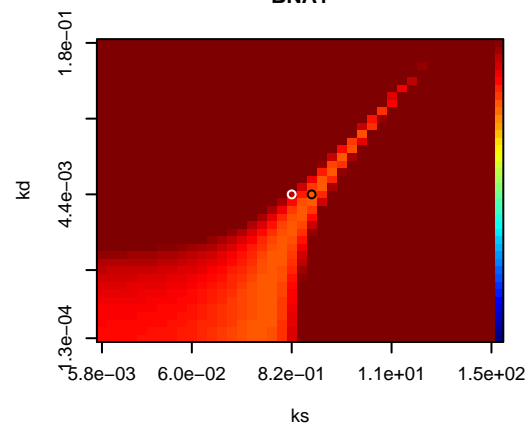**YMR099C**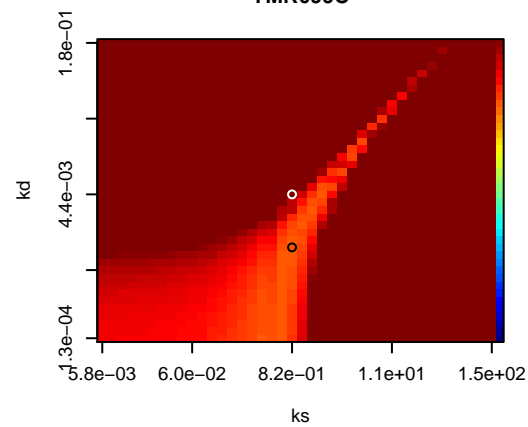**ECM29**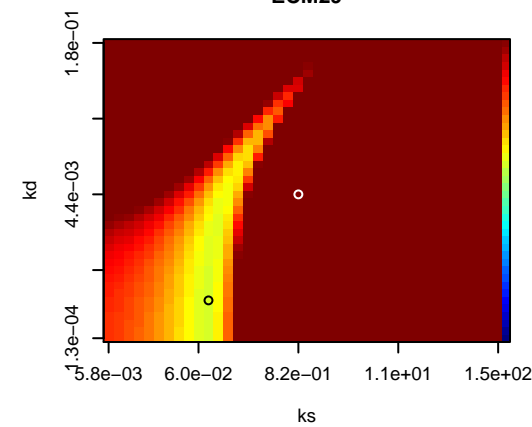**HOR2**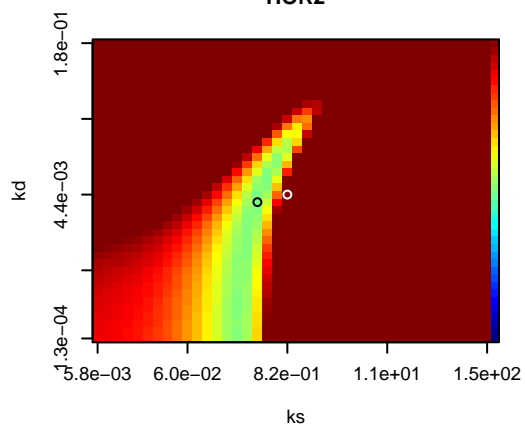**YKE2**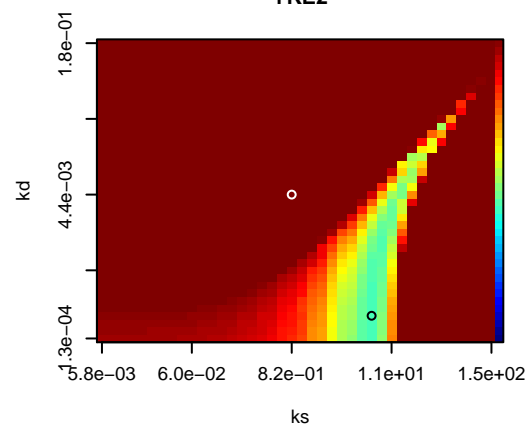**NCL1**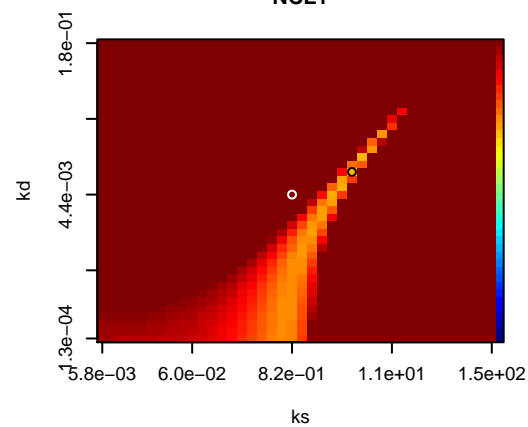**ACO1**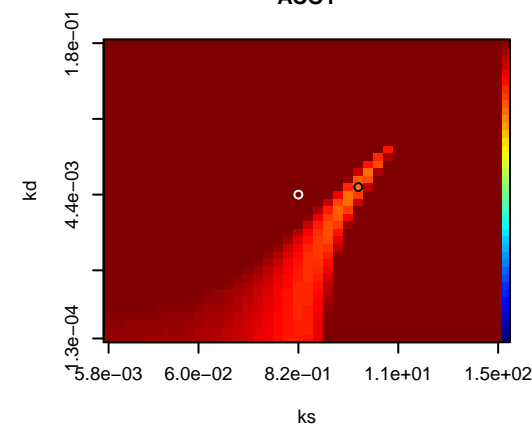

**RNR4**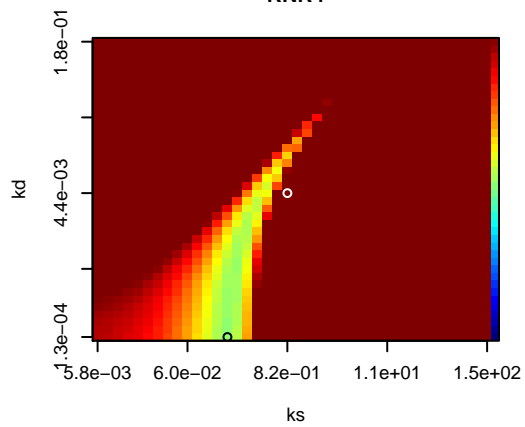**RPS30A**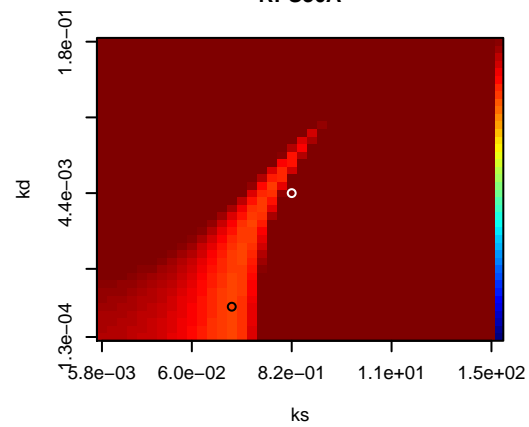**GLR1**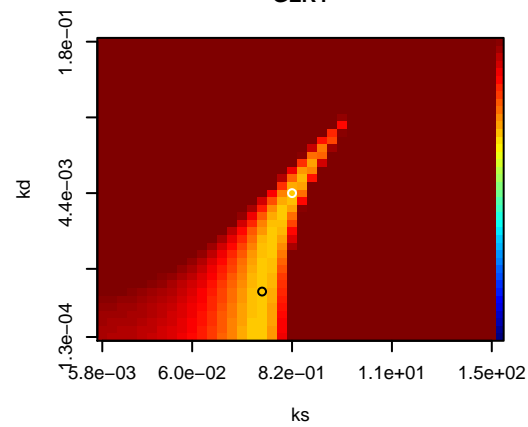**URA2**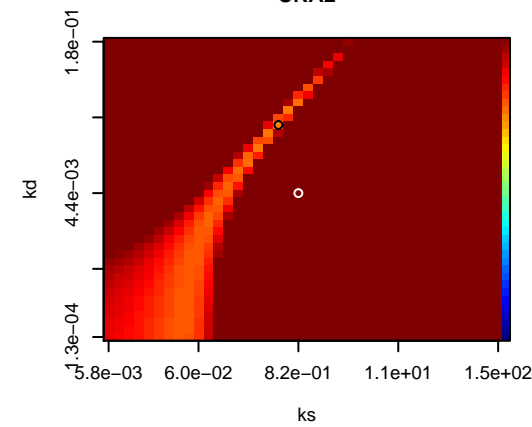**TEF4**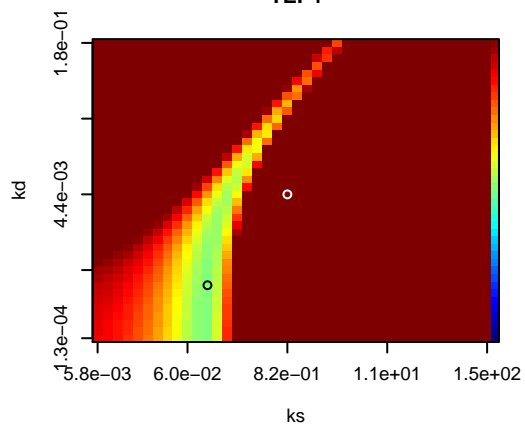**SEC13**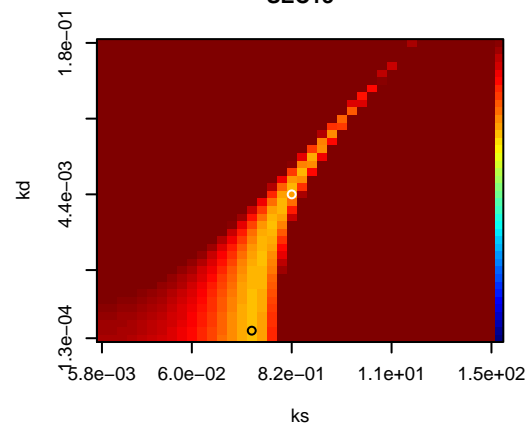**HSC82**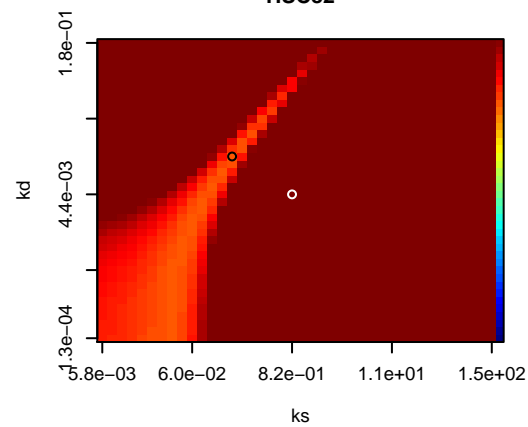**SSZ1**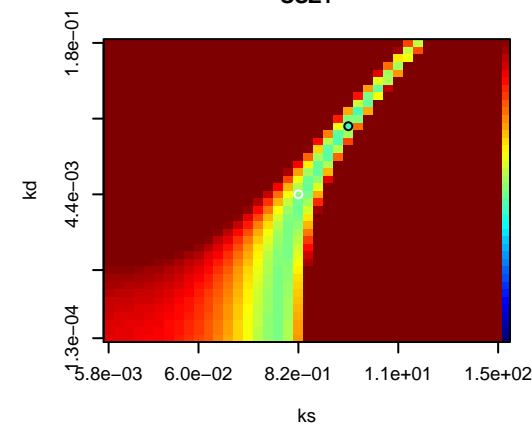**TRP2**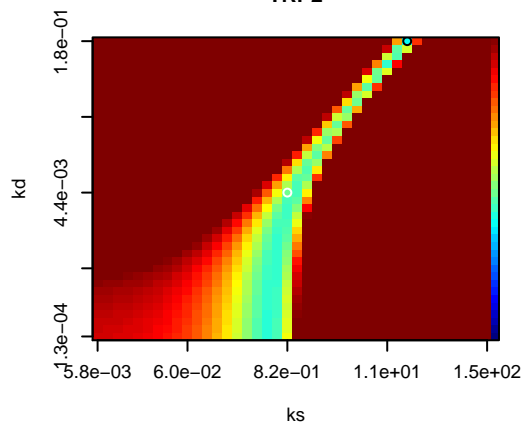**RPC19**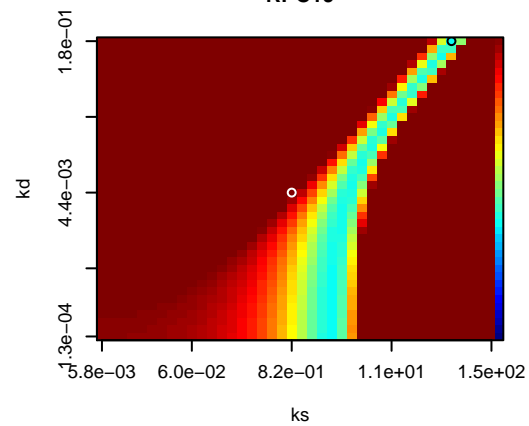**MKT1**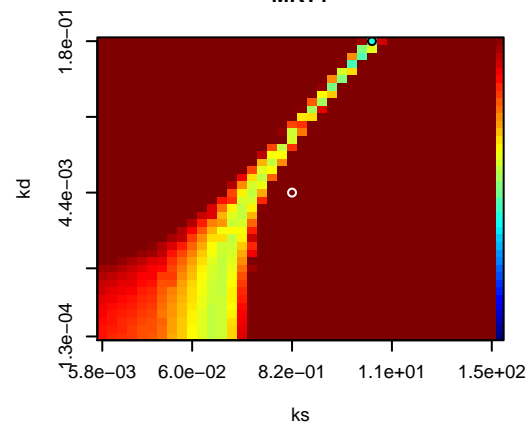**SEC16**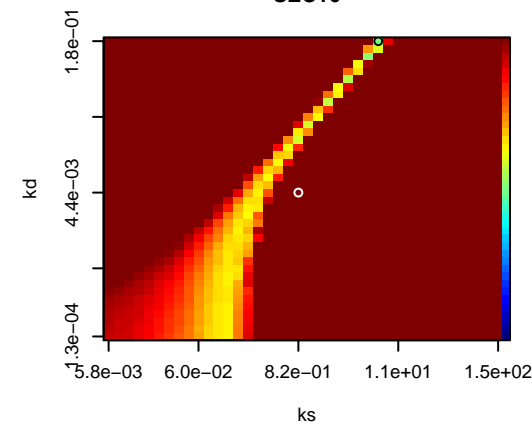

**RPL31B**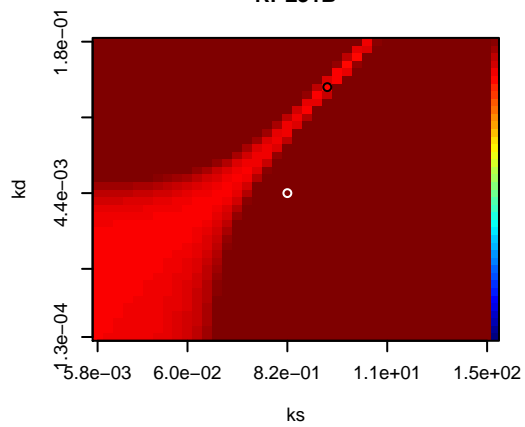**GUS1**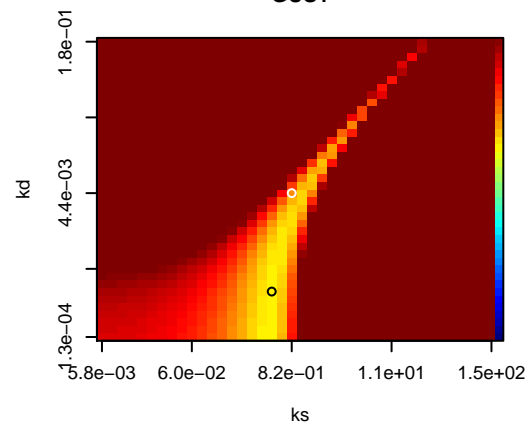**TAO3**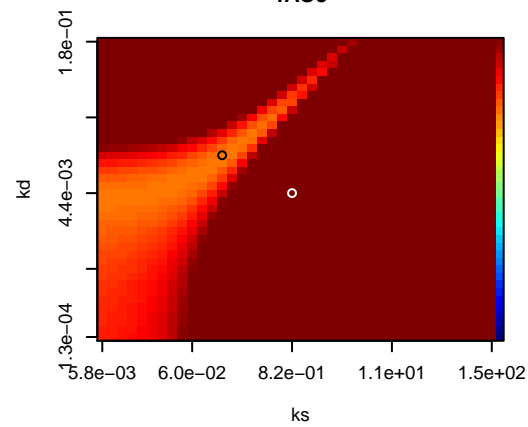**RPA135**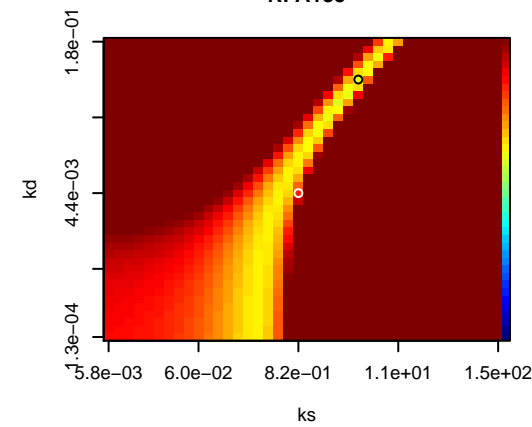**ADE1**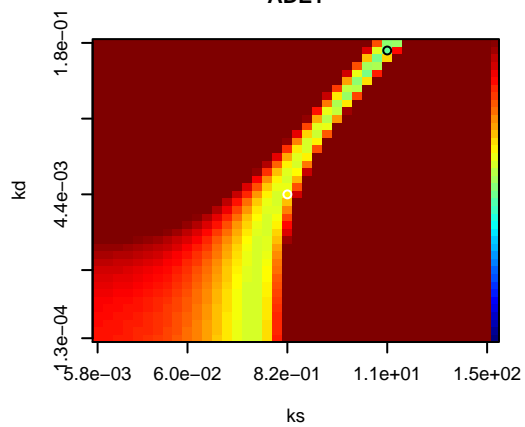**GIM5**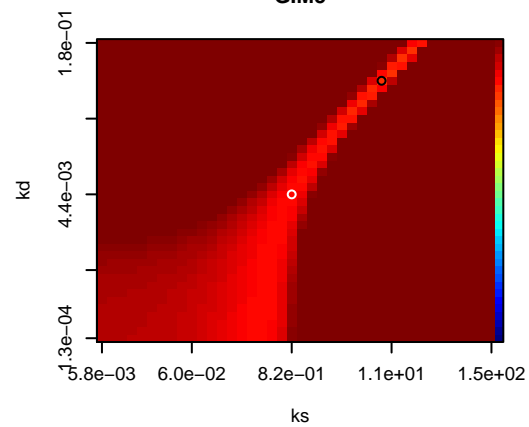**EFT2**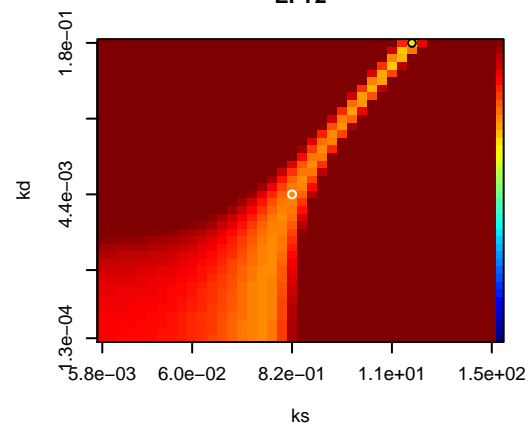**RPL4B**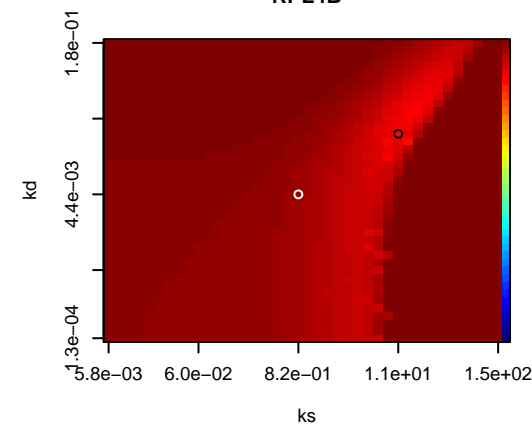**RPL8A**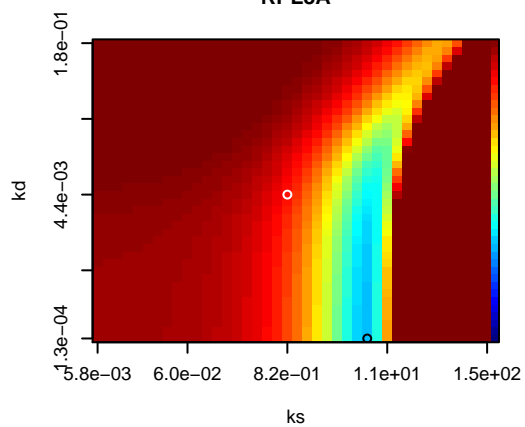**NMA111**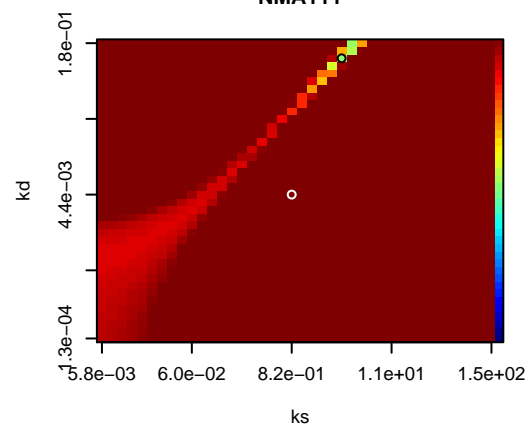**RPL21A**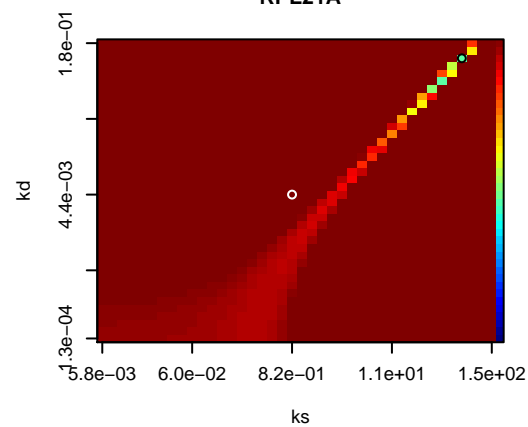**LAT1**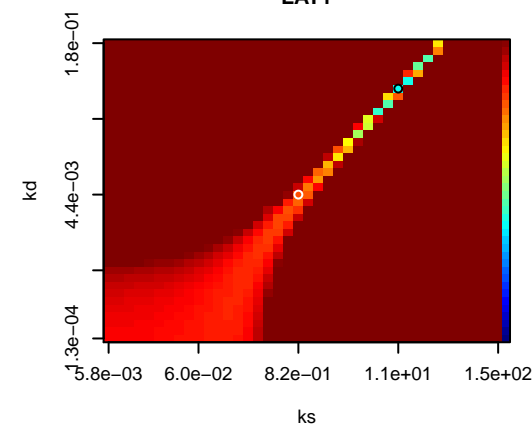

**APE2**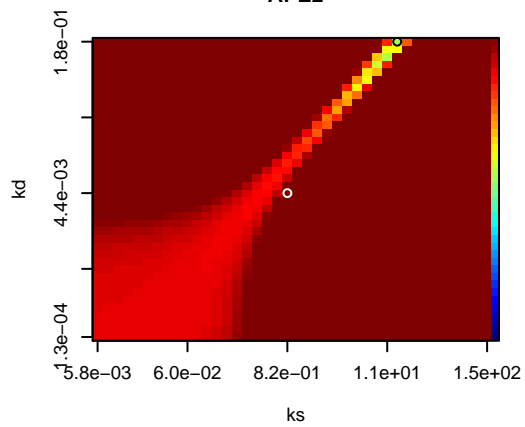**MVD1**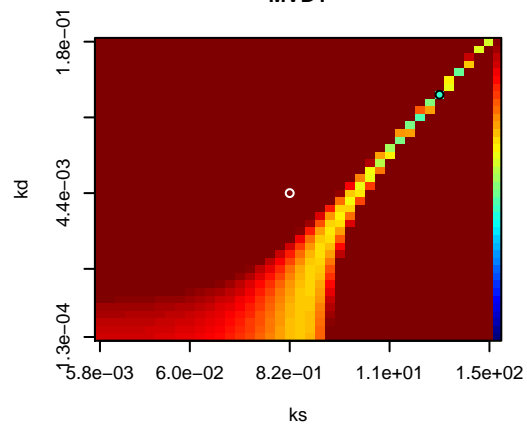**BFR1**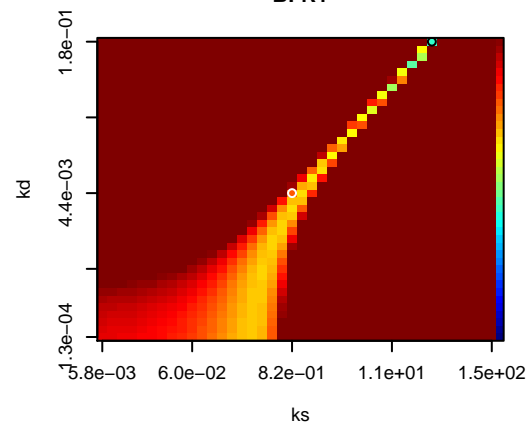**PPH22**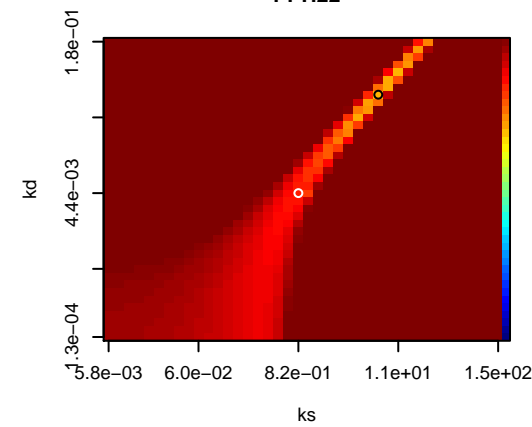**PDA1**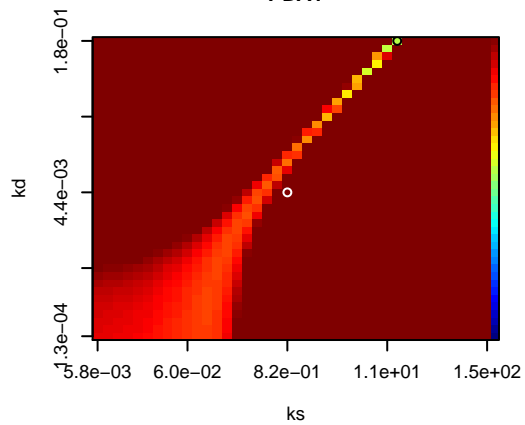**CPR6**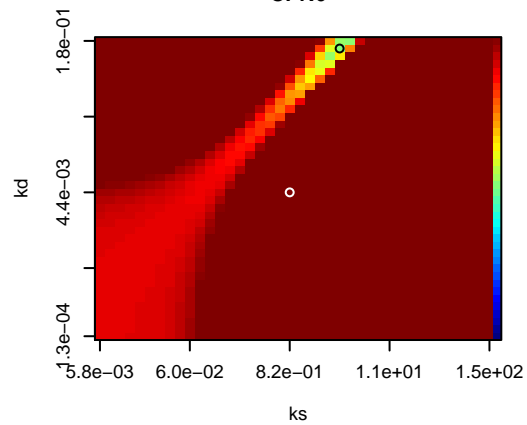**RPT5**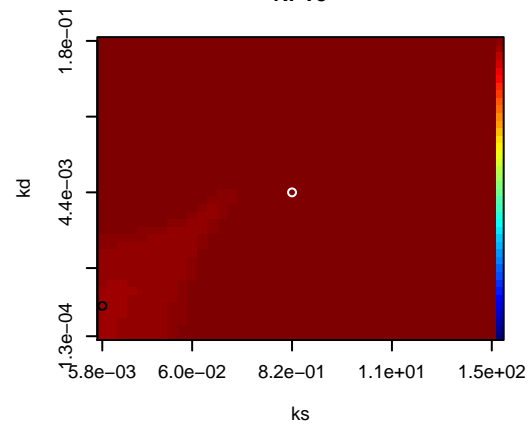**NAS6**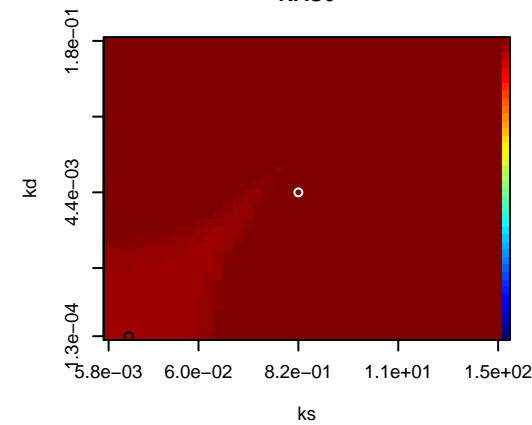**STI1**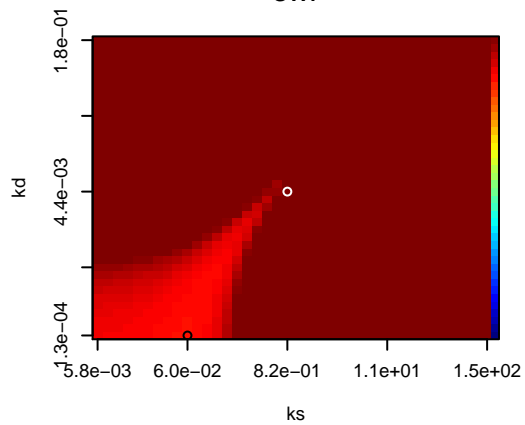**KCS1**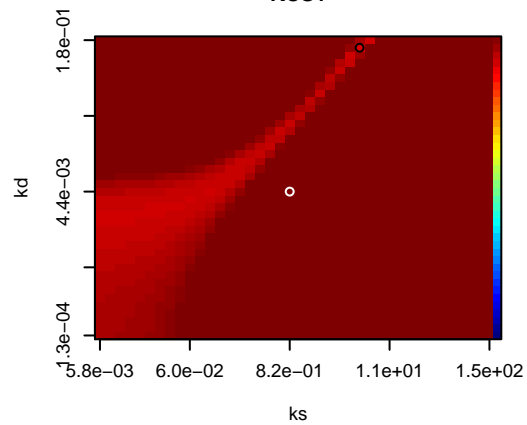**SAC6**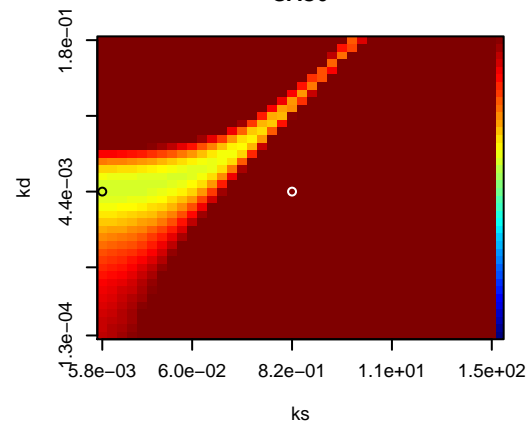**BBC1**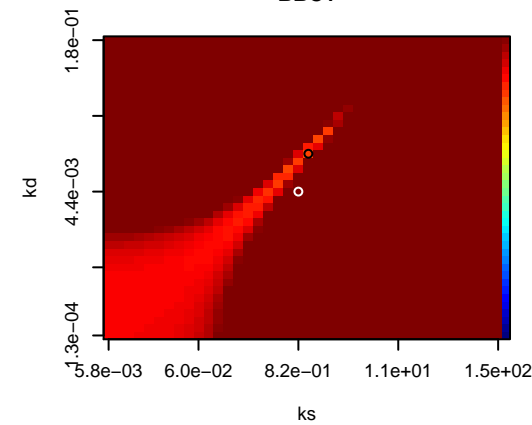

CCP1

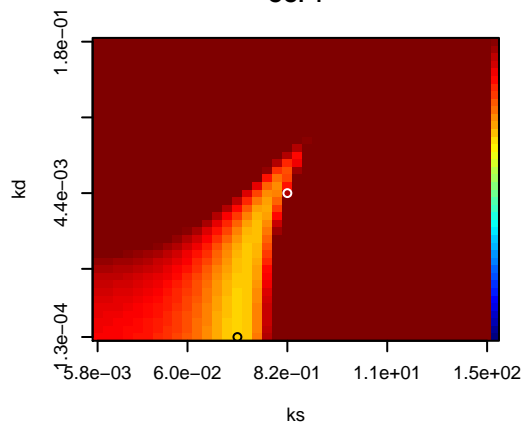

SOL3

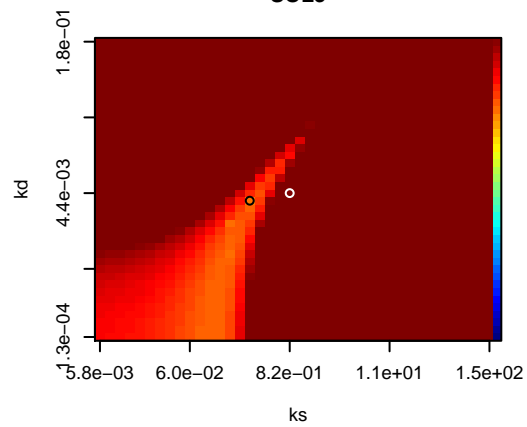

KGD1

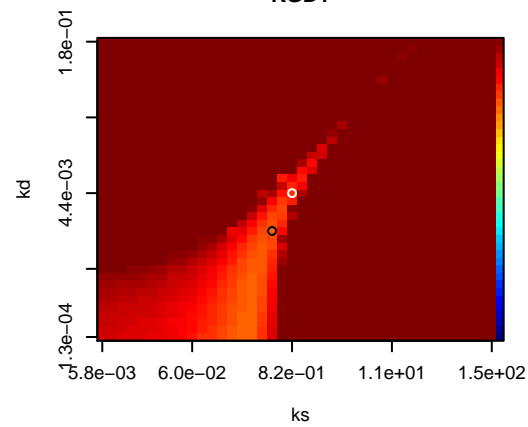

ANB1

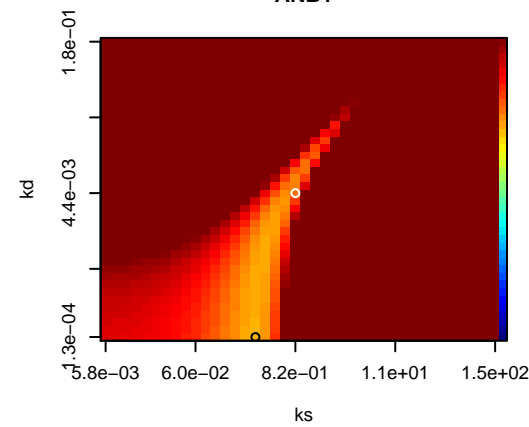

SCL1

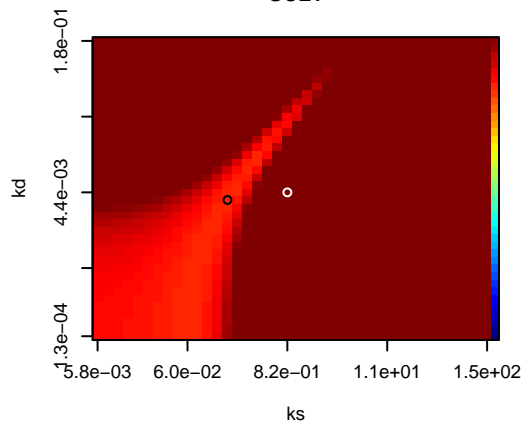

GCS1

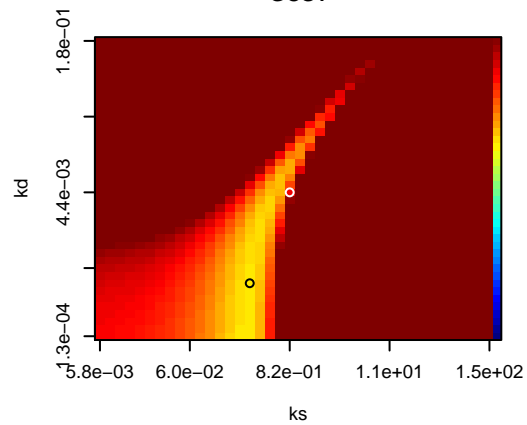

TEF2

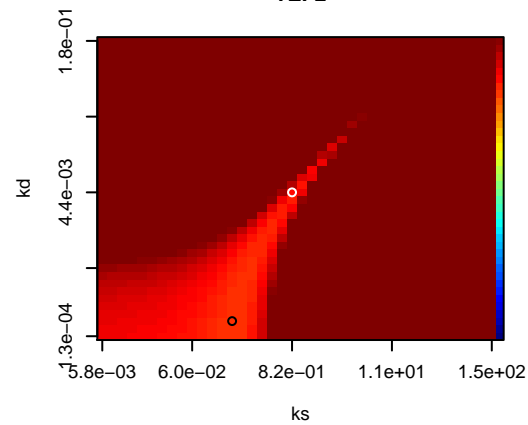

PRE8

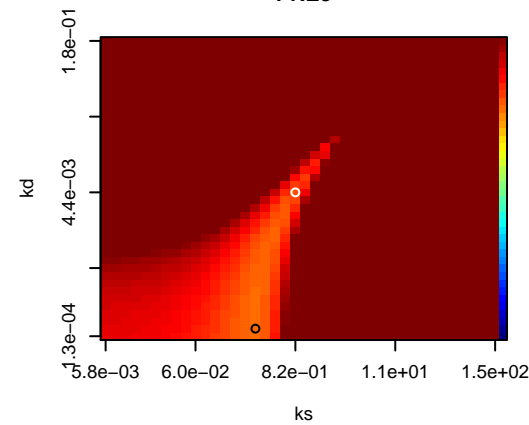

SMC1

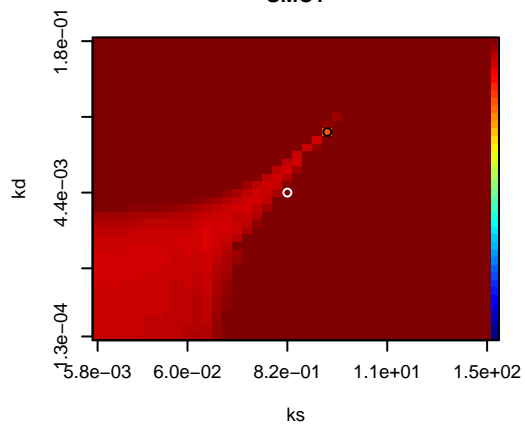

TAN1

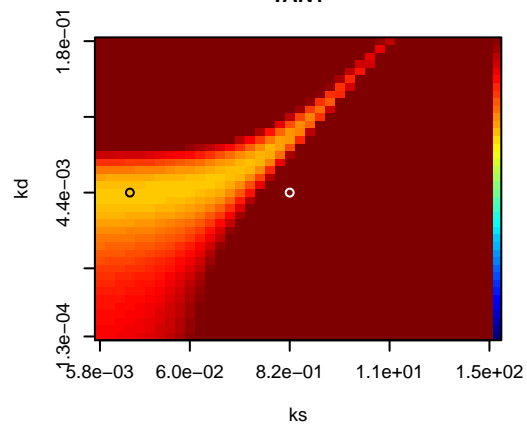

SEC14

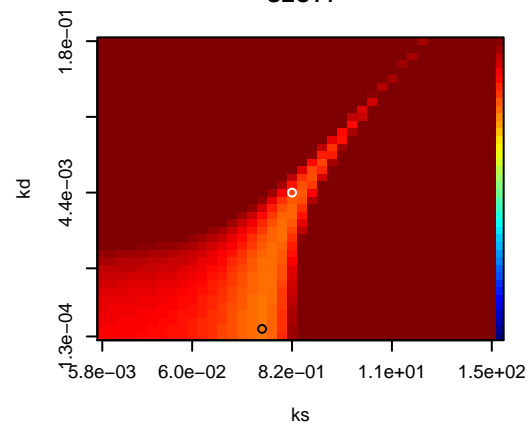

LAP2

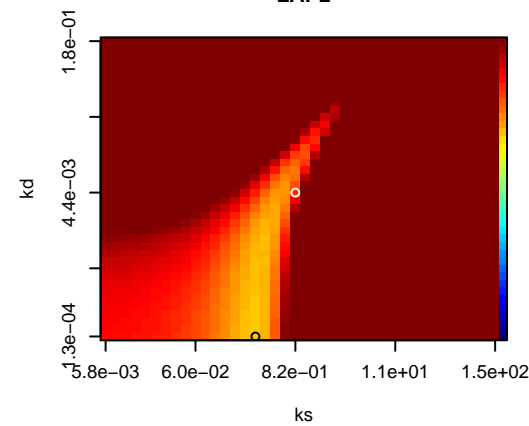

VAM6

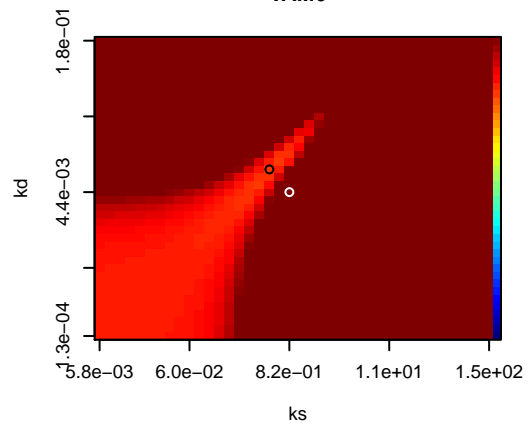

VMA4

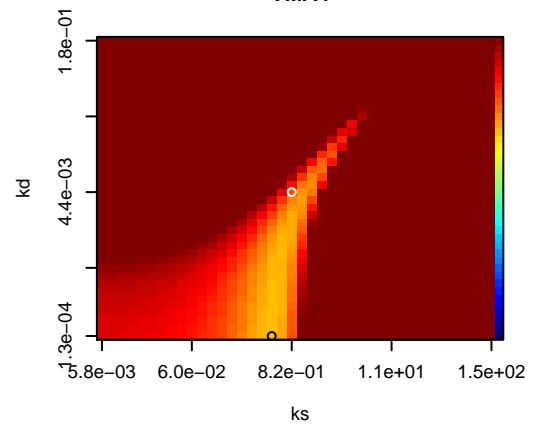

Supplement: c4mb00358f2.zip [file c4mb00358f2.zip]
