# Supplementary material for: One third of dynamic protein expression profiles can be predicted by a simple rate equation
Source: Royal Society of Chemistry journal article supplement (doi:10.1039/c4mb00358f), 2014-08-01

TIM13

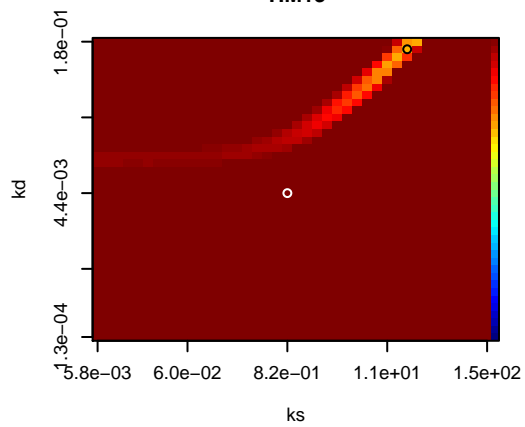

YGP1

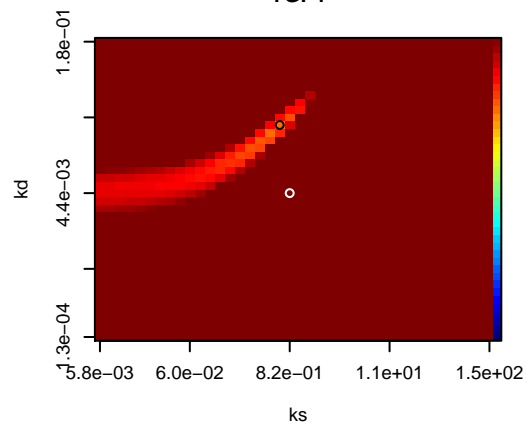

NAT1

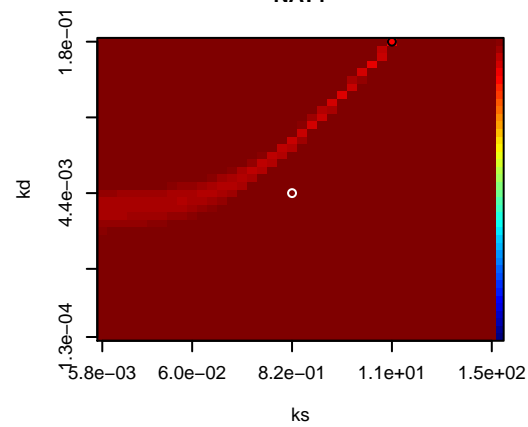

DUG1

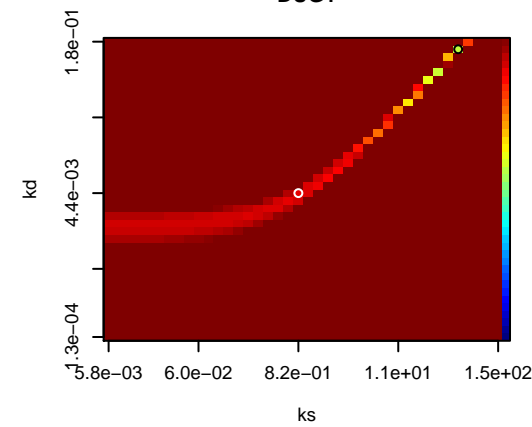

USO1

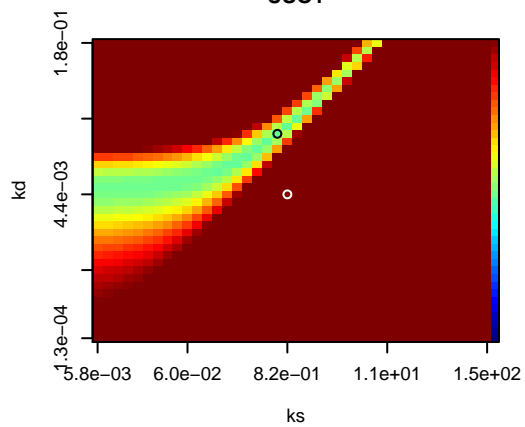

OAF1

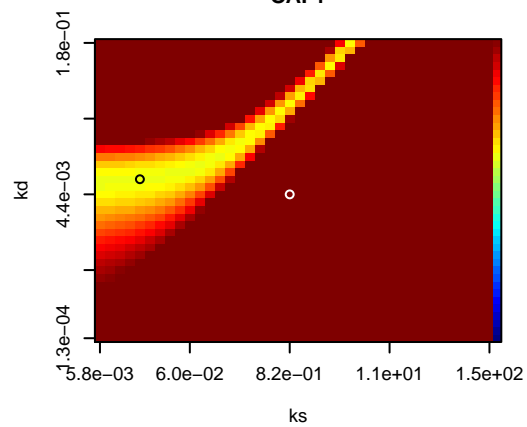

RPL9B

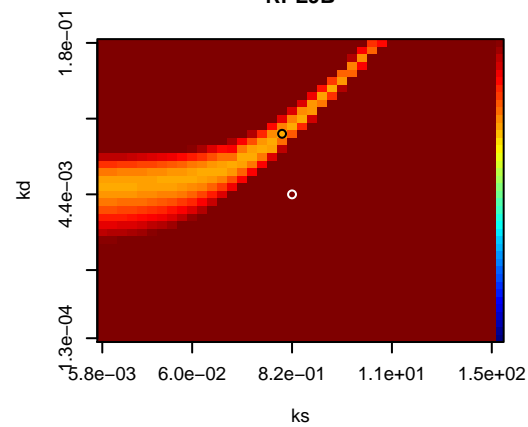

GCV3

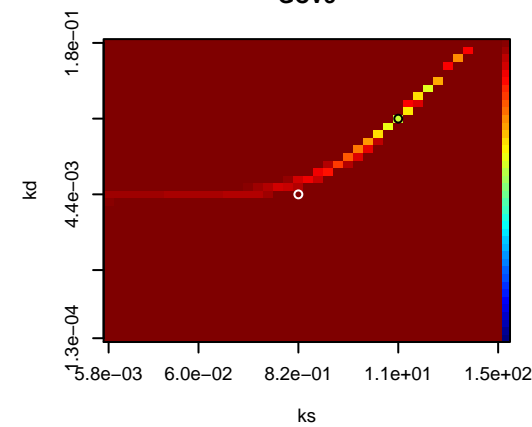

MET6

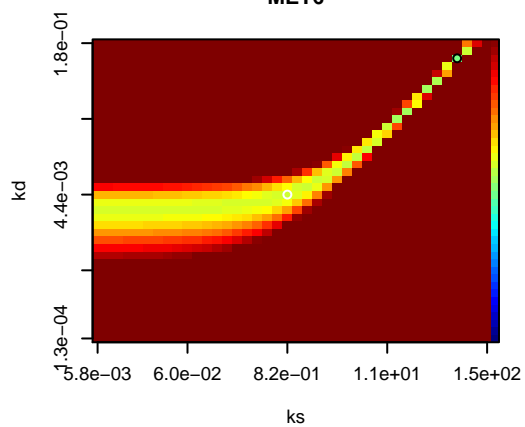

YGL242C

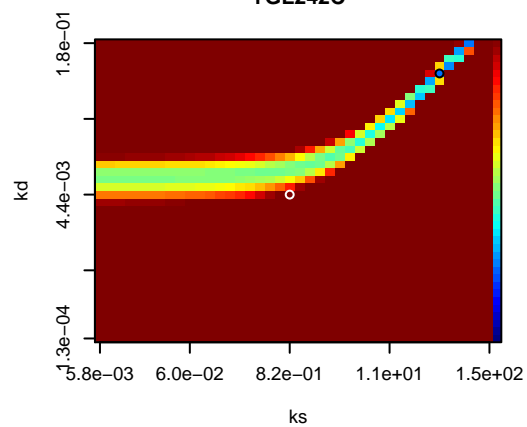

PHO13

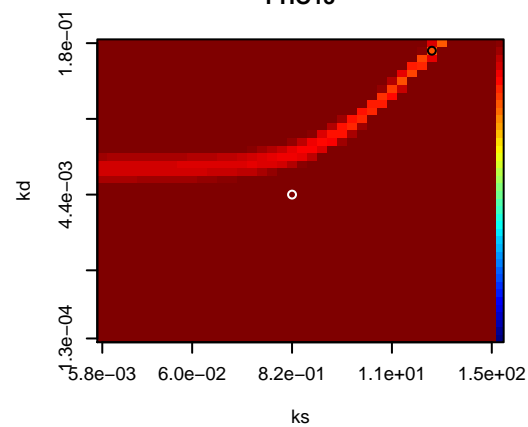

PRO2

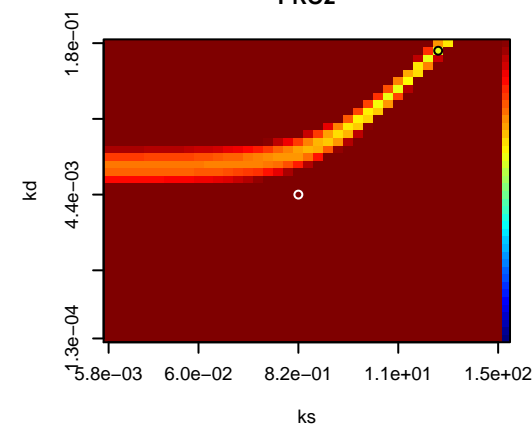

NPC2

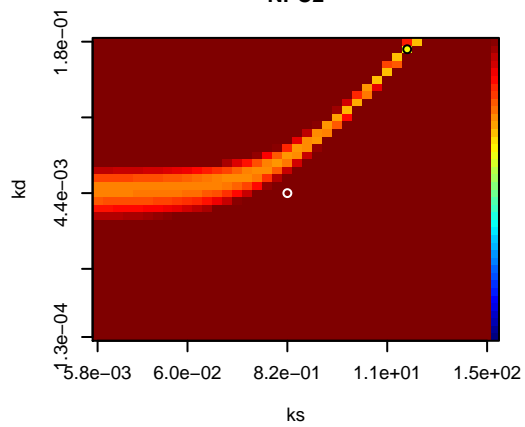

ADE2

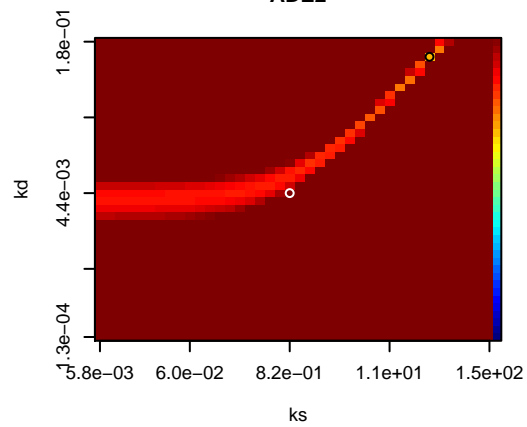

TAF10

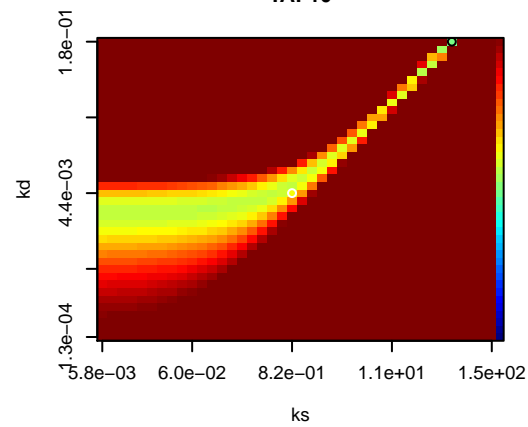

YGR054W

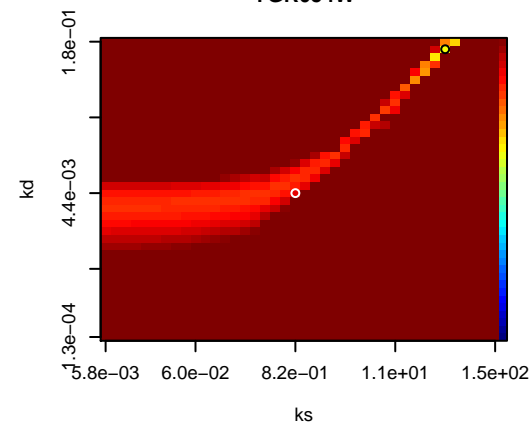

RPS17B

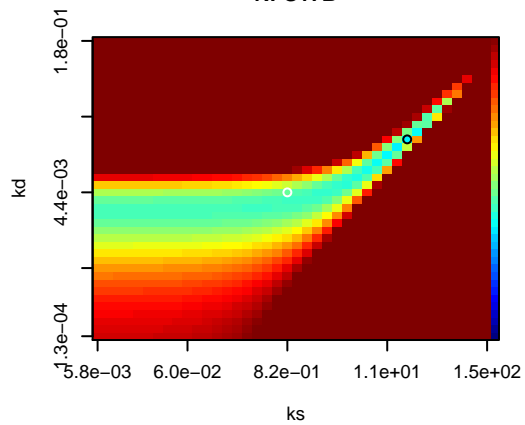

RPS15

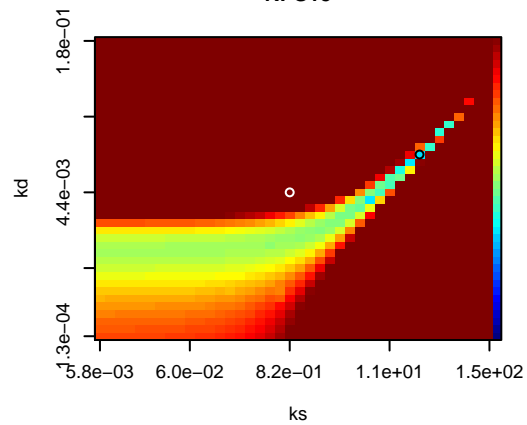

KGD2

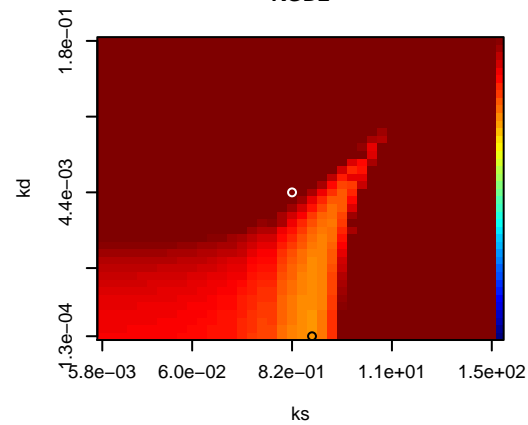

RPS21B

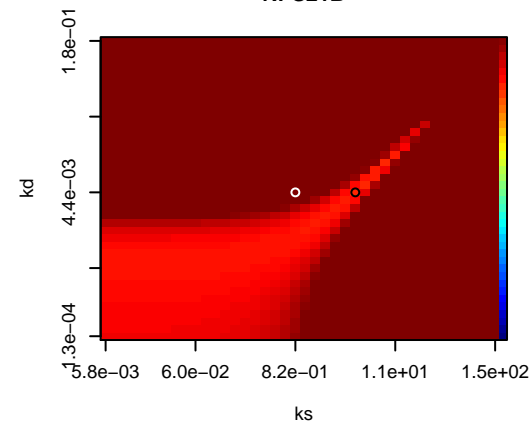

SHB17

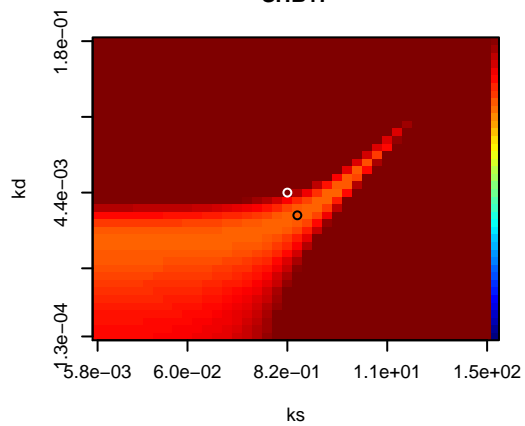

RPS5

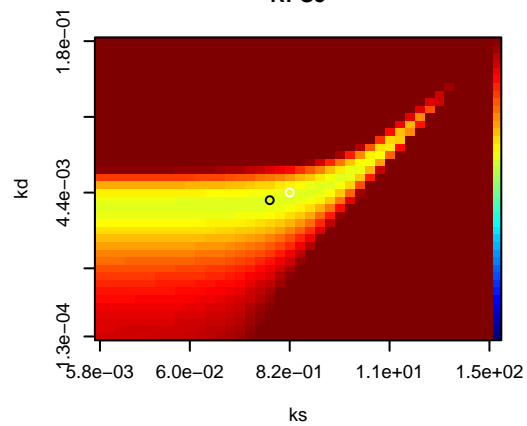

TRM112

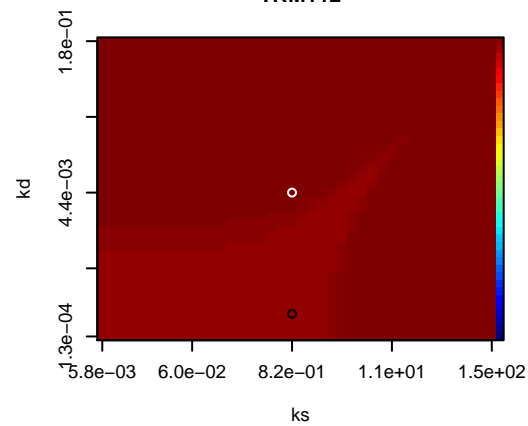

RPL17A

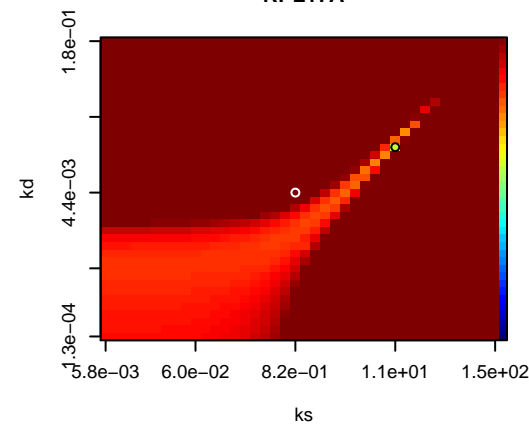

RPL25

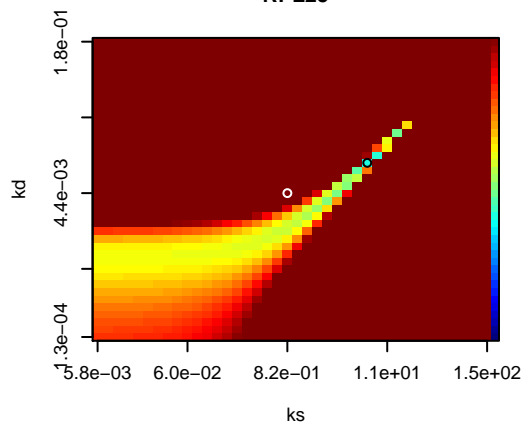

RPS6B

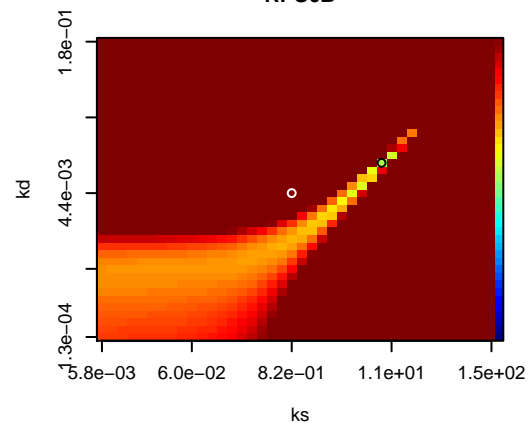

ADH1

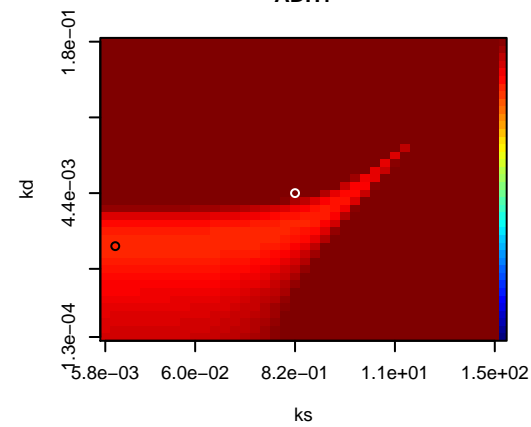

IDH1

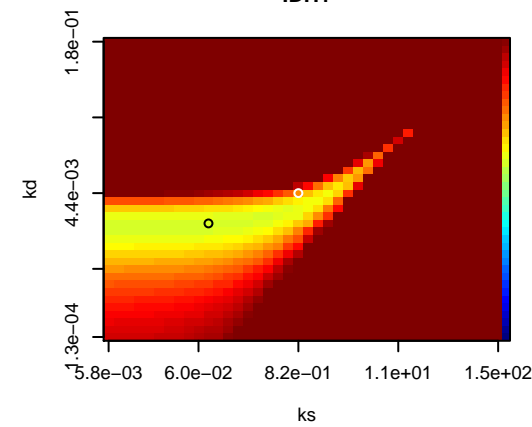

IPP1

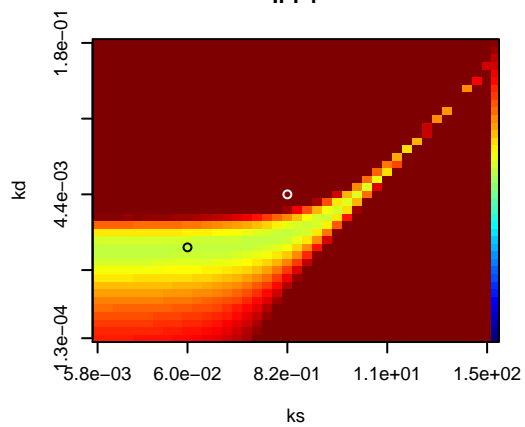

RPL23A

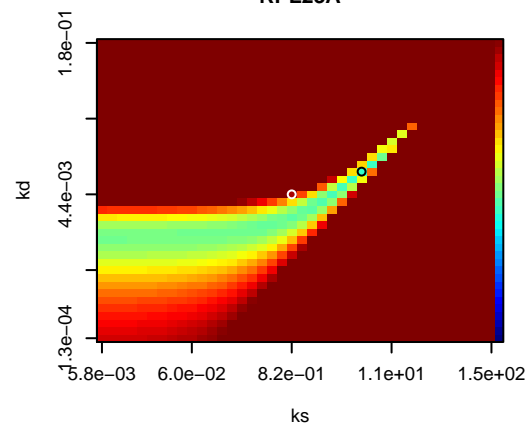

EFB1

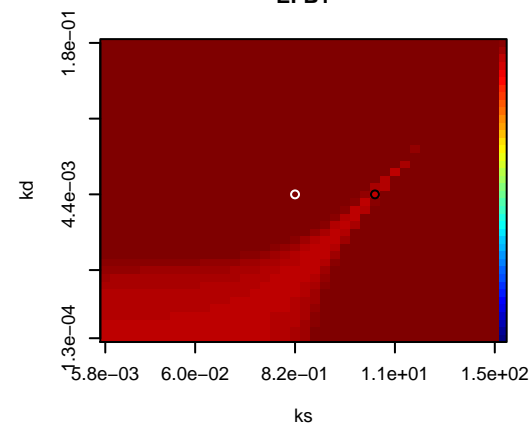

ATX1

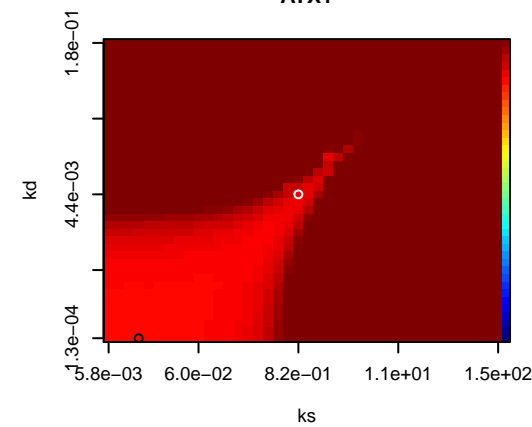

NOP12

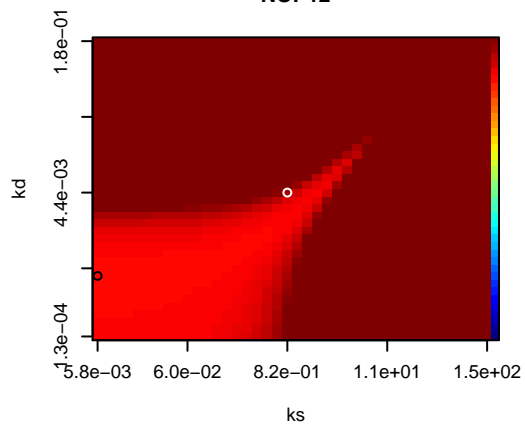

DED81

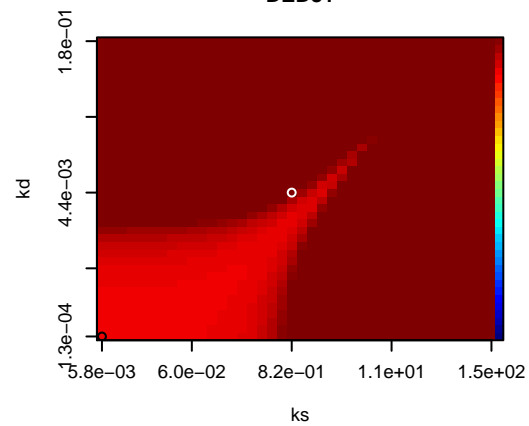

HAM1

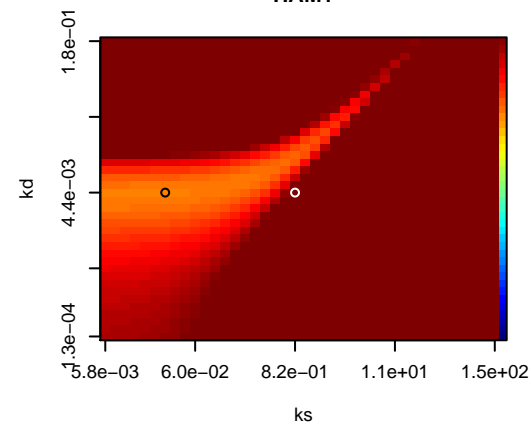

TPI1

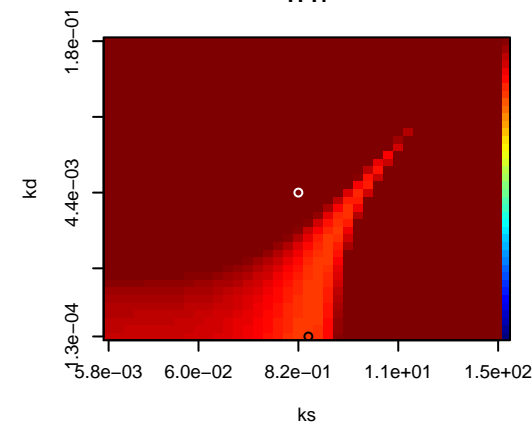

YAR1

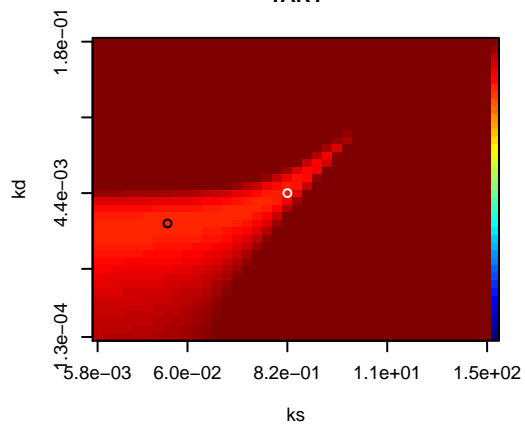

MNP1

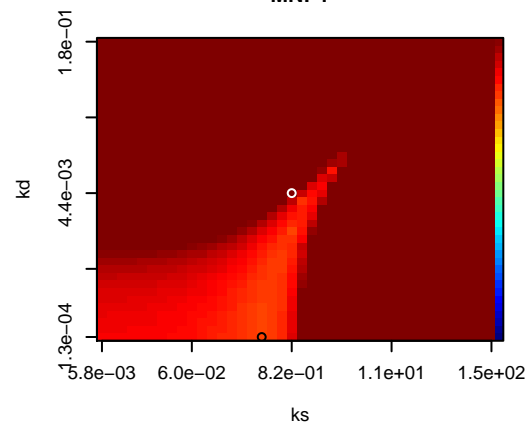

ARO9

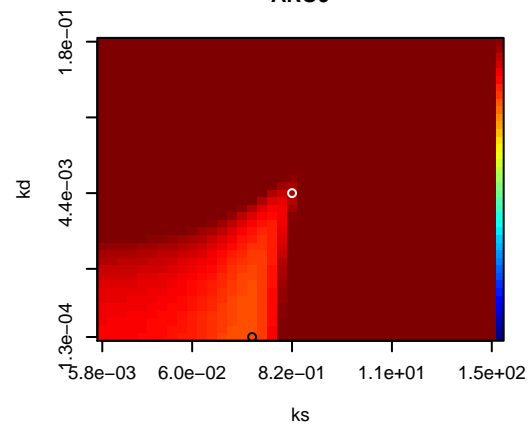

RPB10

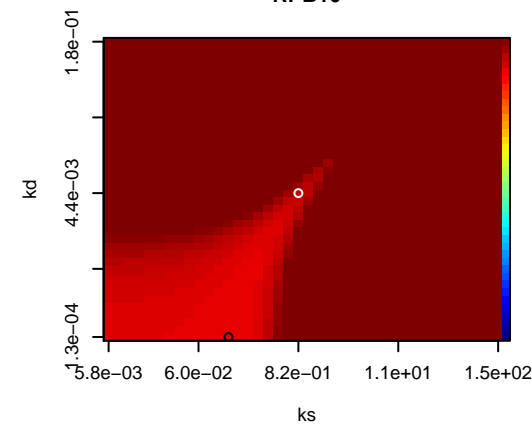

TMA19

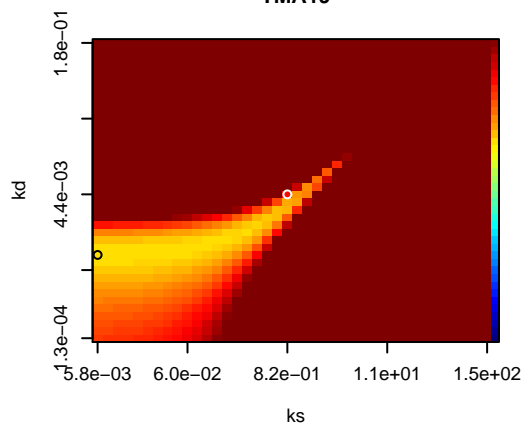

SAH1

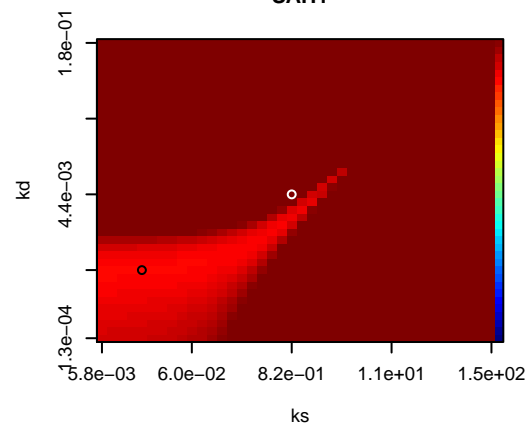

RPS14A

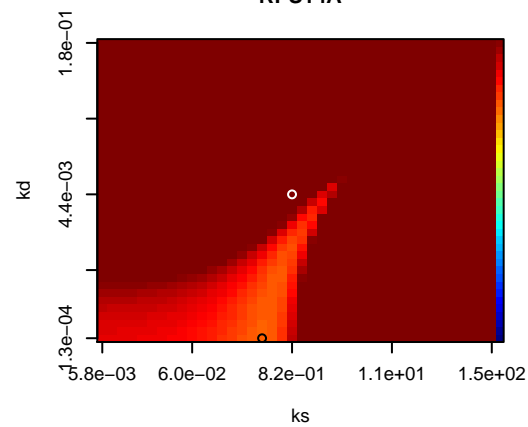

HPT1

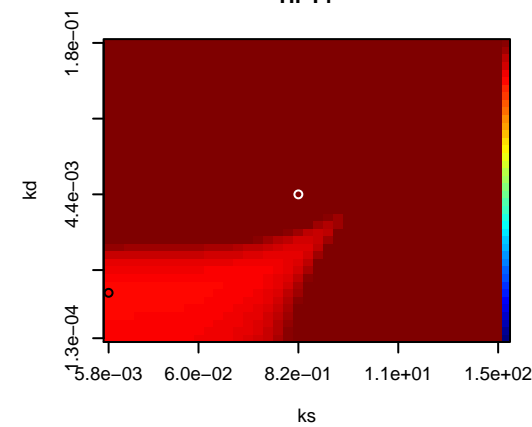

KRS1

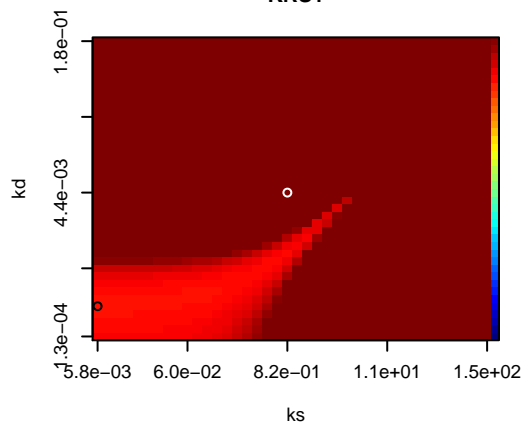

DPH5

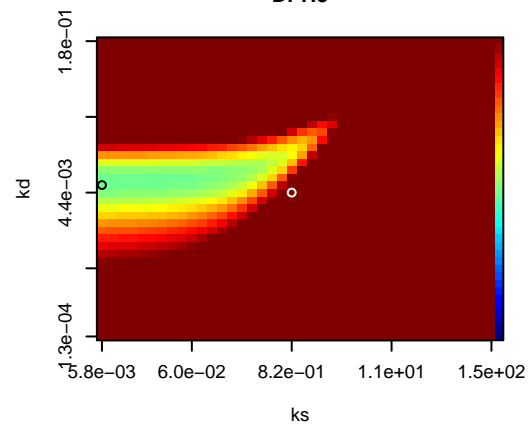

SEC53

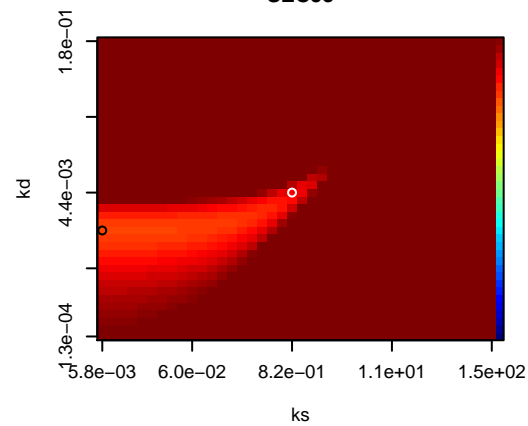

RPL33B

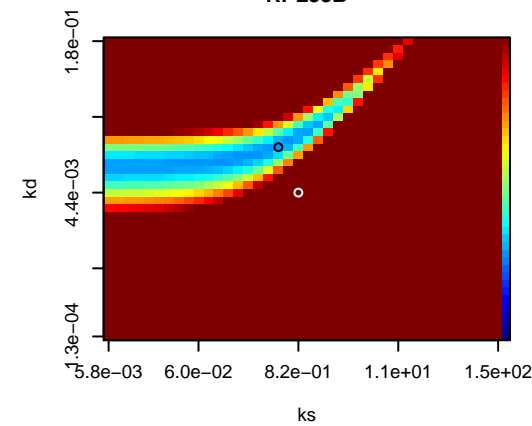

RPL3

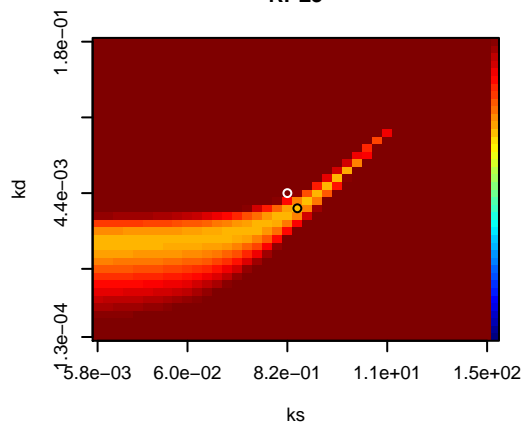

RPL20A

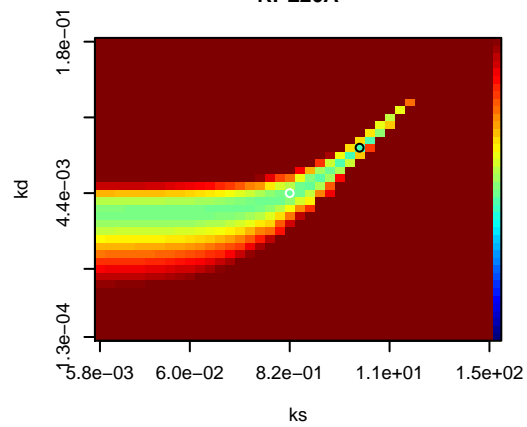

SIR2

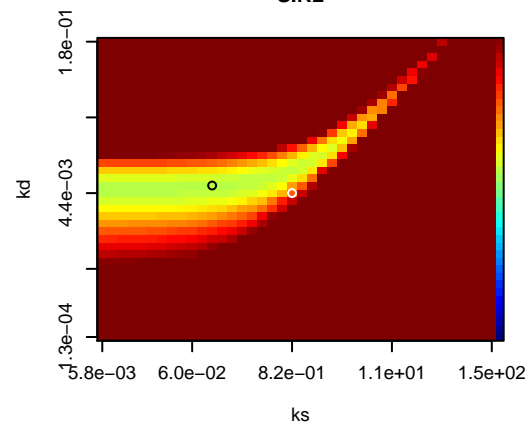

RPL16B

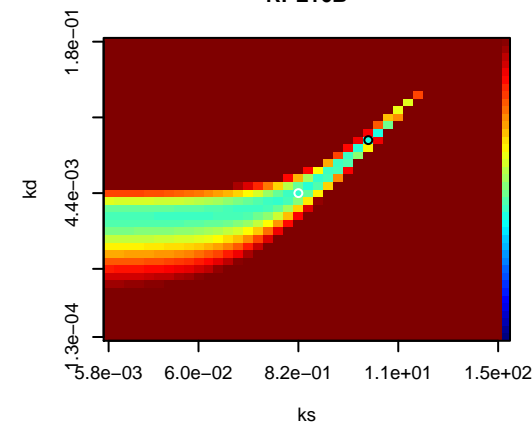

SPE3

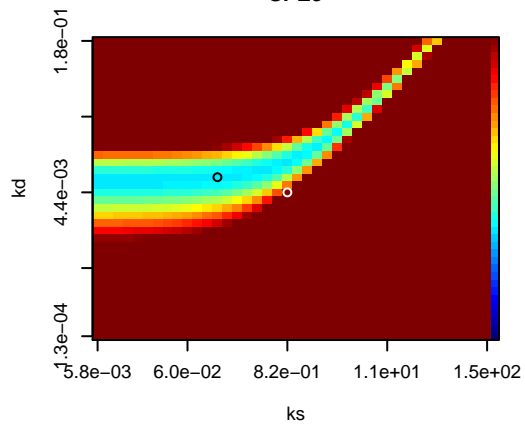

RPL31A

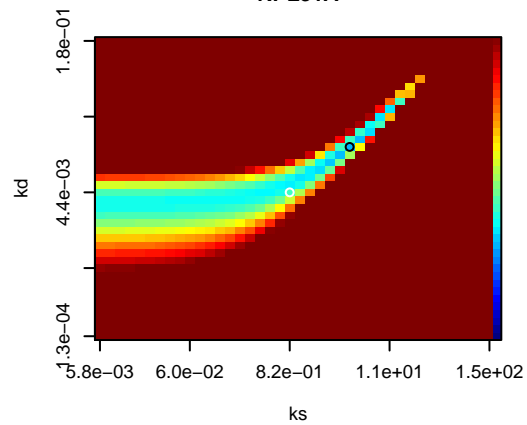

RPS2

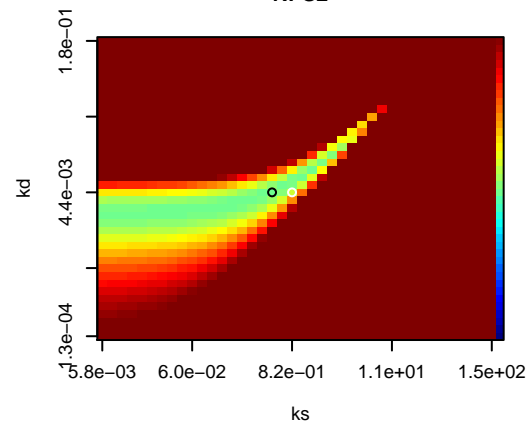

SES1

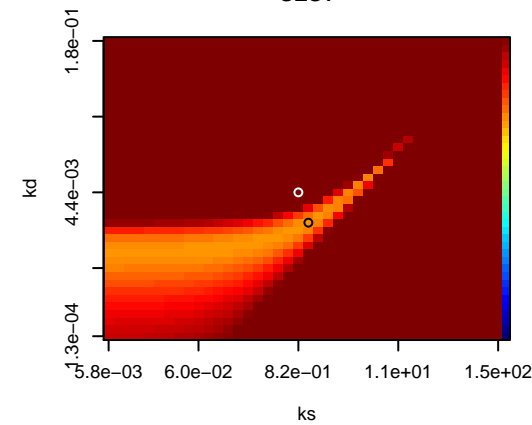

HTB2

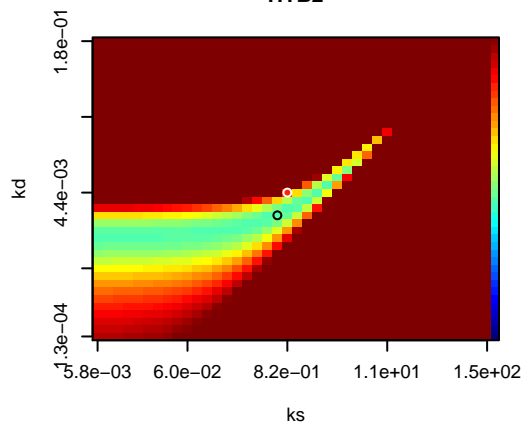

GGA2

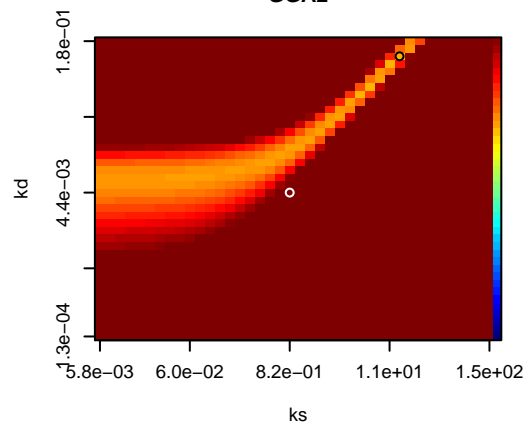

RPL14B

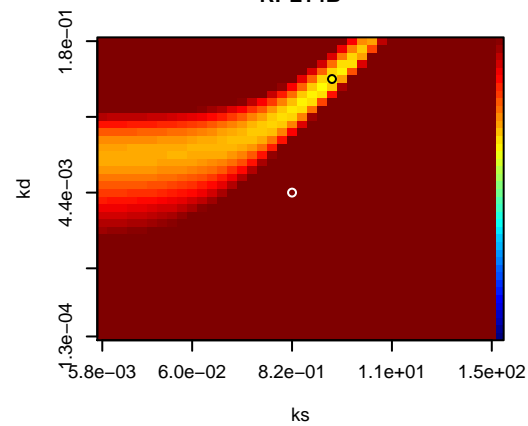

SKI2

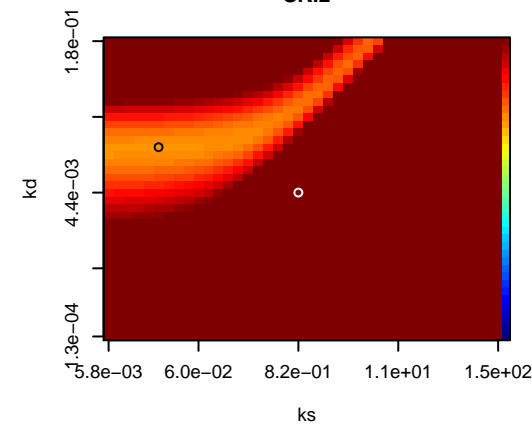

MLH1

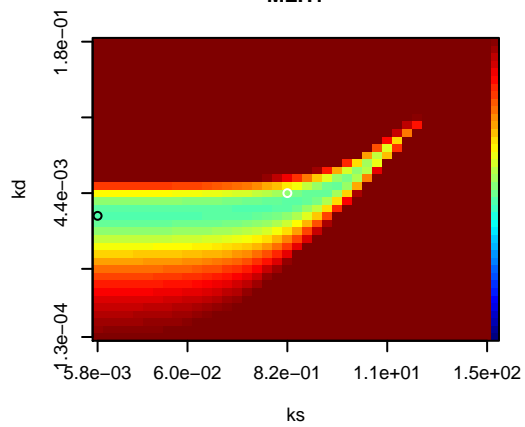

RPS11B

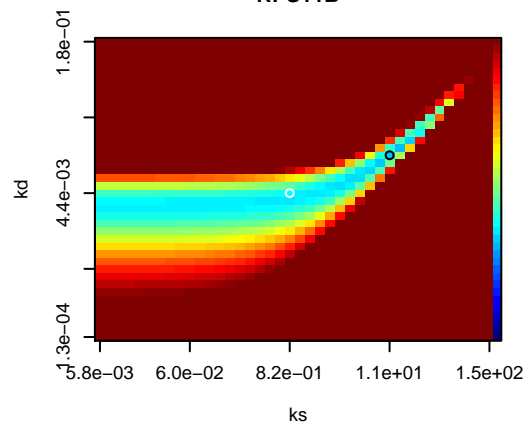

ASC1

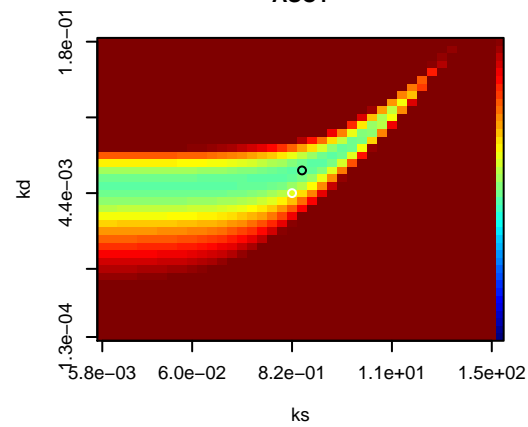

RPS8A

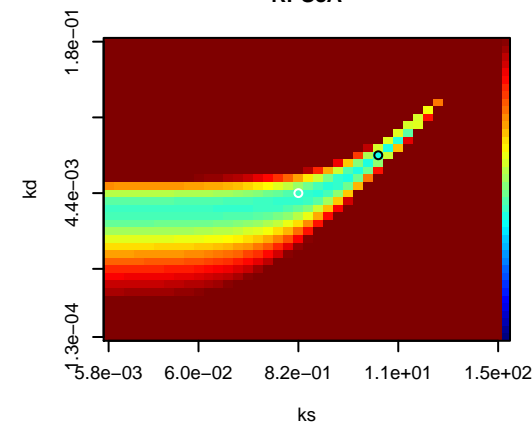

RPS13

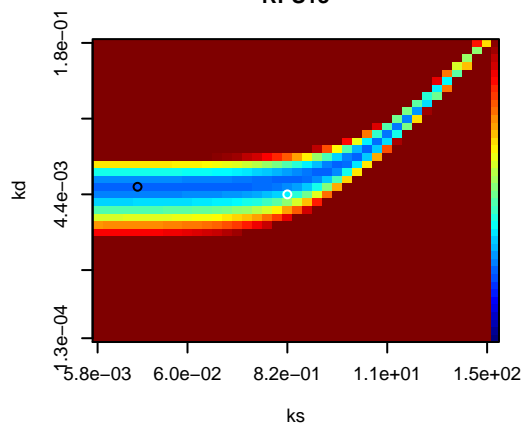

PHO11

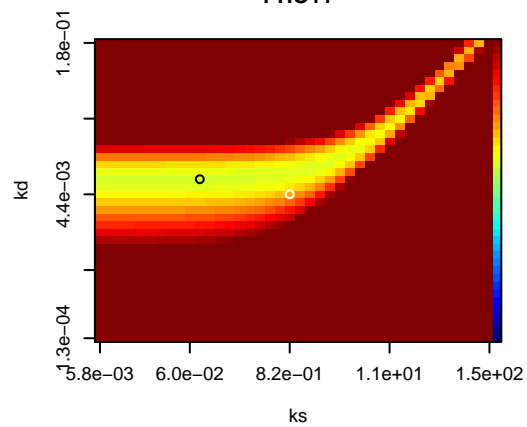

RPS28B

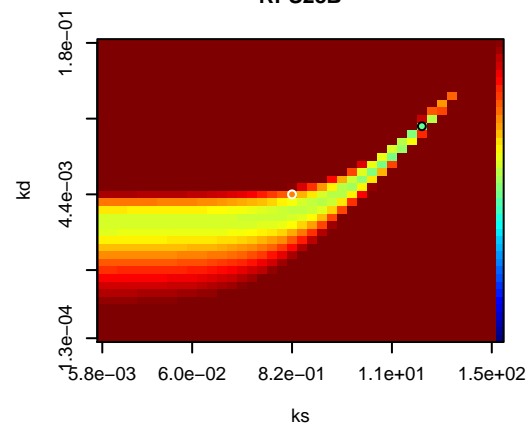

RPL14A

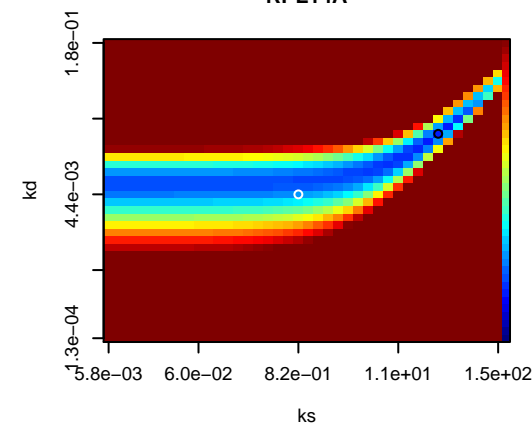

RPL13B

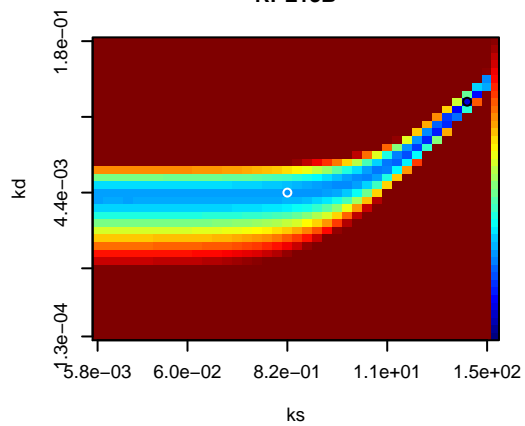

RPL4A

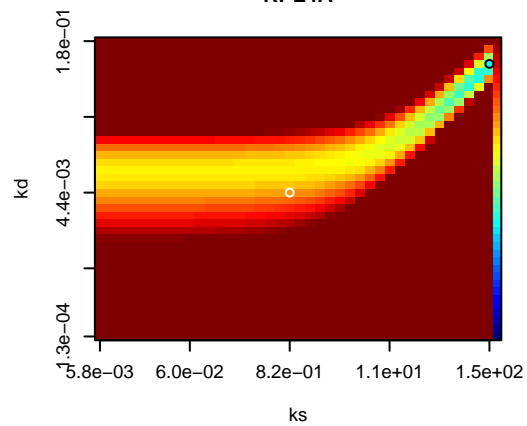

HIS3

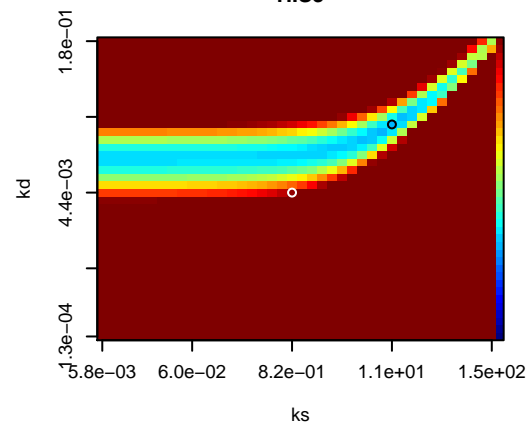

RPL34A

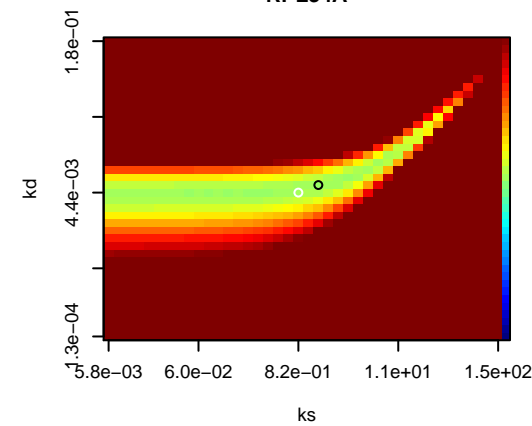

LSM6

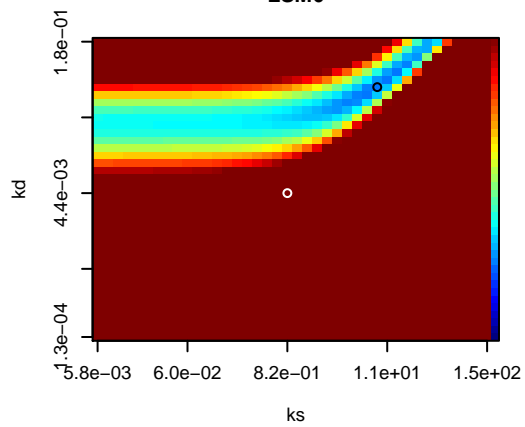

HIS1

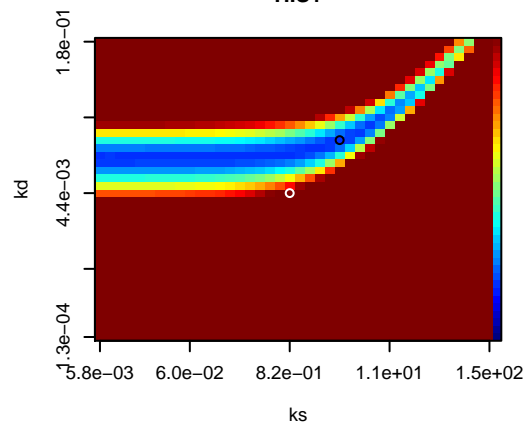

RPL30

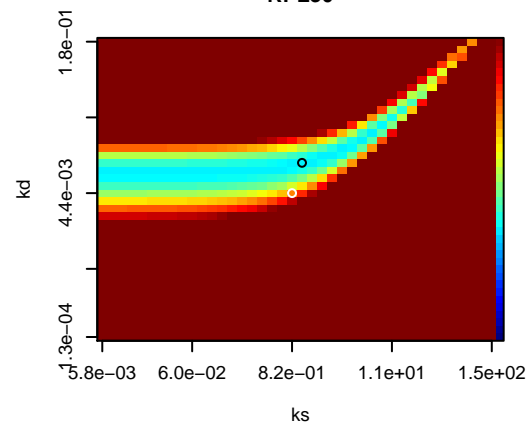

RPL8B

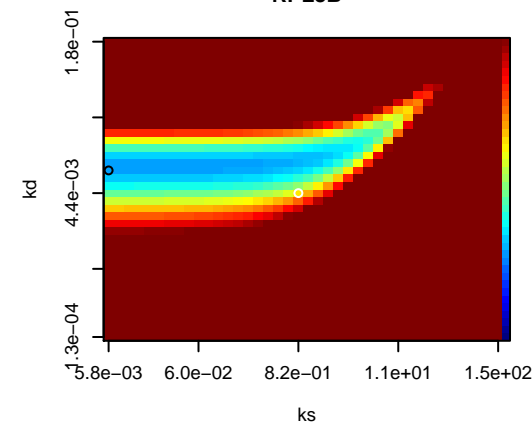

IMD4

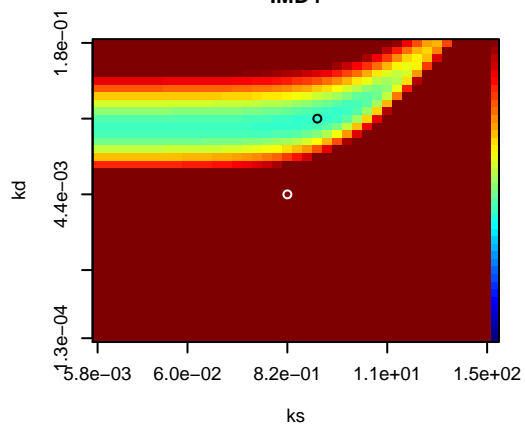

RPS18A

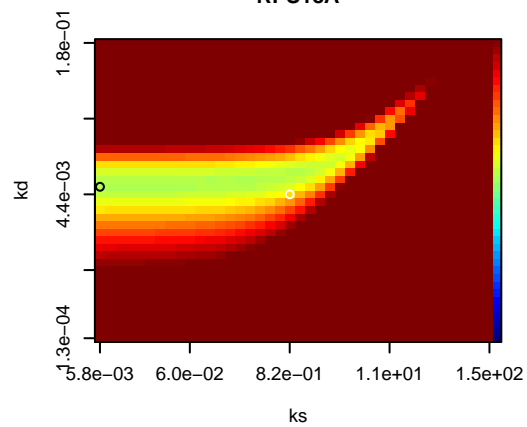

MDH3

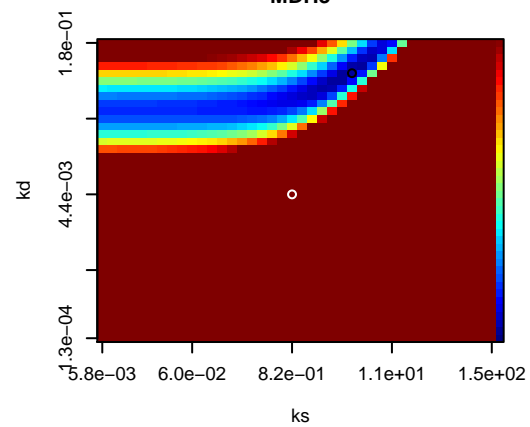

RPL18B

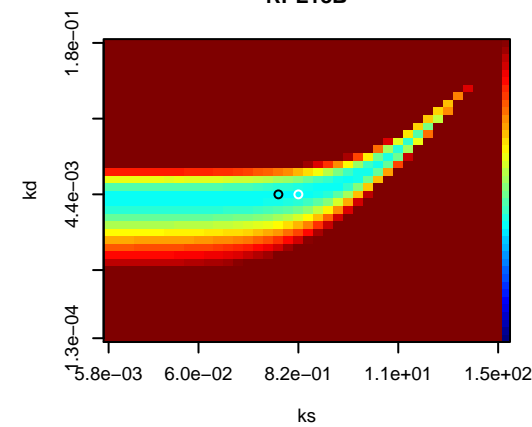

RPS16B

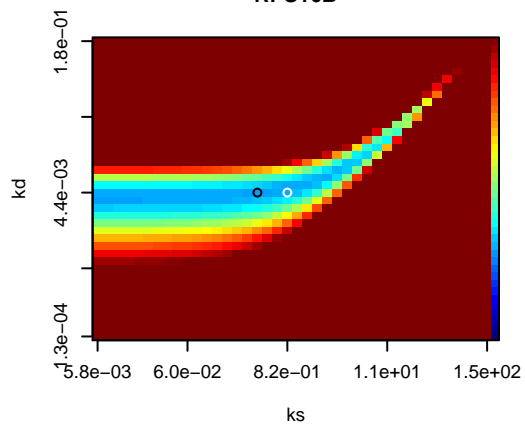

ADO1

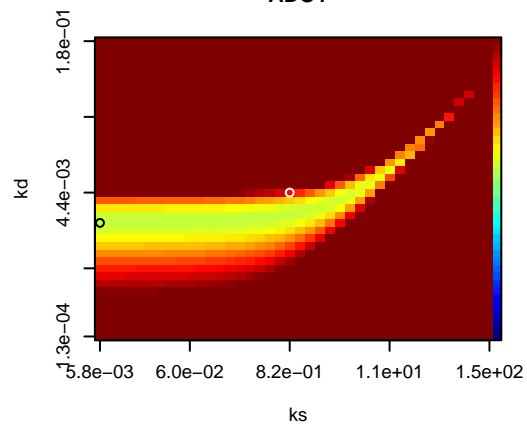

GLN1

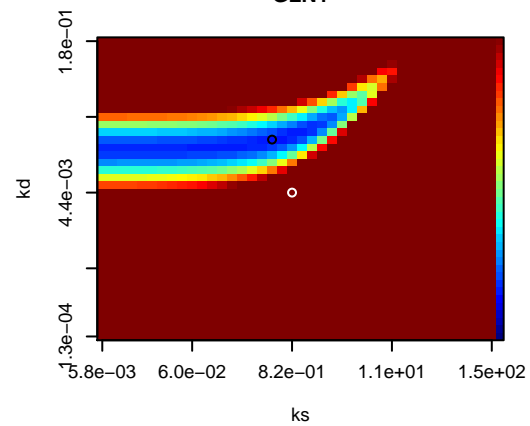

RPP1A

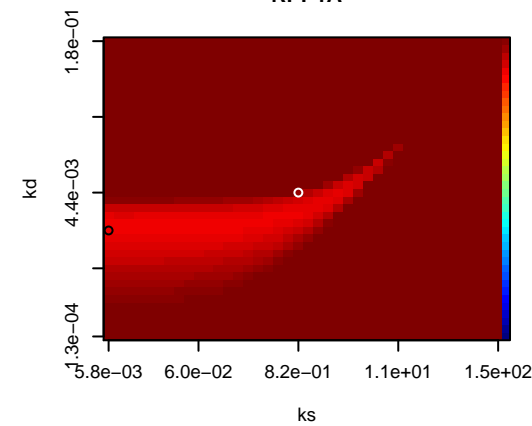

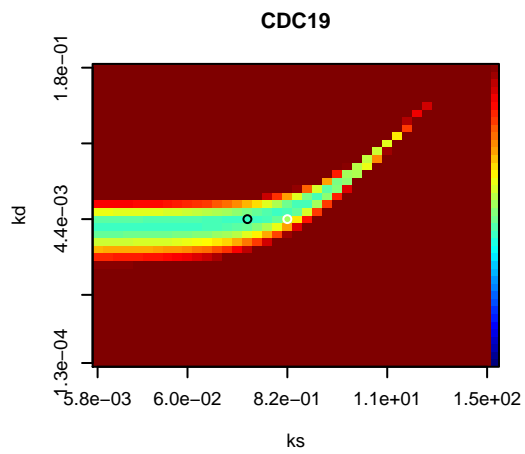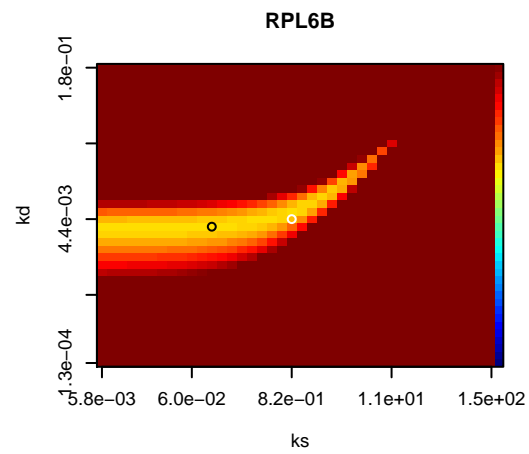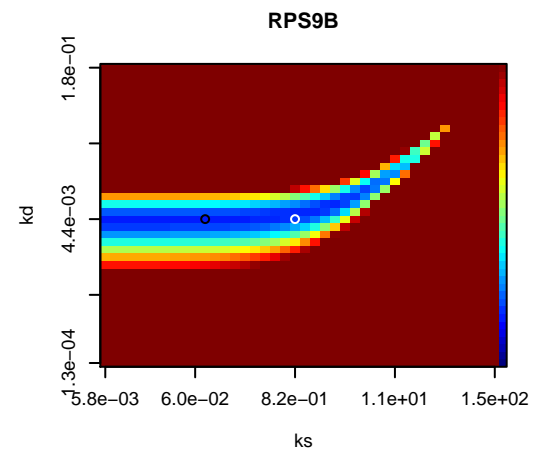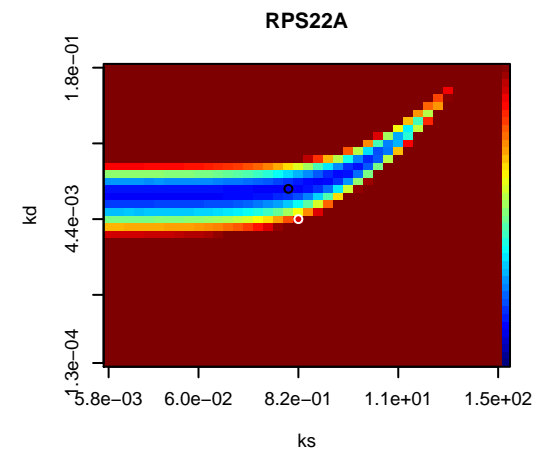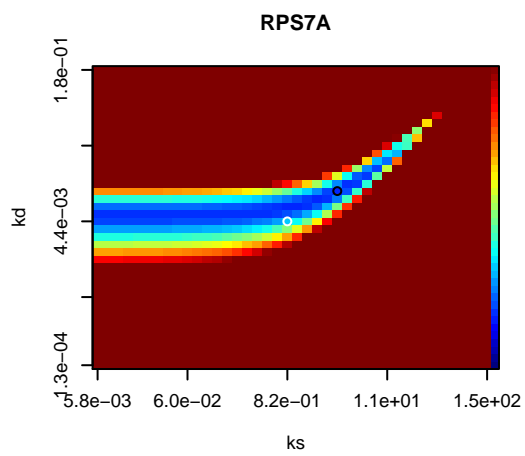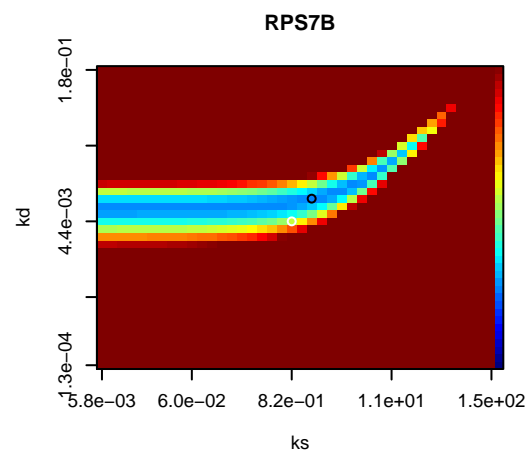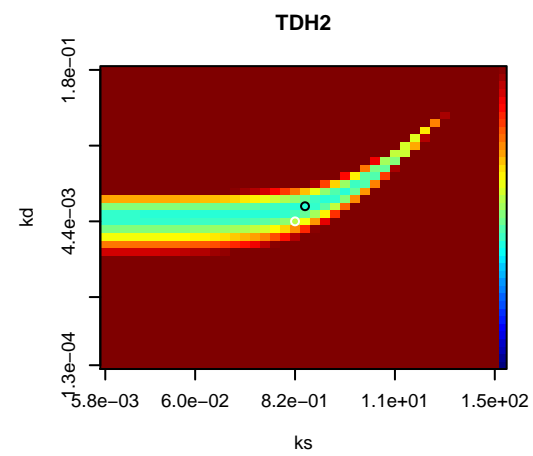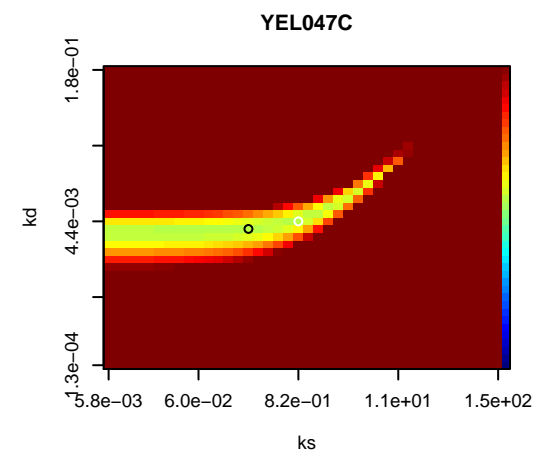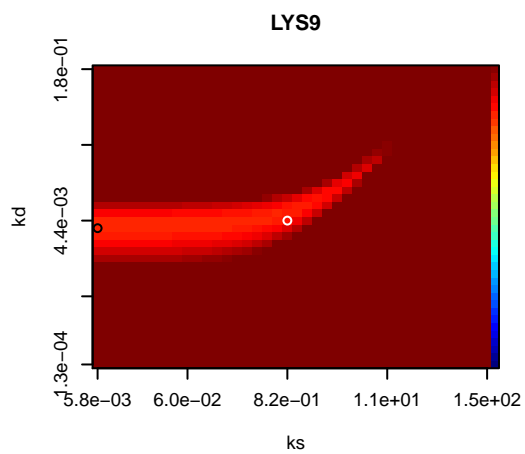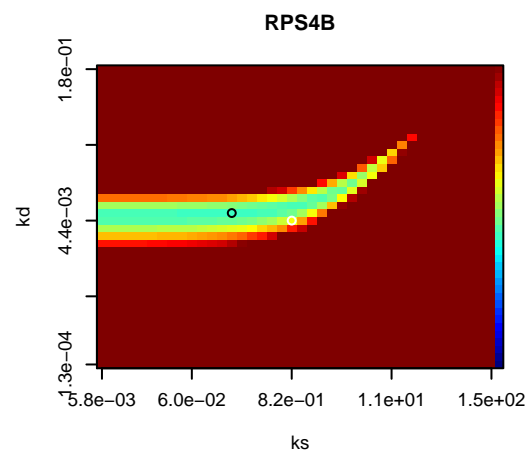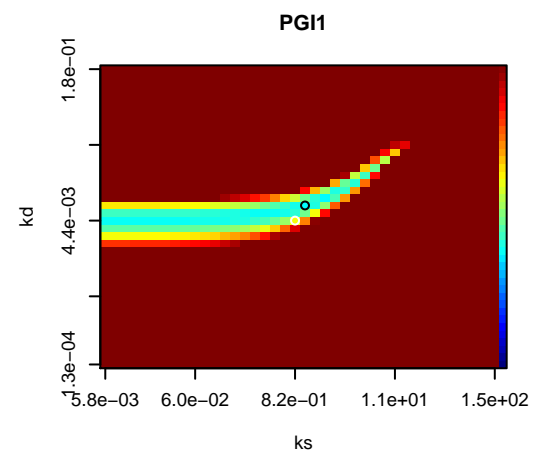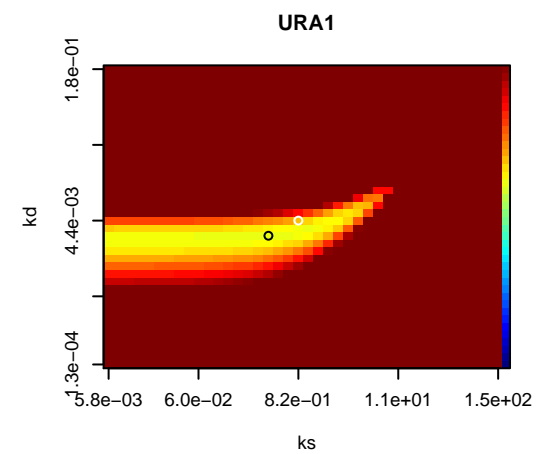



ADE13

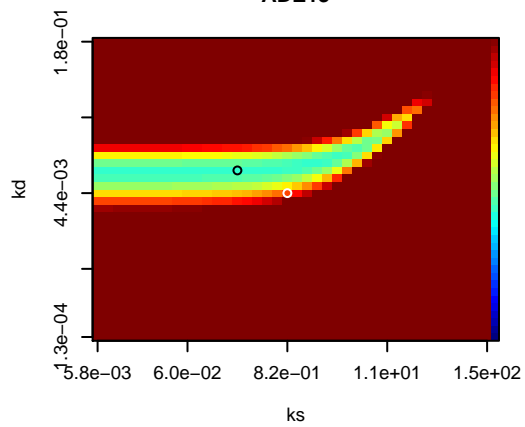

RPL35B

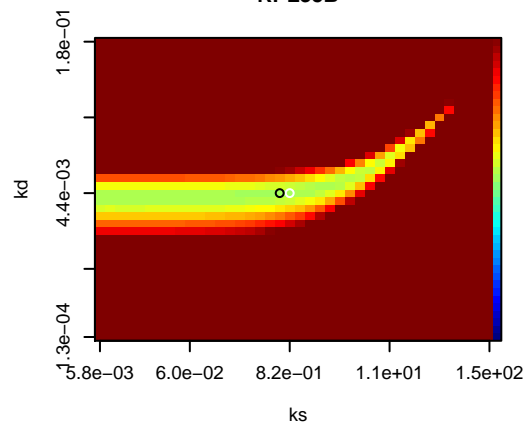

ILV5

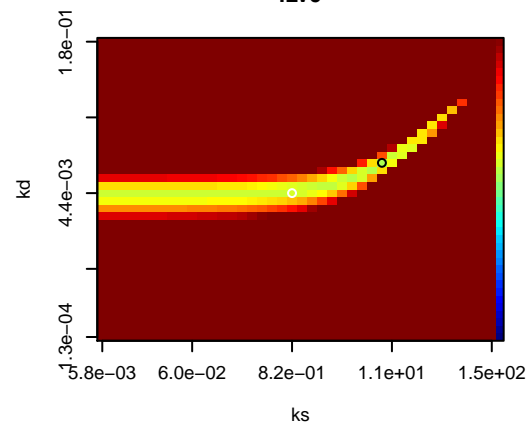

THR4

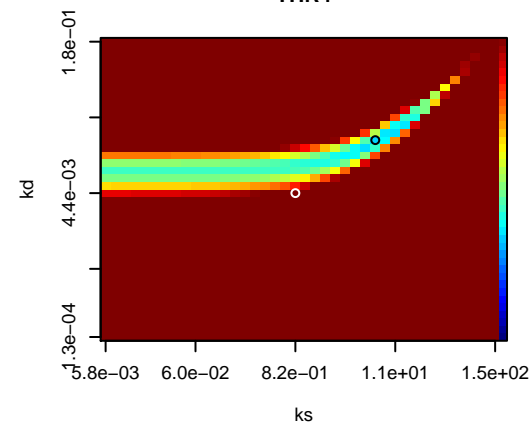

CDC60

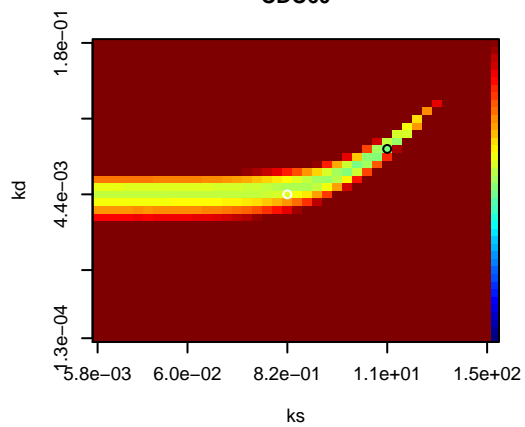

ADE6

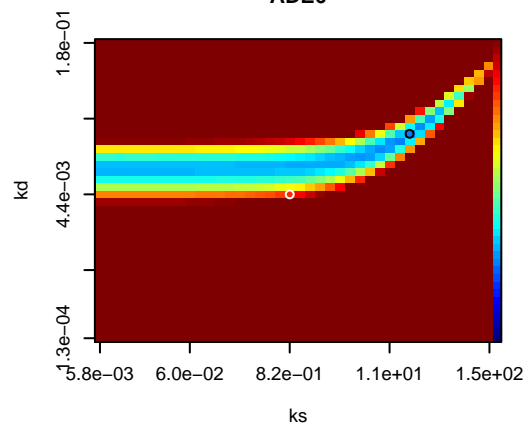

RPS24A

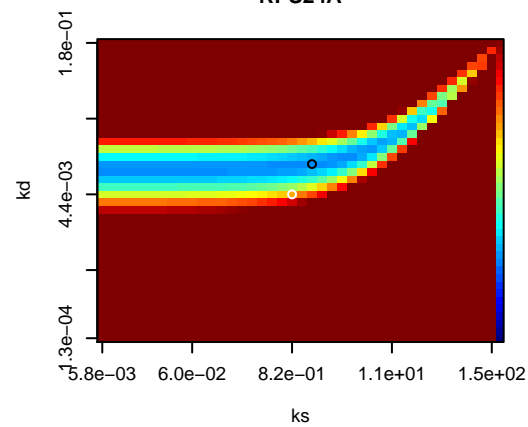

IDH2

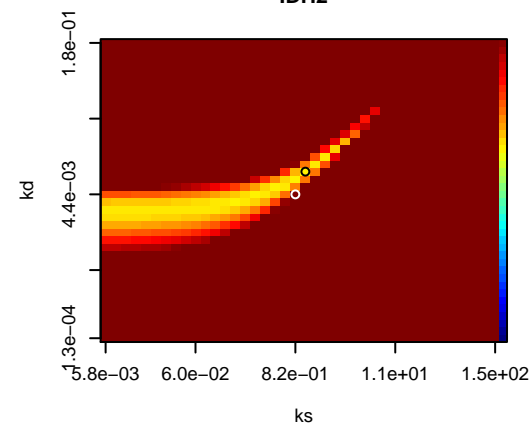

RPS12

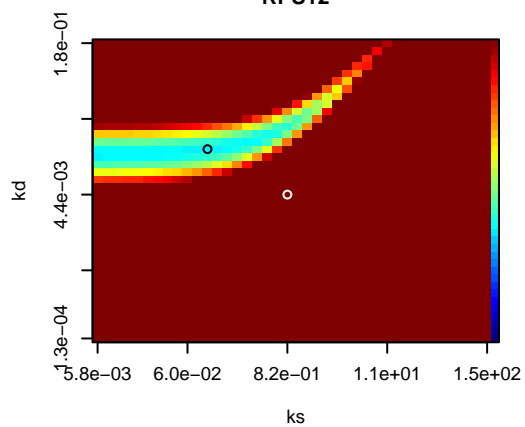

GLN4

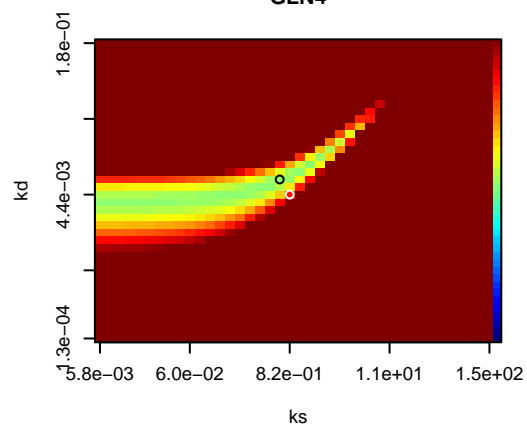

RPL5

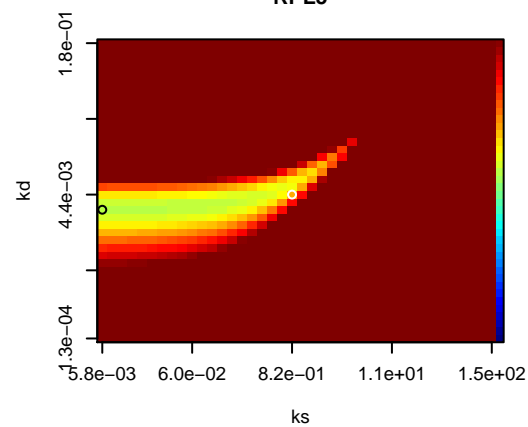

RPL11B

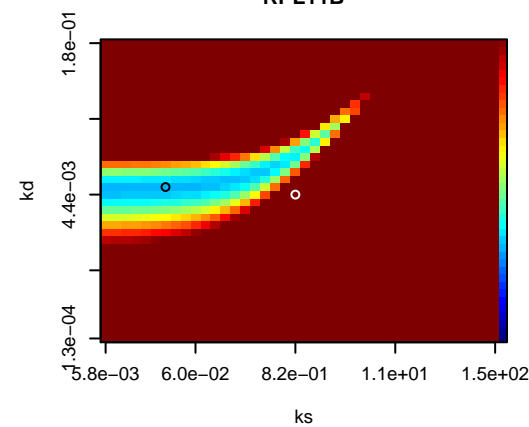

RPL16A

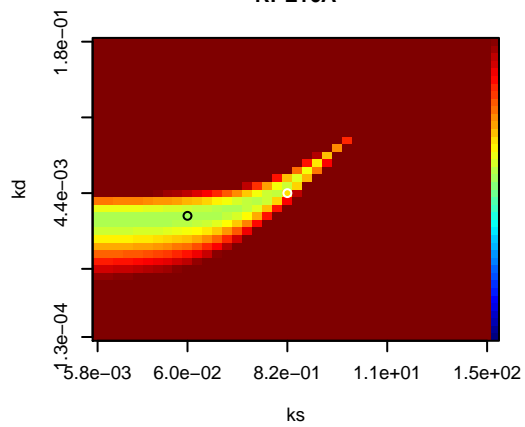

DSK2

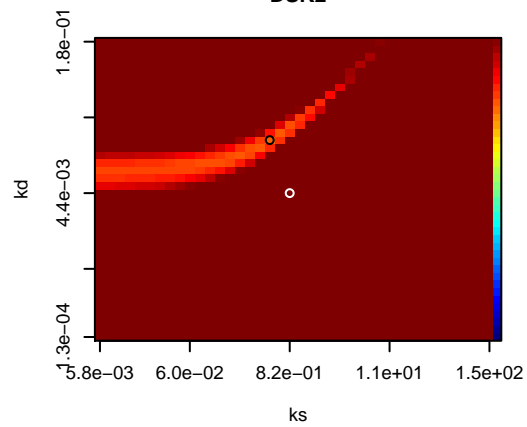

TIF2

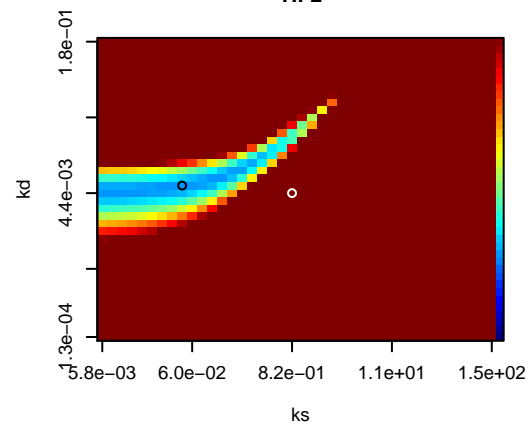

RPL6A

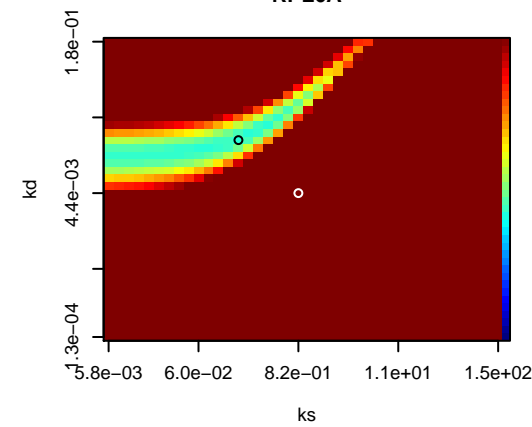

IDP1

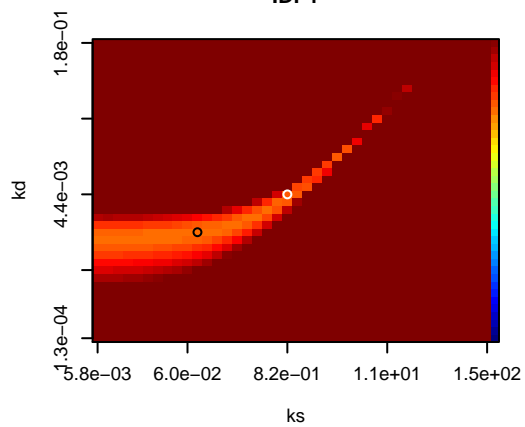

YMR226C

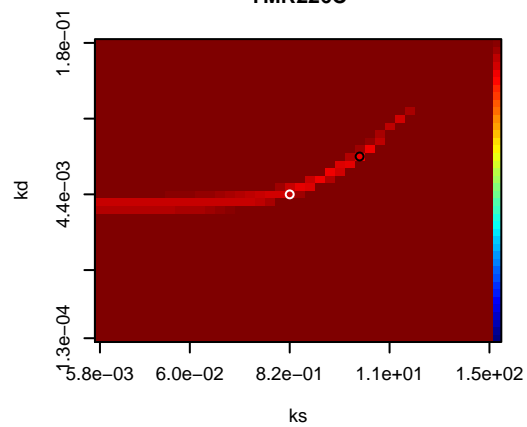

HIS7

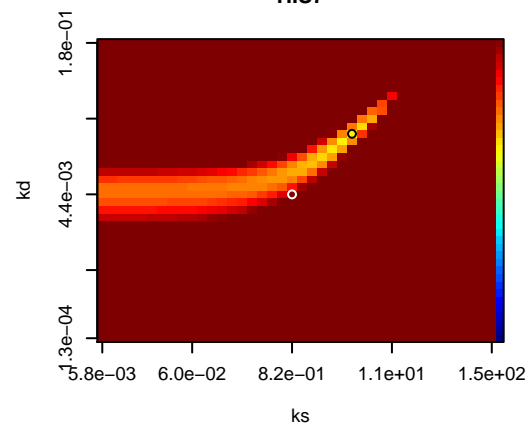

RPL27A

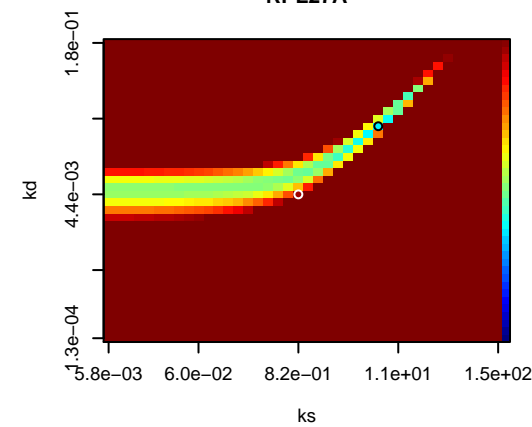

HTA2

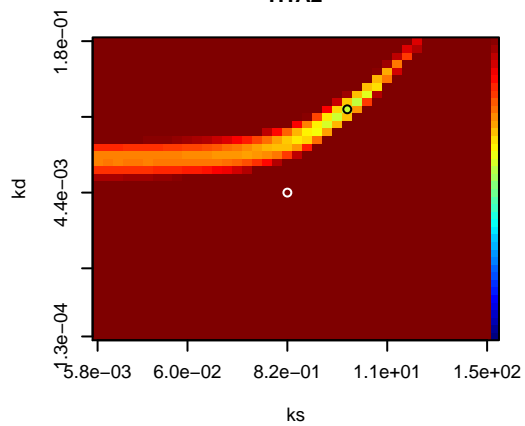

ADE3

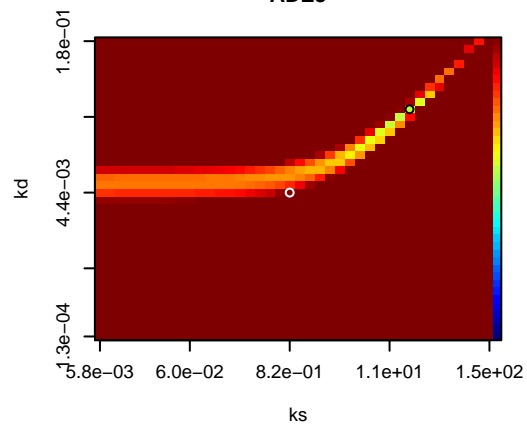

RPL33A

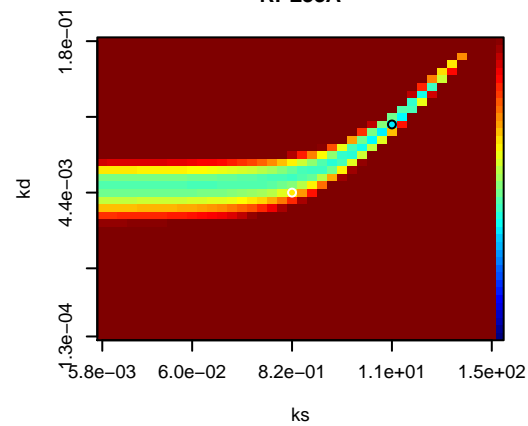

ARO8

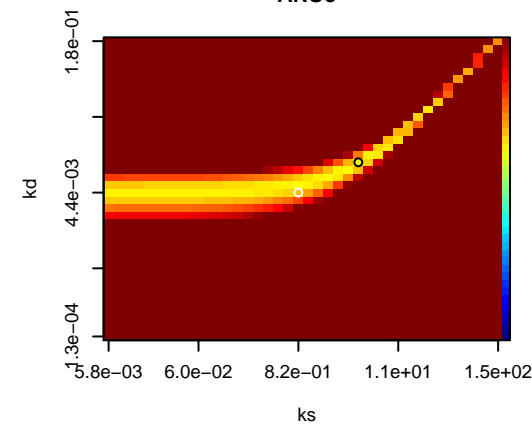

POL30

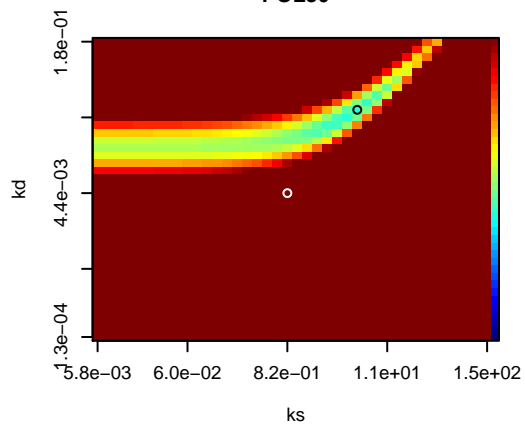

URA4

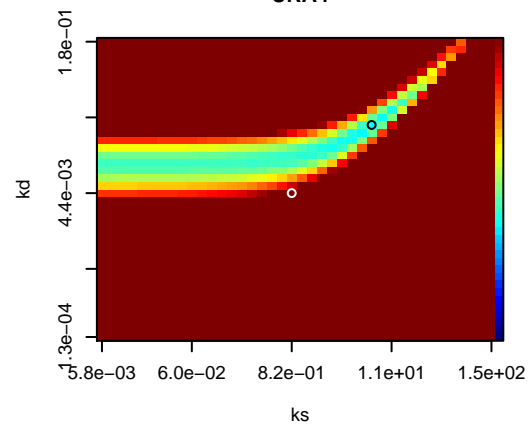

ARG1

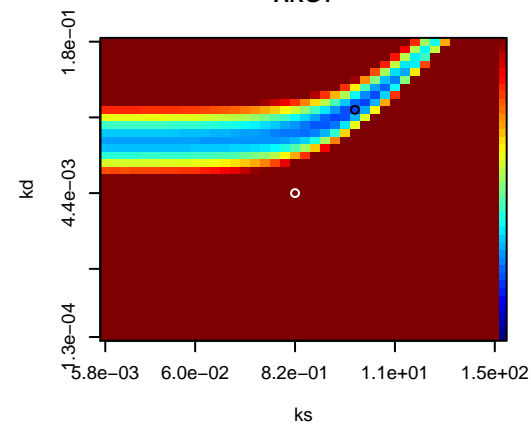

RPL32

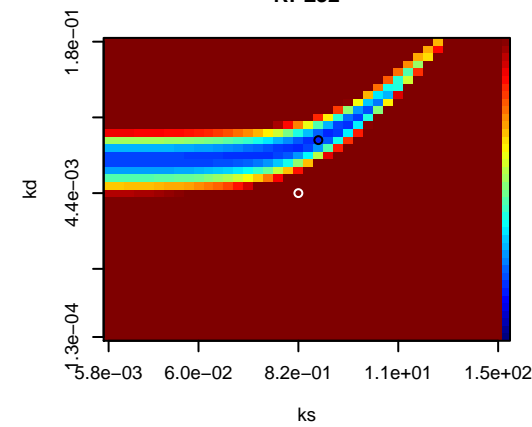

RPL22A

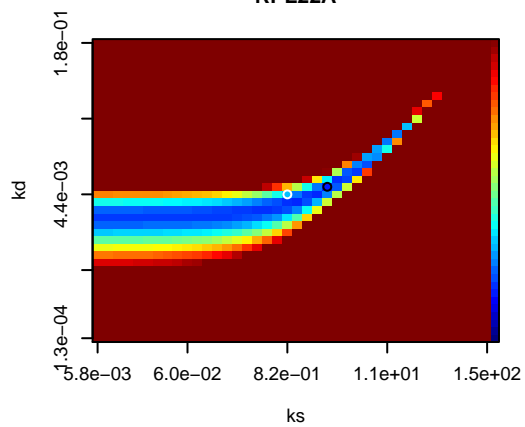

RPL15A

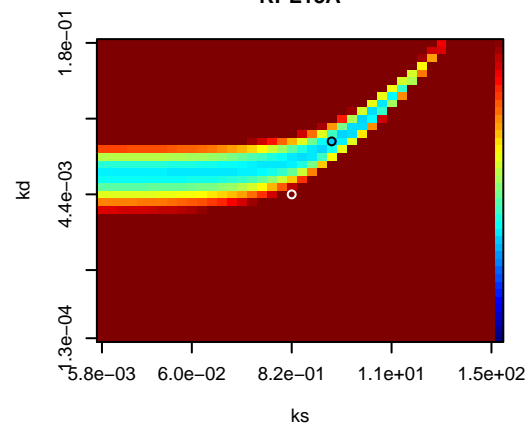

RPL38

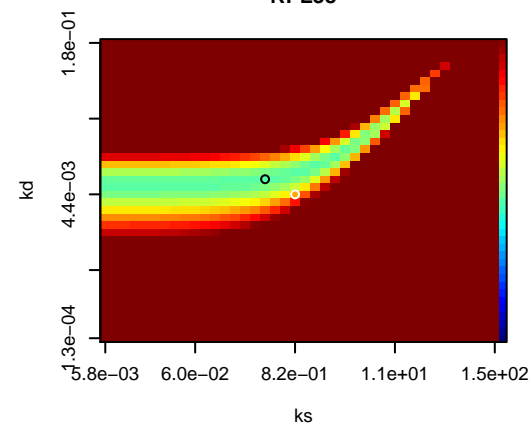

CPR5

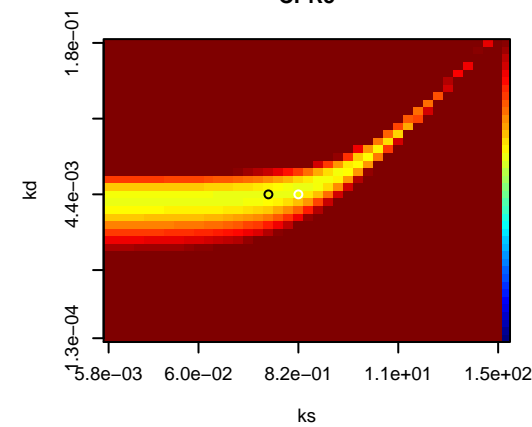

YEF3

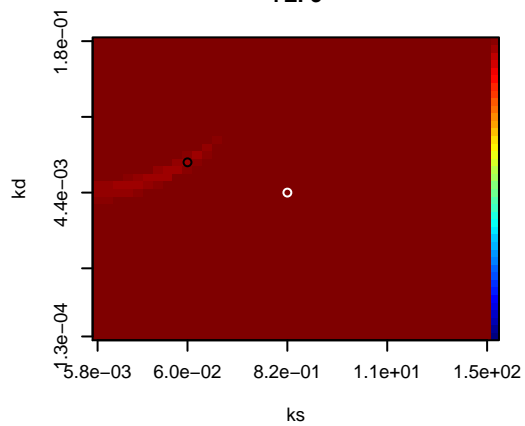

RPL7A

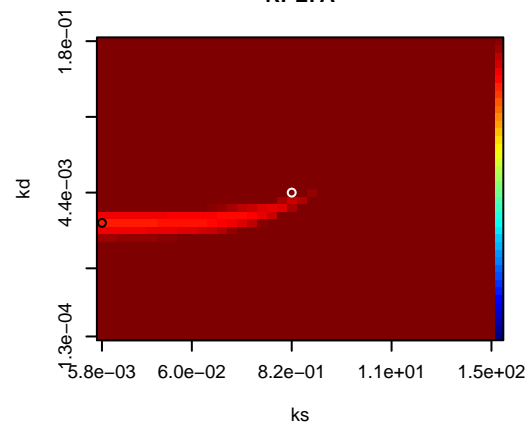

RIB4

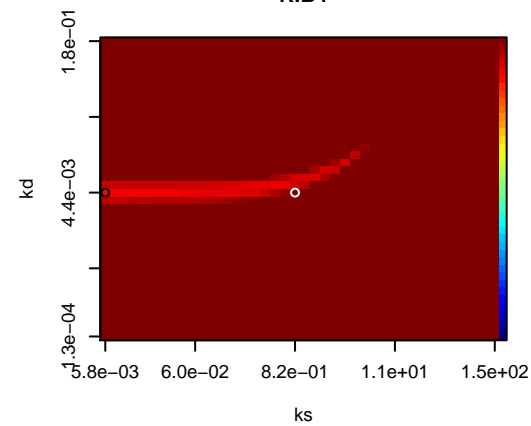

GDH1

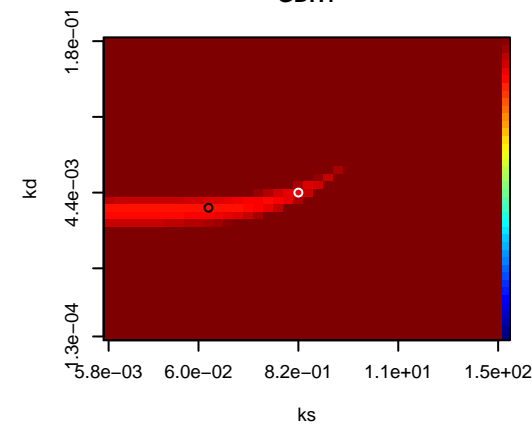

NOG1

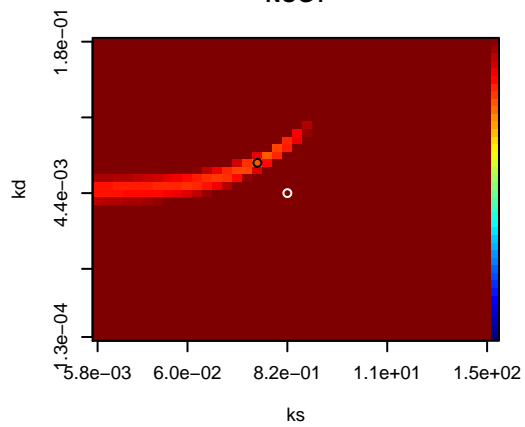

PAA1

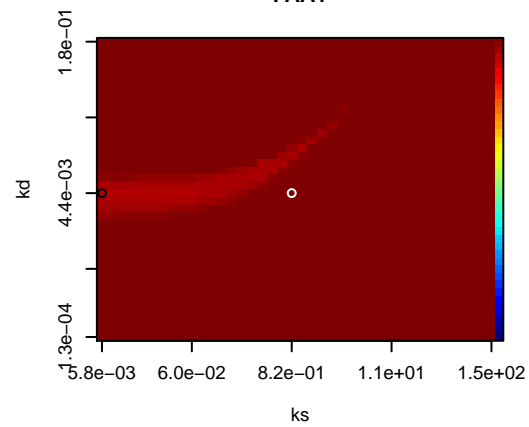

FRS1

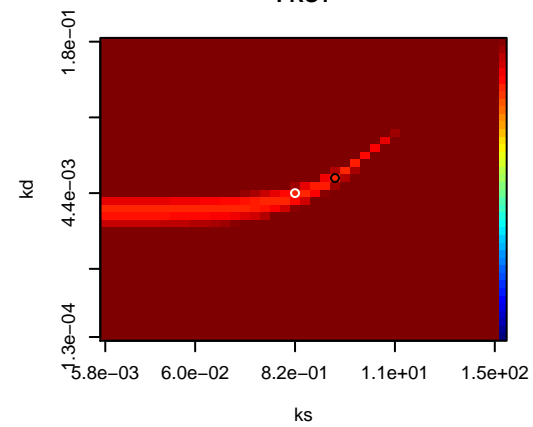

ILS1

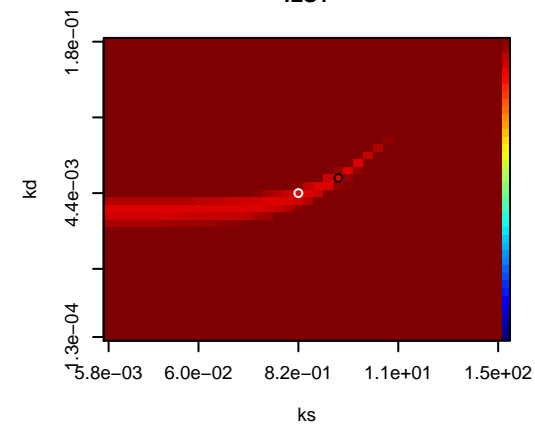

MRT4

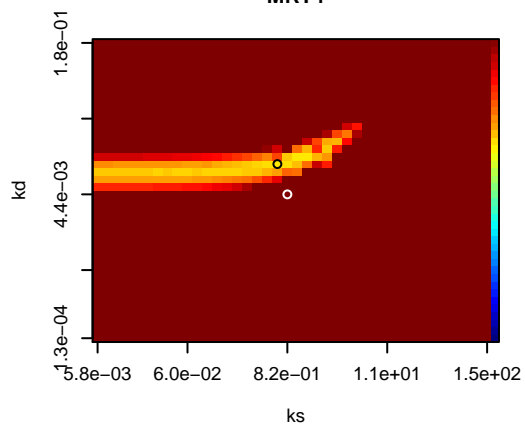

IMD3

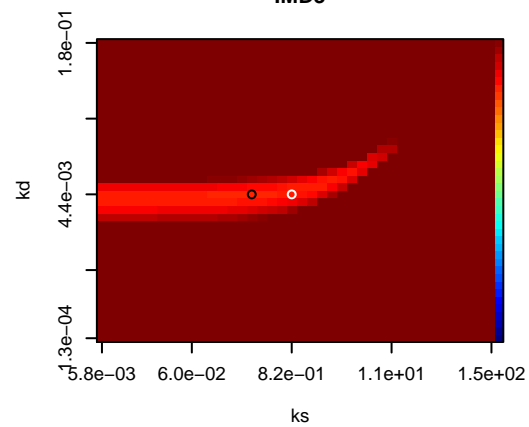

PHO3

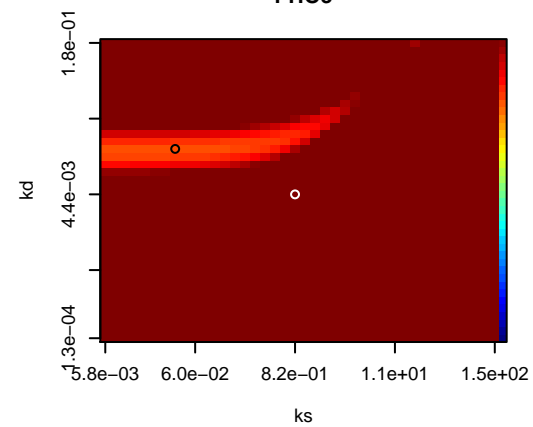

RPS10A

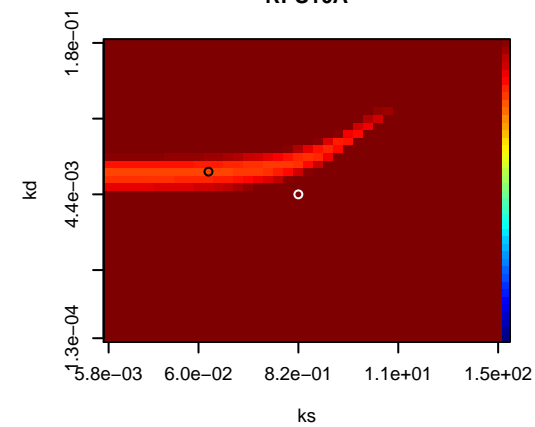

ALA1

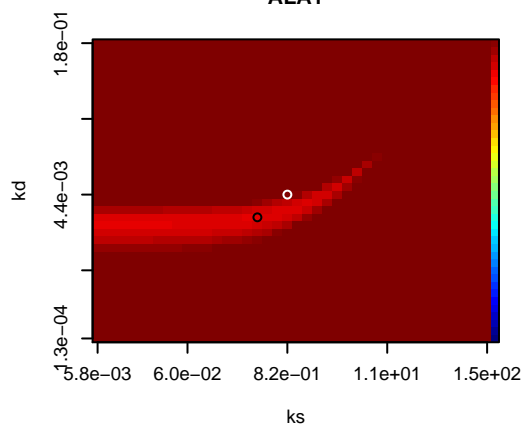

ILV3

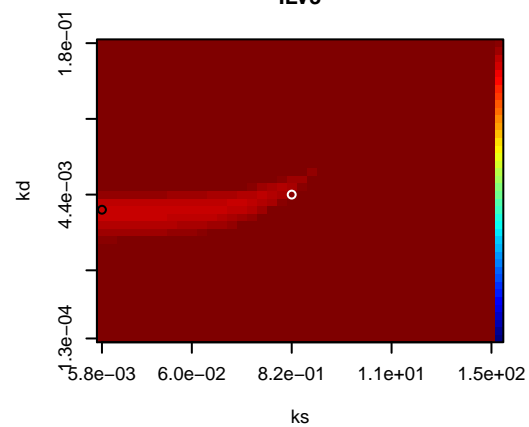

RPS23A

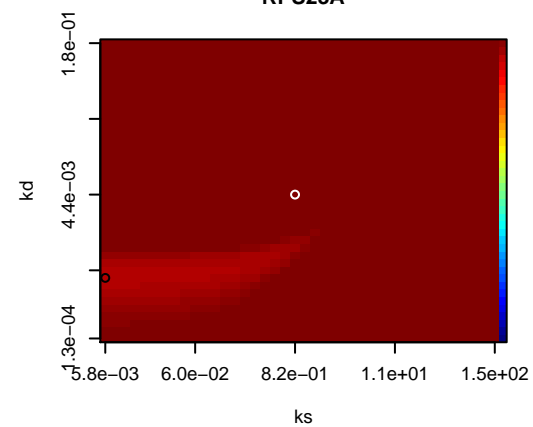

RHR2

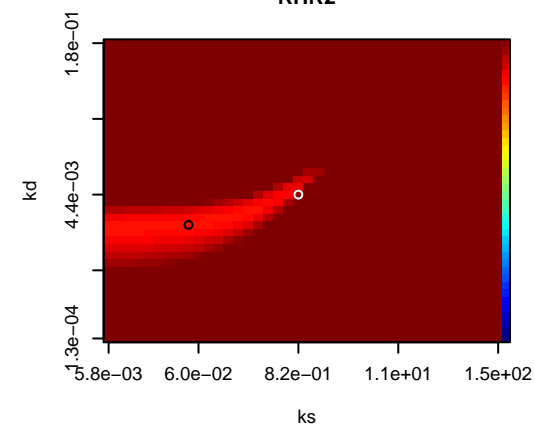

RPP2A

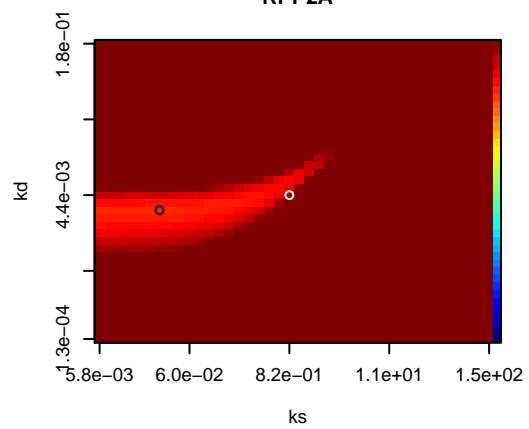

Supplement: c4mb00358f2.zip [file c4mb00358f2.zip]
