# Supplementary material for: One third of dynamic protein expression profiles can be predicted by a simple rate equation
Source: Royal Society of Chemistry journal article supplement (doi:10.1039/c4mb00358f), 2014-08-01

OSM1

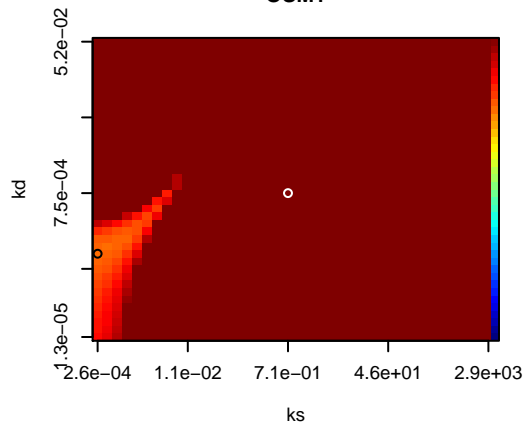

STT3

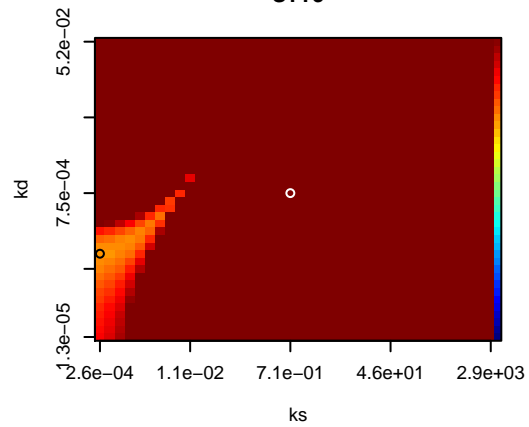

CHO2

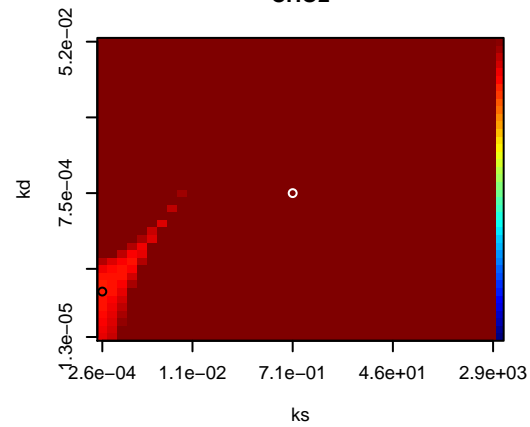

SCS2

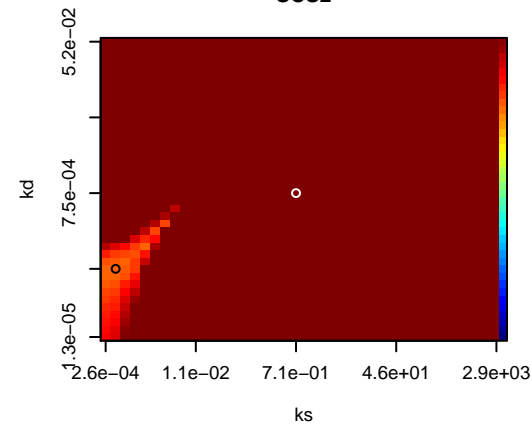

SPF1

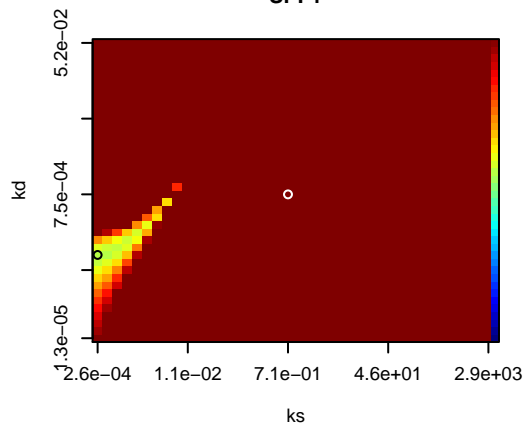

RPL26B

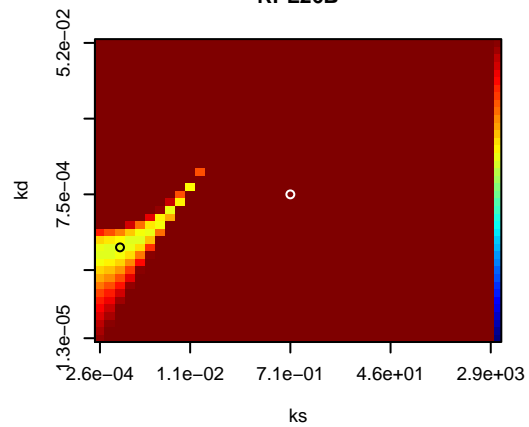

SNU114

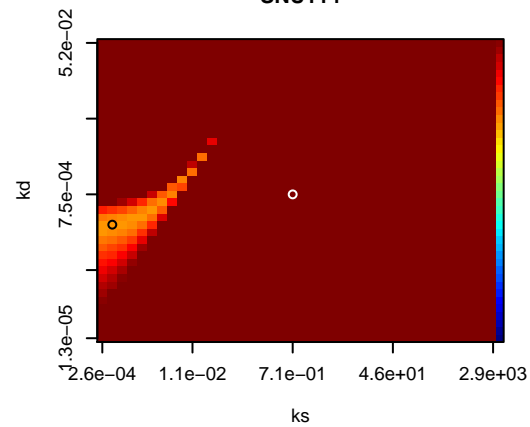

AIM29

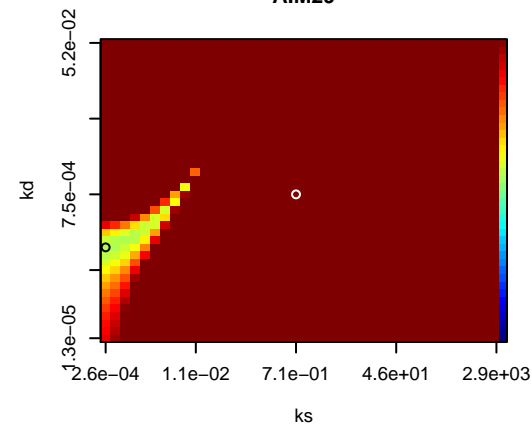

PAN5

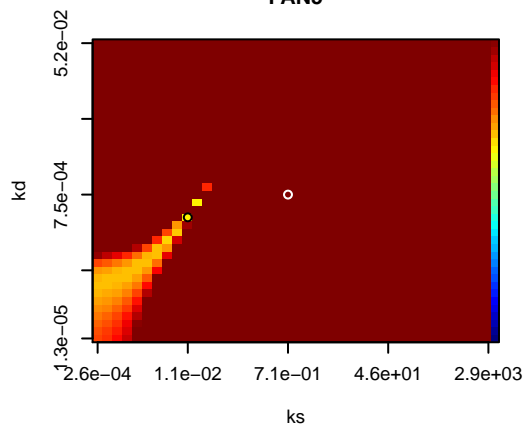

SFH5

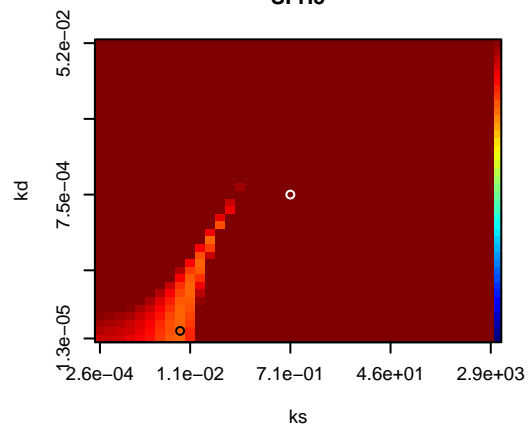

RPL14B

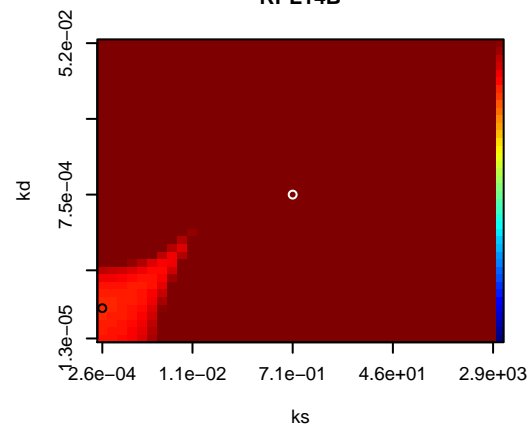

FEN1

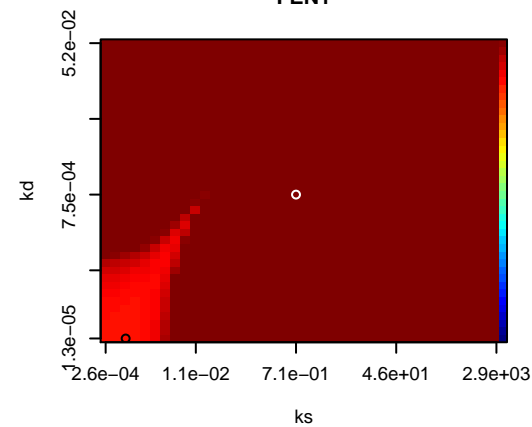

PNP1

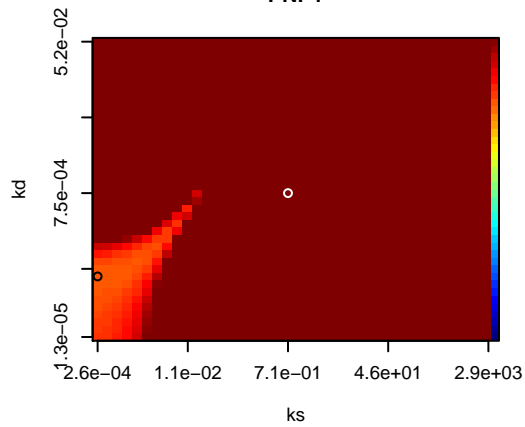

TIM50

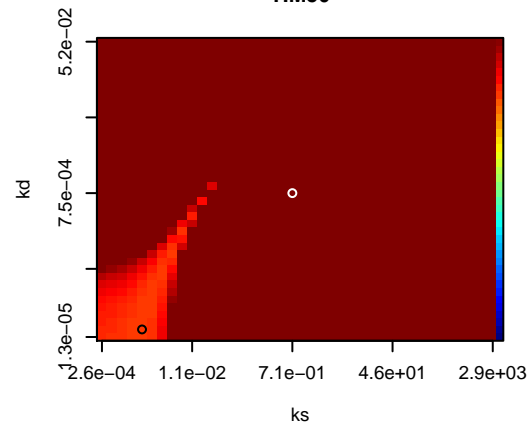

NUP170

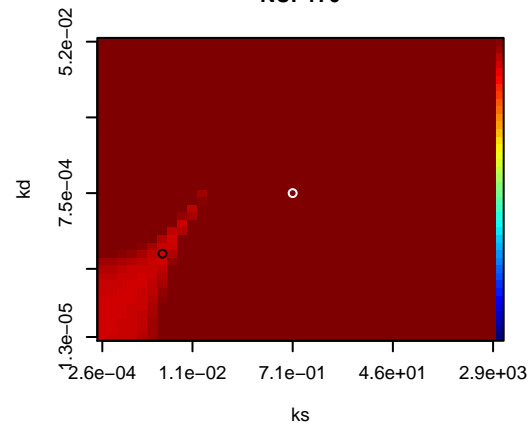

MET22

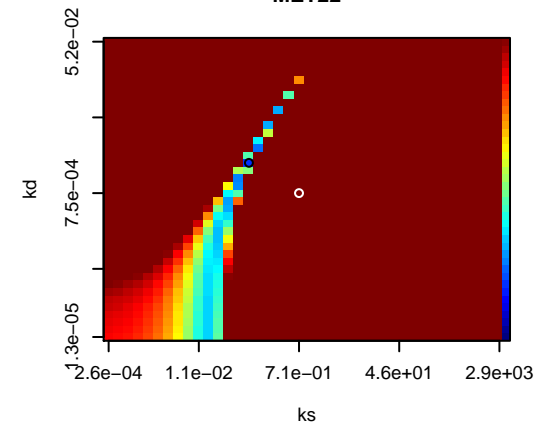

IMD3

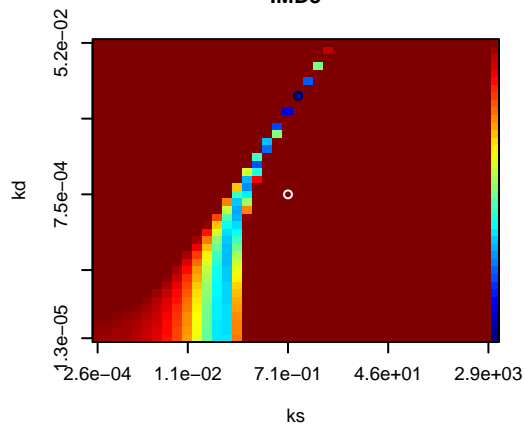

MTC1

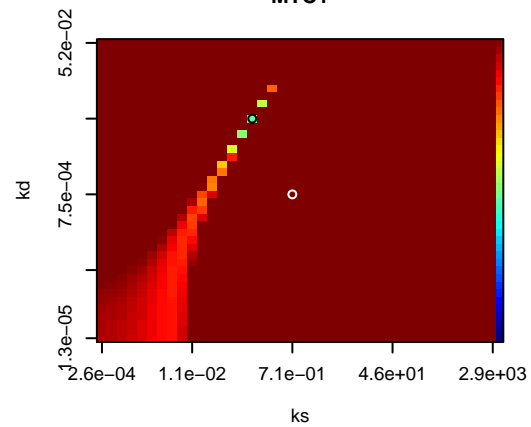

TOM20

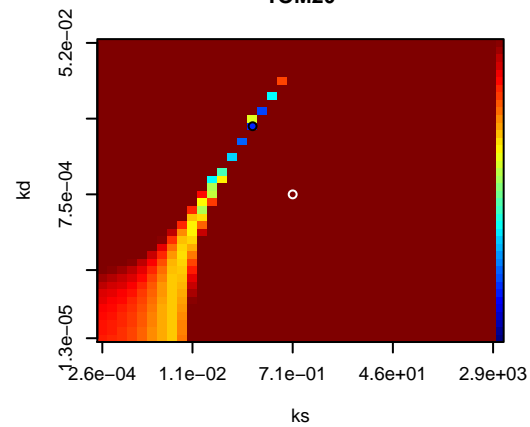

CYC8

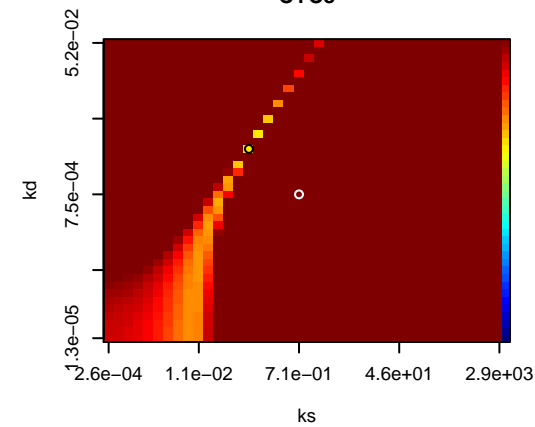

TED1

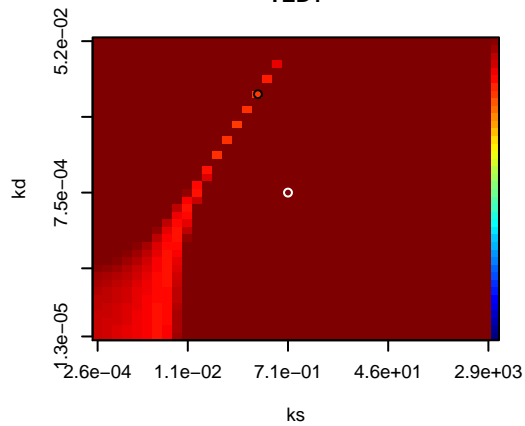

RFA3

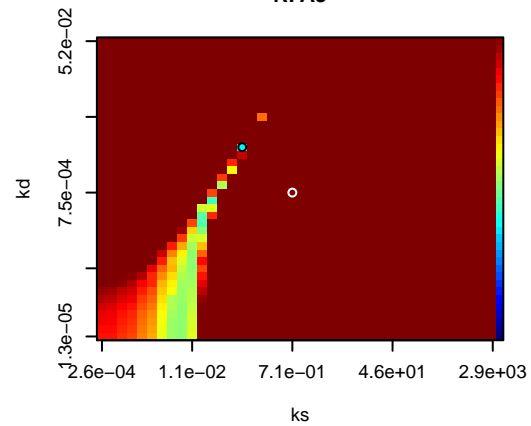

LYS4

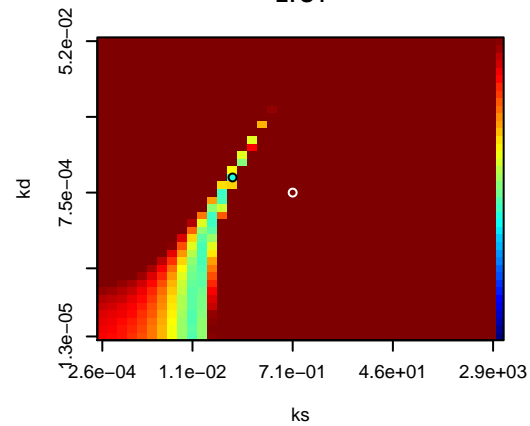

SUP45

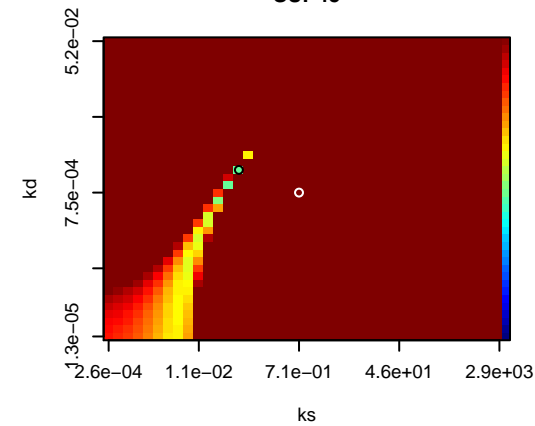

LYS12

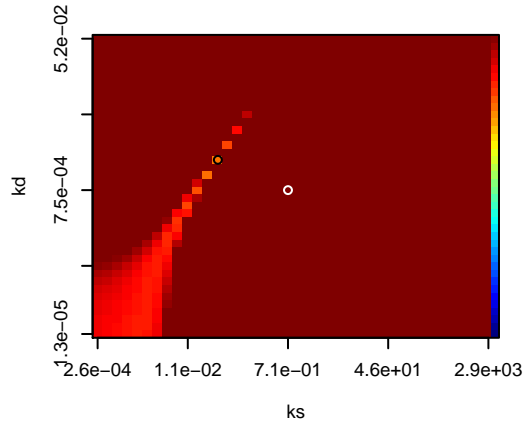

VMA7

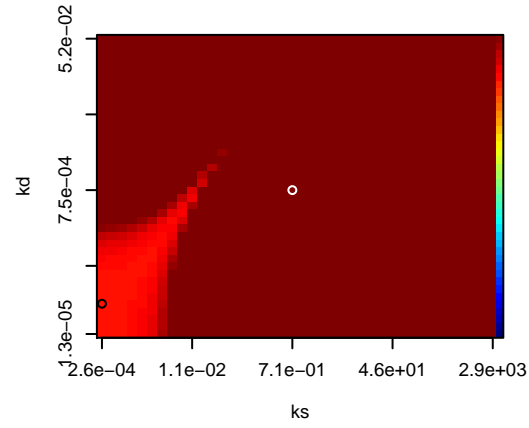

RPO26

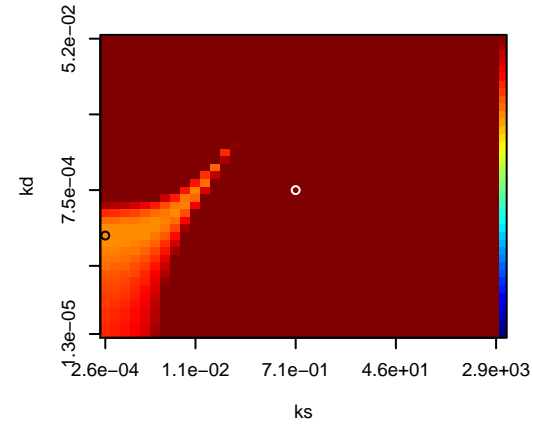

MZM1

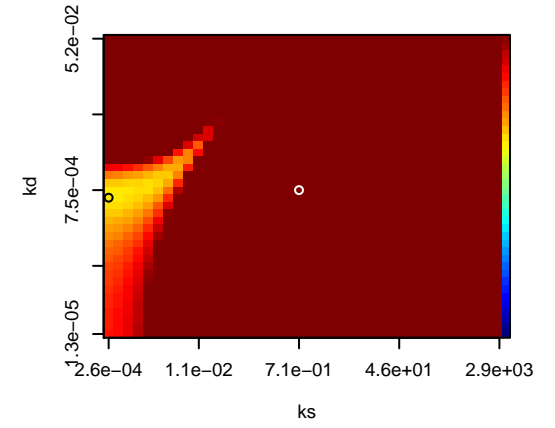

SMC4

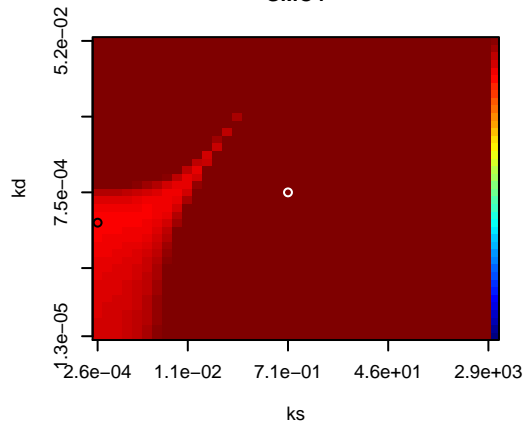

IMD2

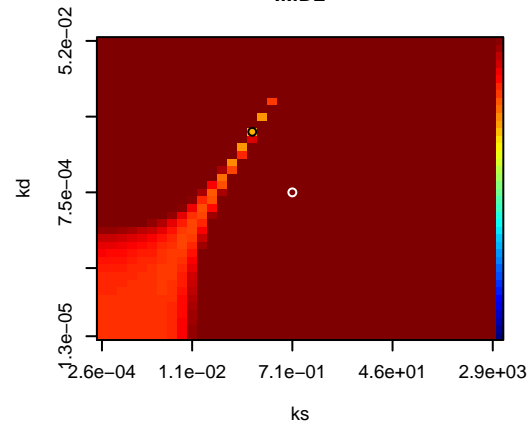

RTT102

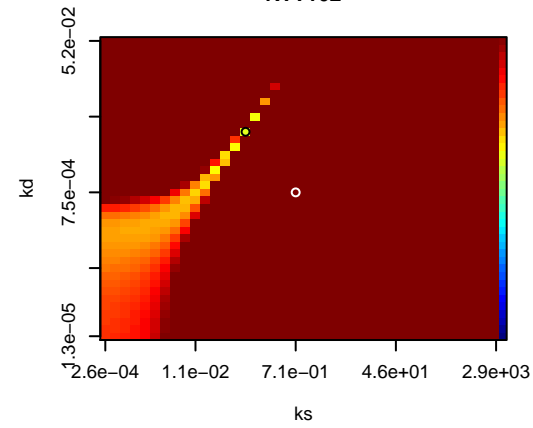

RGD2

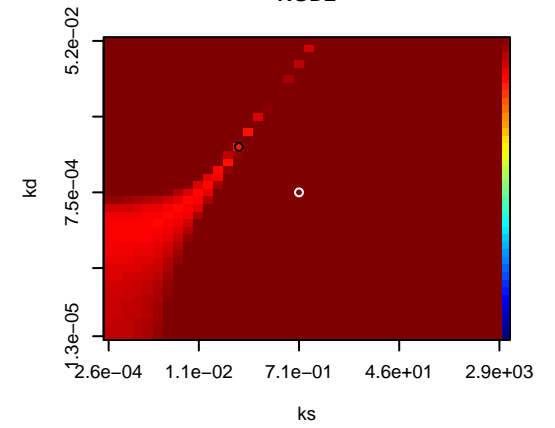

APA1

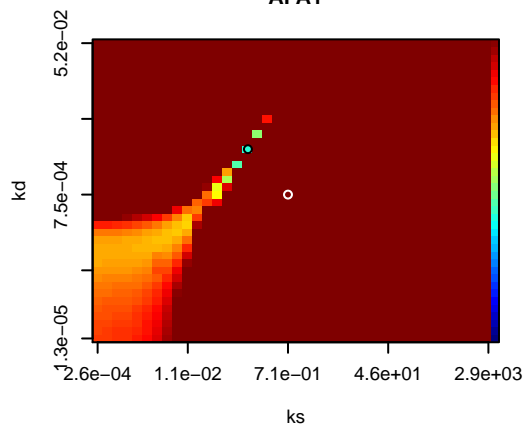

THI80

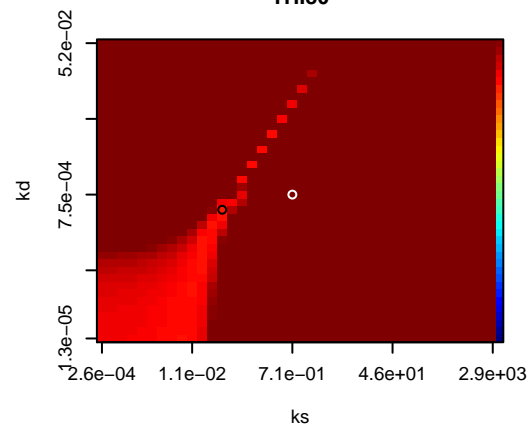

DOM34

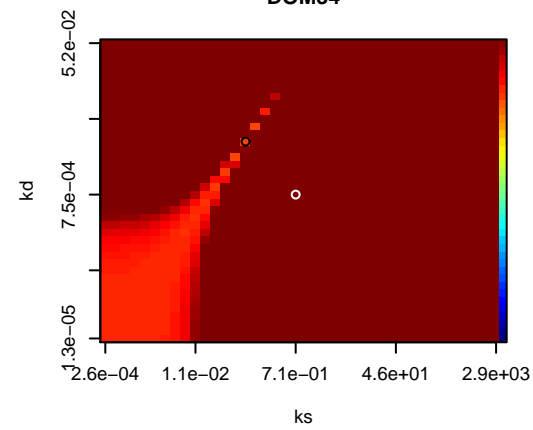

YKL027W

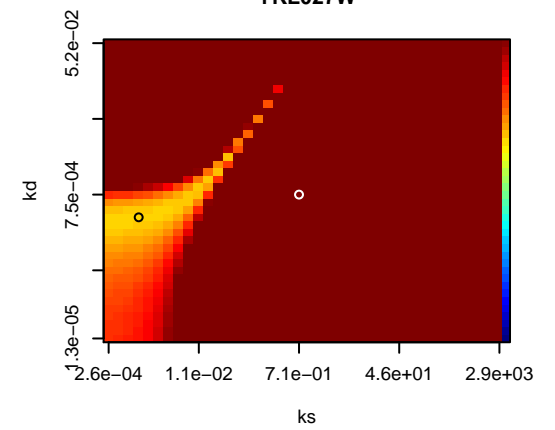

YRA2

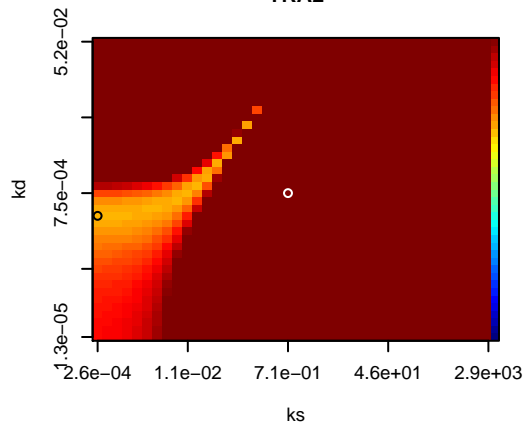

BPL1

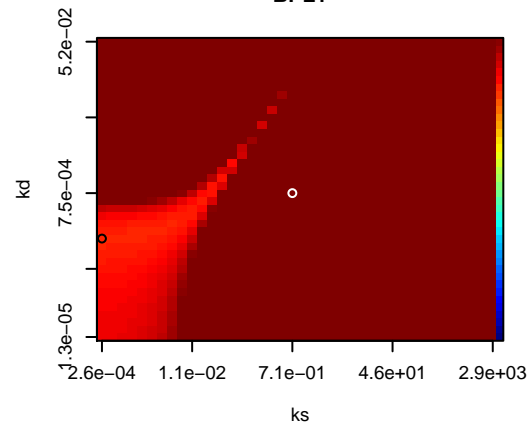

YGR017W

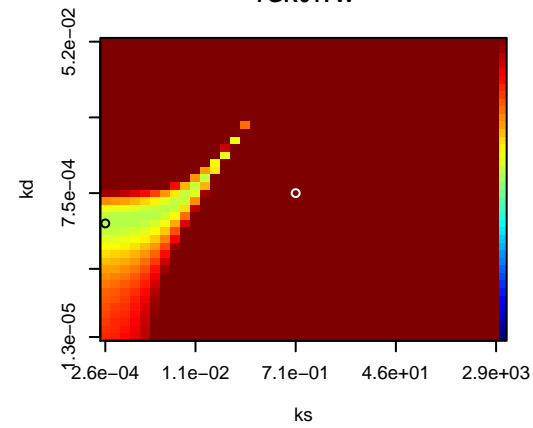

YCR016W

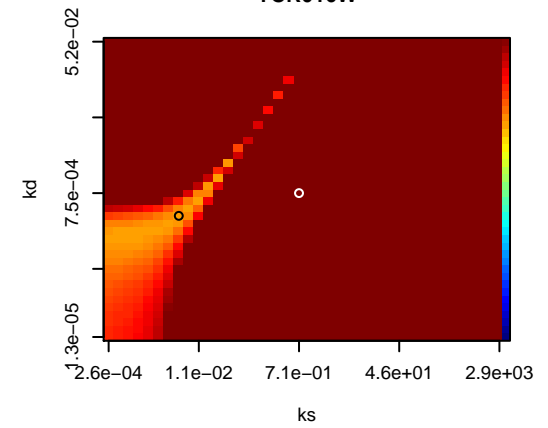

RDH54

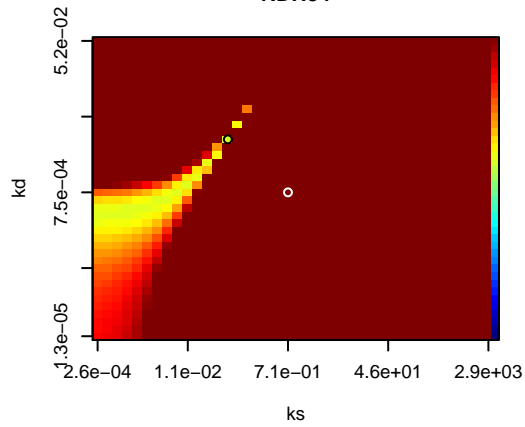

KRE2

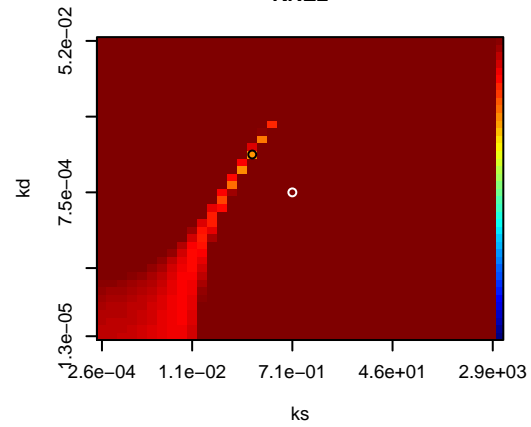

TOM71

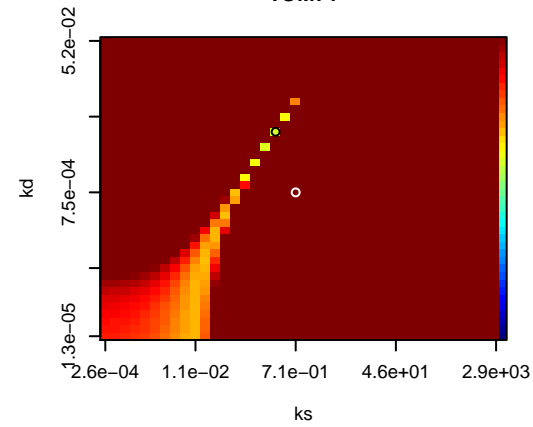

TUB3

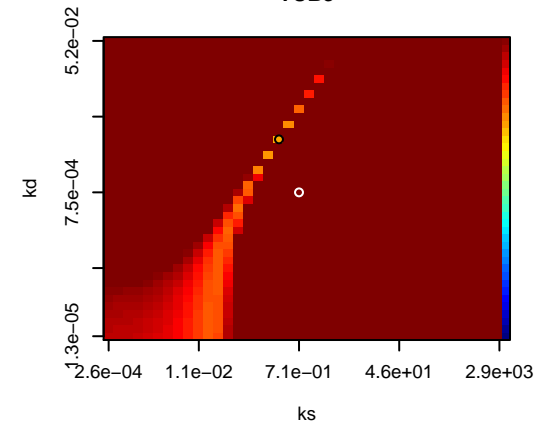

OPY2

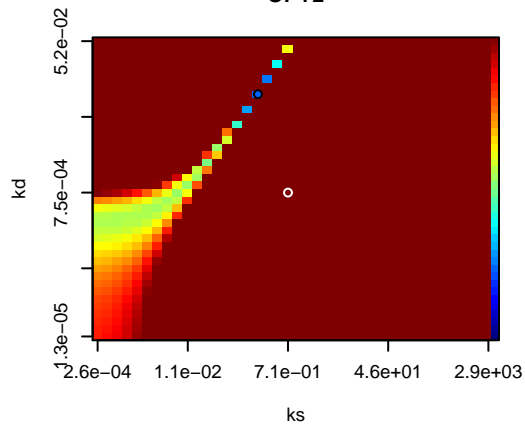

FAA3

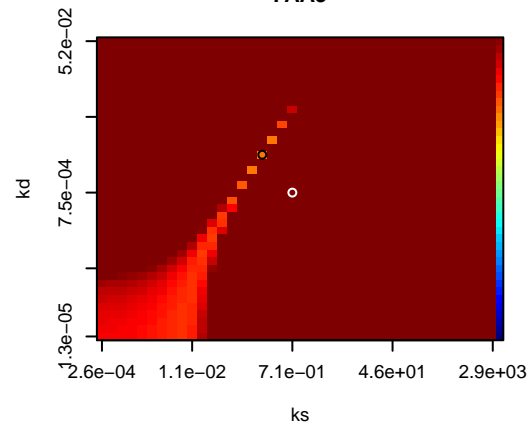

ILS1

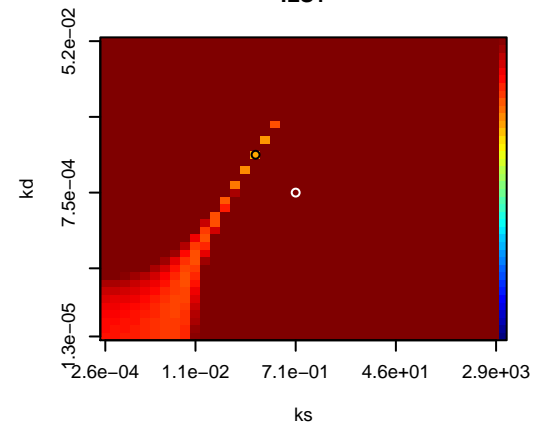

UTP22

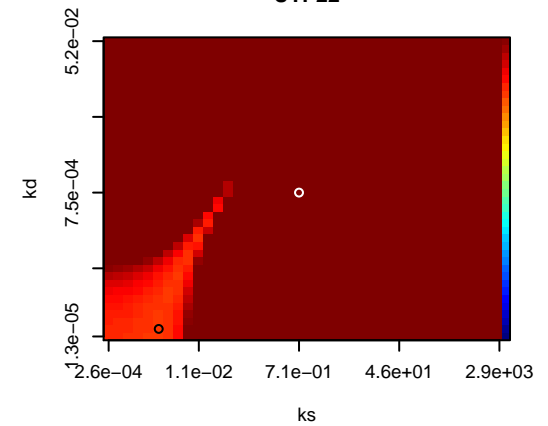

**SUI2**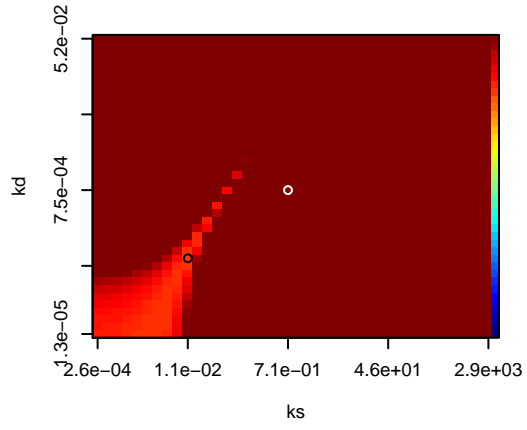**CCT4**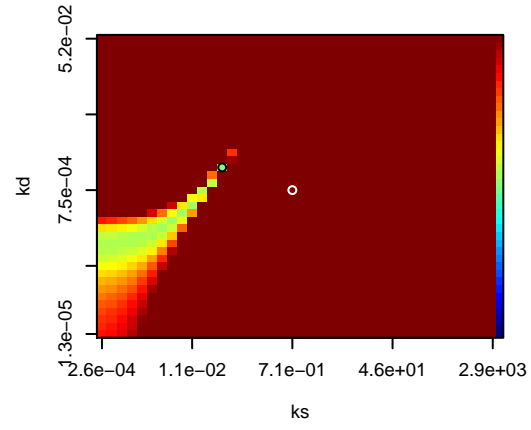**TAN1**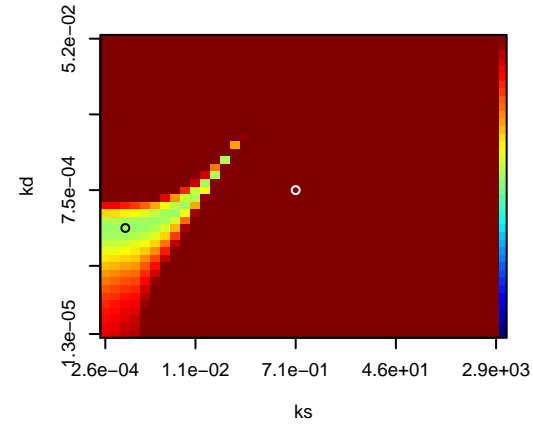**ESS1**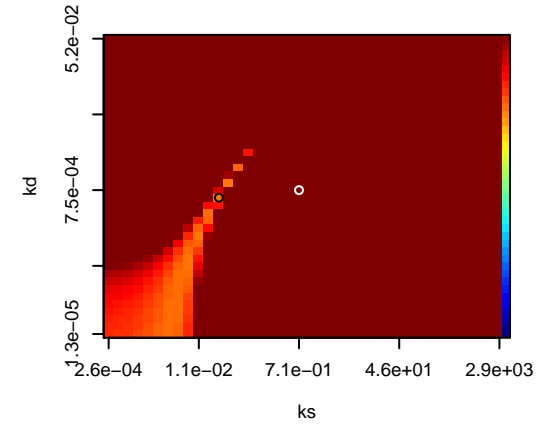**SEY1**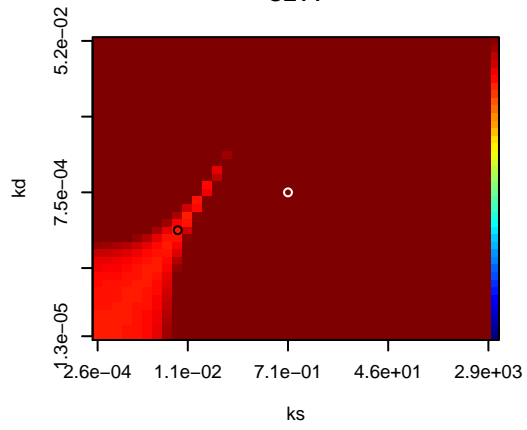**ALO1**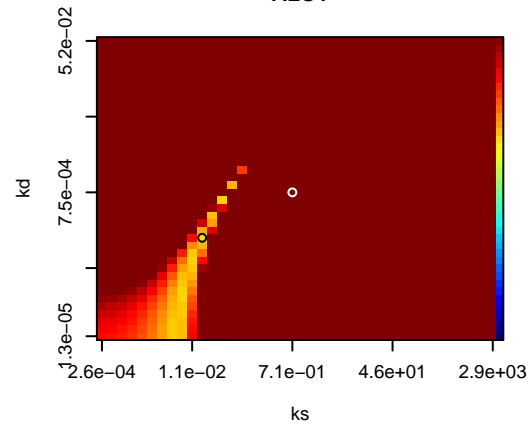**NMA111**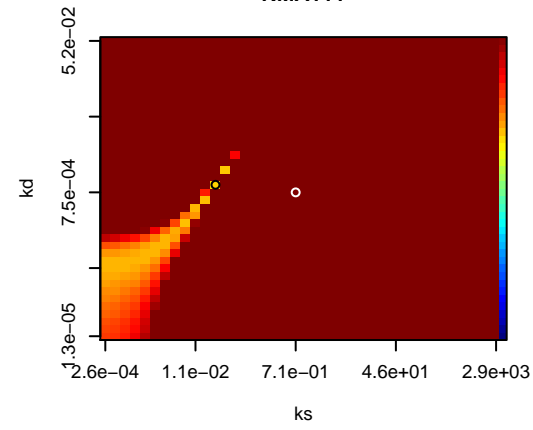**UBP3**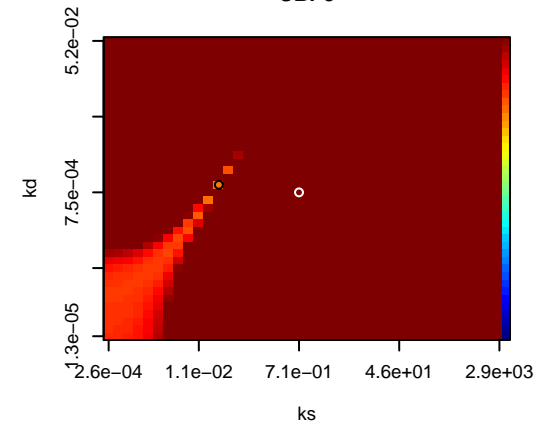**GCN1**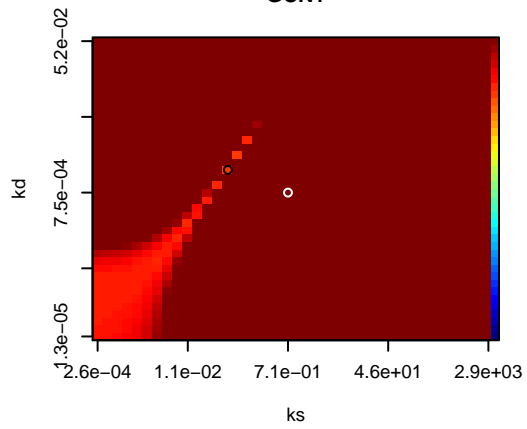**IDI1**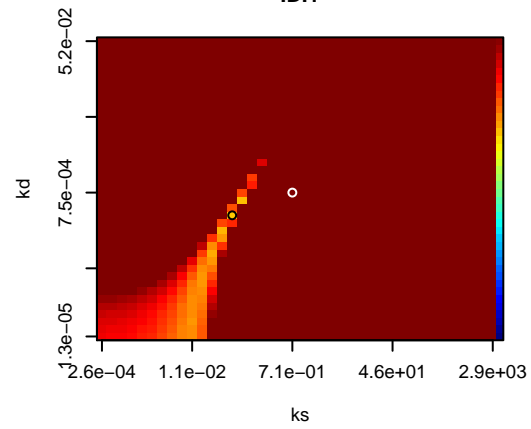**YNL247W**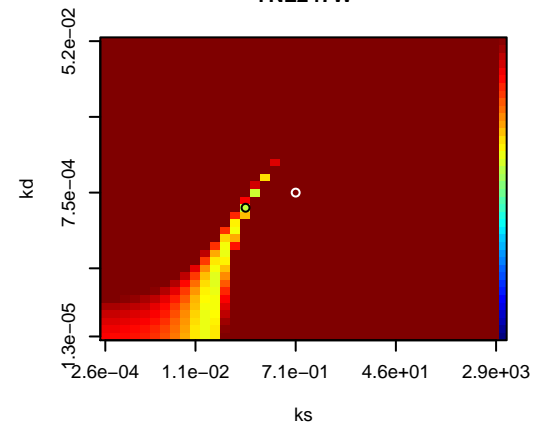**ERG12**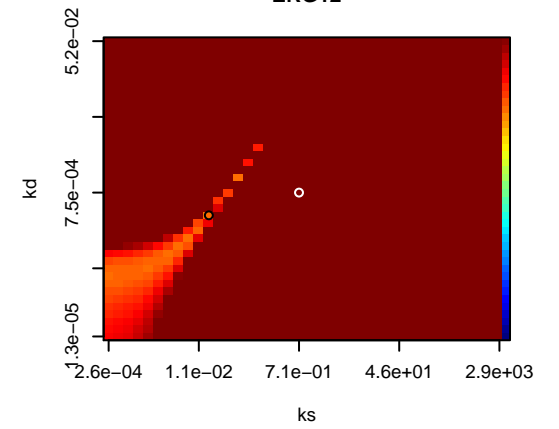

SST2

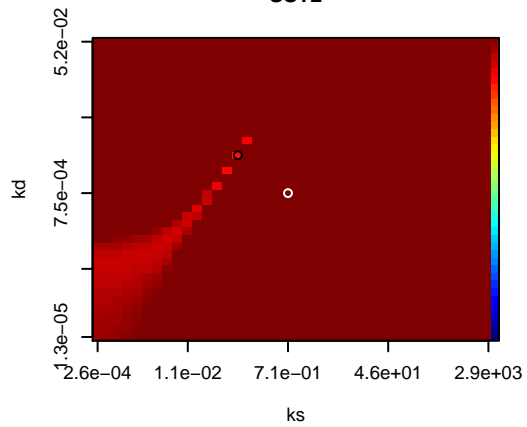

YBL036C

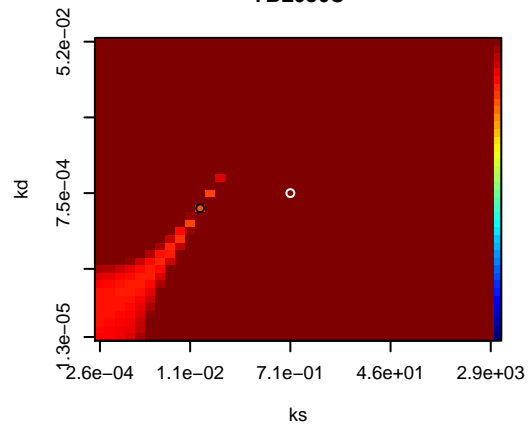

SOK2

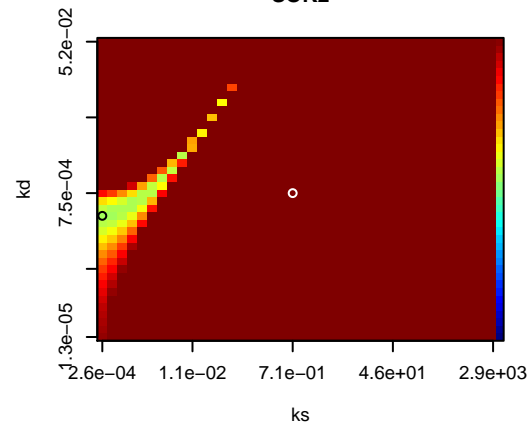

RRP7

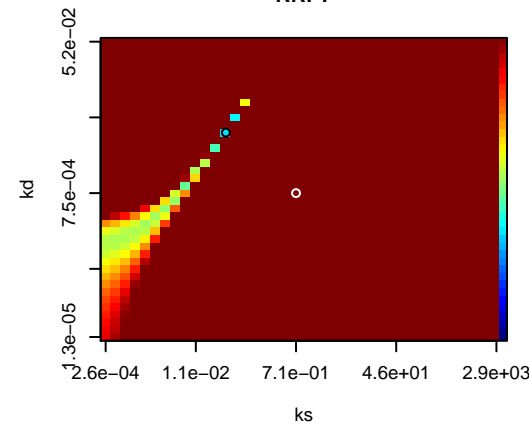

OLA1

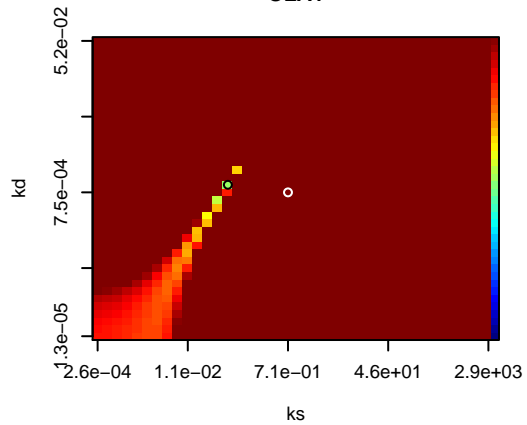

BUG1

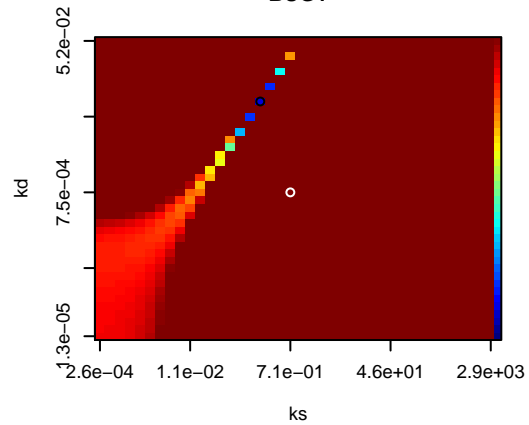

BLM10

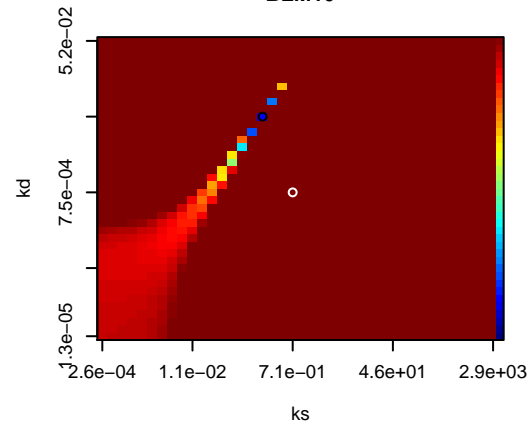

CPR6

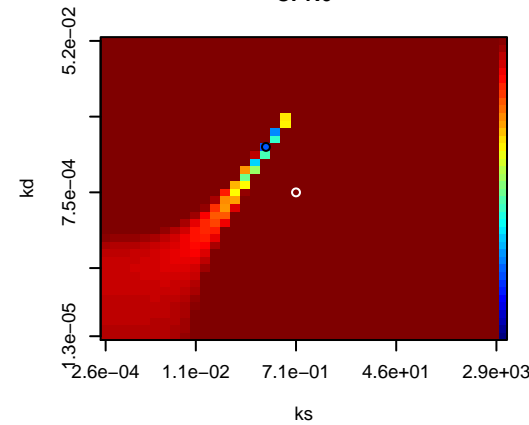

TOP2

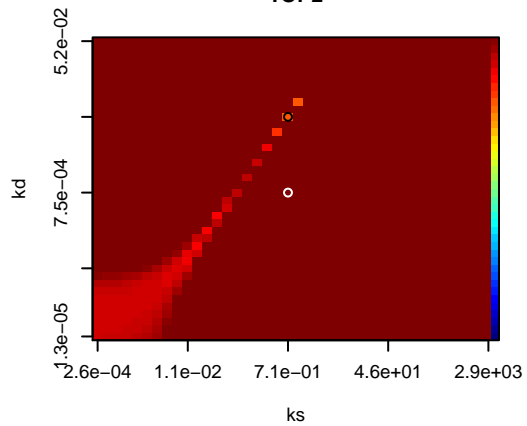

GIM4

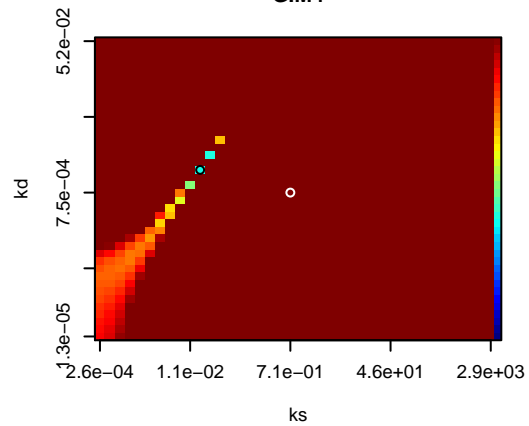

LEO1

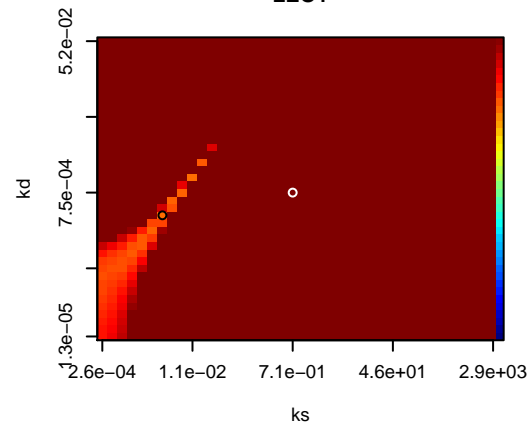

FUN30

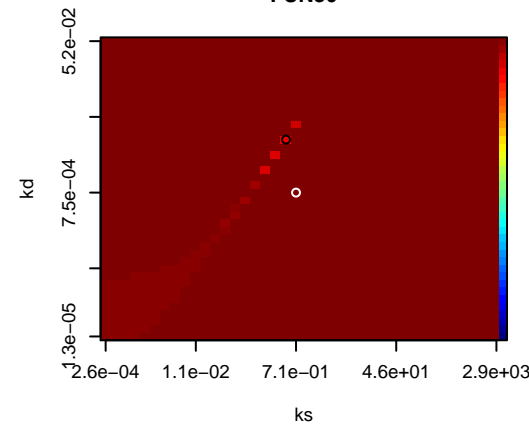

KAP95

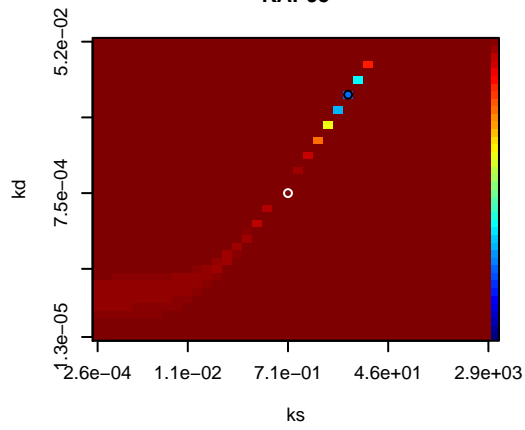

RPA34

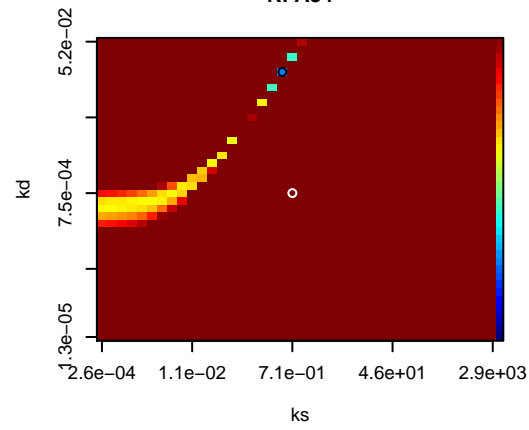

TYW3

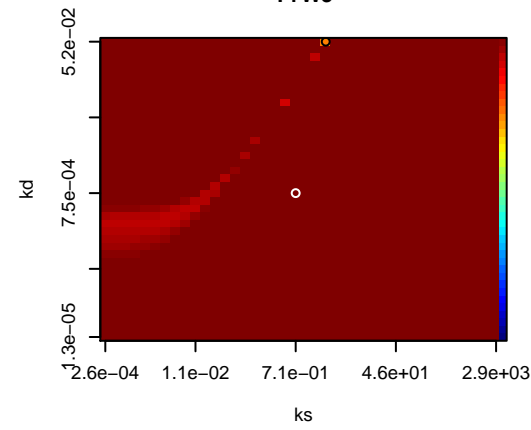

RRP9

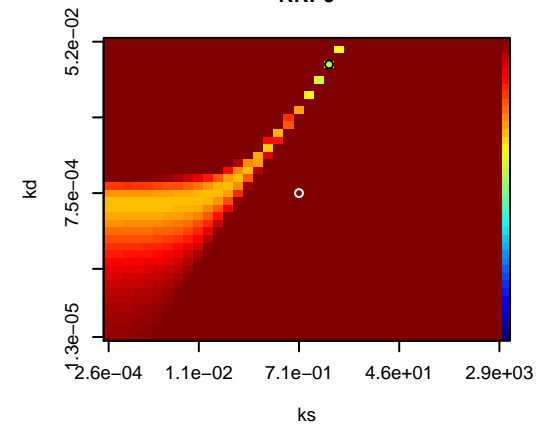

DPH5

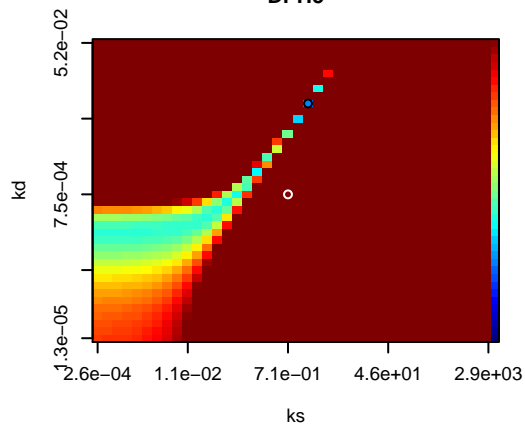

NOP12

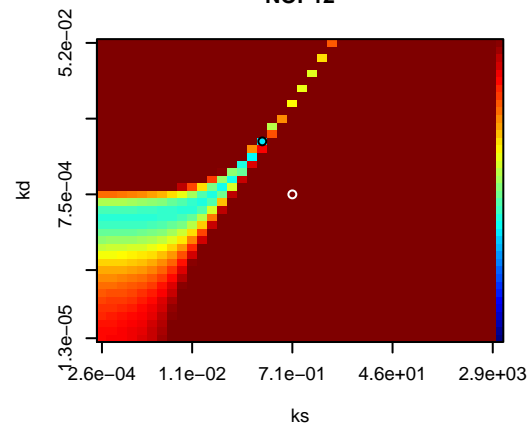

CSR1

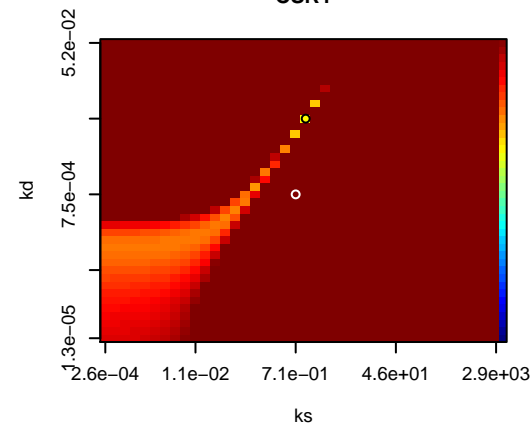

SRP68

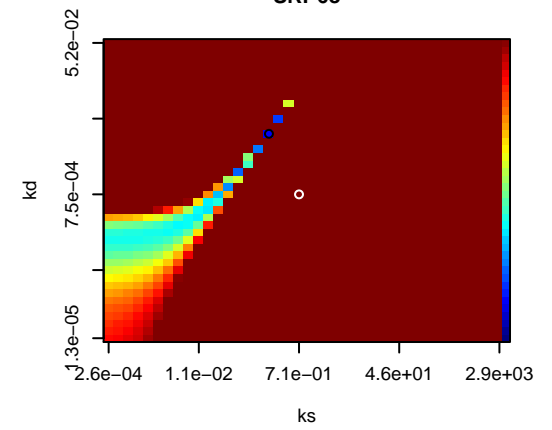

GLN4

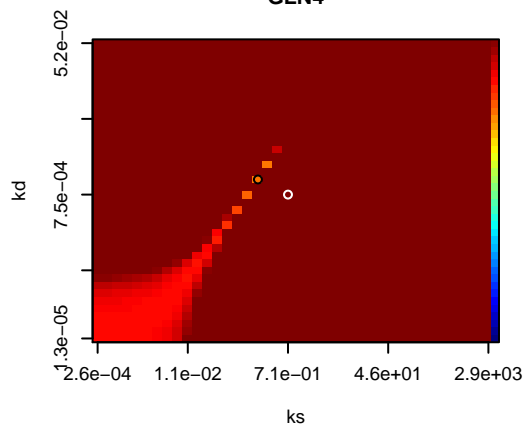

NUP57

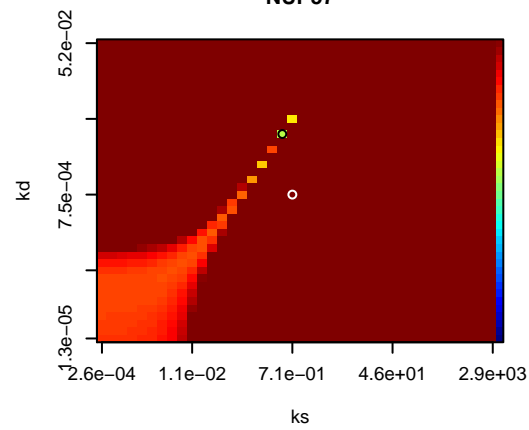

XRN1

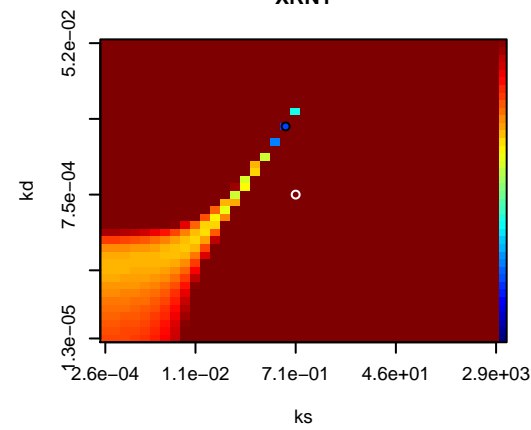

MNN11

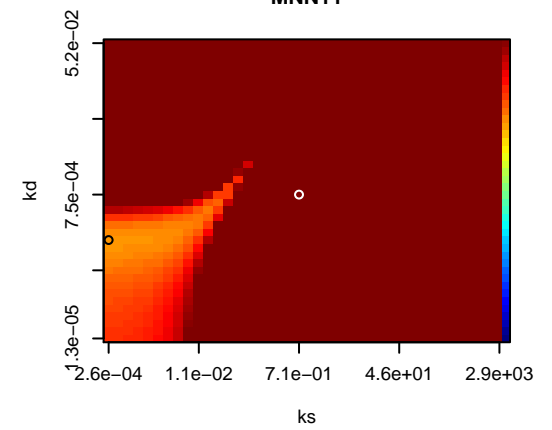

NDC1

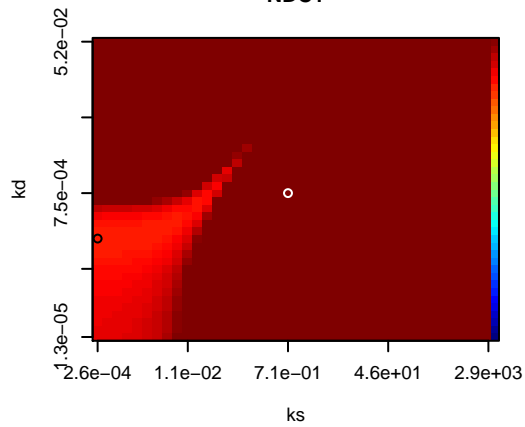

RAD52

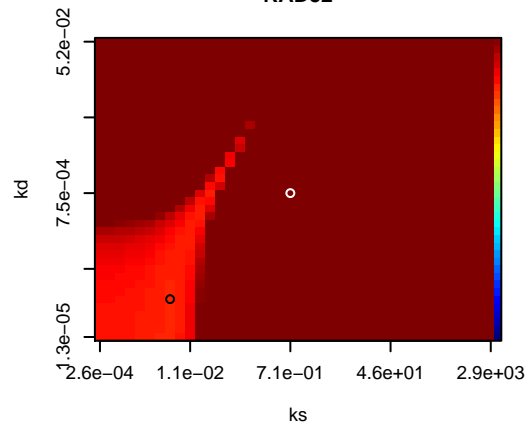

ANT1

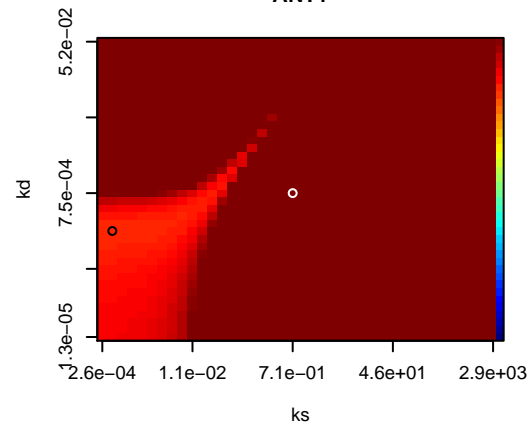

MRN1

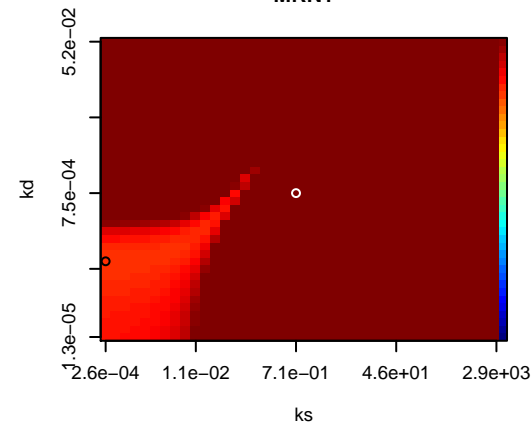

HEK2

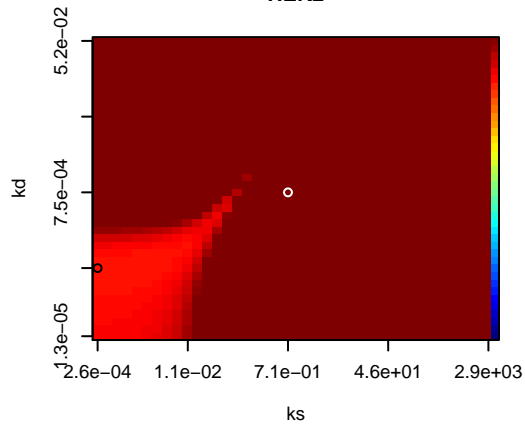

YNR021W

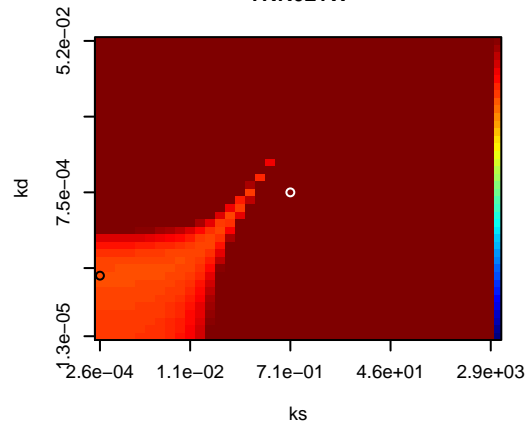

NOG1

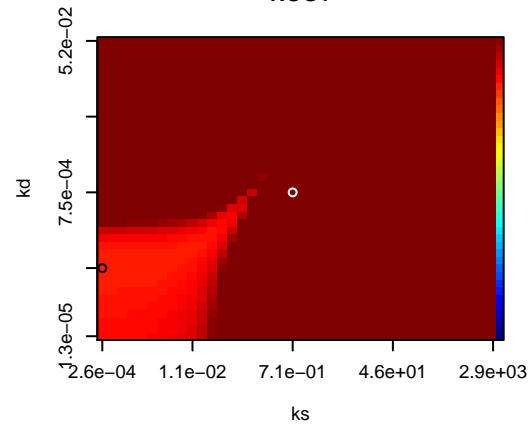

WHI3

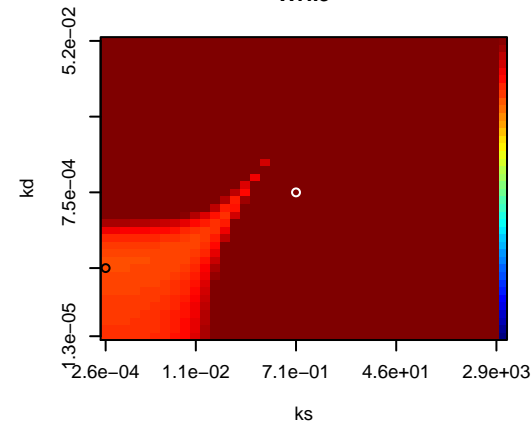

NUP159

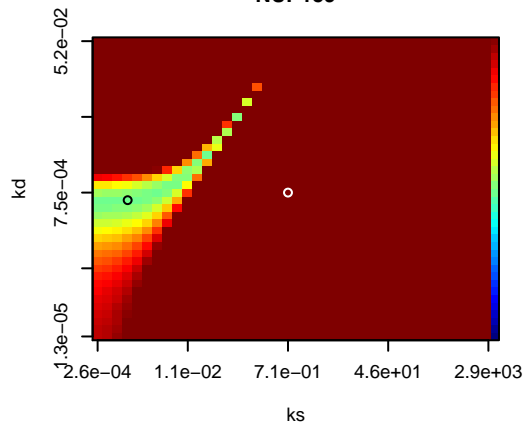

HOM6

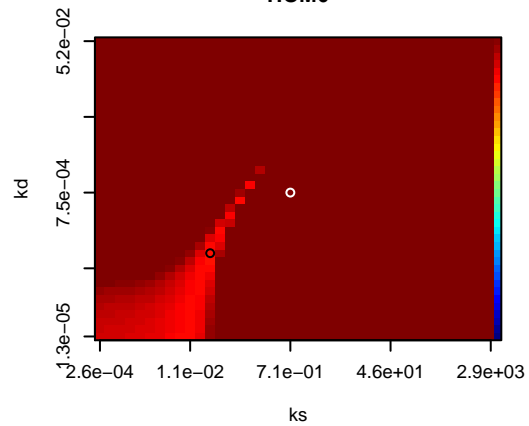

UBC9

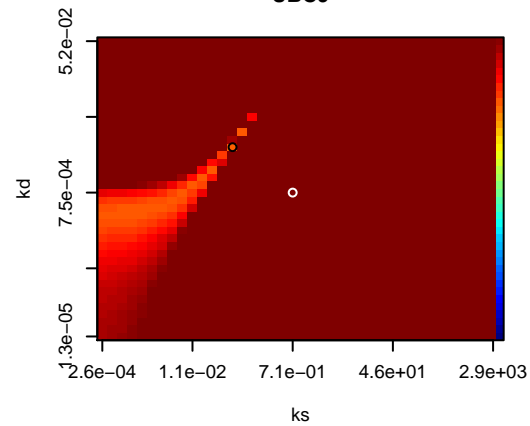

ELP2

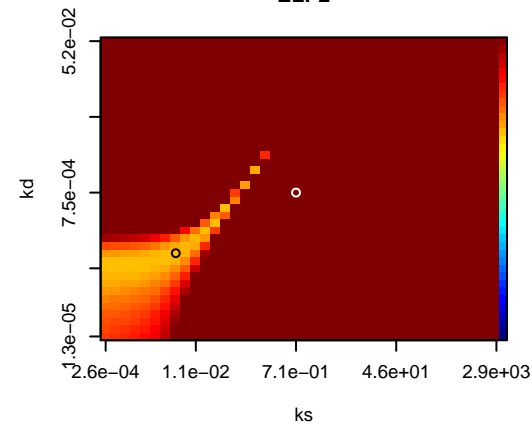



CLU1

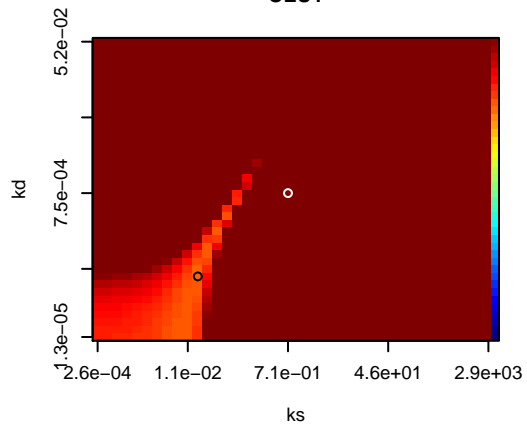

RRP17

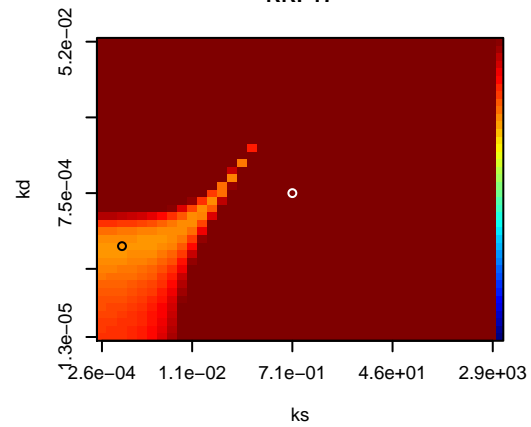

RPL7A

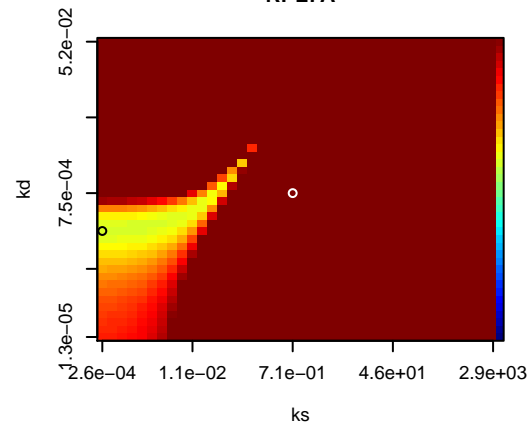

SWI3

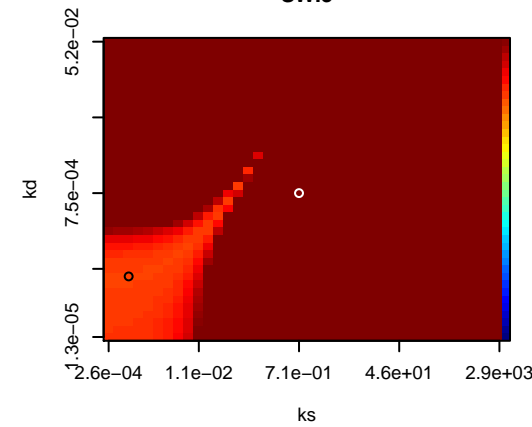

SOL3

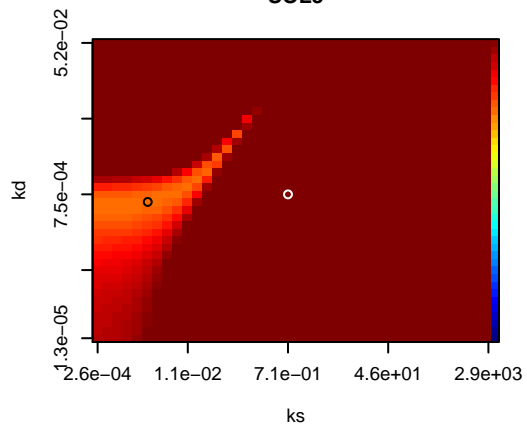

RTT10

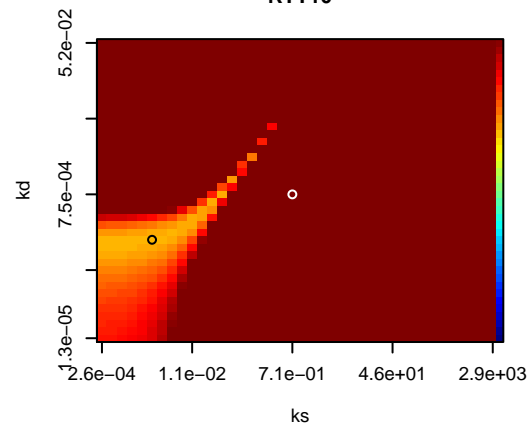

BUD23

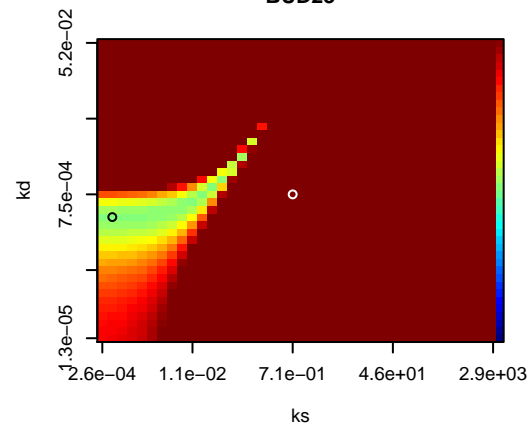

KRR1

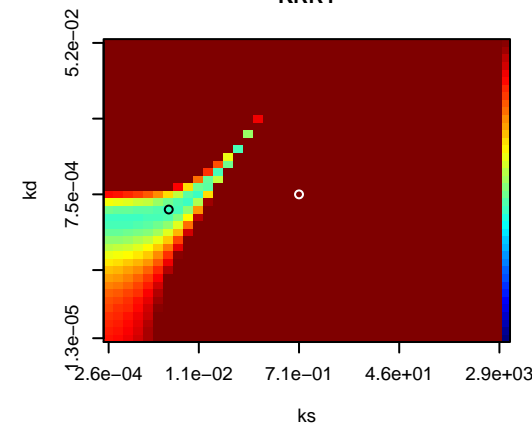

ARD1

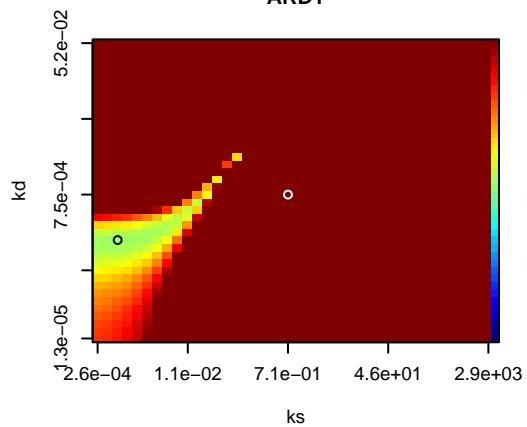

OST1

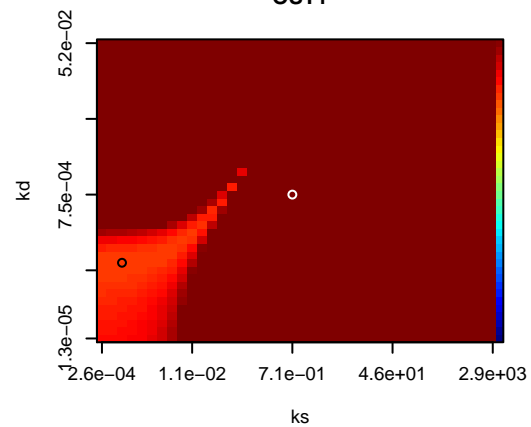

SCJ1

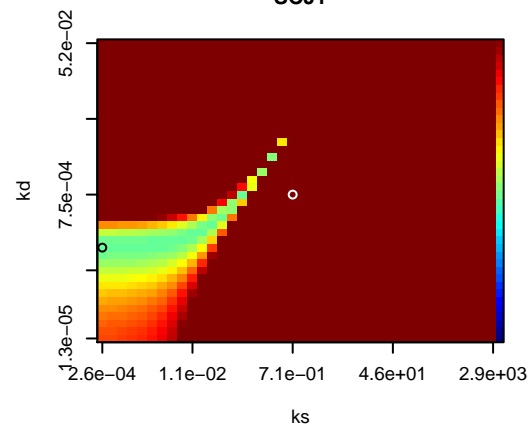

SRP72

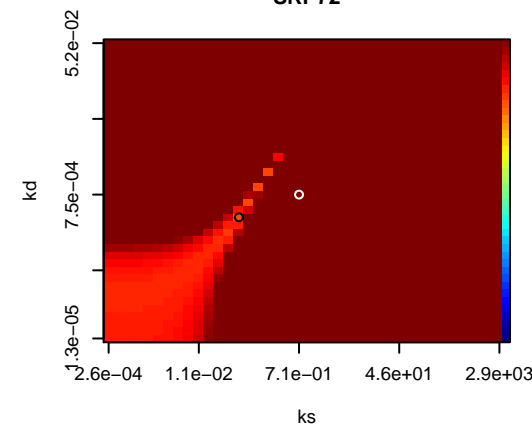

MSH6

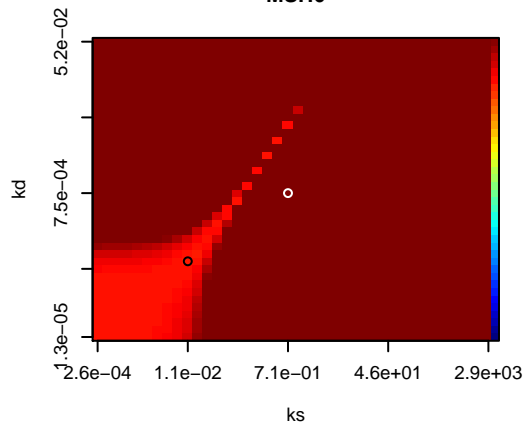

RNA1

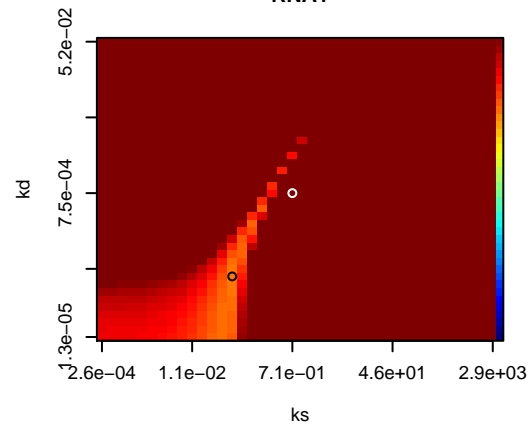

BRE5

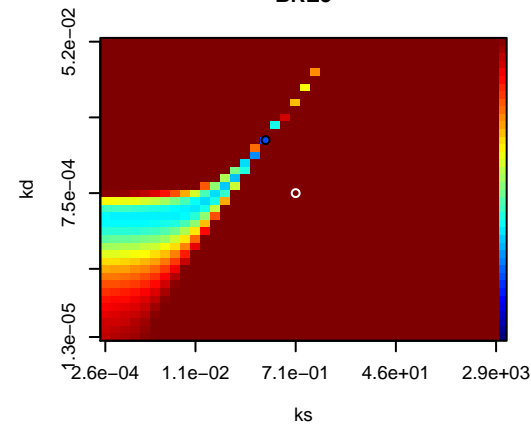

RVB1

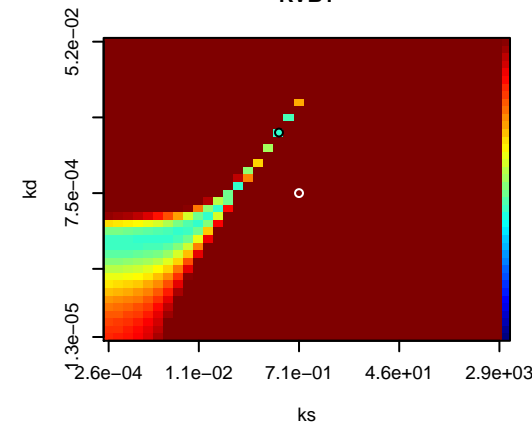

SRP102

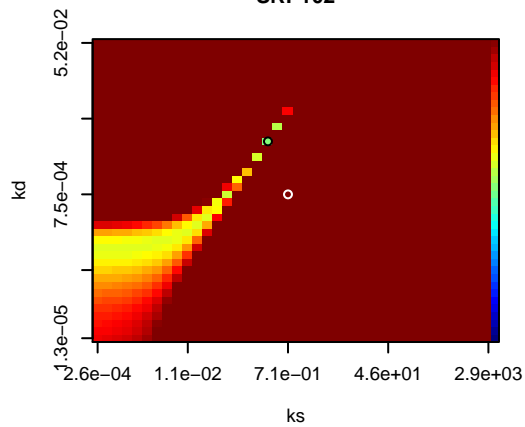

STO1

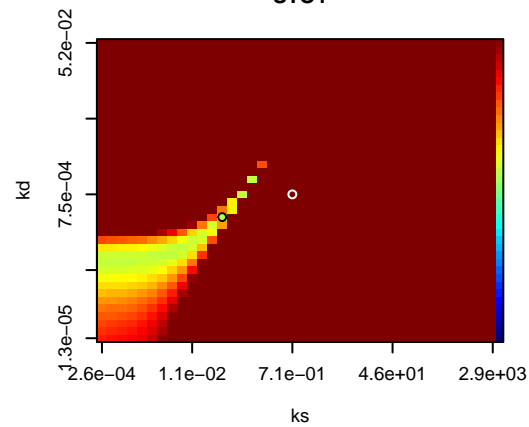

ALD5

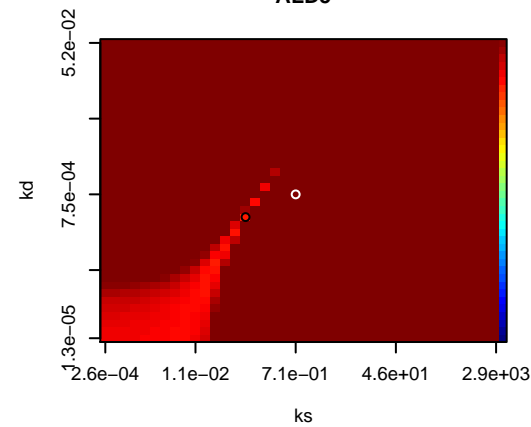

TAH1

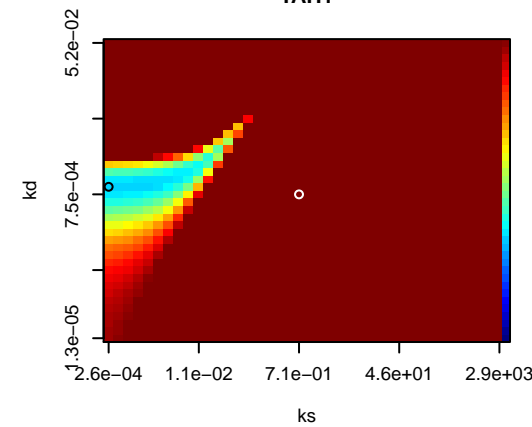

DJP1

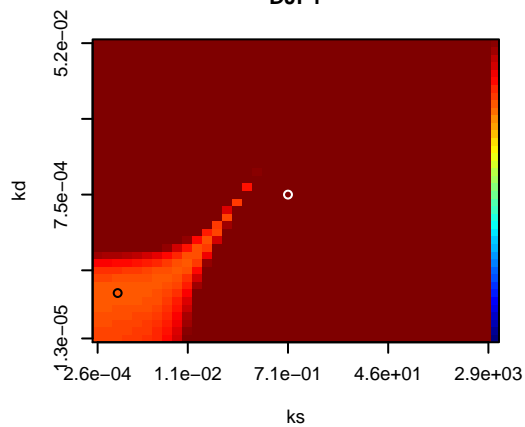

GCV2

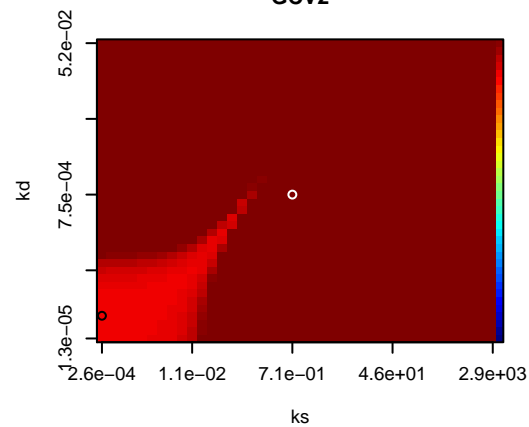

TIF4631

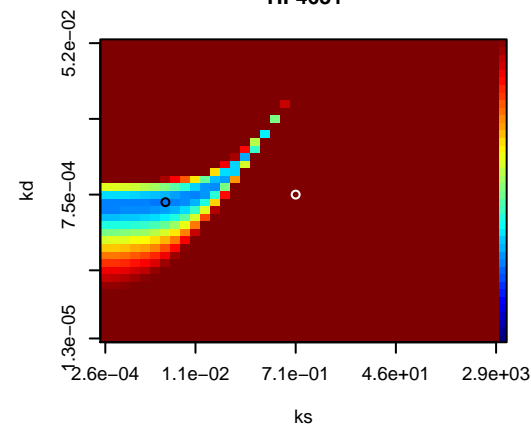

TIF3

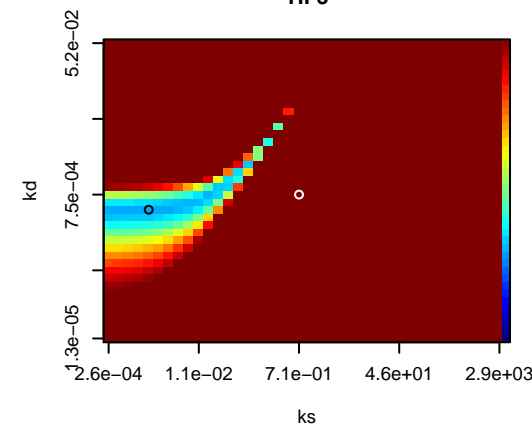

LEU1

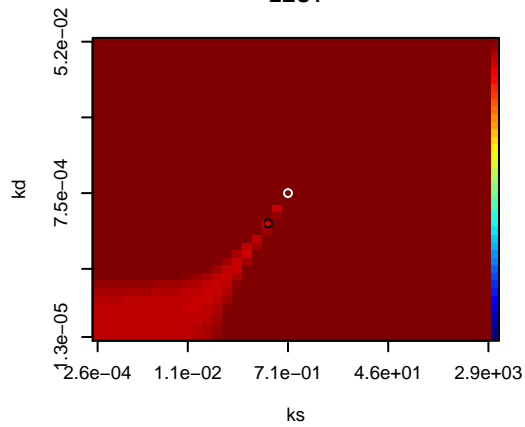

RBG2

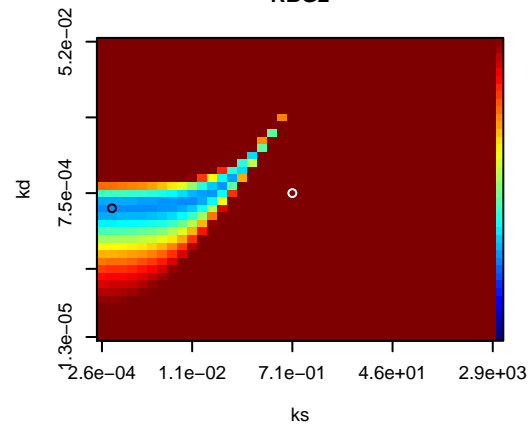

FUN12

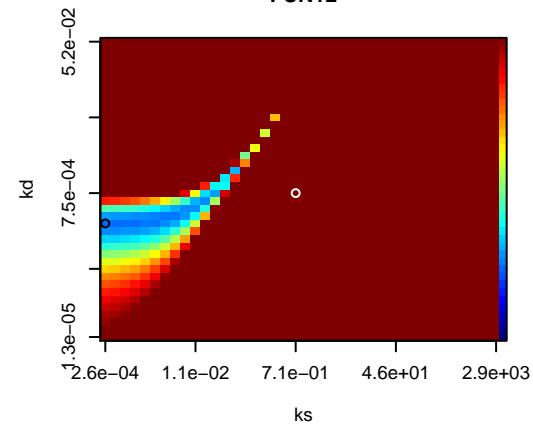

MRD1

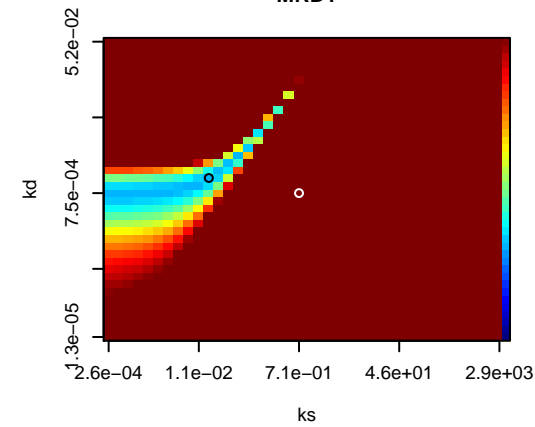

TRM8

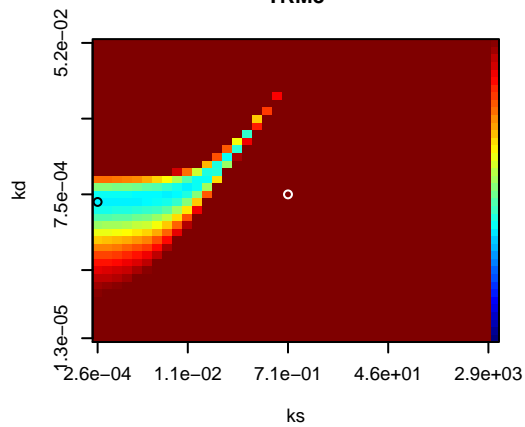

UTP9

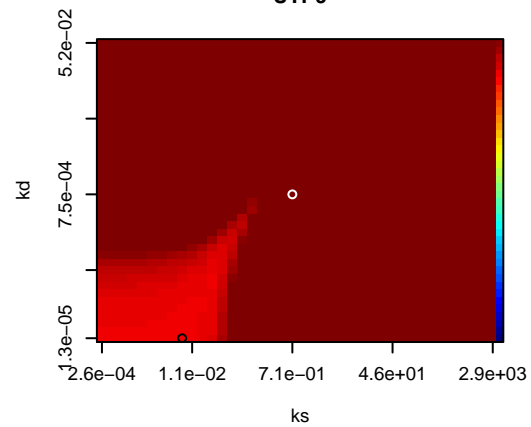

SEC14

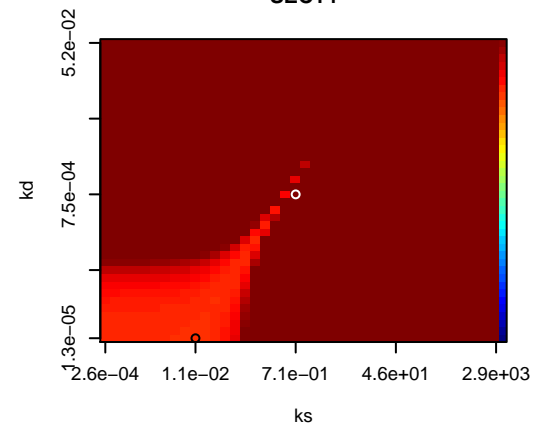

YTM1

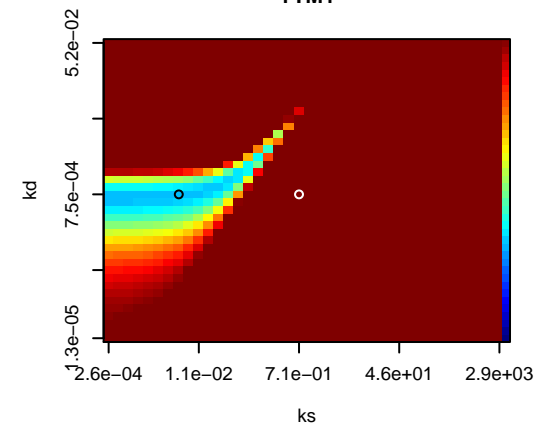

SRP40

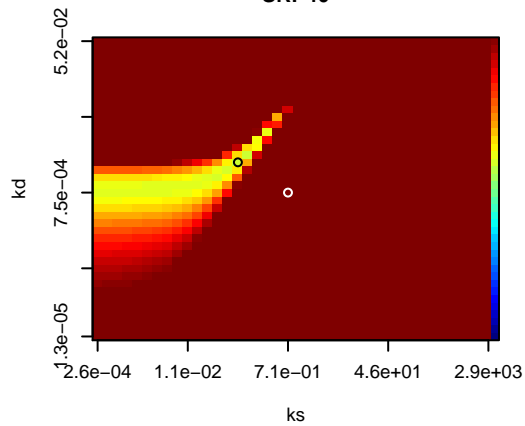

AHA1

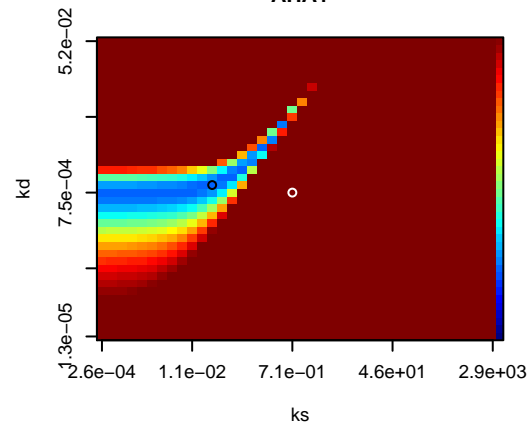

FOL1

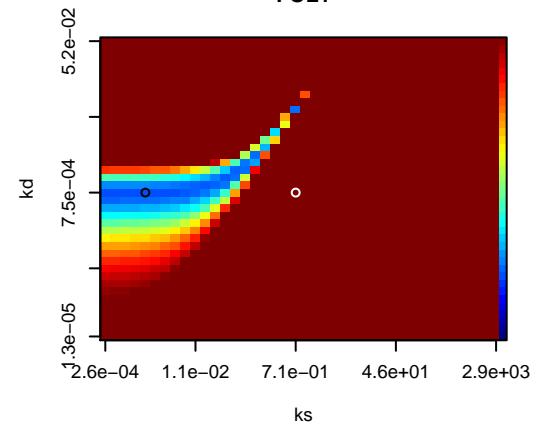

GIS2

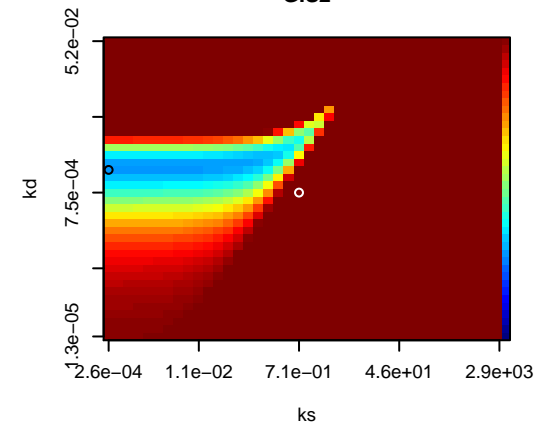

NOG2

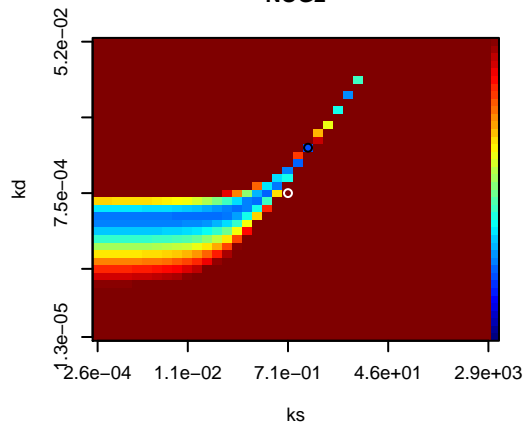

NOC2

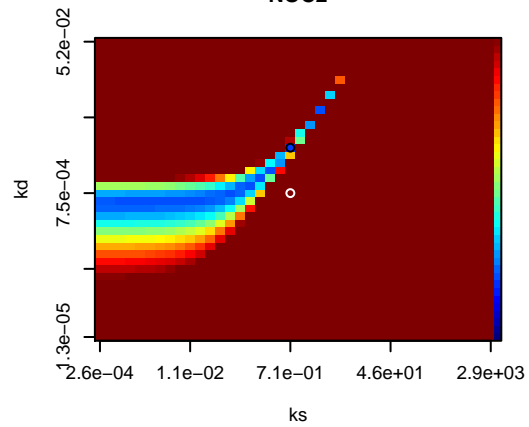

FPR4

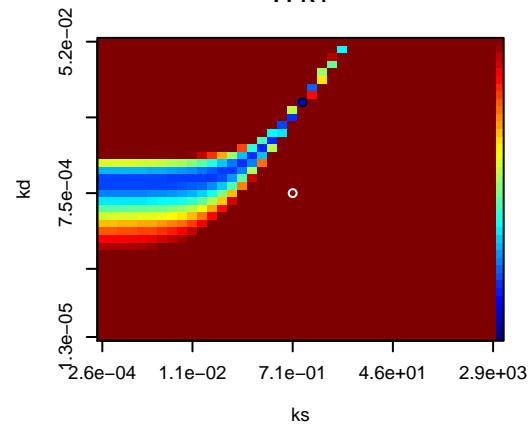

ERG6

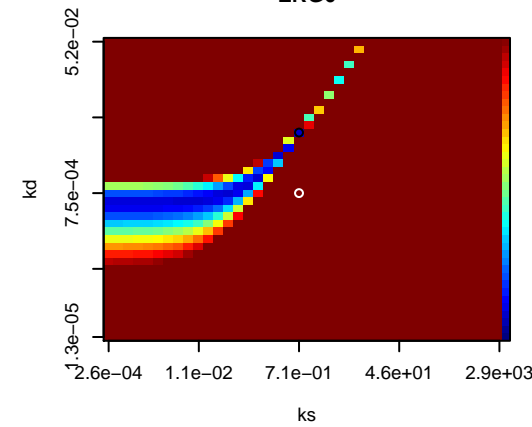

URB1

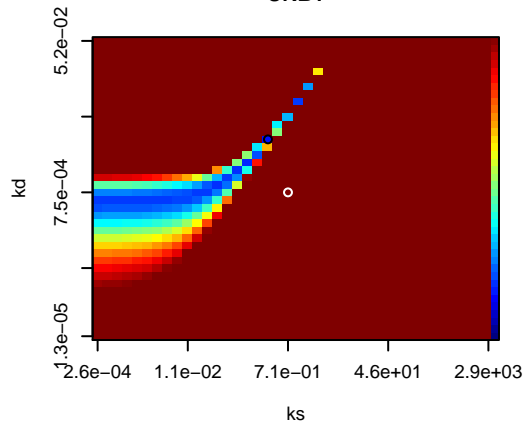

MAK21

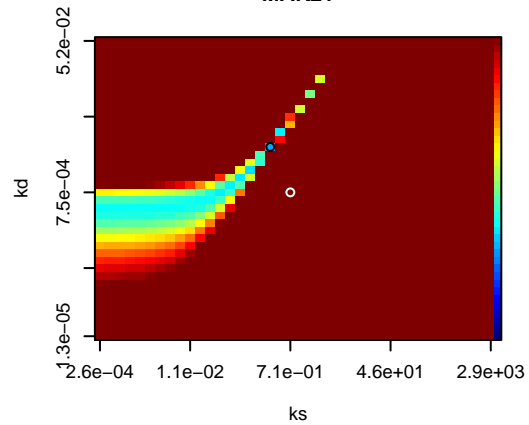

NAB2

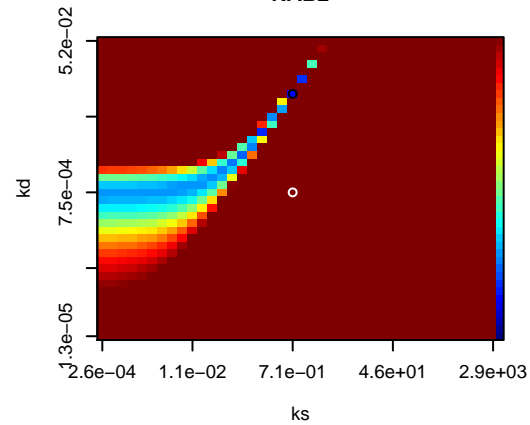

SPE2

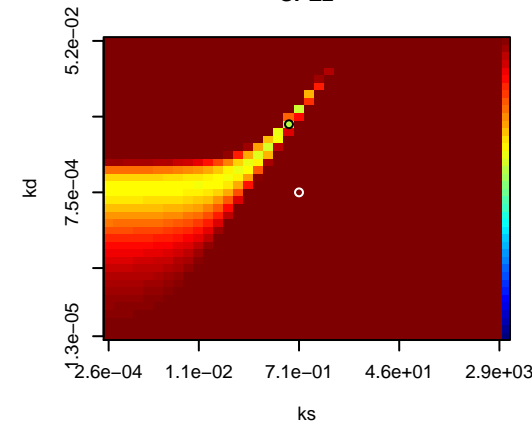

GLN1

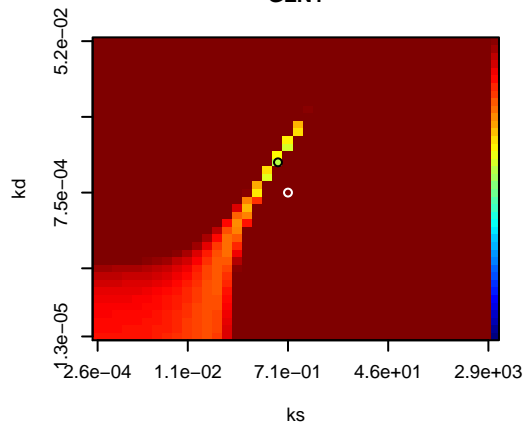

RSC6

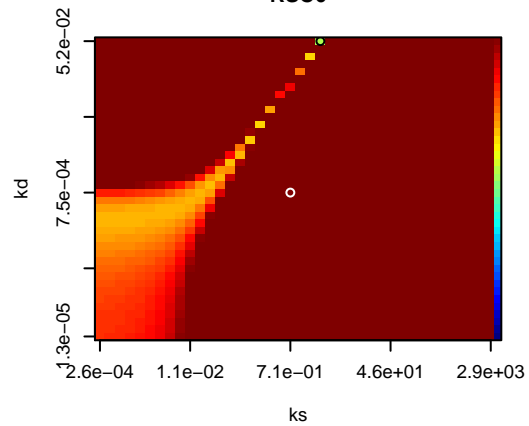

RFC1

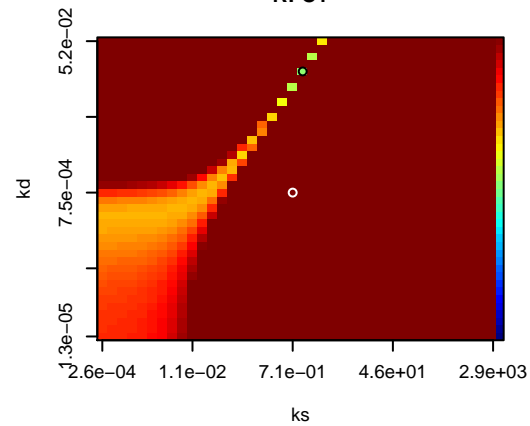

PSK2

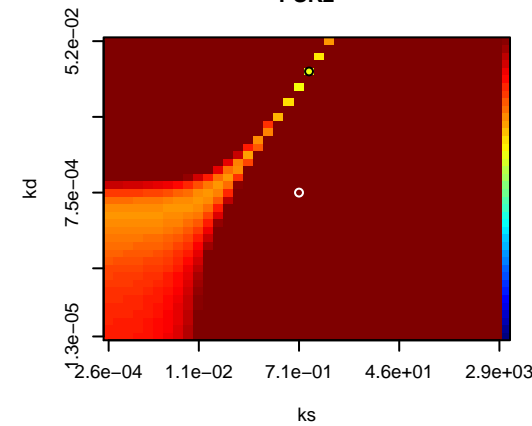

**HOC1**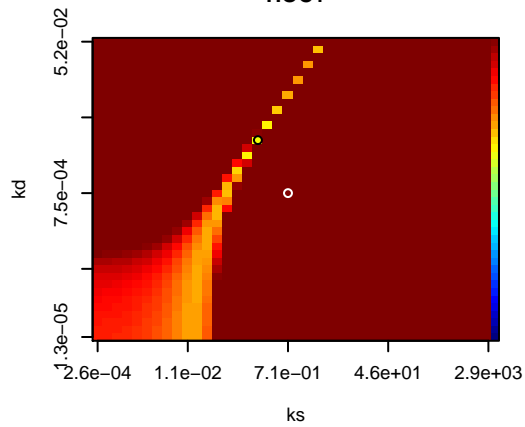**FBA1**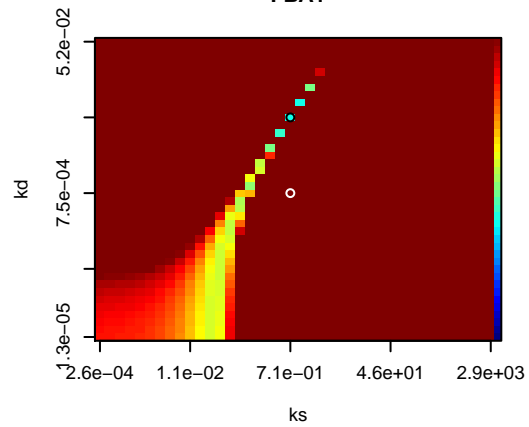**RSC3**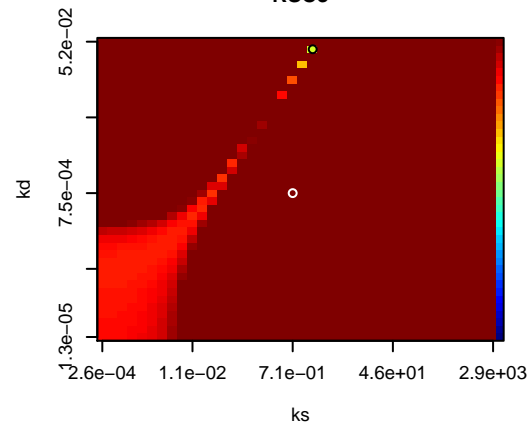**SEC61**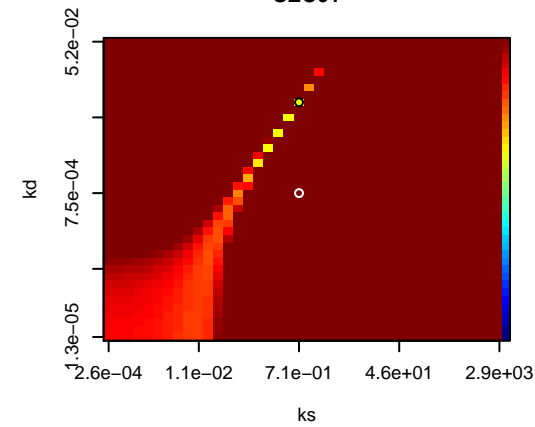**REB1**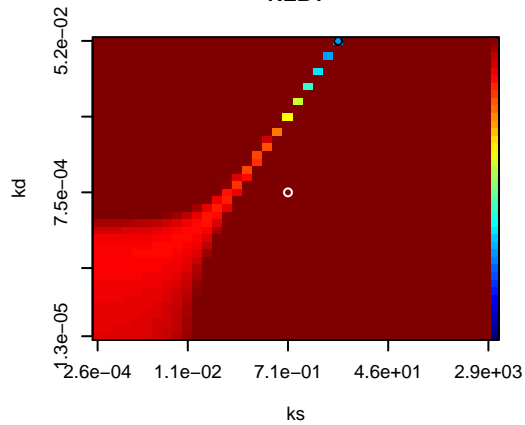**NUP188**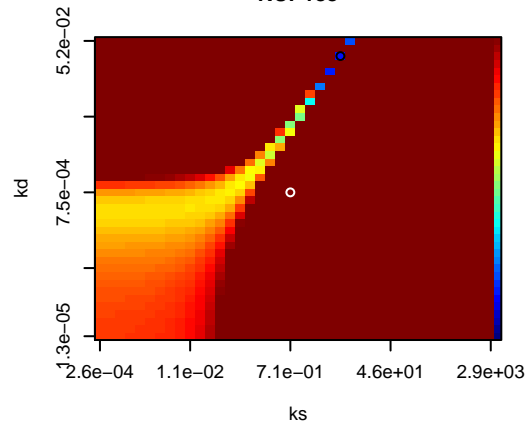**PDS5**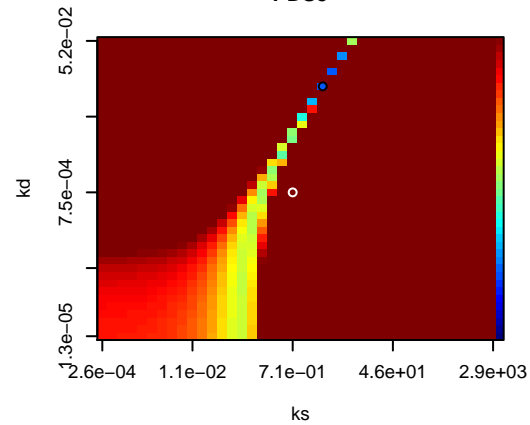**BOI2**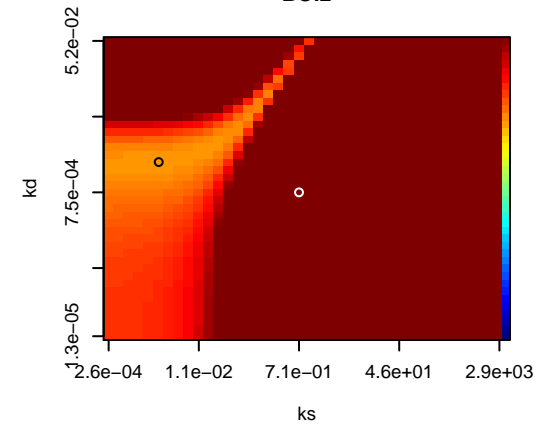**MPE1**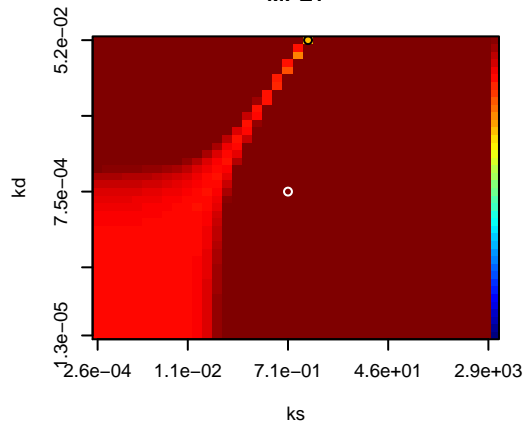**SLK19**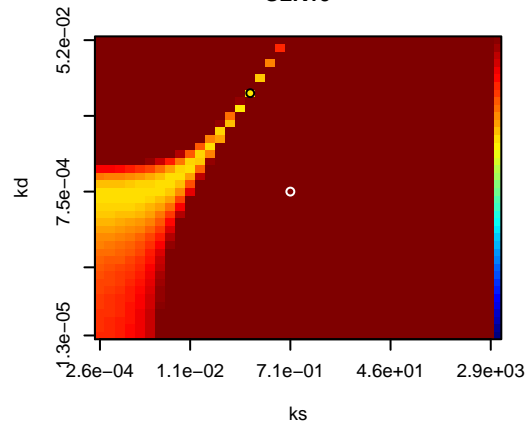**RPC25**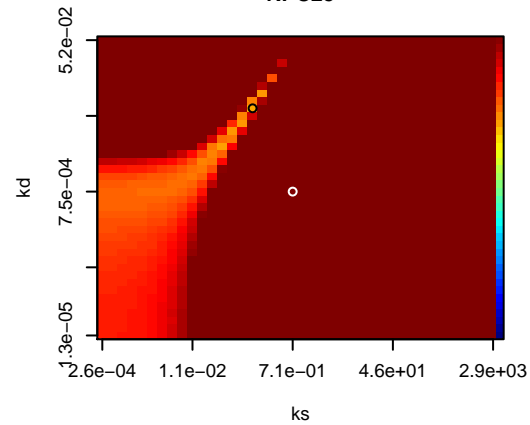**CDC123**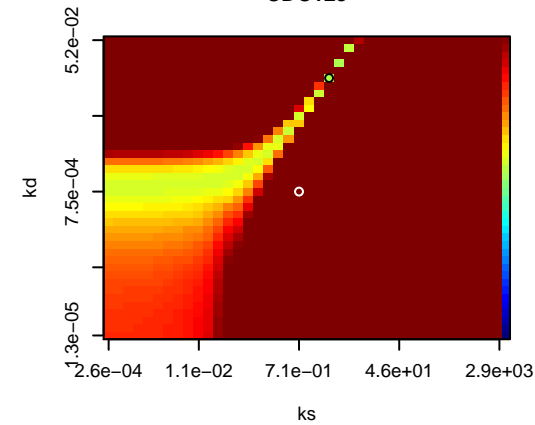

SMC3

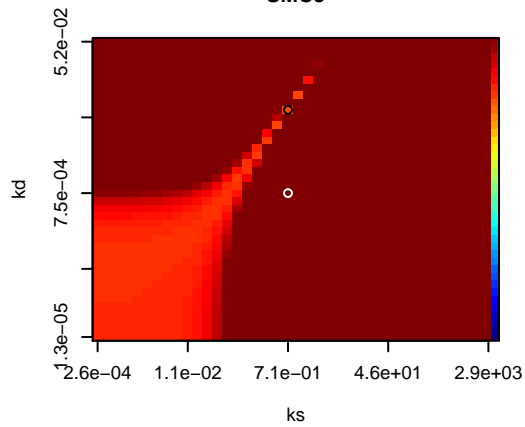

STI1

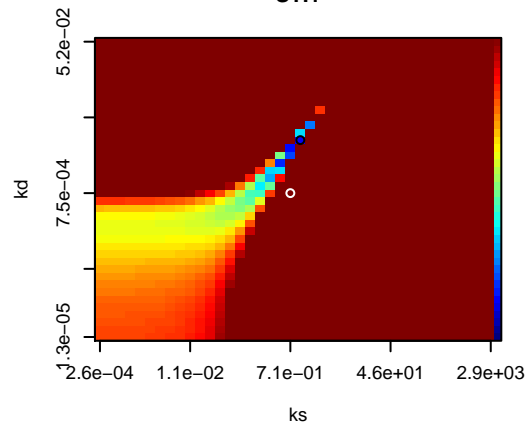

RAP1

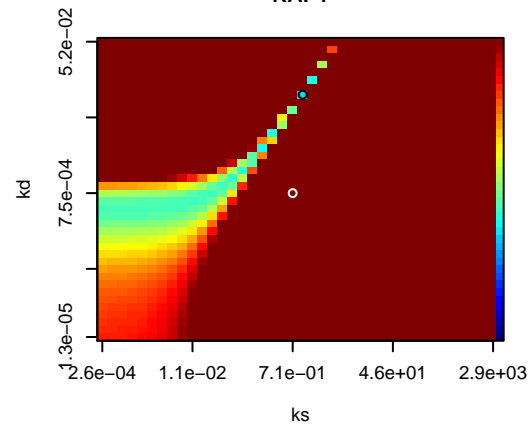

PSY2

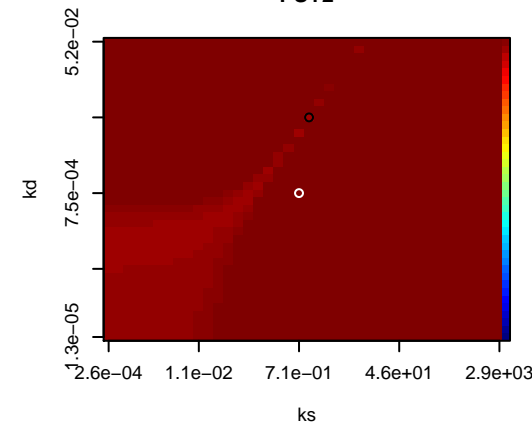

UTP6

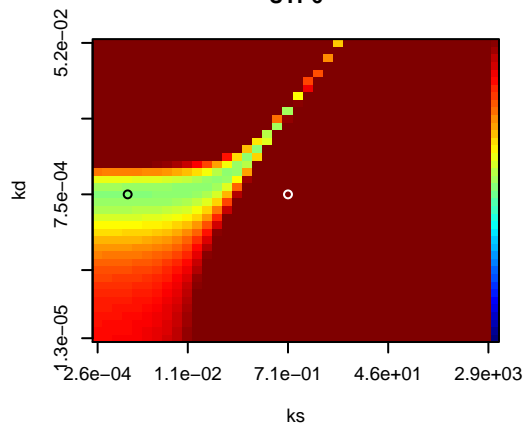

PMT3

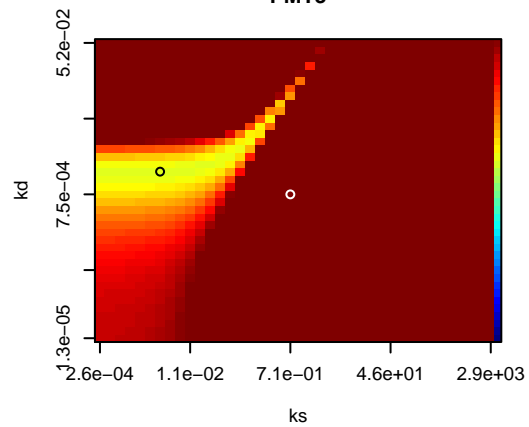

DPH6

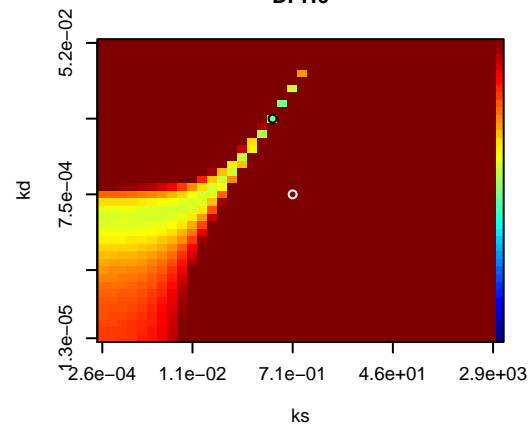

NUP133

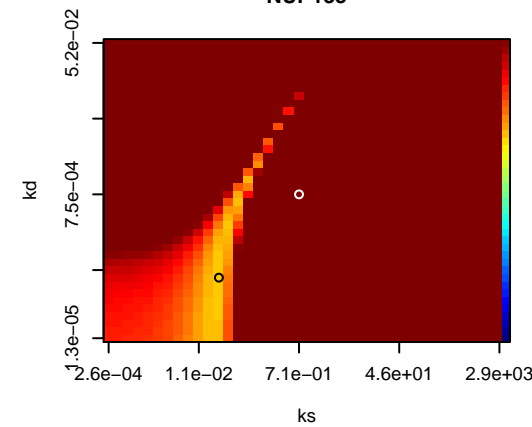

RPL21B

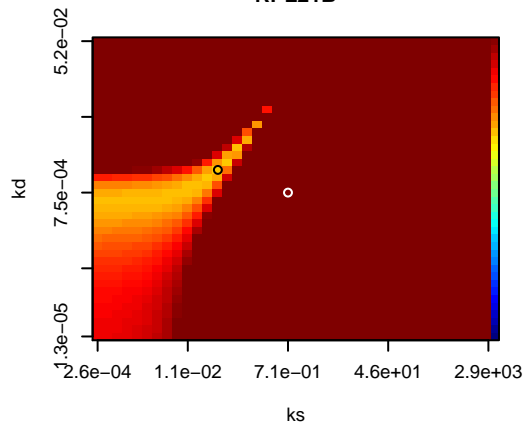

EMW1

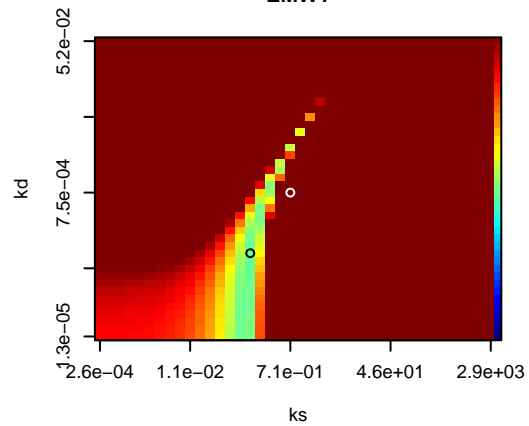

BUD6

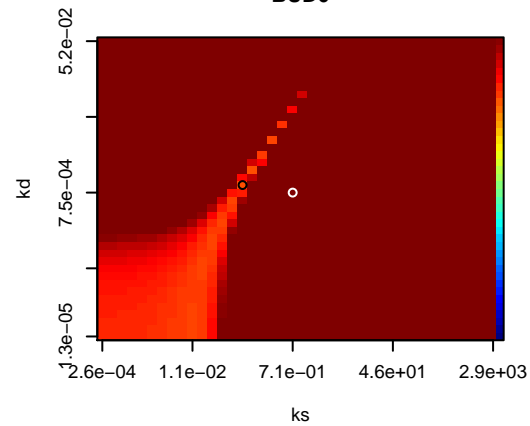

SFB3

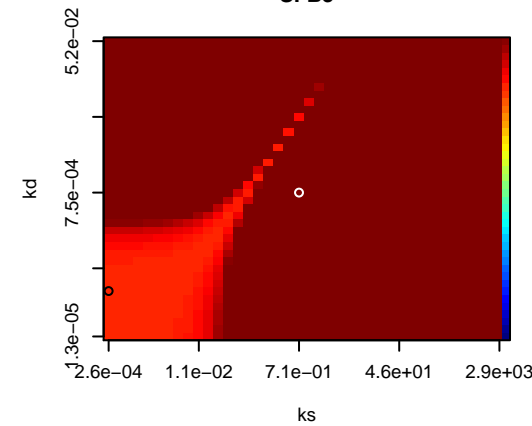

RRP15

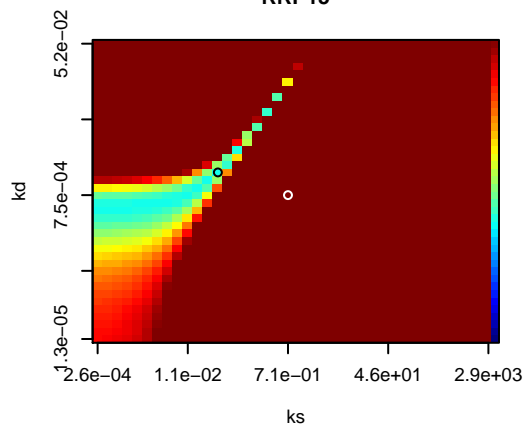

PGM1

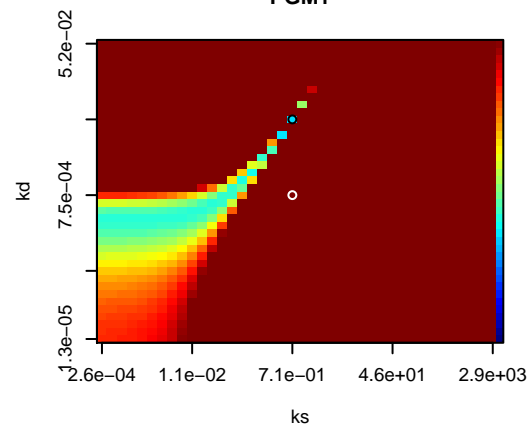

YPR097W

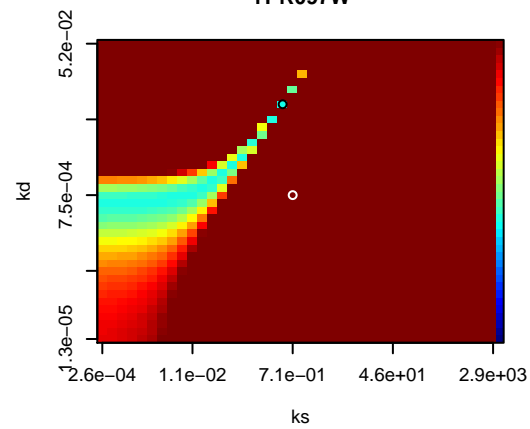

RPL13A

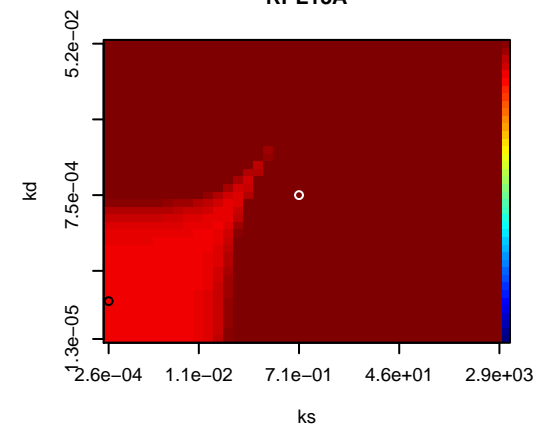

EFM1

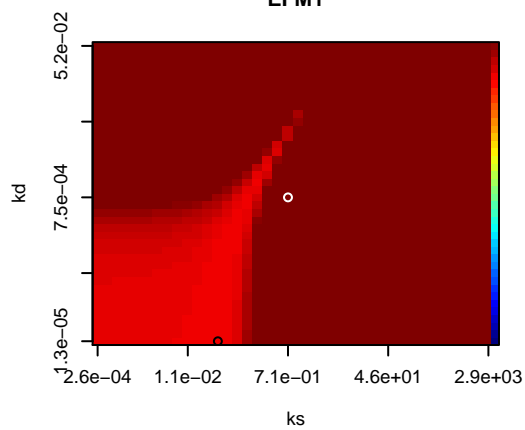

NPA3

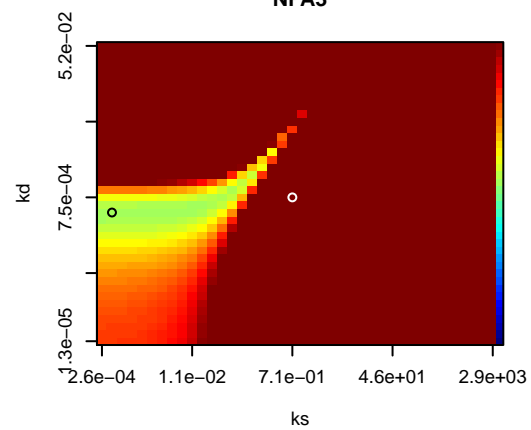

DCL2

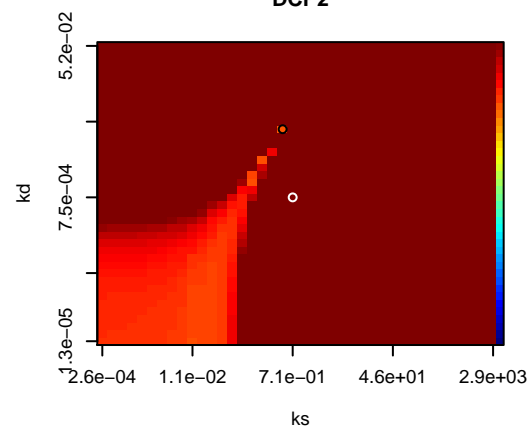

MCM5

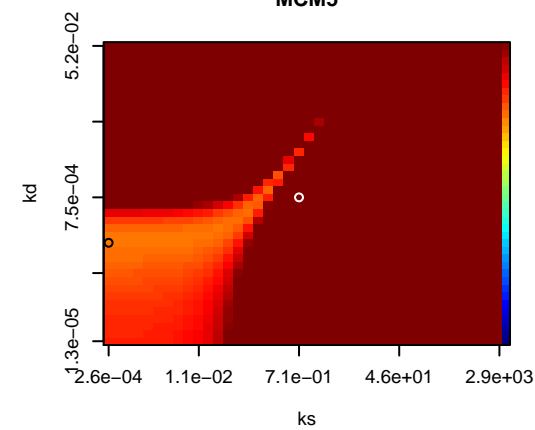

DBP6

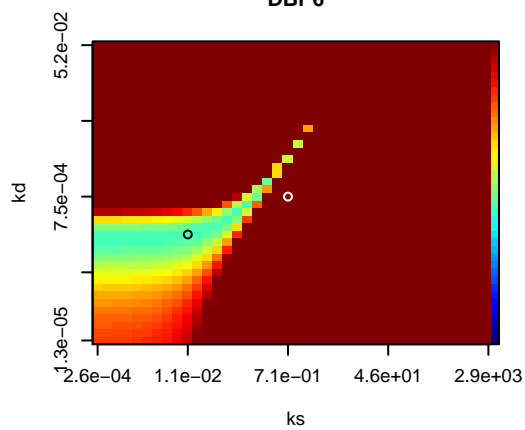

POL12

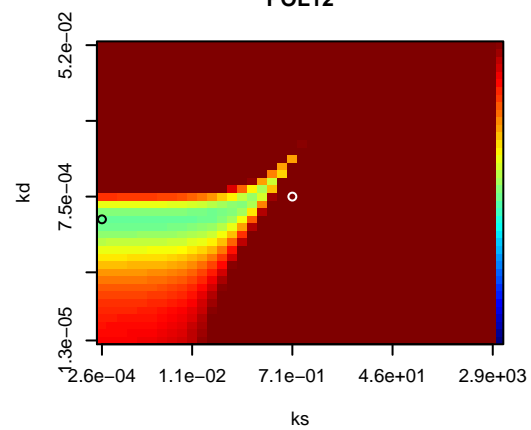

APL5

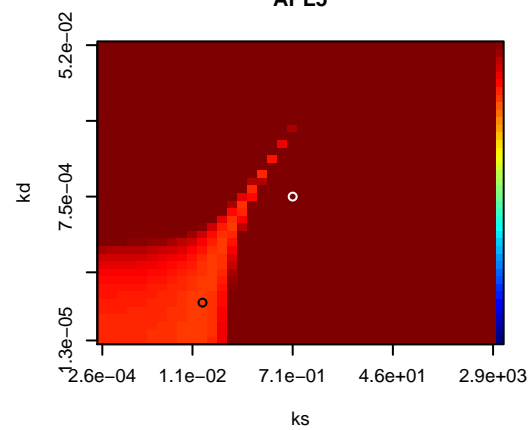

SKI3

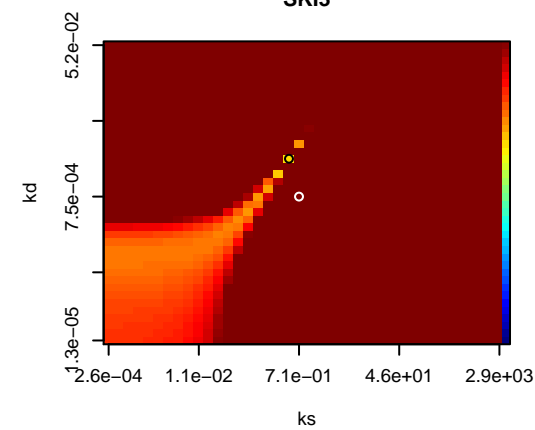

YOL098C

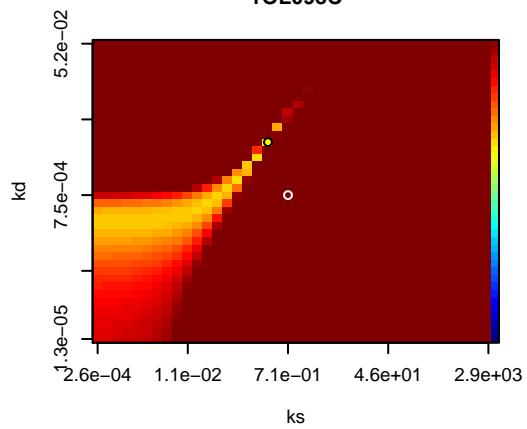

PRS2

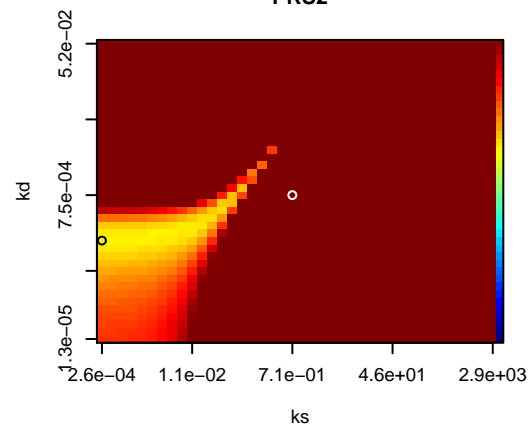

YCR087C-A

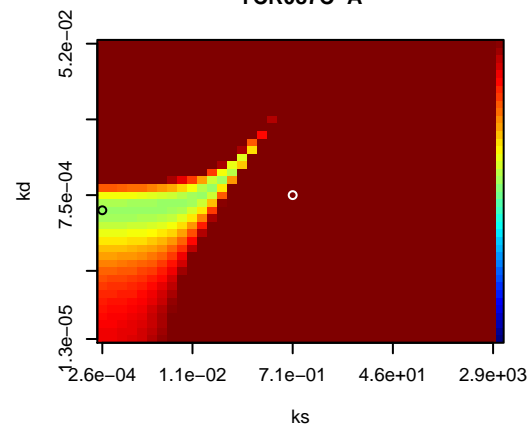

RRP40

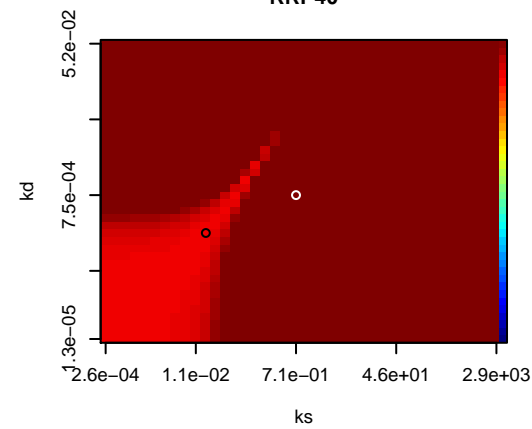

YRB30

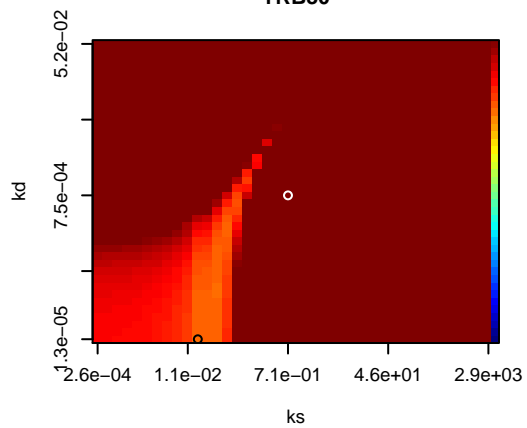

Supplement: c4mb00358f2.zip [file c4mb00358f2.zip]
