# Supplementary material for: One third of dynamic protein expression profiles can be predicted by a simple rate equation
Source: Royal Society of Chemistry journal article supplement (doi:10.1039/c4mb00358f), 2014-08-01
Supplement: c4mb00358f1.xlsx [file c4mb00358f1.xlsx]

## Sheet: notes
	INPUT
	R-number	RNA data with time point in min
	P-number	Protein data with time point in min
	The data was taken directly from publications (listed in the main paper).
	OUTPUT
	nnls.ks	ks estimate (non-negative least squares)
	nnls.kd	kd estimate (non-negative least squares)
	nnls.lin.err	linear error model
	nnls.err	ODE error model

## Sheet: input_Diamide
								P0	P10	P20	P30	P40	P60	P90	P120	R0	R10	R20	R30	R40	R60	R90
							YGL068W	889	605	1024	749	975	1024	497	1459	2.27	4.2	4.56	4.56	4.38	2.97	2.6
							YKL085W	748	731	613	833	1363	1101	916	972	7.01	22.15	26.71	20.96	17.26	8.81	7.01
							YFL017C		159			338	121	253	195	1.55		2.28	1.94	1.92	1.66	2.03
							YKL067W	2314	2138	2130	2840	3288	1777	2773	2912	3.08	7.26	7.84	7.21	6.24	5.35	4.06
							YER042W	1495	949	1285	2155	1919	740	2295	1709	1.67	3.48	4.34	3.6	2.23	3.24	2.44
							YDR353W	12131	12780	12427	13364	17173	14923	14834	14119	9.39	42.24	40.24	33.14	32.69	23.76	13.65
							YHR005C-A	5020	4349	5953	6134	5513	6550	4649	5601	4.6	6.83	7.07	7.07	6.83	5.66	4.03
							YKL150W		70			174	39	217	188	2.23	6.9	9.63	8.44	7.3	4.52	3.6
							YKL035W	1379	1360	1592	2145	3167	1162	2222	1708	5.16	24.73	45.83	42.47	26.14	8.27	7.51
							YGR167W	346	802	361		1147	807	692	787	2.38	4.83	5.4	4.8	4.18	3.26	2.72
							YBL050W	413	538	441	386	706	421	758	543	1.36	2.65	2.62	2.54	2.29	2.04	1.56
							YHR137W	141	30	170	119	202	65	182	242	0.43	1.42	2.78	2.96	2.18	0.66	0.35
							YLR258W	52			78	38	12	99	38	2.43	17.89	29.06	22.33	16.35	4.86	4.96
							YBR203W	59	103	89			83	65		0.54	1.22	1.58	1.16	1.07	0.76	0.6
							YBL030C	169	81	237			142	16		8.65	13.67	11.82	10.8	11.42	7.85	8.13
							YPR069C	1357	1046	1119	1395	1468	919	663	591	4.64	6.09	5.6	4.71	4.42	4.24	4.3
							YIL063C	350	325	522		299		260	259	1.4	1.27	1.36	1.19	1.34	1	1.41
							YGL105W	2586	2143	3074	2918	2893	2225	2784	3033	7.62	10.34	8.4	8.22	8.63	8.63	7.31
							YGL229C	88	66	97			90	25		0.55	0.92	0.96	0.84	0.77	0.34	0.47
							YDR180W	32	50	56		64	27	28	27	1.13	1.46	1.34	1.14	1.33	1.18	0.95
							YDR011W		36			60	20	15	51	4.09	6.03	5.95	4.97	5.43	4.54	4.7
							YBR208C	45	28	88		27	15	44	15	1.16	0.84	1.17	0.98	0.95	0.9	0.77
							YNL242W	39			55		32	19		0.6	0.71	0.69		0.64	0.51	0.43
							YDL058W	63	61	81	61	73	27	29	38	1.42	1.28	1.37	1.16	1.17	0.88	1.1
							YJR104C	6523	6793	7805	11450	11518	13653	15424	18202	21.39	105.34	122.69	121.84	98.97	71.45	40.19
							YDR533C	497	867	2830	3756	6717	8194	9688	9997	1.89	32.55	44.46	59.49	71.24	62.88	32.78
							YOR285W	1436	1081	1125	1111	3912	4412	3288	4102	7.34	22.57		41.83	44.21	25.93	15.74
							YGR209C		679	1534	1743	3749	3064	3694	2882	16.2	94.85	123.44	134.14	71.89	101.66	58.8
							YPL170W	326	287	768	475	563	730	472	390	1.39	2.37	2.32	2.72	2.18	2.18	1.7
							YCL035C	1469	1046	852	1061	2219	2360	1995	3113	4	8.05	11.23	12.63	10.62	8.28	6.54
							YLR109W	29625	49482	32823	38927	95124	93990	91229	82332	20.55	86.89	100.5	97.75	109.22	78.85	50.95
							YDR032C	523	366	649	570	1386	2260	2964	3795	5.84	20.9	30.81	41.5	40.65	41.5	20.32
							YDR272W	218	117		56	596	558	278	608	1.81	3.43	4.31	4.2	4.14	3.22	2.48
							YDR513W	2045	2249	4990	5286	4480	5260	5263	5133	2.96	19.23	20.19	18.45	16.51	8.14	4.91
							YMR090W	90	194	221	385	1272	721	1440	1030	1.45	10.28	26.74	17.52	22.33	19.71	6.73
							YOR020C	5318	6520	7644	9456	10884	10451	11096	12645	8.89	35.79	45.3	49.23	43.45	29.47	20.13
							YBL041W	1211	902	1065	1228	2339	1353	2045	1414	3.72	7.29	8.09	7.82	6.31	8.61	5.45
							YBR149W	789	958	338	1001	2168	1735	1952	2178	4.09	12.06	16.82	21.59	21.74	13.76	7.17
							YMR318C	1551	1453	1963	2394	4080	4027	4730	5756	7.07	38.38	48.58	60.23	53.16	54.28	33.88
							YMR038C	1843	2806	3668	5960	7011	5673	4370	7031	1.69	4.91	3.35	2.98	3.35	3.44	3.42
							YIR037W	194	212		528	535	223	1155	1609	4.17	9.38	14.42	15.35	21.56	15.78	7.89
							YKL142W	144	357	364	269	822	691	839	620	2.32	7.57	11.24	9.86	7.84	6.03	4.03
							YCL018W		21	276		164	235	77	126	38.65	52.43	54.66	80.03	99.9	129.11	77.84
							YOL151W	247	490	208	704	1239	925	1289	1094	2.4	43.81	34.85	21.9	24.99	20.16	15.92
							YHR106W	59	94	240	178	117	173	207	189	1.01	1.92	1.92	1.88	1.93	1.53	1.24
							YNL156C	218	613	769	527	614	527	1032	937	2.13	4.25	5.2	5.16	5.81	5.05	3.18
							YOR122C	312	553			2459	584	1034	724	9.79	17.53	17.29	19.45	18.79	17.29	13.85
							YFR052W	63	160			320	324	181	212	2.88	6.34	7.64	7.08	8.08	7.54	4.71
							YFR050C	153	449			1049	582	349	231	4.05	8.8	10.1	9.3	10.17	11.06	6.18
							YNL274C	47	69	289	475	1437	1214	1351	1563	0.76	10.25	18.61	17.24	13.72	5.93	3.29
							YGR232W	373	108	252		307	122	648	364	3.32	5.86	6.41	6.63	6.92	5.43	4.03
							YPL061W	2998	4580	6103	9103	15936	14199	20072	29838	4.7	35.33	36.57	37.08	40.3	15.38	20.15
							YPL091W	401	294	401	217	700	436	552	543	2.18	5.11	5.33	5.26	4.94	3.3	2.98
							YML070W	396	189	450	359	528	424	590	772	1.31	1.88	2.89	3.71	4.03	3.25	2.28
							YJL068C		128			273	455	153	122	1.11	2.11	2.76	3.26	3.72	3.64	1.95
							YPL154C		55		80	348	257	377	281	13.31	39.79	56.67	75.29	76.88	57.06	33
							YHR104W	413	556	618	920	1858	1430	1766	1467	1.05	4.91	8.08	8.43	8.97	4.33	3.28
							YEL071W		233	541	1079	931	710	1543	2968	2.33	3.18	3.89	4.17	5.58	4.93	1.91
							YOL064C	44	101	88	40	221	153	132	139	1.41	1.89	2.04	2.02	2.21	2.23	1.63
							YLR354C	760	353	456	1092	1175	905	2343	6622	6.4	17.49	21.24	23.41	28.42	27.84	19.96
							YCL044C	108		303	250			272		0.42	0.56	0.76	0.97	1.11	1.05	0.94
							YLR438W	2143	1521	1987	2305	4883	3345	3849	3664	0.82	1.56	2.54	3.06	2.65	1.44	1.45
							YLR259C	9414	10376	11429	15183	15220	14006	20901	22938	10.09	28.34	38.99	41.21	38.72	26.63	24.84
							YNL134C	1284	2870	2993	7642	14243	15050	14730	16551	4.01	78.51	101.46	88.94	95.99	95.33	71.75
							YMR072W	272		463		622		738	422	3.98	6.37	6.11	5.32	6.15	5.98	5.28
							YKL103C	159	151	166	432	1017	601	596	452	0.71	4.1	7.65	7.87	8.85	4.88	2.12
							YFL039C	3264	3452	2639	5314	6192	5655	6076	8071	39.01	62.07	55.17	62.94	66.07	64.71	54.79
							YNL241C	1077	816	670	1330	2502	1708	1696	1670	1.53	6.14	7.67	8.33	7.01	4	2.79
							YAL012W	12374	12125	9071	18490	16884	20117	15368	20102	8.94	19.16	20.96	18	16.45	16	12.29
							YOR374W	71	139	104	454	2864	2397	3619	3379	1.23	19.28	32.42	43.67	31.53	10.84	4.4
							YLR216C	248	24	663	518	243	210	193	187	4.37	18.08	24.02	17.95	12.78	15.85	14.38
							YOR142W	161	128	228	202	432	231	458	391	2.13	4.12	5.25	5.67	5.22	2.98	2.76
							YDL124W	1134	1341	2340	3084	4772	5094	3684	3723	3.94	31.06	54.83	48.4	48.74	48.74	19.25
							YER136W	83	89			496	258	250	394	2.82	3.72	4.84	4.65	5.84	4.74	4.07
							YNL239W	77	135	136	56	400	203	256	288	1.69	2.37	3.02	4.12	4.8	3.98	2.93
							YBL075C	43	54	49	82	81	89	86	111	1.61	3.85	5.37	4.3	4.18	4.04	4.01
							YDL126C	337	332	649	467	779	557	971	1055	6.23	10.13	17.03	18.25	20.82	20.82	12.47
							YJL034W	195	170	182	716	1212	502	1628	2322	9.74	23.49	30.78	28.92	36.6	59.05	51.77
							YMR250W	70			154	283	125	428	298	0.68	5.1	10.13	11.88	9.85	2.93	1.53
							YOL049W	32	37		118	178	108	124	67	1.84	3.35	3.59	3.37	3.08	2.7	2.68
							YMR002W	3183	3580	7457	6271	2365	8316	4894	5999	3.61	7.96	9.74	10.51	10.8	7.75	5.59
							YPL106C	1274	1006	1088	1913	2717	1923	4322	5865	9.45	12.82	14.94	13.28	15.25	21.42	21.12
							YMR196W		11			8	26	46	66	0.93	3.29	7.77	8.04	7.5	2.51	1.34
							YOR042W	109	96	265	189	109	167	257	231	1.76	2.87	3.5	3.01	3.31	2.51	2.33
							YJR010W	162			103	577	296	512	384	0.54	0.95	1.29	1.38	1.74	1.84	0.91
							YGR136W	621	578	1133	938	1612	2237	1787	2927	1.8	3.49	3.74	3.1	3.26	3.69	2.61
							YAL005C	8400	10610	9416	17161	23677	21358	27784	31629	9.78	22.31	29.24	18.63	19.56	23.1	20.39
							YDR168W	175	149	225	258	185	252	327	304	2.23	2.82	4.13	4.13	4.33	3.57	2.94
							YMR092C	329	281	283	240	561	395	642	517	1.59	2.42	3.35	3.1	3.44	2.54	2.27
							YLR028C	124	99	98	103	252	395	313	733	2.44	2.83	3.34	3.7	4.11	3.89	3.6
							YLL024C	11183	14270	12275	19523	29680	25204	31657	37249	22.55	55.91	57.09	38.45	42.96	49.01	49.7
							YBL058W	184	228	266	97	510	855	263	645	2.78	5.97	6.48	6.95	7.14	5.12	3.31
							YCL057W	137	110		88	545	314	180	290	1.45	2.37	3.19	3.56	4.12	3.21	2.19
							YDR001C	14		26	35	61	26	49		2.97	8.35	11.98	12.75	12.84	6.46	4.57
							YJR045C	3694	4047	3929	4609	7280	5253	6089	5945	6.13	14.37	18.57	16.17	16.62	12.6	11.2
							YDR099W		44			91	80		71	4.84	8.78	9.28	9.41	10.66	9.21	6.89
							YKL010C	10	11		14	72	28		14	1.2	1.03	1.2	1.23	1.33	1.14	1.33
							YGL006W	12		39		124			45	1.5	2.78	3.42	3.35	3.4	2.11	1.69
							YGL062W	41	73	23	122	234	95	829	274	0.95	1.05	1.52	2.02	2.15	1.48	1.28
							YPL085W	46	26	53	65	54			59	1.57	0.83	1.45	1.39	1.48	1.39	1.34
							YJR063W	1746	1023	2446	715	692	909	1191	1916	2.57	1.52	0.97	1.21	1.31	2.55	2.55
							YPL239W	654	811	526	228	832	628	608	483	2.41	2.18	1.64	1.26	1.61	2.44	2.98
							YBL003C	6112	4298	3650	2930	5420	2276	3361	2835	19.58	30.72	24.1	14.33	12.74	20.98	24.44
							YPR187W	516	128			135	149		337	4.43	4.4	2.75	2.51	2.46	3.48	3.34
							YKL009W	1700	1025	1200	1219	1558	966	861	868	5.6	2.63	1.34	1.85	1.8	4.87	4.77
							YLL045C	21647	20291	17620	17014	20699	13660	14680	221	30.6	37.67	22.87	13.5	13.14	25.03	28.75
							YBR088C	1586	977	946	706	1284	521	686	535	4.22	3.24	2.58	1.9	3.54	3.59	3.88
							YLR017W	652	244		91	511	262	230	626	2.63	1.85	1.32	1.26	1.74	2.84	3.05
							YLR172C	237	220		155	313	174	159	53	1.78	1.57	0.96	0.8	0.86	1.45	1.86
							YAL038W	43257	41252	32426	35822	45327	31955	31455	27963	74.36	93.48	71.33	63.85	66.1	102.29	70.84
							YHR068W	3964	3294	2519	2565	3785	3611	2812	2787	7.01	6.86	5.46	4.28	5.06	7.36	7.15
							YLR244C	2034	1344	1543	1559	1817	1218	1237	1566	3.46	2.54	1.94	1.7	2.12	3.56	3.32
							YJR105W	11050	8962	11285	10172	12747	9619	9340	7435	4.98	6.57	4.77	4.64	5.01	5.33	5.22
							YGL232W	111	108	147	63	183		44	58	1.84	2	1.66	1.46	1.46	1.55	1.66
							YKR043C	2813	2725	3715	2329	3167	1800	2996	2217	3.58	3.46	2.25	1.67	2.1	3.61	3.95
							YOR184W	4230	3364	2579	3300	4228	3342	3433	2713	3.44	3.69	2.82	2.56	2.86	3.28	3.28
							YER043C	7297	6036	7014	7988	8494	5170	7291	6835	18.8	15.81	11.65	12.57	14.65	20.71	19.33
							YBR248C	332	279		209	374	134	225	246	1.34	0.84	0.66	0.63	0.79	0.82	1.19
							YNR043W	1608	1854	1299	1276	1633	1575	1824	2009	2.33	1.84	1.5	1.45	1.84	2.5	2.29
							YDR165W	134	84	98	111	152	52	63	148	2.92	1.43	0.76	0.91	1.2	2.25	2.42
							YCR053W	5354	4078	3485	4059	4141	3083	3043	2665	5.55	4.51	3.49	3.16	4.06	4.38	4.9
							YPL212C	235	153	156	182	80		94	211	1.71	1.04	0.75	0.69	0.89	1	1.49
							YML056C	2669	2230	651	576	1873	1426	404	310	5.95	3.69	1.96	1.31	2.09	5.26	5.29
							YLL018C	3705	2853	2964	3909	3579	2258	3802	3508	6.41	6.06	4.96	4.53	5.2	6.36	6.36
							YHR170W		78		10	74	41	50	59	3.25	1.1	0.59	0.59	0.94	2.46	2.41
							YGR094W	2649	2086	2365	2642	2738	1822	2406	2430	3.93	2.36	1.89	1.81	2.17	3.11	3.42
							YER165W	2307	2337	2689	2648	2687	2389	2596	2473	4.84	4.07	3.11	2.76	3.67	6.08	4.52
							YDR378C	969	653	549	697	122			329	1.89	2.97	2.3	2.22	1.76	2.14	2.19
							YER057C	1995	2385	2022	909	3813	2561	1280	2279	3.08	4.3	3.51	3.44	4.06	4.42	3.39
							YNL259C	1008	1149		341	1363	711	659	1442	2.89	4.33	4.7	4.24	4.24	5.04	3.79
							YOL143C	5178	3846	4114	3567	5305	3387	3398	3670	5.3	9.42	7.92	6.3	6.57	5.88	4.71
							YPL041C		510	284	161	139			425	0.75	0.77	0.8	0.91	1	1	0.91
							YGR181W	870	404	746	541	156		828	234	2.82	5.15	3.85	3.8	3.7	3.04	3.11
							YGL242C	2989	2275	2000	2519	2314	1665	2081	1398	2.8	4.62	5.02	4.31	4.05	3.4	3.22
							YOR202W	1820	1434	1818	1168	1056	770	526	1076	1.44	1.5	1.32	1.19	1.29	1.45	1.07
							YBR011C	19734	21849	18020	19232	21890	19421	18111	15288	9.78	13.36	11.88	10.56	12.64	13.36	11.72
							YJL184W	872	581	627	218	616	322	641	620	1.13	1.21	1.12	1.08	1.1	1.37	1.52
							YMR074C		576		217	1260	365		263	2.67	4.71	4.52	4.34	4.37	4.16	3.2
							YAL044C	3958	3050	3728	3107	2817	2714	2743	3095	5.07	7.52	6.5	6.78	7.32	7.42	6.33
							YLR351C	298	145	183	189	166	215	196	172	2.48	2.93	2.62	2.73	2.91	3.61	3.61
							YGR267C	341	107			113			48	3.07	3.94	3.43	2.77	2.95	3.16	2.99
							YDL078C	708	439	246	298	230		170		2.97	5.07	5.55	5.67	4.54	4.35	3.49
							YER152C	32			15			16		1.44	1.41	1.44	1.95	2.07	2.41	2.08
							YDL086W	394	617	523	183	619	329	445	670	3.25	4.35	4.47	5.24	6.07	5.43	4.26
							YBL091C	135			124	53			38	2.99	4	4.29	3.63	3.71	3.76	3.12
							YOL058W	1171	699	820	576	746	344	466	289	2.9	3.11	2.92	2.92	2.82	3.35	3.2
							YER089C	338	228	269	185	351	264	237	292	2.12	2.58	2.56	3.05	2.69	2.41	2.82
							YPL028W	7054	6594	4733	6304	7169	5794	6250	7220	6.41	8.06	7.95	7.06	6.97	7.06	7.68
							YDL042C	356		268	444	203		308	144	1.16	1.03	1.02	1.03	1.08	0.94	1.08
							YDR167W	560		583		398	666	440	322	1.55	1.93	1.71	1.51	1.56	1.76	1.61
							YPR074C	8980	8275	6907	9316	9114	7430	7452	8615	9.45	11.64	10.56	10.64	11.09	11.32	9.32
							YPL262W	1641	1426	887	1319	1466	1203	1131	1464	2.03	2.82	2.59	2.34	2.34	2.57	2.63
							YDL185W	1345	933	800	1054	936	879	665	1186	5.11	3.82	4.04	5.33	5.79	5.37	5.33
							YAL051W	37		37	50	10	28		19	1.33	1.33	1.41	1.32	1.23	1.21	1.08
							YER091C	2702	2462	2258	2150	3255	2039	2112	1768	2.85	4.62	4.14	4.56	5.53	3.73	2.91
							YHR108W	253	180	294		81	288	118		1.7	1.67	1.62	1.33	1.69	1.63	1.59
							YDR207C		66	51		20	8	48	42	0.5	0.51	0.52	0.48	0.51	0.46	0.45
							YDR027C	25			14			11		1.1	1.09	1.32	0.82	1.11	0.82	0.72
							YGR204W	4186	2952	3377	3503	3398	2040	3152	2503	4.33	3.9	3.9	4.33	5.36	4.94	4.54
							YDL040C	188	117	120	188	253	38	139	181	2.44	2.21	2.37	2.08	2.42	2.27	2.24
							YLR398C	52	39	15	23	94	3		7	1.01	0.97	1.04	0.97	0.95	0.87	0.9
							YNL267W	26		31	14	13			10	1.06	1.14	1.05	0.99	1.21	0.8	0.98
							YMR080C	161		125			10	88	47	1.27	0.78	0.71	0.86	0.9	1.19	1.12
							YJR138W	61	171	84	107	94	56	87		0.8	0.68	0.72	0.74	0.65	0.57	0.73
							YBR034C	137	124			325		167	138	3.05	1.43	0.91	1.22	1.56	3.22	2.23
							YOR294W	167	361			805	140	237	557	1.93	0.52	0.37	0.43	0.66	1.43	1.66
							YPR110C		42		126	18		258	50	5.24	2.93	1.8	1.31	2.04	4.44	4.17
							YOR310C	244	281	289		331	1215	597	543	9.72	3.89	1.95	1.56	2.81	5.25	7.22
							YEL046C	763	1082	680	1640	2617	1681	2375	2075	3.9	2.78	1.76	1.79	2.06	3.04	2.68
							YJR007W		78			155	64	96	125	5.73	4.08	3.68	3.6	4.29	5.98	4.35
							YLR196W	55	47	335	177	164	34	102		3.05	0.91	0.55	0.61	1.13	2.28	2.53
							YNL141W	538	695	614	780	987	667	981	990	2.79	0.56	0.25	0.28	0.36	1.79	2.09
							YDR120C	103	118	269	63	131		233		2.56	0.92	0.54	0.67	0.84	1.31	2.08
							YMR049C	16	29		20	85	34	122	144	2.39	0.53	0.36	0.33	0.55	1.24	1.68
							YDL167C		13			17	10		38	0.87	0.28	0.18	0.22	0.35	0.62	0.71
							YOR243C	70	45	128	96	157	80	85	100	1.61	0.72	0.42	0.48	0.72	1.13	1.37
							YMR205C	963	1076	993	1379	2323	1257	1817	1292	4.74	3.21	2.5	3.13	3.47	5.37	3.47
							YDR101C	156	193		136	394	202	346	322	2.56	0.77	0.43	0.59	0.77	1.82	2.05
							YKL176C		202			366			278	1.07	0.67	0.59	0.69	0.72	0.83	0.99
							YMR108W	85	53	90		192	151	47	188	2.56	1.97	1.25	1.1	1.59	2.51	2.54
							YCL037C	89	75		67	102		224		1.23	0.36	0.26	0.27	0.44	0.66	0.73
							YMR247C		116			143		168	275	1.5	1.03	1.03	1.05	1.02	1.15	1.51
							YOR210W	889	671	177	703	1304	772	1134	967	5.99	6.5	4.38	3.58	3.53	5.03	5.21
							YJR047C	635	525	136	689	1030	635	974	855	7.92	10.81	8.25	7.04	7.18	6.99	7.7
							YDR050C	23510	25018	16229	17850	36916	28907	22172	28516	30.67	49.14	34.27	33.8	34.27	43.37	30.67
							YDR071C	1185	987	368	468	1813	968	434	1048	5.98	10.19	9.71	8	7.78	8.93	6.45
							YER156C	109		19		62		32	105	2.9	1.97	1.28	1.28	1.73	3.33	2.7
							YOL086C	63661	66378	39377	58639	86151	63902	43036	57747	42.69	64.71	46.39	50.77	50.77	69.35	43.89
							YKL060C	90033	120386	65548	86200	145071	117997	93948	104415	153.36	206.61	139.18	141.12	154.43	213.9	141.12
							YHR013C	601		395	786		631	423		1.72	2.4	1.87	1.61	1.62	1.72	1.71
							YKL040C	550	485	384	278	827	417	533	572	1.5	2.28	1.57	1.71	1.7	1.96	1.95
							YDL236W	939	709	192	586	980	572	535	383	2.1	2.52	2.14	1.77	2.31	3.39	2.7
							YBR118W	4702	4271	3471	4254	4218	6166	3526	6371	25.3	36.28	25.48	20.55	20.27	29.26	29.88
							YLR059C	281		160	167			141	297	0.94	0.83	0.68	0.69	0.8	1.05	1.02
							YPR016C	604	882	179		831	358	709	702	3.82	2.7	1.63	1.77	1.91	2.68	2.41
							YOR323C	1352	981	700	716	1269	880	479	722	3.7	3.86	3.41	3.34	3.7	4.37	3.97
							YOR128C	671	614	333	536	675	660	366	484	2.68	1.6	1.64	1.91	2.14	1.84	2.06
							YHR018C	732	596	263	236	959	450	456	479	1.94	2.38	2.41	2.73	3.2	2.16	2.33
							YAR073W	592	435	31	243	427	266	1490	295	1.62	1.21	0.81	0.61	0.83	1.86	1.51
							YGL245W	1192	1112	592	1294	1419	1332	1066	2073	8.98	8.56	7.82	7.19	8.09	9.36	8.92
							YIL015W	331	274	174	284	412	219	232	446	1.5	1.19	1.24	1.43	1.74	1.4	1.29
							YGL202W	5740	5033	3660	4410	5940	4736	3567	3570	4.71	5.61	5.05	5.27	5.12	5.38	5.41
							YLR027C	2211	1530	1239	1247	2537	1574	1595	1471	5.79	6.66	5.41	5.56	6.56	6.94	6.38
							YBR263W	2006	1264	1009	1253	1763	1515	1415	1365	2.53	2.36	2.06	1.8	2	2.75	2.6
							YML126C	3544	3006	2169	3644	2984	3150	2479	3805	7.31	7.36	5.54	5.62	6.73	7.52	9
							YGR054W	466	430	197	375	614	438	304	304	1.73	1.07	1.06	1.56	1.53	1.57	1.49
							YDR341C	635	591	119	360	824	516	387	497	4.79	3.25	1.87	1.44	1.78	3.08	3.68
							YFL022C	1436	1427	550	390	1761	1060	877	1231	3.38	3.4	3.04	2.63	3.77	4.33	4.39
							YER069W	151	121	47	79	63	102	80	72	0.74	0.49	0.59	0.65		0.64	0.93
							YGL027C	131	152	35	60	200	183		65	1.26	1.11	1.25	1.2	1.39	1.27	1.26
							YDR443C	12	29	8		27		22		0.91	0.77	0.82	0.78	0.98	0.69	0.78
							YOL081W	30		12	22	42		30		1.74	1.66	1.73	1.72	1.6	1.7	1.13
							YMR194W	15114	14882	19144	17331	16039	9285	16353	11642	17.39	18.77	11.32	8.88	8.52	10.41	9.72
							YOL039W	8246	6236	5990	5973	10892	8157	4979	6002	36.82	48.24	32.72	20.57	17.66	23.63	28.29
							YDL081C	21702	18834	16132	23526	15238	28117	9737	21510	27.31	37.05	20.7	13.37	12.57	15.26	19.99
							YLR264W	22153	21008	19881	24253	25013	15752	15799	18400	21.78	27.95	19.36	13.31	12.16	13.04	16.5
							YER131W	13763	12393	21198	18941	17383	16186	18930	19672	17.49	26.69	16.78	9.44	7.88	13.26	13.82
							YBL087C	22374	20239	24553	23996	23327	21597	17473	17423	33.07	41.56	27.42	16.53	14.9	21.51	26.49
							YOL040C	106340	116449	104858	120680	107205	103439	92820	86195	55.49	74.25	47.32	28.33	27.75	43.84	41.19
							YDR382W	242	264	282	188	551	366	425	537	84.12	113.33	69.76	46.99	40.35	52.14	66.46
							YGR118W	57331	55271	42021	50314	65891	58566	54025	52335	49.25	70.13	43.77	27.51	27.51	37.84	38.91
							YLR287C-A	1810	1850	1504	1601	3530	1020	2685	2261	30.97	48.94	35.58	28.11	27.34	35.82	25.33
							YDL075W	12461	13289	12273	10634	12815	7304	9661	8772	41.32	49.48	29.42	18.24	16.1	21.54	27.64
							YBL092W	8195	6355	5766	5575	5776	3869	4228	2981	28.78	41.56	26.49	17	13.52	19.52	23.87
							YLR061W	21223	21943	19217	20161	19748	16514	16396	16606	30.84	24.37	17.84	13.24	16.08	22.89	22.58
							YOL127W	15486	15797	16504	16466	15946	13097	15767	12553	23.7	33.29	20.21	13.52	9.97	16.88	17.96
							YLR325C	11706	9210	12350	8497	12365	5588	9067	5040	30.55	37.61	19.88	14.06	15.6	20.72	20.72
							YOR234C	2217	2080	1794	1396	2105	857	1282	863	24.11	25.13	15.91	11.09	10.64	16.35	18.27
							YJL136C	25457	34077	29627	18918	31926	29209	25430	16835	36.43	39.05	24.37	15.86	16.19	20.35	24.71
							YKR057W	10447	11817	12768	18848	20399	11029	9544	18759	37.68	44.81	26.83	18.07	16.98	21.49	27.97
							YPL143W	17523	13803	18640	13980	13162	9336	13404	10155	29.58	36.41	21.65	15.85	15.1	20.06	22.89
							YDR064W	18036	18064	14447	15622	17480	10288	12213	9498	27.31	27.5	16.7	16.13	14.24		13.38
							YKL056C	8610	9901	8744	8324	9947	8663	7855	6552	29.46	33.84	20.26	15.35	13.84	23.27	26.73
							YGL103W	8361	8559	12336	9208	10652	6145	8554	6281	32.85	36.2	27.25	21.38	18.74	18.74	27.63
							YNL301C	14751	13449	15158	13072	15606	9595	12802	6986	14.3	17.36	10.61	7.15	6.58	8.44	9.84
							YIL133C	4591	3722	4630	4609	4778	3603	4237	3040	22.3	23.4	12.46	8.69	10.05	16.1	16.55
							YBL002W	7631	7220	8356	8020	7758	6920	5758	6509	10.55	15.77	11.79	7.89	7.51	11.95	14.02
							YCR031C	9613	5729	9543	9824	9921	11636	11228	9967	36.79	44.98	26.19	18.78	18.78	23.94	25.3
							YHR010W	12739	11315	10745	10801	10077	6412	10007	8187	37.3	45.6	24.61	18.65	17.89	24.61	28.27
							YGL030W	17261	19037	10888	11511	16144	8944	9933	8514	29.71	38.12	22.2	15.17	13.95	20.15	21.45
							YOR276W	572	569	531	388	554	263	649	542	5.46	7.01	4.66	3.55	3.6	5.09	4.82
							YGR034W	5416	5851	8976	5286	5595	2640	4135	3677	30.79	36.86	20.31	14.77	13.59	19.35	23.99
							YGR027C	2517	1372	881	1517	3613	1866	2692	1641	51.64	83.9	53.1	34.55	28.85	38.33	41.95
							YJR014W	703	336	502	631	851	437	813	589	3.42	3.22	2.63	2.4	2.8	3.19	2.92
							YBR189W	12938	12124	11249	11534	12743	9104	9326	7122	13.47	15.37	9.14	6.33	6.33	8.07	9.59
							YNL069C	7206	7053	7978	5936	7491	5274	6021	5375	20.84	25.65	16.46	11.01	11.01	15.47	17.28
							YOR369C	5117	3053	3603	2765	3726	2899	1978	1473	53.8	80.98	45.24	27.47	20.39	29.64	35.5
							YJL190C	19397	17288	14017	14469	16474	10947	9226	8461	36.45	47.77	29.2	16.43	14.6	21.83	27.25
							YHR203C	25589	24557	17235	19561	24127	18577	15618	16186	41.58	52.27	27.06	16.66	17.85	27.44	31.51
							YER074W	25447	24370	18750	15325	22016	12415	16067	9519	20.44	25.69	14.76	8.78	8.59	11.26	14.35
							YGR085C	5662	4526	5406	5249	5693	3548	4190	2478	45.73	61.61	34.18	22.87	19.63	33.94	38.99
							YLR340W	516	400	472	685	686	1338	515	1019	39.32	41.27	24.04	17.35	14.19	19.25	27.99
							YBR048W	13931	15077	13237	14193	14767	8604	10563	9207	12.64	13.93	8.52	5.7	5.39	7.46	9.32
							YNR050C	2029	1882	1169	1033	2765	1686	1341	1310	4.42	3.98	3.15	2.47	2.47	2.84	3.35
							YOR021C	249	153	109	191	181	172	166	176	4.99	3.94	2.25	1.69	2.04	3.88	4.34
							YML073C	1091	954	557	619	1017	440	426	446	29.82	38.53	22.13	14.01	14.3	20.51	21.53
							YER056C-A	17943	15192	19622	12948	19976	9986	15362	8979	13.39	19.88	11.9	7.38	6.56	7.48	9.67
							YDL083C	17318	19382	14074	14036	17640	14459	12141	9770	25.78	29.61	16.54	10.32	12.11	16.2	15.22
							YKL216W	5535	5001	4795	4590	6559	4274	3845	4238	8.93	4.65	1.25	0.72	0.81	2.23	6.05
							YNL067W	784	474	1121	415	652	435	741	289	13.82	19.41	15.88	7.89	7.72	14.82	14.51
							YDR447C	31525	33636	39034	33501	31507	21346	24545	20033	33.98	30.62	19.38	12.27	11.52	18.72	22.42
							YOR063W	17112	15261	17995	16376	18201	13054	17361	13609	37.51	41.33	24.4	14.61	15.77	28.03	28.43
							YMR242C	11315	11172	11950	9981	11900	7004	10272	7772	30.05	36.74	17.99	11.39	12.04	19.83	22
							YLR448W	7928	7743	6156	6282	9595	4416	6363	5401	21.93	21.93	12.25	8.78	8.97	13.4	17.32
							YBL072C	28176	28333	27796	27428	32008	17937	23116	18282	41.1	54.98	28.86	18.52	18.14	25.12	30.5
							YHL001W	747	329	1248	711	87	205	444		19.5	23.19	13.88	9.55	10.16	13.23	15.84
							YER055C	3902	3217	3049	2101	3165	1887	1891	1152	8.22	6.23	3.94	2.79	3.86	4.92	4.43
							YNL255C	1435	1113	2142	1428	326	1432	1761		4.12	4.41	2.64	1.89	2.18	4.09	4.15
							YKL006W	58389	63742	63765	49886	41517	34013	38178	29047	27.12	30.72	17.89	11.64	11.4	17.05	20.84
							YBL027W	17581	20131	22309	21207	21663	18969	20665	20655	29	42.46	24.39	16.2	14.5	21.23	22.29
							YKL081W	265	219	130	200	394	255	345	564	27.58	21.49	13.23	10.24	10.24	13.51	19.91
							YLR048W	17240	21121		17403			10315	9031	20.23	21.38	11.54	7.51	7.3	10.33	14.61
							YDR450W	12090	14283	7169	7620	15634	10905	6513	3772	21.98	29.61	20.5	10.99	10.54	14.7	15.87
							YNL302C	53074	76691	57812	60395	58625	60630	51027	54139	27.65	31.1	19.96	18.24	13.73	12.03	18.24
							YOR293W	5485	3019	4214	3954	4977	2080	4367	2222	18.03	21.89	11.89	7.74	7.22	10.07	11.73
							YDL082W	6364	7000	6619	25996	7146	5659	5749	5065	19.52	24.37	14.79	8.38	9.17	12.7	13.43
							YLR150W	9011	9688	13702	9341	9988	8091	8387	6877	28.06	36.77	24.94	16.57	14.03	15.14	20.26
							YAL003W	32124	38444	31521	31821	40667	44772	24202	28135	25.55	32.12	26.27	16.86	16.4	19.91	23.84
							YOR095C	853	560	333	533	755	578	677	486	3.04	1.49	0.58	0.55	0.7	2.16	2.47
							YMR142C	31331	32098	34012	30590	26116	18276	23785	19412	14.17	19.22	11.35	6.94	6.65	9.09	9.48
							YBR191W	19499	29416		17929	21819	16228	22570	19417	49.18	64.89	38.85	23.59	22.63	34.54	37.27
							YDR399W	3468	3183	2753	3761	4172	3606	2673	3526	7.37	2.28	0.96	1.1	1.7	4.12	3.76
							YPL273W	889	1186	768	1410	1468	1416	1054	1596	3.23	3.16	1.78	1.2	1.49	2.38	2.74
							YGR180C	392	268	329	425	447	484	381	661	9.43	11.22	7.56	5.2	5.2	6.81	8.04
							YML063W	764	760	1563	990	1996	1104	2060	1170	23.66	33.69	18.69	10.88	9.22	14.87	15.39
							YPL117C	2793	3465	3162	3489	4008	2960	4235	3304	2.59	2.34	1.61	1.37	1.59	2.52	2.21
							YGR285C	1158	1617	2389	1745	2045	1178	2130	2462	12.32	12.07	7.53	5.91	6.88	9.34	11.82
							YLR029C	11332	11157	8898	7058	9656	4661	7061	6043	38.4	56.61	28.11	15.38	12.67	22.68	26.41
							YDL136W	37104	30357	34453	29199	38619	22968	32481	20234	21.49	30.18	20.19	12.01	11.6	15.3	17.22
							YHL015W	14871	18202	17021	16031	17366	14671	12620	12054	57.12	87.17	66.06	34.92	30.19	38.74	43.89
							YLR441C	8654	5394	10292	8767	12607	10790	14330	12408	25.88	28.12	16.26	9.81	9.6	15.82	18.17
							YJR123W	39938	54721	28881	33839	49086	38201	27033	22218	52.84	61.97	37.11	24.82	21.61	31.2	34.38
							YDR226W	16742	14938	14053	18540	20189	19509	17064	19372	17	25.59	18.86	15.11	15.64	20.36	18.35
							YBR181C	25626	26453	26342	26064	30289	22120	23739	23040	30.04	45.53	28.02	14.71	14.11	21.39	24.4
							YGL076C	14926	12917	11389	13694	15482	13239	12521	11545	32.06	37.87	18.93	13.11	12.84	17.91	23.15
							YPL131W	11666	11856	8490	9336	13500	10537	8373	7433	48.72	49.06	26.29	16.07	17.11	31.27	36.42
							YDL051W	1750	1794	1452	1954	1956	1997	1846	2073	3.83	2.6	1.84	1.26	1.57	3.07	3.45
							YKL180W	18794	19024	23645	19130	23809	15200	19810	14004	30.67	38.02	23.9	14.41	15.34	22.92	25.09
							YBR031W	52442	54248	69699	41827	1625	33078	32456	30411	32.25	37.82	19.99	14.23	15.79	23.28	22.64
							YLR420W	1405	1241	900	790	1329	583	731	641	2.61	2.49	1.64	1.62	1.54	1.8	2.17
							YLR355C	14090	12671	9676	11385	13147	10952	8840	9734	10.01	6.42	3.9	4.7	6.42	5.99	6.42
							YMR116C	16032	21870	10989	12082	18437	11917	7863	8095	52.33	55.31	29.85	22	18.89	20.39	29.85
							YNL096C	15225	12772	11155	14566	12386	9122	8717	8414	18.59	18.2		7.44	9.49	13.05	13.89
							YGL123W	12875	13371	12269	11983	15640	9166	10768	8115	62.41	74.22	42.92	28.12	26.24	36.85	45.06
							YBR249C	2051	2106	1239	2753	2202	2690	2322	2742	6.47	6.47	3.49	2.27	2.27	4.21	4.84
							YOR096W	21900	20733	19331	18145	21222	13463	13395	12894	30.86	37.99	22.9	13.62	13.62	20.64	25.06
							YHR025W	4302	5165	5175	6185	4860	5665	5960	6085	6.28	5.98	3.95	3.89	3.84	5.03	6.64
							YLR058C	3256	1861	1946	2518	4075	2484	3509	2991	14.44	5.63	3.32	4.18	5.91	7.22	7.79
							YAR071W	315	320	250	117	409	248	214	77	0.93	0.46	0.22	0.2	0.32	0.54	0.32
							YBR092C	288	73	180		223	180	70	82	2.85	1.39	0.68	0.68	0.91	1.26	1.06
							YBR121C	3273	2453	2665	2765	3641	2054	3123	2663	11.11	9.68	6.34	5.44	6.65	7.91	9.88
							YJR016C	843	689	434	530	1162	801	522	646	3.91	2.61	1.37	1.17	1.41	2.54	3
							YGR185C	1864	1453	1425	2107	2741	2008	2574	2390	4.01	3.56	2.68	2.24	2.9	2.72	3.82
							YLR359W	4278	3228	3311	2881	4358	2079	2562	1821	6.62	3.91	1.98	1.92	2.58	3.24	3.91
							YLR060W	3483	2676	2821	3327	3474	2340	3091	2448	5.55	5.03	3.82	3.21	3.76	5.1	5
							YDR023W	6748	5644	7721	6369	7438	6067	5941	5890	9.86	9.39	6.11	3.46	4.44	6.51	7.32
							YBL024W	455	380	569	464	534	334	483	613	2.09	0.96	0.75	0.71	0.9	1.31	1.36
							YOR168W	980	889	946	708	1110	676	619	712	4.99	3.43	2.69	2.25	2.69	3.34	3.73
							YLR432W	2912	2426	1804	2488	2669	1947	3130	1281	2.95	2.13	1.24	1.03	1.24	2.71	2.81
							YJL138C	1038	1003	938	942	674	957	679	596	16.52	16.98	10.6	8.26	8.91	14.99	15.52
							YMR120C	1943	1292	1488	2291	2847	1808	2818	3048	7.91	2.94	1.27	1.66	2.54	2.21	2.14
							YBL076C	1796	1611	1164	1416	2075	1292	1431	1375	3.9	1.87	1.72	1.52	1.83	2.61	2.9
							YHR019C	1972	1171	1648	2117	2845	1072	2431	1811	6.95	6.53	4.1	3.2	3.2	4.95	5.42
							YMR131C	111	188	164	125	214	135	282	197	3.28	1.64	0.72	0.75	1.02	2.33	2.59
							YDR234W	132	108	161	111	391	92	145	281	1.85	0.82	0.48	0.54	0.52	1	1.4
							YDR111C	189	120		184	282		339	211	0.74	0.41	0.31	0.28	0.33	0.44	0.45
							YOR335C	1954	1757	1428	1506	2417	1355	1808	1518	3.02	1.63	1.27	0.97	1.24	1.97	2.26
							YDR037W	5993	5267	6080	6368	6515	5149	6275	5564	7.93	6.09	3.73	2.69	3.24	6.9	6.35
							YIL078W	1766	1033	956	1247	1773	990	1374	1032	16	13	9.92	7.52	8.17	12.47	14.73
							YGR264C	426	392	353	405	701	462	534	757	3.65	2.04	1.21	0.99	1.32	1.9	2.41
							YLR249W	332	197	301	218	164	447	100	285	39.96	18.77	9.58	6.41	9.58	29.26	30.29
							YDR385W	1668	1349	1283	923	1362	2171	868	3627	23.23	17.85	11.38	10.25	11.14	16.31	18.61
							YDL077C	53	31	46	102		32	77	34	0.95	2.32	0.65	0.63	0.69		0.58
							YCL030C	740	658	894	1035	1215	688	887	583	3.79	1.67	1.18	1.02	1.25	1.25	1.67
							YPL160W	4240	3638	3505	3212	4222	2412	2981	2884	4.09	2.94	2.42	1.85	2.34	2.86	3.49
							YOL123W	153	156		186	531	296	206	369	2.39	2.08	1.53	0.98	1.08	1.29	2.2
							YGR061C	3401	3049	2040	2470	2742	1763	1729	1621	2.85	1.28	1.17	0.85	1	1.16	1.41
							YJR031C	31	50	41	63	76	34	85	83	0.99	0.68	0.62	0.48	0.62	0.48	0.97
							YJL130C	66	49	66	88	101	31	74	95	4.83	3.81	3.61	3.58	2.91	3.95	4.35
							YLL050C	6316	7069	6939	6275	8658	7400	7679	7101	15.07	27.35	25.69	26.42	28.51	29.51	23.64
							YDR519W	876	768	274	726	894	634	1057	745	3	3.77	3.46	4.42	6.2	9.14	7.17
							YDL046W	2135	1024	2046	2332	1692	1423	1507	1181	5.44	12.51	16.73	16.5	18.18	10.3	7.44
							YPL059W	1444	1264	1848	1703	1212	1591	1512	1891	3.02	5.33	5.4	5.67	6.08	4.9	3.87
							YGR037C	2028	2884	1083	1970	4782	4134	3188	8837	12.7	24.54	25.76	25.93	25.58	34.46	26.11
							YDL125C	3624	2779	1734	2730	3108	2129	2005	2374	7.3	15.87	16.55	15.12	15.66	26.15	13.26
							YML078W	4005	4073	6274	5326	4473	4849	4484	4863	5.96	9.54	9.35	10.09	11.27	11.35	8.03
							YKL192C	895	1551	607	826	1316	2072	1631	1158	3.72	8.09	10.38	10.16	9.95	7.34	4.88
							YER062C	242	91	171	140	381	141	563	439	3.53	3.94	4.92	5.94	7.94	18.12	6.96
							YJL217W	940	529	555	823	1125	910	879	580	3.56	8.07	11.1	12.4	11.49	6.93	5.59
							YML028W	1581	1686	662	1493	3437	3656	3127	5950	33.03	122.41	137.72	156.02	144.56	142.57	103.65
							YML092C	810	582	264	670	829	655	1133	1199	3.65	6.53	7.04	7.34	7.92	9.42	5.26
							YJR009C	85355	77143	62440	64942	89246	61676	51073	50921	61.55	106.43	93.29	113.28	104.96	136.59	72.19
							YJR025C	996	697		641	1622	835	1140	1204	1.68	3.45	4.14	4.17	3.86	5.77	4.43
							YJR139C	8094	6996	5234	7620	8144	6439	6304	7101	7.58	9.01	8.35	9.39	11.09	11.73	10
							YLR301W	2613	1932	1168	2137	2214	1717	2223	1872	4.5	6.73	6.63	6.28	6.92	7.94	7.36
							YGR253C	914	1045	455	737	2353	1132	1534	872	3.8	6.38	7.49	7.59	7.54	9.15	5.71
							YDR368W	1032	976	822	1089	1732	1156	1414	1569	2.24	5.32	6.28	5.94	6.92	6.03	4.57
							YCR012W	59754	71575	55471	76244	89905	82716	75807	77409	110.01	192.88	203.87	226.21	267.16	290.33	171.44
							YKL152C	24796	32331	30051	36643	40442	33986	37464	38113	122.05	212.51	179.94	177.46	203.85	259.82	161.05
							YNL160W	1677	1025	885	1625	1846	793	1806	629	7.51	32.87	58.44	76.05	61.34	36.98	13.92
							YBR035C	891	1193	666	781	1393	1044	1262	1301	2.71	5.02	5.19	4.13	4.88	3.78	3.33
							YGR254W	67299	65974	48500	74143	109052	90034	91128	78644	41.85	68.45	54.83	61.69	60	88.46	49.08
							YHR174W	219779	207634	184593	216965	304130	267333	220562	234131	226.55	357.97	320.39	338.66	309.48	531.41	269.42
							YMR314W	845	904	345	652	1654	1087	1098	1331	2.92	6.44	7.25	6.86	5.57	7.1	4.82
							YOR362C	435	756		257	1262	774	401	391	5.28	12.83	14.94	15.47	13.19	14.24	8.58
							YGR135W	660	659	308	535	1327	784	1053	1139	4.25	8.44	10.68	11.36	9.36	11.93	7.04
							YBR111C		295		301	363	236	215	324	3.6	6.99	8.61	9.23	8.98	8.37	5.37
							YHR163W	731	808	364	489	994	560	1052	923	4.22	15.11	15.86	13.34	14.49	14.59	10.76
							YBR221C	616	906	688	705	1219	722	1473	731	7.79	10.95	10.57	11.9	13.29	11.73	10.43
							YER023W	1781	1507	1755	1672	2032	2256	1947	2617	2.52	3.46	3.25	2.97	3.56	3.44	2.89
							YMR226C	4830	3438	3693	4362	4875	3561	3313	3608	3.6	5.84	6.76	6.85	6.53	8.98	6.09
							YHR008C	2130	2391	808	2483	4317	3245	2521	3388	3.35	11.04	9.81	6.94	9.88	11.11	4.71
							YJR148W	3608	3392	2452	2838	4300	3861	3255	3259	6.93	11.02	11.73	17.41	24.12	20	14.54
							YPR103W		111			152	164	64		5.91	12.49	14.15	14.65	15.92	16.37	9.67
							YLR231C	748	546	233	778	785	460	742	790	0.92	1.07	1.07	1.22	1.66	1.84	1.92
							YBR026C	222	96			201	90	113	201	1.33	3.07	3.8	4.07	3.13	2.56	1.62
							YJL167W	4731	3460	4013	3787	4888	3343	4040	3838	6.64	10	9.79	9.46	9.93	10.94	9.93
							YHR183W	5654	5743	5342	7107	9284	8745	10363	10993	10.88	25.53	30.36	23.49	22.38	26.98	42.34
							YER178W	1005	744	841	1034	1523	962	1244	986	9.38	11.87	12.46	14.82	16.79	15.88	13.26
							YMR099C	768	605	551	368	1118	658	892	1063	1.74	2.67	2.56	2.54	3.15	3.15	2.63
							YNL079C	552	478	429	384	866	586	752	1385	8.24	12.23	14.34	14.54	13.11	18.28	14.54
							YFR044C	4220	3396	3303	3513	4919	3945	3191	3445	6.54	9.78	10.12	12.2	11.95	11.39	9
							YOL038W	569	299	325	585	739	472	662	431	5.1	9.79	12.05	11.56	12.92	11.81	8.58
							YEL047C	1457	1238	1226	1213	1601	1050	1066	1017	1.41	1.73	1.55	1.61	2.07	2.64	1.84
							YOR007C	4190	3838	4203	4671	5063	5979	5696	6546	7.42	17.16	20.98	20.83	22.48	23.77	19.44
							YBR286W	3895	3238	1892	2206	4216	2582	2343	2728	8.52	12.74	15.36	21.28	23.78	21.58	13.19
							YLR303W	3330	2903	2028	3174	5241	4233	4717	5780	14.89	66.07	94.09	102.25	108.08	112.67	59.96
							YER177W	3223	1735	2389	2583	2888	3365	2613	3538	28.3	51.72	59.83	60.66	72.14	68.25	44.1
							YNL071W	1244	1032	1053	1103	1694	1419	1335	1137	3.86	5.49	6.81	7.25	8.86	7.25	5.73
							YOL083W		143	152	169	145		216	123	0.75	2.04	2.51	3.64	3.93	2.32	1.94
							YCL043C	2565	2477	1679	2560	4068	3646	3764	4556	10.88	17.68	21.03	34.87	42.34	50.35	36.86
							YOR117W	213	85		92	138	298	86	327	2.51	4.71	5.45	5.6	6.13	6.13	3.93
							YCR088W	669	650	560	746	813	851	841	660	1.32	1.88	2	2.36	2.75	1.96	1.75
							YIL041W	1793	1251	2413	1359	1777	1220	1700	1409	2.79		4.17		4.03	4.82
							YMR186W	457	368	276	123	439	966	437	618	14.23	36.77	47.52	37.8	42.24	32.23	38.86
							YNL208W	538	511	1093	420	863	1963	1604	2559	4.93	22.16	32	27.1	77.18	84.46	35.76
							YHR074W	190	143	129	140	344	117	90	171	0.97	1.08	1.14	1.41	1.38	1.31	1.18
							YLR429W	162	220	139	177	305	120	377	413	1.98	2.26	2.56	2.69	3.11	3.4	3
							YNL123W	56	37		31	63	75	56	42	2.03	1.45	1.71	1.84	2.07	2.68	2.4
							YEL037C	1061	801	566	765	1287	731	1150	704	1.48	2.3	2.69	2.66	3.29	2.81	2.01
							YFL010C	23458	27454	31721	32553	28716	34845	31997	30272	2.18	3.78	3.85	4.49	4.37	4.49	3.72
							YMR276W	478	279	329	243	536	303	226	234	3.16	5.9	5.5	3.58	6.41	8.94	5.35
							YKL157W	325	209	89	216	553	358	337	320	2.6	2.49	3.43	4.13	4.31	4.25	3.65
							YOR027W	1031	1035	997	652	1077	1210	889	1252	3.09	11.51	14.18	8.79	8.03	7.29	7.7
							YJL020C	139	109	156	130	100	185	152	112	0.92	1.46	1.7	2.1	2.33	1.19	1.15
							YFL028C		74			156	84	112	162	2.34	3.17	3.17	2.67	2.8	2.88	2.61
							YJL214W		241			1117		606		0.33	0.49	0.56	0.65	0.28	0.31	0.29
							YKR066C	181	45	115	192	226	198	311	234	1.66	4.39	4.07	3.98	2.61	1.75	1.81
							YIL062C		71			422	193	74	275	3.58	7.84	8.46	7.31	6.73	5.28	3.78
							YMR105C	88	169	196	559	1336	1049	481	457	0.82	8.14	14.67	12.17	7.59	1.28	1.44
							YFR053C	47	219	234	946	1901	1178	1318	1405	3.59	42.34	77.92	44.76	26.25	7.49	4.77
							YNR001C	247	219	383	416	722	640	433	683	2.05	6.09	6.09	5.72	4.78	2.49	1.75
							YML120C	1107		1725	2624	2142	2148	3541	3509	0.7	1.7	1.49	1.45	0.87	0.81	0.77
							YJR125C	61	106			131			222	2.84	5.12	3.45	5.19	5.26	2.84	3
							YNL098C	240	362	581	676	527	585	416	711	3.13	6.08	5.52	6.61	5.44	3.31	2.94
							YHR037W	104		123	106	285	154	190	203	1.33	1.48	1.44	1.97	1.39	1.42	1.17
							YGR130C	16	29	24	48	222	88	153	143	1.17	2.12	2.78	2.58	2.8	0.98	1.42
							YBL063W		109	93	223		238	315	447	0.66	0.8	0.9	0.79	0.8	0.54	0.69
							YBR136W	21	3	16	11	34		16	25	3.2	4.55	4.91	4.84	5.26	2.8	3.09
							YBL047C	26	90		24	211	125	100	130	3.07	4	4.11	4.19	4.4	2.41	2.77
							YGL040C	860	417	250	515	941	561	886	651	2.4	3.3	3.51	3.61	3.19	3.15	2.38
							YJL052W	23180	968	1088	13746	19855	14224	10342	8834	38.54	64.82	71.92	92.3	80.91	102.42	51.21
							YGL011C	446	284	58	186	1009	478	456	575	8.17	17.03	18.13	18.26	18.01	17.51	11.63
							YDR174W	378	428	215	339	533	426	554	767	6.67	9.05	10.32	8.86	10.39	9.7	7.15
							YOR332W	1065	865	720	657	1722	1186	936	1947	5.48	8.85	8.55	7.54	7.92	8.31	6.89
							YGL157W		120	22		293	264	208	228	2.5	3.95	4.01	4.97	5.43	6.33	4.32
							YDR148C	549	308	155	710	673	488	485	1094	1.04	1.84	1.68	1.84	1.64	1.16	1.09
							YOR232W	266	401	168	357	735	383	496	747	3.78	5.57	6.05	5.05	4.62	4.75	3.67
							YGL221C	493	552	63	319	968	485	664	648	2.44	3.27	3.29	3.31	4.05	4.59	3.8
							YNL045W	201	88	33	160	240	227	183	468	2.09	3.04	4.07	4.61	4.18	3.28	2.82
							YOL057W	30	121	11		126	168	60	166	1.17	1.01		1.13	1.58	1.53	1.6
							YOR151C	93	53	28	142	167	134	115	186	4.28	4.31	4.46	4.25	5.12	4.25	4.28
							YJR090C		81	68	100	118		101	105	1.11	1	1.22	1.07	1.12	0.99	0.98
							YBL007C	28	16	5		32			35	2.06	2.12	2.8	2.95	2.68	1.9	1.96
							YHL030W	22	20	4		36	20	45		1.28	1.71	2.46	2.76	3.13	1.97	1.25
							YJL121C	1152	390	1320	1042	1664	1018	1566	1457	2.68	2.15	1.74	1.68	1.64	2.38	3.14
							YOR251C		26			129	48		144	1.29	1.3	1.06	0.97	1.19	1.68	1.68
							YDR298C		52			193	61		308	3.15	5.57	4.59	3.38	3.18	3.5	3.09
							YKL214C	38	54			114	21	203	156	0.9	1.04	0.86	0.94	0.72	1.03	0.79
							YDR418W	1567	1561	2189	3376	4175	2645	9999	34324	39.74	51.72	25.5	18.67	19.87	28.3	29.09
							YHR128W	335	1325		1294	3075	1855	1840	2521	4.51	3.51	2.21	2.3	3.02	3.79	2.84
							YPR073C		71			467	530	414	848	1.61	2.33	2.14	2.1	1.62	1.89	2
							YBR101C		73	105	115	745	587	485	399	1.63	4.55	3.77	2.14	2.74	3.11	3.45
							YML001W		84			234	175	367	163	5.31	8.44	8.62	6.31	7	7.51	6.62
							YLR192C		93	208	741	843	541	499	1219	4.31	5.65	5.38	4.53	4.69	5.73	5.31
							YDR469W	103	152			961	234	412	258	1.16	1.11	0.93	0.86	1.01	1.11	1.13
							YPL237W	71		48	225	189			174	6.93	7.74	5.36	4.24	4.45	5.87	5.99
							YGL067W		54			163	52	173	141	1.26	1.35	1.16	1.14	1.37	1.41	1.31
							YHR049W	196	334	286	757	952	423	957	878	3.75	5.49	4.74	3.22	3.04	4.98	4.68
							YGR155W	224	393	205	791	1372	996	2190	2409	7.95	10.48	8.28	7.21	7.95	10.48	8
							YIL138C		22			176	160		86	3.35	3.88	4.01	3.42	3.42	3.33	4.12
							YHR069C	84	56	94	213	171		185	194	1.69	0.91	0.68	0.76	1.05	1.83	1.81
							YDR035W		103		211	757	343	603	962	3.16	3.03	2.69	2.57	3.23	4	2.97
							YML074C	430	265	438	988	888	1169	1413	1678	4.9	2.93	2.7	2.4	3.49	4.06	5.32
							YBR025C	44	77		71	93	270	187	236	9.88	12.86	10.09	7.14	7.24	10.67	11.67
							YFR006W	5	117			134	99	63	260	1.61	2.4	2.34	2.24	2.3	1.64	1.69
							YPR163C	64	65	230	418	299	249	432	679	4.86	3.87	2.37	1.63	2.05	3.44	4.26
							YPR145W	1795	2997	2580	3363	4040	3462	3885	4917	8.48	9.22	7.86	6.84	6.99	6.13	8.91
							YGL043W		19	20	78	110		60	132	1.55	1.35	1.17		1.44	1.51	1.5
							YIL021W	91	15		136	199	66	238	192	2.35	2.52	2.66	2.24	2.48	2.24	2.36
							YPR033C	153	140	187	275	381	155	347	507	4.94	4.18	2.94	2.52	2.86	4.21	5.22
							YDR502C	19	289		625	1540	412	2308	761	2.63	4.33	3.42	2.98	2.56	3.47	2.74
							YLR335W	11	40	27		72	60	50	125	2.13	1.66	1.52	1.22	1.6	1.45	1.9
							YPR180W		64			155	60	202	336	0.8	0.91	0.99	0.93	0.98	0.89	0.92
							YPL070W		24			66		170		0.89	1.01	1.11	1.05	0.91	1.09	0.98
							YKR028W	8			27	9		51		1.16	0.79	0.78	0.76	0.89	0.77	0.91
							YER103W	34	67	31	139	4383	3707	4853	4715	2.38	11.56	19.04	11.4	9.79	12.92	10.06
							YLL029W	6			10			43		1.03	1.26	1.19		1.45	1.22
							YGR240C	1038	1789	1990	2338	3653	2073	3085	2450	7.41	4.82	4.23	4.23	4.96	7.73	5.28
							YHR020W	8	51	36	56	87		95		5.15	2.98	1.44	1.08	1.49	3.19	3.62
							YDL060W	13	28	122	93	52			114	2.04	1	1.06	0.57	0.87	1.2	1.63
							YFR038W	17	34		39	34		93	40	0.68	0.39	0.36	0.74	0.43	0.51	0.61
							YDR127W	62	116	66	85	342	239	114	263	3.02	2.54	2.36	2.2	2.24	2.39	2.56
							YJL076W	72	12		65	85			59	0.9	0.47	0.4	0.42	0.5	0.53	0.78
							YDL145C	27			48		43	51	90	3.6	3.33	3.57	3.72	3.91	3.45	2.8
							YDR464W	45	11	27	38		34		58	1.29	0.88	0.82	0.88	0.86	0.82	1.08
							YDL171C		27	26	81	342	126	205	291	2.09	1.38	1.23	1	1.25	1.15	0.99
							YOR341W		16	25	12	59	28	149	194	2	0.6	0.52	0.74	0.82	1.32	1.41
							YPL231W	266	401	315	685	955	686	1100	1538	6.44	4.31	3.75	3.09	3.99	4.75	5.49
							YDR002W	539	669	556	442	1554	921	1195	1290	12.05	18.39	16.01	11.72	11.48	14.13	14.43
							YER030W	145	256			457	299			3.2	5.06	5.66	5.17	6.23	4.38	4.2
							YAR053W	153		101	225	99	219			0.45	0.38	0.38	0.43	0.44	0.43	0.42
							YLR406C	451	99	985	391	238	191	569	428	15.82	14.36	11.91	9.95	8.78	7.91	8.31
							YDL121C	521	290			1255				1.81	1.9	1.5	1.45	1.21
							YBR009C	1795	1151	3018	2295	2913	1596	2801	1988	15.61	28.33	19.22	12.95	12.33	17.32	19.76
							YBL001C	2019	622			1448				3.48	5.81	5.54	5.2	5.89	5.54	4.23
							YGR063C	1409	770		1164	2344	1057		664	2.61	3.69	3.26	3.35	2.9	3	2.59
							YDR328C		138	619		484	618	1059	1038	3.97	7.45	6.76	5.81	5.93	5.53	4.85
							YPR052C	286				588	470			2.9	3.43	3.47	2.88	3.35	2.94	2.61
							YIL053W	4792	4272	4256	3964	5816	2823	4333	4122	17.56	12.33	7.38	10.73	17.08	42.93	20.73
							YEL034W	2475	1712	2909	2982	5272	2805	4552	4445	17.12	25.24	20.36	17.48	16.43	15.98	17.48
							YHR021C		6113	2887			2827			52.46	47.61	35.09	29.31	30.34	39.21	36.08
							YER146W		578	512		323				2.61	3.57	3.28	2.8	2.82	2.5	2.59
							YNL135C	2575	3071	2914	2503	3471	2704	3676	3584	13.82	19.41	15.88	14.41	14.81	14.41	12.9
							YPL211W		18		213				491	4.13	2.08	0.99	0.83	1.15	2.82	3.57
							YDR454C	2609	2762	2051	2928	4306	3065	4090	4481	7.24	9.49	7.76	5.23	5.72	7.76	9.3
							YDL110C		139			266	212			1.53	8.32	11.13	7.93	7.87	4.46	2.92
							YLR179C	664	591	254	74	1192	539	522	642	3.32	4.83	4.26	4.35	4.26	5.28	5.51
							YHR051W	170	171		25	316	172	475	368	3.23	6.72	5.46	3.92	3.94	3.03	2.93
							YPL111W		65			123	206	420	620	1.73	2.24	2.3	1.78	1.42	0.78	1.92
							YDR045C	230		96	57		256			3.33	2.96	2.52	2.09	2.4	3.77	2.9
							YPL271W	1051	863	1279	1607	752	1467	1784	1569	4.11	8.1	6.09	4.95	4.28	3.78	3.43
							YNL004W	116	70		139	234			82	1.26	1.26	1.01	1.14	1.23	1.23	1.31
							YMR042W	62		336			38	335		0.59	0.28	0.28	0.55	0.43	0.62
							YGL187C	180			642	267	742	395	185	4.23	8.76	5.78	3.21	3.3	2.97	3.1
							YLR271W	268	375			684	513			0.69	0.79	1.04	1	1.1	0.7	0.76
							YNR046W	865	729	3882	1197	1050	610	996	478	1.75	1.19	0.79	0.81	1	1.42	1.59
							YGR114C		873	1991	1380			1787		1.53	1.31	1.21	1.09	1.14	0.92	1.21
							YIL051C	5864	4637	4396	4192	6070	4806	4774	5667	12.67	22.36	22.83	22.67	19.33	17.06	11.49
							YPR062W			1168	664	1179	841	830		6.15	7.57	5.31	4.59	4.47	5.13	5.24
							YDL055C	2095	2743	2230	2136	5927	3242	5201	4421	11.72	14.73	10.78	12.65	17.52	21.86	18.64
							YMR303C	29				147	46	59		11.92	16.4	12.86	13.69	14.88	20.33	12.17
							YFL014W			48	575	3950	4184	4275	5886	2.83	48.53	247.42	208.05	290.18	208.05	56.92
							YLR167W	3190	2199	4976	3412	3680	1828	3063	2412	26.75	46.25	33.16	21.43	16.81	20.27	21.88
							YLR074C		187			211				3.08	1.45	1.08	1.26	1.6	3.41	3.1
							YEL026W	2558	2116	1006	5031	3320	3755	4362	6635	13.19	10.56	5.54	4.09	6.19	12.91	12.39
							YGL106W		177			299	203			5.85	8.27	7.94	6.67	6.54	6.67	6.63
							YLR038C	477	1232	675		1813	1219	1916	1375	4.99	8.88	7.62	5.21	4.66	4.26	4.35
							YDR397C	324	533			838	358	598	366	1.77	1.54	1.36	1.4	1.18	1.84	1.85
							YDR279W		40			35				0.58	0.42	0.39	0.32	0.45	0.49	0.61
							YGR187C	34	8			33				1.74	0.63	1.74	0.49	0.65	0.94	1.39
							YFL045C	4684	4351	3295	4134	5879	5146	3024	3884	8.54	11.51	8.31	7.28	9.03	14.36	16.5
							YBR252W	156	66			33				3.34	3.18	2.23	2.07	2.2	3.5	3.8
							YDR304C	7207	5721	8259	7014	5984	3392	5888	5038	5.81	9.77	9.77	9.91	9.84	9.18	6.91
							YLR208W	412	440		157	619	511	507	571	3.75	4.43	4.25	3.86	4.85	5.57	4.25
							YER159C	979	437		634	1016	677	1261	773	2.25	2.3	2.27	2.19	2.05	2.37	2.85
							YJR069C	264	70	441		301	174	160	144	1.76	2.1	1.65	1.46	1.59	2.33	1.94
							YHR029C	110				358	351	299	524	0.72	1.63	1.81	2.04	2.11	1.87	1.52
							YOR136W	1840	1443	1777	1606	2025	1209	1626	1216	5.75	10.95	9.8	8.41	7.69	6.07	4.67
							YEL003W		79			80				3.87	4.32	4.03	3.48	3.76	4.03	3.95
							YDR308C	384	203	364	93	330				1.21	1.59	1.28	1.21	0.97	1.22	1.05
							YOL067C	28	109			98		42		0.38	0.28	0.38	0.47	0.52	0.51	0.38
							YML004C	56	82	218		134			35	2.81	5.71	8.3	9.4	9.8	7.63	4.57
							YCR051W	1321	957	847	547	732	1347	729	773	1.83	2.11	1.44	1.61	1.7	2.81	2.9
							YLR009W		202	361		246	104		94	3.27	1.22	0.72	0.79	1.11	2.36	2.33
							YNL244C	246	302	842	111	285	492	592	919	11.7	13.82	12.03	8.39	10.92	15.66	11.62
							YBR053C	7	42			38	42	11		1.28	3.24	4.07	4.98	4.98	3.43	2.15
							YLR075W	33326	35644	37287	46616	39946	41350	40933	44369	64.25	109.56	81.33	54.03	53.28	64.7	61.63
							YNL037C	2259	2108	2255	2341	2469	2566	1468	1608	2.19	2.91	2.6	2.53	2.75	2.66	3.14
							YDL004W	1914	1793	3110	1728	2078	1294	1258	1403	4.04	7.13	5.48	3.77	3.44	2.78	3.39
							YDR487C	6255	5623	7351	6141	7062	7954	8113	8694	2.55	3.81	3.37	3.46	4.35	5.9	4.2
							YHL033C	418	151	136	103	430	151		15183	17.21	20.33	11.84	7.39	7.04	12.87	15.51
							YGR214W	95		16173		19896	15070			21.97	24.54	14.69	8.56	9.43	12.7	16.88
							YDR381W	450	158	1655	2461	713	262	2195	2931	5.22	9.02	7.12	5.44	5.36	6.38	5.83
							YIR034C	570			985			164	199	1.44	1.63	1.82	1.82	1.96	1.77	1.38
							YML079W	136	59			230	325	20	86	1.12	1.63	1.77	1.73	1.94	1.8	1.44
							YPR191W	38	98		127	176	151	217	310	2.56	5.33	4.04	2.92	2.63	1.85	1.91
							YMR073C		61				58		72	1.06	1.26	1.21	1.18	1.22	1.14	1.38
							YDR068W		95	21		63	122			1.04	0.95	1.09	0.97	1.1	0.76	1.05
							YKL024C		63				59	110	1011	3.25	3.09	2.46	2.41	2.93	5.06	4.62
							YAR015W	191	118		70	141	157	314	367	4.94	2.49	1.67	1.53	3.21	2.82	3.26
							YNL113W	674	319		104	1000	1157	1133	1615	3.96	2.14	1.34	1.47	2.09	3.85	3.96
							YLR200W	2018	1585	1490	2374	1989	1694	2980	3532	1.18	1.38	1.28	1.44	1.3	1.67	1.35
							YMR083W	133	207	118	197	288	44	256	738	13.8	15.74	12.18	11.05	12.7	19.51	15.74
							YDL168W	131	162		23	412	431	229	503	2.08	3.52	3.7	3.11	3.62	4.34	3.88
							YBL021C	150			290	593				0.75	0.99	0.99	1	0.8	1.09	0.86
							YMR200W		87	182			501			1.49	2.08	2.01	2	1.93	2.19	1.85
							YHL034C	164	132	230	373	512	81	233	259	7.31	13.63	15.44	24.4	17.86	14.81	9.57
							YLR178C			43		685	253	316	525	0.96	6.3	24.02	16.07	17.83	6.48	2.54
							YDL201W	17			57	179	48			1.8	0.87	0.67	0.8	0.85	1.32	1.48
							YGL246C		24	101	76			39	153	1.53	1.21	0.91	0.95	0.99	1.52	1.43
							YNL055C	123				234	236			25.38	62.49	71.79	76.41	67.44	51.47	46.39
							YNL032W			152		42		263	148	2.03	2.19	1.98	1.75	1.71	1.73	1.94
							YMR079W	603	363	236	641	576	895	463	988	4.71	4.34	3.36	3.36	3.91	5.05	4.28
							YJR070C	1649	1146	488	1201	1779	1345	1402	1659	4.18	2.05	0.75	0.75	1.47	4.06	4.01
							YJL177W	84	175	561	326	56		61	29	16.3	18.09	9.43	6.18	6.35	10.25	11.93
							YKR076W			29	150	292	263	368	327	0.39	2.83	5.48	10.5	8.96	3.44	1.28
							YPL171C			85	440	719	384	687	268	0.69	2.14	2.26	2.06	1.95	1.68	1.41
							YHR144C	44				193		135		1.17	0.78	0.62	0.67	0.78	0.97	1.17
							YHR193C	2891	3085	4534	3876	4381	2389	3381	3557	16.37	25.15	18.16	12.58	11.26	14.05	12.4
							YNL036W		506			1247	504			1.26	3.75	5.2	3.29	3.15	1.66	1.45
							YDR012W	723	649	796	295	43492	199	519	359	20.41	24.1	14.94	10.42	10.64	15.68	16.12
							YDR408C	104	349	500		238				2.19	2.08	1.58	1.37	1.42	1.63	1.54
							YCL009C	482		427				159	367	3.62	4.05	3.09	2.54	2.49	2.9	3.09
							YER009W	459	1016	437	1328	4727	5073	312	3381	7.54	11.99	8.6		7.59	7.7	7.33
							YLR025W		67			90				1.62	1.94	1.94	1.8	1.81	1.25	1.27
							YPR035W	3351	2630	2284	1950	2586	1149	1473	746	11.15	7.83	6.67	9.12	9.84	23.08	14.51
							YJL140W	105			71	130		130	152	2.14	2.76	2.84	2.45	2.37	2.09	2.23
							YKL093W		70	105		14				0.25	0.37	0.47	0.42	0.37	0.36	0.28
							YOR120W			62	154	752	927	704	693	1.15	6.6	9.2	9.33	8.18	5.95	2.32
							YHR063C		109	65	13	89	69			3.09	3.86	3.63	3.07	3.78	4.08	4.2
							YGL148W	386	88	66	255	435	468	1231	4231	4.61	5.33	3.44	2.72	2.9	4.97	4.97
							YML068W		241		379	390	383	170	203	0.5	0.56	0.54	0.57	0.51	0.39	0.52
							YOL140W		10				13			0.83	0.55	0.43	0.51	0.47	0.81	0.92
							YOL147C	511				554	139			2.19	2.02	1.49	1.79	2.02	2.42	2.49
							YPL037C	976	1336	1130	923	2534	1443	2267	2922	18.37	28.43	19.69	16.56	16.67	19.15	17.5
							YHR132C		335			552	130		406	2.25	2.1	1.89	1.95	2.07	2.25	2.07
							YHR179W	18220	16895	18173	21481	20503	22203	20675	21857	10.23	29.55	16.62	12.69	19.77	53.27	57.89
							YOL041C	586	455	915	855	618	288	632	497	2.5	0.72	1.1	0.5	1.04	1.51	1.64
							YBR028C			172	241			215		0.93	0.93	0.84	0.8	0.86	0.84	0.96
							YCR060W	110	289			81				1.17	1.68	1.72	1.47	1.47	1.85	1.4
							YNL064C	350	233	396	378	565	418	301	613	7.58	18.29	16.26	9.94	11.49	15.06	14.45
							YBL015W		27	44		84	83	78	52	1.61	2.63	2.73	2.15	1.22	1.35	1.27
							YLR238W	234			163	158				0.54	0.51	0.59	0.56	0.59	0.4	0.55
							YLR195C			37		545	338	378	450	1.4	1.5	1.37	1.36	1.64	1.95	1.89
							YHR064C	734	543	384	655	961	631	899	1426	8.29	7.36	5.14	3.97	4.57	7.89	10.13
							YHR208W	1979	2640	1418	2510	3018	1940	2642	2292	7.66	5.88	4.05	3.75	5.8	8.21	8.86
							YDL066W	1350	1167	1465	1056	1459	1198	1109	1187	2.91	4.25	4.11	3.78	3.94	4.31	3.55
							YOR104W	610	797	860	1246	1002	481	1174	781	1.93	1.78	1.88	2.14	2.03	2.41	2.51
							YMR217W	160	104				229			7.72	4.25	1.31	0.77	1.16	4.95	6.86
							YPL043W		30				5			2	0.42	0.36	0.32	0.5	0.94	1.16
							YGR193C	48				122			35	1.45	2.17	2.28	1.97	1.95	1.49	1.65
							YPL004C		73	207		56				5.81	24.06	30.24	31.31	25.43	10.05	7.3
							YLR180W	409		280	116	445	1159	445	2013	6.3	7.65	4.78	3.77	4.04	6.8	6.04
							YNR019W		38			17				1.18	1.78	1.71	2.56	2.01	2.26	1.53
							YBR078W		55				111			25.39	28.76	24.35	27.4	31.04	41.24	43.29
							YLR163C		56		9	33		73	116	1.01	1.43	1.6	1.65	1.65	1.1	1.15
							YJL016W	105	138	58		28	136			1.2	1.73	1.76	2	2.06
							YDR044W	23	317			568	368	47	284	1.31	1.18	0.86	0.8	0.84	0.99	0.89
							YBR127C	542	429	367	544	725	806	973	2142	8.56	10.04	9.18	8.74	10.99	11.07	9.18
							YGR124W	3673	4844	4513	6240	6364	4852	6795	6986	8.22	9.12	9.12	8.05	10.2	11.63	10.05
							YML080W	106				74	37	105		1.19	0.45	0.37	0.43	0.55	0.78	0.94
							YDR444W	46			23	60	14			0.15	0.11	0.09	0.1	0.1	0.1	0.15
							YGL252C		52	52		137		61		1.65	1.95	2.16	2.06	2.06	1.58	1.88
							YGR279C	1594	1636	2278	2012	2188	1679	2564	2285	12.81	13.35	11	12.2	11.39	11.39	17.26
							YDL188C	163	135		188	377	128	307	90	1.38	2.06	1.85	1.81	1.85	1.5	1.32
							YDL065C		36			7				1.72	1.65	1.76	1.49	1.7	1.56	1.55
							YMR295C	237	448	159	136	312	1101	277	742	5.54	7.02	5.86	5.51	6.64	10.34	9.01
							YNR015W	156		95	106				67	1.24	0.77	0.57	0.69	0.73	1.05	1.18
							YNL007C	2359	2198	3131	4062	2621	2805	3001	2489	4.33	23.81	16.26	10.15	9.02	10.29	13.77
							YBR162C	179	191	202	409	201	409	232		13.71	11.21	9.63	10.17	11.77	16.19	17.71
							YOL068C		110				59			1.64	1.51	1.73	1.49	1.74	1.64	1.54
							YGR276C		9				8			1.24	1.31	1.31	1.27	1.35	1.57	1.47
							YMR044W	121	112	85	294		125	127		1.15	0.95	1.04	0.96	1.08	0.89	1.23
							YGR019W			59		367	340	338	523	0.89	2.49	4.43	3.94	5.41	4.58	1.94
							YOR204W	29	29		17	63	158		295	3.13	2.29	2.09	3.28	2.68	5.44	3.04
							YNL061W			143	79	88		224	193	1.81	0.56	0.29	0.36	0.52	1.2	1.6
							YPL158C			56			27	36	30	1.12	0.81	1.07	1.02	0.88	0.74	0.84
							YBL045C		560	575	483	756	640			2.4	3.93	3.47	2.35	2.5	1.92	1.95
							YER003C	4483	3467	3697	4095	5016	4943	4248	5799	1.91	1.99	2.05	1.91	2.47	3.54	3.1
							YNR053C	44	11		51	27				4.06	0.9	0.53	0.81	0.97	2.43	2.43
							YKR063C		11	72	77			110		0.81	0.65	0.56	0.72	0.72	0.83	0.91
							YKL172W	125			78	69				3.2	0.74	0.45	0.54	0.77	1.57	2.38
							YJR121W	901	680	679	1212	2267	1386	2195	1891	7.41	11.79	11.31	8.87	7.67	5.69	5.31
							YLR134W	258	188	507	381	784	356	342	463	16.64	18.21	14.19	14.89	13.8	16.99	15.74
							YKL195W		48	107		67				3.09	4.79	5.81	6.06	11.63	3.84	3.63
							YBR196C	13877	11670	10729	11696	12492	10888	8169	9255	19.17	19.04	13.19	15.15	19.04	29.26	19.99
							YDR188W	94				139			222	4.83	5.25	5.91	7.69	6.6	9.2	7.17
							YDR432W	230		265	75				361	3.78	3.86	3.96	3.55	4.43	5.27	4.28
							YHR216W	65	28	181		30	22			1.37	1.02	0.58	0.45	0.61	1.24	1.18
							YOR155C	87		108	19				90	0.62	1.12	1.28	1.28	1.55	1.22	0.76
							YBR130C		19			19				0.94	1.16	1.07	0.99	0.96	0.71	0.49
							YER090W	158	122	124	121	131	157	256	304	1.67	1.8	1.42	1.28	1.5	1.55	1.89
							YBL020W	134	139	115	150	250	334	193	329	1.47	0.95	0.84	1	1.07	1.51	1.44
							YOR375C	3513	2607	3703	2756	3319	2532	2709	2860	6.73	7.27		8.01	6.73	3.98	4.03
							YML002W	159	175	212	232	264				0.51	0.51	0.57	0.65	0.66	0.62	0.69
							YDR312W	95		135		29				1.37	0.37	0.33	0.33	0.51	0.77	1.02
							YMR290C		42		58				125	1.4	0.52	0.25	0.27	0.38	1.12	1.18
							YLR304C	2280	2389	1897	2180	3794	2217	2712	2194	5.58	6.87	5.81	5.62	5.35	2.46	1.89
							YMR313C	32		72		222				1.37	1.46	1.53	1.29	1.41	1.36	1.36
							YNL104C		184		185	104	56	144	548	3.24	3.69	3.52	4.84	6.08	6.89	5.68
							YGL253W	7517	7682	6044	8552	9522	8631	7175	7855	13.59	24	19.22	13.31	8.14	6.66	7.49
							YDL226C	120	43	126	64	148	72	216	205	1.75	2.24	2.2	1.82	2.17	2.26	1.98
							YLR044C	60772	61731	56708	83899	79186	75167	90185	152956	138.72	162.69	125.89	120.76	109.59	127.65	125.89
							YGR041W	17	22			39				0.72	0.6	0.66	0.81	0.93	1.04	0.9
							YKR027W		80	129	267		102	149	267	0.79	0.52	0.6	0.56	0.68	0.7	0.91
							YOR123C		35	262	125	110	153	76	304	1.4	0.78	0.88	0.73	1.48	0.87	1.12
							YML094W	140		409	95		93	86	291	1.65	1.87	1.25	1.14	1.32	1.79	1.62
							YOR233W	9				10		104	29	0.86	0.41	0.44	0.4	0.5	0.58	0.91
							YGR086C	51	112	191	227	238	170	17		7.59	11.35	14.27	14.77	17.94	6.17	8.25
							YDL153C		24	103		31	28	6		3.84	1.07	0.5	0.5	0.77	1.77	2.5
							YLR336C	12			131		25		17	1.29	0.39	0.37	0.36	0.52	0.7	1.06
							YDR113C	7		30		37			10	0.62	0.55	0.57	0.48	0.51	0.4	0.69
							YDR299W			35	31	197	46	53	124	1.51	0.36	0.2	0.26	0.45	0.68	1.09
							YDL229W	24473	24611	26221	33802	36809	22415	32037	34931	15.62	17.22	18.84	16.06	14.58	12.87	11.92
							YDR390C	470	693		778		381			1.01	0.78	0.86	0.73	0.97	0.88	1
							YMR167W	621	586	680	751	567	496	405	461	0.57	0.46	0.41	0.46	0.5	0.45	0.58
							YBR135W	521	327		274	394	551	268	565	1.21	0.97	0.94	0.9	1.19	1.27	1.33
							YAR014C		32	63	54		23		95	0.95	1.22	1.81	0.64	0.86	0.74	1.01
							YLL008W			10			38			3.85	0.77	0.31	0.39	0.81	2.27	3.12
							YPL093W	189	130	139	194	142	114	137	123	3.66	0.77	1.02	1.26	1.37	2.91	1.95
							YPL181W	22		30	37	36				0.77	0.74	0.64	0.65	0.63	0.71	0.65
							YOL019W	50	23		37	116				1.09	0.77	0.9	1.06	1.56	1.81	2.11
							YKL029C	425	247	300	225	448	335	214	262	2.77	0.58	0.44	1.33	0.72	1.95	2.59
							YDR129C	176	206	287	133	183	94	123	81	4.02	5.69	8.21	8.27	8.44	5.65	4.55
							YBL099W	444	382	687	1009	1151	1057	1333	1438	4.07	6.98	6.29	5.04	4.84	3.62	3.74
							YJL080C		13	33	29	7		25	38	3.36	2.25	1.85	1.92	2.22	2.49	2.58
							YKR048C	158	183	283	115	235	228	122	182	2.66	2.87	2.61	3.12	3.23	3.49	3.3
							YAL031C			56			233	97		0.97	1.22	1.29	1.07	1.14	0.86	1.04
							YLR369W			159	156	107		256	148	0.68	0.79	1	1.05	1.12	0.89	0.84
							YCR011C	15		14				56	58	1.15	1.29	2.18	2.43	2.45	1.65	1.76
							YJL041W	29	72			112	32	69	106	1.26	1.06	0.84	0.9	1.11	1.18	1.2
							YPR154W	349	231	803	195	568	390	380	345	0.94	1.39	1.4	1.28	1.43	1.83	1.53
							YAL053W	355	327	586	481	347		378	367	2.04	1.75	1.91	2.37	2.29	3.93	1.93
							YLR427W	77	59		56			16		1.85	1.59	1.98	1.9	2.39	2.73	2.55
							YHR047C		113	39	119	450	179	191	302	1.25	1.07	0.97	0.8	0.72	0.59	0.89
							YBR295W	83	55	132	147	35			44	0.59	0.41	0.47	0.59	0.55	0.73
							YNL085W	90	54		62	99	83	124	132	2.76	1.94	2.15	2.02	2.44	2.24	2.69
							YAL011W		58			28				0.81	0.69	0.67	0.76	0.74	0.72	0.69
							YOR206W			18	102	84		32	58	2.7	0.7	0.38	0.4	0.75	1.51	2
							YNL127W	6		4	36		18			0.57	0.49	0.59	0.56	0.57	0.44	0.51
							YER070W	17		13	7		55			2.07	0.95	0.73	0.75	1.24	1.14	1.45
							YAR007C			385		323			400	1.37	1.79	2.01	1.9	2.06	1.66	1.42
							YNL023C	4		36				14		0.78	0.32	0.36	0.45	0.47	0.78	0.88
							YGL234W	86	11				109	48	61	3.22	1.38	0.68	0.8	1.13	1.68	2.32
							YPR162C		28	75		73	28			0.64	0.58	0.52	0.53	0.67	0.55	0.68
							YMR302C		69	32		39				1.23	2	3.49	2.83	2.95	2.43	1.86
							YJR109C	163	94	91	123	145	120	94	136	1.33	0.59	0.62	0.69	0.91	1.14	1.27
							YCR057C	6			53	18			21	1.06	0.2	0.19	0.19	0.25	0.66	0.7
							YDL073W		14	14		13				1.26	0.79	0.89	0.83	0.96	0.87	0.98
							YMR189W	187	17	172	130	88	25	47	139	1.37	0.89	1.11	1.37	1.52	1.3	1.26
							YML034W			25	5			38		0.52	0.46	0.57	0.56	0.49	0.39	0.46
							YGL093W		57			44				0.73	0.84	1.16	0.97	1.16	0.75	0.79
							YLR410W			17	20		28	27		0.98	0.65	0.71	0.74	0.92	0.74	0.82
							YPR175W			68		33			31	0.7	0.78	0.54	0.59	0.63	0.7	0.83
							YER157W		42	28			38		126	0.71	0.62	0.68	0.73	0.8	0.79	0.94
							YDR379W	61	31		81		71	22		1.04	1.12	1.07	1.31	1.52	0.91	1.19
							YPR181C		54			49	27		193	2.17	2.29	2.19	2.94	2.64	2.67	2.44
							YNL247W	377	438	237	550	834	423	676	876	2.51	1.83	1.4	1.23	1.53	2.27	2.84
							YLR389C	41			25	85	78	69	123	1.09	0.83	0.94	0.92	1.04	1	0.92
							YOR198C	1260	956	860	1402	1317	1525	1304	1564	5.7	5.17	6.19	5.98	7.32	8.64	8.17
							YJL165C	14	15				6		41	1.42	1.34	1.64	1.48	1.43	2	1.42
							YMR031C		26			63	15			1.53	2.35	3.56	3.56	3.61	1.39	1.54
							YIL031W	18				74		79	58	1.13	0.97	1.06	0.96	1.06	0.89	1.08
							YFR040W	12				20		10		0.87	0.74	0.78	0.77	0.84	0.95	0.78
							YPL180W	37	31		73	31			48	1.08	1.19	1.05	1.05	0.94	0.82	0.96
							YPR088C			48			51	47	47	2.07	1.8	1.59	2.06	1.88	2.16	2.11
							YAL043C		22	42			25	25		1.08	0.79	1.09	1.05	1.1	0.91	0.82
							YDL102W		25		19		15			0.95	1.03	0.93	0.91	0.99	0.89	0.86
							YHR119W			23			4			0.8	0.54	0.57	0.49	0.59	0.44	0.69
							YPR184W			7	15	8	15		14	0.62	1.41	3.98	3.93	1.99	0.81	0.64
							YJL176C			4	9			10		0.56	0.39	0.41	0.38	0.47	0.38	0.64
							YDR017C	52	15	16	35	103	23	74	21	1.48	1.2	1.28	1.31	1.17	0.97	1.06
							YNL106C			72		57	32			0.56	0.55	0.56	0.59	0.57	0.51	0.5
							YDR069C	75	78	85	173	99	83	8		1.08	1.35	1.72	1.7	1.82	1.59	1.49
							YBR115C	10		65	6	6		12	27	1.53	0.69	0.68	0.75	0.9	1.02	1.14
							YNL257C	30		25		26	12			1.08	1	1.17	1.24	1.29	0.89	1.12
							YPR115W			19	17		23	20		1.68	2.13	2.01	1.93	1.67	1.45	1.4
							YLR357W		68	57		43				1.11	0.84	0.9	0.88	1.07	0.79	1.12
							YJL095W	58				82	39			0.62	0.49	0.57	0.6	0.59	0.59	0.53
							YPL022W	37			36	4		48		0.91	0.82	0.96	0.89	0.96	0.72	0.82
							YDR430C	11		64	64			44		1.3	3.89		1.94	0.65	0.26	5.2
							YMR019W	35			30		226			0.66	0.4	0.54	0.62	0.5	0.47	0.42
							YDR074W	64		313		147	29	153		2.28	12.2	23.74	15.02	12.99	3.97	4
							YIL125W	148	104	222	140	163	99	146	239	1.05	1.61	1.19	1.56	1.58	1.01	1.11
							YPL174C	22				49		35		0.58	0.48	0.6	0.46	0.35	0.41	0.38
							YDR097C			71	90	78		167	91	0.92	0.49	0.46	0.37	0.45	0.52	0.74
							YMR128W	22		18		58				1.69	0.36	0.44	0.38	0.43	0.79	1.02
							YMR012W	2				23	15			1.69	1.43	1.72	1.43	1.75	1.48	1.15
							YIL151C	44				39			22	0.95	0.78	0.76	0.88	0.71	0.71	0.72
							YGR140W			21	88	22	34		16	1.04		1.06	0.99	0.67	0.97	0.86
							YCL014W	26	24		48	64	7			0.54	0.29	0.27	0.28	0.37	0.24	0.54
							YPL009C	9	77	11	22		78	76		2.29	1.7	2.49	1.96	2.05	2.38	2.24
							YOR291W			15	33	13	17			1.26	1.01	1.2	1.23	1.26	0.93	0.88
							YDL112W		6				9			1.75	1.41	1.45	1.18	1.48	1.03	1.28
							YBR218C	606	235	314	412	717	427	102	682	2.02	1.57	1.86	1.95	2.18	1.64	1.65
							YER176W	6	13	72	106	31	56		53	1.35	0.73		0.78	1.02	0.86	1.02
							YCR073C			44			11			0.77	0.58	0.49	0.66	0.67	0.8	0.72
							YDR093W		15		48		8			1.29	1.31	1.11	0.96	0.99	0.99	1.01
							YOR336W		11		11	18		4		2.16	1.84	2.02	1.84	2.57	2.12	2.02
							YKR086W			23		12	42		35	0.67	0.75	0.78	0.85	0.74	0.72	0.75
							YER164W			11		14		17		1.69	0.98	0.96	0.83		0.85	1.28
							YER166W		7	43		77	13		22	1.21	0.88	0.95	0.92	1.18	0.95	1.03
							YML072C	32	76			89	121			2.72	2.42	3.12	2.66	2.43	1.3	1.82
							YOR124C			46			28			2.23	2.79	3.92	3.18	4.08	2.04	2.5
							YAL002W	91	44				13	61	10	0.6	0.66	0.68	0.66	0.68	0.63	0.62
							YLR071C	32				39		48		1.07	0.8	0.86	0.89	0.97	0.78	0.9
							YER093C			206			185			1.08	1.18	1.12	1.17	1.13	0.97	1.03
							YLR247C	14			20				10	0.8	0.71	1.13	1	1.01	0.77	0.72
							YBL066C	32	67			4	71			0.87	1.04	1.21	0.68	0.97	0.9	0.74
							YDL195W	56	99	50	18	163	66	77	233	2.1	1.45	1.64	2.21	2.09	1.96
							YKL014C		64	31				36		1.21	0.6	0.78	0.53	0.72	0.66	0.92
							YBR081C		22	16	35	38	32	60	26	1.01	1	0.99	0.93	1.04	0.85	0.86
							YIL159W			3		66	38	70	27	0.62	0.32	0.44	0.34	0.39	0.39	0.5
							YMR273C	22		5		39				0.92	0.88	0.99	0.97	0.98	0.86	0.84
							YLL048C	13	15	42	15	31				3.92	2.4	2.57	2.59	3.21	3.06	3.56
							YPR010C	82	44	9	104	66	51	181	141	3.36	1.22	0.9	0.76	1.01	2.12	2.31
							YOR304W		6			14	4	6		0.92	0.7	0.79	0.71	0.77	0.75	0.79
							YBL079W	34	9	48	11	24	11	48		1.43	0.9	1.02	0.79	1.03	0.87	1.18
							YJR033C	20	25	26	66	55				0.79	0.73	0.88	0.9	1.05	0.69	0.85
							YCR084C	154	149	235	152	222	132	202	226	1.64	1.23	1.17	1.38	1.45	1.24	1.71
							YPL167C	7	21	19	28	40	14			0.99	0.83	1.02	0.87	0.71	0.9	0.68
							YGL122C	160	193	205	182	299	112	211	267	2.05	2.31	2.42	2.23	2.49	2.47	1.91
							YFL008W	51	52	93	87		38	47	35	0.72	0.4	0.45	0.39	0.46	0.31	0.5
							YLL021W		11			14				0.97	0.57	0.46	0.39	0.52	0.44
							YER132C	154	184	99	256	276	203			0.74	0.43	0.43	0.52	0.59	0.63	0.61
							YMR259C			28	29	38	62	60		1.05	0.39	0.4	0.38	0.47	0.6	0.86
							YDL140C	13	87		25	109	105	99	166	2.64		3.12		2.64
							YLR305C	17	8				26	16	19	1.04	0.89	0.83	0.72	0.8	0.77	0.7
							YDR293C		12	21	4		31	9		0.97	1.08	1.22	1.28	1.51	1.45	1.12
							YLR383W			18		10			21	0.8	0.47	0.49	0.36	0.49	0.44	0.77
							YOR188W			34			39	40		1.19	0.74	0.72	0.68	0.8	0.86	1.19
							YJR140C		5	17			10			0.66	0.38	0.56	0.49	0.48	0.5	0.64
							YKL182W	243	386	150	492	1227	713	1198	1335	6.28	4.2	5.21	2.95	4.66	6.07	7.42
							YDR334W			13			17			0.85	0.94	1.18	1.01	0.98	0.61	0.75
							YFL007W		29		46	41	24		11	0.89	0.76	0.99	1.14	1.14	0.9	0.76
							YNL250W	6				17		15		0.75	0.68	0.83	0.75	0.88		0.78
							YLR342W	11	18			19				6.79	4.01	4.36	4.61	5.79	7.7
							YNR016C			25	15		18			4.87	5.12	5.76	4.18	4.48	4.27	2.49
							YGR032W			22			16			1.2	0.93	0.95	1.24	1.54	2.18	2.02
							YHR165C	32	40		2			41	47	1.47	1.21	1.21	1.3	1.36	1.36	1.2
							YBR140C	10	27			26		24		1.82	2.43	2.25	2.1	2.2	1.89	1.68
							YDR150W		6	28	22	8			14	1.03	1.09	1.05	0.77	0.9	0.63	0.73
							YIL129C	32	45	56	46		3		22	1.92	1.69	1.23	1.46	1.29	1.34	1.77
							YLR430W	23	50		37	23	11			0.89	0.63	0.72	0.52	0.74	0.63	0.66
							YBL004W			15	17	8			7	2.17	1.34	1.13	1.93	1.22	1.89	1.59
							YDR170C	17		19		17	13	29		1.79	1.88	2.01	1.78	1.75	1.51	1.58
							YNL262W	16	11	12	49	33	11	42	12	2.24	1.88	1.7	1.54	1.83	1.7	2.02
							YPL082C		14				9	29		1.14	0.83	1.03	0.87	0.75	0.99	0.74
							YCL019W		20		6				32	4.35	3.53	3.25	3.53	6.2	8.01	8.82
							YLR087C	4		24	27	14		28	16	1.74	1.26	1.42	1.81	1.54	1.58	1.38
							YOR191W	6	10			39				0.83	0.59	0.55	0.57	0.63	0.59
							YLR454W	9	19	21	43	18	16			1.1	1.13	1.1	1.05	1.16	0.81	0.92
							YOR326W			77	30			118	97	2.15	1.63	1.76	1.44	1.57	1.24	1.9
							YDR457W	4				11	10	7		1.31	1.17	1.28	0.97	1.2	1.23	0.8
							YIL149C	11		27		29		2		1.85	1.13	1.26	0.82	1.02	0.85
							YOR290C		17		21	53	11		7	0.83	0.75	0.83	0.69	0.74	0.54	0.81
							YKL203C		13			15	20	34		1.01	0.88	1.1	0.89	1.14	0.9	0.75
							YKR095W	25	22	16	26	34	30	66	65	1.37	0.99	1.16	1.05	0.88	0.72	1.04
							YLL040C	6	9		25	12	14			1.55	1.65	1.75	1.71	1.71	1.6	1.39
							YCR093W	16		45	11	33			11	1.15	1.22	1.29	1.19	1.06	0.96	0.92
							YIR006C	74	138	223	139	192	148	44	89	1.47	1.16	1.3	1.3	1.31	1.16	1.29
							YHR099W	63	72	90	128	66	72	64	75	2.01	1.89	2.25	2.1	1.94	1.47	1.77
							YKR054C	14	11	10	26	17		19	13	2.03	2.16	2.25	2.13	1.84	1.74	1.79
							YLR106C	15	20	25	26	36	5	35	17	1.24	1.16	1.38	1.44	1.39	1.48	1.01
							YPL242C				3					1.26	1.5	1.77	1.49	1.39	0.94	1.26
							YLR070C					49				0.93	0.97	1.27	1.69	1.37	1.04	0.98
							YPL266W			32						1.6	0.93	0.42	0.46	0.48	1.17	1.51
							YML097C					70				1.27	0.97	0.96	0.94	1.07	1.21	1.44
							YGL166W					53				0.8	0.99	0.91	1.1	0.86	1.67	1.29
							YDR477W					8				1.07	1.26	1.49	1.42	1.56	0.78	1.07
							YLR114C				54					1.24	0.88	0.98	1.05	1.09	0.99	1.3
							YEL025C					5				1.22	0.85	1.2	1.09	1.11	0.99	0.9
							YBR007C					77				0.71	0.57	0.61	0.61	0.73	0.79	0.87
							YLL019C			29						0.57	0.59	0.8	0.87	0.88	0.69	0.75
							YNL201C					32				0.86	0.52	0.56	0.55	0.63	0.85	0.83
							YML017W		60							1.13	0.65	1.16	0.73	0.94	1.04
							YBL086C				95					0.33	0.43	0.49	0.44	0.34	0.2	0.24
							YGL035C				43					1.06	1.33	1.67	1.45	1.45	0.79	0.75
							YAL054C						24			0.65	0.78	0.77	1.16	0.85	0.67	0.6
							YPR002W						75			0.47	0.48	0.57	0.85	0.79	0.44	0.42
							YNL172W		7							1.02	0.74	0.76	0.89	1	0.82	0.93
							YJL057C				22					0.66	1.8	1.8	2.24	2.04	1.22	1.11
							YHR034C						29			0.51	0.54	0.52	0.64	0.54	0.54	0.46
							YGL008C						80			21.63	12.95	9.75	8.66	10.37	18.83	21.63
							YGR257C					10				1.34	1.86	1.97	1.93	1.73	1.91	1.39
							YPL222W						64			0.5	0.7	0.73	0.79	0.74	0.74	0.46
							YNR030W			66						1.73	2.3	2.16	2.47	2.47	2.29	2.49
							YHR158C						8			0.87	0.8	0.52	0.79	0.86	0.63	0.87
							YDR369C			38						0.26	0.28	0.35	0.33	0.36	0.29	0.31
							YDR141C						5			1.07	0.96	0.91	0.9	0.85	0.82
							YPL072W		28							0.47	0.63	0.61	0.62	0.57	0.43	0.47
							YDL035C		49							1.12	1.26	1.35	1.26	1.17	1.92	0.8
							YPL064C					31				1.14	1.36	1.29	1.25	1.18	1.23	1.44
							YBL106C				30					0.52	0.3	0.4	0.44	0.49	0.41	0.47
							YEL032W			7						1.91	1.64	1.44	1.54	1.77	1.3	1.21
							YKL020C					44				0.66	0.48	0.6	0.6	0.6	0.53	0.54
							YBR235W						35			0.61	0.52	0.6	0.65	0.68	0.61	0.73
							YDR062W					29				3.43	2.67	2.55	2.36	2.88	2.85
							YLR064W		53							1.88	3.01	2.55	2.31	2.31	2.23	2.23
							YKL066W			673						3.49	4.48	4.97	2.77	5	4.01	2.95
							YDR311W					7				0.76	0.63	0.62	0.63	0.7	0.59	0.64
							YBR212W				80	352	89	233	98	0.84	1.08	1.32	1.37	1.44	1.06	0.96
							YIR007W				65	20			26	0.44	0.47	0.67	0.8	0.81	0.58	0.63
							YML129C	180				274				1.27	2.35	2.8	2.56	1.7	1.61	1.21
							YBR084W				59	3	37			4.11	2.01	1.28	0.95	1.32	2.89	4.03
							YDR128W	72					4			0.81	0.62	0.67	0.65	0.74	0.63	0.84
							YOL138C	6	16	22						0.9	0.95	0.89	0.95	0.9	0.7	0.93
							YBR275C					17	12	9	30	0.67	0.47	0.63	0.58	0.52	0.62	0.61
							YJR096W					138	100	106	231	1.12	3.29	7.36	8.39	9.25	6.63	2.71
							YKL128C	182			19					1.67	1.93	1.63	1.67	1.76	2.56	1.81
							YNL212W	15							52	1.4	2.27	2.46	2.19	2.6	1.85	1.95
							YNL186W	38				80				2.69	1.05	0.81	0.97	1.5	2.1	2.19
							YHR009C					56		30		1.15	1.31	1.19	1.25	1.34	1.56	1.1
							YOR109W				70		5			1.39	1.08	1.24	1.3	1.64	1.17	1.21
							YJL005W	11				21				1.1	1.39	1.49	1.46	1.38	0.92	1.07
							YAL029C				25	36		13	13	1.53	1.52	1.44	1.27	1.3	1.29	1.38
							YGL173C				52		81	131	152	3.82	3	3.4	3.85	4.24	3.67	3.54
							YKR056W			153	28					1.42	0.38	0.23	0.36	0.5	0.88	1.18
							YOL009C			90	142					0.85	1.16	1.21	1.05	1.17	0.99	1.17
							YDL132W		10					24		1.15	1.44	2.13	1.86	2.25	1.49	1.47
							YMR086W				16	86			20	0.8	1.01	1.3	1.18	1.47	0.84	1.05
							YPR186C		63						50	0.79	0.51	0.51	0.51	0.53	0.49	0.7
							YMR109W				36	24				0.83	0.66	0.73	0.65	0.81	0.56	0.71
							YGR099W		21					39	17	0.51	0.45	0.43	0.33	0.46	0.36	0.57
							YOR386W			89	36				29	0.59	1.05	1.23	1.72	1	0.85
							YKL080W	48					122		27	5.35	5.46	4.5	4.56	5.24	6.49	5.93
							YEL043W			11	36	24				1.33	0.89	1.02	1.08	1.13	0.99	0.87
							YIL092W		17					39	76	0.59	0.37	0.35	0.32	0.35	0.36	0.52
							YMR170C					40		19	145	0.46	0.76	1.75	4.17	4	1.55	0.88
							YKL197C			29	5	30				0.74	0.66	0.71	0.82	0.91	0.77	0.75
							YOL059W		32		138					2.49	1.64		1.75	2.12	3.96	2.12
							YNL163C	25				92				1	0.5	0.43	0.51	0.6	0.71	0.91
							YOL111C			156					191	1.46	1.93	1.71	1.52	1.52	1.61	1.74
							YFR016C				11	73	47		27	0.63	0.56	0.7	0.6	0.81	0.42
							YPL048W	7							111	4.39	5.08	5.26	4.97	5.63	5.22	4.74
							YGR008C					1701	1214	1939	1934	8.26	54.4	55.16	75.35	48.02	40.38	21.05
							YGL156W	37	29	12	29					0.57	0.47	0.8	1.74	1.99	1.63	1.47
							YML103C			15				27		1.32	0.85	0.87	0.91	0.96	0.99	0.89
							YLR129W				22	19				2.16			0.95	0.65		1.56
							YJL123C			29	9					2.23	1.85	1.99	1.92	2.3	1.72	2.1
							YOR165W			8	24					1.92	1.28	1.46	1.44	1.67	1.74	1.97
							YBR079C	11							4	3.04	1.43	1.37	1.19	1.52	2.01	2.17
							YMR020W						24	60		2.49	3.26	4.19	5.02	3.88	8.79	4.52
							YLR309C					64		105		1.26	0.86	0.9	0.83	1.05	0.69	1.06
							YER105C				49	13	69		35	0.95	0.63	0.69	0.74	0.84	0.74	0.91
							YGL163C		5						26	0.66	0.66	0.7	0.85	0.82	0.79	0.67
							YDL160C					76			132	1.15	0.85	1.1	1.13	1.25	1.24	1.17
							YOL056W	184	35	92						1.23	1.4	1.11	1.1	0.99	1.41	1.2
							YGL159W			122					21	0.87	0.91	0.79	0.8	0.84	0.84	0.79
							YHL021C					69	106	49	139	2.03	21.76	33.45	20.59	12.94	4.1	3.96
							YIL115C	4						23		3.36	2.36	2.09	2.16	2.57	2.19	2.4
							YEL055C	5						18		1.46	0.78	0.67	0.57	0.65	0.86	1.06
							YDR516C				21	61		70	130	3.57	31.66	32.78	17.32	9.74	4.48
							YOR273C		34					45		4.88	21.49	20.76	15.09	12.96	11.36	8.2
							YDR497C			64				43		4.65	4.37	5.65	8.44	9.24	6.14	6.81
							YGL164C		14					92		0.74	0.61	0.67	0.63	0.69	0.58	0.79
							YMR185W		22		12					0.9	0.27	0.17	0.3	0.38	0.72	0.97
							YJL042W	8					16			1.66	2.13	2.59	2.66	2.46	1.96	1.96
							YLL034C			14	39				45	1.41	0.5	0.47	0.45	0.53	0.83	1.07
							YLR310C				27			3		1.25	1.15	1.14	0.91	0.83	0.78	0.87
							YJR066W				16	13		14	12	0.78	0.78	1.34	1.1	1.89	1.03	0.95
							YBR279W	5				25				1.44	1.3	1.64	1.52	1.51	1.33	1.6
							YGR148C	195	80	584	211					53.06	69.04	40.21	23.91	20.67	28.04	37.26
							YMR305C						42		25	9.1	7.92	5.26	6.57	9.75	21.05	22.72
							YMR315W						69	400	1143	4.55	34.17	53.25	57.08	59.91	50.38	22.86
							YJL207C			13				3		2.16	2.55	2.18	1.8	1.61	1.8	1.55
							YGL133W			48		11				1.65	1.37	1.52	1.73	1.83	1.39	1.58
							YFR019W				23	59	24	21	25	0.65	0.86	0.83	0.65	0.54	0.54	0.62
							YKL135C				8	92				1.24	1.23	1.13	1.34	1.45	1.28	1.23
							YKL210W					39	108	271	303	3.06	3.42	5.29	6.51	6.56	6.56	5.01
							YDR495C						3		14	0.5	0.39	0.41	0.41	0.49	0.37	0.48
							YOR230W					42	98	199	371	10.2	19.84	19.56	15.03	14.22	16.22	13.27
							YER021W				74			25		2.86	4.11	5.27	4.78	5.53	5.38	3.75
							YPL040C	29			95					1.22	1.02	1.34	1.27	1.27	0.95	1.02
							YLR105C	58			64					0.87	0.85	0.73	0.77	0.86	1.11	1.04
							YMR258C	76				98				1.5	2.32	2.18	1.93	2.28	1.13	1.51
							YMR129W					92			9	1.07	0.62	0.6	0.61	0.65	0.73	0.85
							YJL112W	35						28		1.05	1.11	1.38	1.28	1.09	0.98	1.25
							YLR293C	196					187		117	10.67	12.96	9.29	7.81	9.1	13.51	9.96
							YLR175W					143	13		120	6.79	2.86	1.43	1.5	2.24	4.54	5.52
							YIL077C			80		204				1.07	2.06	2.84	2.26	1.73	1.96	1.27
							YNL102W				3			6	39	1.41	0.88	0.72	0.58	0.9	0.92	0.87
							YDR085C			20				18		1.24	3.02	5.29	6.52	5.56	3.57	1.48
							YBR073W			81	35					1.42	0.82	0.95	1.02	1.25	1.14	1.36
							YNL243W					54			131	1.64	1.65	1.75	2.4	1.65	1.45	1.9
							YBR199W				12	112				1.65	2.55	2.73	2.36	2	1.6	1.74
							YNR059W						12	111		0.74	0.78	0.75		0.8	1.08	0.98
							YDL223C							4	11	1.06	1.03	1.42	2.33	2.44	1.2	0.9
							YMR231W				36	10				0.7	0.65	0.66	0.62	0.66	0.57	0.64
							YBR126C					140	113	59	266	1.98	9.87	14.45	14.15	10.73	5.04
							YHR066W		86		30					1.87	0.49	0.35	0.47	0.69	1.12	1.55
							YER025W					13	51		317	4.46	3.26	2.09	1.91	2.54	4.16	4.16
							YNL321W	79				95				0.7	0.71	0.87	0.96	0.85	0.53	0.65
							YGL137W	9				47				2.17	1.8	1.97	2.23	2.6	2.33	2.88
							YDL240W					14			38	1.44	1.45	1.43	1.33	1.35	1.05	1.18
							YML010W		22	28					52	1.62	1.28	1.28	1.2	1.32	1.2	1.86
							YGL195W				16			8	2	2.29	1.34	1.46	1.15	1.55	1.61	1.8
							YMR229C					13		9		3.16	0.93	0.51	0.16	0.74	1.72	1.84
							YGL037C					616	466	1358	1976	6.67	62.61	86.13	72.43	58.83	27.83	13.44
							YBR002C					13			73	1.17	1.04	1.2	1.05	1.03	1.5	1.44
							YMR137C	143		13						0.41	0.34	0.41	0.4	0.38	0.36	0.44
							YGR159C				10	37				8.47	4.8	3.39	3.28	4.09	7.79	7.79
							YDL143W					54	27			4.21	4.83	5.47	4.87	5.87	6.88	4.7
							YFR015C				130	146		62		2.66	22.06	23	13.3	7.03	1.49	2.02
							YML091C				13				9	0.9	3.58		1.06		0.42
							YBR033W			6		20				1.28	0.92	0.88	1.02	1.09	1.04	1.11
							YJL109C			10		10				1.68	0.48	0.41	0.45	0.5	1.16	1.15
							YDR107C	76					18			0.77	0.73	0.72	0.71	0.83	0.63	0.74
							YGR163W				232		81	137		0.71	0.84	0.79	0.75	0.6	0.92	0.81
							YML131W				73	223	192	754	570	0.87	10.93	13.84	12.22	6.5	9.07	6.07
							YOR157C					28	57		77	2.92	6.38	7.18	7.28	7.85	6.89	4.74
							YPR008W			10					33	1.59	1.56	1.66	1.45	1.73	1.38	1.23
							YAL048C					130	82	190		0.69	0.67	0.72	0.68	0.65	0.76	0.76
							YMR112C	294	82	662						1.25	1.49	1.45	1.42	1.44	1.68	1.44
							YNL074C	19	12	323						0.66	0.78	0.99	0.92	0.88	0.74	0.71
							YKL209C	13			33					1.88	1.16	1.15	1.25	1.53	1.18	1.24
							YGR088W				64	88	25	79		0.3	2.85	6.16	7.13	6.25	1	0.51
							YNL112W				269	164	60		185	6.23	1.8	0.87	1.13	1.13	5.94	5.1
							YKL078W			25	69	6				0.83	0.1	0.18	0.14	0.15	0.42	0.56
							YNL220W					23	58	177	305	7.3	4.95	2.84	2.84	3.5	5.02	3.36
							YEL060C					87	56	83		1.66	5.38	8.74	10.4	12.45	9.5	5.13
							YGL026C	81							35	5.73	6.19	6.82	8.05	7.89	8.57	7.41
							YHR204W	20			134					0.61	0.38	0.27	0.32	0.37	0.37	0.48
							YLR422W						5	25		0.84	0.84	0.92	0.88	0.82	0.64	0.76
							YKR009C			60	35				31	1.21	1.48	1.79	2.31	1.47	2.04	1.44
							YPL127C				194				479	1.68	2.05	2.52	2.24	2.61	2.06	2.37
							YOL055C	121					42			1.34	1.3	1.61	1.57	2.12	2.55	2.66
							YOL130W					39		27	11	1.05	0.51	0.45	0.53	0.61	1.14	1.01
							YPL116W	35					7			0.7	0.8	1.08	0.85	0.78	0.31	0.78
							YBR067C						71	839		6.63	9.92	8.94	7.78	8.88	10.12	8.51
							YGR244C						40	152	115	1.35	3.63	5.81	7.16	7.06	4.66	3.58
							YBR049C	17						59		1.26	1	1.07	0.91	1.14	0.68	1.16
							YLR148W						32	80		0.7	0.58	0.74	0.72	0.74	0.57	0.72
							YLR382C		9					14		0.72	0.92	1.19	1.16	0.95	0.69	0.64
							YJR065C						56		262	2.88	4.14	4.92	4.52	4.99	3.97	3.2
							YDR249C			188	63					0.59	0.43	0.44	0.48	0.54	0.6	0.6
							YLR067C	2	10							0.92	0.66	0.68	0.69	0.79	0.66	0.78
							YNL054W				16	68			94	1.72	1.52	1.64	1.65	1.78	1.71	1.77
							YOR061W						42		203	3.37	3.39	3.17	3.06	3.49	3.54	2.59
							YHR164C	28		16						1.89	2.05	2.29	1.89	1.94	1.81	1.76
							YAL024C					27		8		1.09	1.2	1.4	1.24	1.05	0.69	1.02
							YOL021C			7					34	1.38	0.68	0.77	0.75	0.94	1.26	1.32
							YNL313C					49		29	68	1.31	0.43	0.28	0.34	0.49	0.76	1.05
							YEL031W				42		22			5.13	8.21	5.85	6.06	4.43	5.53	4.62
							YOL060C				235	40			41	1.13	1.6	1.65	1.65	1.68	1.16	1.41
							YER014W				51	15	70	29		1.21	1.37	1.6	2.06	2.1	1.96	1.53
							YCL050C					58	43		720	2.98	4.91	5.48	3.93	4.3	5.41	4.04
							YBR169C	19	21							0.78	2.06	4.19	3.8	4.27	4.04	2.4
							YLR189C				9	15				0.77	0.69	0.68	0.69	0.67	0.44	0.76
							YJL159W					165	131	251	555	7.51	9.18	10.47	15.98	16.77	20.65	7.94
							YOR320C	6			9					1.27	1.3	1.19	1.03	1.16	0.91	1.37
							YOL087C				27			53		1.07	1.81	1.85	1.53	1.84	1.12	1.05
							YNL084C					27			36	1.96	3.18	2.91	2.19	2.26	1.65	1.67
							YGL111W	33			71					1.22	0.58	0.34	0.4	0.51	0.89	1.01
							YKL215C						11		52	0.65	0.54	0.63	0.76	0.82	0.65	0.63
							YER022W		52						14	1.6	1.6	1.95	1.49	1.64	1.3	1.61
							YOR001W					30		16		1.51	0.56	0.42	0.42	0.57	1	1.13
							YCR033W		37		16					1.53	1.44	1.38	1.27	1.54	1.32	1.34
							YER172C					18		5		0.93	0.75	0.7	0.76	0.82	0.75	0.63
							YDR406W					15			17	0.76	1.27	1.21	1.64	1.03	0.79	0.69
							YHR023W		6					9		0.81	0.63	0.65	0.55	0.65	0.39	0.59
							YDR486C					186			450	1.03	1.52	1.76	1.63	1.54	1.62	1.13
							YLR330W			22	31	43				3.93	4.27	4.7	3.9	4.09	3.19	3.74
							YDR337W					55			76	1.09	1.66	1.97	1.71	1.56	1.01	0.89
							YNL273W						6		22	0.85	0.84	0.86	0.75	0.78	0.47	0.69
							YNR008W				44	25	13			0.57	0.5	0.68	0.7	0.67	0.53	0.59
							YDR217C			7	13				16	0.85		0.8	0.69			0.56
							YBR245C					20			12	1.22	1.02	1.32	1.15	1.21	0.9	1.13
							YGL158W	35				140				0.19	0.15	0.17	0.3	0.23	0.18	0.14
							YGL201C					16	41	29		0.79	0.66	0.77	0.79	0.77		0.62
							YGR282C					213	212		257	27.3	37.04	29.26	39.97	38.88	53.11	46.55
							YMR089C		10	35						1.84	2.3	3.23	3.41	4.29	2.95	2.43
							YIL002C				48			19		0.8	0.64	0.72	0.65	0.76	0.6	0.6
							YGR184C	10	37							4.23	5.2	4.28	6.82	7.46	3.97	2.39
							YNL197C			59		160				0.91	0.66	0.68	0.64	0.7	0.52	0.73
							YIL083C				338	110				1.31	0.98	0.79	0.81	1.13	1.86	1.61
							YER133W							66	249	4.98	5.68	6.94	5.33	6.13	5.72	5.76
							YNL271C					40	18	14		1.12	1.37	0.96	1.01	1.08	0.96	0.99
							YJL083W			18	60					0.22	0.15	0.17	0.19	0.22	0.21	0.23
							YML049C					18	55			0.91	0.96	1.11	0.89	0.9	0.71	0.71
							YNL087W				55	52	36	19		1.52	0.82	0.56	0.29	0.4	0.61	1
							YOR278W	106							135	1.16	1.49	1.46	1.47	1.24	1.39	1.32
							YJR060W					50	65		256	1.2	0.96	1.03	1.07	1.37	0.67	1.25
							YML081W				78	21			52	1.27	0.92	0.95	0.76	0.75	0.84
							YDL029W					93		89	267	3.73	5.98	7.31	6.15	7.42	6.41	5.14
							YGR234W				120		69	173	313	21.66	26.48	13.61	8.44	7.15	12.1	14.29
							YCR004C					380	680		491	3.83	9.76	13.25	13.81	17.97	12.62	7.61
							YKL193C							28	72	1.68	3.76	4.38	3.81	3.81	2.89	2.3
							YER120W				131			66		3.83	5.12	4.52	4.16	4.75	4.81	4.56
							YDR019C					140	113		61	2.37	1.85	2.15	2.56		2.42	2.9
							YHR113W			41	35					1.94	3.02	3.59	4.39	4.36	3.1	2.03
							YGL099W	60							39	1.28	0.5	0.4	0.38	0.52	0.8	1.09
							YOR368W					189	255		14	1.45	1.65	1.44	1.3	0.94	1.24	1.35
							YGR250C				21		40			0.79	1.66	1.5	1.07	1.2	2.16	1.1
							YKR084C			18				43		1.1	1.13	1.16	1.09	1.18	1.21	1.16
							YGL014W	58						100		1.36	0.68	0.71	0.72	0.85	0.91	1.11
							YDR098C					267	240	54		1.52	2.02	1.82	1.68	1.97	2.88	2.56
							YGR170W		23	57						0.73	0.47	0.64	0.6	0.77	0.54	0.75
							YKL211C							38	175	1.79	1.59	1.31	1.2	1.56	1.83	1.95
							YLR110C					23452			42811	34.5	65.28	56.05	58.43	46.48	43.67	39.91
							YGR070W					26	54			0.77	1.18	0.97	1.01	0.91	0.51	0.69
							YKL096W					636	646	537	377	6.05	26.5	42.45	66.15	64.79	22.75	21.23
							YKR006C						32		52	1.79	2.79	2.91	2.77	2.97	1.89	1.72
							YNR031C				55	23				1.22	1.51	1.21	1.3	1.75	1.34	1.48
							YJL200C							27	196	1.41	0.58	0.32	0.38	0.45	0.72	0.97
							YDL103C					63		124	147	1.19	1.68	1.68	1.93	1.59	1.42	1.45
							YNL059C	21				18				0.98	0.72	0.74	0.73	0.89	0.65	1.04
							YPL058C					61	23		23	1.59	1.89	1.86	1.95	1.47	1.67	0.92
							YJR126C	91		46	142					2.04	2.12	2.39	2.34	2	1.54	1.77
							YKL114C	20						21		2.87	3.17	3.32	3.32	2.87	4.8	4.67
							YNL327W					161		278	386	6.19	4.62	5.03	6.19	6.06	5.5	4.03
							YPR011C					156	40			0.68	0.89	0.84	0.87	0.73	0.68	0.65
							YPL176C						27	53		1.33	1.37	1.43	1.39	1.29	0.89	1.27
							YML016C	36		79	42					3.27	3.63	3.55	3.71	3.46	3.36	3.65
							YIL126W			99		35				1.45	1.41	1.52	1.05	1.33	1	1.03
							YOR033C					15			10	0.79	0.59	0.72	0.62	0.65	0.56	0.6
							YGR271W					25		12		0.68	0.51	0.63	0.66	0.6	0.51	0.58
							YBR145W					185	57		154	2.69	3.05	2.16	2.69	2.97	4.26	2.68
							YDR038C	49				34				2	1.44	1.7	1.84	1.98	2.11	2.11
							YGR272C					62	111	228	26	2.4	0.72	0.45	0.5	0.65	1.2	1.51
							YGL087C					970	292	414	972	1.3	2.53	2.83	2.55	2.83	2.73	1.78
							YBR072W					199		196		0.82	5.05	14.37	6.08	6.7	5.64	2.67
							YDL033C					58	38			0.79	1.01		0.81	0.96	1.04	0.64
							YDR480W					98			259	0.63	0.77	0.79	0.7	0.6	0.68	0.83
							YGR246C				266	353	150	326		1.51	1.15	1.27	1.08	1.18	1.18	1.44
							YHR043C						80		139	0.81	1.45	1.81	2.26	2.28	2.18	1.54
							YMR100W				44		21			0.95	1.27	1.4	1.26	1.2	1.33	0.96
							YBR058C					137	31	56	140	0.72	0.63	0.61	0.7	0.73	0.74	0.77
							YLR460C					387	245	194	306	0.63	4.42	4.54	3.61	3.9	4.15	5.91
							YHR186C				6		6	15		0.75	0.61	0.55	0.67	0.73	0.74	0.84
							YMR111C						16		34	0.61	0.52	0.64	0.66	0.71	0.51	0.72
							YFR049W			123				137		1.14	2.66	3.09	2.55	2.53	1.62	1.23
							YBR059C					20		15	7	0.86	0.88	1.05	1.07	1.07	0.65	0.88
							YKR071C							64	133	2.57	6.16	4.8	4.27	5.59	5.37	5.63
							YGL092W				10	12				1.3	1.19	1	1	1.09	0.89	1.09
							YHR070W						40		36	1.39	0.58	0.49	0.65	0.75	1.57	1.35
							YHR028C			33	52					1.39	1.74	2.35	2.65	2.58	1.76	1.65
							YGL206C	3							3	1.83	1.57	2.27	2.11	1.74	1.4	1.58
							YDR524C			67		147				0.71	0.41	0.39	0.46	0.5	0.61	0.62
							YPR022C					41	22			1.01	0.68	0.69	0.68	0.71	0.71	0.7
							YBL105C			17					29	0.73	0.62	0.62	0.65	0.65	0.56	0.59
							YER184C	65	23					78		0.54	0.49	0.5	0.58	0.71	0.76	0.84
							YOR227W				40	35		17	11	0.79	0.92	1.31	1.5	1.42	0.74	0.87
							YKL089W	21				14				0.6	0.46	0.48	0.49	0.53	0.36	0.62
							YHL008C		16						21	0.79	0.84	0.97	0.95	0.97	0.72	0.65
							YGR081C			125	85					1.62	1.04	0.74	0.79	0.89	1.05	1.41
							YOR052C							98	152	3.17	14.86	19.6	14.96	12.24	12.67	7.64
							YNL136W				32	63	107			0.83	0.53	0.49	0.53	0.71	0.61	0.74
							YBR261C						87		35	1.27	1.55	1.41	1.57	1.55	2.14	1.65
							YFR002W					211	43	273	31	0.9	0.75	0.81	0.74	0.81	0.56	0.76
							YPL207W					34		35		1.58	0.7	0.65	0.43	0.54	0.83	1.37
							YNL144C		25					23		0.65	1.14	0.88	0.68	0.44	0.46	0.48
							YKR050W			20					20	0.52	0.37	0.49	0.59	0.68	0.72	0.68
							YLR003C				19	38				1.99	0.78	0.44	0.44	0.64	1.11	1.4
							YKL148C					104		59	80	0.74	2.01	1.62	1.6	1.24	0.5	0.48
							YOR208W				131		115			0.85	0.93	1.11	1.21	1.44	2.29	1.3
							YOR382W					2201	1987			1.76	6.17	6.8	11.6	9.55	9.35	7.34
							YOR254C	40					40			4.09	3.76	3.63	3.68	4.56	4.99	5.17
							YNL131W					286	121	329	116	3.36	4.84	5.02	4.68	4.98	3.88	3.55
							YHR042W			10				15		5.18	3.51	2.7	3.51	3.79	5.59	5.75
							YIL110W						326		214	1.13	0.76	0.6	0.61	0.73	0.96	1.04
							YDL109C				117	28		45		0.78	1.12	0.54	0.88	0.55	0.49
							YJR039W			27				27		0.53	0.66	0.82	0.77	0.63	0.41	0.48
							YFL016C					137		119		1.71	6.18	7.98	3.91	5.68	3.52	4.05
							YNL103W					23	41			0.75	0.58	0.67	0.61	0.77	0.78	0.82
							YCL039W						31	49		0.95	1.11	1.11	1.15	1.02	0.92	0.81
							YOR239W					69		58		1.89	1.54	1.67	1.71	1.74	2.18	2.25
							YML071C	18	27							0.97	0.6		0.7	0.78	0.66	0.86
							YDR091C	168	108							2.34	1.05	0.65	0.68	0.94	1.47	1.59
							YNR065C	39	20	16	41	21		22	21	1.15						0.86
							YDR028C				51	30				1.32	1.57	1.58	1.3	1.41	1.01	1.17
							YCL051W				9			10		0.39	0.52	0.58	0.51	0.48	0.41	0.37
							YGL058W					1428	799			1.58	2.06	1.87	1.66	1.83	1.93	1.83
							YNL090W						126	83	72	1.11	1.27		1.04	1.28	1.26	1.44
							YBR293W							118	300	1.11	0.98	0.94	1.17	1.14	1.86	1.48
							YJL049W	12	20							0.65	0.64	0.66	0.68	0.67	0.51	0.6
							YER147C							114	62	0.47	0.34	0.42	0.58	0.48	0.59	0.52
							YPL236C					178	70		187	0.71	0.77	0.85	0.84	0.78	0.68	0.74
							YOR158W							64	72	1.19	2.07	2.66	2.16	2.12	1.22	1.16
							YNL310C				442	565	206			0.88	1.42	1.29	1.11	1.2	0.96	0.84
							YPL137C				41	42				0.94	0.74	0.84	0.98	1	1.34	1.04
							YGR199W	44	36							1.3	1.17	1.18	1.37	1.45	1.13	1.53
							YKL191W						39	109		1.8	0.68	0.34	0.47	0.72	1.47	1.83
							YOL097C							265	195	3.99	3.24	2.31	1.63	1.87	2.51	2.96
							YNL234W				116	243		271	338	0.77	0.48	0.57	0.83	1	2.47	1.15
							YOR092W				108				121	0.79	0.75	0.67	0.81	0.82	1.21	0.95
							YEL061C				28			41		1.54	1.31	1.02	0.71	1.14	2.12	1.11
							YGR171C					89	60			0.79	1.03	1.07	1.03	0.96	0.94	0.93
							YIL046W						39	21	33	0.8	0.7	0.72	1.03	0.86	0.96	0.78
							YKL032C	176	93							0.96	0.82	0.88	0.86	0.95	0.87	0.96
							YBL036C	123	87							1.74	1.94	1.83	1.73	1.88	2.14	1.94
							YFL013C							88	58	0.86	0.61	0.71	0.74	0.87	0.81	0.94
							YMR134W	316	426							1	1.07	0.87	0.87	0.81	0.87	0.92
							YDR251W	54		86						1.35	1.68	2.02	1.85	1.95	1.5	1.39
							YDR354W						159	134		0.98	1.48	1.49	1.3	1.38	0.77	0.95
							YMR211W							12	12	0.86	0.59	0.51	0.59	0.56	0.74	0.84
							YDR310C			31					32	0.87	0.84	0.99	0.82	0.96	0.68	0.83
							YDR359C					20		17		0.38	0.36	0.39	0.35	0.41	0.3	0.38
							YBL088C							8	8	1.7	1.74	1.33	1.27	1.6	1.41	1.26
							YPR031W							57	106	0.87	0.5	0.53	0.55	0.51	0.64	0.87
							YJR092W					6	5			0.86	0.55	0.62	0.57	0.67	0.38	0.7
							YIL137C							21	25	0.64	0.52	0.63	0.53	0.69	0.63
							YKR103W						15	9		0.41	0.29	0.38	0.35	0.29	0.27	0.29
							YGR097W		54		79					1.16	1.09	1.25	1.42	1.64	1.63	1.09
							YER129W				59			80		0.68	0.44	0.48	0.46	0.54	0.53	0.63
							YPL240C						120		96	7.35	24.21	34.01	23.88	25.07	19.13	23.39
							YPL193W							70	99	0.81	0.4	0.36	0.52	0.57	0.65	0.71
							YPL060W							90	151	1.06	1.12	1.31	1.31	0.76	1.17	1.3
							YEL029C	892	950							0.91	0.74	0.68	0.72	0.85	0.93	0.9
							YJL092W				37		43			1.33	0.99	1.05	1.05	1.13	1.09	1.62
							YLR265C					1817		1778		0.91	0.84	0.69	0.66	0.71	0.82	0.86
							YNL272C							74	56	1.16	1.05	1.05	0.95	1.11	0.77	1.17
							YJL062W							496	645	0.87	0.82	0.82	0.83	0.89	0.83	1.08
							YJL033W							14	22	1.21	0.34	0.3	0.58	0.38	0.7	0.86
							YOL065C					103		94		1.01	1.12		1.21	1.31	1.12	1.13
							YKL074C							106	155	0.88	0.49	0.59	0.63	0.84	1.49	1.28
							YDR022C							302	336	0.81	0.98	1.18	1.18	0.89	0.96	0.96
							YAR042W						33		33	0.59	0.36	0.47	0.53	0.55	0.52	0.53
							YHL004W							70	53	0.64	0.8	0.79	0.79	0.96	0.67	0.64
							YHR149C	121				77				0.3	0.13					0.13
							Q0050					98
							Q0105						327	383
							YAL001C									1.89	2.1	2.09	2.1	1.75	1.43	1.65
							YAL004W
							YAL007C									2.76	3.87	4.24	3.87	4.94	5.83	5.04
							YAL008W									1.67	3.36	4.19	3.91	4.16	3.67	2.67
							YAL009W									1.06	1.43	1.87	1.38	1.31	1.31	1.17
							YAL010C									1.12	1.27	1.51	1.32	1.51	1.3	1.31
							YAL013W									0.82	0.92	1.03	0.85	1.18	1.21	0.94
							YAL014C	13								0.97	1.37	1.59	1.45	1.71	2.28	1.3
							YAL015C									0.92	1.38	1.6	1.72	1.83	1.6	1.19
							YAL016W									3.12	4.23	5.07	4.54	4.86	4.6	3.82
							YAL017W									1.36	2.01	2.31	2.19	2.13	1.78	1.63
							YAL018C
							YAL019W						17			0.95	0.7	0.63	0.68	0.66	0.9	0.89
							YAL020C									0.65	0.68	0.7	0.76	0.51	0.68	0.63
							YAL021C									1.39	1.42	1.77	1.78	1.8	1.87	1.72
							YAL022C									0.91	0.98	1.06	1.07	1.2	1.05	0.93
							YAL023C									2.22	1.75	2.07	2	2.21	2.62	2.89
							YAL025C									1.62	0.42	0.31	0.29	0.47	1.02	1.04
							YAL026C					14				1.37	1.61	1.61	1.33	1.24	1.28	1.24
							YAL027W									0.92	1.05	1.16	0.99	1.01	1.01	0.9
							YAL028W									0.83	1.11	1.36	1.43	1.39	1.3	1.04
							YAL030W									1.69	2.51	2.63	2.29	2.42	2.05	1.79
							YAL032C									0.58	0.59	0.64	0.55	0.6	0.54	0.55
							YAL033W									1.69	1.98	1.79	1.5	1.58	1.49	1.69
							YAL034C									0.7	0.91	1.16	1.25	1	1.16	1.03
							YAL034W-A									1.41	1.52	1.47	1.25	1.42	1.37	1.34
							YAL035C-A
							YAL035W									5.37	3.15	3.4	2.74	3.85	4.01	3.93
							YAL036C									3.17	1.97	1.65	1.71	1.9	2.86	3.09
							YAL037W									1.1	0.83	0.86	0.9	0.93	1.1	1.03
							YAL039C									1.63	2.96	3.85	2.76	3.96	2.94	1.71
							YAL040C									1.35	1.46	1.59	1.64	1.53	0.99	1.01
							YAL041W									1.54	1.22	1.51	1.3	1.61	1.32	1.54
							YAL042W									3.21	3.89	3.56	3.71	3.63	3.53	3.23
							YAL043C-A
							YAL045C
							YAL046C									2.06	2.28	2.07	1.81	1.41	2.23	2.1
							YAL047C									1.67	1.21	1.34	1.22	1.4	1.37	1.47
							YAL049C								108	2.01	2.7	2.8	2.84	3.11	2.63	1.99
							YAL055W									0.87	1.07	1.15	1.14	1.14	0.93	0.93
							YAL056W									1.17	1.29	1.28	1.15	1.14	0.96	0.99
							YAL058C-A
							YAL058W									1.83	1.36	1.92	1.66	1.21	1.42	1.31
							YAL059W									2	0.92	0.74	0.5	0.98	0.94	1.24
							YAL060W									1.31	3.82	4.83	5.04	3.61	1.43	0.98
							YAL061W									0.5	1.93	3.06	1.85	1	0.84	0.5
							YAL062W									0.72	0.85	0.94	0.84	0.75	0.56	0.49
							YAL063C
							YAL064C-A
							YAL064W
							YAL064W-B
							YAL065C
							YAL066W
							YAL067C									0.67	0.76	0.68	0.68	0.6	0.61	0.63
							YAL068C									0.99	0.89	0.91	0.86	0.59	1.06	1.1
							YAL069W
							YAR002C-A									5.51	6.16	5.63	5.95	7.32	8.71	8.65
							YAR002W									1.21	1.16	0.96	0.95	1.09	1.06	1.06
							YAR003W	14								1.48	1.23		1.31
							YAR008W									2.4	2.68	2.29	1.69	2.57	2.21	2.09
							YAR009C									7.58	7.07	7.42	6.55	8.89	9.27	8.95
							YAR010C									5.15	4.54	3.61	4.57	5.71	8.13	5.75
							YAR018C									0.81	0.72	0.86	0.68	0.68	0.43	0.68
							YAR019C						14			0.7	0.72	1.31	0.49	0.57	0.62	0.53
							YAR020C
							YAR023C									0.36	0.4	0.38	0.4	0.32	0.46	0.34
							YAR027W									2.15	3.59	3.13	3.9	3.45	3.4	3.26
							YAR028W									0.52	0.46	0.44	0.45	0.46	0.6	0.52
							YAR029W
							YAR030C
							YAR031W									0.6	0.85	0.77	0.78	0.8	0.86	0.79
							YAR033W									0.54	0.66	0.61	0.62	0.72	0.86	0.75
							YAR035W									0.35	0.41	0.41	0.38	0.37	0.3	0.32
							YAR044W									0.73	0.56	0.7	0.71	0.75	0.66	0.59
							YAR047C
							YAR050W									0.98	0.87	0.88	1.02	0.86	0.69	0.81
							YAR060C									0.39	0.35	0.38	0.39	0.44	0.37	0.38
							YAR061W
							YAR062W
							YAR064W
							YAR066W									0.9
							YAR068W									0.45	0.46	0.49	0.52	0.63	0.68	0.67
							YAR069C									0.7	0.58	0.59	0.75	0.62	0.67	0.48
							YAR070C
							YAR075W									2.92	2.37	1.19	1.03	1.25	2.72	2.24
							YBL005W							103	44
							YBL005W-A
							YBL005W-B
							YBL006C									2.3	3.3	3.37	3.04	3.13	3.44	2.57
							YBL008W									0.76	0.64	0.9	0.76	0.79	0.71	0.71
							YBL008W-A	122
							YBL009W
							YBL010C									0.48	0.48	0.5	0.42	0.5	0.43	0.55
							YBL011W				15
							YBL012C
							YBL013W
							YBL014C									0.81	0.28	0.32	0.35	0.44	0.57	0.67
							YBL016W									1.01	0.62	0.54	0.89	0.91	1.57	1.39
							YBL017C									2.1	2.16	2.2	1.85	2.07	1.54	1.83
							YBL018C									2.04	1.51	1.18	1.22	1.18	1.85	2.41
							YBL019W									0.43	0.38	0.5	0.53	0.42	0.51	0.56
							YBL022C									1.81	2.32	3.64	3.87	4.41	2.7	2.18
							YBL023C									0.61	0.45	0.5	0.5	0.54	0.36	0.47
							YBL025W									0.76	0.81	0.91	0.98	0.71	0.89	0.72
							YBL026W									2.25	3.05	2.25	2.25	2.31	2.91	2.19
							YBL028C									2.36	1.04	0.52	0.61	0.85	1.53	1.81
							YBL029W				36					0.49	0.55	0.64	0.73	0.64	0.86	0.59
							YBL031W									0.52	0.51	0.51	0.54	0.39	0.39	0.52
							YBL032W									1.75	1.9	1.55	1.61	1.98	1.71	1.9
							YBL033C									1.35	2.85	2.85	2.49	3	2.72	1.96
							YBL034C									1.42	1.07	1.51	1.25	1.14	0.85	0.97
							YBL035C									0.7	0.44	0.4	0.43	0.57	0.45	0.61
							YBL037W									0.41	0.43	0.48	0.43	0.53	0.39	0.37
							YBL038W									1.72	2.8	3.35	2.84	2.94	2.4	1.98
							YBL039C									4.23	1.14	0.68	0.59	1.39	2.66	3.68
							YBL040C									3.04	4.71	4.25	4.55	5.23	4.81	4.27
							YBL042C									1.65	0.33	0.25	0.39	0.48	0.59	1.9
							YBL043W
							YBL044W
							YBL046W	15
							YBL048W									0.76	0.69	0.68	0.99	1.11	1.59	0.74
							YBL049W
							YBL051C									1.4	1.11	1.15	1.03	1.33	1	1.2
							YBL052C									0.94	0.6	0.55	0.45	0.54	0.43	0.73
							YBL053W
							YBL054W									1.21	0.16	0.62	0.13	0.24	1.03	0.9
							YBL055C	73	82
							YBL056W					59				1.61	2.01	2.37	2.27	2.49	2.02	1.68
							YBL057C	172								1.25	1.96	1.64	1.58	1.64	1.56	1.34
							YBL059W
							YBL060W									0.76	0.67	0.73	0.74	0.83	0.68	0.71
							YBL061C	86
							YBL062W
							YBL064C								141	2.06	22.39	25.72	22.71	21.63	10.82	5.45
							YBL065W
							YBL067C						67			1.61	1.38	1.4	1.19	1.42	1.16	1.37
							YBL068W			30						2.41	1.61	0.85	0.85	1.16	1.85	1.8
							YBL069W									0.81	0.49	0.43	0.41	0.44	0.93	0.71
							YBL070C
							YBL071C									1.09	0.63	0.79	0.81	0.9	0.93	1.08
							YBL073W									1.04	0.8	1.03	0.93	0.85	0.77	0.97
							YBL074C
							YBL077W									4.68	4.36	2.9	2.34	2.52	3.64	3.69
							YBL078C									0.86	3.02	3.26	3.69	3.74	2.16	1.31
							YBL080C									0.27	0.29	0.25	0.35	0.35	0.26	0.28
							YBL081W									0.98	0.67	0.58	0.67	0.74	0.7	0.73
							YBL082C									1.76	1.16	1	1.18	1.35	1.69	2.02
							YBL083C									0.94	0.7	0.54	0.67	0.7	1.09	0.99
							YBL084C									0.72	0.56	0.62	0.63	0.66	0.49	0.54
							YBL085W				5					1.65	1.66	1.94	1.49	1.33	1.02	1.12
							YBL089W									0.71	0.8	0.83	0.75	0.83	0.83	0.79
							YBL090W									1.22	2.25	2.36	2.11	1.84	1.43	1.14
							YBL093C									1.52	1.46	1.37	1.31	1.78	2.8	1.82
							YBL094C									1.06	1.14	0.94	0.89	0.96	1.12	0.98
							YBL095W									0.89	0.98	0.85	0.85	0.89	1.01	0.94
							YBL096C									1.12	1.01	0.9	1	0.96	1.01	0.93
							YBL097W
							YBL098W									0.73	0.75	0.71	0.6	0.69	0.77	0.98
							YBL100C
							YBL100W-B	34		33
							YBL101C									0.97	1.51	1.89	1.47	1.76	1.18	1.06
							YBL101W-A
							YBL101W-B
							YBL102W									2.24	2.98	3.31	3.64	4.07	2.74	2.74
							YBL103C									0.36	0.29	0.32	0.32	0.31	0.27	0.27
							YBL104C									0.89	0.63	0.79	0.79	0.85	0.87	0.93
							YBL107C									1.43	2.56	3.29	3.11	3.67	3.93	2.2
							YBL108W
							YBL109W
							YBL111C									0.49	0.45	0.47	0.5	0.5	0.39	0.45
							YBL112C									1.28	1.11	1.11	1.25	1.33	1.04	1.07
							YBL113C									2.96	2.9	3.38	3.28	3.35	2.58	2.78
							YBR001C									0.62	1.68	2.12	2.4	2.73	0.94	0.88
							YBR003W									0.4	0.09	0.46	0.2	0.11	0.2
							YBR004C									1.84	1.53	1.31	1.57	1.61	3	2.06
							YBR005W									3.53	5.03	4.35	5.43	5.9	17.51	8.28
							YBR006W				22	38	58		29
							YBR008C									1.63	7.7	6.52	4.1	5.45	6.57	4.21
							YBR010W					138				32.24	48.86	37.81	23.6	22.95	39.14	38.6
							YBR012C									0.79	0.66	0.66	0.72	0.67	1.16	0.78
							YBR012W-A
							YBR012W-B
							YBR013C									0.85	0.73	0.69	0.71	1.1	1.06	0.87
							YBR014C									1.74	2.5	3.58	3.25	3.46	2.83	2.58
							YBR015C									1.32	1.15	1.26	1.31	1.48	1.38	1.31
							YBR016W									2.49	3.89	4.65	4.08	4.31	4.11	3.65
							YBR017C									1.93	1.14	1.1	1.01	1.53	1.43	1.66
							YBR018C									0.37	0.38	0.42	0.56	0.17	0.35	0.31
							YBR019C
							YBR020W									0.55	0.47	0.45	0.43	0.28	0.35	0.44
							YBR021W									0.69	0.21	0.2	0.23	0.27	0.35
							YBR022W									1.16	1.48	1.41	1.41	1.09	1.41	1.27
							YBR023C									2.14	1.2	1.24	1.55	2.04	2.57	2.06
							YBR024W									0.99	1.48	1.75	1.61	1.02	1.6	1.05
							YBR027C									0.66	0.71	0.56	0.56	0.6	0.54	0.62
							YBR029C									1.89	1.68	1.85	2.27	2.53	1.78	2.1
							YBR030W									0.6	0.35	0.29	0.34	0.39	0.46	0.55
							YBR032W									0.6	0.46	0.38	0.42	0.34	0.42	0.34
							YBR036C									2.39	3.16	2.85	3.29	3.09	3.41	2.87
							YBR037C									0.87	2.43	3.34	2.93	3.16	1.41	1.05
							YBR038W						111			1.8	1.54	1.74	1.81	1.5	1.2	1.7
							YBR039W	50	151	781	464	342	231	498	383
							YBR040W									0.35	0.22	0.22	0.31	0.21	0.48	0.49
							YBR041W									2.35	2.54	2.52	2.7		2.21	1.86
							YBR042C						12			1.37	1.4	1.24	1.13	1.23	1.41	1.41
							YBR043C									0.9	0.52	0.58	0.69	0.95	1.18	1.38
							YBR044C									0.42	0.56	0.62	0.55	0.47	0.37	0.44
							YBR045C				117	67
							YBR046C									0.72	1.95	1.93	3.22	2.53	2.11	1.43
							YBR047W									0.54	1.74	0.9	1.44	1.26	1.01	0.49
							YBR050C									0.57	1.27	0.73	1.43	0.92	0.96	0.71
							YBR051W
							YBR052C									1.95	8.32	11.28	10.82	9.49	6.35	3.62
							YBR054W									2.66	4.17	3.3	2.35	2.16	6.15	1.71
							YBR055C									1.51	1.1	0.99	0.99	1.21	1.23	1.19
							YBR056W									2.53	7.2	10.39	11.85	9.3	6.09	3.88
							YBR057C									0.52	0.41	0.43	0.43	0.46	0.41	0.42
							YBR060C									0.51	0.4	0.36	0.36	0.41	0.36	0.44
							YBR061C									1.2	0.61	0.47	0.45	0.66	1.12	1.17
							YBR062C				313					2.15	5.29	5.44	5.52	5.15	5.04	3.1
							YBR063C									0.67	0.46	0.52	0.55	0.61	0.65	0.69
							YBR064W
							YBR065C									0.45	0.24	0.26	0.29	0.34	0.44	0.43
							YBR066C									1.22	1.34	1.68	1.31	1.59	1.11	1.85
							YBR068C									5	6.64	7.52	8.52	8.94	11.72	7.27
							YBR069C									3.07	1.32	0.8	0.89	1.11	2.08	2.33
							YBR070C									1.01	1.32	1.22	1.06	1.27	1.34	1.32
							YBR071W									0.91	1.11	1.01	1.16	1.72	2.16	1.44
							YBR074W									0.64	0.28	0.33		0.43	0.44	0.53
							YBR075W									1.13	0.82	0.69	0.69	0.81	0.81	0.92
							YBR076W									0.98	1.12	1	1.13	1.08	1.3	1.05
							YBR077C									1.37	2.3	2.12	2.01	2.14	2.05	1.66
							YBR080C									1.3	1.41	1.7	1.56	1.81	1.65	1.55
							YBR082C						459			11.17	32.27	39.73	29.08	32.49	36.81	25.49
							YBR083W									0.96	1.43	2.08	1.73	2.01	0.71	1.25
							YBR084C-A									18.48	26.13	15.75	10.18	9.63	13.81	14.6
							YBR085W									1.1	1.62	1.33	1.29	1.15	0.92	0.94
							YBR086C	58								2.37	1.91	2.2	1.94	1.96	1.32	1.67
							YBR087W									1.8	2.01	1.69	1.54	1.54	2.04	1.72
							YBR089C-A				187		286	229	349
							YBR089W									1.14	0.9	0.71	1.1	0.85	0.91	0.9
							YBR090C									2.57	6.28	7.17	7.17	7.95	5.47	3.71
							YBR091C									1.37	1.67	1.52	1.59	1.43	1.62	1.41
							YBR093C									0.89	0.37	0.19	0.2	0.31	0.57	0.35
							YBR094W									0.72	0.62	0.68	0.71	0.68	0.61	0.72
							YBR095C									0.85	0.7	0.69	0.58	0.83	0.8	0.98
							YBR096W									2.55	4.62	4.5	4.56	3.97	3.31	2.83
							YBR097W						4			1.42	1.39	1.74	1.55	1.36	1.38	1.09
							YBR098W
							YBR099C									0.74	1.2	0.84	0.66	0.61	0.71	0.91
							YBR100W									0.51	0.67	0.57	0.5	0.41	0.49	0.52
							YBR102C									0.44	0.35	0.36	0.39	0.39	0.35	0.42
							YBR103W									1.05	0.95	1.05	1.01	1.08	0.9	1.32
							YBR104W									0.94	0.51	0.34	0.49	0.52	0.94	0.84
							YBR105C									1.33	1.44	1.52	1.74	1.99	2.59	1.99
							YBR106W									10.52	16.62	15.73	15.84	18.44	20.61	16.39
							YBR107C									0.57	0.54	0.59	0.65	0.7	0.96	0.89
							YBR108W
							YBR109C			60						5.96	8.42	8.36	8.08	9.15	10.02	7.64
							YBR110W									0.79	0.9	0.81	0.85	0.99	0.9	0.9
							YBR111W-A					101
							YBR112C									1.74	1.69	1.74	1.48	1.88	1.34	1.52
							YBR113W									0.91		0.79	0.77	0.87	0.68	0.71
							YBR114W								7	0.54	0.6	0.64	0.7	0.53	0.81	0.51
							YBR116C
							YBR117C									0.35	0.34	0.35	0.57	0.65	0.35	0.31
							YBR119W									1.26	1.39	1.26	1.29	1.18	1.16	1.51
							YBR120C									1.61	2.79	3.02	2.74	1.48	1.5	1.33
							YBR122C									1.57	2.76	2.78	2.32	2.04	1.68	1.42
							YBR123C									0.77	0.78	0.77	0.79	0.8	0.64	0.77
							YBR124W
							YBR125C									0.84	0.92	0.84	0.84	0.97	0.88	0.82
							YBR128C									0.77	0.9	0.82	0.84	0.59	0.76	0.81
							YBR129C									0.98	1.49	1.46	1.38	1.45	1.26	1.15
							YBR131W									0.44	0.25	0.29	0.31	0.39	0.36	0.43
							YBR132C									0.55	1.27	1.41	1.36	1.06	0.69	0.23
							YBR133C									1.37	1.06	1.1	1.12	1.34	0.92	1.38
							YBR134W
							YBR137W									1.28	2.62	2.99	3.51	3.92	2.97	2.3
							YBR138C									0.37	0.42	0.38	0.5	0.46	0.21	0.4
							YBR139W	13				193	58	102	24
							YBR141C									0.65	0.39	0.31	0.45	0.49	0.68	0.66
							YBR142W									1.77	0.69	0.62	0.59	0.75	1.06	1.32
							YBR143C									9.46	7.27	4.73	4.18	5.21	7.96	7.85
							YBR144C
							YBR146W									1.55	2.3	2.5	2.55	2.29	1.67	1.21
							YBR147W
							YBR148W									0.65	0.6	0.57	0.74	0.6	0.59	0.62
							YBR150C									0.63	0.74	0.76	0.77	0.71	0.53	0.54
							YBR151W									2.05	3.28	3.44	3.74	3.59	3.02	2.4
							YBR152W
							YBR153W									0.91	0.81	0.68	0.68	0.8	1.11	0.89
							YBR154C							385		4.79	3.63	2.3	2.5	2.59	3.84	3.84
							YBR155W									1.26	0.46	0.46	0.48	0.62	1.06	1.18
							YBR156C									0.84	0.66	0.58	0.54	0.66	0.62	0.74
							YBR157C									0.71	0.92	0.78	0.88	0.96	0.71	0.86
							YBR158W									2.81	1.88	1.77	2.29	2.7	3.06	2.33
							YBR159W									4.56	5.17	4.44	4.28	4.66	4.96	4.75
							YBR160W									1.53	1.96	2.16	1.81	2.13	1.92	1.87
							YBR161W									0.61	0.62	0.72	0.59	0.61	0.59	0.61
							YBR162W-A
							YBR163W		5							0.89	0.68	0.61	0.61	0.73	0.87	0.89
							YBR164C									2.04	2.88	2.56	1.98	2	2.28	2
							YBR165W									1.21
							YBR166C									1.04	0.99	0.94	0.89	1.09	1.56	1.15
							YBR167C									0.84
							YBR168W									0.46	0.63	0.75	0.67	0.86	0.65	0.58
							YBR170C									0.84	1.57	2.27	1.99	2.4	1.9	1.32
							YBR171W									2.68	3.51	3.87	3.46	4.06	4.97	3.76
							YBR172C									1	0.58	0.47	0.55	0.68	0.75	0.78
							YBR173C									2.51	5.7	7.57	5.9	6.96	7.36	4.03
							YBR174C
							YBR175W									0.98	1.41	1.52	1.4	1.49	1.55	1.08
							YBR176W									0.61	0.81	0.76	0.68	0.82	0.81	0.88
							YBR177C									2.05	3.52	3.5	3.06	3.2	2.08	2.29
							YBR178W
							YBR179C						11			0.84	0.97	1.25	1.03	1.33	0.91	1.03
							YBR180W									0.35		0.29	0.33	0.35	0.38	0.15
							YBR182C
							YBR183W									1.58	5.59	5.91	6.69	3.02	3.79	1.72
							YBR184W
							YBR185C									2.17	3.95	4.29	4.17	3.25	2.71	2.48
							YBR186W
							YBR187W									3.99	3.19	2.11	1.83	2.2	2.7	3.15
							YBR188C									0.98	1	0.86	0.83	0.94	0.98	0.94
							YBR190W									0.81	0.83	0.71	0.55	0.47	0.59	0.53
							YBR192W									0.96	0.95	1.04	1	1.1	0.92	0.93
							YBR193C									0.65	0.74	0.77	0.77	0.7	0.8	0.74
							YBR194W									0.61	0.76	0.82	0.88	0.83	0.84	0.75
							YBR195C									0.67	0.57	0.56	0.63	0.6	0.79	0.78
							YBR197C									0.6	0.5	0.48	0.53	0.49	0.68	0.64
							YBR198C									1.06	0.74	0.72	0.79	1.08	0.87	1.05
							YBR200W									0.73	0.66	0.66	0.66	0.84	0.73	0.77
							YBR201W									1.07
							YBR202W			16						0.76	0.42	0.43	0.4	0.59	0.4	0.41
							YBR204C					23				0.6	1.17	1.35	1.25	1.38	1	0.77
							YBR205W									1.35	1.54	1.45	1.39	1.5	1.7	1.45
							YBR206W									2.65	3.01	2.58	2.41	3.01	2.81	2.94
							YBR207W									1.62	2.03	1.84	1.83	2.02	1.98	2.02
							YBR209W
							YBR210W									1.6	1.96	1.52	1.54	1.67	1.67	1.45
							YBR211C					11				1.26	1.48	1.43	1.21	1.02	1.2	1.3
							YBR213W									1.14	0.93	0.86	1.05	0.63	0.85	0.82
							YBR214W									1.44	3.71	4.14	3.78	2.91	2.39	1.85
							YBR215W									1.59	1.22	1.37	1.22	1.18	1.22	1.58
							YBR216C									1.06	1.01	1.11	1.03	1.33	0.91	1.1
							YBR217W									2.05	2.01	1.88	1.7	1.37	1.76	1.85
							YBR219C									1.16	0.95	0.86	0.84	0.9	1.11	1.21
							YBR220C									1.23	0.95	0.7	0.82	1.09	1.19
							YBR222C								70	0.97	1.36	1.65	2.34		1.7	2.44
							YBR223C									2.97			2.73	2.22		0.86
							YBR224W
							YBR225W									1.05	1.14	1.21	1.2	1.28	1.07	1.11
							YBR226C									0.9	0.86	0.89	1.14	0.6	0.53	0.55
							YBR227C			48						0.54	0.54	0.56	0.5	0.45	0.47	0.55
							YBR228W					29				0.9	1.03	0.86	0.91	0.99	0.78	0.93
							YBR229C									0.95	0.83	0.95	1.21	1.34	0.89	0.99
							YBR230C			98						2.16	12.39	14.94	17.89	14.73	4.03	3.03
							YBR231C									0.67	0.99	0.92	1.14	1.25	1.12	1.03
							YBR232C
							YBR233W									0.36	0.41	0.49	0.49	0.61	0.61	0.61
							YBR234C									3.47	5.33	5.11	5.18	5.11	4.45	3.3
							YBR236C									1.12	1.14	1.07	1.05	1.2	1.01	1.17
							YBR237W									0.55	0.41	0.51	0.44	0.47	0.37	0.52
							YBR238C									0.9	0.2	0.14	0.14	0.18	1.02	0.44
							YBR239C									0.32	0.23	0.25	0.23	0.27	0.27	0.29
							YBR240C
							YBR241C									0.68	1.16	1.5	2.45	2.21	1.67	1.13
							YBR242W									1.64	1.2	0.82	0.95	1.01	1.31	1.65
							YBR243C									1.16	1.32	1.15	1.26	1.43	1.42	1.68
							YBR244W								198	2.44	13.22	10.89	8.2	7.75	6.34	3.93
							YBR246W									1.66	1.31	1.18	1.2	1.4	1.74	1.48
							YBR247C			12						1.21	0.32	0.25	0.27	0.39	0.65	0.9
							YBR250W		14		16
							YBR251W									0.65	1.06	0.99	1.01	0.88	0.63	0.59
							YBR253W									0.99	1.42	1.1	1.19	1.16	1.15	1.14
							YBR254C									1.34	1.62	1.14	1.21	1.33	1.45	1.48
							YBR255W									0.51	0.56	0.62	0.55	0.66	0.52	0.54
							YBR256C									2.18	5.23	5.6	4.95	4.81	3.7	3
							YBR257W									1.02	0.91	0.88	0.88	0.93	1	0.98
							YBR258C		91							0.72	0.79	0.74	0.66	0.73	0.77	0.61
							YBR259W									0.7	0.64	0.67	0.64	0.78	0.83	0.99
							YBR260C									0.61	0.66	0.83	0.76	1	0.87	0.62
							YBR262C									1.99	3.17	3.04	3.21	2.7	2.8	2.08
							YBR264C									0.97	1.21	1.12	1.02	1.01	1.14	1.09
							YBR265W									0.97	1.03	0.95	0.97	1.14	1.16	1.08
							YBR266C
							YBR267W									1.15	0.38	0.28	0.42	0.47	1.13	1.02
							YBR268W									1.41	2.5	2.85	2.6	2.46	2.03	1.38
							YBR269C								91
							YBR270C
							YBR271W
							YBR272C									0.8	1.01	1.06	0.94	1.01	1.03	0.96
							YBR273C									1.45	2.41	3.02	2.53	2.58	2.39	1.97
							YBR274W		19							0.97	0.86	1.02	1.01	1.19	1.19	1.14
							YBR276C									1.2	0.8	0.84	0.79	1.07	1.2	1.27
							YBR277C
							YBR278W									0.91	1.15	1.07	0.93	0.99	1.01	1.06
							YBR280C									0.42	0.71	0.95	1.12	0.89	0.47	0.44
							YBR281C							47		1.01	0.92	1.06	0.96	0.92	0.95	0.95
							YBR282W									2.04	3.6	3.85	3.7	3.05	2.26	1.74
							YBR283C									4.1	3.9	3.9	4.21	4.64	4.21	3.64
							YBR284W					48
							YBR285W									0.84	1.4	2.64	6.41	1.92	2.16	1.27
							YBR287W									3.35	6.2	6.51	7.08	5.67	8.18	4.24
							YBR288C									1.1	1.18	1.09	1.01	1.1	1.03	1.03
							YBR289W									0.88	0.81	0.9	0.82	0.93	0.79	0.87
							YBR290W
							YBR291C									2.33	1.82	1.33	1.43	1.5	1.5	1.66
							YBR292C									0.72	0.59	0.48	0.61	0.69	0.76	0.76
							YBR294W
							YBR296C									0.9	0.39	0.33	0.47	0.62	0.86	0.34
							YBR297W									0.29	0.71	0.82	0.61	0.37	0.26	0.27
							YBR298C									0.36	0.68	0.7	0.5	0.36	0.23	0.28
							YBR299W
							YBR300C									0.26	0.18	0.15	0.18	0.16	0.21
							YBR301W									0.42	0.4	0.42	0.44	0.47	0.59	0.53
							YBR302C									1.73	2.43	2.35	2.24	2.38	2.45	2.24
							YCL001W									1.56	3.54	1.99	1.44	1.44	1.04	2.07
							YCL002C									1.29	1.18	0.98	0.9	0.92	1.14	1.12
							YCL004W
							YCL005W									0.76	0.74	0.66	0.65	0.62	0.78	0.74
							YCL006C
							YCL007C									0.67	0.87	0.72	0.64	0.6	0.75	0.62
							YCL008C									0.71	0.73	0.78	0.81	0.85	0.78	0.62
							YCL010C									0.99	1.03	1.09	1.12	1.16	0.89	0.96
							YCL011C									4.42	6.56	5.36	4.3	3.93	3.77	5.11
							YCL012W
							YCL016C									0.65	0.86	0.7	0.74	0.77	0.71	0.93
							YCL017C									1.34	1.44	1.34	1.34	1.68	1.38	1.64
							YCL020W
							YCL022C
							YCL023C									0.48	0.38	0.34	0.36	0.37	0.3	0.31
							YCL024W		3
							YCL025C									1.81	2.48	2.64	2.6	2.56	1.97	2.1
							YCL026C-B		16	37	183	492	599	749	779
							YCL027W									0.73	0.72	0.84	0.85	0.77	0.65	0.91
							YCL028W									2.26	2.68	2.56	2.27	2.57	2.52	2.59
							YCL029C								444	0.74	0.45	0.46	0.48	0.51	0.61	0.62
							YCL031C									2.48	1.94	1.62	1.46	1.49	1.84	1.85
							YCL032W									1	1.17	1.24	1.11	1.03	0.96	1
							YCL033C									1.49	2.78	2.84	2.9	2.7	2.37	2.4
							YCL034W									1.46	2.85	2.95	2.95	2.45	1.6	2.06
							YCL036W					36				1.88	0.68	0.79	0.96	0.81	1.22	1.6
							YCL038C									0.8	1.09	0.99	1.59	1.54	1.74	1.41
							YCL040W								1500	2.72	27.88	39.7	49.21	34.08	16.23	7.68
							YCL041C
							YCL042W									0.76	4.51	6.66	5.33	6.61	3.28	1.77
							YCL045C									1.89	1.64	1.5	1.55	1.64	1.1	1.64
							YCL046W
							YCL047C									0.71	0.78	0.66	0.64	0.75	0.89	1.11
							YCL048W									0.91	1.15	0.84	0.95	0.69	0.84	0.76
							YCL049C									0.53	0.71	0.75	0.9	1.13	1.55	0.95
							YCL052C									0.78	1.17	1.49	1.29	1.25	1.06	0.96
							YCL054W						11			2.01	0.54	0.36	0.54	0.64	1.11	1.49
							YCL055W									1.1	1.43	1.67	1.68	1.88	1.8	1.67
							YCL056C									1.67	2.57	3.12	3.03	3.36	2.79	2.1
							YCL058C									1.81	2.06	1.54	1.9	1.57	2.09	2.13
							YCL059C									2.71	1.3	0.46	0.38	0.51	1.68	2.33
							YCL061C		12							0.9	0.64	0.56	0.64	0.65	0.64	0.65
							YCL063W									0.6	0.33	0.34	0.31	0.39	0.33	0.4
							YCL064C									4.83	7.9	11.17	10.28	10.35	7.12	5.32
							YCL065W
							YCL066W
							YCL067C									1.62	1.62	1.81	1.91	2.12	2.41	1.51
							YCL068C									0.25	0.26	0.3	0.26	0.33	0.24	0.21
							YCL069W
							YCL073C									0.94	1.16	1.22	1.11	1.09		0.85
							YCL074W
							YCL075W
							YCL076W
							YCR001W
							YCR002C									1.72	2.21	2.05	1.72	2.11	2.18	2.14
							YCR003W									1.24	2.03	2.4	1.95	1.75	1.38	1.12
							YCR005C									1.55	2.54	5.36	5.32	5.25	8.77	2.02
							YCR006C									0.46	0.35	0.39	0.28	0.41	0.43
							YCR007C									0.41	0.28	0.56	0.58	0.5	0.84	0.47
							YCR008W									1.02	0.88	1	0.94	1.16	1.14	1.07
							YCR009C									2.7	3.53	3.98	3.34	2.85	3.49	2.89
							YCR010C
							YCR013C									26.31	54.1	54.86	59.61	58.79	74.93	42.45
							YCR014C									0.83	0.57	0.63	0.64	0.63	0.61	0.78
							YCR015C									0.96	0.82	0.95	1.04	0.7	1.14	0.99
							YCR016W									2.5	1.07	0.65	0.72	0.95	1.5	1.9
							YCR017C									3.63	4.38	4.15	4.03	3.41	2.7	3.1
							YCR018C									1.11	0.85	1.03	0.9	0.98	0.99	0.8
							YCR019W									0.44	0.47	0.5	0.55	0.37	0.53	0.5
							YCR020C									1.03	1.08	0.87	0.86	1.03	1.05	0.98
							YCR020C-A									2.81	2.75	2.53	2.89	2.25	3.48	3.76
							YCR021C									4.03	18.01	7.02	3.3	2.87	35.04	4.38
							YCR022C
							YCR023C									1.06	0.99	0.97	0.99	1.09	1.01	1.24
							YCR024C									0.56	0.95	1.05	0.89	1.07	0.69	0.69
							YCR024C-A									2.54	1.77	1.64	1.46	1.67	2.13	1.9
							YCR025C
							YCR026C							21		1.67	1.39	1.36	1.58	1.7	1.86	1.76
							YCR027C									0.5	0.52	0.52	0.5	0.48	0.53	0.44
							YCR028C									1.69	1.61	0.97	1.39	1.24	1.85	0.76
							YCR028C-A			637			443	406	468
							YCR030C									1	1.32	1.62	1.77	1.68	0.88	1.07
							YCR032W		8							0.8	0.8	0.79	0.73	0.76	0.75	0.65
							YCR034W									4.01	3.37	2.21	2.05	2.45	2.93	3.56
							YCR035C									1.8	1.28	0.99	1.13	1.3	1.75	2.07
							YCR036W									1.4	2.61	2.96	3.11	2.96	2.88	2.32
							YCR037C									1.4	0.95	1.33	1.5	1.59	1.26	1.59
							YCR038C						85			0.19	0.22	0.21	0.22	0.22	0.16	0.2
							YCR039C									1.83	1.86	1.75	1.97	2.11	2.36	2.6
							YCR040W
							YCR041W
							YCR042C								14	0.75	0.61	0.58	0.57	0.71	0.46	0.65
							YCR043C									2.21	2.43	1.79	1.77	1.9	1.77	2.15
							YCR044C									0.85	1.05	0.98	0.97	0.97	0.84	0.75
							YCR045C
							YCR046C									0.97	1.81	2.1	2.13	2.1	1.57	1.15
							YCR047C									1.62	1.1	1.11	1.36	1.17	2.38	2.48
							YCR048W									0.87	0.76	0.58	0.68	0.61	0.77	0.94
							YCR049C
							YCR050C
							YCR052W									1.42	1.28	1.21	1.18	1.33	1.2	1.42
							YCR054C									0.39	0.23	0.21	0.23	0.26	0.31	0.36
							YCR059C									1.36	1.03	0.65	0.84	0.89	1.83	1.6
							YCR061W
							YCR062W
							YCR063W									0.49	0.32	0.27	0.37	0.39	0.51	0.37
							YCR064C
							YCR065W									0.77	0.46	0.53	0.6	0.73	0.51	0.79
							YCR066W									0.95	0.95	1.22	1.05	1.19	1.08	0.92
							YCR067C									0.99	1.05	1.13	1.21	1.19	0.9	0.86
							YCR068W									0.26	0.19	0.27	0.35	0.37	0.29	0.32
							YCR069W									1.11	1.55	1.52	1.55	1.61	1.42	1.25
							YCR071C									0.94	1.47	1.46	1.46	1.46	1.23	0.92
							YCR072C									1.27	0.38	0.24	0.46	0.47	0.93	0.96
							YCR075C									0.69	1.11	1.11	1.07	1.12	0.77	0.8
							YCR076C									0.98	1.89	1.91	1.71	1.89	1.78	1.46
							YCR077C					39				1.41	0.92	0.97	1.1	1.19	1.38	1.25
							YCR079W									0.81	1.19	1.37	1.22	1.34	1.13	0.98
							YCR081W									0.72	0.76	0.77	0.76	0.74	0.8	0.72
							YCR082W									3	5.47	6.33	6.33	7.43	6.74	4.57
							YCR083W
							YCR085W
							YCR086W									0.65	0.75	0.83	0.79	0.73	0.72	0.8
							YCR087W									1.13	0.92	0.57	0.57	0.59	0.75	0.98
							YCR089W									0.67	0.7	0.73	0.67	0.63	0.61	0.83
							YCR090C									2.51	3.31	2.56	2.63	2.36	2.61	2.46
							YCR091W									0.22	0.39	0.61	0.5	0.32	0.2	0.24
							YCR092C		22							0.58	0.5	0.51	0.58	0.64	0.43	0.57
							YCR094W									0.77	0.57	0.59	0.59	0.7	0.6	0.81
							YCR095C									0.84	0.77	0.77	0.7	0.72	0.77	0.78
							YCR096C									1.61	1.61	1.79	1.73	2.1	2.33	2.19
							YCR098C									0.21	0.17	0.27	0.41	0.65	0.82	0.28
							YCR099C									0.53	0.39	0.44	0.44	0.46	0.4	0.41
							YCR100C
							YCR101C
							YCR102C									0.44	2.42	2.54	1.97	2.11	2.74	3.77
							YCR103C
							YCR104W									1.96	1.9	1.82	2.05	2.11	2.23	2.13
							YCR105W		83							0.28	0.27	0.35	0.46	0.42	0.4	0.36
							YCR106W
							YCR107W
							YDL001W									0.82	0.61	0.58	0.57	0.62	0.58	0.7
							YDL002C									1.61	1.53	1.42	1.22	1.3	1.3	1.38
							YDL003W									1.21	0.74	0.59	0.51	0.82	0.55	1.24
							YDL005C									1.25	1.02	0.99	0.8	1.07	0.69	1.05
							YDL006W									0.89	1.12	0.89	0.89	0.83	0.89	0.89
							YDL007W									3.78	7.3	9.37	8.33	9.24	8.33	5.35
							YDL008W									1.65	2.26	1.89	1.88	1.97	2.46	1.83
							YDL009C									1.01	1.49	1.54	1.19	1.19	1.02	0.95
							YDL010W									1.31	1.9	1.95	1.69	1.55	1.21	1.31
							YDL011C									1.03	1.27	1.22	1.18	1.07	0.91	0.81
							YDL012C									2.09	2.3	1.67	1.55	1.73	2.21	2.4
							YDL013W									1.31	0.87	0.98	0.98	1.05	0.94	1.28
							YDL014W			145						11.29	8.68	3.97	3.05	4.62	8.27	10.76
							YDL015C									3.92	3.76	3.3	3.68	3.76	3.95	3.76
							YDL016C									5.74	6.59	4.89	5.5	4.99	5.46	5.39
							YDL017W									0.37	0.3	0.27	0.27	0.33	0.39	0.36
							YDL018C									1.26	2.13	2.23	2.04	1.96	1.18	1.29
							YDL019C									1.2	1.59	1.88	1.63	1.61	0.77	0.84
							YDL020C									1.11	3.17	2.98	2.86	2.65	1.64	2.4
							YDL021W									0.32	0.83	0.69	1.52	2.09	1.23	0.86
							YDL022W								194	5.77	17.85	17.97	17.24	12.71	5.65	7.1
							YDL023C
							YDL024C									0.69	0.6	0.7	1.32	1.42	1.34	1.03
							YDL025C									0.53	1.04	1.11	1.29	1.24	0.65	0.69
							YDL026W
							YDL027C									0.89	1.65	2.29	1.46	2.12	1.81	1.46
							YDL028C									2.2	2.5	2.76	2.42	2.72	2.2	2.2
							YDL030W									1.43	1.55	1.74	1.46	1.62	1.36	1.49
							YDL031W			7						1.93	0.75	0.62	0.67	0.73	1.33	1.4
							YDL032W
							YDL034W
							YDL036C									1.32		1.9	1.3	1.64		1.05
							YDL037C
							YDL038C									1.47	0.48	0.29	0.4	0.35	1.95	0.47
							YDL039C									2.22	0.75	0.38	0.44	0.47	3.03	0.93
							YDL041W									0.94	0.58	0.58	0.56	0.68	0.63	0.91
							YDL043C		127							0.97	0.81	0.78	0.77	0.8	0.88	0.78
							YDL044C									1.1	1.2	1.32	1.28	1.12	1.05	1
							YDL045C									0.86	1.24	1.21	1.15	1.11	1.23	0.93
							YDL045W-A
							YDL047W									1.34	1.13	1.11	0.96	1.32	1.8	1.19
							YDL048C								17	1.23	1.18	0.8		0.68	3.01	0.52
							YDL049C
							YDL050C									2.35	1.55	1.2	0.87	1.27	1.91	2.25
							YDL052C									2.05	2.49	2.82	2.63	2.8	2.32	2.51
							YDL053C									2	2.09	1.95	1.91	2.46	2.14	2.08
							YDL054C									1.39	1.72	2.02	2	1.79	1.89	1.63
							YDL056W		21							1.14	1.43	1.37	1.1	1.15	0.93	1.12
							YDL057W									0.67	0.63	0.84	0.83	0.95	1.18	0.87
							YDL059C									0.62	0.89	0.93	0.96	1	0.83	0.6
							YDL061C									18.54	24.46	15.06	9.27	9.08	15.91	13.02
							YDL062W
							YDL063C									1.67	0.42	0.38	0.35	0.4	1.15	0.92
							YDL064W									2.77	3.14	2.79	2.5	2.45	3.18	2.75
							YDL067C									3.72	5.99	4.45	3.49	3.74	3.69	3.23
							YDL068W
							YDL069C									1.41	1.68	1.42	1.13	1.65	1.48	1.35
							YDL070W									4.15	4.12	5.32	4.7	4.9	6.2	4.7
							YDL071C
							YDL072C									3.87	9.53	11.57	10.57	9.93	10.65	5.95
							YDL074C									1.84	1.61	1.41	1.01	1.31	0.98	1.37
							YDL076C									1.21	1.77	1.6	1.51	1.27	1.34	1.32
							YDL079C									0.93	2.23	1.36	1.27	1.15		0.54
							YDL080C									1.43	1.59	1.6	1.43	1.21	1.59	1.51
							YDL084W									6.75	7.75	6.43	5.11	5.48	5.67	6.7
							YDL085W		562					539
							YDL087C
							YDL088C									1	1.05	1.01	0.82	1.08	0.91	0.8
							YDL089W					65				1.37	1.73	1.62	2.14	2.15	1.15	1.43
							YDL090C									0.76	0.8	0.84	0.78	0.85	0.7	0.73
							YDL091C									0.84	1.24	1.35	1.37	1.37	1.12	0.81
							YDL092W									3.89	6.02	4.59	4.22	4.34	4.05	3.91
							YDL093W									1.38	0.88	0.93	1.12	0.91	0.86	1.19
							YDL094C									0.98	1.05	0.9	1.07	1.11	1.25	1.13
							YDL095W									2.62	1.8	2.14	2.84	3.43	3.01	3.24
							YDL096C
							YDL097C									2.74	5.34	5.53	5.8	6.13	4.91	3.07
							YDL098C									0.86	1.07	1.11	1.07	1.02	1.05	1.07
							YDL099W									1.13	1.11	1.25	1.29	1.47	1.05	1.25
							YDL100C									5.03	7.21	8.76	7.95	9.65	9.99	7.89
							YDL101C								30	0.66	0.68	0.72	0.67	0.7	0.49	0.73
							YDL104C
							YDL105W									1.03	0.76	0.75	0.8	0.75	0.59
							YDL106C
							YDL107W									0.66	0.97	0.88	0.99	0.73	0.66
							YDL108W
							YDL111C									1.87	1.3	1.06	1.11	1.43	2.12	1.71
							YDL113C									1.38	1.81	1.6	1.72	1.39	1.13	0.97
							YDL114W
							YDL115C									0.86	1.3	1.35	1.2	1.2	1.13
							YDL116W									0.97	1.43	1.1	0.93	0.88
							YDL117W	45							84	0.55	0.39	0.45	0.42	0.47
							YDL118W
							YDL119C									0.89	1.14	1.33	1.32	1.33
							YDL120W								91	1.34	2.05	1.66	1.62
							YDL122W						28			2.3	1.58	1.64	1.45	2.03	2.32	2.19
							YDL123W									0.94	0.99	1.05	1.14	1.2	1.55	1.04
							YDL127W									0.68	0.48	0.55	0.69	1.13	0.9	0.81
							YDL128W									2.1	2.38	2.59	3.23	3.56	3.39	2.25
							YDL129W									0.56	0.17	0.12	0.22	0.13	0.25	0.29
							YDL130W	40747	48726	32098	31356	60079	62768	46411	41056
							YDL131W
							YDL133W									0.95	1.19	1.36	1.24	1.34	0.93	0.91
							YDL134C			253						1.62	2.45	2.54	2.1	2.42	2	1.79
							YDL135C									2.05	2.82	2.52	2.28	2.28	2.34	2.21
							YDL137W									9.22	17.08	18.69	17.68	19.48	23.01	18.56
							YDL138W		16							1.25	0.89	1.23	1.16	1.11	0.93	0.91
							YDL139C									0.43	0.36	0.38	0.39	0.41	0.35	0.44
							YDL141W									0.81	0.58	0.65	0.66	0.72	0.66	0.75
							YDL142C									1.21	2.13	2.25	1.88	1.85	1.72	1.47
							YDL144C									1.98	2.86	3.28	3.22	3.19	3.7	2.06
							YDL146W									0.55	0.85	0.97	0.86	0.69	0.79	0.62
							YDL147W									4.45	7.38	8.02	8.54	7.91	7.91	5.63
							YDL148C									1.68	0.37	0.25	0.2	0.44	0.67	1.04
							YDL149W									0.6	0.64	0.75	0.75	0.83	0.58	0.51
							YDL150W									0.99	0.44	0.33	0.35	0.48	0.65	0.74
							YDL151C
							YDL152W									0.87	0.29	0.23	0.2	0.28	0.42	0.56
							YDL154W									0.59	0.45	0.55	0.48	0.35	0.42	0.45
							YDL155W									1.01	0.99	0.88	0.86	0.92	0.7	1.01
							YDL156W									0.44	0.31	0.34	0.35	0.32	0.28	0.4
							YDL157C									4.15	5.99	4.35	3.76	4.51	5.55	5.55
							YDL158C									1.35	1.58	1.45	1.32	1.34	1.46	1.43
							YDL159W									0.55	0.55	0.47	0.46	0.54	0.58	0.55
							YDL161W					9
							YDL162C
							YDL163W
							YDL164C									0.9	0.7	0.69	0.69	0.8	0.76	0.86
							YDL165W									1.69	2.25	1.96	1.84	2.18	2.25	2.08
							YDL166C									1.78	1.44	1.42	1.38	1.52	1.99	1.97
							YDL169C
							YDL170W									0.95	0.75	0.71	0.58	0.64	0.68	0.83
							YDL172C
							YDL173W									2.86	2.74	2.58	2.67	3.52	3.8	3.8
							YDL174C									2.03	2.69	3.07	3.16	3.29	2.57	2.41
							YDL175C									0.61	0.62	0.57	0.52	0.61	0.61	0.54
							YDL176W									0.63	0.47	0.49	0.53	0.42	0.56	0.64
							YDL177C									0.81	0.9	0.82	0.8	0.88	0.87	0.87
							YDL178W	144
							YDL179W									0.68	0.61	0.64	0.71	0.91	0.83	0.61
							YDL180W									1.57	3.82	3.17	2.92	2.8	1.53	1.83
							YDL181W									1.83	5.51	4.86	3.54	2.91	1.88	1.59
							YDL182W									4.44	5.47	4.17	3.92	4.63	4.93	4.32
							YDL183C									0.41	0.51	0.55	0.6	0.57	0.5	0.41
							YDL184C									125.56	209.71	166.83	130.89	107.8	92.56	88.78
							YDL186W
							YDL187C
							YDL189W									0.91	0.66	0.57	0.58	0.75	0.72	0.82
							YDL190C
							YDL191W									28.84	37.01	20.82	13.83	13.55	16.68	19.03
							YDL192W									24.24	44	36.74	34.76	35.49	41.05	35.99
							YDL193W									0.99	1.23	1.43	1.35	1.67	1.7	1.63
							YDL194W						41	9
							YDL196W
							YDL197C									0.78	0.86	0.99	0.91	0.89	0.75	0.9
							YDL198C									1.59	3.01	2.85	2.62	2.38	1.78	1.56
							YDL199C			76				78
							YDL200C									1.57	2.04	2.13	2.38	2.14	2.01	2.39
							YDL202W									1.07	1.55	1.59	1.49	1.38	1	1.04
							YDL203C									0.66	0.43	0.49	0.62	0.67	0.59	0.63
							YDL204W									0.48	2.52	6.55	9.39	5.66	1.28	0.74
							YDL205C									0.65	0.49	0.39	0.44	0.37	0.5	0.48
							YDL206W									0.6
							YDL207W									0.85
							YDL208W				1070
							YDL209C
							YDL210W
							YDL211C
							YDL212W									7.45
							YDL213C								205	3.5
							YDL214C								152
							YDL215C									1.34	1.46	2.02	2.47	2.44	2.39	2.07
							YDL216C
							YDL217C
							YDL218W
							YDL219W									2.32	3.1	2.72	2.13	2.09	2.36	2.43
							YDL220C									0.98	0.93	1.09	1.19	1.08	0.88	0.85
							YDL221W
							YDL222C						31
							YDL224C							79		1.31	1.23	1.47	1.49	1.61	1.14	1.23
							YDL225W									1.44	1.35	1.51	1.31	1.45	1.21	1.55
							YDL227C									1.45	1.35	1.49	1.1	1.21	1.19	0.83
							YDL228C
							YDL230W									0.96	1.97	2.18	1.72	1.84	1.56	1.34
							YDL231C									1.22	0.66	0.86	0.84	1.02	1.08	0.99
							YDL232W									3.96	5.05	4.81	4.58	4.27	4.3	3.52
							YDL233W									0.62	0.66	0.98	0.88	1.06		0.81
							YDL234C									0.99	1.52	2.32	1.43	1.94	2.63	1.72
							YDL235C									1.67	2.07	1.57	1.45	1.84	2.1	1.67
							YDL237W		73							1.26	1.69	1.82	1.83	1.85	1.6	1.16
							YDL238C						7			0.7	1.04	1.37	1.08	1.33	0.87	0.47
							YDL239C						7
							YDL241W
							YDL242W
							YDL243C									0.82	1.63	4.7	2.05	2.13	2.56	4.39
							YDL244W									0.4	0.53	0.59	0.67	0.54	0.87	0.67
							YDL245C					91
							YDL246C
							YDL247W
							YDL248W									0.84	1.09	1.06	0.95	0.89	1.08	0.75
							YDR003W									1.6	4.88	4.11	4.31	4.05	2.9	2.53
							YDR004W							57
							YDR005C									1.13	1.29	1.29	1.01	1.18	1.27	1.18
							YDR006C									1.6		1.42	1.37	1.55	1.97	1.63
							YDR007W									1.76	2.32	2.27	2.06	2.41	2.15	2.15
							YDR008C									0.69	0.99	0.93	0.84	0.9	0.78	0.79
							YDR009W
							YDR010C
							YDR013W									0.86	0.85	0.78	0.62		0.79	0.86
							YDR014W									0.61	0.56	0.54	0.43	0.41	0.49	0.52
							YDR014W-A					16
							YDR015C
							YDR016C									1.32	1.77	2.06	1.75	1.63	1.35	1.29
							YDR018C	8		105
							YDR020C									0.91	0.58	0.55	0.46	0.52	0.65	0.66
							YDR021W									1.12	0.39	0.36	0.39	0.38	0.55	0.77
							YDR024W									0.82	0.89	0.61	0.5	0.53	0.6	0.61
							YDR025W									19.9	22.7	12.77	5.96	8.37	11.92	12.34
							YDR026C									0.92	0.81	0.72	0.64	0.74	0.69	0.8
							YDR029W
							YDR030C									1.12	0.97	1.15	0.97	0.85	1.02	1.12
							YDR031W									1.97	4.19	4.78	5.2	5.81	3.75	2.97
							YDR033W									18.94	16.26	10.22	9.09	9.67	14.16	10.44
							YDR034C									1.2	0.95	1.09	0.91	0.93	0.95	1.06
							YDR036C									1.28	1.47	1.55	1.61	2.06	1.93
							YDR039C									3.23	2.23	2.87	2.99	3.27	3.39	3.39
							YDR040C
							YDR041W									2.21	4.23	4.73	4.29	4.23	2.45	1.89
							YDR042C
							YDR043C									0.38	0.92	0.98	1.1	1.15	0.46	0.59
							YDR046C									1.34	2.03	1.58	1.44	1.45	1.68	0.91
							YDR047W									1.92	2.34	2.11	2.17	2.33	2.79	1.79
							YDR048C
							YDR049W									0.82	0.54		0.62	0.66	0.58	0.61
							YDR051C								56	1.21	1.44	1.16	1.13	0.99	1.14	1.01
							YDR052C			30						0.82	0.69	0.76	0.58	0.72		0.62
							YDR053W
							YDR054C									1.21	1.43	1.81	1.56	1.75	1.34	1.24
							YDR055W									3.14	4.23	5.24	9.79	11.56	16.12	3.46
							YDR056C									1.69	2.47	2.38	2.38	2.47	2.89	1.82
							YDR057W							16		0.7	0.71	0.63	0.75	0.69	0.78	0.67
							YDR058C									0.8	1.3	1.57	1.84	1.74	1.59	1.48
							YDR059C									1.32	3.21	3.59	4.84	4.51	4.3	2.15
							YDR060W					8				1.28	0.48	0.44	0.53	0.39	0.66	0.86
							YDR061W									0.9	1.3	1.27	1.36	1.35	1.17	1.09
							YDR063W									2.08	3.37	2.89	2.84	2.61	2.16	1.91
							YDR065W									0.81	0.87	0.8	0.94	1.06	1.04	0.85
							YDR066C									0.65	0.82	0.88	0.82	0.97	0.87	0.74
							YDR067C									1.11	1.37	1.36	1.25	1.3	1.34	1.11
							YDR070C									1.24	2.63	6.47	6.89	8.48	3.67	1.78
							YDR072C									1.79	2.17	1.99	2.03	2.22	2.57	2.1
							YDR073W									0.87	1.4	1.29	1.18	1.24	1.02	0.83
							YDR075W									0.9	0.51	0.4	0.48	0.57	0.79	0.7
							YDR076W									0.39	0.32	0.32	0.44	0.45	0.42	0.45
							YDR077W									25.25	43.35	56.42	102.4	121.77	120.93	62.17
							YDR078C									0.93	1.28	1.3	1.35	1.43	1.41	1.15
							YDR079W									1.72	2.81	3.05	2.81	3.01	2.69	2.08
							YDR080W						28			1.72	1.62	1.7	1.43	1.66	1.66	1.57
							YDR081C						24			0.82	0.47	0.47	0.43	0.62	0.61	0.7
							YDR082W									0.76	0.62	0.58	0.74	0.73	0.85	0.91
							YDR083W									2.48	0.82	0.45	0.45	0.69	1.43	1.88
							YDR084C									1.41	1.94	1.78	1.76	1.61	1.62	1.47
							YDR086C									9.01	13.74	12.13	9.26	9.92	11.16	9.65
							YDR087C									1.95	0.66	0.41	0.41	0.96	1.46	1.83
							YDR088C									0.78	0.61	0.61	0.59	0.67	0.64	0.68
							YDR089W									0.97	0.76	0.85	0.68	0.8	0.43	0.49
							YDR090C									0.85	0.85	0.87	0.97	0.86	0.93	0.97
[truncated: 4,192 more rows]

## Sheet: input_SodiumChloride
YORF	R0	R30	R60	R90	R120	R240	P0	P30	P60	P90	P120	P240
YAL019W	56.27	40.8531	49.3123	50.3805	44.9298	44.178	6796.71	7136.61	7326.92	7003.97	6869.4	6418.73
YAL021C	47.2	41.5526	49.0524	44.8096	48.1758	48.0137	2779.05	2605.83	2986.15	3024.46	2900.18	2758.73
YAL023C	185.85	98.6437	235.138	203.724	205.631	207.337	6512.44	6512.49	6621.12	6726.8	6967.9	6748.42
YAL035W	291.93	182.347	274.396	261.972	240.116	268.255	13406.2	13624.4	13630	13173.2	12766.4	12280.5
YAL036C	201.82	103.853	129.968	148.744	146.232	164.758	11733.4	11651.9	11059.5	10566.9	9857.44	10017.5
YAL059W	69.38	33.6669	43.2136	55.6137	48.6449	62.5701	2835.84	2123.77	2291.95	2211.56	2353.72	1988.97
YAR002C-A	234.45	126.123	289.903	286.346	275.498	271.905	20675.4	18710.4	19018.4	18935.4	19185.6	18775.9
YAR002W	82.23	83.7204	78.6126	79.3841	84.1298	81.9798	4590.28	5650.22	5317.63	5289.72	4986.77	4792.4
YAR015W	297.9	206.123	191.107	138.77	200.372	177.588	4276.97	4196.94	4327.82	4140.38	3996.03	3804
YBL002W	1117.17	1190.2	1125.41	1575.18	1150.45	1694.97	443201	394366	303276	233532	134047	124445
YBL024W	101.03	65.3174	83.702	82.0197	76.6224	79.5179	16134.3	15725.4	15712.4	15350.6	15256.3	15168.8
YBL032W	136.75	76.1675	136.152	133.575	134.067	133.358	15576.3	17277.4	16252.5	14994.4	15726.1	14883.5
YBL035C	30.37	15.786	30.5359	25.7377	28.9244	31.1941	11222.1	11456.7	11221.8	10816.6	11735.4	9607.55
YBL036C	145.63	134.773	145.143	143.171	109.086	127.381	4888.82	5004.37	5048.14	4865.53	4847.9	4814.11
YBL039C	155.93	36.107	79.7158	95.3216	94.5254	128.563	57600	55156.9	52062	51307.5	49983.1	47946.5
YBL068W	75.37	36.7998	45.2016	47.1548	51.3393	51.9321	5281.1	4525.59	4629.5	4452.86	4436.3	4358.83
YBL076C	398.17	250.11	399.067	445.752	357.344	400.705	23281.9	21829.6	23032.1	23685.7	23778.4	23484.7
YBL079W	82.42	57.9213	63.1501	65.8945	57.9773	58.4131	1564.44	1449.24	1469.82	1598.92	1622.71	1552.84
YBL085W	64.38	51.6602	74.3958	68.1249	72.5664	64.3897	1040.17	1098.54	1126.24	1056.23	1092.62	1074.87
YBR023C	106.12	72.4618	102.509	102.262	102.151	100.657	1511.59	1987.4	2158.34	1542.17	1578.36	1402.19
YBR025C	574.43	416.175	524.586	457.951	654.948	633.058	36802.6	37296.6	36181.7	36171.1	36227.8	37641.4
YBR034C	209.38	74.1654	154.623	134.694	168.829	169.87	37569.7	36417	36080.2	33546.1	34463.3	31520.4
YBR049C	69.15	79.6959	72.0957	68.0282	63.3102	60.3717	7514.31	8546.66	8067.37	7410.71	7624.65	6902.69
YBR073W	66.75	47.9984	79.0665	61.7066	61.6078	58.1787	1267.52	1352.05	1145.46	1304.42	1315.09	1078.54
YBR084C-A	1302.38	1014.81	1804.05	1655.27	1387.65	1395.93	97742.6	91932.9	88214.7	88616	89112.4	91613.3
YBR084W	163.43	62.3196	113.778	124.778	124.46	130.241	11424	11225	10363.5	10028.6	9871.8	10218.8
YBR089C-A	55.72	34.4574	61.0219	59.1266	65.906	48.2783	4590.28	4699.59	4344.11	4318.05	4520.87	4521.22
YBR092C	283.95	53.0017	167.763	330.64	212.316	281.319	951.716	842.498	767.071	871.668	854.315	924.253
YBR093C	5.7	1.62662	0.922064	3.34214	2.31237	1.83007	1112.45	1114.89	880.912	816.142	774.225	594.018
YBR095C	49.58	52.1075	51.9147	47.3246	46.4349	37.8086	1629.89	1405.63	1460.43	1381.26	1510.83	1598.86
YBR101C	85.8	69.2476	59.4445	58.7487	61.954	69.5257	13112.9	12548.6	12469.7	12603.2	11950.1	11316
YBR106W	801.65	446.774	884.673	774.999	643.126	954.002	61807.8	57939.1	57378.1	54378.8	51814	47818
YBR112C	134.42	121.408	160.701	135.738	132.052	131.459	3890.12	3437.91	4208.09	4118.92	4239.17	3982.32
YBR121C	509.02	273.38	501.436	525.249	437.825	449.463	98424.7	96503.3	97028	98408.1	98579.8	99088.6
YBR130C	67.3	67.9833	67.3304	61.0919	58.8864	55.9075	1010.9	1011.93	873.157	823.009	794.053	886.317
YBR142W	79.37	28.6325	46.8394	48.3797	42.9992	47.9781	981.421	986.627	913.924	887.758	876.374	892.101
YBR143C	360.78	251.827	412.977	374.015	379.014	389.208	13112.9	12749.6	12910.1	12937.9	12980.5	13803.8
YBR155W	89.42	39.0792	51.2491	46.7131	48.3825	48.4243	672.127	665.07	612.474	584.295	572.578	521.918
YBR162C	1600.3	775.14	1552.74	2119.04	1519.04	2081.65	12316.7	13357.9	12751.2	12299.8	12938.2	14328.2
YBR171W	161.55	164.4	144.104	138.059	118.469	118.866	7820.7	7831.41	7991.92	8451.55	8765.83	8268.2
YBR172C	128.38	108.38	84.7423	100.385	90.319	80.273	486.132	467.037	447.691	439.521	447.636	406.6
YBR189W	2364.02	1471.29	2234.97	2566.2	2593.71	2940.59	63349.6	58090	59340.1	57702.1	58248.8	57832.1
YBR198C	56.93	55.3112	47.209	45.9069	43.6007	45.2885	14834.3	11834.8	12346.8	9803.96	12601.4	13913.5
YBR205W	113.22	59.94	87.6369	73.9048	86.6003	82.9051	704.481	536.114	550.81	594.452	640.571	612.756
YBR208C	38.22	26.7145	23.3971	68.9102	48.7347	44.7635	951.716	1025.78	1003.46	1043.73	1123.69	1150.99
YBR221C	457.25	321.665	413.813	471.389	446.435	446.049	9969.9	9982.18	10324.6	10690.4	10760.8	10564.7
YBR227C	46.78	53.7577	47.639	43.2466	41.4059	41.9929	10868.1	9027.38	12524.9	13679.6	15038.7	12233.5
YBR245C	63.35	47.7456	56.8292	50.9795	49.6252	54.3932	1498.3	1519.91	1539.23	1557.21	1527.7	1474.37
YBR247C	91.07	33.5272	59.9581	67.49	58.6432	63.2619	21578.1	19944.7	21137.5	20359.9	18967.2	18571.4
YBR248C	157.87	130.848	172.3	173.727	175.509	151.399	11846.5	12050.2	12058.7	12836.9	12776.8	14069.2
YBR252W	92.12	42.5544	82.9767	76.0364	80.6217	84.5579	4339.08	4114.5	4119.7	3800.92	3930.89	3907.07
YBR263W	116.8	48.5692	94.2916	100.642	101.164	107.338	17716	16491.8	17125.5	17105.2	16735.1	16293.9
YBR265W	82.52	67.2654	90.4772	96.3602	105.892	110.865	7696.48	5300.75	5400.07	6281.06	5378.3	6543.61
YBR267W	99.4	54.9584	63.2063	66.8048	69.5402	74.7009	830.424	759.49	765.414	770.616	767.727	790.427
YBR279W	107.37	133.596	125.149	116.714	94.8524	92.8064	1040.17	1187.07	1111.78	1066.26	1119.87	1042.73
YBR281C	33.37	39.7016	41.4288	31.247	29.6619	30.0707	1935.54	2099.8	2045.89	2072.33	1942.36	2078.95
YCL009C	551.77	339.74	616.651	745.457	811.369	777.541	15792.6	14916.3	14447.4	14686.6	14735.8	16755.2
YCL031C	333.85	304.429	242.461	257.878	249.65	234.604	2606.88	2744.02	2632.68	2525.21	2562.39	2489.15
YCL045C	290.22	233.865	314.876	295.421	263.762	265.718	2835.84	2707.04	2892.79	2806.67	2836.5	2720.5
YCL050C	454.72	393.291	411.412	288.847	308.465	317.582	19607	19167.6	20237.8	20389.9	20237.2	17857.5
YCL059C	305.83	100.268	167.076	179.968	151.434	185.432	4339.08	4566.57	4456.7	4250.07	4338.88	3781.42
YCL064C	29.17	46.8645	7.52757	29.035	23.1584	17.5618	36601.5	34453.3	35113.8	33591.7	32765.6	29816.1
YCR016W	108.92	51.1094	73.4659	72.3735	66.6953	69.6665	1847.73	1888.2	2027.27	1768.76	1670.5	1786.55
YCR034W	220.25	72.4142	196.519	195.241	166.036	213.939	3507.96	3386.58	3766.11	3417.2	3726.12	3418.21
YCR047C	48.78	20.534	27.7629	32.3307	37.2496	34.7101	1616.86	1765.83	1608.58	1477.12	1602.13	1447.15
YCR052W	63.73	51.5143	60.7192	51.8682	54.0322	50.3363	2474.93	2908.77	2664.15	2482.77	2367.86	2119.34
YCR053W	490.62	334.857	529.68	472.717	441.673	407.519	26000.4	24827.7	26821.9	26893.9	27132.5	26576.5
YCR057C	106.98	39.8499	58.4346	71.1738	69.7316	77.4268	16650.6	14435.8	14767.4	14359.5	14429.6	13218.1
YCR060W	81.08	54.1666	131.537	97.6591	105.015	120.086	1655.89	1888.25	1644.8	1540.57	1472.5	1258.8
YCR087C-A	75.48	27.2122	59.0002	63.3544	59.5495	74.337	3432.58	3822.94	3529.54	3189.1	3019.19	3099.93
YCR093W	130.18	142.428	92.1479	95.4886	85.5515	95.575	4297.64	3708.16	4482.56	4346.32	4145.69	4013.88
YDL040C	105.33	77.9231	108.111	101.834	85.4052	107.164	7597.55	7542.17	7930.44	7826.54	7690.01	7971.87
YDL058W	52.9	40.668	44.9863	42.5904	38.344	40.5272	2325.23	2459.77	2539.06	2621.78	2581.49	2551.12
YDL060W	85.88	38.1905	50.857	57.9917	52.4478	63.2399	1390.9	1206.33	1353.78	1283.11	1253.73	1206.41
YDL061C	366.85	210.548	473.571	500	528.814	540.567	5413.93	5346	5082.04	5132.52	5161.42	5077.07
YDL063C	54.4	17.4187	28.9568	39.3263	35.5657	42.2592	2595.3	2331.88	2292.65	2343.39	2219.05	2398.78
YDL064W	133.4	96.702	105.258	106.537	90.6345	95.6416	2595.3	2069.65	2696.77	2790.19	2571.61	2215.22
YDL065C	129.08	138.003	155.024	116.403	112.356	124.49	5347.39	4497.86	4625.08	5098.42	4409.51	3220.76
YDL078C	105.28	111.575	130.45	117.801	161.98	124.766	3302.38	3332.26	3467.44	3504.3	3493.03	3700.89
YDL082W	1496.9	1044.35	1489.49	2032.71	1780.33	1613.87	133101	177312	134304	157048	101541	132203
YDL084W	450.77	309.918	503.506	455.592	447.376	459.66	51687.4	49058.5	49459.9	49394.3	50129.2	50706.3
YDL092W	160.12	136.79	174.146	142.195	131.249	83.944	7995.65	8200.6	8261.55	8396.77	8413.85	7811.15
YDL095W	182.13	108.01	185.433	195.004	196.543	213.767	41519.7	38365.3	40697.7	40014.3	41203.4	39630.4
YDL099W	262.83	309.515	274.097	241.829	221.258	187.558	5215.07	5333.66	5777.93	5561.49	5232.79	4705.75
YDL100C	282.17	230.375	326.965	270.03	232.989	280.521	17332.2	16493.6	17287.9	17015.2	16465.3	15502.5
YDL112W	69.78	30.1857	42.7141	50.6762	44.4748	53.0446	861.143	810.234	812.103	802.358	789.518	807.603
YDL121C	118.4	57.6863	105.244	91.7613	77.8671	105.146	3258.69	3263.74	3047.38	2879.11	2795.28	2319.53
YDL122W	102.77	99.8228	93.4065	91.625	75.469	89.0332	8965.92	8790.09	9105.08	8925.53	8501.88	8952.55
YDL130W	2427	2028.82	1666.27	2146.21	3000.22	2183.28	22448.5	20085.7	19288.1	20385	20828.4	21448.1
YDL141W	56.9	45.2261	47.1935	48.8593	48.5171	51.2022	1972.87	2233.75	2273.12	1955.9	2005.41	1712.28
YDL143W	206.27	193.602	194.165	180.477	144.682	179.274	5534.98	5734.66	5633.76	5464.63	5268.78	5345.21
YDL171C	123.32	41.8039	71.7724	117.481	125.546	132.897	18915.4	19647.1	18341.6	18564.7	19654.2	22256
YDL192W	873.05	527.013	825.653	762.796	643.664	782.467	19342.6	16270.3	17798.7	16367.2	17115.4	18239.9
YDL201W	95.52	36.7419	65.8908	57.7248	61.2924	71.6058	2630	2742.87	2742.53	2310.74	2430.4	2265.17
YDL205C	7.55	6.07626	8.17146	7.88752	8.70436	8.14848	8480.52	8005.68	8356.47	6444.79	6554.19	8151.73
YDL213C	168.33	60.9287	173.072	140.461	110.601	141.599	8965.92	8452.1	8111.09	7971.61	7897.13	6991.72
YDL229W	2081.15	1263.32	1917.05	2457.62	2326.47	2893.89	170039	148885	152476	151566	156263	150394
YDR033W	1035.27	287.834	1265.86	1839.18	1742.64	1839.71	182462	195777	178858	197090	225034	253580
YDR060W	187.55	48.0058	105.1	110.498	103.632	110.021	15024.4	16021	14152.8	14284.2	13869.4	13622.7
YDR071C	231.8	250.64	263.233	227.275	211.849	265.656	8681.52	9238.51	9193.2	9223.5	8945.27	9514.87
YDR083W	79.1	26.0945	46.8494	50.4033	48.416	47.9978	2779.05	2733.42	2553.26	2542.68	2619.64	2409.58
YDR087C	76.9	31.8868	58.1588	50.5322	52.8902	60.8426	6964.27	5927.04	6215.4	6326.21	6019.21	6712.24
YDR089W	63.98	39.6456	50.9344	50.3571	54.2625	54.3411	172.148	155.905	150.769	141.929	135.46	146.112
YDR091C	141.82	70.0528	115.607	135.206	117.906	146.963	6278.44	5751.53	6048.95	6175.63	6207.29	6202.7
YDR097C	47.82	20.7293	45.5463	37.6863	38.4852	38.5336	5325.27	4876.97	5304.67	5569.5	5434.34	5175.42
YDR101C	138.1	36.901	77.6501	79.4922	86.748	91.2018	45117.5	44621.4	42944	40312.1	40502	37740.1
YDR120C	107.85	32.3416	64.0782	73.4275	68.027	75.3627	15545.5	14915.5	14607.9	14578.8	13920.5	13852
YDR152W	156.22	113.889	131.718	114.269	114.584	121.33	10293.7	6409.34	8751.66	9911.23	8702.65	7804.78
YDR165W	87.75	30.1318	52.6009	55.9441	51.0403	57.3557	5909.61	5302.36	5308.49	5142.11	5064.74	4534.43
YDR170C	135.57	77.792	108.517	114.179	107.548	112.803	3671.41	3562.74	3649.93	3622.74	3732.6	3645.56
YDR190C	164.17	138.665	150.551	156.27	134.525	146.871	11620.6	12025.1	11823.3	11420.6	11254.8	11034.2
YDR194C	159.03	152.055	113.322	122.756	119.274	113.284	10293.7	9531	10171.5	9452.93	7940.56	10116.1
YDR211W	96.58	70.5904	75.2572	71.3438	68.1267	79.4723	33849.2	32607.8	31947.4	31834.4	31380.4	31288.9
YDR214W	147.13	135.709	109.497	88.1551	97.6224	147.16	13939.2	14596.2	14230.9	12887	12996.8	11320.3
YDR233C	656.78	474.585	553.319	567.26	501.043	583.506	37104.8	38112.8	37558.7	36835.9	38209.3	37723.1
YDR234W	196.93	53.6925	263.83	223.783	208.089	179.855	7351.96	6967.21	7526.39	7234.52	7317.77	8141.79
YDR264C	109.9	141.953	85.3018	97.7481	108.031	116.093	4071.95	3998.09	4235.87	3907.1	3968.78	3773.76
YDR292C	63.9	52.4788	50.656	43.6301	48.6352	43.9664	1997.65	1964.32	1878.26	2034.88	1776.16	1842.81
YDR299W	102.57	42.3632	69.9955	72.1323	57.0266	70.7869	15422.4	15719.1	14554	13268.6	13035.8	12645.6
YDR300C	83.05	49.1298	68.9403	64.4525	66.7024	70.5737	10429.6	10252.7	10101.4	9644.62	9163.15	8838.55
YDR303C	58.93	43.5175	48.3456	47.2645	44.6595	42.8635	1753.19	1883.17	1953.23	1713.19	1663.9	1695.13
YDR345C	2167.22	731.842	1612.77	1733.95	1769.62	1651.98	37205.7	32665.9	32537.2	36764.5	34498.5	34734.4
YDR346C	245.18	100.767	147.022	169.993	153.822	179.37	45224.7	44333.5	42569	39390.5	38922.1	35696.8
YDR361C	129.75	66.1202	94.9241	89.3501	109.617	117.32	4590.28	4610.57	4549.81	4445.35	4234.06	4385.02
YDR365C	150.77	74.7019	92.7099	104.154	101.781	106.714	655.803	638.829	631.831	589.177	618.362	663.916
YDR395W	113.02	69.8523	83.7361	89.3817	87.3926	98.8389	16290.4	17126	17624.7	16079.1	16365.8	16098.8
YDR399W	434.02	137.567	171.713	182.992	342.456	367.764	36501.1	36790.6	35251	33393.7	32729.5	32238.8
YDR408C	111.47	67.2083	87.2791	77.2888	103.969	112.744	3910.19	3937.04	3488.47	3669.09	3641.86	3149.02
YDR412W	74.52	35.6368	56.5033	54.1695	46.6763	53.7885	2948.57	2797.38	3183.45	3054.66	2872.32	2743.36
YDR449C	102.22	55.9099	64.5356	69.2809	71.1418	68.8844	7523.61	8891.21	6716.5	7643.84	7079.04	5875.35
YDR454C	285.55	131.139	294.385	263.286	214.565	242.728	20507.3	19502.3	19442.3	19937	19598.2	18936.4
YDR457W	109.98	102.988	87.2522	84.6265	80.789	87.2135	357.977	372.252	340.117	405.858	346.837	352.659
YDR465C	93.52	31.1013	54.3815	49.6374	55.2614	67.9518	1603.79	1408.65	1498.4	1351.25	1340.11	1175.51
YDR481C	104.57	49.0574	54.2791	96.7453	117.802	69.6823	3060.23	2481.68	2838.34	2744.51	2830.26	2632.12
YDR483W	213.73	178.648	251.014	266.142	257.056	237.524	13025.3	11817.4	12183.4	12799.3	13137	13807.5
YDR493W	32.08	37.2487	58.6352	48.0236	59.3269	51.5693	279.403	342.287	311.344	280.419	237.586	227.19
YDR500C	1823.67	993.026	2405.64	2043.78	2186.79	3893.48	19673.2	19067.1	17616.4	16278.2	16875.3	15017
YDR519W	134.17	84.9397	161.829	125.294	104.565	140.188	5402.82	5554.14	5705.71	5812.13	5798.71	5490.55
YDR527W	97.38	66.8706	66.1045	70.7412	80.8866	71.3257	688.352	794.058	1041.72	775.912	808.292	569.557
YEL001C	259.62	159.693	267.265	309.717	253.11	244.736	7108.89	7283.03	7553.31	7812.02	7860.29	8045.03
YEL003W	182.07	121.099	210.385	114.403	101.901	126.62	1655.89	1679.17	1708.43	1649.83	1680.74	1601.31
YEL015W	74.98	69.7063	65.9829	69.2574	55.4303	64.3675	2343.07	2537.31	2578.42	2557.31	2482.59	2262.85
YEL031W	217.83	168.432	170.121	205.961	180.841	223.964	1872.93	1847.34	1896.84	1905.53	1857.69	1796.82
YEL032W	93.18	80.6252	74.3301	84.8082	99.9927	100.756	35100	33035	32167.7	29135.5	32527	30077.4
YEL042W	135.58	51.2998	106.418	127.738	120.811	146.685	8681.52	7168.8	8038.49	7757.68	7667.19	7335.64
YEL046C	488.37	333.244	598.109	736.2	654.059	747.141	106018	101012	102995	103141	100876	97264.4
YEL054C	1080.4	748.848	1153.13	1058.48	1212.44	1037.94	68483.8	65425.5	61100.8	61771	61965.2	63500.5
YER002W	150.67	76.7986	87.7249	87.6494	77.802	67.5626	2864.13	2642.71	2728.77	2627.07	2466.52	2436.46
YER006W	191.7	58.7957	125	141.985	115.106	144.571	7133.08	6982.45	6620.15	6458.86	6291.73	6045.35
YER007C-A	129.32	75.1814	118.379	80.9259	81.6192	96.128	4215.13	4065.19	4087.95	4274.99	3961.81	3888.66
YER023W	279.32	162.637	306.814	383.912	364.372	398.848	43518.9	41989.4	43300.5	41721.4	43087.2	40465.3
YER036C	362.37	214.13	285.77	336.73	350.146	353.363	17635.8	17222.8	16540.5	16607.8	16467.8	17646.7
YER042W	104.52	47.7458	59.4898	34.5097	40.991	44.566	3071.34	3040.79	2748.38	2678.63	2481.59	2190.3
YER049W	148.1	68.7665	108.195	121.873	112.272	127.709	8914	8683.44	8517.26	8011.33	7956.34	7971.91
YER073W	137.7	49.1335	129.152	143.241	126.457	107.301	23316.9	22099.5	23714.5	23255.3	23166.6	23581.3
YER082C	67.58	27.8432	42.2688	44.1024	43.5091	39.7871	5795.78	6088.11	4038.24	5043.59	4750.07	4627.55
YER086W	315.98	105.884	311.593	369	324.332	370.122	11874.8	11268	11589.5	11791.9	11697.3	12259
YER089C	54.22	36.2152	46.0236	47.8744	56.6337	54.542	12618.9	13900.8	12642.1	13122.6	13352.8	12923.3
YER091C	491.57	109.072	687.298	389.244	360.484	448.731	263886	246630	236964	245020	235516	208317
YER099C	76.38	56.2564	51.9254	66.2123	66.7503	72.2747	8121.34	8066.99	8873.4	7867.36	7914.92	7525.28
YER102W	868.92	527.166	853.237	841.821	979.034	872.325	14388.3	13553.7	13417.1	13357.4	13717.1	13828.3
YER110C	186.32	53.9921	96.1934	124.765	111.855	148.472	38301	34437.9	34886.3	34184.3	33410.7	34079.9
YER112W	104.83	92.4178	99.8084	71.3902	75.6279	76.1895	3443.37	3574.4	3212.48	3480.61	3786.26	3646.93
YER114C	38.3	29.4347	30.7289	35.3703	31.8313	33.0785	688.352	1396.99	617.685	541.334	397.829	466.287
YER120W	313.55	260.674	300.097	301.188	350.964	344.47	3497.22	3487.77	3608.79	3541.48	3560.13	3351.8
YER126C	150.32	62.3403	117.662	124.516	111.099	124.817	8655.81	7447.32	6712.63	6203.78	5947.94	6554.1
YER127W	89.15	52.4262	62.141	70.4704	63.3774	65.8811	1431.41	1799.8	1855.75	2147.5	1728.5	2343.9
YER131W	565.98	284.435	784.509	470.174	518.341	626.21	503125	502289	437211	378433	339185	302936
YER151C	86.73	87.0107	79.3749	76.0716	68.0203	63.5653	2205.35	2142.62	2196.06	2186.18	2317.73	2141.48
YER155C	155.58	126.634	112.385	121.992	111.378	128.34	1232.71	1221.8	1315.66	1402.85	1340	1304.85
YER156C	103.27	44.3673	123.379	110.878	93.9089	110.998	6081.63	5672.54	5672.13	5864.06	5627.53	5861.46
YER159C	121.02	98.4176	147.06	103.719	109.084	73.2427	5127.44	4706.03	4846.95	4741.54	5087.7	4984.25
YER164W	48.65	35.6257	38.1749	40.2297	36.4189	37.7925	1616.86	1783.63	1726	1724.25	1652.86	1562.67
YFL004W	96.17	44.8574	52.2154	67.914	57.4748	51.171	2914.87	2887.66	2730.66	2663.02	2663.24	2457.84
YFL007W	83.83	128.021	76.4344	59.7695	60.3666	69.0044	2595.3	2817.31	2747.42	2852.12	2621.57	2324.71
YFL008W	42.8	37.4532	50.812	41.0712	38.9172	36.937	5705.21	5825.46	9336.29	4446.04	9851.41	5772.16
YFL045C	529.52	256.061	606.31	582.824	510.204	584.568	3497.22	3182.41	3220.76	3314.39	3329.05	3379.91
YFL047W	63.22	73.0973	66.7847	64.5114	65.4456	75.2081	1746.07	1500.27	1786.72	1930.63	1386.05	1728.33
YFL048C	84.3	109.349	105.487	98.213	78.5197	116.752	2903.61	2537.19	2589.76	2680.66	2781.12	2790.47
YFR002W	71	67.2567	55.9346	61.2648	54.3087	50.7472	15545.5	19757.6	18887.4	16223.3	16680.1	15242.7
YGL008C	2474.6	1352.43	2303.78	3299.9	3154.24	3161.2	1.25572e+06	1.2136e+06	1.1022e+06	1.13916e+06	1.17699e+06	1.28365e+06
YGL009C	112.67	84.456	83.4484	81.2783	76.8623	107.257	96329.5	99994.4	97846	98028	95231.5	94691.3
YGL011C	187.45	325.988	167.445	146.995	126.014	138.77	15207.6	15726.3	16551.1	15952.7	15864.1	14539.4
YGL014W	94.12	53.7082	79.5715	87.0749	69.5861	78.2463	720.517	754.795	654.184	721.187	617.496	642.384
YGL019W	107.37	102.975	110.567	106.13	98.5094	89.0944	8121.34	8309.41	8269.39	7391.86	7321.9	7759.82
YGL020C	103.62	88.1626	105.899	103.932	112.639	108.624	2253.49	2198.1	2135.16	2097.68	2058.71	2036.51
YGL022W	268.95	196.434	278.014	302.833	288.373	294.192	3004.53	2867.35	3104.72	3104.65	3011.68	2834.8
YGL027C	82.58	60.9589	88.4336	85.5043	79.0036	79.6822	2835.84	2789.64	3032.08	3191.33	2660.6	3416.61
YGL030W	3232.08	1863.29	4911.14	4441.15	4557.81	3995.31	59318.7	55076.6	50024.4	49377.1	49031.6	51482.9
YGL031C	550.97	404.315	551.582	602.489	646.408	701.916	247378	237917	241003	236350	240713	229301
YGL039W	90.07	50.9692	59.2655	63.3116	66.1212	66.3816	2343.07	2303.39	2216.89	2122.74	2113.82	1847.01
YGL049C	66.93	60.1447	62.7719	58.3287	52.4727	54.5658	3389.32	3486.18	3569.65	3748.09	3765.75	3766.65
YGL050W	75.12	65.3956	71.8001	69.2562	80.3684	69.4141	3389.32	2764.05	3205.91	3359.97	3633.65	3054.67
YGL067W	41.37	39.8411	31.1747	31.9055	33.5267	40.6902	845.819	1055.75	1025.74	897.921	932.49	886.688
YGL076C	1722.98	998.011	1780.35	1777.43	1838.76	1694.8	101441	110840	102371	95532.2	96433.3	95404.6
YGL078C	214.63	57.4593	134.489	127.346	129.523	136.492	38934.2	38439.5	37041.1	36687.1	36125.1	36721.7
YGL092W	88.08	53.4309	68.5656	68.001	65.0232	80.6547	4632.57	4622.2	4726.94	4083.14	4433.87	4123.77
YGL099W	82.65	40.3986	53.9905	62.1529	54.5108	63.1213	19425.1	19393.3	17905	18330.5	17416.9	17912.1
YGL101W	103.58	62.8908	106.627	96.8775	98.9461	86.4662	1498.3	1670.08	1911.29	1547.87	1907.82	1847.26
YGL111W	71.1	33.4492	44.1003	45.5538	41.1129	52.7917	2744.84	2725.98	2805.81	2602.89	2492.71	2347.57
YGL115W	118.03	114.228	118.119	133.77	154.588	133.761	11676.9	9191.14	10545.7	10848.7	10715	10011.7
YGL120C	172.87	72.4119	119.849	130.162	117.356	131.196	16910	16391.3	15531.2	16763.2	16363	15770.2
YGL122C	164.47	208.095	123.817	114.375	120.486	157.699	9671.7	10418.8	9554.69	9190.06	8388.64	8104.11
YGL133W	53.77	66.7024	55.2888	51.7372	52.0595	50.0626	2606.88	1699.96	2020	1208.35	2188.46	1553.02
YGL147C	2312.02	1115.64	2537.2	2358.6	2322.92	2554.6	52359.5	46243.9	48473.2	50175.5	50141.8	50387.9
YGL148W	273.77	104.161	334.041	321.638	377.355	301.391	2313.31	2267.25	2126.15	2110.29	2166.05	2267.89
YGL150C	71	56.8209	55.1326	54.7563	61.9622	58.3329	6278.44	6770.93	9976.76	10104.7	11611.7	8382.52
YGL164C	49.1	52.0633	45.1334	38.6966	42.1457	36.545	3671.41	4359.22	3079.57	3881.66	3329.45	4343.85
YGL169W	52.75	31.6207	31.1213	34.6659	38.8694	35.1831	538.41	470.731	484.811	459.611	451.537	425.004
YGL173C	156.85	142.921	124.407	111.296	107.768	114.361	11676.9	11617.6	12255.1	11840	11719.5	11026.7
YGL195W	201.23	165.87	177.369	186.663	163.494	170.594	7327.54	6869.89	7388.66	7549.51	7408.49	7141.36
YGL200C	288.23	238.51	351.483	372.003	407.917	388.605	26817.4	27485.2	28253.7	27710.7	27568.5	26818.4
YGL201C	50.05	41.765	38.7594	40.705	43.4046	38.6853	13435.7	11213.1	9155.89	8445.39	10215.8	12395
YGL232W	114.05	100.042	113.744	97.9568	86.5396	89.8951	2630	2774.98	2657.84	2466.82	2576.98	2477.94
YGL234W	316.3	166.125	260.305	208.401	209.972	265.912	35800.7	34094	36461.2	35235.9	33796.6	30848.8
YGR001C	152.12	97.9407	157.512	131.062	140.383	150.981	3060.23	2777.67	2936.34	2865.6	2991.52	2775.56
YGR005C	83.13	77.9574	82.2052	68.1974	67.8567	66.5178	519.682	495.694	540.6	570.246	554.875	530.066
YGR017W	143.83	116.043	177.702	147.825	135.57	116.624	2835.84	3080.22	2969.15	2842.86	2635.16	2555.35
YGR020C	336.07	229.423	214.689	230.747	235.819	192.82	4051.62	4336.31	3847.33	3563.39	3892.75	4309.43
YGR024C	99.82	74.2446	70.9374	69.0892	85.7799	94.833	1169.43	1147.44	1300.87	1242.13	1278.98	1286.73
YGR034W	2404.15	1483.72	2653.06	2508.25	2493.8	2447.66	33236.3	34533	32625.6	32451.4	32351.1	32478.2
YGR061C	280.33	98.3068	157.068	154.275	159.237	200.778	40769.8	37522	37847.4	36596.6	35332	32878.1
YGR082W	211.25	154.389	223.21	213.572	285.697	221.197	5682.63	5435.29	5521.68	5570.9	5466.26	6191.33
YGR090W	98.32	67.1601	64.9714	80.7266	71.7012	70.8831	3258.69	3078.98	3385.95	3316.74	3315.2	3234.16
YGR094W	477.08	244.272	374.712	431.593	413.056	429.812	358	339.228	337.239	344.06	350.618	364.74
YGR116W	154.5	127.713	159.922	134.453	129.277	130.882	8888.08	8871.12	9262.48	9040.97	9110.2	9002.75
YGR119C	82.93	81.7984	74.2787	73.3421	70.8635	65.5136	9305.27	9229.5	9359.93	9817.07	9348	8933.76
YGR123C	80.03	30.9775	51.6675	54.3735	49.8967	56.266	6988.31	6573.96	6437.75	6624.55	6432.56	6497.7
YGR128C	85.78	40.1925	50.1442	52.7426	51.7213	57.9279	16761.5	17458.7	16413.8	15687.9	15804.1	14627.5
YGR148C	538.72	373.422	535.877	467.929	508.317	533.536	36883.1	35879.8	34835.8	36409.9	36386	35677.6
YGR157W	192.8	131.655	199.071	162.542	160.011	231.792	1809.78	1818.57	1857.22	1868.27	1775.86	1774.87
YGR159C	625.67	125.706	362.647	440.232	379.805	488.645	77437.2	73538.8	68345.5	65278.9	63681.9	60658.3
YGR162W	219.42	96.5243	195.906	183.163	146.003	179.682	9755.8	10233.9	9747.5	9240.09	8823.24	8563.97
YGR173W	79.97	56.9195	63.6698	66.7474	70.6234	81.4676	6197.16	6570.84	5961.14	6019.8	5831.27	5415.16
YGR175C	307.18	175.319	276.963	297.917	298.18	330.348	65383.6	62476.2	58865.1	55104.3	54150.8	53673.8
YGR178C	121.33	117.024	102.29	95.3326	92.4912	104.517	2869.78	2870.56	2880.22	2810.41	2694.88	2602.41
YGR185C	386.18	307.579	441.731	324.078	348.602	298.574	2710.5	2792.2	2620.14	2734.89	2783.51	2965.85
YGR186W	97.6	129.286	90.3024	90.4492	89.0415	77.1308	1923.06	1886.19	1647.34	1774.64	1682.35	1724.91
YGR187C	98.6	61.2075	64.2063	62.4266	52.3757	58.9261	20843.9	18491.6	20332.8	18474.8	17735.3	16323.5
YGR200C	79.17	41.6223	56.0204	62.2134	60.8855	65.3493	6093.16	6186.98	6285.75	5876.97	5951.14	5992.47
YGR204W	355.13	255.819	374.541	344.021	361.955	368.267	35641.2	35658.2	34160.8	34130.4	33355.7	32375.2
YGR208W	96.1	68.1512	88.8049	61.6708	71.8642	85.0599	13850	13286.6	12389.2	12718.2	12594.1	12657.5
YGR210C	100.9	53.968	75.2639	80.5044	86.4628	81.5575	11592.4	11440.9	11086.6	11816.9	12258.8	12310.8
YGR211W	122.25	60.4138	70.5711	71.529	71.6828	106.436	39859	35739.6	36612.6	36244.5	33027.1	30533.8
YGR229C	114	91.7257	152.475	138.385	122.499	159.339	5682.63	5710.9	5323.33	5519.26	4949.76	5817.19
YGR233C	31.73	14.2857	22.7972	27.7232	25.0781	23.9535	2926.11	2659.46	2791.34	2730.73	2802.83	2561.54
YGR234W	314.93	132.731	198.006	161.607	155.246	201.804	12967	12262.2	11745.1	11263.1	10821.2	9912.46
YGR245C	101.15	24.8112	48.7501	60.679	50.2905	63.8591	3637.91	3128.71	3213.25	3239.15	2954.04	3116.47
YGR264C	227.8	114.077	186.271	181.499	166.338	194.787	85016.2	85671.9	84980.3	82285.9	81150.4	77231.2
YGR271C-A	19	10.0869	14.1604	13.0758	10.8745	11.5954	2835.84	2721.71	2670.26	2611.24	2426.48	2316.6
YGR275W	88.68	88.6979	77.4953	61.7282	52.8265	58.4038	1551.27	1771.92	1595.85	1485.18	1508.46	1437.65
YGR280C	223.93	71.6351	123.651	144.068	141.069	136.834	3850.06	3821.45	3547.28	3260.37	3275.29	3199.77
YGR285C	529.05	269.383	447.179	494.141	490.521	457.959	86409	85615.1	82249.5	80639.8	78770.4	77389.3
YHL001W	607.08	404.194	771.511	824.951	742.047	774.589	35104.5	35550.2	35690.3	34824	36183.6	34113.2
YHL007C	95.63	83.0395	86.8325	85.9398	75.3839	85.8071	258.916	256.848	221.953	253.734	210.63	182.563
YHL039W	54.57	27.16	36.957	37.6628	38.4621	41.1649	5171.2	4149.07	8450.79	4998.35	6004.82	4666.39
YHR010W	1322.55	816.045	1274.89	1730.8	1191.24	1125.07	7376.41	7005.74	7009.31	6956.65	6877.47	6678.93
YHR013C	86.07	65.5464	74.8389	76.7418	89.2501	88.7968	3313.28	3405.84	3466.91	3224.99	3223.75	3124.68
YHR023W	48.72	37.991	44.3362	53.6355	43.3839	42.3765	2144.79	2343.23	2330.04	2361.51	2285.69	2043.42
YHR025W	296.75	169.012	257.336	240.242	276.536	296.492	92610.4	92863.7	91924.7	92503.3	90922.1	85443.6
YHR039C	105.58	71.057	67.4325	71.8438	82.5557	87.4969	2502.2	2566.23	2458.45	2369.26	2435.72	2493.82
YHR042W	165.22	88.5189	143.651	133.166	141.729	182.917	46625.6	44775.2	43934.3	42651.9	40661	39193.8
YHR052W	169.77	76.5935	116.067	117.436	95.8675	136.342	45869.7	46548.6	45266.6	42005.9	42069.6	40897.4
YHR063C	95.82	88.7068	77.2874	71.5887	82.2405	75.1042	2595.3	2598.39	2659.92	2544.81	2599.15	2546.79
YHR066W	92.33	41.002	60.3816	58.1692	46.0445	68.2946	8146.55	8198.2	7433.41	6753.92	7046.22	6134.52
YHR068W	359.83	201.563	302.211	318.376	346.501	319.329	7597.55	7570.5	7503.52	7450.28	7345.64	7163.01
YHR084W	166.97	115.836	145.375	149.772	149.959	163.474	1923.06	1962.82	2030.73	1972.09	1947.81	2378.73
YHR088W	70.03	30.4638	44.895	42.8384	40.2164	41.2014	783.799	730.277	679.719	651.847	634.635	599.397
YHR089C	593.25	214.571	405.049	445.242	485.94	547.408	5727.81	5232.89	4746.14	4988.67	5083.48	5585.28
YHR098C	111.3	85.133	117.991	106.633	101.007	109.302	12187.9	11009.8	13758.5	11986.8	11292.2	12280.1
YHR107C	112.9	102.447	108.133	116.272	99.8225	106	1169.43	1170.2	1180.82	1196.34	1149.08	1191.06
YHR108W	143.85	126.717	142.619	136.82	134.806	124.353	2265.49	2287.62	2460.12	2496.14	2535.21	2421.64
YHR117W	59.92	42.0713	57.2713	59.7001	57.8331	64.0919	4112.7	3820.92	4086.99	4224.48	4096.72	4283.19
YHR121W	151.23	132.135	155.972	169.062	140.685	163.01	8323.7	8364.12	8462.82	9162.52	9534.79	9807.9
YHR132C	96.67	114.815	119.091	108.472	116.447	114.141	468.395	908.181	737.697	1297.9	1446.62	485.801
YHR135C	102.23	117.551	95.7941	89.4632	86.7547	97.0453	1629.89	1584.64	1761.29	1698.25	1822.46	1692.05
YHR143W-A	319.97	204.942	352.937	354.068	358.05	379.89	906.714	864.648	806.707	829.909	839.34	793.161
YHR158C	54.8	59.5395	63.9402	59.0149	54.3438	58.2078	1350.09	997.466	954.352	955.555	949.784	851.744
YHR163W	143.83	110.128	117.659	133.718	135.636	125.952	3421.78	2962.33	3723.65	3785.56	2555.09	3098.83
YHR170W	180.52	65.3582	95.0597	114.233	112.259	144.444	11894.9	11804.3	12122.9	11091.2	11506.8	10651.8
YHR179W	730.42	478.034	358.382	382.507	400.275	433.809	15131.2	15284	14718.4	14509.2	13895.2	12579.8
YHR188C	79.97	62.3769	71.4586	80.2856	71.2435	78.4019	1681.78	1580.34	1583.49	1600.43	1641.69	1693.36
YHR196W	133	83.3498	74.0618	92.6916	72.7611	70.4091	20005.6	19796.5	17456.7	20495.2	19513.7	20968.6
YHR197W	66.85	26.608	33.5213	39.0061	36.1256	41.0427	7820.7	6389.84	5674.35	6042.27	5585.43	6197.64
YHR201C	78.62	94.6055	63.6973	60.5885	60.0856	64.0118	3170.88	2836.86	3160.03	2941.19	2944.01	2861.24
YHR205W	67.9	47.3941	48.616	57.7943	49.1275	48.8239	3850.06	3881.27	3856.98	3671.39	3645.86	3718.09
YHR208W	244.03	149.847	246.1	237.949	201.285	235.649	87301.8	86750.5	86559.1	92420.6	88273.2	91900.7
YHR215W	11.5	1.02489	2.13962	7.45815	6.13222	3.48601	3291.47	2883.34	2098.37	2120.09	2105.88	1678.74
YHR216W	284.48	177.057	193.737	221.538	224.35	251.169	7870.56	8799.71	7255.49	7594.2	7267.81	8364.13
YIL009W	101.02	47.1267	65.7504	73.9784	73.8782	81.5931	6441.96	6803.38	6097.19	6653.35	6388.32	6568.54
YIL015W	16	5.43256	9.44338	18.5272	15.8107	17.6713	672.127	602.53	648.899	589.909	678.924	664.78
YIL035C	149.12	168.314	111.948	112.286	114.408	94.9141	7181.55	8059.12	7731.79	7418.81	7503.99	6958.41
YIL039W	78.57	49.6996	67.9181	69.3776	65.2233	68.6098	1069.23	1264.85	983.752	1058.54	1082.91	1134.38
YIL044C	81.38	114.753	90.5874	78.9013	81.2933	71.9361	5347.39	5395.8	5725.09	5622.44	5610.24	5649.79
YIL051C	416.63	296.621	419.188	367.12	360.539	353.118	168102	166192	153825	150366	147683	142069
YIL052C	1912.13	1542.22	2095.62	2127.12	1887.83	1989.31	21012.8	21351.7	17759.3	18267.2	18492	19861.3
YIL069C	1018.5	591.629	911.962	763	1086.47	762.764	6162.43	5896.92	5553.07	5700.63	5725.4	5892.59
YIL094C	834.83	465.701	1582.99	966.168	1006.87	903.297	19079.4	18161.4	19489.2	20262.6	20215.6	18508.9
YIL115C	89.37	67.2955	73.9954	78.7901	69.8341	80.6474	1225.72	1325.62	1306.03	1124.39	1063.24	1087.13
YIL118W	134.82	100.087	150.334	127.5	157.629	150.957	5909.61	5719.06	6226.66	6062.04	5918.9	6377.15
YIL126W	90.52	90.0464	98.9555	90.0541	73.8834	84.4814	1985.27	1983.88	2966.93	3162.49	3326.21	3016.92
YIL130W	69.03	50.1111	49.6987	52.9714	50.6202	47.4921	395.628	577.388	499.379	438.71	475.931	416.337
YIL133C	1105.13	561.569	1152.77	1222.01	1147.69	1309.77	43307.1	42115.6	41773.3	41213.2	40911.4	40505.4
YIL145C	86.88	32.0976	30.156	34.0951	43.8264	42.5718	2402.32	1862.82	2022.79	2111.85	1804.31	1901.99
YIR004W	63.03	59.2601	61.3424	63.9965	49.65	48.5402	8965.92	8979.25	9380.75	8880.98	8690.27	8893.85
YIR026C	66.68	23.3429	44.6301	44.9179	45.8334	59.1226	7572.88	7657.1	6415.5	7486.76	6073.48	5591.04
YJL001W	320.62	568.518	399.198	272.51	420.964	346.364	7254.43	6670.98	6319.48	5387.06	5221.63	5407.33
YJL002C	185.25	184.318	143.85	158.014	155.278	178.592	11889	10945.5	12059.4	12117.9	12370.9	11229.3
YJL033W	105.88	29.6155	56.4593	66.9282	62.4098	71.7108	7895.53	6362.63	8009.49	6112.55	7145.14	7007.98
YJL034W	369	359.094	321.528	282.538	210.984	276.443	336942	331735	324340	315579	308505	287558
YJL041W	109.03	96.2211	113.3	105.427	90.2096	113.897	2396.41	2219.39	2390.01	2347.48	2364.46	2161.79
YJL050W	122.1	36.0896	68.7093	78.8861	75.8479	97.9867	12503.5	12116.7	11663.7	11567.6	10792.8	10475.8
YJL061W	47.4	39.8239	41.7876	40.696	38.5042	38.6661	9470.96	12959.2	17225.3	13327	17742.8	11511.6
YJL074C	34.8	16.1451	37.7912	29.7103	29.2047	28.3334	2664.58	3244.29	1842.78	2471.8	2833.82	2692.8
YJL076W	99	71.7709	94.5515	99.157	76.554	84.8838	1590.7	1618.8	1732.15	1819.62	1807.66	1729.45
YJL087C	33.45	27.0281	28.7039	27.4677	27.3649	27.6165	3111.27	2610.34	3141.41	3050.84	2858.7	2821.4
YJL109C	148.88	40.2849	73.4747	83.9216	69.1541	90.4349	18231.7	17284.1	17623	17774.1	17115.4	16370.3
YJL115W	116.98	85.0991	168.96	110.166	98.4671	85.2001	6231.95	6841.65	6492.2	7414.99	7222.96	6949.28
YJL121C	109.6	63.77	106.328	117.211	116.179	171.241	3313.28	3241.13	2775.21	2855.58	2816.72	3001.53
YJL123C	99.62	127.938	119.747	93.7114	89.054	87.2329	2156.94	1989.25	2404.43	2365.24	2243.51	2116.01
YJL130C	238.4	82.3164	343.52	414.241	176.275	173.566	11006.3	10518.9	10847	12648.3	12724.2	11316.5
YJL136C	1021.6	1084.11	1385.01	1407.72	1866.21	2107.96	15299.6	14566.7	14234.9	14502.9	14706.2	14669.6
YJL145W	81.15	63.8175	68.9549	60.9786	66.5988	67.1166	6535.98	6535.75	6357.19	6747.51	6654.22	6573.18
YJL148W	247.02	108.52	135.627	170.327	132.553	140.208	3362.21	3388.32	3020.39	3070.66	3181.41	3075.53
YJL173C	134.7	99.522	156.625	147.357	179.425	142.425	4276.97	4016.24	4281.86	4388.7	4268.79	4595.82
YJL176C	49.83	41.5102	48.0315	47.3084	43.0959	45.6915	3148.83	3071.33	3437.79	2923.63	3229.59	3063.41
YJL177W	763.57	515.461	775.737	778.141	683.283	758.99	21097.5	20673.5	20608.2	20532.4	19640.6	18661.1
YJL183W	65.98	35.0637	55.1635	65.8383	59.3897	66.9123	3475.7	3830.29	3529.42	3370.14	3659.26	3125.96
YJL186W	120.67	72.2138	116.218	108.944	126.909	138.618	11396	8632.84	8180.09	8567.77	8126.08	7055.36
YJL191W	286.2	146.63	240.155	267.173	312.916	260.761	3367.64	3350.12	2876.13	2862.03	2836.37	3067.49
YJL200C	289.12	73.9367	572.344	366.495	312.866	308.614	4674.98	4695.37	5106.67	5361.51	5319.81	5599.52
YJL217W	111.97	54.4495	68.3096	63.2	100.365	64.1856	720.517	658.815	640.84	552.013	569.785	461.899
YJR003C	68.02	42.6619	48.7137	50.217	48.8524	53.881	3280.56	3131.12	2844.68	2787.81	3038.15	2348.72
YJR007W	285.35	199.729	224.798	217.003	204.212	216.899	17077.8	16191.3	17196.5	17405	17257.6	17100.4
YJR017C	124.08	92.0145	137.573	125.612	131.897	103.468	4401.47	4549.36	4170.35	4217.28	4470.44	4602.78
YJR032W	63.85	40.1263	52.822	46.7146	42.0162	49.2941	3225.83	2610.84	2828.99	2733.6	2321.98	2553.66
YJR048W	178.93	52.2336	214.57	186.083	186.464	169.162	7327.54	7314.57	7506.37	6418.21	6587.43	5495.18
YJR051W	62.65	47.113	51.4457	53.4298	52.49	65.5678	432.397	439.57	432.055	444.908	460.504	395.718
YJR063W	136.5	73.1817	90.8613	121.373	120.688	149.199	8450.96	8395.2	7429.78	7551.57	7160.1	7459.6
YJR068W	61.38	59.6353	59.6697	54.0824	60.9695	55.7731	4607.52	4141.82	4302.05	4358.39	3904.63	4751.5
YJR069C	100.47	63.3347	88.759	92.7315	81.3173	118.952	3486.46	3455.8	3292.53	3204.44	3128.09	3001.3
YJR070C	182.4	35.4838	115.644	118.809	131.793	160.101	39859	37331	36392.2	35908.9	34909.8	36218
YJR072C	114.77	82.0252	105.387	100.642	106.174	109.372	15207.6	16769	16535.7	15137.2	13905	12868.2
YJR075W	143.58	94.3625	134.035	135.306	142.889	138.459	7157.3	6059.41	7105.46	6904.21	7434.08	7875.93
YJR105W	361.72	210.504	361.634	428.363	429.315	365.331	22172.8	21492.5	19507.8	19736.3	19911.6	20161.8
YJR131W	28.62	23.4746	29.7818	27.6791	25.6674	28.9341	8260.29	6680.04	7684.58	7843.49	8072.24	6927.59
YJR139C	439.02	309.371	416.481	421.4	343.327	416.682	48916.4	47054.3	46320	46836.5	50036.1	51086.8
YJR143C	172.98	76.2569	162.398	176.427	170.786	212.966	1267.52	1091.84	1157.07	1184.8	1307.23	1355.84
YJR145C	1328.67	927.612	1411.3	1374.07	1407.44	1193.52	572.557	556.999	509.114	509.004	503.316	534.861
YKL006W	1804.13	1096.76	1969.78	2098.47	2178.9	2078.26	45332	44179	43748.5	43005.6	43130.4	44392.2
YKL008C	216.08	121.714	193.588	222.157	251.933	225.585	2835.84	2697.09	2763.73	2989.98	2977.44	3095.41
YKL009W	374.02	127.545	228.208	277.734	270.921	310.327	18167	17661.1	15500.4	15435.3	14765.6	15237.4
YKL014C	86.72	34.3517	42.9212	51.8213	42.7736	50.8215	5886.79	6148.35	5864.3	5572.7	5444.2	5051.47
YKL024C	97.68	55.7052	81.9304	88.3792	100.222	94.8548	1498.3	1437.23	1430.49	1468.35	1471.48	1453.9
YKL027W	60.62	45.5645	54.9429	54.1411	48.0273	56.9088	1169.43	1351.05	1243.41	1191.54	1085.21	1018.14
YKL029C	115.68	17.6841	80.0247	108.163	76.6668	78.0115	10456.8	10104.6	9913.27	10108.9	9661.77	9306.3
YKL056C	2360.35	1339.84	2447.65	2552.96	2388.01	3211.1	27826.6	27840.2	25026.6	24327.4	23632.3	22229.3
YKL059C	34.05	52.0769	35.1656	37.0337	38.3997	35.8688	1126.76	1959.8	1164.42	1285.9	450.567	1330.06
YKL060C	7960.95	7677.49	9539.54	9651.16	10183.3	9301.56	1.01822e+06	1.03372e+06	966283	997061	993916	1.1327e+06
YKL081W	2100.3	1306.29	2267.88	2452.67	1928.42	2683.2	102130	98204.6	97515.8	98862.9	98951.3	99439.9
YKL120W	75.93	46.6597	50.3688	40.4738	46.3212	53.8498	5347.39	4411.1	4708.28	4331.18	4101.38	3704.12
YKL122C	306.42	282.395	337.936	214.961	273.722	246.434	3400.15	3449.12	3601.45	3599.99	3704.73	3719.23
YKL127W	97.52	74.2861	84.9945	71.354	67.8584	82.7878	9822.55	10162.4	10257.3	9778.55	9629.22	8536.7
YKL144C	50.13	23.9675	35.9276	39.761	35.6173	49.6069	752.326	921.024	889.243	588.534	423.325	772.274
YKL154W	89.78	76.7201	95.6023	90.9694	67.5202	89.4509	8247.63	8022.57	8479.14	8077.17	8386.11	7754.07
YKL173W	39.67	34.7279	29.7113	30.2804	33.278	29.1428	299.519	277.192	292.996	296.775	318.158	267.487
YKL179C	53.03	77.0464	50.7272	52.4698	38.8397	43.8301	2653.07	2805.29	2944.55	2915.05	3033.94	2746.4
YKL181W	270.28	106.157	173.61	173.903	200.873	227.425	11676.9	11305.5	11161.8	10929.9	10625.1	10027.3
YKL182W	553.3	383.986	497.341	605.62	546.838	568.616	91807.9	88081.3	85654.7	85991.3	86713.5	83921.8
YKL191W	65.03	20.8662	43.5648	50.5732	51.063	73.7623	3486.46	3675.44	3077.03	2890.71	2783.71	2740.14
YKL192C	683.57	696.667	827.786	636.034	706.361	751.481	60512.3	66581.1	59949	63730.4	64719.3	67589.8
YKL204W	101.73	106.894	81.1547	75.8729	76.0153	67.1843	3236.8	3202.23	3486.12	3383.8	3485.44	3232.51
YKL212W	146.5	132.225	125.459	119.273	127.832	128.269	48039.7	48299.3	50448.3	50644.6	50745.8	48187.2
YKL214C	42.17	41.5788	45.9383	33.7742	42.9144	45.1764	1308.97	1501.71	1115.22	1359.61	1174.56	1204.56
YKR024C	72.15	32.1366	38.4314	42.5172	44.0287	50.7662	1458.26	933.757	1120.57	1327.81	588.814	1121.87
YKR025W	85.58	58.0342	70.6665	65.9286	71.4447	75.9678	1590.7	1502.37	1315.75	1284.72	1358.95	1161.73
YKR026C	101.28	69.2124	65.745	69.6704	69.755	72.5872	8965.92	7755.11	9019.68	8978.1	8750.87	8799.89
YKR043C	203.63	122.007	222.779	198.764	228.39	233.703	11452	10735.3	11199.6	11373.9	11316.5	10976.3
YKR059W	628.97	478.935	628.86	592.253	650.491	643.11	106018	101614	99927.9	100753	99245.1	100267
YKR071C	117.27	127.11	111.356	108.569	82.3881	87.268	1047.45	1063.45	1009.92	994.566	975.591	1000.73
YKR072C	116.18	107.913	93.9829	97.1892	93.0496	71.1832	3750.49	3772.33	3779.83	3491.41	3200.01	3493.47
YKR074W	138.37	113.078	135.89	123.567	124.7	145.506	1225.72	1260.22	1259	1218.85	1219.71	1159.87
YKR080W	206.57	223.551	165.245	170.349	162.88	167.432	16196.7	15891.6	16607.6	16381.1	16467.9	16171
YKR081C	129.12	45.3208	79.3035	86.7648	63.2811	95.4368	32362.5	29329.3	33113.7	32084.2	31494.6	28819.1
YKR082W	64.67	50.3181	51.9682	51.2552	50.9355	51.6491	3060.23	2837.16	2643.51	3460.49	3226.81	3338.42
YKR092C	219.6	51.4047	99.5653	145.258	141.872	157.015	12937.9	13106.9	14623.4	10376.9	10513.6	11323.1
YKR094C	988.97	630.376	1162.15	683.3	839.46	1198.09	28196.4	26060.7	24915.1	24612.7	24913.6	23982.9
YLL011W	68.72	35.8323	42.5626	44.2112	44.1827	39.21	6624.61	6090.35	5245.44	6305.05	5756.6	6181.3
YLL021W	79.48	54.5478	86.1561	74.3471	63.2426	61.1882	274.318	264.238	280.306	263.345	273.162	243.343
YLL034C	60.22	24.1738	39.544	42.2525	36.1173	42.7079	4485.08	4271.75	4260.13	4000.54	4147.43	4209.24
YLL045C	1734.6	1181.07	2026.45	1940.13	2049.68	2435.06	80188.9	78122.8	76243.8	75645	72924.3	75724
YLR002C	81.28	35.1529	50.1183	53.8246	49.8325	50.6414	11747.5	11004.8	10457.6	10651.4	10624.3	10881.6
YLR017W	70.25	28.5254	53.9891	54.2055	59.2847	65.0603	4824.36	4575.63	4805.3	4924.94	4769.83	4605.12
YLR022C	80.1	74.7748	64.7972	81.5347	67.9653	68.8265	5062.01	5611.61	5227.66	5477.12	5206.39	5103.28
YLR056W	276.42	113.889	234.758	219.981	248.293	372.221	36200.4	29045.6	28176.7	28036.5	27393.1	26459.7
YLR061W	1524.2	815.863	1202.55	1350.77	1696.96	1237.69	60395	55301.6	57193.5	57708.4	58915.5	61499.7
YLR068W	65.28	31.3133	42.775	39.1342	30.056	33.4499	1458.26	1195.15	1177.48	1278.79	1074.46	995.026
YLR074C	249.17	117.459	217.096	200.547	226.058	181.214	5626.32	5207.97	4957.28	4895.09	4769.4	5041.52
YLR086W	41.35	30.891	43.0612	41.7103	37.1939	37.5002	572.557	753.309	697.146	578.785	551.407	466.539
YLR089C	186.17	197.687	167.708	157.784	160.522	165.012	9956.48	10382.1	11755.4	11003	11646.9	10328.8
YLR126C	55.37	32.9329	33.9484	30.8245	34.6999	39.0401	1511.59	797.125	1119.16	1068.62	371.64	929.605
YLR129W	92.05	39.8123	64.5959	72.3926	59.4828	58.0342	9622.73	8805.6	9115.2	8586.11	8636.4	8384.51
YLR143W	48.37	42.2319	47.271	39.909	40.4032	41.3793	2265.49	2441.52	2467.05	2296.84	2224.76	1900.08
YLR172C	126.8	46.5275	85.559	81.2102	74.8404	67.2501	13479.9	13897.7	13819.7	13562.5	13217.6	12233.9
YLR175W	681.5	210.477	389.036	496.548	414.697	368.386	33648.8	31598.8	30124.1	30465.8	29793.6	29266.6
YLR179C	388.15	183.121	354.784	258.456	311.496	416.64	6231.95	6072.68	5748.66	5438.13	5341.58	5278.17
YLR192C	248.07	251.421	264.852	188.936	223.315	229.214	17876.6	17070.1	17787.3	17410.8	17400.6	16303.9
YLR196W	134.65	45.8909	82.1544	89.5713	91.1026	93.9971	43837.2	41942.2	43780.2	41671.7	44889.9	41405.6
YLR197W	1183.15	320.294	820.108	856.686	767.094	819.293	13520.5	12504.1	12570.6	12229.8	11806.7	11883.9
YLR200W	102	73.1522	76.5481	55.3957	52.1959	68.3535	783.799	800.045	790.018	762.998	762.382	699.814
YLR209C	61.6	43.7386	60.0627	70.9849	59.1864	74.8489	1629.89	1632.84	1694.43	1556.97	1672.16	1587.18
YLR212C	43.5	32.1623	43.6902	45.5874	48.6552	50.363	7202.68	6783	7320.74	7013.65	7033.76	6530.33
YLR214W	39.15	7.65909	6.83404	9.14102	9.04526	10.8137	891.589	761.453	639.29	545.162	507.231	389.002
YLR215C	34.07	36.8432	29.6094	31.9645	30.1173	32.3692	4845.82	6276.73	5238.4	4341.2	3964.92	3787.04
YLR216C	272.92	381.543	223.399	150.853	128.905	217.127	18621.4	19782.4	20219.7	19503.3	19042.1	16993.5
YLR222C	86.05	43.8716	52.6722	64.3639	55.223	57.4692	8070.99	7539.88	7936.82	7481.78	7289.11	6940.62
YLR244C	221.85	141.64	165.013	176.318	146.729	169.2	19590.4	18320.8	19209.6	18843	18390.1	17749.1
YLR249W	2255.47	1297.67	2135.19	2485.23	2511.51	2757.33	870578	799104	758035	778524	775629	812172
YLR274W	45	35.009	30.7925	34.7803	39.9554	38.9447	10330.9	11370.3	11373.5	10715.8	9711.96	9312.98
YLR285W	93.78	76.9198	93.8073	91.7085	69.9895	98.934	7278.77	7981.26	7145.31	7577.95	7211.92	8427.21
YLR291C	112.12	65.4794	86.0763	96.117	88.6926	93.1006	6652.56	6730.28	6255.94	6537.84	6104.69	6288.55
YLR301W	110.8	93.2723	124.888	135.748	144.737	125.041	15437.7	15000.3	17182.8	16737.4	15507.8	15374
YLR304C	470.9	185.66	401.541	617.371	879.47	505.274	96655	100487	98852.1	101090	117357	130641
YLR309C	56.93	68.4976	61.7321	51.1616	47.7145	45.4416	2349.01	2567.34	2481.52	2350.4	2496.74	2294.5
YLR319C	32.43	30.4621	32.9488	30.9127	28.1512	31.8019	2606.88	2318.35	2668.46	2636.54	3021.65	2508.82
YLR330W	163.83	267.649	238.656	197.522	171.481	181.769	172.148	172.61	162.963	161.338	163.782	164.942
YLR333C	434.98	275.845	470.164	443.319	542.786	368.654	162334	161715	154258	150795	151920	155426
YLR335W	108.63	69.8597	103.38	99.7669	94.4625	86.9522	2959.79	2951.23	2914	2833.68	2755.4	2802.71
YLR336C	49.73	29.1035	30.8413	33.7247	34.3785	36.1989	3060.23	2846.47	2580.34	3026.74	2665.73	3192.91
YLR347C	80.55	67.2406	62.8672	69.3289	66.9231	74.6615	51705.2	52017.3	50799	50206.7	49505.3	52732.7
YLR355C	764.05	661.422	832.571	704.661	769.306	824.695	882841	833088	867291	847012	844630	790284
YLR367W	134.68	63.477	135.959	153.517	152.032	130.867	19739.6	18583.1	18204.4	18280.5	18596.3	19153.3
YLR370C	226.13	413.468	370.141	244.595	268.456	244.658	1923.06	1754.41	2130.24	1592.08	1915.93	1685.38
YLR378C	316.78	234.85	435.775	390.655	354.931	412.142	24762.9	21455.5	23851.6	25287.3	25264.8	25930.5
YLR380W	64.4	38.9515	55.1888	57.3391	58.3012	51.0205	9596.18	10073.8	9244.63	8767.66	9715.25	9327.87
YLR384C	105.93	56.0028	90.2441	99.8701	75.7929	88.5967	10538.7	10669.2	10131.3	10037.5	9392.14	9684.08
YLR388W	139.87	72.8812	109.179	141.279	128.948	207.077	6488.92	6521.89	5654.25	6199.46	6020.45	5907.68
YLR398C	61.47	71.2915	60.3252	60.4789	54.1727	51.2118	5773.09	6182.8	6908.82	6367.63	7272.39	6153.83
YLR401C	56.97	27.1007	47.8543	44.3314	47.1151	48.1306	3632.07	3499.55	3959.82	4322.96	4143.37	3797
YLR413W	481.57	88.2348	413.82	553.025	395.534	522.215	4276.97	3942.84	3421.93	3588.04	3484.25	3712.14
YLR419W	39.62	33.309	34.577	31.0911	28.5481	29.9309	194.712	191.515	165.221	182.135	154.949	171.803
YLR432W	373.27	178.462	277.865	336.27	295.573	397.592	26271.8	26995	25074.2	25653.7	27069.6	31136.6
YLR441C	2017.6	1377.23	2133.61	1963.08	2123.69	2441.24	92449.7	88366.3	87634.5	88397.4	88144.6	90448.2
YLR448W	786.8	553.898	879.351	876.68	999.185	839.312	38423.3	36632.3	36299	35322	36247.2	35066.1
YLR449W	176.32	71.1367	109.082	100.327	93.4297	93.9482	14148.3	15181.1	13446.2	12754.3	12076	11119.8
YLR452C	214.8	110.602	92.5034	135.261	141.698	140.686	5978.23	6034.87	5410.35	6101.56	5606.65	6064.55
YML008C	326.98	274.011	244.872	227.416	232.754	207.075	53824.8	54922.4	52671.6	51115.5	49816.2	46814.9
YML010W	115.98	100.387	120.674	112.332	102.513	94.1024	2343.07	2485.7	2573.09	2455.43	2470.14	2307.43
YML013W	44.4	70.1558	46.4096	43.9816	43.3665	48.7761	12618.9	13133.4	12549	13851.9	12911.6	12232.7
YML022W	258.12	115.99	168.369	217.156	237.68	252.067	11200.6	10945.5	8482.79	8574.32	8482.27	9159.04
YML024W	2005.75	1056.28	1748.48	2061.28	2114.92	1871.05	30922.3	29814.2	27523.3	27460.9	27536	28986.6
YML026C	1402.65	811.058	1300.15	1470.02	1228.47	1156.64	112076	111953	100983	94834.3	90995.7	98630.7
YML031W	64.07	49.6232	58.3987	52.5776	58.6499	64.2772	3029.18	3543.29	3284.44	3216.39	2981.04	2627.02
YML032C	35.05	51.398	32.7458	36.4941	39.7282	34.1974	1083.68	1318.39	886.455	1168.18	1052.52	1140.68
YML056C	587.35	156.901	287.95	371.054	324.101	456.721	2970.99	2663.48	2575.08	2523.04	2361.69	2185.76
YML086C	109.88	92.5749	104.995	114.38	113.761	129.554	6185.58	5903.91	6314.77	6210.57	6268.46	6326.78
YML093W	106.5	42.4528	77.8908	77.4715	69.8725	71.9256	1471.64	1387.11	1312.41	1282.25	1295.77	1248.83
YML094W	63.57	42.0156	55.2787	44.2396	45.5859	45.7614	2903.61	2881.91	2890.47	2837.35	2772.6	2687.42
YML103C	96.7	75.5146	68.4485	61.5524	59.923	63.6365	11676.9	13715.3	13002.1	11165.3	11231.6	9687.23
YML123C	0.77	0.138936	0.537089	0.998582	0.782241	0.697683	334706	239463	202133	232706	260321	237245
YML124C	139.43	128.841	168.257	169.814	142.573	159.037	12331.1	11494.3	12389.7	13258.5	13927.7	12218.7
YML125C	156.97	105.362	124.45	136.779	128.434	162.576	29034	27783.4	27733.1	26151.1	25480.9	24817.2
YML126C	259.48	189.403	214.706	262.827	272.017	248.867	34807.4	34531.8	34207.3	34837.1	34353.9	33851.6
YMR004W	45.08	78.62	39.9063	41.2034	32.165	34.8662	2205.35	2251.28	2978.99	2506.09	2566.95	2220.29
YMR012W	173.05	116.189	156.531	150.352	135.205	129.111	16951.1	15812.8	17238.8	17047.8	17403.3	17103.8
YMR016C	85.8	55.6109	85.5912	81.8706	75.2329	62.3356	314.385	340.388	311.472	292.753	319.57	281.491
YMR024W	65.8	65.663	79.3446	67.6899	72.2401	77.0692	299.519	316.776	337.532	364.211	324.152	321.408
YMR049C	102.9	26.4479	48.0993	62.2252	55.733	61.0333	2676.08	2679.16	2479.57	2383.12	2400.24	2380.43
YMR074C	201.63	119.622	303.145	277.765	258.927	249.393	2548.86	2478.16	2485.49	2321.28	2449.03	2449.73
YMR076C	45.38	23.8602	63.7378	50.3153	50.6364	44.6615	7721.28	6463.79	7313.12	8062.55	8812.94	8566.54
YMR079W	171.88	95.6367	136.885	151.688	134.22	141.726	84293.6	79519.7	86620	87534	82947.6	83917.9
YMR080C	78.03	54.028	64.6547	66.3016	67.5915	70.2831	6093.16	6142.36	6477.32	6302.03	6282.57	6286.35
YMR083W	497.65	176.526	407.478	449.955	581.645	451.913	11648.7	11340.1	11556.5	11501.7	11888.2	11264.7
YMR089C	88.38	88.7928	81.814	83.338	81.8872	86.082	11466	42095.4	31180.7	40542.8	15569.3	21030.6
YMR091C	84.27	71.3472	66.6277	65.2239	64.4446	62.1664	3507.96	3577.54	2339.22	2784.29	2868.48	3858.76
YMR108W	379	168.59	311.563	323.326	313.995	396.94	31880.2	30153.8	29633.4	29541.8	28485.6	28705.2
YMR116C	1961.22	1110.71	1667.73	2256.41	3016.32	3089.01	333112	321159	296757	286105	285718	308202
YMR120C	233.37	191.05	166.601	56.7171	98.6775	145.438	60864.8	58537.8	61286.8	57292.1	54845.9	49904.7
YMR121C	58.75	56.1944	25.0791	27.801	30.7618	23.3151	720.517	677.858	684.448	710.719	736.171	699.682
YMR125W	107.67	72.7687	84.0399	85.6505	84.0988	79.0508	11256.3	11058.7	11417.6	11213	11398	10740
YMR128W	88.72	29.4975	50.1656	54.5684	47.1583	53.5236	1997.65	1845.99	1962.94	1944.97	1915.54	1723.96
YMR129W	64.37	46.0437	49.1006	53.0465	53.4394	55.6315	3410.97	3250.62	3740.36	3546.15	3875.87	3340.23
YMR142C	1903.68	1246.49	2348.3	2066.94	2236.67	2582.52	54164.7	48557.3	41292.5	42031.4	45112.7	65028.2
YMR143W	2050.12	928.971	1951.47	2106.31	1662.62	1954.58	33822.8	30355.6	30187.1	31374.6	31022.5	32025.7
YMR146C	314.73	168.06	268.697	254.068	230.877	247.57	2404.75	2387.18	2228.54	2168.1	2105.13	2167.26
YMR186W	1377.63	1508.56	1250.98	949.057	679.662	1120.61	132053	127627	132013	130439	123743	116958
YMR189W	76.1	71.6765	71.6645	59.3639	75.3103	71.8718	12045.3	11068	11926.8	12545.8	12035.6	11912.1
YMR194W	1038.5	485.007	1309.49	1036.01	1128.26	1085.8	31591.9	32714.1	30880.4	29798.3	29825.2	29185.2
YMR208W	81.53	60.2665	60.4403	65.1534	57.7768	59.5787	3303.6	3240.87	3232.66	3414.1	3290.17	3212.98
YMR214W	53.7	48.3082	57.4005	53.1898	49.7748	52.7787	8260.29	8292.35	8520.92	8314.36	8163.74	7721.55
YMR215W	135.77	27.2928	105.092	170.875	147.5	171.425	16447	18151.2	17510.4	16591.1	17390.6	16938.4
YMR220W	77.2	76.8029	75.893	82.1283	88.3575	79.2513	79.6715	71.2043	69.0955	65.1545	69.1319	71.4619
YMR229C	164.7	27.9225	80.9198	91.3271	83.6757	101.861	8862.17	8196.45	7900.07	7661.45	7484.64	7418.95
YMR235C	184.68	142.533	164.401	184.758	160.038	150.174	52245.6	49154.4	49976.1	52465.3	52076.4	55160.6
YMR241W	260.37	107.501	194.38	279.998	248.422	219.114	2926.11	2681.64	2742.39	2645.86	2647.89	2705.22
YMR243C	216.45	107.792	139.3	188.533	179.704	212.138	8197.04	12902.6	10026.6	11656.6	10377.1	10383.7
YMR260C	844.23	572.829	920.562	871.377	628.458	760.033	35104.5	36377.3	32934.6	32994.3	33425	31814.9
YMR276W	168.67	261.277	163.733	136.951	128.334	157.342	3930.3	3895.86	3781.11	3967.69	3780.06	3932.34
YMR285C	45.92	47.6842	42.7479	39.6455	41.8011	40.983	3573.31	4537.2	4272.09	4160.9	4012.08	3704.76
YMR296C	222.55	238.958	241.843	225.436	208.431	220.614	22379.5	23742.8	22835.7	21927.5	22184.2	23353.4
YMR308C	166.88	100.035	147.619	151.729	153.864	168.954	15514.7	15152.8	15106.6	14940.3	14361.6	14469.3
YMR309C	200.07	122.075	149.118	164.642	125.04	146.771	78886.7	76318	78167.4	78731.1	78902.4	75446.7
YMR318C	223.75	202.764	269.905	276.56	186.685	229.891	21692.8	22409.4	22804	23213.9	23389	24321
YNL001W	77.37	70.77	62.0607	60.0903	54.7917	63.7716	1720.43	1578.3	2012.47	1549.01	1960.48	1617.31
YNL002C	239.05	84.3281	156.617	167.123	132.471	139.449	7721.28	7573.06	7235.06	6829.59	6596.44	6362.63
YNL010W	360.4	189.896	291.23	347.27	367.324	289.907	12618.9	11759.8	11155.4	11513.9	11648	11948.3
YNL030W	1359.93	1285.23	1305.63	1231.91	1096.22	1640.82	680599	671665	642428	613120	609034	662375
YNL059C	130.93	162.245	111.516	121.109	108.602	94.4542	2169.06	1583.43	858.34	1700.91	1753.48	1370.59
YNL061W	142.35	41.7209	76.0851	89.7754	71.2922	92.0597	18697	18715.6	18088.6	16863.8	16643.3	15896.3
YNL062C	41.32	15.4752	25.3856	27.1027	25.8429	27.9021	2578.78	2449.24	2361.58	2356.27	2331.51	2245.76
YNL064C	394.45	242.151	232.264	227.179	236.208	336.329	118525	115409	115829	109906	103482	99274.2
YNL067W	645.53	262.912	514.162	578.698	613.413	385.251	76022.2	58599.1	68352	71690.9	73674.1	71391.8
YNL087W	65.88	25.9474	43.7258	47.1044	39.3595	48.258	2630	2369.99	2362.69	2451.46	2405.96	2121.26
YNL088W	58.92	30.7006	62.1562	57.435	52.4571	51.0398	5727.81	5489.65	5652.3	5795.81	5805.58	5662.87
YNL096C	1281.45	632.485	1207.72	1173.41	1071.48	1208.64	43518.9	41277.3	38113.8	37919.5	37171.1	38617.7
YNL097C	24.33	38.092	35.4833	30.5463	30.2337	28.9379	3247.75	2323.41	2144.04	2847.73	2158.9	2719.82
YNL102W	50.5	22.23	54.2359	43.387	48.0405	45.3581	1054.72	882.105	1081.27	1269.72	1420.88	1377.66
YNL110C	253.63	109.12	159.39	157.665	127.987	138.671	4276.97	3968.37	3278.21	3307.95	3704.44	3922.43
YNL113W	126.32	58.7309	112.559	85.2452	90.9514	89.0641	8681.52	8388.69	7482.09	7630.71	7288.76	7306.45
YNL118C	89.95	96.3746	91.8755	93.4409	74.589	77.1977	8527.6	9796.65	7454.59	7158.59	7701.06	10307.9
YNL121C	167.43	152.487	181.823	176.482	183.704	158.892	45289.1	46131.9	46399.5	47611	48100.7	50102.2
YNL123W	135.25	91.1736	98.0609	103.782	101.918	106.903	3148.83	3283.33	3195.47	3053.17	3150.73	3061.92
YNL141W	120.7	14.9203	34.9477	43.8847	41.8802	89.3775	20675.4	21594.6	19819.8	18056.1	17721.9	16440.9
YNL154C	142.22	141.84	138.451	138.158	120.893	120.203	6162.43	6131.74	6452.4	6122.79	6437.84	6217.24
YNL162W	1383.37	1117.17	1505.8	1619.63	1803.52	1472.43	13642.3	13196.6	12824	12814.6	12908	12898.5
YNL163C	66.83	52.4977	47.3884	55.5514	54.9603	56.5542	7770.94	7269.67	7219.08	7526.91	6708.52	7176.72
YNL168C	50.22	35.4128	51.6565	43.6732	52.049	51.3087	2548.86	2596.79	2476.22	2392.79	2360.26	2024.66
YNL175C	166.62	47.1694	138.46	118.142	103.511	133.695	3830.08	3720.03	3626.7	3423.61	3224.58	3239.73
YNL197C	47.73	31.0558	53.3282	46.3145	46.363	50.699	5727.81	5427.39	5949.45	6195.83	5995.12	5206.41
YNL201C	52.83	34.9527	40.1337	38.2239	40.6131	42.8534	7012.37	10459.8	9004.6	7470.28	6712.3	5541.31
YNL209W	1410.88	880.651	1361.23	1715.18	1568.81	1969.58	103902	94120.5	92364.9	93821.3	95016.5	92815.1
YNL212W	67.5	71.8257	55.3	56.4587	55.7456	59.9512	3497.22	3782.15	3743.84	3549.19	3611.58	3513.69
YNL216W	56.28	49.651	45.5101	43.2697	39.9871	49.3967	4387.61	4635.01	4707.07	4386.79	4107.18	3682.3
YNL220W	385.03	210.643	288.115	182.748	261.186	314.265	56792.6	56022.9	56525.9	54976.4	53109.7	51612.2
YNL247W	198.07	104.526	159.914	165.168	137.943	169.171	22968.3	22618	22104.4	23001	23170.6	23916.7
YNL255C	202.48	129.458	221.56	199.562	218.306	265.413	96655	108226	96461.4	90222.3	87398.6	54998.2
YNL256W	60.42	36.2616	40.0552	40.2191	48.0901	49.081	4589.08	4881.43	4531.88	4333.51	4255.56	3726.41
YNL281W	175.9	104.988	156.603	122.427	123.786	162.309	8527.6	8742.3	7979.52	7832.58	7379.49	6824.63
YNL308C	365.55	170.42	287.131	275.858	189.364	242.42	1784.37	1744.51	1663.24	1639.39	1592.12	1515.31
YNL310C	37.78	33.4086	61.6727	43.4625	56.5113	47.7169	1524.84	1834.77	1624.85	1731.82	1912.86	1676.91
YNL313C	57.5	23.2541	37.1258	37.3568	36.9163	34.6344	8070.99	7194.95	7808.66	8083.64	8785.59	9212.2
YNR016C	446.05	257.863	297.316	341.076	322.292	392.695	20205.8	19151.3	18688.2	17932.2	17412.2	15401.5
YNR021W	210.55	142.849	197.958	178.326	174.606	182.828	34906.3	33210.5	37583.7	36008.5	34951	33158.7
YNR038W	51.48	28.6003	33.1817	38.5063	36.6971	36.2683	12734.3	12975.6	13048.9	12957.1	12454.5	11672
YNR043W	145.27	88.6641	122.59	108.096	111.574	129.79	13671.9	14001.5	12495.7	12170.3	11589.1	11564.7
YNR046W	163.67	84.2857	145.453	134.281	147.567	156.663	4802.93	4524.21	3538.1	3519.98	3220.41	3166.31
YNR051C	204.82	191.703	146.313	130.921	162.549	138.174	11676.9	11896.2	12151.5	11510	10821.4	10593.6
YNR053C	136.4	70.0975	77.1061	94.6331	87.6409	89.4144	67680.3	69646.6	66779.3	64563.2	63505.7	62576.1
YOL004W	111.25	145.858	111.737	120.144	95.768	89.6027	1662.37	1641.89	1697.54	1527.85	1607.72	1440.67
YOL005C	167.68	144.175	268.336	189.775	206.826	223.413	4276.97	3344.94	3987.7	4028.42	3885.12	3722.44
YOL010W	106.82	58.8075	84.1204	90.7098	95.2963	97.7266	10006.5	9769.71	9352.02	9522.11	8534.76	8815.65
YOL021C	100.93	77.6438	67.691	72.9577	71.7314	75.3203	606.198	655.707	642.619	600.389	604.202	605.558
YOL022C	82.28	41.8311	65.1723	62.5974	66.0543	71.4774	124.51	122.988	119.134	111.285	117.76	105.625
YOL027C	151.62	145.607	168.63	175.288	143.672	128.198	7388.64	7631.77	7811.6	7651.47	7862.73	7768.69
YOL038W	237.5	535.249	304.062	239.065	263.36	268.095	16761.5	17149.9	18661.4	18242.9	17518	16252.7
YOL041C	126	64.6562	83.7936	91.6811	67.5816	69.5229	5909.61	6191.68	6241.38	5720.73	5533.88	5262.11
YOL045W	51.73	41.0452	42.5072	39.9783	41.7086	40.704	2217.41	2708.52	2028.02	1921.28	2073.12	2100.62
YOL052C	80.12	38.1684	59.7189	60.3745	58.3815	74.5333	7060.58	8455.68	5943.77	5687.65	6496.45	6092.63
YOL059W	124.58	71.7627	71.3169	110.831	88.1906	88.8837	8965.92	8653.02	7258.95	6909.1	6491.87	6908.82
YOL061W	135.32	77.4655	104.275	119.718	124.965	144.683	3307.83	3370.21	3266.13	3026.43	3032.81	2672.27
YOL064C	147.6	117.432	200.809	177.483	218.827	222.626	7327.54	6806.2	7173.7	7393.24	7536.86	8333.75
YOL077C	176.37	55.1056	106.983	126.035	125.641	144.596	13200.7	12832.5	11698.9	12215.7	11621.6	10856.3
YOL093W	49.6	27.7097	44.855	36.3238	42.4013	44.7914	4092.31	3303.23	3132.06	3233.47	2865.09	2758.33
YOL097C	204.73	121.341	211.723	161.487	171.397	207.87	12125.8	12599.8	12623.9	12334.2	12400.2	11789.1
YOL098C	86.97	79.3421	78.6992	69.9282	64.3794	73.1479	8121.34	7188.44	8606.77	8334.79	8251.88	6954.58
YOL121C	1204.07	631.043	1391.89	953.05	1104.63	1186.78	29034	26591.9	25173.1	25433.3	25573.7	26920.9
YOL142W	85.35	58.9064	73.9978	75.3612	69.7088	61.3231	6047.11	6409.54	4740.93	5001.13	6534.13	6376.18
YOL145C	88.98	92.7111	82.8938	73.2557	68.1502	62.6039	12879.7	13788.7	14665	14720.7	14922.4	13723
YOL149W	75.73	51.168	62.5778	46.7804	47.4787	50.9428	2881.07	3266.46	3168.26	3084.82	3474.96	2808.49
YOR001W	78.33	46.943	56.6288	63.7998	60.7279	61.6095	2156.94	2059.26	2097.79	2074.85	1896.1	1784.65
YOR004W	102.47	29.9631	71.5391	73.2469	69.9427	91.3027	6964.27	7756.52	6982.56	6775.97	7382.88	7566.68
YOR007C	506.33	489.378	558.11	426.432	392.027	470.893	9424.18	9638.18	9032.69	9159.23	8875	8143.17
YOR014W	76.98	99.6135	67.4142	67.6768	61.9564	62.5141	299.519	274.806	367.9	346.664	321.422	309.713
YOR021C	189.23	107.655	117.93	138.944	119.559	134.492	2519.73	2587.51	2314.31	2337.12	2364.86	2403.61
YOR027W	254.82	405.641	199.583	118.295	106.065	168.144	67558.8	70943.6	72361.4	70330.7	65313.1	59017.2
YOR046C	144.35	137.582	134.917	122.892	121.882	108.996	14902.6	15423.5	16187.7	15977.1	15972	14803.9
YOR056C	77.7	33.6718	53.9704	59.1469	55.2825	54.3752	4485.08	4377.55	4453.06	3961.95	3985.57	4095.38
YOR061W	111.25	84.7847	78.8814	82.678	85.6097	77.1021	4537.59	3944.27	4931.51	3663.37	4601.49	4239.58
YOR063W	4465.47	2649.15	3977.53	4524.88	4608.47	4794.58	450.486	419.832	387.833	387.404	390.132	405.85
YOR085W	153.73	93.301	169.36	195.805	181.671	166.548	4031.32	3859.34	3823.73	4031.22	3946.46	3960.76
YOR091W	78.43	46.7873	65.7847	60.4655	51.9934	51.6251	4215.13	3999.42	4259.29	4293.71	4150.34	3988.25
YOR095C	170.32	55.6193	116.069	113.903	125.608	189.825	5682.63	5391.88	5249.47	5073.43	5031.66	4747.22
YOR098C	67.57	53.0637	62.296	61.19	59.8785	59.3873	468.395	407.445	460.361	383.858	456.306	365.6
YOR101W	152.87	60.9455	121.226	103.584	110.281	125.335	2046.99	1860.13	1667.84	1887.94	1787.14	1962.08
YOR108W	152.67	45.9038	124.488	146.974	161.808	162.585	28754	30606.9	28255.4	29738.7	28234.2	31146.6
YOR123C	132.43	136.841	132.448	114.661	94.8971	97.3913	1112.45	1173.41	1089.31	1101.75	1137.84	1082.8
YOR143C	47.38	40.6304	45.8685	47.4639	40.795	48.8113	3324.17	3839.3	3291.16	3216.63	3118.27	3520.16
YOR157C	208	404.669	214.782	171.024	241.205	199.929	11396	13438.6	12174.8	11960.9	11841.1	11199.2
YOR165W	79.85	66.1077	85.5203	76.4757	70.0355	81.894	2265.49	2023.4	2324.61	2306.52	2335.49	2227.98
YOR167C	4899.62	3159.01	5467.4	6116.19	5200.87	4761.74	94491.2	89176.4	86134.5	87214.7	86920.9	94835.2
YOR168W	265.57	198.385	206.581	186.79	203.057	196.424	37492.1	37155.6	38789.3	37881.9	37944	36654.1
YOR182C	3850.23	2742.03	4648.94	3743.45	2681.41	3323.24	18523.8	18212.9	15205.4	15686	15334.1	15889.2
YOR195W	32.88	18.5789	34.7325	25.5838	23.547	21.0439	314.385	370.398	380.796	305.344	278.289	245.85
YOR198C	248.62	208.794	256.867	248.937	208.138	212.113	33431.5	33747.8	34541.7	35658.6	36087.2	35239.7
YOR206W	155	43.6227	83.0369	86.1957	74.095	79.1334	28954.2	29718	29270.8	26551.2	27044.1	25091.8
YOR207C	99.42	48.3998	92.4803	82.3829	74.1551	82.0129	1948	1962.61	2004.41	1870.78	1857.8	1761.69
YOR217W	54.8	44.5045	54.2578	49.9098	42.6625	44.1603	2356.38	2781.8	2534.62	2358.41	2309.46	1980.34
YOR224C	347.23	192.003	334.314	275.301	342.207	397.571	6208.75	5870.88	5810.44	5623	5872.93	5705.17
YOR229W	40.57	33.1604	36.6081	38.7449	43.4388	49.1825	3750.49	3186.04	3349.54	3537.22	3407.17	3091.25
YOR234C	1414.22	578.463	1356.5	1644.91	1263.41	1569.69	65576.1	59044.7	62547.4	62634.9	62568.3	61551.2
YOR239W	212.18	179.104	200.434	201.371	202.555	194.408	17014.4	17875.4	17970.4	18749.1	16169.9	18316
YOR243C	88.47	41.3416	55.04	59.1663	52.3891	61.0802	4153.58	3971.08	4214.04	3930.87	3824.84	3754.13
YOR252W	90.77	34.1878	72.9304	54.7731	50.6282	59.1402	5347.39	4726.97	4566	4165	4346.11	4363.49
YOR254C	197.45	133.055	193.831	153.095	158.82	168.589	17716	16959.3	17477.9	17934.4	17095.7	17032.8
YOR260W	127.55	119.98	85.6008	83.0064	82.9329	87.3222	9534.08	8468.76	9103.44	9315.96	8978.21	8470.9
YOR271C	139.78	60.3958	94.6758	79.3015	105.281	108.152	9292.52	9613.93	9245.82	8705.44	8036.24	8072.79
YOR272W	100.33	26.9962	71.5383	62.4326	67.2183	76.1013	6665.95	6912.17	7029.12	6337.74	5824.42	5575.89
YOR276W	315.95	232.292	262.466	300.204	281.148	298.004	26908.7	26539.4	23646.9	22985.9	22881.9	26236.7
YOR293W	2744.52	1771.68	2138.27	3479.44	2362.54	2426.69	54051.3	52523.2	53478.5	52289.1	48965.2	38701.5
YOR304W	54.52	52.7331	48.9281	46.1273	43.9357	42.2711	1524.84	1075.75	938.902	1169.37	1206.9	1159.32
YOR310C	815.02	269.623	610.812	682.828	616.206	668.809	34661.4	32294.4	32813.5	31960.2	30912.6	29488
YOR321W	39.47	31.7017	43.5703	38.9765	39.2918	41.238	2721.97	3619.73	2127.43	1926.56	2707.41	1927.65
YOR326W	323.78	216.529	358.342	354.059	270.827	291.218	4339.08	4270.62	4420.67	4679.04	4710.25	4432.78
YOR332W	427.88	399.828	397.067	435.928	464.959	412.111	16134.3	15845.3	16112.7	16759	16649.4	17120.2
YOR335C	255.3	127.117	214.509	235.728	185.792	239.83	33848.7	33150.1	32540.2	32616	32247.7	31556.4
YOR340C	149.78	37.3306	80.7148	96.7656	99.4938	82.1183	4072.33	3894.42	3755.75	3996.96	3762.33	3785.61
YOR341W	208.1	44.8119	128.574	155.684	141.569	158.514	2835.84	2632.8	2670.58	2610.23	2562.5	2501.74
YOR361C	287.75	189.639	189.609	233.546	203.84	207.299	47538.9	45245.4	46059.4	46867.5	45002.5	44557.1
YPL019C	34.65	6.35013	19.5217	30.4629	21.2319	20.5762	2630	2410.47	2290.89	2250.82	2219.94	1999.42
YPL028W	297.1	224.737	270.734	320.302	279.119	258.789	60894.6	60802.8	55331	54007.4	54722.2	53836.3
YPL032C	98.68	40.7663	99.3271	86.2091	82.2405	85.9872	2181.17	2302.31	2270.34	2128.2	2283.16	2503.3
YPL037C	901.13	819.416	1126.09	1207.58	1030.31	1118.27	17973.2	17648.3	14363.7	15234.4	14742.5	16040.1
YPL043W	131.97	49.3014	75.0341	86.1808	80.3954	88.1394	4986.24	5060.67	4771.61	4397.58	4278.49	4397.39
YPL058C	105.65	30.8903	56.1574	78.3351	70.1076	81.7786	752.326	731.511	699.367	624.059	471.836	401.942
YPL063W	121.15	92.238	97.6706	98.4053	95.5725	84.8603	2402.32	2330.44	2373.36	2513.34	2305.5	2459.17
YPL079W	1256.02	682.733	1521.1	1404.68	1578.14	1618.51	66444.3	81959.4	58056.4	58139.8	58087.6	61320.5
YPL082C	60.32	38.1968	49.5836	52.86	48.8097	51.0223	6559.55	6515.71	5769.74	5675.99	5480.44	4714.66
YPL086C	66.8	34.3809	45.9086	43.7906	44.7182	49.1935	4760.16	4435.18	4671.34	4668.46	4548.12	4171.05
YPL090C	1733.12	1043.43	1731.55	2057.95	2005.4	1656.06	65985.6	65150.6	58885.3	59219.9	60021.7	67396.5
YPL093W	208.42	58.8707	121.352	147.248	156.019	161.226	28011.3	24420.3	28993.9	29257.6	28425.9	26588.8
YPL101W	40.08	37.1015	40.0177	39.8248	40.666	40.949	357.977	262.078	318.702	273.115	272.359	204.315
YPL105C	135.35	105.699	90.6663	102.36	99.9888	85.8086	830.424	572.907	2011.25	1668.71	1325.46	1641.26
YPL106C	710.1	687.181	695.927	604.119	516.193	626.062	71727.1	70621.7	68980.5	68616.8	65005.9	62623.7
YPL117C	206.18	147.507	232.928	215.163	202.955	252.067	25460	26284.2	24694.7	25425.3	25111.4	26347.5
YPL126W	127.8	37.9255	66.9674	79.1443	76.6454	86.3099	6559.55	6604.31	6386.92	6263.72	6191.81	5734.33
YPL127C	128.4	72.0337	176.244	175.982	157.265	123.323	6559.55	5968.39	5112.51	5508.23	5539.66	6265.72
YPL146C	163.05	88.3311	109.757	128.485	101.083	94.3957	1603.79	1604.52	1519.13	1465.24	1459.57	1404.89
YPL160W	239.13	179.987	233.813	227.224	204.274	246.31	157764	156615	159291	161857	164800	170151
YPL183C	82.35	37.3738	53.1674	53.6975	50.3371	53.7445	3454.16	3388.11	3741.54	3273.58	3355.88	3292.3
YPL184C	86.72	70.048	80.6737	107.827	83.6164	83.9306	7945.54	8833.9	8199.7	8153.82	7499.98	7620.75
YPL195W	111.38	112.994	96.7969	99.6065	92.1359	88.593	13524.1	11938.4	12960.7	15256.8	13282.8	13751.6
YPL198W	605.85	356.373	536.867	640.171	660.409	765.267	7084.72	7343.46	6623.68	6561.05	6576.17	6636.27
YPL199C	102.43	79.8702	94.5196	76.2001	80.9563	85.8169	2132.63	2156.28	2112.81	2110.67	2093.56	2009.16
YPL204W	163.22	202.132	170.718	138.326	157.776	141.323	10296.6	11477.3	11872.5	12173.6	11733.4	12360.8
YPL207W	97.25	40.8708	73.6114	92.6335	77.9637	87.4408	5413.93	5119.67	5511.68	5619.25	5791.36	5784.31
YPL210C	90.78	76.1385	73.0364	76.0797	73.8684	72.4121	11776.7	11465.8	12502.7	12294	11881.1	11215.9
YPL211W	144.58	40.9026	97.7016	100.477	111.385	112.432	5171.2	4597	4951.63	4892.69	4817.79	4740.5
YPL212C	87.7	40.5821	77.0359	77.5695	75.4906	73.7188	8133.94	8802.51	8259.08	8424.53	8555.71	8319.3
YPL220W	1253.02	585.999	1336.51	1325.9	1540.04	1468.77	115702	109278	103283	103286	104579	110025
YPL226W	240.5	93.728	167.993	209.191	171.236	220.646	37569.7	34890.9	34857.8	35559.4	35051	35001.9
YPL231W	538.93	351.733	410.349	525.053	488.297	464.146	16982.7	16812.5	16480.2	16285.5	16285.4	15597
YPL235W	127.23	134.592	102.085	113.87	96.645	96.9708	3032.42	2999.26	3372.61	3254.73	3343.44	3070.82
YPL239W	93.05	56.9041	84.0622	70.7273	81.3584	73.9312	13054.5	13148.4	12508.4	11980.8	12114.4	11049.5
YPL243W	136.35	154.066	116.421	122.832	98.8168	109.963	6278.46	6295.37	6457.52	6236.36	6236.27	5800.88
YPL263C	73.4	42.4609	57.6492	63.7807	56.1548	69.3895	4011.05	3686.39	3737.51	3528.64	3715.34	3804.07
YPR004C	112.15	89.0124	125.876	120.89	124.753	133.336	2948.57	2967.9	3121.89	3177.68	3197.48	3166.83
YPR016C	242.85	177.756	153.881	210.687	239.278	216.456	18621.4	18352.8	18267	17715.7	17901.8	17645.6
YPR019W	67.43	49.9835	58.2668	64.149	62.7522	60.5993	8802.64	9056.5	8873.01	8926.58	9416.69	8800.7
YPR024W	69.93	96.7248	65.2327	67.9875	66.7559	73.3904	20139	20577.9	17293	18469.4	17933.3	19355.7
YPR033C	315.8	163.642	319.301	293.475	270.734	279.257	26765.7	26018.9	25396	25213.3	24170.4	23430
YPR035W	1406.82	886.298	1983.53	2257.24	1407.59	1242.69	345680	332354	334139	367645	372715	337773
YPR041W	306.57	217.561	275.002	261.902	254.944	294.144	48268	48239	48746.3	48817	48506.4	47740.7
YPR043W	4291.25	2878.68	4691.59	3654.32	5520.36	6243.76	44582.7	43880.8	35799.2	34784.2	34430.9	38241
YPR062W	221.43	206.458	195.938	264.115	201.248	196.813	5182.16	5158.5	4971.29	5024.24	4923.79	4696.57
YPR075C	49.23	78.4082	67.5391	60.2264	64.1402	54.2255	1155.25	1161.49	1227.57	1210.66	1088.28	1021.2
YPR097W	68	54.6184	58.6723	52.1979	52.4221	55.1774	3082.44	3282.49	3314.54	2825.46	2924.54	2552.75
YPR102C	1934.63	1240.54	1883.86	1846.15	2222.33	2016.16	39036.6	37833	37156.1	37377.3	37651.9	37968.2
YPR103W	213.52	419.924	250.403	175.962	220.302	213.453	8527.6	8625.98	9478.24	9514.17	8852.81	8831.9
YPR112C	83.27	24.5661	47.2771	53.1053	47.2844	52.2768	2217.41	2404.67	2223.08	2045.87	1933.6	1863.76
YPR118W	104.15	63.4535	84.469	106.592	71.6296	86.0412	921.776	862.021	873.201	861.608	811.539	777.853
YPR125W	83.83	89.5479	71.5861	69.2521	73.082	78.8107	11256.3	12522.5	12099.2	11410.2	11100.6	10834.8
YPR128C	43.77	41.7041	40.7444	46.6426	44.1988	47.6193	2253.49	2830.01	2460.05	2202.48	2210.78	1980.29
YPR132W	2733.97	1369.56	2189.57	2423.39	2155.1	2261.17	3335.05	3109.62	2409.5	2502.46	2428.08	3186.68
YPR133C	79.42	95.8454	78.5385	74.3417	64.9126	57.7851	2828.6	3093.37	2918.04	2855.66	2857.81	2984.41
YPR137W	75.32	43.733	54.8277	53.5062	49.2816	47.6146	5127.44	5894.74	4549.66	4644.68	4381.11	4840.89
YPR143W	195.37	100.729	166.196	158.419	139.035	121.903	6197.16	6744.53	6364.38	6128.38	5791.5	5213.62
YPR144C	68.3	25.46	38.9343	43.8236	41.7063	45.385	1629.89	1541.64	1749.56	1468.04	1285.9	1101.92
YPR161C	40.8	36.8809	35.4652	32.2262	33.9271	35.3938	2071.55	1941.39	2679.08	2255.04	2302.92	2015.8
YPR163C	405.28	208.648	389.843	353.885	315.679	361.281	23983.6	25346.5	23357.3	22347.1	22518.7	21518.2
YPR183W	294.73	172.616	396.175	410.752	374.856	397.803	1885.49	1936.18	1936.57	1969.91	2047.29	1948.26
YPR187W	329	235.18	281.718	288.553	311.825	283.154	6093.16	6793.37	6439.94	5926.8	5940.78	5650.03
YPR189W	57.28	54.5238	53.4766	47.6403	43.9074	43.4891	11931.6	13251.3	12037.7	11930.4	11646.8	11302.3
YPR190C	57.62	28.3745	42.3874	41.7031	38.8998	42.5162	2521.89	2411.18	2777.3	2530.97	2801.08	2627.2

## Sheet: input_Rapamycin
genename	R0	R20	R40	R60	R120	R240	R360	P0	P20	P40	P60	P120	P240	P360
CPS1	0.608183	1.07101	0.887615	0.751455	0.661021	2.12488	0.662522	0.429662	1.14526	2.68678	2.27937	8.60535	9.21675	15.3594
PYC1	1.27605	9.47925	15.553	13.8818	7.3221	6.46525	5.10793	0.787447	1.23638	1.72599	1.84625	2.00555	3.35595	4.5505
GDH3	1.0012	2.49296	5.60938	6.45273	7.38063	6.33397	7.47754	1.15715	1.5619	2.33131	1.90259	1.98212	2.59311	1.03733
GDH1	1.1629	7.39869	12.3807	4.06887	5.92336	7.1299	13.3941	1.35396	1.33534	1.96941	1.77625	1.24738	2.37093	1.59477
DLD3	0.821935	5.32938	11.5274	9.60926	4.91184	28.0477	3.50902	0.568635	0.527275	1.00207	1.53682	2.73283	19.235	16.7888
IDP1	1.0506	1.50151	3.31489	4.23865	2.55423	3.58412	0.939829	0.883973	0.842178	0.767379	1.71512	1.13052	6.77173	14.3007
ADH3	0.81386	1.20314	1.36069	1.22005	0.964882	5.13564	5.28562	1.21402	1.96188	1.1011	2.21136	1.05978	1.42321	1.23722
HEF3	0.875998	0.915707	1.1698	1.49725	2.90966	3.80862	5.57257	1.3377	0.892861	1.04183	1.00971	0.931959	0.673249	0.449394
GLN1	1.24639	2.55472	1.59632	1.22411	1.03702	1.54034	1.18035	1.87106	2.51118	1.90427	5.09615	2.64236	1.13077	1.39138
GSY2	1.08423	2.45512	1.77334	2.0054	2.97494	1.3221	1.16742	1.79393	1.44602	1.29135	4.17976	6.84045	0.93755	1.55618
HXK1	0.968842	3.75871	1.78031	1.88983	4.31134	1.174	4.30543	2.0881	1.78528	2.34727	4.16468	3.53207	3.65473	1.68365
YAR010C	2.66472	3.15484	2.94135	3.62952	5.79554	1.59195	0.965322	0.822177	0.923193	0.684674	1.16113	1.15985	0.862344	0.868041
YDR210C-C	2.85165	4.77391	10.2559	5.05181	7.16736	2.40803	1.82503	0.757301	0.92643	0.707718	1.24239	1.21765	0.835365	0.873574
TSA1	2.09504	2.36532	5.02385	1.81017	2.83618	0.564128	1.34541	1.17641	1.00811	1.31207	1.25601	0.865253	1.01534	0.920071
FBA1	1.6865	3.7891	4.49955	1.72425	1.22733	2.3164	1.55986	0.985408	1.04038	0.958928	1.21797	1.11403	0.801577	0.654806
YGR161C-D	2.16146	5.18722	1.99477	1.88992	1.94668	2.07662	1.42331	0.925257	1.21781	0.563067	0.561688	1.05789	0.72802	0.9448
YBL005W-B	1.87241	2.28394	2.80671	1.96472	2.36769	2.08744	1.45443	0.802853	0.911375	0.701245	0.519078	1.13202	0.714713	0.784198
YDR316W-B	1.84814	2.17946	3.18772	2.90333	3.16769	2.18823	1.74075	0.814938	0.966252	0.68578	1.12596	1.23594	0.798357	0.778972
YBR012W-B	1.72846	1.81886	2.45602	3.10205	1.59146	1.99675	1.50529	0.808182	0.95396	0.689763	1.02869	1.17634	0.780162	0.758163
YDR365W-A	2.09856	2.59353	3.26335	3.19989	1.39206	1.7483	1.30391	0.836022	0.920657	0.681498	1.15191	1.16565	0.831238	0.846402
YER138C	2.04052	1.72708	1.72762	3.49368	1.40243	1.4377	1.03742	0.849987	0.932598	0.663653	1.06577	1.21757	0.798427	0.815001
YER160C	1.94435	1.67408	1.68153	3.40528	1.24887	1.37667	1.0329	0.810516	0.955978	0.672935	1.07437	1.20425	0.798575	0.830431
YDR210C-D	2.08726	1.97494	1.85229	1.97816	1.60131	1.21197	1.11108	0.798078	0.945995	0.686646	1.18867	1.26007	0.760598	0.771953
YGR027W-B	1.92121	1.95015	1.88964	1.61866	1.5715	1.81757	1.24558	0.822126	0.94993	0.676604	1.05385	1.1777	0.779059	0.840251
SSA4	1.37835	2.57637	4.4872	5.07901	9.8834	2.22532	1.56053	1.04021	0.996643	0.854649	0.858327	0.872129	1.31696	1.61704
GND2	1.37062	2.31573	4.29269	3.8149	9.1633	1.28797	1.78649	1.17348	1.05086	0.953626	0.870603	1.15091	1.1337	1.71444
SSA1	1.32511	3.81213	2.97982	3.08179	3.69331	2.57413	2.11691	0.952842	0.973904	0.854803	0.92097	1.01418	1.69839	1.7448
SSE2	1.04991	2.56575	2.99633	4.16396	5.31922	2.16389	1.31116	0.698853	0.937917	0.974054	1.77718	1.365	2.43962	2.55784
HSC82	0.783114	1.77768	3.26682	3.16486	4.5376	1.56898	2.25009	0.750935	0.942469	0.9872	0.84163	1.017	1.215	1.35657
SSA2	1.25108	1.99669	2.12572	2.21245	5.15167	1.04971	1.36208	0.945631	0.973808	0.833199	0.889029	0.949754	1.56313	1.6744
YMR226C	1.11723	1.67859	2.55599	2.5727	2.1679	1.77801	1.61306	0.742221	1.21954	1.11105	0.7797	0.880744	1.83578	1.04286
SIS1	1.02714	1.76105	1.82113	2.0599	3.03894	1.97697	1.85221	1.06017	0.726094	1.02739	1.55521	0.884241	2.42345	1.13553
STI1	0.939302	1.46563	1.80537	2.49296	3.78278	1.3945	1.584	1.57067	0.73339	0.982417	0.888266	1.15515	2.29802	1.2321
GLK1	1.26183	3.97127	5.14848	3.25058	3.81107	1.24929	1.92057	0.915037	1.27496	1.49786	1.66453	2.16952	1.75146	1.14268
BAT2	1.43367	3.22423	5.22811	4.54404	2.17499	3.16711	2.15997	0.977986	1.41702	1.88256	1.22039	2.25281	1.88295	2.11289
GSC2	0.95878	1.45637	2.36955	3.3301	3.7106	1.19284	1.70082	1.40279	1.03542	1.60438	2.28714	1.97352	1.66235	1.96357
ARA1	1.01934	1.94545	2.2813	2.0269	2.64216	1.48329	1.86159	1.3418	1.33125	1.91277	1.40558	1.2317	1.34428	1.29035
TPS1	1.07109	2.52184	1.74535	1.55683	2.07501	0.920304	1.18784	1.11357	1.49437	1.75154	2.13753	2.26563	1.27436	1.29024
AHP1	1.5393	1.75968	2.17748	2.0488	1.92152	0.938899	1.41755	1.1105	1.02454	1.27194	1.94744	2.3719	1.89589	2.08671
SSA3	0.927415	0.855477	0.971916	1.56889	7.5233	0.915179	2.1874	1.18367	1.08024	0.884014	0.85578	1.04207	2.19889	2.28135
RNR4	0.798931	0.771891	0.803991	0.964295	1.74974	3.39378	4.51716	0.783994	0.780555	1.21047	0.775765	1.46466	2.8337	3.01619
RNR2	1.21346	0.992436	1.01989	1.17277	1.64333	3.2731	3.68495	0.840845	0.972128	1.10714	0.842914	0.822155	1.8867	3.83229
PMA2	0.957408	0.801949	0.91809	1.40627	5.02298	2.93899	3.84712	1.05306	1.03496	1.07417	1.53038	1.34092	2.43389	2.27136
HSP104	1.08087	2.58511	2.53717	3.28589	6.16731	2.63387	3.24209	1.00404	1.15377	1.24802	1.00069	2.91678	3.34385	3.77699
POR1	1.23221	2.54042	3.30783	2.95065	3.35432	2.89342	3.95534	0.857319	1.2538	1.49845	1.36832	2.41931	4.40817	3.20621
PEP4	1.15039	1.59813	2.21435	4.39289	2.45227	1.59434	2.68849	0.488312	0.886987	1.82584	1.07983	1.885	3.79571	2.23354
ACO1	0.817452	2.55567	3.0921	1.7543	1.70977	2.9288	1.89294	1.08516	0.841606	0.895144	1.14759	1.63818	5.73547	5.70117
IDH1	0.843741	1.5115	1.86201	1.61177	1.61416	2.07398	1.53926	0.787724	1.06778	1.22365	1.31593	1.64213	7.49511	4.6131
IDH2	0.7906	1.18278	1.5299	1.44269	1.77459	3.1396	1.73826	0.673545	0.91183	0.881746	1.17908	2.12781	2.55154	6.0127
MDH1	0.964878	2.2524	1.36134	1.23188	2.48724	2.01598	2.54468	1.49062	1.18794	1.63772	3.20793	1.17994	4.443	2.60346
PRC1	1.09554	2.5389	1.68898	1.68046	1.8596	1.18102	1.14253	0.878967	0.749988	1.56755	1.47703	2.06273	5.28556	1.67709
LSP1	0.847173	1.7088	1.44139	1.29507	1.55937	0.940227	1.04334	1.7144	1.5587	1.98173	1.06923	1.18142	5.86299	2.37534
ADE17	0.897678	0.42793	0.211793	0.19252	0.261525	0.459373	0.358573	1.5983	3.00342	2.00587	2.32277	1.82129	0.198274	0.308246
ASC1	1.28258	0.901995	0.213122	0.0637295	0.030556	0.0750558	0.179124	1.1089	0.780235	0.923178	0.739153	0.679666	0.62039	0.413092
RPL9A	0.983874	0.510942	0.142535	0.0765112	0.0484847	0.175461	0.272881	0.76548	0.904998	1.13934	1.08379	1.32943	0.583557	0.537594
RPL9B	0.796992	0.409642	0.125028	0.06315	0.042686	0.198537	0.321906	0.749674	0.94251	1.14766	1.15202	1.41172	0.554827	0.544389
RPL5	0.932989	0.533223	0.196895	0.0441567	0.0424962	0.157608	0.298824	0.811054	0.911234	1.01498	0.991699	1.15989	0.620779	0.491051
RPS19B	0.936781	0.540254	0.238462	0.0982824	0.100564	0.284921	0.500583	1.01988	0.780212	0.736843	0.828896	0.27434	0.445523	0.294945
RPS20	0.87014	0.807991	0.310156	0.10161	0.0596206	0.24239	0.495458	0.769875	0.83877	0.428755	0.661872	0.366022	1.07205	0.613736
RPS12	1.11411	0.875402	0.25677	0.102019	0.0980408	0.387271	0.504196	0.683323	0.637684	0.66048	0.607289	0.336212	1.46637	0.420904
IMD3	1.03736	0.525353	0.205932	0.14829	0.117496	0.170447	0.323444	0.927638	1.17927	1.12963	0.831274	0.679411	0.362916	0.510776
IMD4	0.985481	0.506863	0.207275	0.136295	0.125619	0.177814	0.373601	0.636038	1.05111	0.87079	0.70655	0.619843	0.236496	0.576011
RPL3	1.00747	0.752092	0.293904	0.099556	0.0742025	0.300872	0.299203	0.960515	0.907963	1.12521	1.05919	1.10515	0.365113	0.202413
RPL13A	0.842044	0.535719	0.210559	0.0783287	0.07785	0.240129	0.379148	0.84468	0.869808	0.765886	0.520884	0.79516	0.397322	0.364911
RPS11B	0.742241	0.412114	0.14053	0.0715621	0.0534348	0.279218	0.502377	0.966015	1.12135	1.22283	0.713132	0.919972	0.558071	0.257823
RPL12B	1.16899	0.473339	0.129596	0.0856672	0.0535856	0.283093	0.515916	1.01475	1.10173	0.943791	0.8229	0.683849	0.55987	0.42139
RPL22A	1.00549	0.481715	0.122799	0.0789258	0.0776074	0.297483	0.571343	1.03545	0.832087	1.11881	0.923843	0.532584	0.40266	0.421103
RPL4A	1.11684	0.828587	0.355331	0.138899	0.0881266	0.199834	0.324808	0.839719	0.963079	1.12178	0.793634	1.16405	0.446372	0.453105
RPL2A	1.16756	1.06194	0.396692	0.122771	0.120331	0.259416	0.396461	0.910893	1.09049	0.951849	0.896028	1.23882	0.53211	0.389023
RPS3	1.07128	0.845435	0.244036	0.132299	0.094617	0.405444	0.379038	0.92818	0.930195	0.99743	0.90856	1.20032	0.678003	0.51793
RPS4B	1.27229	0.78441	0.537386	0.071818	0.0827923	0.198468	0.340281	0.947723	1.00456	1.10089	0.99276	1.07498	0.630337	0.602532
RPL7A	0.974674	0.589833	0.388363	0.0843058	0.0862279	0.242033	0.526918	1.05148	1.1637	0.997537	0.733092	0.985557	0.552556	0.4842
RPS9B	1.14105	0.786687	0.294788	0.0855816	0.0534497	0.291681	0.406643	0.758117	0.929188	1.01936	1.22162	1.14673	0.520571	0.567858
RPS0B	0.968756	0.687372	0.301376	0.111102	0.0765886	0.271008	0.496794	0.750823	0.913964	0.915699	0.627979	0.69004	0.741463	0.763003
RPS22A	1.11755	0.642048	0.217844	0.0866692	0.0608643	0.156553	0.312035	1.08272	0.840013	0.960608	0.657878	0.800605	0.922622	0.663247
RPS2	1.06577	0.569129	0.161689	0.0816329	0.0696903	0.198127	0.356174	0.788207	0.796596	1.08984	1.16337	1.0442	0.592422	0.511231
RPS6B	0.881018	0.652691	0.144155	0.0963025	0.086694	0.260669	0.42425	0.989654	0.984146	1.16468	1.05119	1.20332	0.493784	0.57239
RPL27A	1.01173	0.627121	0.169661	0.0920995	0.083675	0.298382	0.407855	0.844857	0.898998	0.919753	0.860584	1.00237	0.548693	0.592969
RPS7A	1.17495	0.807185	0.16408	0.104164	0.0825824	0.230325	0.458974	0.747003	0.939552	0.905113	0.770492	0.831197	0.64755	0.69247
RPP0	0.999565	0.717103	0.197607	0.102325	0.0677163	0.168519	0.338992	0.938359	1.131	0.998908	0.932758	0.840097	0.642896	0.651451
RPS17B	1.20637	0.863653	0.211276	0.107845	0.0588376	0.533436	0.81991	1.07693	1.23613	0.571115	0.74594	0.912906	0.694676	0.880916
RPL31A	1.14971	0.552817	0.159806	0.10098	0.102384	0.45838	0.834097	0.733944	0.816778	1.23934	1.37869	0.479499	0.804919	0.627846
RPL31B	1.05888	0.705046	0.204677	0.121491	0.128129	0.532667	0.833454	0.733944	0.830229	1.23934	1.33637	0.479499	0.804919	0.638461
RPS15	1.11749	0.765796	0.243666	0.0981401	0.0784399	0.247289	0.690079	0.811336	1.27199	1.15345	0.945571	0.790425	0.619198	0.421986
RPS10B	1.29459	0.602616	0.179622	0.101006	0.0996746	0.301175	0.611844	1.25888	1.37974	1.04302	1.03242	0.736705	0.47779	0.398887
SSB1	1.13271	0.67385	0.151333	0.0981042	0.0930061	0.390293	0.677196	0.951616	0.964515	0.85785	0.953143	0.73633	0.921109	0.845638
RPS0A	0.999848	0.583422	0.178909	0.0857922	0.0938463	0.305598	0.603896	0.750823	0.916503	0.911131	0.619426	0.679357	0.755491	0.768802
RPL30	1.26877	0.671234	0.152873	0.0822886	0.070195	0.295875	0.746023	0.944076	0.964556	1.3397	0.737953	0.909258	0.723969	0.553174
RPS7B	0.94419	0.436709	0.144799	0.0969168	0.0908471	0.280726	0.490403	0.751296	1.13156	1.39161	0.971571	0.618344	0.900323	0.505504
RPL8A	0.87062	0.497878	0.140349	0.0688519	0.0736258	0.272081	0.608059	1.18817	0.957268	0.915769	0.80969	0.686369	1.07999	0.841666
RPL8B	0.821176	0.415016	0.105179	0.0564764	0.0564576	0.197	0.43636	1.2464	0.928561	0.866341	0.827947	0.668994	1.07032	0.796227
RPL20B	0.984042	0.537377	0.122407	0.0874878	0.0829967	0.277984	0.478484	1.31775	1.09384	1.11586	1.80444	1.06133	0.65859	0.866886
RPL6B	1.06941	0.744684	0.172416	0.106079	0.105524	0.331238	0.494703	1.36322	1.42672	1.14832	1.05453	0.835349	0.833939	0.871812
RPL6A	0.950483	0.561822	0.196388	0.0707622	0.0804549	0.232191	0.420673	1.29104	1.40446	1.14867	0.970608	0.857061	0.77363	0.739855
YHR020W	0.794987	0.280561	0.134531	0.156179	0.141257	0.365777	0.24307	1.16373	1.00204	0.994838	0.906356	1.0739	0.984095	1.18533
ILV5	0.889829	0.336497	0.145135	0.108813	0.0956946	0.183137	0.173053	1.21343	1.11598	1.03341	0.882336	1.13986	0.686289	0.5252
NOP58	0.748132	0.139765	0.0595978	0.0593809	0.075285	0.339664	0.552446	0.926746	0.610859	1.19024	0.936235	1.4134	1.03723	0.480384
RPA190	0.866124	0.226043	0.0829357	0.0920305	0.133905	0.598028	0.899968	1.30385	1.03118	1.08905	0.966813	0.671966	0.732829	0.508445
YEF3	0.806217	0.500838	0.192196	0.136437	0.137824	0.459115	0.672033	0.881512	0.912494	0.886912	0.969995	1.04243	0.825695	0.788161
SNU13	0.943957	0.311882	0.140281	0.155705	0.159198	0.519228	0.959823	0.754424	0.954188	1.02904	0.627081	0.950112	1.06394	0.884608
PRP43	0.892262	0.245138	0.137211	0.150474	0.236384	0.405807	0.738835	0.947916	1.16977	0.700036	0.536172	0.628767	0.770675	1.19902
GUA1	0.727978	0.330828	0.13525	0.152213	0.218228	0.555015	0.857177	1.02967	1.02894	0.891158	0.748619	0.679968	1.07637	1.30564
NIP1	0.832605	0.273496	0.18493	0.176203	0.197973	0.53415	0.742253	0.684705	0.74456	0.77784	1.11217	0.630586	0.539229	0.601784
NEW1	0.715605	0.233581	0.151518	0.164454	0.216056	0.59876	0.985701	1.00089	0.791045	1.09331	1.57408	1.52995	0.674307	0.78054
IMD2	1.08592	0.75573	0.512998	0.468009	0.320448	0.0743454	0.152231	1.11125	1.12838	1.74849	0.986132	0.442009	0.3091	0.598035
LEU1	0.727161	0.623669	0.345882	0.249693	0.34444	0.206332	0.0994209	1.0595	0.978697	1.21783	0.572072	0.955605	0.769882	1.06145
ILV6	0.9308	0.720127	0.692936	0.715979	0.615017	0.360537	0.104031	0.791463	0.769947	1.07545	0.576991	0.980605	1.11815	1.29145
RPL4B	1.15965	0.821759	0.504143	0.263564	0.112666	0.578467	0.506704	0.836242	0.953691	1.11976	0.802281	1.15534	0.454055	0.454541
RPL15A	0.930537	0.818299	0.528963	0.162514	0.112838	0.375623	0.487045	0.747965	1.2579	0.852664	0.880334	0.892912	0.608845	0.486988
RPS1A	1.00062	0.828039	0.463892	0.148458	0.0972871	0.369023	0.538586	0.819632	0.825844	0.819883	0.760321	1.21041	0.427953	0.328088
RPS14A	1.18293	0.762338	0.320167	0.131699	0.103442	0.325803	0.727581	0.716228	0.862866	1.08287	0.82786	0.760689	0.328789	0.253318
RPL1B	0.944289	0.647298	0.242069	0.156621	0.174302	0.393896	0.588145	0.661295	1.06023	0.790659	0.819646	1.14262	0.590176	0.426736
RPS18A	1.0425	0.706135	0.215694	0.124165	0.114906	0.386697	0.656226	0.867592	0.926737	1.10558	0.627189	1.11009	0.315305	0.397052
RPS1B	1.02	0.816526	0.204396	0.121409	0.1371	0.321662	0.468211	0.810805	0.839274	0.784649	0.751127	1.20499	0.409155	0.310189
RPP2B	0.953113	0.782199	0.457903	0.171033	0.103259	0.692149	0.653205	1.44788	0.976312	0.71341	0.801742	0.593688	0.633922	0.699466
RPL11B	1.23418	0.938302	0.462232	0.201336	0.153094	0.641536	0.694127	1.06099	0.811406	0.722324	0.624219	0.497998	0.611962	0.684304
RPL19B	1.16473	0.784142	0.282123	0.159774	0.204089	0.648337	1.02062	1.01845	1.23398	1.26104	1.12151	1.02684	0.542181	0.543955
TEF4	0.916234	0.641914	0.319843	0.215066	0.172291	0.41024	0.81675	1.05506	1.16198	0.937854	0.974537	0.574841	1.39213	0.614868
EFT2	0.884485	0.782316	0.301724	0.201149	0.194173	0.374904	0.544636	1.02467	0.992274	0.893276	0.890708	0.841016	0.80786	0.789454
SSB2	1.14569	0.721861	0.312131	0.155364	0.257471	0.457246	0.685764	0.950063	0.990241	0.832147	0.932936	0.733614	0.91335	0.814705
RPS8A	1.04318	0.781587	0.494192	0.232339	0.131511	1.43034	0.993384	0.858623	1.07595	1.02328	0.864553	0.79415	0.444955	0.295965
GLY1	0.799196	0.367399	0.290257	0.316143	0.267264	0.439363	0.270384	0.771117	0.855999	1.09237	0.567633	0.290242	0.511262	0.433868
SAM1	0.966905	0.547688	0.279566	0.348571	0.72864	0.399172	0.360198	1.1369	1.52532	1.7281	1.50903	1.51451	0.591122	0.583434
DED1	1.07319	0.619504	0.570574	0.544153	0.50242	0.350491	0.423271	0.885879	1.07068	0.883097	0.797442	1.31743	0.482801	0.508441
SHM2	1.41119	0.720405	0.520908	0.337346	0.260144	0.543723	0.302349	1.28783	1.83453	1.52054	1.14346	0.883815	0.700119	0.582562
ARO4	0.753006	0.50788	0.196948	0.213313	0.24164	0.706436	0.351478	0.879474	0.752321	1.16967	0.847958	0.904821	0.812814	0.966047
ARO2	0.707727	0.444524	0.294308	0.321045	0.244245	0.476774	0.32289	1.03582	0.761982	1.00448	0.593853	0.646629	0.700098	0.982918
THS1	0.785162	0.563603	0.331896	0.33149	0.321489	0.453611	0.39175	0.656334	1.00131	0.90108	1.10499	1.77357	1.07513	0.770452
ADE5,7	1.02664	0.520823	0.25384	0.251905	0.332426	0.425121	0.36466	1.08954	1.44382	0.997972	1.20391	1.52001	0.697941	0.74603
CDC60	0.845392	0.541629	0.293892	0.284601	0.256446	0.467409	0.301792	0.71136	1.48609	0.979809	1.11742	1.09117	0.89661	1.19492
TYS1	0.774289	0.561292	0.467148	0.389042	0.327718	0.660434	0.416881	0.804125	0.953595	1.14494	1.05771	0.850721	1.30831	1.31537
DPS1	0.806207	0.661342	0.491878	0.428096	0.387881	0.470978	0.274006	0.889209	0.797081	1.20849	1.07343	1.0282	0.738965	1.08155
HIS4	0.797073	0.480004	0.36118	0.45685	0.326647	0.77918	0.246249	1.21879	0.932739	0.954439	1.26391	1.27562	0.573852	0.593451
HIS1	0.834881	0.452218	0.406468	0.455659	0.341213	0.753955	0.286566	1.14129	1.03425	1.09527	1.1187	1.07605	0.507687	0.829675
HOM2	0.66397	0.718559	0.419167	0.443143	0.362698	0.704132	0.297613	1.14402	0.984154	0.786514	1.0039	0.896605	0.937861	0.802862
ADE12	0.731107	0.52889	0.42034	0.377234	0.462787	0.969675	0.412817	1.12512	0.971816	0.982199	1.01764	1.03063	1.01381	0.719172
SCP160	0.899457	0.642466	0.396269	0.340888	0.272303	0.441203	0.707991	1.12057	0.751204	1.21622	1.49416	0.814173	1.15765	0.543498
TKL1	0.882287	0.662364	0.597401	0.482818	0.27446	0.379446	0.482358	1.41144	0.850722	0.848254	0.986719	0.74434	0.988454	0.599316
FRS1	0.833201	0.501039	0.314101	0.291437	0.248767	0.454171	0.546778	0.718579	0.803435	0.891604	0.818248	0.712832	0.65712	0.432725
GLN4	0.916341	0.453828	0.312202	0.292571	0.341577	0.489257	0.758918	1.19092	0.870861	1.1051	1.08445	0.890917	0.388606	0.404608
STM1	0.742759	0.731721	0.681721	0.42838	0.274176	0.67066	1.24335	1.14628	0.937108	0.960255	0.789988	0.400894	0.466607	0.553067
BFR1	0.891587	0.89073	0.680584	0.554664	0.451762	0.542916	1.42873	1.71942	0.919208	0.574874	1.03563	0.426729	0.648276	0.57675
EGD1	0.774801	0.769817	0.67163	0.516317	0.709518	0.873777	0.974721	1.07065	0.639951	0.700041	0.599192	0.222131	0.647339	0.514405
ARX1	1.06439	0.536191	0.400546	0.424464	0.628627	0.638557	0.753336	1.12568	0.532478	0.658249	0.831719	0.421894	1.36149	1.03569
EFB1	0.881524	0.578521	0.324092	0.332472	0.404645	0.840974	1.35401	1.0386	0.635653	1.13243	0.670965	0.719977	0.351974	0.772219
DBP5	0.915643	0.599248	0.477542	0.501033	0.528205	0.974148	1.26684	0.717614	0.297539	1.02863	0.734515	0.717924	0.719317	1.01345
KAR2	0.791754	1.93241	0.847658	0.715773	0.552364	0.202699	0.758739	1.09076	1.04874	1.14258	1.22294	0.853221	0.403305	0.206466
PDI1	1.10475	1.15922	0.754086	0.609335	0.474107	0.122506	0.569917	1.32653	0.912818	1.14576	1.96808	0.974139	0.807667	0.765736
NPL3	1.06799	1.07196	1.13114	1.0551	0.433562	0.282426	0.367869	1.58008	1.08236	1.07284	1.48237	0.881227	1.84033	1.22464
ADE16	0.905143	1.17309	0.930545	0.903872	0.848225	0.453805	0.776171	1.28287	2.04607	1.10027	1.56845	1.16295	0.761014	1.21525
ENO1	1.52473	1.41516	1.31675	1.48217	0.61043	0.454764	0.754376	1.02016	1.04973	1.02902	1.00363	1.00667	1.0159	0.905449
GPM1	1.91655	1.38565	0.967207	0.813156	0.735346	0.500908	0.741909	1.07514	1.0049	1.05725	1.09878	0.826873	1.01997	1.12363
CLU1	1.04162	0.966135	0.748166	0.564364	0.705053	0.672842	0.969477	1.38768	0.993362	0.793897	1.22662	0.651235	1.01514	0.972537
ERG10	1.02875	0.864427	0.815153	0.678144	0.591106	0.457353	0.734034	0.898401	0.771442	0.490479	1.04245	0.656302	1.22571	1.24698
SEC24	1.03019	1.02906	0.870823	0.749724	0.650549	0.345115	0.564904	0.678236	0.911145	0.839953	1.7956	0.684958	1.24914	0.828565
ALD6	0.750317	1.07279	0.634152	0.501676	0.379375	0.324405	0.91262	0.913377	0.936395	0.925835	0.95508	0.897748	1.469	1.43843
PFK2	0.893234	0.770734	0.604784	0.626285	0.596851	0.550772	0.478901	0.862218	0.965502	0.882116	0.942773	1.10045	1.12326	1.39835
BMH1	0.964207	1.0272	0.715647	0.626091	0.520634	0.491266	0.760652	1.04752	1.02417	1.46422	1.25646	1.06816	0.962412	1.45288
GND1	0.752783	0.758765	0.687409	0.424153	0.468635	0.571035	0.841925	0.947342	0.827847	1.07911	1.05853	1.07515	1.01988	1.48417
GCN1	1.00423	0.768836	0.617578	0.565413	0.622203	0.537088	0.943659	0.667128	0.945457	0.987283	0.953033	0.918347	1.00534	1.36894
PSA1	0.839815	0.686255	0.624595	0.595213	0.429571	0.62037	0.915152	0.789733	1.06445	0.890097	0.938088	1.12174	0.958736	0.946472
TCB3	0.932416	0.984839	0.753562	0.666065	0.663193	0.629053	0.822475	0.850729	1.04784	0.974011	1.00409	1.59962	1.32005	1.23099
TUB2	0.892933	1.01128	0.9411	0.723119	0.527398	0.790981	0.872366	1.079	0.837075	1.1391	1.27264	1.68023	1.7822	1.15726
TRP5	0.882438	0.729687	0.594428	0.64613	0.511477	0.88108	0.62488	1.00212	0.772043	1.18452	1.13352	1.17848	1.26867	1.08538
ARO1	1.06243	0.744304	0.655079	0.805767	0.596228	1.17637	0.720829	0.805732	1.1137	1.41798	0.902009	1.31331	1.01023	1.25932
TAL1	0.956444	0.906338	0.779897	0.596966	0.519033	0.809415	0.802813	0.945602	0.991675	1.55257	0.914448	1.44591	0.891651	1.32216
DED81	0.9481	0.608297	0.298857	0.300549	0.272611	0.458333	0.429962	1.60524	0.741903	1.0269	0.75412	1.68826	2.69751	1.30063
RPS31	0.883874	0.602932	0.3657	0.21252	0.319233	0.271311	0.454915	1.84546	1.09028	1.05179	1.28291	1.45337	2.07109	2.03922
CYS3	1.13615	0.702589	0.504555	0.42699	0.664594	0.193098	0.354168	1.36983	0.962277	0.807009	1.0785	0.979271	1.23667	1.22232
LEU9	0.856013	0.628178	0.547068	0.554493	0.632778	0.323053	0.262362	0.717871	0.762582	1.34873	1.05085	1.40162	1.74256	2.09478
ACS2	0.693365	0.794563	0.722932	0.593442	0.470426	0.400731	0.335155	1.14607	1.16188	1.01765	1.38237	1.25589	1.17405	0.687733
ADE3	1.01632	0.793117	0.870037	0.890217	0.601128	0.700064	0.342006	1.24763	1.21752	0.9487	1.37078	1.30969	1.14913	1.13926
MAE1	0.966448	0.472664	0.521736	0.534341	0.535717	0.742046	0.277591	1.29567	1.41111	0.94469	1.06127	2.22764	1.19624	1.49766
ARO3	0.82601	0.543911	0.413815	0.549933	0.456929	0.87428	0.32092	1.08671	0.54396	0.827115	1.34118	1.73947	0.914025	1.37441
ILV2	0.744096	0.40329	0.361407	0.491896	0.51262	0.97911	0.434609	1.50224	0.337017	0.973057	1.13659	0.962326	0.90731	1.39178
HTS1	0.812455	0.517848	0.424171	0.430225	0.298233	0.556018	0.38371	0.470909	0.383308	0.526494	0.739104	0.864917	1.65992	1.43181
OLA1	0.806607	0.531632	0.267034	0.258379	0.474509	0.764293	1.10416	0.406261	0.575416	1.11307	0.69103	2.16831	1.02834	1.04875
URA2	0.70903	0.394693	0.228567	0.292292	0.307409	0.827371	1.4742	1.02615	1.31248	1.38945	1.07733	1.23821	0.862477	1.47607
TIF4631	0.939231	0.345167	0.227165	0.25513	0.270961	0.555091	0.720184	1.19773	1.01747	1.13529	1.40908	1.01735	0.891905	0.806162
FRS2	0.867765	0.541994	0.351977	0.329335	0.296893	0.326842	0.839343	1.07191	1.23908	1.30925	1.82063	0.970138	1.03958	1.15617
VAS1	0.882157	0.648388	0.42524	0.420078	0.340403	0.693975	0.691032	0.673563	1.35101	1.37492	1.02397	1.23064	1.30653	2.18076
MAP1	0.864285	0.467259	0.322682	0.303689	0.341409	0.497693	0.653664	1.30824	0.879354	0.829189	0.605075	1.12562	0.923427	1.41778
MES1	0.798854	0.409736	0.281568	0.31578	0.286316	0.541755	0.52508	1.04251	0.947893	1.18506	1.00539	0.997309	1.12211	1.43198
TIF5	0.885246	0.420078	0.328348	0.269044	0.340463	0.460581	0.529766	1.20564	0.908032	1.48676	0.918304	1.32412	1.03231	1.24037
GRS1	0.908748	0.682966	0.430383	0.339884	0.276569	0.704509	0.729219	0.73403	0.719836	0.897757	0.53768	1.21511	1.07995	1.54065
RPL10	1.14995	1.01962	0.413404	0.340075	0.364874	0.914209	0.562666	0.912454	1.22708	1.12146	0.803928	0.932403	0.941157	0.765757
TEF2	1.03599	0.86891	0.488517	0.379172	0.372287	0.636535	0.878762	1.01073	1.03592	0.929786	0.875989	0.743901	0.912431	1.01977
CYS4	0.852436	1.03322	0.528177	0.41306	0.485813	0.646035	0.710157	0.965107	1.30227	1.20273	0.756968	1.15647	1.20059	1.04141
PDC5	1.00952	0.952597	0.802261	0.392418	0.456744	0.482508	0.930051	0.73271	1.24584	0.961492	0.859325	0.857498	1.18617	1.08887
PAB1	0.824743	0.620804	0.412574	0.383915	0.372636	0.447656	0.706006	0.836579	0.684433	0.847697	0.849879	0.77608	0.815914	0.859035
SSZ1	0.700454	0.508157	0.36313	0.368618	0.38946	0.59942	0.865178	0.980323	0.855826	0.978566	0.700326	0.493616	0.819977	0.824017
RPS5	0.951723	0.654833	0.355219	0.294284	0.274561	0.950687	1.56309	0.974199	0.936716	0.934159	0.912949	0.99237	0.674797	0.638529
SES1	0.781229	0.587557	0.33074	0.326876	0.294675	0.760348	1.043	0.886241	0.741084	0.806637	0.786745	1.08639	1.08591	0.688644
HOM3	0.885771	0.336985	0.417361	0.691811	0.527218	0.890628	0.665657	1.06701	0.846412	0.556305	0.715302	0.845467	1.29958	1.03643
GCD11	0.901874	0.594984	0.508727	0.437953	0.655397	0.644627	0.797616	1.04417	1.27724	0.78297	0.63288	0.951713	1.1948	1.01117
ZUO1	0.75527	0.611854	0.427055	0.41822	0.415955	0.693132	0.984025	0.678885	0.715788	0.924254	0.99546	0.923745	2.15357	1.11064
KAP123	0.998749	0.377041	0.245495	0.356372	0.410566	0.794275	1.22041	0.780926	1.39021	0.891726	1.09886	1.01138	1.32207	1.10839
ARB1	0.846561	0.41321	0.36651	0.388197	0.49192	0.733693	1.18363	0.69529	0.834774	0.854773	0.844484	0.748538	1.07549	1.03007
ALA1	0.816044	0.559694	0.492533	0.522803	0.408371	0.77628	0.737183	0.815978	0.829615	0.648132	1.1243	0.679407	0.962154	1.48237
KRS1	0.767389	0.489658	0.372983	0.430399	0.363725	1.2292	0.78501	0.803908	1.03467	1.02322	0.771812	0.753095	1.03612	1.57604
ILS1	0.897848	0.583605	0.404087	0.462195	0.389437	0.959442	0.780892	1.26098	0.969662	1.0634	1.19868	1.35959	1.18173	0.93806
GIS2	0.805734	0.449312	0.301868	0.376107	0.500415	1.37258	1.23648	1.23042	1.04764	0.661413	0.989866	1.12543	1.00889	1.08299
GAS1	0.929208	0.672409	0.472362	0.419855	0.329418	0.638947	0.949347	0.994231	1.17492	2.10386	2.68564	1.9763	2.64587	2.2946
THR4	0.86525	0.600512	0.457195	0.562361	0.487521	0.896538	0.482607	1.07914	0.951514	1.93157	3.4963	1.42036	1.24595	1.39604
GCV2	1.04127	0.986269	0.912477	0.644863	0.442591	1.11417	0.570626	2.07495	1.80828	2.86136	1.82049	2.02283	0.628133	0.916755
YDR341C	0.808034	0.472854	0.280612	0.314965	0.364419	0.914369	0.391305	1.01615	1.25352	1.79521	1.41337	1.63277	0.945707	1.14921
ADE6	0.787042	0.424139	0.279982	0.309866	0.318634	0.757985	0.591651	1.28188	1.13575	1.49384	1.10648	1.83005	0.742519	0.710974
ADE4	1.02954	0.440812	0.326039	0.38491	0.421719	1.14721	0.573012	1.1603	1.74051	1.76281	2.50087	1.95416	1.13328	0.736956
MET6	0.968578	0.636263	0.604089	0.667269	0.851692	1.15552	0.667981	1.51167	1.5007	1.04249	1.57308	1.54631	0.798076	0.860118
ADE13	0.902071	0.637799	0.433022	0.456279	0.600969	0.996852	0.593233	1.57648	1.52393	1.44129	1.72014	1.3411	0.89338	0.786747
FAA1	0.843998	1.46506	1.24051	0.908928	0.863433	0.597003	0.63806	0.506665	1.17455	1.05365	1.8608	5.13094	0.973088	1.0555
KAP95	0.995139	0.729691	0.689183	0.726971	0.827183	0.582336	1.08964	0.590965	0.963956	1.14828	1.20817	3.14556	1.11936	1.02896
LYS1	0.856991	0.768183	1.05004	1.29844	0.902148	2.12005	0.158442	1.03889	0.865677	1.04024	1.27299	1.13929	2.49112	1.62392
LYS20	0.770938	0.642083	0.652296	1.01791	0.791951	2.92852	0.247684	0.811203	0.99767	0.923211	1.05608	1.27562	2.12049	0.449719
LYS21	0.846518	0.671401	0.63904	0.726992	0.559222	1.08296	0.399413	0.834866	0.931828	0.917151	1.17476	1.28133	2.01254	0.464394
TRP2	0.890542	0.505012	0.477698	0.611328	0.562224	1.38782	0.519488	0.528569	0.94848	0.644366	1.34246	1.05757	1.35992	0.695719
LYS2	0.686978	0.440476	0.478501	0.691627	0.508291	1.19777	0.303734	0.734622	1.1545	0.947401	1.18491	0.91709	2.57428	1.0991
HIS7	0.989584	0.432456	0.564565	0.752803	0.731444	1.29942	0.344773	0.765445	0.753306	1.11262	1.2592	1.20912	1.50274	1.16937
CPA2	0.782769	0.367404	0.528522	0.669624	0.47656	1.32024	0.275372	0.969661	1.09702	1.00615	1.1504	1.09586	1.20316	0.870255
ARG1	0.64595	0.86097	0.636447	0.718708	0.656399	2.47183	0.284858	0.45473	0.669611	0.576611	0.789548	1.03953	1.26889	1.29555
ZWF1	1.03783	1.38252	1.43792	1.42267	1.71065	0.451734	0.430769	1.33389	1.19791	1.17298	0.981364	1.16791	1.9186	1.47802
PDC1	1.44161	1.77263	3.29255	0.735766	0.798637	0.633097	1.46481	0.814618	1.13706	1.02637	0.863078	0.77548	1.20254	1.28215
ADH2	1.14729	1.35328	2.88986	0.510656	1.85531	0.655575	1.08607	0.948744	1.06792	1.10633	0.561018	0.934121	0.928684	1.26002
CAR2	1.53126	1.61378	1.70103	1.45789	0.865785	0.625431	1.905	1.52217	1.26823	1.86656	1.03039	1.3349	1.21613	2.0178
TDH3	1.68163	2.17509	1.98269	1.29455	2.04934	1.29435	1.4359	0.949418	1.02091	0.927369	0.908471	0.982412	1.06365	1.08249
TDH1	1.92267	2.22092	2.33273	2.02879	2.26487	1.28767	1.26896	0.93765	1.12111	0.893333	1.03351	1.1267	1.07073	1.09692
ENO2	1.69679	2.82972	1.39812	0.820801	1.41383	1.0695	1.04031	1.00319	1.03763	1.02838	0.950729	0.974218	1.00045	0.934969
TDH2	1.63854	1.60419	1.45661	1.06641	1.41549	1.20974	1.14413	0.932603	1.03543	0.856732	0.912977	0.94154	1.0298	1.04153
PGK1	2.39542	1.54367	1.5873	1.64198	2.08305	0.660953	0.986223	1.55952	0.963597	1.00974	1.13496	1.31366	1.21015	1.15881
YDR098C-B	1.37351	1.44857	1.30744	1.27198	1.64533	0.916037	1.01746	0.823636	0.929543	0.660753	1.11376	1.32919	0.757913	0.77223
YDR365W-B	1.40341	1.65764	1.65485	1.31311	1.2417	1.18761	1.25704	0.849095	0.935897	0.681624	1.11377	1.24878	0.758871	0.777641
SAC6	0.973776	1.46937	1.48502	1.40334	1.50531	0.666137	0.934847	0.891977	1.18081	1.04937	0.801679	1.40679	0.739495	0.811571
GPD1	1.0776	1.58438	1.03371	1.03545	1.73618	0.666787	1.5279	0.692175	1.3024	1.2769	1.13726	1.48859	1.202	1.08801
GFA1	0.976946	1.27451	1.29284	1.33437	1.103	0.707894	1.13713	1.03575	0.831626	1.00625	0.936814	1.85128	1.48828	0.86841
HYP2	1.19495	1.3968	1.84285	0.884904	1.15423	0.706325	1.52799	1.36425	0.884005	0.759123	1.22359	0.814923	0.841273	0.919434
GVP36	1.22896	1.68496	1.22871	0.952164	1.14945	0.879498	1.3982	1.04868	0.628488	1.00955	1.24855	0.852482	1.33649	1.21458
ADH1	1.48164	1.97647	1.12924	0.834566	0.771487	1.12483	1.57425	1.06746	0.995759	1.12004	0.776233	0.997075	1.17786	1.35997
GET3	0.98227	1.01503	1.35697	1.06165	0.976751	0.895034	1.04354	0.574372	0.771249	1.11452	0.907171	0.658306	1.18273	0.727316
CDC19	1.39581	1.1625	0.986727	0.83855	0.997021	0.803097	1.20475	0.840483	0.937617	0.939195	0.830824	0.714374	0.968195	0.929982
SEC23	1.14789	1.14224	1.13363	0.94159	0.840772	0.649771	1.01638	1.20682	1.00275	1.30653	1.11107	0.8496	0.847415	0.797238
KEM1	1.08739	1.09287	1.08262	1.03891	1.04724	0.82227	1.07706	0.881009	1.03624	1.37125	0.82969	0.795398	1.30722	0.989014
VPS1	1.03353	1.14159	1.1568	0.984487	0.92752	0.733602	0.918062	0.78257	1.18399	1.54414	0.735426	1.21868	1.55591	1.04668
TFP1	0.819156	0.901807	1.68072	0.686536	0.848781	0.927853	1.08739	0.969243	0.923556	1.12188	1.19091	0.967755	1.03189	1.53757
ABP1	1.03214	0.982367	1.10425	0.998355	0.826729	0.597556	0.688679	1.10918	0.913468	1.04253	1.36918	0.803808	0.943017	1.48656
CDC48	0.847983	1.29604	1.14991	1.03424	1.26644	0.781892	1.06094	0.923876	1.01352	1.006	1.05744	1.15637	1.59303	1.17914
ACT1	1.06474	1.53892	0.997383	0.953114	0.93786	1.12852	1.16155	0.85101	0.976791	0.983391	0.871016	1.36479	1.44093	1.36718
VMA2	0.848339	1.31156	1.07475	0.898102	0.680834	0.956143	1.26205	0.833715	1.03098	0.797952	0.932176	1.07678	1.02322	1.37801
HSP60	0.938944	1.06471	1.11531	1.25009	1.1691	0.669594	0.886334	0.869644	0.927033	0.623568	1.07506	0.824294	1.33445	1.52338
SRV2	1.03448	1.13645	0.968594	0.955685	0.783411	0.777432	0.946675	0.828399	1.12504	0.850794	0.983815	0.817115	1.58686	1.44957
ATP2	0.888337	1.30643	0.986906	0.75325	1.07662	0.85713	1.32018	1.28393	1.28187	1.04673	1.17176	0.992371	1.74015	1.82635
ARC1	0.921187	0.98964	0.830398	0.798951	0.849825	0.908667	1.01672	1.48135	0.957798	1.07313	1.6636	0.970795	1.20014	1.6442
PGI1	1.17077	1.01872	0.968438	1.01578	1.19552	0.996216	1.04615	1.22735	1.05243	1.06213	1.32949	1.11608	1.3645	1.49661
EGD2	0.948186	1.63592	0.990267	1.10543	1.38675	1.61728	1.17691	0.843459	0.891343	0.869949	0.738682	0.664577	0.77215	1.29452
TPD3	1.06369	1.06874	1.03167	1.06336	1.23634	1.1738	0.945523	0.709359	0.95527	1.00988	1.39122	1.12339	0.432733	1.34443
PUP3	0.858433	1.21405	1.23108	1.17754	1.48324	1.1183	1.05651	0.699327	1.04675	1.29328	1.48395	1.04111	0.706491	1.40724
BMH2	0.981918	1.44728	1.18292	1.24167	1.16286	1.21374	1.36651	1.02067	1.08158	1.31133	1.24113	1.25412	0.996967	1.87629
CHC1	1.16257	1.5279	1.28323	1.20812	1.14442	1.00324	1.17654	1.04385	0.963263	1.75248	1.57337	1.78541	1.55129	1.42449
VMA6	0.796068	1.03011	1.10157	1.0001	0.947572	1.30465	1.00558	1.07241	1.0027	1.61271	1.62086	1.276	0.927225	1.00221
ARG4	0.769187	0.626487	1.00984	1.26258	0.870632	1.61978	0.432302	0.707755	0.824903	1.41829	1.0903	1.498	1.1294	1.29796
LEU4	0.828472	0.875489	0.828056	0.97668	0.747841	2.20858	0.777757	0.901904	0.9243	1.20604	0.997396	1.35179	1.41866	1.49929
VMA13	0.894929	0.98932	1.09534	1.089	0.935594	1.73766	0.689047	0.609284	0.708659	0.590901	1.64039	1.01804	1.87279	1.51091
SER1	0.917068	0.915265	1.26401	1.2794	1.21725	1.8234	0.656736	1.53209	1.92885	1.04847	0.836411	1.29673	1.80095	1.63118
GLC7	0.989373	1.26492	1.03552	0.934777	1.05186	0.916646	0.855128	0.694541	1.15659	1.64494	1.30205	1.26988	2.93271	1.02851
DUG1	0.911328	1.07543	1.28448	1.24925	1.02221	0.778391	0.811981	0.980104	1.06478	1.63534	1.17778	1.18377	2.40016	0.883286
PYC2	0.981814	0.885675	0.687115	0.752354	0.910444	1.05516	0.673859	0.835776	1.46531	1.44304	1.39628	1.66061	1.89297	2.43505
HOM6	0.836045	1.03347	1.04877	0.971139	1.04955	1.13328	0.995006	1.12113	0.95162	1.4127	1.35618	1.47351	1.95496	2.40675
TRR1	0.952656	1.05905	1.15116	1.12648	0.689808	0.882061	0.540861	1.20679	1.18377	1.34805	1.10997	1.32609	1.64975	1.63133
AAT2	0.753491	0.936171	1.20278	1.11348	1.0798	0.901335	0.622234	1.55791	0.843846	0.935184	1.03889	1.42443	1.98113	1.32391
TUB1	0.942614	0.973011	1.15765	0.878994	0.895492	0.893285	0.812077	1.12205	0.88324	0.991182	0.956727	1.70307	1.39885	1.80205
MDH3	0.855896	1.08153	1.16374	1.15728	1.39468	0.932229	0.779301	0.841356	1.31391	1.18179	0.83204	0.966451	2.25693	1.92902
LPD1	0.913292	0.98769	1.00684	0.899978	0.973217	1.20045	0.875327	1.08949	1.65496	1.07193	0.904917	1.00921	1.83943	1.65003
GUS1	0.941154	0.901447	0.871076	0.860456	0.775465	0.931449	0.808275	0.909554	1.26291	1.33819	0.86392	1.24302	1.95196	1.14672
ASN1	0.729534	0.813508	0.684695	0.57533	0.45736	1.85828	0.910379	0.964995	1.0981	0.851921	0.835255	1.1116	2.87207	1.36504
CCT8	0.885161	0.702889	0.754943	0.772364	0.636748	0.697989	0.906898	0.849974	0.629545	1.28282	0.915948	0.570274	2.11515	1.03857
VMA4	0.793937	0.991041	0.897955	0.79573	0.719007	0.885539	0.993495	1.09829	1.17293	0.701911	0.990044	0.455445	1.8669	0.998549
PDR5	0.788932	0.88237	0.799588	0.695571	0.551061	0.645827	0.825522	0.693048	0.760463	0.86044	0.905596	0.76188	2.37933	2.72996
ERG13	0.8671	0.792398	0.832128	0.77139	0.669761	0.619745	0.76661	0.535833	0.993602	0.92605	0.437513	0.931741	1.26553	1.23642
SPT16	0.934379	0.845551	0.879552	0.995915	0.888739	1.00183	0.996994	0.539415	0.825528	1.13373	0.674857	0.914244	1.09425	1.96292
VMA5	0.908127	0.892123	1.22377	0.970951	0.680165	1.01038	0.910392	0.623307	1.43108	1.51836	0.804696	0.803947	0.756723	1.48798
SRP1	0.920041	0.905401	0.944908	0.987634	0.927637	1.20853	1.16946	0.797927	1.10728	1.09402	0.692577	1.1503	0.782231	1.18705
SPT6	1.08644	0.926578	0.801297	0.677563	0.72533	0.938228	1.07386	0.754182	0.951294	0.957704	0.63836	0.836244	1.54553	1.31621
PFK1	0.764008	0.69703	0.642287	0.57758	0.656688	1.15086	1.26425	1.03134	1.0731	1.31816	0.832535	1.009	1.42159	1.34292
RPB2	0.949956	0.855934	0.69585	0.696894	0.745786	0.843961	0.856004	1.28594	1.71938	0.598301	0.873815	0.664593	1.01918	3.0062
SHM1	0.973373	0.771831	0.708036	0.769435	0.905009	0.87929	0.765458	1.41358	1.33008	0.983626	1.24787	0.833646	0.95856	1.95556
BAT1	0.932131	0.651172	0.572346	0.611508	0.498233	1.0673	1.00457	1.45127	1.64715	0.946825	1.04788	0.641731	1.30658	1.33961
HTB2	1.04303	0.870773	0.690328	0.680509	0.537023	1.41196	1.17645	0.905782	0.818248	1.32312	1.22274	0.680433	0.937422	1.1491
ARO8	0.846583	0.784636	0.59192	0.642744	0.39043	1.38451	0.974482	1.107	1.02952	1.16009	1.29948	0.858691	0.859456	1.01862
GLT1	0.970396	1.23654	1.5698	1.88917	1.92858	2.42707	1.32408	0.845447	1.04244	1.45879	1.0339	1.28204	1.93347	2.67763
WTM1	0.905252	1.44171	1.61709	1.35402	1.95011	2.00116	2.83117	1.20327	0.793544	1.06334	0.635308	1.19786	2.27095	1.96707
SGT2	0.839992	0.871249	1.14174	1.372	2.11238	1.77041	1.66226	1.27209	0.546102	1.03809	0.961928	1.10646	2.16417	2.39733
FUM1	1.0921	1.13557	1.27136	1.36535	1.51624	1.46854	1.99057	1.31925	0.837853	0.879538	0.846849	1.48821	1.4937	2.79
PDC6	1.04193	0.984873	1.22447	1.36323	2.15617	1.44526	2.14705	0.778487	1.62525	0.911513	1.01161	1.15061	1.64335	1.89483
HSP82	0.998956	1.80686	1.7116	1.62462	1.75305	1.07629	2.13351	0.751694	0.954057	0.958314	0.819935	1.03995	1.28278	1.53294
PDB1	0.995536	1.46005	2.194	1.62149	1.14928	1.67246	1.26244	0.949782	1.29543	0.918146	0.670212	1.24668	3.51354	1.22276
UGP1	1.17079	2.3509	1.60417	1.40155	1.69565	1.27155	1.8189	1.26489	1.17282	1.33823	1.20077	1.65045	1.85685	1.97149
ATP1	1.01769	1.35099	1.8122	1.7069	1.60206	1.26994	1.23277	0.996786	1.22767	0.976044	0.981248	1.23055	2.29781	2.00551
UBA1	1.08898	1.33866	1.58267	1.52969	1.56223	1.17185	1.24345	1.20222	0.974674	1.09731	1.15123	1.18734	1.98585	2.35397
PIL1	1.02373	2.35257	1.53812	1.41475	1.32866	1.55046	1.47933	1.32239	1.35068	1.1389	0.943763	1.04251	3.57217	2.50002
SSE1	0.858648	0.81213	0.982965	1.39904	1.72408	1.46654	1.72221	0.958078	1.02077	0.720412	0.815739	0.987453	3.09681	2.10437
MCK1	1.06025	1.1164	0.981426	1.07089	0.914366	1.09175	1.1747	0.969297	1.1201	0.562413	0.797147	1.16251	2.54656	1.76834
APE3	0.898605	1.04282	1.02274	0.909512	1.1144	0.884306	1.43365	1.23676	1.08887	1.11124	1.10598	0.561928	1.96167	3.34389
OYE2	0.780155	0.750209	0.745705	0.635694	0.774217	0.699008	1.92643	1.32262	0.744276	1.02821	1.16511	1.15943	2.84537	2.4159
PMA1	2.55678	1.40687	1.34853	1.50966	1.07131	0.970522	0.753115	1.03648	1.05846	1.10478	1.70405	1.4391	2.25712	2.60847
YCP4	1.11073	1.44721	1.37867	1.5603	1.49692	1.24575	1.61525	0.868982	0.629916	1.29024	1.26196	1.26565	2.65686	5.05246
GDI1	1.06938	1.48477	1.43985	1.31351	1.03747	0.946915	1.82133	1.51403	0.746944	0.954802	1.04852	1.46434	3.78281	5.52795
ECM33	1.06569	1.19614	1.06711	1.08169	0.677007	1.07095	1.18161	1.56206	0.739817	1.2469	2.56006	1.8892	2.89587	3.49273
SSC1	0.89003	1.39886	1.11449	0.838473	0.822244	0.942849	1.56006	0.717769	1.13231	1.00333	1.65206	1.88239	1.58865	2.69325
NOP1	1.05004	1.72712	1.00535	0.978019	1.1283	1.42605	1.56529	1.15712	0.601213	0.827558	0.773396	0.965537	0.844354	0.446021
YDJ1	0.782917	0.544357	0.642755	0.968712	0.934264	1.13391	1.41769	1.01045	0.784276	1.04146	0.739646	0.800782	1.13018	0.548803
CDC33	0.827463	0.723748	0.647949	0.69029	0.838959	1.85624	1.27951	1.43756	1.48909	0.903096	0.850088	0.920111	1.33613	0.652796
SUB2	0.891194	1.03057	1.07646	0.775728	0.707947	1.02717	0.889081	1.18985	1.0537	1.06159	0.70442	1.05258	1.11444	0.793522
HTA2	0.956889	1.10889	1.0672	0.792168	0.69109	1.72443	0.992388	1.17705	0.722535	0.857864	0.718064	0.880127	0.923144	0.901699
ASN2	0.766086	1.01867	0.791929	0.67354	0.692681	1.30611	0.825603	0.743555	0.896256	0.78901	0.652917	0.937485	0.933022	0.731311
SAH1	1.20618	0.975404	0.680236	0.77259	0.99788	0.953436	1.65739	0.767005	1.12559	0.770517	1.07845	0.869465	0.608324	0.827895
RPL14A	0.856914	1.04405	0.832862	0.846114	0.984773	0.977936	1.16942	1.03329	1.0823	0.999175	1.04356	0.836255	0.740414	0.735785
YDR261C-D	0.753682	0.666875	0.689162	0.703264	0.735215	0.844629	0.933108	0.825518	0.952795	0.672412	1.12077	1.17047	0.783535	0.789303
FKS1	1.064	0.829891	0.608039	0.623235	0.358882	0.740271	0.7439	1.08856	1.0455	1.25852	2.10387	1.62211	1.33428	1.36183
TUF1	0.891901	0.897524	0.793574	0.585814	0.647414	0.715933	1.12348	1.47611	1.01618	1.30566	2.852	1.73361	1.40904	1.10594
HXK2	0.834781	0.913131	0.667992	0.597432	0.618133	0.547641	1.65978	1.0965	0.876898	1.20663	1.68563	1.4177	1.23592	1.11886
FAS1	0.966178	1.02488	0.780103	0.635138	0.51704	0.687932	1.58929	1.01207	0.901511	1.19295	1.2042	1.44105	0.860037	0.961212
SEC21	0.865001	0.984224	0.996839	0.846503	0.745958	0.728399	0.972166	0.862386	1.04927	1.22738	1.48051	2.24236	1.18477	1.14779
ACC1	0.944587	1.00589	0.853815	0.747391	0.72912	0.814657	1.73402	0.744658	1.10553	1.3406	1.35594	1.95426	1.06466	1.16464
TPI1	1.00834	1.10155	0.989822	1.08039	0.525898	0.865226	1.10551	1.29178	0.984384	1.12828	1.49486	1.70848	1.17143	1.09474
FAS2	1.06968	1.00038	1.01901	1.11491	0.732439	0.707694	0.994414	1.21472	0.952835	1.04936	1.25919	1.62222	0.775408	1.03642
HXT3	1.01886	1.50665	0.49787	0.66285	1.00958	1.16759	1.77002	0.651328	1.16974	1.0742	1.63518	1.71545	1.13982	1.00247
SAM2	1.069	1.51788	1.31186	1.08642	1.28329	0.932492	3.01936	0.888236	1.03424	1.48977	1.46088	1.51562	0.759786	0.721908
IPP1	0.959993	1.13654	0.946608	0.834331	0.877425	1.46402	1.96092	1.70812	0.885897	1.16912	0.882983	1.38779	1.07698	1.09965
QCR2	0.866849	1.27782	0.990419	1.03026	1.78421	1.6039	1.63778	1.3956	1.07974	1.42496	1.63869	2.82907	1.49441	1.31861

## Sheet: input_Spombe
R0	R10	R30	R60	R120	R180	P0	P10	P30	P60	P120	P180
SPAC1002.03c	1	1.04972	0.818702	1.34268	0.965708	0.87831	1	1.18122	1.14235	1.15189	0.91093	1.00248
SPAC1002.07c	1	0.932554	1.43052	2.36205	2.1666	1.63882	1	1.31249	1.40109	1.40337	1.65791	1.48166
SPAC1002.09c	1	1.27549	0.810031	1.25415	1.24019	0.772053	1	0.986352	0.886164	0.911207	0.82406	0.957752
SPAC1002.12c	1	0.9689	1.26505	1.3269	1.49187	1.12664	1	0.983286	0.990719	0.978173	1.08596	1.08205
SPAC1002.17c	1	1.69391	2.75171	1.56863	3.10694	0.849418	1	1.31216	0.942767	1.54638	1.56111	1.48328
SPAC1002.18	1	1.52773	1.52819	0.80075	1.18562	0.701871	1	1.79476	1.39934	1.2238	1.2739	1.30176
SPAC1006.01	1	1.74333	2.56128	3.30823	2.14498	1.33199	1	1.1359	1.03386	1.25097	1.01619	1.2421
SPAC1006.05c	1	1.13327	0.990695	1.63127	1.46178	1.132	1	0.566334	0.576697	0.633378	0.428931	0.725233
SPAC1006.07	1	0.749519	0.557358	0.350245	0.494053	0.62655	1	1.05024	1.04815	1.03873	1.00846	0.929795
SPAC1039.02	1	1.31659	1.00343	1.22782	0.968748	1.01179	1	1.07044	1.08767	0.979659	1.09417	1.41653
SPAC1039.06	1	0.960826	0.993204	0.661851	1.67869	1.0969	1	1.40594	1.1592	1.36499	1.40088	1.79608
SPAC105.02c	1	0.921482	1.10624	1.41542	1.36683	1.04285	1	1.01309	1.00477	0.747092	0.695347	0.833778
SPAC1071.02	1	1.18859	0.919822	1.18485	0.669432	0.896782	1	0.884992	1.14645	1.20049	0.827655	0.891014
SPAC1071.06	1	0.897352	0.865131	1.16417	1.05984	0.856502	1	0.714988	0.891385	0.877415	0.989087	1.07151
SPAC1071.07c	1	1.31615	0.832598	0.645012	0.644511	0.518546	1	1.14552	2.40535	1.58104	1.47666	2.12223
SPAC1071.08	1	1.15677	0.693175	0.42296	0.361894	0.558735	1	1.04709	1.12928	0.996208	0.899292	0.998458
SPAC1071.10c	1	1.08778	0.988781	0.67526	0.996618	1.15564	1	0.990675	1.02936	0.941697	0.918396	1.00645
SPAC1093.02	1	1.4363	1.08072	0.861188	0.965823	0.779409	1	1.11098	1.0867	0.914727	1.11809	1.12224
SPAC1093.05	1	0.425808	0.339239	0.355617	0.445154	0.805332	1	1.18915	1.24227	1.20225	0.687348	0.660571
SPAC10F6.02c	1	0.810018	0.992499	1.26835	1.0644	0.972645	1	0.800136	0.921242	1.23297	1.00209	0.887359
SPAC10F6.03c	1	0.621378	0.272199	0.351304	0.526694	0.731291	1	1.0248	0.969901	0.992565	0.866076	0.909362
SPAC10F6.06	1	2.35289	2.58841	4.11848	3.74659	1.968	1	0.859053	0.812333	0.969955	1.31607	1.35102
SPAC10F6.08c	1	1.01048	1.0861	0.938851	0.862299	0.818553	1	0.857311	0.866359	0.789817	0.79996	0.633844
SPAC10F6.09c	1	0.673038	1.43527	1.64574	2.09607	1.58264	1	1.1681	1.30353	1.25744	1.48852	1.10835
SPAC10F6.10	1	0.571287	0.325049	0.558368	0.733789	0.83743	1	1.16981	0.909809	0.877635	0.534971	0.809031
SPAC10F6.13c	1	1.03148	0.919442	1.41818	1.55293	0.904909	1	1.00306	1.17618	1.09106	1.22906	1.26511
SPAC10F6.15	1	1.07857	1.33501	1.40062	2.0054	1.85756	1	1.10291	1.31149	1.3083	1.27882	1.22314
SPAC110.04c	1	1.24055	1.1148	1.06745	1.44619	1.32489	1	0.917323	0.954742	1.01872	0.945548	0.9938
SPAC1142.04	1	0.480749	0.231874	0.50166	0.456561	0.580235	1	0.954095	0.930087	0.918966	0.883822	0.818494
SPAC1142.06	1	1.09002	1.07373	1.15495	0.91631	0.978561	1	0.998333	1.05256	0.981225	1.07586	0.860064
SPAC1142.07c	1	0.968254	1.06894	1.44987	1.23511	0.832227	1	1.38628	1.05585	1.43538	1.21818	1.11657
SPAC11D3.02c	1	1.02901	0.47679	0.321508	0.56827	0.458044	1	0.74991	0.753223	0.74969	0.895586	0.780765
SPAC11D3.04c	1	1.44044	1.08252	0.904416	0.476017	0.57892	1	1.12356	0.821585	0.956835	0.835021	0.789534
SPAC11D3.07c	1	1.73613	2.63646	2.23543	1.46416	1.70478	1	1.10537	0.905014	1.19431	0.48335	1.00092
SPAC11D3.15	1	1.10361	1.25122	0.93544	1.32917	1.74949	1	0.94179	0.778725	0.604762	1.10907	0.929042
SPAC11E3.02c	1	1.41816	1.55661	1.93019	1.02628	0.982109	1	0.54651	0.750398	1.13975	0.837187	0.537976
SPAC11E3.04c	1	1.36971	1.16702	1.22762	1.25992	1.23668	1	1.01096	1.07994	1.07239	1.1258	1.02132
SPAC11E3.07	1	1.40799	1.2556	1.16755	1.11097	1.08052	1	1.06277	0.788089	1.11984	1.03159	1.06548
SPAC11E3.11c	1	1.08826	0.747835	0.736278	0.699442	0.735332	1	0.711926	0.972199	0.498062	0.622191	0.806515
SPAC11E3.13c	1	0.747861	0.559705	0.409313	0.86814	1.60859	1	1.4101	1.63936	1.11102	1.22866	0.929042
SPAC11E3.14	1	3.80613	3.33257	1.87876	1.45666	0.952233	1	1.27637	1.73999	1.6186	1.55017	2.1929
SPAC11E3.15	1	1.25618	0.760474	0.709704	0.682737	0.599325	1	0.994781	0.889802	1.02822	0.969176	1.23872
SPAC11G7.02	1	1.01969	1.36136	0.9828	1.34145	1.3925	1	0.95271	1.02856	0.93125	0.782229	0.993741
SPAC11G7.03	1	0.887354	1.23837	1.38078	1.50029	1.08115	1	1.07301	1.01511	1.07123	1.0628	1.20859
SPAC11H11.06	1	1.16242	1.75046	2.08987	1.46655	1.23858	1	1.31734	1.35484	1.1305	1.23577	1.42897
SPAC1250.01	1	0.797541	1.17084	1.02437	1.1147	1.05853	1	1.24613	1.06243	1.01341	0.873604	0.904524
SPAC1250.05	1	1.36109	0.574374	0.505358	0.730112	0.855147	1	1.2276	1.10044	0.890406	1.03379	0.809564
SPAC12B10.02c	1	1.59225	1.2671	1.09525	1.33719	0.924677	1	1.61953	1.35322	1.16671	0.952851	1.52893
SPAC12B10.03	1	1.06689	1.23281	1.40654	1.31848	1.21363	1	1.08713	1.39805	0.801167	0.731587	1.19502
SPAC12B10.06c	1	1.27808	1.15442	1.03315	1.24554	0.914521	1	1.15345	1.13578	1.19431	1.27882	1.05927
SPAC12B10.07	1	1.01062	1.03365	1.33199	1.31509	0.984629	1	1.04834	1.0247	1.15907	1.22599	0.955667
SPAC12B10.16c	1	1.07222	1.48474	1.48244	1.23804	1.45265	1	0.616546	0.737207	0.786191	0.713294	0.534517
SPAC12G12.02	1	0.395218	0.259615	0.37714	0.528474	0.714838	1	1.03759	1.10356	0.970878	1.1216	0.651936
SPAC12G12.03	1	1.13264	1.43738	1.36526	1.34613	1.13415	1	0.985479	0.763271	1.0587	0.941423	1.02453
SPAC12G12.04	1	1.22034	1.23964	0.841201	1.56487	1.57684	1	0.955047	0.944501	0.900564	0.861553	1.0608
SPAC12G12.05c	1	1.32013	0.726298	0.474743	1.02231	0.674288	1	1.39112	1.30776	1.06518	1.15674	1.05121
SPAC12G12.06c	1	0.677902	0.382225	0.442622	0.627779	0.755226	1	1.30971	1.22679	1.20175	0.783117	1.15431
SPAC12G12.07c	1	0.966338	1.33629	1.23909	1.32832	1.13803	1	0.695162	0.820693	1.1432	0.879873	1.06307
SPAC12G12.13c	1	0.79793	0.692757	1.05536	0.742961	0.776824	1	2.36119	2.50417	1.46272	2.2354	1.10095
SPAC139.02c	1	1.4465	0.555147	0.447707	0.923124	0.631098	1	0.961101	1.09236	0.909559	0.84275	0.894749
SPAC139.05	1	27.116	91.5887	172.755	16.4259	3.67193	1	2.30691	12.2679	25.5454	31.4159	29.17
SPAC139.06	1	0.887008	0.760187	0.688861	0.653548	1.16563	1	0.823895	0.979706	1.13975	0.887971	0.817245
SPAC13A11.02c	1	0.877888	0.764378	0.396519	0.655287	1.16134	1	0.9912	0.886466	0.803057	0.80931	0.714967
SPAC13A11.05	1	1.1696	1.44209	0.974005	1.09662	1.32817	1	1.1154	1.17249	1.06117	1.01891	0.943597
SPAC13C5.01c	1	1.49121	2.42778	2.91872	1.6886	1.44125	1	0.842219	1.23598	1.38914	1.69692	1.7268
SPAC13C5.04	1	4.38109	6.02192	8.58466	5.4478	2.24095	1	1.12001	1.17456	2.11126	2.69263	3.08954
SPAC13C5.05c	1	0.968345	1.41849	1.19921	1.29556	1.25693	1	0.917943	1.19722	0.978192	1.06994	1.00775
SPAC13D6.03c	1	0.761479	0.473391	0.485997	0.807253	0.96418	1	1.41523	1.14055	1.39831	1.40186	1.21863
SPAC13F5.02c	1	0.693379	0.615476	0.920191	1.1837	0.937089	1	0.665946	0.630991	0.844504	0.85255	0.750172
SPAC13G6.02c	1	0.880222	0.745097	0.394367	0.509942	0.612977	1	0.840666	0.866261	0.847879	0.718256	0.745178
SPAC13G6.06c	1	1.0326	0.792704	0.992165	0.808859	0.817953	1	1.05517	0.978777	1.00247	1.04349	0.895072
SPAC13G6.09	1	0.91121	0.584913	0.726598	0.8977	0.986724	1	1.08395	1.23297	0.847697	1.03622	1.2293
SPAC13G6.10c	1	0.665629	0.558291	0.354282	0.966502	1.38706	1	1.35079	1.01814	1.17442	1.03667	0.990857
SPAC13G6.14	1	1.1328	0.501535	0.56831	0.814333	0.709201	1	0.962781	1.03821	0.971558	0.790757	0.741638
SPAC13G7.02c	1	7.29975	18.4157	13.8563	7.99606	7.51375	1	0.757676	1.13578	2.23321	2.32047	2.51513
SPAC13G7.04c	1	0.652075	0.684654	0.338362	0.655389	1.30155	1	0.88764	0.827837	0.661542	0.756563	0.618481
SPAC13G7.05	1	3.28738	5.56969	3.68652	1.66017	1.507	1	1.02758	1.58377	1.25891	1.12782	0.789534
SPAC13G7.06	1	1.01306	1.46626	1.71778	1.1333	1.16815	1	1.16183	1.29734	1.14943	1.44456	1.46968
SPAC13G7.08c	1	0.717989	0.515633	0.396856	0.801671	1.55398	1	1.38588	1.37845	1.12554	0.96564	1.18948
SPAC13G7.12c	1	1.29034	1.2407	1.28509	0.857003	1.03155	1	0.926441	1.11821	1.04782	1.24472	0.979618
SPAC140.01	1	1.39269	1.01652	0.441015	0.682825	0.962558	1	1.02288	0.987559	1.12074	1.03078	0.942761
SPAC140.02	1	0.612526	0.740378	0.42736	0.602332	1.04413	1	1.01902	0.938604	0.895732	0.56489	0.70833
SPAC1420.02c	1	0.836814	0.843063	0.754723	0.976916	0.962478	1	1.19054	1.10294	1.1046	1.17223	1.02017
SPAC144.02	1	1.26428	0.869742	0.993333	0.821194	0.952097	1	0.706343	1.03682	0.817688	0.845863	0.896412
SPAC144.11	1	1.00822	0.610944	0.402346	0.440931	0.527234	1	0.972888	0.843144	0.868309	0.823821	0.919407
SPAC144.12	1	0.630834	0.409924	0.312164	0.559237	0.67973	1	0.846506	0.902544	0.84851	0.854486	0.710237
SPAC144.16	1	1.26956	1.06276	1.79636	1.29604	0.814205	1	0.974845	0.885357	1.00146	1.1674	1.33142
SPAC144.17c	1	0.710263	1.02371	0.87619	1.08619	1.35362	1	1.0016	1.03292	0.744983	0.705688	1.39298
SPAC1486.01	1	1.2586	1.74314	2.94383	1.61765	1.26943	1	1.14829	1.31851	0.950068	1.20686	1.24906
SPAC1486.03c	1	1.08855	1.73799	0.874708	1.02399	1.46309	1	0.852478	0.615965	0.686995	0.620321	0.80106
SPAC1486.04c	1	1.36204	0.842894	1.3205	0.980777	0.907405	1	0.92285	1.00637	0.852908	0.999316	0.871992
SPAC1486.06	1	0.740693	0.756834	0.675374	0.982249	0.92773	1	1.10038	0.873904	0.871187	0.916404	0.992768
SPAC1486.09	1	0.314818	0.308226	0.330318	0.720249	1.12157	1	0.790174	0.604003	0.587278	0.754849	0.628964
SPAC1486.10	1	0.676782	0.558129	0.601175	0.682475	0.748378	1	1.15681	1.14731	1.0883	0.632854	0.964507
SPAC14C4.02c	1	0.778251	0.785511	1.04771	0.966873	0.850977	1	0.435964	0.712489	0.597155	0.617731	0.444295
SPAC14C4.04	1	0.996395	1.61687	1.16342	1.20715	1.00234	1	1.44123	1.31441	1.29657	1.17778	1.32093
SPAC14C4.11	1	0.98954	0.607058	0.647033	0.76428	0.844217	1	1.05154	1.07476	1.05715	0.918486	1.01848
SPAC14C4.14	1	1.17854	1.59381	1.08715	1.10349	1.3513	1	1.16011	1.00431	0.892116	0.981712	0.905421
SPAC1527.03	1	0.518358	0.466797	0.421225	0.752595	1.19052	1	0.996834	0.819592	1.10407	0.836735	1.06403
SPAC1556.02c	1	0.904971	1.06858	0.805551	0.661612	0.80157	1	1.13396	1.31661	1.1578	1.05637	1.07523
SPAC1556.07	1	0.990542	0.754862	0.910108	0.800703	0.681897	1	0.973905	0.954774	0.916945	0.956933	0.936798
SPAC1556.08c	1	0.833762	1.0744	0.844996	1.06391	1.00349	1	0.977627	0.991393	1.0514	1.09156	1.22314
SPAC1565.01	1	0.77006	1.1567	1.08208	1.37255	1.14054	1	1.97259	1.83004	2.02263	1.7607	1.99541
SPAC1565.05	1	0.474958	0.389348	0.386606	0.756784	1.04705	1	1.34373	1.14252	0.898774	0.801546	0.90056
SPAC1565.08	1	1.40115	2.19396	2.27355	2.58337	2.00591	1	1.02817	1.14387	1.1286	1.08857	1.13814
SPAC15A10.02	1	1.23066	1.09874	1.42385	1.25084	1.07221	1	0.580855	0.529039	0.842002	0.681535	0.966977
SPAC15A10.11	1	0.778988	0.927575	1.06636	1.12358	0.986157	1	0.665674	0.867469	0.938231	0.845518	0.704918
SPAC15A10.13	1	0.642647	0.629961	0.734778	0.935068	1.08132	1	2.17982	2.22374	1.85022	1.27882	1.36751
SPAC15A10.16	1	1.12769	1.9135	1.84449	1.90917	2.22376	1	0.869827	0.728719	0.839407	0.738685	0.888866
SPAC15E1.03	1	1.46531	0.657111	0.459002	0.549739	0.519621	1	0.986247	0.940902	1.18991	1.20125	0.741638
SPAC15E1.04	1	1.37637	2.62555	1.92192	1.94796	1.92373	1	1.63123	1.57537	1.39809	1.45601	1.57357
SPAC15E1.08	1	1.08775	1.43095	0.728513	0.795263	1.36598	1	1.14518	1.24388	1.04897	1.23822	1.10252
SPAC15F9.02	1	0.918514	1.15952	1.20673	0.996854	0.942609	1	0.969094	1.30397	1.14956	1.13255	1.18559
SPAC15F9.03c	1	1.24303	0.970557	1.16597	1.10815	0.74315	1	1.05265	1.22655	1.2506	1.25531	1.29061
SPAC16.02c	1	1.31392	0.761888	0.811478	0.824701	0.826033	1	1.05193	0.947505	0.924725	0.863568	0.82941
SPAC16.03c	1	0.866548	0.791406	0.642704	0.956562	0.893255	1	1.22183	1.23473	1.13302	1.41671	1.29734
SPAC16.04	1	0.446822	0.405509	0.444803	1.0189	1.44179	1	0.93213	0.991393	0.807501	0.841826	0.748026
SPAC1635.01	1	1.134	1.64762	1.5282	1.63889	1.39871	1	0.883733	0.927908	1.11441	0.929085	1.49143
SPAC167.02	1	1.00451	1.36024	0.846277	1.31623	1.26237	1	0.613149	0.720959	0.839851	0.804344	0.848095
SPAC1687.03c	1	0.663476	0.669035	0.666364	0.734798	0.785611	1	0.895392	0.650758	0.673681	0.50764	0.737581
SPAC1687.04	1	0.953922	1.01889	0.813696	1.19318	1.62461	1	0.573549	0.742485	0.848555	0.639412	0.79332
SPAC1687.06c	1	1.00174	0.604969	0.382573	0.436474	0.515149	1	0.981323	1.04187	0.921167	1.13208	1.06307
SPAC1687.09	1	1.25844	2.1719	1.43455	1.39817	1.42695	1	1.08991	1.19722	0.895732	1.42977	0.882725
SPAC1687.11	1	0.476179	0.546979	0.419843	0.716697	1.26171	1	0.809419	0.910841	0.748485	0.712109	0.468901
SPAC1687.12c	1	0.924309	1.156	1.19828	1.20727	1.01404	1	0.936601	0.771613	0.666611	1.00319	0.966977
SPAC1687.15	1	1.35465	1.50962	1.68358	1.22696	0.802146	1	1.26905	1.08523	0.828877	1.10749	1.16306
SPAC1687.19c	1	0.65634	0.386089	0.484792	0.676818	0.840045	1	1.17252	1.0039	1.06822	0.85255	0.982961
SPAC1687.21	1	0.952493	0.872743	0.980808	0.905211	0.86154	1	1.02808	1.07604	0.925954	0.904707	1.08732
SPAC16C9.02c	1	0.834665	0.536228	0.442113	0.421824	0.550199	1	1.10317	1.02394	0.880705	0.977988	0.734856
SPAC16C9.03	1	0.349985	0.268126	0.511559	0.600564	0.773644	1	1.10416	1.06473	1.12094	1.05455	0.830803
SPAC16C9.04c	1	1.15818	1.54187	1.18112	1.26289	1.58931	1	0.904189	1.1316	1.01801	0.820608	0.82502
SPAC16C9.06c	1	0.944382	1.0953	0.869367	0.86578	1.50168	1	1.19479	1.15607	1.11297	1.01287	1.16819
SPAC16E8.04c	1	1.37316	1.09307	1.34817	1.18088	1.13312	1	1.16516	0.983854	1.33354	1.04076	0.960678
SPAC16E8.06c	1	0.643431	0.529155	0.50234	0.943348	1.33307	1	1.0459	0.81685	0.918073	0.890459	1.1069
SPAC16E8.07c	1	1.32437	1.04333	1.32864	0.985004	1.01395	1	0.986591	0.837698	0.869719	1.04646	0.952213
SPAC16E8.11c	1	1.20683	0.965298	1.62006	1.2061	0.807913	1	1.76565	1.20428	1.68776	1.06405	1.10578
SPAC16E8.15	1	0.735334	0.646458	0.467198	0.818216	0.829926	1	1.29713	1.35989	1.19874	1.12773	1.23305
SPAC16E8.16	1	1.10518	2.26634	2.13571	2.28045	1.81302	1	0.755112	0.634922	0.967501	0.678199	1.01129
SPAC16E8.17c	1	1.16227	1.48334	0.960408	1.41129	1.55329	1	1.13015	1.3807	1.18231	0.922174	0.840523
SPAC1751.03	1	1.28893	0.709241	0.741565	0.733852	0.878126	1	1.19494	1.22181	1.06447	0.989083	0.958447
SPAC1782.05	1	1.37662	1.79137	1.34511	1.53645	1.31439	1	0.765823	0.701021	1.35422	1.40088	0.800733
SPAC1782.06c	1	1.16611	1.62668	1.12796	1.27192	1.2339	1	1.10154	1.04575	1.18289	1.21878	1.28455
SPAC1782.07	1	1.23861	1.21504	1.37672	0.903086	0.848155	1	1.17039	1.33218	1.31938	1.1064	0.981177
SPAC1782.10c	1	1.06219	0.436379	0.281272	0.671317	0.616522	1	1.14065	0.964789	0.890903	1.11779	0.73468
SPAC1782.11	1	1.25172	0.897857	0.714515	0.542715	0.704918	1	1.18981	1.15851	0.92662	0.933366	0.938384
SPAC1783.05	1	0.967006	0.582194	0.700783	0.763687	0.789979	1	1.07368	1.05682	0.900587	0.787362	0.889892
SPAC1783.08c	1	0.955018	0.76892	0.480278	0.564891	0.591938	1	1.03711	1.06505	0.967988	1.00471	0.914059
SPAC1786.02	1	0.902696	0.695109	0.465984	1.41296	1.57243	1	0.987147	0.968759	0.811172	0.87013	0.796163
SPAC1786.03	1	0.832544	1.15225	0.962364	1.57791	1.41902	1	1.17184	0.859689	0.684127	0.763288	0.936272
SPAC17A2.03c	1	0.937537	1.07019	1.32881	1.23147	1.08146	1	1.28052	1.20955	1.15021	1.1216	1.1761
SPAC17A2.04c	1	1.31178	1.48747	1.0248	1.7512	1.5774	1	1.19394	1.0172	0.939452	0.783117	0.683756
SPAC17A2.05	1	1.47295	1.70977	2.73616	2.26813	1.70751	1	0.988674	1.24037	1.46272	1.53022	1.62443
SPAC17A2.09c	1	1.31254	1.02337	1.14218	0.926687	0.951705	1	0.822864	0.748263	1.20592	1.03597	1.01729
SPAC17A2.13c	1	0.928174	1.36248	1.3692	1.43578	1.247	1	1.05614	0.941329	1.09355	0.996845	1.1095
SPAC17A5.12	1	1.0395	1.46133	1.03613	1.38165	1.66274	1	1.30789	1.06039	1.64848	0.787605	1.24405
SPAC17A5.13	1	0.724464	0.704025	0.523087	0.661549	0.686065	1	1.68848	1.83422	2.48615	1.47666	1.44148
SPAC17A5.14	1	1.12136	1.56381	1.0002	1.07521	1.372	1	1.10399	1.04328	1.11877	0.869401	0.89804
SPAC17A5.15c	1	1.03862	0.63798	0.570476	0.578617	0.637183	1	1.02384	1.19653	1.08144	1.02688	0.937946
SPAC17A5.16	1	0.87495	1.02587	1.39458	1.87215	1.1644	1	1.34171	0.876276	0.895732	0.648483	1.37967
SPAC17C9.03	1	0.863746	0.595331	0.643305	0.796892	0.986956	1	1.0566	0.903272	0.999591	0.992318	1.01646
SPAC17C9.06	1	1.36782	1.60169	1.93242	1.48457	1.18671	1	1.1904	0.90585	1.42324	0.97878	1.38859
SPAC17C9.08	1	0.967418	1.17236	0.835043	1.51089	1.36644	1	1.03398	0.846563	0.700226	0.783117	0.916558
SPAC17C9.09c	1	1.27596	0.917776	0.556079	0.752507	0.573861	1	0.845895	0.993214	1.12931	0.784651	0.877517
SPAC17C9.10	1	1.02279	1.18845	0.860389	0.924106	0.888042	1	1.03398	0.791887	0.746444	0.783117	0.624181
SPAC17C9.12	1	1.21081	1.68567	3.14059	1.27436	0.857547	1	0.993117	1.09547	0.997804	1.13131	1.53699
SPAC17D4.04	1	0.864515	0.849763	0.561384	0.935493	1.17031	1	1.00177	0.850137	0.758971	0.824207	0.665633
SPAC17G6.05c	1	0.908768	1.28888	1.26181	1.5911	1.50534	1	1.11581	1.11739	0.895212	0.967683	0.856183
SPAC17G6.06	1	0.986139	0.714498	0.545133	0.493305	0.711315	1	1.03812	0.958942	0.9221	0.810549	0.693747
SPAC17G6.08	1	1.33026	0.909287	1.65481	1.04959	1.13199	1	1.30789	0.777618	1.0343	1.42977	1.10781
SPAC17G6.09	1	1.42177	1.10873	1.966	1.31736	1.06771	1	0.755112	0.909354	0.689535	0.733582	0.599694
SPAC17G6.10	1	1.13866	1.22686	1.41767	1.18455	0.890982	1	0.828717	0.744923	1.12554	0.932207	0.781905
SPAC17G6.11c	1	1.07592	0.635265	0.443483	0.766689	0.960375	1	1.17409	0.652132	0.613341	0.86879	0.860125
SPAC17G6.13	1	6.82239	11.8303	16.332	4.89444	2.86831	1	1.33729	1.65973	2.5562	2.3014	2.80787
SPAC17G6.14c	1	1.00466	1.06717	1.00101	0.932458	1.03179	1	1.05003	1.13279	0.971271	1.16118	1.01711
SPAC17G6.15c	1	0.967298	0.957744	0.879241	1.01809	1.09584	1	0.919093	1.32221	0.910193	0.574789	0.811169
SPAC17G8.02	1	1.33622	0.949958	1.31744	0.895459	0.996798	1	0.581285	0.892356	0.890186	0.920859	0.789534
SPAC17G8.03c	1	1.29079	1.08901	1.32438	0.885645	1.04822	1	1.12565	0.892356	0.726834	0.635453	1.42538
SPAC17G8.04c	1	1.15766	1.15509	1.68745	1.39232	1.13586	1	0.964865	0.849497	1.06536	0.62746	1.03613
SPAC17G8.06c	1	1.03794	0.936801	0.402319	0.532738	0.81088	1	1.09353	1.3103	1.03455	0.985782	0.996246
SPAC17G8.08c	1	0.804401	0.681602	0.243523	0.462894	0.804563	1	1.09216	1.15787	0.960326	0.750952	0.915596
SPAC17H9.02	1	1.10135	1.43293	0.964185	1.0117	1.57028	1	1.36816	1.17201	0.885114	0.62965	0.599088
SPAC17H9.04c	1	0.301533	0.27482	0.353207	0.412093	0.860331	1	1.34774	1.44584	0.800057	0.872393	1.11502
SPAC17H9.05	1	0.372316	0.31625	0.260843	0.654527	1.05035	1	0.916147	0.909809	0.877635	0.747867	0.851269
SPAC17H9.09c	1	0.975833	0.752228	0.909025	0.939095	0.98582	1	1.1069	1.13127	0.761226	0.955305	0.996737
SPAC17H9.12c	1	1.08577	0.83055	0.676759	0.847522	0.757581	1	1.05524	0.990806	0.955623	0.939885	0.860437
SPAC17H9.13c	1	0.914673	1.09252	1.38941	0.974242	0.76893	1	1.02904	0.914392	1.06105	0.815194	0.82807
SPAC17H9.16	1	1.22253	0.982365	1.01614	0.78679	0.676025	1	0.936084	0.961675	1.17662	1.24064	1.02563
SPAC1805.02c	1	1.11235	0.697144	0.666817	0.971707	0.970627	1	1.47982	1.0458	1.22	1.29996	1.13582
SPAC1805.04	1	0.866851	0.977771	0.928403	1.24772	1.17403	1	0.588718	0.701307	0.602981	0.46236	0.417343
SPAC1805.06c	1	1.15606	1.216	0.940441	1.28348	1.03989	1	1.0685	1.10125	0.812243	0.982608	0.986691
SPAC1805.11c	1	1.10226	0.917065	0.719861	0.617097	0.594186	1	0.981895	1.06975	1.1489	1.04836	0.918998
SPAC1805.13	1	1.1624	0.905271	0.632042	0.622733	0.580909	1	1.11889	1.26129	1.30375	1.17227	1.32597
SPAC1805.16c	1	1.27718	1.59103	0.973258	1.57624	1.46876	1	1.16516	1.30911	0.998344	1.23437	1.36113
SPAC1805.17	1	1.08633	0.950129	0.824982	1.24022	0.86992	1	1.25455	1.10841	1.10259	1.1549	1.25259
SPAC1834.01	1	0.685923	0.38156	0.499191	0.715414	0.68697	1	1.07021	1.05912	0.964776	0.945531	0.921646
SPAC1834.02	1	1.00016	0.881496	0.942992	0.900936	0.958937	1	1.05903	1.02592	0.958514	0.890515	0.9304
SPAC1834.03c	1	1.18639	0.923888	0.624663	0.688836	0.924096	1	0.963092	0.919824	0.951647	0.84012	0.81195
SPAC1834.05	1	0.903107	1.10544	1.10571	0.956572	0.980292	1	1.30789	1.37159	1.10715	1.10749	1.43018
SPAC1834.08	1	1.0433	1.72726	1.49603	1.16491	1.4138	1	1.07193	1.35366	0.986169	0.98304	1.12919
SPAC1834.11c	1	1.54652	1.63621	2.5261	1.72295	1.15304	1	1.22909	1.33241	0.998832	0.931926	1.17221
SPAC1851.02	1	1.31929	1.00136	1.09565	1.03262	0.88711	1	1.14886	1.23747	0.903531	0.828491	1.04528
SPAC1851.03	1	0.909621	0.842405	0.988964	1.12355	1.1099	1	2.18852	3.46988	2.02945	2.84521	3.05785
SPAC18B11.02c	1	0.738217	0.504484	0.588951	0.724792	0.787527	1	0.807249	0.725625	1.10572	1.09614	0.717794
SPAC18B11.04	1	0.872702	0.965756	1.01257	1.1947	0.939544	1	1.75472	1.33853	2.04258	1.14382	0.99869
SPAC18B11.10	1	1.06173	1.29942	0.903262	1.07945	1.36174	1	1.07221	0.924725	0.987049	1.07093	0.786966
SPAC18G6.03	1	1.03761	1.26848	0.93429	1.15477	1.4116	1	1.30057	1.14244	1.46491	1.08339	1.20118
SPAC18G6.04c	1	1.18229	0.753601	0.722401	0.772101	0.700246	1	1.04416	1.01196	1.13371	1.05929	0.983005
SPAC18G6.05c	1	1.00653	1.0691	1.28065	1.21578	1.01033	1	1.25662	1.0742	0.98429	1.05053	1.05297
SPAC18G6.07c	1	0.872228	0.859613	0.626352	0.809269	1.06019	1	0.915398	0.852264	0.704941	0.761658	0.744576
SPAC18G6.12c	1	1.36978	2.94307	1.39815	1.68902	1.55421	1	1.57189	1.52616	1.32186	1.31041	1.35031
SPAC18G6.14c	1	1.13785	0.615451	0.554673	0.528104	0.541837	1	0.996768	1.10437	0.909019	1.02661	1.03198
SPAC18G6.15	1	1.02733	0.997207	1.53993	0.943649	0.861512	1	1.29838	1.21115	1.09643	1.27454	1.09584
SPAC1952.08c	1	1.67978	1.56445	2.32776	1.51833	1.12887	1	0.970598	1.13143	1.01157	1.0212	1.28316
SPAC1952.11c	1	1.02411	1.1223	1.14223	1.61684	1.43844	1	1.07376	1.09612	1.08079	0.965367	1.03093
SPAC1952.13	1	1.47186	2.65744	2.02579	2.02001	1.76262	1	0.871928	0.735082	0.737144	1.07277	0.984721
SPAC1952.17c	1	1.11662	0.877935	1.3751	1.12902	0.935448	1	0.962583	1.26984	1.02129	0.756563	0.936272
SPAC19A8.04	1	1.07046	1.34522	0.824657	1.1019	1.37085	1	1.09697	1.0245	1.03018	0.962118	0.919884
SPAC19A8.05c	1	1.27478	2.21377	2.35704	1.81114	1.18283	1	0.818143	0.458614	0.957578	0.747445	0.931802
SPAC19A8.07c	1	0.305447	0.321889	0.335664	0.674264	0.936317	1	1.42703	0.999108	1.00938	1.42977	1.00092
SPAC19A8.12	1	1.06024	1.06336	1.38871	1.02617	0.919714	1	1.26354	1.03682	1.2238	1.31041	1.23582
SPAC19A8.15	1	1.09569	1.1423	0.624803	1.0478	1.03434	1	0.837646	0.863386	0.920562	0.819752	0.844536
SPAC19B12.02c	1	0.277913	0.229683	0.182118	0.709053	1.14378	1	0.631772	0.887883	0.833881	0.933922	0.786237
SPAC19B12.04	1	1.10758	0.813556	0.700817	0.713503	0.948417	1	1.41861	1.04117	1.04296	1.07443	1.0674
SPAC19B12.09	1	1.36012	0.935549	0.439993	0.820516	0.731283	1	0.92482	0.96986	1.26676	1.04416	0.966977
SPAC19B12.11c	1	0.572145	0.308762	0.494699	0.673679	0.820264	1	0.92482	0.719934	1.0706	1.19623	0.895247
SPAC19B12.13	1	1.12001	1.27041	1.08435	1.215	1.40171	1	0.833156	1.01403	0.980435	0.977729	0.923979
SPAC19D5.04	1	0.98879	1.10788	1.68246	1.45034	1.23763	1	0.983964	1.18274	0.619109	0.784572	1.05778
SPAC19D5.05c	1	0.633243	0.365411	0.590635	0.695879	0.707674	1	1.03168	1.07268	0.971078	0.8088	0.70618
SPAC19G12.03	1	1.40758	0.871945	1.01402	1.31003	0.944381	1	1.16143	1.28786	1.37216	1.18396	1.4546
SPAC19G12.05	1	1.26416	0.666329	0.537455	1.10719	0.796681	1	1.0988	0.849708	0.907143	1.01326	0.854907
SPAC19G12.06c	1	2.11593	1.04589	0.465299	0.799463	0.968744	1	1.16757	1.26741	1.2937	1.28493	1.20207
SPAC19G12.07c	1	1.06144	1.09388	1.03064	1.10669	1.378	1	1.06343	0.887883	0.895732	1.13784	0.970998
SPAC19G12.08	1	0.78474	1.29529	1.0082	0.82791	0.849678	1	1.02282	1.04916	0.912521	0.923269	0.627881
SPAC19G12.09	1	8.26715	14.5237	38.5384	14.87	3.88946	1	1.15472	1.24241	1.57938	2.49541	2.33477
SPAC19G12.10c	1	1.97059	2.01008	3.99065	2.26329	1.4105	1	1.28869	1.5424	1.38185	1.76677	1.84479
SPAC19G12.11	1	1.19021	0.892576	0.742157	1.38491	0.870167	1	1.20126	0.955904	0.918413	0.8088	1.00348
SPAC19G12.14	1	1.33149	0.910664	1.29589	0.992743	0.963573	1	1.16981	0.846563	2.19409	1.2132	1.22314
SPAC19G12.15c	1	1.25379	2.32346	3.6261	2.54981	1.5937	1	1.01676	1.10206	1.14761	1.34421	1.23991
SPAC1A6.04c	1	1.39409	1.82922	1.50479	1.08593	1.28985	1	0.721993	0.71614	0.910518	0.894162	0.678834
SPAC1A6.07	1	1.72821	2.9061	2.12659	1.7441	1.217	1	1.28147	0.858571	1.28473	1.64055	1.09645
SPAC1A6.10	1	0.725351	0.849768	0.480022	0.755495	0.94662	1	0.997202	0.934603	1.00827	0.97631	0.902128
SPAC1B1.03c	1	0.96308	1.16637	0.826381	0.804996	1.12335	1	1.25221	1.13938	1.17317	0.958495	0.965031
SPAC1B2.03c	1	0.580996	0.297743	0.225405	0.50862	0.72986	1	0.826572	0.788533	1.07335	0.886705	1.00417
SPAC1B2.04	1	0.947369	1.22692	0.851188	0.887164	0.960262	1	1.16618	1.25928	1.26676	0.956135	1.07775
SPAC1B3.01c	1	0.86199	0.610846	0.711286	0.834367	0.792333	1	0.912353	0.951455	0.927028	0.970709	0.975644
SPAC1B3.03c	1	1.94029	2.51199	3.40847	3.60183	2.79639	1	1.13035	1.34664	1.26052	1.01649	1.4027
SPAC1B3.05	1	1.04179	1.40397	0.949161	1.07252	1.53273	1	1.12392	1.17585	1.13447	0.900082	1.05587
SPAC1B3.06c	1	1.04879	1.01431	1.70535	1.57026	1.05703	1	1.54752	1.32804	1.09704	1.74233	1.69738
SPAC1B3.12c	1	1.0386	0.490359	0.373898	0.723719	0.556543	1	1.04899	1.07916	1.0183	0.896298	0.952017
SPAC1B3.16c	1	1.165	0.2759	0.127531	0.266119	0.339715	1	0.802801	0.641368	0.632217	0.402172	0.330137
SPAC1B9.02c	1	1.02976	1.56013	1.81107	1.50389	1.1495	1	0.907269	0.666746	1.13444	0.96032	0.665519
SPAC1D4.02c	1	1.43816	1.69904	1.77801	1.27791	0.875783	1	0.812944	1.11203	1.18057	1.54735	1.11657
SPAC1D4.04	1	0.935142	0.961546	0.58909	0.893486	1.05515	1	1.06453	1.07782	0.855044	1.01289	1.00766
SPAC1F12.02c	1	1.19082	0.589407	0.447512	0.493766	0.662427	1	1.01916	1.00991	1.15074	0.907548	0.968505
SPAC1F12.07	1	0.9983	1.05952	0.819498	1.18016	0.954556	1	1.08992	1.04096	1.04877	1.1237	1.06203
SPAC1F12.10c	1	1.7184	3.14777	2.80618	2.19885	1.6626	1	0.697228	0.704383	0.836345	0.812679	0.929042
SPAC1F3.01	1	0.866706	0.451417	0.444491	0.71551	0.894086	1	1.27824	1.25198	1.20474	1.10641	1.17619
SPAC1F3.02c	1	2.12898	1.99897	2.82284	1.20039	1.00286	1	0.951631	1.00587	0.831993	0.84941	1.40226
SPAC1F3.05	1	0.925158	1.17533	0.992287	1.21915	1.20529	1	0.949308	1.00472	0.982554	1.27257	0.99888
SPAC1F3.06c	1	0.839724	0.680773	1.02609	0.984608	0.919686	1	0.989336	0.801904	0.860424	0.681796	0.75762
SPAC1F3.09	1	1.64505	2.76433	3.32267	1.4157	1.02022	1	1.04691	1.23498	1.16246	1.60692	1.31649
SPAC1F5.02	1	1.27536	1.09826	1.60464	1.29974	0.971553	1	0.900553	1.04924	0.988531	0.9532	1.06313
SPAC1F5.03c	1	0.804284	0.788022	0.489168	1.02239	0.957652	1	0.699098	0.970959	0.770924	0.755705	0.683756
SPAC1F5.04c	1	0.865261	1.03936	1.11555	1.1203	0.975587	1	1.12529	0.783765	1.02756	1.18396	0.71416
SPAC1F5.06	1	1.07616	1.60964	1.35586	1.19212	1.49454	1	1.11743	0.966541	0.990363	0.831122	0.948028
SPAC1F5.11c	1	1.08464	0.746627	0.882514	0.99492	1.08565	1	1.13584	0.786728	1.0601	1.02821	0.911675
SPAC1F7.02c	1	0.396636	0.206737	0.396559	0.546141	0.635808	1	1.41669	1.28405	1.13281	0.933637	1.11111
SPAC1F7.04	1	1.48468	0.922825	0.944796	0.926477	1.06053	1	0.871928	1.03682	1.38214	1.3286	1.76545
SPAC1F7.05	1	0.843835	1.43177	2.04896	2.26976	2.85363	1	1.05008	0.898285	0.97104	0.963708	1.0919
SPAC1F7.09c	1	0.778751	1.16576	1.35385	1.15526	1.28237	1	1.12001	1.36832	1.16407	1.10749	1.24836
SPAC1F7.11c	1	1.08371	0.955354	1.56814	0.880955	0.77065	1	0.919093	0.804359	0.861919	1.8984	1.20603
SPAC1F7.12	1	2.22967	2.71525	7.00727	3.71593	1.46592	1	0.970192	0.866485	1.40045	2.05068	1.96441
SPAC1F8.07c	1	0.899221	0.759419	0.485864	0.637935	0.768705	1	1.00574	1.27121	1.10723	1.07333	1.1186
SPAC20G4.02c	1	1.83969	2.34887	2.14016	1.43696	1.31407	1	0.675393	0.757189	0.716586	0.933922	0.82807
SPAC20G4.06c	1	1.26924	1.01205	1.28793	0.922109	0.730805	1	0.917345	0.963937	1.09445	1.17551	1.04057
SPAC20G4.08	1	1.02404	1.39302	1.35402	1.2859	1.01895	1	0.92482	0.947837	1.07366	1.20076	1.0842
SPAC20G8.01	1	1.29418	1.42323	1.03866	1.41144	1.58024	1	1.17571	0.72757	0.961198	1.41671	1.16622
SPAC20G8.03	1	0.88345	0.836418	1.22644	1.02035	0.85988	1	1.74386	1.42498	1.41313	0.976719	1.17549
SPAC20G8.04c	1	0.901853	0.865931	0.39551	0.52433	0.730769	1	1.07007	1.16157	1.05028	0.86723	0.964221
SPAC20G8.05c	1	0.74557	0.650796	0.379981	0.941858	1.49203	1	0.840915	0.891464	0.860447	0.959215	0.922367
SPAC20G8.06	1	0.948699	1.09199	1.04606	1.02644	1.05473	1	1.07852	1.20138	1.09083	1.01938	1.03615
SPAC20G8.07c	1	0.888314	0.682281	0.857838	0.987518	0.711258	1	1.33867	1.23303	1.15968	0.966701	1.04018
SPAC20G8.09c	1	0.646423	0.319852	0.354362	0.546423	0.856627	1	1.1625	1.26385	1.01522	0.981153	0.96519
SPAC20H4.03c	1	1.02173	0.919345	1.07406	0.919643	0.716008	1	1.07738	0.961577	0.901048	0.661855	1.00231
SPAC20H4.10	1	1.08975	1.354	2.3861	1.31019	1.12674	1	1.08116	0.992683	1.16577	1.10064	1.35607
SPAC21E11.04	1	8.97902	13.7323	87.8006	24.8853	8.40946	1	1.09826	1.09972	1.20004	1.1216	1.05374
SPAC21E11.06	1	1.02656	1.09621	0.641544	0.94002	1.29588	1	0.484136	0.616459	0.535479	0.512839	0.616423
SPAC21E11.08	1	1.25161	1.38999	1.20011	1.222	1.24563	1	1.02033	0.984995	1.32905	1.16318	1.06163
SPAC222.03c	1	0.954322	0.761499	0.679842	0.721928	0.662411	1	0.631287	1.0157	0.656783	0.375072	0.521023
SPAC222.06	1	0.336249	0.364651	0.349807	0.518833	0.817871	1	0.955149	0.976137	0.911873	0.700441	0.696077
SPAC222.08c	1	1.91697	0.994445	1.58042	0.976441	0.645557	1	0.939749	0.986373	0.95273	0.975449	0.974437
SPAC222.09	1	1.34889	1.25465	1.0804	0.601263	1.40624	1	1.13852	0.989595	1.33634	0.89715	0.925325
SPAC222.11	1	1.21794	1.71632	2.0069	1.30783	0.878169	1	1.18664	1.11614	1.07862	1.29258	1.23751
SPAC222.12c	1	1.37223	1.3717	1.10164	1.10165	1.13039	1	1.03109	1.12367	0.953697	1.06185	1.08329
SPAC222.14c	1	1.09044	1.73163	1.39253	1.39076	1.47717	1	1.33867	1.33192	1.23623	1.41379	1.45975
SPAC227.02c	1	0.624052	0.333782	0.400976	0.559727	0.737561	1	0.858616	0.570753	0.97515	0.545293	0.71416
SPAC227.07c	1	1.3427	2.24295	1.56812	1.3527	1.61443	1	1.0634	1.32313	1.222	1.00768	1.02533
SPAC227.10	1	1.32278	0.852685	1.86928	1.19117	0.871896	1	0.791968	0.755709	0.742702	0.530173	0.648668
SPAC227.13c	1	4.46431	2.92726	3.28711	1.5125	1.2316	1	1.99784	1.79583	1.73072	3.32248	2.20505
SPAC227.15	1	0.977179	1.08708	1.46913	1.43756	1.11383	1	0.551456	0.914392	0.815869	1.27882	1.27308
SPAC227.18	1	1.06137	0.871894	1.03672	1.05504	0.739535	1	0.883809	1.00587	0.940377	0.95273	1.06367
SPAC22A12.07c	1	1.01198	1.07628	1.43273	1.20387	1.2981	1	0.998319	1.15367	1.07793	0.952378	1.1098
SPAC22A12.08c	1	1.02875	1.22567	2.10023	1.82236	1.2724	1	0.859877	0.851528	0.868183	0.959327	0.77705
SPAC22A12.09c	1	0.860661	0.810958	0.903856	1.10536	0.809293	1	1.05694	0.833505	1.13013	1.0199	0.957059
SPAC22A12.10	1	0.964767	1.00179	1.27926	1.36695	1.20976	1	0.863965	0.879774	0.611106	0.975449	0.762514
SPAC22A12.12c	1	1.3406	1.01942	1.26456	1.01558	1.15905	1	1.14795	1.2604	1.11717	1.59497	1.32898
SPAC22A12.14c	1	1.45405	1.32024	1.76495	1.25099	1.43102	1	1.33379	1.41404	1.53412	1.43548	1.1843
SPAC22A12.15c	1	1.55196	1.98578	1.57663	1.68112	1.96063	1	0.902187	0.92005	1.00842	1.01804	0.996564
SPAC22A12.16	1	1.02566	0.837319	0.590377	0.876873	0.939691	1	0.93352	1.00865	0.872491	0.956193	0.937813
SPAC22E12.03c	1	1.43685	2.17316	4.70937	2.60968	1.39556	1	0.631772	1.2943	1.29115	1.57491	1.79608
SPAC22E12.04	1	1.12383	1.71219	3.07161	2.10496	1.5092	1	1.10777	0.928622	0.835275	1.02843	1.55692
SPAC22E12.05c	1	1.05478	1.11066	1.7193	1.17975	0.913991	1	1.12001	0.909809	1.11877	1.08512	1.44724
SPAC22E12.07	1	0.836492	0.681694	0.510285	0.711662	0.891584	1	1.03951	0.93867	1.01349	1.02246	0.986744
SPAC22E12.10c	1	1.30815	0.666275	0.694183	0.988571	0.864776	1	1.16471	0.889069	0.716878	1.12782	0.829176
SPAC22E12.17c	1	0.850917	1.06615	0.83326	1.18326	1.1881	1	0.974131	1.13994	0.95826	1.09867	1.17048
SPAC22E12.18	1	0.396231	0.417544	0.427259	0.737565	0.933663	1	1.05725	1.36504	0.765487	1.08022	0.926947
SPAC22F3.06c	1	1.16919	1.3312	1.55576	1.36692	1.18547	1	0.94958	0.842928	0.964649	1.01269	0.833832
SPAC22F3.07c	1	1.11021	0.963244	1.00895	0.674455	0.647744	1	1.46227	1.1199	1.55145	1.73154	1.13388
SPAC22F3.10c	1	1.16383	1.97811	2.13646	1.45266	1.35224	1	0.820964	0.969824	0.823155	0.910989	0.909796
SPAC22F8.04	1	1.25272	1.63076	0.875028	1.0555	1.77599	1	0.403624	0.959912	0.504688	0.48335	1.41551
SPAC22F8.05	1	14.8176	37.3005	38.7936	8.96149	2.84268	1	1.17299	2.10163	3.13687	2.94763	3.34363
SPAC22F8.06	1	1.33881	1.18493	0.979316	1.36295	0.891873	1	0.922676	0.975998	1.05563	1.2132	1.02246
SPAC22F8.08	1	0.929643	1.11102	0.896537	1.03807	1.07676	1	1.18079	1.00443	1.03768	1.20353	0.989733
SPAC22F8.09	1	0.386814	0.358898	0.479838	0.630736	0.813637	1	0.956564	0.898507	0.927619	0.884389	0.842377
SPAC22F8.10c	1	1.01698	0.984611	1.06904	0.888769	0.907851	1	1.32688	0.971074	1.08738	0.987673	0.724526
SPAC22G7.04	1	1.04948	0.712725	1.00169	0.762914	0.705243	1	1.03941	0.513844	0.627798	0.677538	0.560118
SPAC22G7.05	1	0.570196	0.4842	0.344465	0.656737	1.27362	1	0.869358	0.803861	0.738419	0.725695	0.71069
SPAC22G7.06c	1	0.827437	0.596775	0.525194	0.612132	0.685265	1	0.970286	0.988863	0.939319	0.870089	0.875673
SPAC22G7.09c	1	0.776474	0.538474	0.762896	0.89318	0.767325	1	1.26652	1.4282	1.1198	1.22866	0.902866
SPAC22G7.10	1	0.815087	1.04691	1.01753	1.26135	1.14281	1	1.21668	1.00647	0.962171	0.938401	1.13388
SPAC22H10.05c	1	1.0702	1.30089	1.0567	1.18834	1.18683	1	1.38414	1.09727	0.801167	0.996061	0.94744
SPAC22H10.08	1	1.07463	1.01198	0.857624	1.13397	1.10406	1	1.11901	1.16147	1.10932	0.780554	0.918354
SPAC22H12.02	1	1.76249	1.11484	1.31116	0.972344	1.11011	1	0.860677	0.934273	0.885281	0.683561	0.844723
SPAC22H12.03	1	1.29435	1.30917	1.50254	1.38907	1.24096	1	1.28432	1.07321	0.957578	1.14637	1.26607
SPAC22H12.04c	1	1.05169	0.88554	0.576854	0.64408	0.794131	1	0.88431	0.882659	0.849266	0.770149	0.818383
SPAC23A1.03	1	1.11079	0.443186	0.120014	0.351105	0.5441	1	1.11325	1.13902	0.838612	0.874201	0.876345
SPAC23A1.14c	1	1.81759	3.80326	2.9999	1.95043	1.40729	1	1.30789	1.51775	1.65857	1.36712	2.3686
SPAC23A1.17	1	1.14452	1.05264	1.76514	0.954615	1.09998	1	0.827109	0.979088	1.31904	1.08489	1.14201
SPAC23C11.03	1	0.695607	0.515967	0.352771	0.715571	1.31516	1	0.650039	0.693397	0.616873	0.602975	0.617671
SPAC23C11.05	1	0.95199	0.932412	0.706863	0.909596	0.789488	1	1.02619	1.12297	1.17329	1.11698	1.1131
SPAC23C11.09	1	0.97115	0.965207	0.647403	0.870102	0.951326	1	1.04293	1.03953	1.03586	0.984785	0.914795
SPAC23C11.11	1	0.80468	0.739333	1.02212	0.952405	0.901303	1	1.07607	1.00277	0.923328	0.945523	0.8954
SPAC23C11.13c	1	1.02218	0.799474	0.65248	0.750009	0.810596	1	1.32053	1.76274	1.35567	1.52804	1.51891
SPAC23C11.14	1	1.16429	1.09759	1.05287	0.998739	0.98895	1	2.48538	2.13222	1.41628	1.70177	1.89323
SPAC23C11.15	1	1.47194	1.04612	1.59558	1.19743	1.14065	1	0.784735	0.86125	0.767059	1.01504	0.907105
SPAC23C11.17	1	0.756648	1.05878	1.22407	1.45512	1.15364	1	1.02758	1.11296	1.05328	1.01474	1.2893
SPAC23C4.02	1	0.924991	1.10851	0.727865	1.23458	1.2166	1	0.962973	1.03177	1.05252	1.00167	0.992009
SPAC23C4.05c	1	2.07083	4.51379	4.80387	1.21815	0.736392	1	1.14492	0.823984	1.1987	0.787228	0.972053
SPAC23C4.06c	1	1.14196	0.407904	0.170611	0.376713	0.808316	1	0.856216	1.10841	1.14452	0.591981	0.926669
SPAC23C4.08	1	1.49927	1.43356	1.76438	1.18211	1.24714	1	1.23309	1.17565	1.15639	1.5909	1.29218
SPAC23C4.09c	1	0.838668	0.711054	0.85772	0.793623	0.679035	1	0.833621	0.86164	0.825824	1.00593	0.756779
SPAC23C4.11	1	1.51397	0.981184	1.1107	1.10856	0.872994	1	2.48538	1.98537	2.09004	1.65096	1.45047
SPAC23C4.12	1	1.02156	1.66675	2.01177	1.6508	1.47	1	0.466065	0.67876	0.874145	0.966701	1.39969
SPAC23C4.14	1	1.13404	0.994916	1.23485	1.02891	0.964755	1	1.35254	1.03682	1.33528	2.022	2.47714
SPAC23C4.15	1	0.920758	0.435736	0.315332	0.727261	0.638733	1	0.938243	1.18932	1.12554	1.10749	0.859182
SPAC23C4.17	1	0.769496	0.355547	0.355986	0.612222	0.82082	1	1.05864	1.08412	0.808179	0.997581	1.16452
SPAC23C4.19	1	0.986097	0.838684	1.0979	1.0242	0.898589	1	1.09715	1.02427	0.994013	1.0847	0.969213
SPAC23D3.02	1	0.88887	0.966372	1.05512	0.960714	0.857398	1	0.807586	0.994342	0.747092	0.935482	0.750269
SPAC23D3.04c	1	1.16659	1.05612	0.62268	0.872537	0.83528	1	1.07732	0.968212	1.00291	1.07574	0.91667
SPAC23D3.06c	1	1.04576	1.47177	1.08246	1.13479	1.1982	1	1.08416	0.913533	1.20214	0.958183	0.949861
SPAC23D3.07	1	1.28543	1.20967	2.15591	1.74872	1.21432	1	1.08796	0.947331	1.04044	1.26543	1.18224
SPAC23D3.08	1	0.8453	0.770858	0.939197	0.930383	0.841851	1	0.779876	0.727694	0.962883	0.582402	0.864891
SPAC23D3.09	1	1.03839	1.02053	1.15279	0.82509	1.00214	1	0.898356	0.955904	0.745294	0.789118	0.7442
SPAC23D3.10c	1	1.0551	0.866939	1.6726	0.86467	0.820795	1	1.33189	1.30464	0.770924	0.845863	0.904524
SPAC23D3.13c	1	0.958674	0.832585	1.14154	0.802847	0.890657	1	1.78692	1.65025	2.42565	1.47666	0.837427
SPAC23E2.01	1	0.95779	0.645874	0.449921	0.916947	0.795481	1	0.815614	1.05184	1.13302	0.655203	1.12179
SPAC23G3.02c	1	0.833584	1.30923	3.8428	3.02286	1.51801	1	1.16981	1.10378	1.161	1.56275	1.98171
SPAC23G3.03	1	2.54439	6.36629	16.4138	6.17786	2.0665	1	1.09715	1.11731	1.67419	2.53925	2.0262
SPAC23G3.06	1	0.915738	0.591024	0.607419	0.741002	0.740772	1	1.17603	1.00032	0.9259	0.897219	0.861676
SPAC23G3.09	1	1.16526	1.65697	1.30374	1.18075	1.40345	1	0.833156	0.96986	0.605214	0.588755	1.14058
SPAC23G3.11	1	0.961186	1.65654	1.4646	1.5339	1.23339	1	0.981987	1.025	1.07257	1.22397	1.06912
SPAC23G3.12c	1	0.85998	0.804575	0.760576	0.925245	1.01151	1	1.05835	1.10226	1.00701	1.20995	0.906205
SPAC23H3.03c	1	1.94215	1.22161	1.72847	1.15114	1.06782	1	1.22342	0.733145	0.517151	0.904266	1.80905
SPAC23H3.07c	1	1.32943	0.935076	0.66698	0.804047	0.648552	1	0.92482	1.18783	1.36825	1.10749	1.93395
SPAC23H3.09c	1	1.0906	1.19205	0.699098	0.895422	0.999233	1	0.945245	0.969883	0.970015	0.852479	0.947806
SPAC23H3.10	1	0.88902	0.912632	1.1182	1.07661	0.886188	1	1.23957	0.933444	1.11549	0.880148	0.805984
SPAC23H3.13c	1	1.14433	1.13439	1.06537	0.675444	0.863366	1	0.892447	0.826161	0.67711	0.683561	0.911675
SPAC23H3.15c	1	53.1574	74.7928	127.657	26.3162	5.48831	1	1.10991	2.30405	4.69568	5.67418	4.82413
SPAC23H4.03c	1	0.747154	0.910263	0.787436	1.04441	1.06218	1	1.08203	1.04371	1.05984	0.848276	0.99869
SPAC23H4.06	1	0.64005	0.269812	0.0979489	0.570007	0.75481	1	1.0505	1.27711	1.01126	1.07032	1.1003
SPAC23H4.09	1	1.35075	0.824284	0.592526	0.583991	0.513409	1	0.940923	0.903157	0.878612	0.832792	0.877958
SPAC23H4.10c	1	0.998502	1.17981	1.05823	1.14564	1.00752	1	1.27553	1.24737	1.21985	1.01933	1.34679
SPAC23H4.12	1	0.834581	1.03918	0.964659	0.797775	0.945141	1	0.833723	0.9461	0.786499	0.869775	0.630013
SPAC24B11.05	1	1.68916	2.0801	2.60819	1.55911	1.21595	1	1.20071	1.36732	1.31458	1.64376	1.35603
SPAC24B11.06c	1	1.30794	1.33021	1.02039	1.1189	0.757851	1	1.00395	1.1028	1.02907	0.970355	0.767289
SPAC24B11.09	1	0.957333	0.525298	0.778925	0.55335	0.588307	1	0.946583	0.966207	0.871842	0.858936	0.795448
SPAC24B11.11c	1	0.934076	1.09455	0.869309	1.13446	1.06074	1	1.05951	1.25208	0.940242	1.10749	1.15305
SPAC24B11.12c	1	1.06485	1.76072	2.09431	1.12258	1.17476	1	1.36924	1.82296	1.19291	1.38935	1.33674
SPAC24C9.02c	1	0.767543	0.869194	0.835365	0.970467	0.876687	1	0.909447	0.959912	0.766676	0.614328	0.758559
SPAC24C9.03	1	1.06358	1.20768	0.966523	1.07224	1.10612	1	0.945921	1.03172	0.96003	0.906778	0.95343
SPAC24C9.05c	1	0.749882	0.620324	0.974029	0.994714	0.886833	1	0.680649	0.93458	0.708139	0.534971	0.606773
SPAC24C9.06c	1	1.27759	1.60126	0.818179	0.875614	1.62438	1	1.01644	0.972397	1.00368	0.960154	0.978923
SPAC24C9.08	1	1.49454	1.32221	2.571	1.86024	1.04635	1	0.88764	0.786728	0.665613	0.883008	0.763822
SPAC24C9.12c	1	0.965912	0.798202	0.581733	0.810089	0.827396	1	0.981506	0.87925	0.966634	0.880235	0.902728
SPAC24C9.14	1	1.68768	2.51892	3.38066	2.08064	1.69598	1	0.939385	0.69736	1.35422	1.42294	1.81825
SPAC24H6.04	1	1.09297	1.23253	0.650007	1.0882	1.39361	1	0.962032	0.956132	0.864189	0.842671	0.799678
SPAC24H6.07	1	0.947025	0.664131	0.48753	0.555436	0.540898	1	1.03564	0.880133	1.07521	0.961269	0.972277
SPAC24H6.13	1	0.629602	0.730562	0.719995	0.900946	1.03615	1	1.27986	1.612	0.602441	0.267564	0.619467
SPAC25A8.01c	1	0.988287	0.715996	0.862082	0.776065	0.712991	1	1.08704	0.926346	0.919002	0.994007	1.01483
SPAC25B8.04c	1	0.935801	1.03095	1.10121	1.03935	0.785559	1	1.25247	1.25346	1.05744	1.33266	1.389
SPAC25B8.08	1	1.32487	1.99711	1.91794	1.33872	0.852884	1	2.01812	1.59985	1.28671	1.45005	0.596831
SPAC25B8.09	1	0.852474	1.05661	0.924684	1.34997	0.907432	1	0.81112	1.07596	0.929545	1.22866	1.36751
SPAC25B8.10	1	1.25326	1.21334	1.94883	2.08578	1.81428	1	1.09302	1.09291	0.957578	1.28893	1.63449
SPAC25B8.12c	1	1.31085	1.30432	0.583143	0.787706	0.722857	1	0.764918	0.899388	0.84073	0.82478	0.766717
SPAC25B8.13c	1	1.62606	2.14951	1.42243	1.40016	0.796648	1	0.799135	0.972627	1.05479	1.32899	0.990857
SPAC25G10.05c	1	0.84228	0.698088	0.486186	0.466607	0.544383	1	1.1852	1.30842	1.03779	1.07943	1.0083
SPAC25G10.09c	1	1.0992	1.3103	1.05608	1.50751	1.402	1	0.978455	0.962398	0.879325	0.85983	0.877074
SPAC25H1.07	1	1.15342	1.26828	1.12975	1.04853	1.58903	1	0.962234	1.11386	0.948614	1.09528	0.961404
SPAC25H1.08c	1	1.01095	0.813726	1.38856	0.892495	0.864726	1	0.774729	0.644138	1.02748	0.656023	0.637186
SPAC26A3.02	1	0.771304	0.565091	0.69457	0.74886	0.93401	1	0.807249	1.09972	0.586394	0.837187	0.633035
SPAC26A3.05	1	1.10845	1.37721	1.2	1.44901	1.52154	1	1.04542	1.05185	0.919397	1.03723	0.971593
SPAC26A3.08	1	1.01318	0.818954	0.984075	0.759718	0.733908	1	1.05207	1.02146	1.06429	0.600623	0.869647
SPAC26A3.10	1	0.81019	0.538354	0.703858	0.892955	0.810575	1	1.45529	0.770591	1.28473	0.727706	0.882725
SPAC26A3.11	1	0.930733	0.853697	1.19336	1.13026	1.09776	1	0.981223	1.18502	0.872963	1.2164	0.970083
SPAC26A3.12c	1	0.729138	0.817424	0.7147	1.07044	1.38742	1	1.16159	1.31699	1.4012	1.36913	1.40716
SPAC26A3.15c	1	0.998859	0.974555	1.37369	1.1842	1.16293	1	0.703758	0.753224	1.00498	0.97145	0.874388
SPAC26A3.16	1	1.60975	1.52755	1.53754	1.89359	1.14106	1	0.997786	1.12875	1.09414	1.19487	1.23508
SPAC26A3.17c	1	0.989127	0.317485	0.482737	0.67445	0.883458	1	0.886737	1.12664	0.618114	0.456723	0.619981
SPAC26F1.03	1	1.33327	0.787586	0.849432	0.721076	0.8053	1	1.00379	1.10032	1.03817	0.94845	0.953357
SPAC26F1.04c	1	6.20232	14.402	24.4396	5.43422	2.68826	1	1.35726	1.70125	2.42025	2.48508	3.08552
SPAC26F1.06	1	1.01507	0.843695	0.935889	1.07635	0.9069	1	1.02316	0.896927	0.996638	0.948138	0.966958
SPAC26F1.07	1	4.60266	6.47963	7.37765	2.40307	1.42179	1	1.04228	1.11127	1.2554	1.50771	1.43701
SPAC26F1.09	1	1.12808	1.68709	1.25668	1.24978	1.48998	1	0.862399	1.04755	0.917205	0.737632	0.814149
SPAC26F1.12c	1	0.58329	0.444782	0.336556	0.645624	0.830877	1	1.004	1.04052	0.795784	0.974973	0.691043
SPAC26F1.13c	1	0.844785	0.718068	0.63694	0.606417	0.578449	1	0.944312	0.910057	0.915187	0.911195	0.855835
SPAC26H5.05	1	1.03555	1.37196	1.15966	0.999576	0.905925	1	0.827184	0.932867	0.968159	1.01388	1.03374
SPAC26H5.07c	1	1.04482	1.27546	1.43321	1.24838	1.06714	1	1.16981	1.10702	0.962883	0.979505	1.05927
SPAC26H5.09c	1	3.43212	4.35188	4.10831	3.43507	1.40633	1	1.60281	1.67412	1.79867	2.09232	1.8506
SPAC27D7.02c	1	1.17964	0.944525	1.23014	1.03912	0.818317	1	1.03351	1.14602	1.19397	1.54363	0.948199
SPAC27D7.06	1	1.14391	1.42025	1.04208	1.12084	1.44712	1	1.28448	1.36336	1.17559	1.35315	1.45258
SPAC27D7.14c	1	1.15391	1.43566	1.28703	1.29374	1.13142	1	1.29328	1.04983	0.882056	1.10861	1.07432
SPAC27E2.02	1	0.961287	0.601619	0.57258	0.736325	0.847135	1	0.773946	1.06013	1.01851	0.86696	0.893361
SPAC27E2.03c	1	1.05138	1.01183	0.848275	0.813156	0.771243	1	0.97718	1.17936	1.07492	1.01238	0.892632
SPAC27E2.09	1	0.919686	1.31898	1.46762	1.40238	1.5117	1	1.55318	1.86362	1.36071	1.1493	0.985397
SPAC27E2.10c	1	0.906365	0.886239	0.951349	1.10603	1.00993	1	0.584907	0.743545	0.916811	0.534971	0.766644
SPAC27F1.02c	1	1.3888	1.25291	1.9265	1.64113	1.57729	1	0.957651	0.653879	0.792129	1.26346	0.855133
SPAC27F1.06c	1	0.565842	0.490963	0.412196	0.613132	0.894344	1	1.03773	1.28766	0.887379	0.998933	0.893348
SPAC27F1.07	1	0.937985	1.31862	1.03841	1.00561	0.971615	1	1.2943	1.03471	1.13903	1.18601	0.945508
SPAC27F1.09c	1	1.12101	1.55215	1.77466	1.30616	1.53921	1	0.632158	0.813351	0.977157	0.821538	0.6411
SPAC29A4.02c	1	1.02666	0.726825	0.34128	0.56419	0.807901	1	0.999199	1.00803	0.89821	0.933635	0.867763
SPAC29A4.04c	1	0.942851	0.865275	0.432733	0.72194	1.04548	1	1.00179	1.00637	1.01477	0.826944	0.88128
SPAC29A4.05	1	1.25102	1.16186	1.25006	0.844968	0.901938	1	0.899912	0.594257	0.658873	0.897689	0.619641
SPAC29A4.08c	1	1.07258	0.90942	0.979038	1.0637	1.10765	1	1.40062	1.17565	1.10572	0.79545	1.07336
SPAC29A4.10	1	1.02298	0.881037	1.03663	0.777985	1.09929	1	1.11637	0.758877	0.648283	0.418594	1.00092
SPAC29A4.11	1	1.19564	1.78338	1.23406	1.43486	1.38532	1	0.952432	0.638121	0.854047	1.10749	0.977904
SPAC29A4.15	1	1.14665	1.18912	0.678682	0.84075	1.31671	1	1.08765	1.03062	0.91874	0.91586	0.844144
SPAC29A4.16	1	0.893582	0.861586	0.812864	0.901723	0.955394	1	0.839623	1.16383	0.992068	0.816119	1.20211
SPAC29A4.18	1	1.10588	0.997594	1.3035	1.01848	1.09777	1	1.01309	1.19122	0.907597	0.522078	0.94744
SPAC29A4.20	1	0.65099	0.554235	0.632519	0.903307	1.14392	1	0.966184	0.786697	0.849554	0.63024	0.891548
SPAC29B12.02c	1	1.35385	0.775951	0.90658	0.928094	0.771645	1	0.59253	0.579602	0.639216	0.389134	0.588484
SPAC29B12.04	1	1.22315	0.860077	0.752105	0.775596	0.620529	1	1.1129	1.06193	1.01496	0.888595	1.05427
SPAC29B12.07	1	1.10007	0.861775	1.01064	1.04082	0.880633	1	0.600935	0.753307	0.833881	0.834137	0.820853
SPAC2C4.03c	1	1.39749	1.01383	0.682816	1.02711	0.83115	1	1.26884	1.19281	1.01898	0.980814	0.869647
SPAC2C4.07c	1	1.5179	3.39359	2.76575	2.64617	1.38373	1	0.836531	1.06778	0.922476	0.976719	1.00822
SPAC2C4.11c	1	0.449248	0.294688	0.563234	0.8961	0.976479	1	0.807249	1.00507	0.398103	0.644467	0.54483
SPAC2C4.15c	1	1.62124	3.00557	2.68787	2.321	1.92386	1	0.965942	0.91524	1.03094	1.68281	1.09645
SPAC2E12.02	1	1.38315	2.28057	2.58441	1.61163	1.14363	1	0.737689	0.716229	0.937202	0.933922	0.949861
SPAC2E1P3.01	1	3.08808	5.01124	10.7053	4.17997	1.82777	1	0.914486	1.3012	2.26408	3.52548	3.69165
SPAC2E1P3.04	1	1.44241	1.92189	2.39456	1.8599	1.21422	1	1.1492	1.04253	1.20632	1.36082	1.15565
SPAC2E1P5.03	1	0.967012	0.602449	0.499494	0.823536	0.705388	1	0.969094	1.11653	1.06429	1.21074	1.04633
SPAC2E1P5.05	1	0.322999	0.273584	0.332173	0.623786	0.852175	1	0.921961	1.36977	0.970058	0.825478	0.906914
SPAC2F3.02	1	0.900013	0.576233	0.594028	0.809173	0.723344	1	1.13267	0.959912	1.14184	0.639412	1.03172
SPAC2F3.03c	1	0.608886	0.38664	0.532105	0.468278	0.70152	1	1.0204	0.842874	0.97695	0.609232	0.872379
SPAC2F3.04c	1	1.87066	1.12197	1.02615	0.807722	0.725286	1	0.959154	0.862421	1.00938	0.856124	0.915497
SPAC2F3.05c	1	21.154	20.009	18.7934	4.89339	2.23692	1	1.37864	2.39444	7.70924	7.48109	6.83756
SPAC2F3.06c	1	1.11232	0.572996	0.743141	0.7601	0.837972	1	1.20444	1.24393	1.04599	1.0618	1.21335
SPAC2F3.09	1	0.87543	0.733522	0.303038	0.85369	1.20542	1	1.07137	1.00082	1.04118	1.06764	0.984514
SPAC2F3.11	1	1.05768	1.04512	1.35795	0.911284	0.977517	1	1.04159	0.945974	0.909347	0.767679	0.86294
SPAC2F3.16	1	1.71449	1.20483	1.66095	1.12688	0.749476	1	1.65437	1.68606	2.10844	1.78832	1.32114
SPAC2F3.17c	1	1.14363	0.948128	0.878432	0.989546	0.872529	1	1.57189	1.07083	1.46272	1.51313	1.29734
SPAC2F7.05c	1	1.10394	1.42478	0.760951	1.14248	1.971	1	0.91366	0.914619	0.928831	0.834239	1.01269
SPAC2F7.11	1	0.663164	0.839227	0.495412	0.878263	1.62986	1	0.779876	1.08743	0.807501	1.10221	0.735016
SPAC2F7.13c	1	0.837624	0.854085	0.689104	0.716205	0.732322	1	0.929805	1.02919	0.954337	1.01264	0.904873
SPAC2F7.15	1	0.715754	0.819773	0.808308	0.704072	0.821671	1	0.716362	1.31149	0.670305	1.03102	1.29734
SPAC2F7.16c	1	1.03732	1.23699	1.15123	1.56648	1.34252	1	0.92377	1.00458	0.626882	0.596661	0.465047
SPAC2G11.03c	1	1.12495	1.2518	1.64078	1.18114	1.20674	1	0.743583	0.682521	0.839692	0.896007	0.865709
SPAC2G11.06	1	1.01321	1.09001	1.38623	0.902334	1.0803	1	0.823611	0.947505	0.796984	0.881569	0.915596
SPAC2G11.07c	1	1.08977	1.01655	1.70696	1.42363	0.975011	1	0.770307	0.802394	1.05649	1.03456	0.85539
SPAC2G11.11c	1	0.456555	0.5016	0.614653	0.679271	1.13264	1	0.827184	1.07417	0.74105	0.767295	0.692813
SPAC2G11.14	1	0.988237	1.58842	1.57102	1.28196	0.954659	1	1.16337	1.03682	1.04981	1.29627	1.0894
SPAC2H10.02c	1	1.69307	1.77513	2.33511	1.47261	1.08192	1	0.788689	0.988572	0.895732	1.49335	1.07124
SPAC30.01c	1	1.40112	1.20673	5.98025	1.60967	1.07739	1	0.932602	0.867469	0.591238	0.567866	0.866032
SPAC30.04c	1	1.24575	1.76777	1.37079	1.33785	1.28722	1	1.28194	1.11496	0.948305	1.14424	1.03585
SPAC30C2.02	1	0.44858	0.473176	0.338582	0.438408	0.628194	1	0.813077	0.669267	0.461115	0.448845	0.365483
SPAC30C2.04	1	0.992687	0.607329	0.516192	0.747445	0.723289	1	0.928004	0.935989	0.875751	0.875361	0.871329
SPAC30C2.06c	1	0.805426	0.992873	0.824615	0.972564	1.1434	1	1.11434	1.29315	1.19431	0.571908	0.864891
SPAC30C2.08	1	1.4243	1.20869	2.1353	1.39768	1.3629	1	1.00771	1.33182	1.26374	1.31707	1.66519
SPAC30D11.03	1	0.433649	0.326152	0.286158	0.752616	1.12481	1	0.82373	1.1179	0.767059	0.729042	0.803232
SPAC30D11.04c	1	1.09812	1.33151	1.72292	1.2187	1.22972	1	0.943049	0.968737	1.06829	0.979821	1.06568
SPAC30D11.11	1	1.48066	1.08355	1.48342	0.735546	1.0737	1	1.59419	2.21682	1.96245	1.58845	1.55061
SPAC30D11.12	1	1.1479	0.821784	0.674717	0.527731	0.552104	1	0.946402	0.882603	0.856462	0.98926	0.833699
SPAC30D11.13	1	0.758644	0.843189	0.797249	1.00763	1.03343	1	1.09683	1.03682	1.0286	0.656744	0.848095
SPAC31A2.02	1	0.86917	0.401121	0.318375	0.643839	0.614995	1	1.1069	1.24439	0.771612	1.05344	1.1843
SPAC31A2.03	1	1.35485	0.881169	0.603853	1.29654	0.852609	1	1.12095	1.31604	0.97515	0.674	1.04445
SPAC31A2.04c	1	1.86051	1.63331	2.07048	1.6717	1.00256	1	1.33867	1.09972	1.31122	1.94845	1.8636
SPAC31A2.07c	1	0.655968	0.547396	0.432896	0.610555	1.36021	1	1.33486	1.2373	0.957578	1.06035	0.857134
SPAC31A2.09c	1	1.02798	1.53125	1.17911	1.43009	1.33625	1	0.760898	0.792757	0.678844	0.86879	0.795584
SPAC31A2.12	1	2.14321	4.01709	2.76002	1.41502	1.3061	1	1.30789	0.897916	1.12852	1.42977	1.39571
SPAC31G5.04	1	1.02732	1.02011	0.460956	0.83014	0.84672	1	1.30355	1.19418	1.0777	1.05931	1.06758
SPAC31G5.05c	1	0.984089	0.767035	0.834985	0.995163	0.864338	1	1.16787	1.09265	1.08134	0.874817	1.48617
SPAC31G5.10	1	0.782051	0.61156	0.248123	0.569629	0.685326	1	1.51022	0.914392	1.09025	1.19623	0.852794
SPAC31G5.13	1	1.56836	1.17813	2.92972	1.44048	0.989612	1	1.10721	1.35327	1.36266	1.49761	1.3203
SPAC31G5.14	1	1.20879	1.05798	0.563403	0.99438	0.807595	1	1.07662	1.37189	1.31178	1.25489	1.30346
SPAC31G5.16c	1	1.08218	1.04282	1.09203	0.812334	0.784472	1	0.970174	0.85253	0.658919	0.816652	0.693361
SPAC31G5.17c	1	0.97862	0.612871	0.49034	0.420702	0.494422	1	0.914374	0.906826	1.03903	0.945492	1.10856
SPAC31G5.19	1	1.1977	1.81001	1.23091	1.13024	1.46395	1	0.737751	0.699026	0.681902	1.29328	0.566941
SPAC323.02c	1	1.09452	1.40489	1.62978	1.19017	1.07268	1	1.20841	1.572	1.12435	1.2033	1.62211
SPAC323.04	1	0.996665	0.821804	1.36706	1.11547	0.782421	1	1.15108	1.06576	0.999302	1.15188	1.10962
SPAC328.02	1	1.46847	2.00859	1.13203	1.54548	1.95527	1	0.711926	0.715476	0.829287	0.644467	0.947597
SPAC328.03	1	3.60659	8.63541	10.1834	4.92844	2.82627	1	1.04977	1.15995	1.42555	1.57375	1.64677
SPAC328.06	1	1.14414	1.93131	1.5188	1.19468	1.54278	1	1.15312	1.10549	1.04223	1.18336	0.968542
SPAC328.09	1	0.74358	0.56982	0.627304	0.623884	0.558997	1	0.889908	0.946486	0.903988	0.426275	0.805814
SPAC343.01c	1	0.96007	0.994848	0.716334	0.86829	1.23271	1	0.946583	0.959912	1.35422	1.1232	0.730966
SPAC343.04c	1	1.34255	2.64305	2.52414	1.62895	1.70641	1	0.883036	1.22003	1.09861	1.66361	1.39069
SPAC343.05	1	0.8453	1.04576	1.10694	1.26264	1.0399	1	1.17151	1.28633	1.16338	1.25819	1.23412
SPAC343.09	1	1.37877	2.04239	4.06804	2.46978	1.74183	1	0.833863	0.897916	1.02564	0.910383	1.19442
SPAC343.10	1	1.44794	1.21805	1.57585	1.28428	0.929806	1	1.36085	0.878781	0.946603	1.04013	0.877504
SPAC343.12	1	7.37486	11.8009	17.0606	6.50565	1.74198	1	1.63787	2.51131	4.52083	6.97098	5.10369
SPAC343.14c	1	1.10615	0.685039	0.781951	0.856322	0.933519	1	1.09311	0.90105	1.23385	0.659227	0.88149
SPAC343.16	1	0.998675	0.613314	0.47975	0.574118	0.663125	1	0.891643	0.998171	0.87815	0.796271	0.872779
SPAC3A11.02	1	1.09862	1.41951	1.16044	1.17648	1.48357	1	0.794732	0.680499	1.02096	0.960484	0.70618
SPAC3A11.07	1	0.962597	1.60782	0.910766	0.54192	0.723287	1	1.09618	1.0872	1.05407	0.950668	0.824098
SPAC3A11.10c	1	1.23091	1.50683	1.71377	1.83295	1.28343	1	0.91745	1.52616	1.15968	1.84054	1.69992
SPAC3A11.11c	1	1.00417	1.30158	1.29993	1.49453	1.11304	1	1.5854	1.45125	1.40175	1.18396	1.31051
SPAC3A11.12c	1	1.72622	1.71653	2.24172	1.52383	1.40732	1	1.12177	1.3282	1.12897	1.20549	1.25596
SPAC3A12.05c	1	1.11491	0.74819	1.11224	1.04258	0.83456	1	0.704812	0.827099	0.725801	0.959119	0.904524
SPAC3A12.07	1	1.42625	0.828313	0.872812	0.900167	0.772977	1	1.01819	0.920311	0.714547	1.25684	0.59215
SPAC3A12.10	1	0.870992	0.628012	0.566337	0.557173	0.506876	1	1.04853	0.900253	0.93515	0.929735	0.845111
SPAC3A12.11c	1	0.649127	0.87766	0.677198	0.642558	0.729393	1	0.616546	0.846563	0.629456	0.8088	0.911675
SPAC3A12.13c	1	0.874083	0.66185	0.741701	0.82429	0.74511	1	0.871928	0.937842	1.36529	1.47666	0.98871
SPAC3A12.17c	1	1.54214	2.10711	1.45543	2.1507	1.81294	1	0.523157	0.818587	0.778595	0.841826	0.779602
SPAC3A12.18	1	2.04488	4.00435	7.96193	3.44006	1.65001	1	1.40711	1.40775	1.82612	2.06813	2.16038
SPAC3C7.08c	1	0.763064	0.373555	0.52573	0.739582	0.755477	1	1.02343	0.949449	0.91224	0.855219	0.771047
SPAC3C7.10	1	0.930103	1.52809	1.55273	1.73435	1.50192	1	1.06789	1.90477	1.18494	1.3564	1.60355
SPAC3C7.11c	1	1.55051	1.35864	1.63061	1.82929	1.3828	1	1.03124	1.04483	1.11685	0.981193	0.988845
SPAC3C7.12	1	1.47708	1.11305	1.32612	0.989731	0.97273	1	0.701741	1.06243	0.935562	1.27882	0.798455
SPAC3C7.14c	1	1.67751	2.36229	4.93687	6.39454	3.9114	1	1.01472	1.29551	1.53394	2.36831	2.72503
SPAC3F10.03	1	0.881959	0.549047	0.5232	0.386978	0.408275	1	1.16616	1.06727	1.11675	1.0807	0.936298
SPAC3F10.04	1	1.27235	1.14847	1.77965	1.04053	0.799941	1	1.25319	1.17639	1.19235	1.23174	1.17279
SPAC3F10.11c	1	1.00346	1.44156	1.98302	1.8557	1.84288	1	1.2476	1.03551	0.986169	1.10819	1.10808
SPAC3F10.13	1	2.01525	2.08466	3.07876	1.18814	1.6243	1	1.60776	3.01096	1.935	2.3231	3.2071
SPAC3F10.16c	1	0.415588	0.403906	0.453696	0.530731	0.907236	1	1.0271	1.13986	1.09523	0.992796	0.874742
SPAC3F10.17	1	0.526747	0.528088	0.517717	0.697464	1.22742	1	0.871928	0.897916	0.844504	0.774367	0.749017
SPAC3G6.03c	1	1.19533	1.51235	1.22711	1.1088	1.23943	1	1.37469	1.2485	1.16407	1.11625	1.10756
SPAC3G6.04	1	0.400616	0.372493	0.250196	0.583242	0.980834	1	1.08749	0.883387	1.02661	1.00875	0.888591
SPAC3G6.05	1	1.16749	1.31803	0.629432	0.577781	0.499988	1	0.899857	1.15025	1.23257	1.18045	0.929042
SPAC3G6.06c	1	1.36141	1.78181	1.12631	0.771161	0.867973	1	0.862985	0.936778	0.753418	0.837187	0.971898
SPAC3G6.09c	1	1.14486	1.2756	2.45146	1.16432	1.10126	1	0.711926	0.876276	0.658033	0.986635	0.667278
SPAC3G9.04	1	1.30993	0.636436	0.734346	1.06561	0.851323	1	1.03168	0.96523	1.2238	0.841826	0.749017
SPAC3G9.05	1	0.630072	0.509944	0.653003	0.983658	0.992315	1	1.54752	1.168	1.08479	0.716924	1.07284
SPAC3G9.06	1	1.22962	0.733073	0.683712	0.820369	0.837193	1	1.24383	1.06429	1.13693	1.03061	1.05742
SPAC3G9.09c	1	0.908417	0.978036	0.700689	0.74767	0.782078	1	0.937844	1.08001	0.935347	0.972626	0.95236
SPAC3G9.12	1	0.675335	0.748066	1.05987	1.39633	1.04679	1	0.820893	1.16504	1.16685	0.567559	0.873313
SPAC3G9.15c	1	0.84277	0.681649	0.825294	0.787833	0.905199	1	0.834808	1.33853	0.985255	0.887362	0.882725
SPAC3H1.02c	1	1.02318	1.37956	0.86087	0.848347	1.36459	1	1.07684	1.04227	0.8621	1.13475	0.768475
SPAC3H1.05	1	0.966461	1.20253	0.916039	1.04658	1.32438	1	1.08466	1.17011	1.1566	1.08386	1.0764
SPAC3H1.07	1	0.837276	0.521268	0.378712	0.803015	1.01389	1	1.16071	1.05895	1.00784	0.936407	1.05235
SPAC3H1.09c	1	0.915213	1.14657	1.68924	1.03275	1.02298	1	0.807249	1.73683	1.34072	1.2679	1.31051
SPAC3H1.12c	1	0.809721	0.638898	1.58844	0.78356	0.6438	1	0.716362	1.33686	1.36825	0.926597	1.29734
SPAC3H5.06c	1	1.19076	1.11448	2.18308	1.47343	1.68073	1	0.895821	0.70075	0.73458	0.696104	0.574301
SPAC3H5.07	1	0.755507	0.610062	0.356347	0.439164	0.530037	1	0.920035	0.922552	0.932392	0.91696	0.802836
SPAC3H5.09c	1	1.07328	1.25493	2.16724	1.1987	0.856087	1	1.13916	0.84552	1.25526	1.42483	1.41551
SPAC3H5.12c	1	1.2118	0.712088	0.634553	0.534696	0.546026	1	1.03602	1.23999	1.15408	1.13714	1.00531
SPAC3H8.02	1	1.31056	1.66432	1.07253	1.18091	1.14594	1	1.2032	1.38803	1.06083	0.914484	1.22587
SPAC3H8.07c	1	1.19696	1.09762	0.889239	0.910684	1.08784	1	0.862399	0.790129	1.03109	0.974549	0.777177
SPAC3H8.10	1	1.27117	2.07587	1.45824	0.968397	1.17801	1	1.05139	0.915352	0.998884	0.993851	1.00161
SPAC458.02c	1	1.02321	1.05107	0.774636	0.944239	1.04142	1	1.05261	0.930486	1.06851	0.988278	0.98542
SPAC458.03	1	1.26643	1.87912	1.78987	1.52155	1.24877	1	1.15345	1.85473	1.0343	2.10132	2.23314
SPAC4A8.03c	1	1.20825	0.70989	0.501694	1.10631	0.737277	1	0.817941	1.28388	0.755348	1.23546	0.835564
SPAC4A8.04	1	1.86492	4.00134	3.24489	2.92398	2.46013	1	1.22203	1.63936	1.90516	2.022	1.88735
SPAC4A8.05c	1	1.00275	0.73463	0.700686	0.651767	1.42919	1	1.27104	1.74523	1.5893	1.20569	1.57907
SPAC4A8.11c	1	0.806764	0.650189	0.757146	0.68979	0.737316	1	1.08546	1.06958	0.969978	0.935105	0.968765
SPAC4A8.12c	1	0.873182	1.09073	1.16064	0.986799	0.926811	1	0.995361	0.865504	0.880058	1.20125	0.973518
SPAC4A8.13c	1	0.946136	1.38974	1.78375	1.35112	1.22694	1	1.34275	1.18861	1.35467	1.27882	1.41793
SPAC4A8.14	1	0.834582	1.12348	1.55578	1.12139	1.07219	1	1.11363	1.33182	0.730219	0.932096	0.936272
SPAC4A8.16c	1	0.96282	0.924116	0.673155	0.879016	1.15037	1	1.13343	1.11627	1.10158	1.09059	1.03811
SPAC4C5.01	1	0.929166	0.896225	0.846393	0.791787	0.968741	1	0.959731	0.857226	0.884174	0.678463	0.568919
SPAC4C5.02c	1	1.02381	1.35606	1.06972	1.28662	1.36798	1	1.026	1.08743	1.08857	0.890245	1.14414
SPAC4D7.04c	1	0.690313	0.678605	0.611537	0.662251	0.810331	1	1.15829	0.679783	0.70267	0.72993	0.633989
SPAC4D7.05	1	0.690542	0.793122	0.624214	0.78153	0.772849	1	1.22419	1.0859	1.12554	1.26796	1.06679
SPAC4D7.08c	1	1.51421	0.729993	0.556981	0.833519	0.838278	1	1.13829	1.05838	1.09174	1.00247	0.895247
SPAC4D7.09	1	0.901636	0.794086	0.641818	0.787786	0.906924	1	1.29236	1.22038	0.999231	1.10749	1.07569
SPAC4D7.13	1	0.960825	1.3262	1.08851	1.00403	1.35794	1	0.947658	0.92009	0.825824	0.678199	1.10781
SPAC4F10.02	1	1.04112	1.65285	1.43144	1.54073	1.40593	1	0.817621	0.917989	1.08705	1.12726	0.883334
SPAC4F10.06	1	0.428167	0.411846	0.307715	0.616094	0.869765	1	0.92482	1.3012	1.01472	0.714885	0.700641
SPAC4F10.09c	1	0.426184	0.376811	0.399716	0.608476	0.844565	1	1.06192	0.871106	0.930488	0.793897	0.860053
SPAC4F10.10c	1	0.782935	0.734838	0.89027	0.917155	0.787156	1	1.05428	0.855521	0.845787	0.863493	0.832178
SPAC4F10.11	1	0.906023	1.26016	1.26185	0.917213	1.10964	1	0.68932	0.927363	0.849766	1.04741	0.972334
SPAC4F10.13c	1	0.994861	1.47639	0.959585	0.973781	1.19235	1	0.908389	1.03799	1.18399	1.02995	1.13198
SPAC4F10.14c	1	1.31913	0.78151	0.52361	0.635828	0.536509	1	1.00471	0.853274	0.878963	0.91699	0.825284
SPAC4F10.15c	1	0.930861	1.20815	0.736826	1.31333	1.2326	1	0.668217	0.75761	1.06882	0.75337	0.847151
SPAC4F10.20	1	3.06133	3.65007	3.76425	5.43379	2.08935	1	0.998919	1.20468	2.36988	5.00215	5.1792
SPAC4F8.01	1	0.780467	0.996656	0.899362	1.54109	1.29199	1	0.705425	0.692001	0.724683	0.689747	0.638764
SPAC4F8.02c	1	1.1946	0.955835	1.0958	1.28325	0.842844	1	1.53364	1.3217	1.10967	1.22438	1.16774
SPAC4F8.03	1	1.0602	0.732835	0.607867	0.636649	0.776042	1	0.891178	0.961577	1.04044	1.00375	0.800038
SPAC4F8.05c	1	0.918274	0.702992	0.58447	0.461436	0.467505	1	0.653946	0.846563	1.76641	0.825478	1.32409
SPAC4F8.07c	1	0.838569	0.979108	0.709172	0.707898	0.743131	1	0.974261	1.08626	1.08478	1.11157	1.08281
SPAC4F8.12c	1	0.894168	1.3065	1.79783	1.26871	1.13089	1	1.18487	1.10142	0.997633	1.22176	0.963445
SPAC4F8.14c	1	1.17205	1.09455	0.883126	1.01503	0.934587	1	0.99541	0.974354	0.912509	0.783078	0.87989
SPAC4G9.03	1	0.979591	1.15329	0.705155	0.8222	0.895437	1	1.28761	1.25387	1.05128	1.28889	1.14341
SPAC4G9.09c	1	1.102	1.33219	0.852426	0.897163	1.17621	1	1.16012	1.24666	1.10576	1.12416	1.13338
SPAC4G9.10	1	1.15312	1.33078	0.684239	0.899089	1.26519	1	0.946652	1.04414	0.862668	0.734037	0.89366
SPAC4G9.11c	1	1.73205	3.45999	4.2968	1.95716	1.1993	1	1.9301	2.27507	1.96245	1.99941	2.53526
SPAC4G9.12	1	1.84944	1.58212	1.42239	0.971698	0.631796	1	1.3358	1.13578	1.26261	1.37314	1.02764
SPAC4G9.13c	1	1.12713	1.85278	1.34103	1.24645	1.03943	1	0.834808	1.14252	0.618114	0.966701	0.755921
SPAC4G9.15	1	0.845614	1.10889	1.14439	0.883373	0.833051	1	1.12232	1.13003	1.45272	1.21728	1.23696
SPAC4G9.16c	1	0.920958	0.638874	0.518919	0.452562	0.458852	1	1.46692	1.17848	0.941483	1.10221	1.1117
SPAC4G9.17c	1	1.11636	1.13372	0.65564	1.09164	1.1096	1	0.761946	0.861818	0.673681	0.456225	0.749017
SPAC4H3.01	1	0.822981	1.1005	0.806208	0.911192	1.00205	1	1.29268	1.41633	1.06898	1.25099	1.30044
SPAC4H3.07c	1	1.04354	1.2393	0.970039	1.12422	1.07508	1	2.36119	2.33125	3.02532	3.83647	3.38825
SPAC4H3.10c	1	1.13798	0.865792	0.706805	0.869128	0.844557	1	0.94435	1.00832	0.991379	1.00919	1.01152
SPAC513.05	1	1.61308	1.55107	2.36192	1.85708	0.964848	1	1.04902	1.02549	1.08728	1.36619	1.66335
SPAC513.07	1	3.73669	5.61714	8.18023	4.0871	2.34486	1	1.30044	1.67985	2.03901	2.60802	2.77886
SPAC521.03	1	1.64224	2.79278	3.28958	3.16005	2.38624	1	1.0149	1.13693	1.09181	1.3509	1.53617
SPAC56E4.03	1	1.42961	1.06839	1.15725	1.49397	0.915919	1	1.062	1.09496	1.10808	1.24658	1.19898
SPAC56E4.06c	1	1.44014	1.94989	1.83516	1.61931	1.41504	1	1.58394	1.19722	0.990269	0.990573	1.05927
SPAC56E4.07	1	1.33323	0.996307	0.787564	1.04151	0.754559	1	1.35726	0.909354	1.57992	1.3271	1.58664
SPAC56F8.04c	1	0.866698	1.09389	1.06298	1.14006	1.22843	1	1.13015	1.03682	0.925108	1.14382	1.64101
SPAC56F8.05c	1	0.774757	0.773334	0.653885	0.48891	0.494808	1	0.897602	0.962737	0.822064	0.683468	0.705372
SPAC56F8.08	1	1.17457	1.25283	1.53942	1.3687	1.01508	1	0.683997	0.757189	1.0343	0.906581	1.07276
SPAC56F8.10	1	0.789377	0.614485	0.430227	0.82977	1.2108	1	0.852008	0.829351	0.773539	0.827395	0.901012
SPAC56F8.11	1	0.894206	0.773146	1.04727	0.840754	0.83356	1	1.21087	0.876276	1.31122	1.25578	1.22587
SPAC57A10.09c	1	2.19113	4.27619	3.81444	1.72458	1.09602	1	1.21004	1.05585	1.33528	1.13673	1.07442
SPAC57A10.10c	1	0.592647	0.289412	0.288944	0.50318	0.916168	1	0.966415	0.921821	0.916811	0.800047	0.914601
SPAC57A10.11c	1	1.40414	1.25389	1.79338	1.12773	0.987825	1	0.889908	0.86402	0.817688	0.976719	0.976998
SPAC57A10.12c	1	0.411764	0.306324	0.182642	0.465293	0.701733	1	1.08112	0.977564	0.886919	0.854493	0.838924
SPAC57A7.05	1	2.99419	2.45906	2.47751	1.04075	0.731751	1	1.41269	1.21578	1.47788	0.825478	1.80905
SPAC57A7.06	1	0.473709	0.3957	0.406894	0.739088	0.869701	1	0.988674	1.09246	0.904826	1.08389	0.730966
SPAC57A7.07c	1	1.07708	1.01594	1.52162	1.20933	0.906278	1	0.653946	0.92009	1.20175	0.756563	1.02563
SPAC57A7.10c	1	1.12496	0.925562	1.45691	1.17562	1.06316	1	1.27696	1.20551	1.03179	0.899569	1.00215
SPAC57A7.12	1	0.661497	0.544389	0.270335	0.595311	0.708299	1	0.910777	0.889437	0.918453	0.849332	0.878796
SPAC589.04	1	1.16846	0.810781	1.04453	1.22316	1.05522	1	1.48164	1.60065	1.40045	1.11363	0.891509
SPAC589.06c	1	1.35768	1.10583	1.08877	1.10605	0.971123	1	0.804845	0.777668	1.06666	0.856281	0.85727
SPAC589.09	1	1.18235	1.63552	1.21403	1.24124	1.37548	1	1.04762	0.85763	0.671144	1.05198	0.64948
SPAC5H10.03	1	0.960571	0.784007	0.619115	0.545811	0.564633	1	1.1055	1.31184	1.08743	1.14482	1.19599
SPAC5H10.05c	1	1.41414	1.25127	2.01402	2.00375	1.64537	1	0.910197	0.814845	1.11624	0.990573	1.24873
SPAC5H10.06c	1	0.954266	0.324422	0.215846	0.439839	0.528142	1	1.42727	1.99863	1.38238	1.38129	1.21264
SPAC5H10.08c	1	1.04422	0.994354	0.739828	0.900053	1.02266	1	0.986474	0.96523	0.913471	1.17206	0.957259
SPAC5H10.10	1	0.819817	1.04131	0.670618	1.03882	1.03815	1	1.4006	1.12954	1.22495	0.990573	1.18638
SPAC5H10.12c	1	0.995756	1.25093	1.43206	1.5191	1.44227	1	1.05446	1.1199	1.29115	1.04416	0.917355
SPAC5H10.13c	1	1.16099	0.554279	1.18476	0.941631	0.809663	1	1.35522	1.00917	0.97258	1.29886	0.787453
SPAC607.03c	1	0.943786	0.507492	0.402734	0.48162	0.546954	1	0.927122	0.948842	0.861592	0.694715	0.727038
SPAC607.05	1	0.940478	1.21472	1.64075	1.23623	1.05406	1	1.23912	1.10917	1.2101	1.23961	1.26717
SPAC607.07c	1	1.48377	1.55885	0.917535	1.2725	0.857123	1	0.902531	0.564763	0.95142	0.614328	0.906652
SPAC630.03	1	1.04648	1.44935	1.93544	1.32079	0.912718	1	1.21108	1.21514	1.24646	1.22866	1.16976
SPAC630.08c	1	0.770938	1.21397	0.992403	1.20759	0.995661	1	0.848673	0.651416	0.850042	0.867837	0.92137
SPAC630.09c	1	1.27892	1.41696	2.07799	1.51372	0.998533	1	0.752964	0.988572	0.793161	0.883475	1.01783
SPAC630.12	1	0.825472	1.12976	0.946084	1.25244	1.35245	1	1.14056	1.14625	0.881239	0.660382	0.793908
SPAC630.13c	1	0.771647	1.08042	1.31653	1.29961	0.991089	1	1.34694	1.30776	1.40045	1.69173	1.21384
SPAC630.14c	1	1.06495	1.66899	2.01578	1.3704	1.24793	1	0.864379	1.0298	1.08759	1.07691	1.00936
SPAC631.01c	1	1.06719	1.1763	1.39789	1.09183	1.00016	1	1.13894	1.0407	1.16789	0.717739	1.19462
SPAC637.04	1	1.1131	1.81912	1.19862	1.38432	1.61599	1	1.13364	1.10669	1.20306	1.45826	1.3451
SPAC637.05c	1	1.37927	0.956115	1.28257	1.14831	1.24929	1	1.01596	0.999727	0.986784	1.12611	1.16959
SPAC637.07	1	0.908308	0.59627	0.6469	0.73456	0.618562	1	1.13604	1.01618	1.06359	0.976662	0.960847
SPAC637.08	1	1.28088	1.0208	0.821497	0.970612	0.864218	1	0.871928	0.822711	0.912169	0.85255	0.948901
SPAC637.09	1	0.715628	0.516103	0.451035	0.727462	1.00146	1	0.475914	0.75125	0.731362	0.602844	0.712588
SPAC637.10c	1	1.29595	1.17216	1.47691	1.31546	0.938733	1	1.13059	1.08689	1.0706	1.19904	1.30208
SPAC637.13c	1	2.08694	3.12363	3.92641	1.47947	1.02019	1	1.54576	1.59985	1.58277	1.36209	1.66151
SPAC644.05c	1	1.29236	0.504239	0.43199	0.978541	1.46636	1	1.09946	0.97951	1.22271	1.16155	0.924336
SPAC644.08	1	1.04062	1.20943	1.55219	1.19163	1.13084	1	1.60776	1.47441	1.28075	1.18286	1.59543
SPAC644.12	1	1.34212	1.12746	1.38405	1.17202	1.10543	1	1.16981	1.15083	1.22729	1.10602	0.970837
SPAC644.13c	1	1.46856	1.10925	1.22797	1.17165	1.22464	1	1.13428	1.05657	1.28289	1.1216	1.0894
SPAC644.15	1	1.18897	0.601918	0.271504	0.509839	0.433984	1	1.1086	1.14343	0.917852	0.935498	1.01728
SPAC644.16	1	1.01446	1.31149	0.949691	1.21685	1.26882	1	0.866321	1.01443	1.11102	1.2512	1.10939
SPAC644.17c	1	0.935363	1.25271	0.856285	1.38994	1.2723	1	0.683024	0.827099	0.961198	1.15674	1.20211
SPAC664.02c	1	0.951386	1.25229	0.734566	0.956127	1.25346	1	0.890681	1.05359	0.792411	0.442195	0.747659
SPAC664.03	1	0.857841	0.916056	0.809653	0.766404	0.710704	1	1.17128	0.86933	1.18981	0.784098	0.977822
SPAC664.05	1	1.17268	0.781945	0.691818	0.705288	0.642055	1	0.978085	1.0079	1.04309	0.997829	0.908111
SPAC664.06	1	0.360627	0.245201	0.344412	0.41107	0.742377	1	1.22297	1.44856	1.29566	0.691403	0.957634
SPAC664.08c	1	0.227192	0.272043	0.336558	0.614845	0.994259	1	0.741358	0.744149	0.642885	0.562059	0.818838
SPAC664.10	1	1.24019	1.8332	1.44849	1.46072	1.53916	1	1.16981	1.19722	2.23435	1.86784	1.61806
SPAC664.11	1	1.45223	0.910527	1.18559	1.25948	1.04766	1	0.951783	0.87734	0.92596	0.858595	0.960201
SPAC688.04c	1	5.60789	11.4822	17.3154	4.27205	2.65578	1	1.46767	2.17266	1.86939	2.06204	2.15549
SPAC688.07c	1	1.41281	0.888582	1.04394	0.736608	0.949378	1	0.662277	0.753017	0.727333	0.692269	0.848095
SPAC688.11	1	1.29947	1.32015	1.92291	1.16231	1.09708	1	1.0846	1.17038	1.13777	1.02694	1.1206
SPAC694.02	1	1.15668	0.723808	0.917417	0.899113	0.82636	1	1.10371	1.12556	1.0655	1.0274	1.00448
SPAC694.04c	1	1.22638	1.17575	0.514028	0.575604	0.912752	1	1.11938	0.860643	0.848429	0.927008	0.748112
SPAC694.05c	1	1.13291	0.827126	0.579461	0.619374	0.567559	1	0.993975	1.17258	1.32689	1.1735	1.05243
SPAC6B12.02c	1	1.09316	1.59587	1.8812	0.941666	1.08089	1	1.30789	1.44578	1.11717	1.47666	1.24836
SPAC6B12.04c	1	1.09714	1.49306	1.00102	1.32254	1.13277	1	0.933508	0.920691	0.918453	0.66304	0.895728
SPAC6B12.09	1	1.01023	0.83132	0.800078	0.756629	0.774779	1	0.755112	0.777618	0.757032	0.837187	0.64285
SPAC6B12.12	1	1.08939	1.35623	1.11708	1.24629	1.04577	1	1.01816	1.04551	0.982739	0.995324	0.961148
SPAC6B12.15	1	0.939888	0.779113	0.393331	0.571613	0.644557	1	1.18819	1.08321	1.2002	1.17497	0.958862
SPAC6C3.04	1	1.27601	1.40432	0.713723	0.526208	0.477207	1	1.18325	1.2084	1.10812	1.05236	0.990169
SPAC6C3.08	1	1.40296	2.20138	2.02043	1.80194	1.65568	1	1.01309	1.14051	1.11877	1.27882	1.16037
SPAC6F12.05c	1	1.36246	1.04232	1.43993	0.957488	0.79741	1	1.12896	0.997977	1.18991	0.968476	0.930748
SPAC6F12.06	1	1.00794	1.07709	1.90498	1.40588	1.15857	1	1.05554	1.13361	1.02983	1.15424	1.17405
SPAC6F12.07	1	1.36587	1.12842	1.01823	0.713423	0.650181	1	1.58784	1.31909	1.26315	1.17444	1.0863
SPAC6F12.10c	1	0.800993	0.643462	0.544363	0.989276	0.832602	1	1.01633	1.07621	1.03174	1.06682	1.05915
SPAC6F12.13c	1	1.01258	1.16622	1.06994	0.866892	0.930988	1	1.20409	1.43902	1.00611	1.1789	1.43763
SPAC6F12.16c	1	0.995903	0.441179	0.414905	0.549615	0.649215	1	0.92433	0.930119	1.00262	0.95318	0.769301
SPAC6F12.17	1	1.07622	1.5348	0.954791	1.39444	1.6602	1	1.19337	0.924725	0.969813	1.23129	0.941186
SPAC6F6.03c	1	0.547199	0.385006	0.495647	0.590994	0.966967	1	0.826005	0.94891	0.916544	0.525968	0.687399
SPAC6F6.07c	1	1.14573	1.00541	0.674378	0.763668	0.712876	1	0.890562	0.794745	0.770009	0.804413	0.770304
SPAC6F6.10c	1	1.1148	1.3129	2.33645	1.63139	1.05351	1	1.04197	1.23801	1.43814	1.55766	1.51834
SPAC6F6.11c	1	1.02827	1.74318	1.0475	1.93918	2.01422	1	1.15879	1.30152	1.19043	1.27882	1.14785
SPAC6F6.12	1	1.55974	2.28386	1.62985	1.57587	1.42373	1	0.788689	1.35752	1.26676	1.26211	1.41551
SPAC6F6.15	1	0.917305	1.3127	1.22136	1.53473	1.20936	1	1.01339	1.23924	1.15968	1.15959	1.14717
SPAC6G10.02c	1	0.913259	0.901261	0.948927	0.739144	0.795151	1	1.12001	1.20617	0.757705	0.730909	0.807103
SPAC6G10.03c	1	1.79862	3.57516	4.63205	4.28792	2.25525	1	0.817941	1.03682	1.26676	1.92533	1.34221
SPAC6G10.04c	1	1.13202	1.34326	2.43753	1.59297	1.11947	1	0.846955	0.890076	0.919585	0.866357	0.973751
SPAC6G10.05c	1	0.895823	1.15549	1.87454	1.40766	1.38267	1	1.80339	0.946486	1.54185	0.920859	0.930474
SPAC6G10.07	1	1.22906	1.49516	1.00696	1.21184	1.5271	1	1.1015	0.923676	0.881055	0.847314	0.826275
SPAC6G10.08	1	1.18065	1.17792	1.14616	1.53254	1.07328	1	1.19358	1.1265	1.15311	1.21769	1.25021
SPAC6G10.09	1	1.10905	0.780137	0.946822	0.886176	0.826085	1	1.09417	1.10131	0.989738	1.02002	0.951909
SPAC6G9.02c	1	0.498167	0.31146	0.512748	0.547555	0.708303	1	1.19089	0.82117	0.899524	0.70678	0.829779
SPAC6G9.06c	1	0.932092	1.0077	0.9062	1.36586	1.94004	1	1.93992	1.08743	1.00811	0.904266	1.40128
SPAC6G9.07c	1	1.14383	1.57889	1.40124	1.38282	1.20388	1	0.972597	0.721223	0.932363	0.513588	0.902438
SPAC6G9.10c	1	0.549871	0.457838	0.390713	0.76205	0.843836	1	1.02751	0.94036	0.462554	0.576502	0.594057
SPAC6G9.12	1	0.792906	1.04551	0.901167	0.950209	0.914135	1	0.660326	0.989265	1.16059	1.01015	1.15915
SPAC732.02c	1	1.40258	2.05779	1.85107	1.53361	1.5993	1	0.852641	1.02378	0.789962	1.04416	0.683756
SPAC7D4.02c	1	0.888974	0.703154	0.603449	0.678087	0.715974	1	0.919093	1.14625	1.32535	1.10064	0.804022
SPAC7D4.04	1	0.839945	1.08445	0.987819	1.31921	1.15072	1	0.760644	1.23193	1.14956	1.011	1.22145
SPAC7D4.07c	1	2.74765	3.08417	5.2866	3.1509	1.95383	1	1.34845	1.43108	1.24526	2.74755	2.50017
SPAC7D4.10	1	1.02142	1.16292	0.998605	1.33241	1.10205	1	1.03479	1.20283	1.02591	1.20993	1.03919
SPAC7D4.11c	1	0.914813	1.20181	1.06893	1.70544	1.36206	1	0.889545	0.688389	0.759192	0.541944	0.783874
SPAC7D4.12c	1	1.86388	1.21633	1.65427	0.907094	0.854105	1	0.68932	0.579602	1.63538	1.38129	1.33142
SPAC806.03c	1	1.0773	0.80575	0.571066	0.620651	0.514595	1	0.591211	0.799382	0.718801	0.55117	0.805265
SPAC806.04c	1	1.29648	1.81771	1.20725	1.20221	1.36321	1	1.24806	1.16421	1.20881	1.30565	1.05642
SPAC806.07	1	1.37375	1.47039	2.38705	2.14546	1.12257	1	0.938243	0.837604	1.1297	1.05781	1.17107
SPAC821.03c	1	1.4348	1.2579	0.895524	0.704557	0.887174	1	0.802057	1.06452	0.840888	0.876798	0.786152
SPAC821.05	1	0.701191	0.708553	0.56185	0.597268	0.701449	1	1.02243	1.02265	1.10073	0.883475	1.04389
SPAC821.06	1	1.13663	0.88836	1.31252	1.35501	1.045	1	0.977868	0.866699	0.95671	1.17751	0.968477
SPAC821.10c	1	2.15811	1.58078	2.3608	1.24439	0.971482	1	1.07164	1.67364	1.24778	1.26342	1.31931
SPAC821.11	1	0.909778	0.873497	0.597494	0.968227	0.889652	1	1.00611	1.30905	1.02718	0.854011	0.832063
SPAC823.05c	1	1.29046	1.11332	1.42524	1.28934	1.37375	1	0.92482	1.77814	1.00342	0.490407	1.1843
SPAC823.06	1	0.930617	1.31825	1.07133	1.1587	1.88701	1	1.15345	0.777618	0.851077	0.452133	0.789534
SPAC823.08c	1	0.362214	0.409754	0.39183	0.556204	0.963659	1	1.11715	0.968445	0.964677	0.894991	0.621628
SPAC823.14	1	1.07525	0.752029	0.729357	0.687151	0.638931	1	1.28191	1.01732	1.19801	1.27485	1.07775
SPAC823.15	1	1.08573	1.44398	1.04059	0.79357	1.39175	1	1.33432	1.03682	0.809301	1.34249	1.07447
SPAC824.02	1	0.821675	0.547605	0.692693	1.14669	0.786532	1	0.783617	0.498074	0.585558	0.541786	0.536382
SPAC824.04	1	0.990887	0.621003	1.09599	1.12269	0.747844	1	0.974845	0.757189	0.789962	0.825478	0.809031
SPAC824.07	1	2.28456	2.99779	5.53771	2.77732	1.56349	1	0.966405	0.947139	0.998	0.934927	0.892413
SPAC824.08	1	0.612633	0.642194	0.595091	1.14913	1.64803	1	1.21881	0.774689	0.902442	0.824236	0.592892
SPAC869.02c	1	2.74728	3.00834	10.5424	5.19589	2.3349	1	1.49668	1.20786	1.47573	2.56335	2.97131
SPAC890.02c	1	0.733441	0.885726	1.14689	1.17632	1.19413	1	0.969094	0.866557	0.752566	0.870386	0.877517
SPAC890.04c	1	0.527675	0.436413	0.430101	0.650031	0.954219	1	1.02956	0.954635	0.807169	0.845409	0.77559
SPAC890.06	1	0.988334	1.28415	1.26378	1.13747	1.4681	1	1.00187	0.951354	0.948207	0.913014	0.908829
SPAC890.07c	1	0.849308	0.480218	0.648935	0.657398	0.824874	1	1.24703	1.22225	1.03814	1.09151	0.829779
SPAC890.08	1	1.0839	0.612964	0.484907	0.478796	0.536948	1	0.97373	0.894507	1.18337	1.00761	0.83924
SPAC8C9.03	1	5.00444	13.1118	10.0581	2.86404	1.15012	1	1.26354	1.63315	1.58053	2.11077	2.05065
SPAC8C9.04	1	1.39614	1.62741	2.02505	1.52228	1.0103	1	0.651518	0.811274	0.932755	0.987224	0.893814
SPAC8C9.05	1	1.02882	1.08675	1.4246	1.09229	0.901839	1	0.875554	0.80312	0.925108	1.06994	0.720742
SPAC8C9.12c	1	1.44339	1.19326	2.70833	1.68974	1.16756	1	1.41269	1.71938	1.2238	1.69173	1.05927
SPAC8E11.02c	1	1.00895	1.08358	0.915994	1.09016	1.0279	1	0.793581	0.838275	0.875971	0.871161	0.935078
SPAC8E11.04c	1	1.04672	1.34545	0.807729	1.35431	1.10054	1	0.958761	0.897008	1.02327	0.77116	0.691994
SPAC8E11.10	1	0.596912	0.260899	0.0577271	0.39354	0.597249	1	0.875893	1.044	1.08481	1.04467	0.892669
SPAC8F11.04	1	0.324184	0.265993	0.255885	0.377626	0.816369	1	0.887928	1.06472	0.90733	0.644654	0.928404
SPAC8F11.08c	1	1.13122	1.75503	1.3848	1.32777	1.10647	1	1.03398	0.846563	0.883204	1.092	1.12526
SPAC8F11.09c	1	0.776234	0.530215	0.500814	0.617419	0.74818	1	1.24446	1.05585	0.933635	1.00474	1.12942
SPAC8F11.10c	1	1.33668	1.17091	0.959518	1.50478	1.46845	1	1.13957	1.08293	0.893587	0.405366	0.732713
SPAC9.02c	1	1.66043	1.02176	1.3449	1.13014	0.968865	1	0.869433	0.927363	1.02871	1.03717	1.03432
SPAC9.03c	1	0.945758	1.11197	1.43555	1.4425	1.32883	1	1.07745	1.00959	0.933635	0.887362	0.854629
SPAC9.07c	1	1.32665	1.08405	0.972223	0.888332	0.8105	1	0.962113	1.01794	1.01752	0.886896	0.936789
SPAC9.09	1	0.887237	0.746723	0.408367	0.760175	0.857518	1	1.09513	0.979547	0.976376	0.977601	0.907717
SPAC922.04	1	1.54092	1.27164	1.28433	1.26549	0.604223	1	1.22342	1.37159	1.18494	1.19623	1.48038
SPAC926.04c	1	1.54495	1.70705	1.48455	1.81528	2.03383	1	0.983457	0.957262	0.984932	0.973612	1.08656
SPAC926.08c	1	0.492119	0.263381	0.372932	0.482701	0.811222	1	1.06202	0.976038	0.829988	0.92575	1.01198
SPAC926.09c	1	0.879402	0.81384	0.751273	0.836761	0.869199	1	1.13693	1.03998	1.06164	1.0457	0.984889
SPAC959.02	1	1.09532	1.71803	1.41204	1.49179	1.8935	1	1.12202	0.977527	0.907252	1.39711	1.04205
SPAC959.03c	1	0.630292	0.410298	0.554992	0.571163	0.859538	1	1.34373	1.75222	1.01052	1.29806	1.32275
SPAC959.07	1	0.9366	0.776581	0.741708	0.72226	0.602319	1	0.983098	0.873937	1.03289	0.898559	0.876545
SPAC9E9.03	1	0.810305	0.638536	0.289089	0.546362	0.634718	1	1.06807	0.957831	1.00415	0.928108	0.880601
SPAC9E9.04	1	3.54006	4.86523	4.92586	1.79355	1.01741	1	0.889908	0.791887	1.27843	0.904266	1.269
SPAC9E9.06c	1	0.823152	0.683532	0.487766	0.88967	0.866058	1	1.01269	1.01415	1.00223	0.999017	0.984751
SPAC9E9.07c	1	1.416	1.30932	1.12622	0.936461	0.895832	1	1.03041	1.12265	0.969881	1.14812	1.1877
SPAC9E9.10c	1	2.56264	2.71511	1.51619	0.926188	1.50369	1	1.02428	1.19122	0.667105	0.626494	0.898821
SPAC9E9.11	1	2.41574	3.4673	5.01607	4.7044	2.97134	1	1.07107	1.13634	1.25798	1.72173	2.05925
SPAC9E9.13	1	2.8644	2.09093	3.04714	2.2438	1.58499	1	1.06534	1.36387	1.38284	1.51313	1.41551
SPAC9G1.02	1	0.912976	0.722937	1.46105	0.851285	0.762752	1	1.1359	0.667352	0.39482	0.603704	0.923161
SPAC9G1.03c	1	1.01867	0.68374	0.458726	0.421828	0.424892	1	1.06408	0.977004	1.05833	0.862736	0.842185
SPAC9G1.05	1	0.852482	1.02652	0.941634	1.02846	1.10862	1	1.22984	0.954423	1.10844	1.14757	1.11236
SPAC9G1.06c	1	1.17159	1.90474	1.37185	1.21419	1.38957	1	0.924109	0.746537	0.815802	0.637937	0.771127
SPAC9G1.11c	1	0.877758	1.21098	1.0428	0.900172	0.839067	1	1.27637	1.07718	1.2014	1.27882	1.31777
SPAC9G1.12	1	0.891431	0.839965	0.72208	1.20195	1.22822	1	1.0085	0.603048	0.970787	0.624003	0.710371
SPACUNK4.06c	1	1.04748	0.776895	0.725312	0.824481	0.835364	1	0.94179	0.746598	1.09025	0.602844	0.683756
SPACUNK4.10	1	1.37864	2.34451	4.28818	4.12097	2.27367	1	1.05646	1.16104	1.27336	1.38701	1.50259
SPACUNK4.12c	1	0.90018	1.32966	1.27254	1.31867	1.08204	1	1.31932	1.13394	1.18643	1.34635	1.22036
SPACUNK4.14	1	1.60713	1.34935	1.75283	1.34537	1.36356	1	0.665946	0.423281	1.0343	0.583701	1.08111
SPACUNK4.15	1	3.894	6.10641	4.11887	1.45422	1.81434	1	1.15452	1.49458	1.94396	1.90016	1.70717
SPACUNK4.16c	1	4.53131	8.91571	10.5969	5.21161	3.62762	1	1.07549	1.23619	1.15705	1.51313	1.86719
SPACUNK4.17	1	28.8444	51.3373	29.5672	4.25336	2.57054	1	3.04071	8.27463	13.0534	13.3673	11.0135
SPAP11E10.01	1	1.48444	1.08533	0.998949	1.04296	1.03246	1	0.936601	1.40109	0.717783	0.60986	0.927357
SPAP14E8.03	1	1.62861	1.34429	1.31581	0.953683	0.78469	1	1.63123	2.19943	1.40045	1.95344	1.30929
SPAP27G11.02	1	1.07644	0.933112	1.36238	1.21566	0.704939	1	1.74804	1.01669	1.40534	1.56623	0.929042
SPAP27G11.06c	1	1.58287	1.02149	0.985989	0.86155	0.84044	1	0.779876	1.03682	0.844504	0.933922	0.82807
SPAP27G11.09c	1	0.992061	1.77181	3.43027	1.84924	1.23829	1	0.812962	0.812195	1.35037	1.09907	1.51496
SPAP27G11.10c	1	0.860034	0.719456	1.1677	0.871086	0.764314	1	0.823449	0.789437	0.787518	0.87697	0.879379
SPAP32A8.02	1	3.1764	3.8813	4.05711	1.30488	0.604697	1	1.51022	1.31441	2.0686	3.61706	2.83102
SPAP8A3.06	1	1.08259	1.43902	1.72747	1.00991	0.963264	1	1.13894	1.44785	1.09704	1.63019	1.23266
SPAP8A3.07c	1	1.06338	0.775982	0.468327	0.66879	0.75938	1	0.914525	0.921594	0.818158	0.853533	0.874412
SPAP8A3.09c	1	0.732577	1.04021	0.90888	1.05106	0.996944	1	1.49837	1.48226	1.13361	1.41614	1.2161
SPAP8A3.12c	1	1.02898	1.75971	3.23697	1.76985	1.1995	1	0.968081	1.08331	1.10983	1.27219	1.17118
SPAPB17E12.11	1	0.976663	1.02729	0.731569	1.04634	0.973245	1	1.04793	1.04638	1.01984	1.05378	1.38325
SPAPB17E12.13	1	1.952	1.14793	1.19952	0.969167	0.738796	1	1.05374	0.904935	1.17765	0.872393	1.18703
SPAPB17E12.14c	1	1.27159	1.78637	1.57193	1.27376	1.25489	1	1.2896	1.29603	0.990269	1.54433	1.43018
SPAPB1A10.04c	1	0.850585	1.11054	1.16466	1.10399	0.922432	1	1.27104	1.52616	0.999231	0.700441	0.683756
SPAPB1A10.09	1	1.05184	0.932051	1.16329	0.891335	0.852765	1	1.41702	1.21287	1.27782	0.866709	0.983037
SPAPB1A10.10c	1	1.12368	0.706187	0.949397	1.13742	0.620093	1	1.16981	1.39104	1.48347	1.72591	1.71427
SPAPB1A10.12c	1	1.42554	1.39844	2.56108	1.4915	1.00692	1	0.918093	1.0821	1.21194	1.43467	1.03433
SPAPB1A10.13	1	1.15735	1.09843	0.81473	1.14093	1.0589	1	0.963953	0.691216	0.680637	0.501596	0.638423
SPAPB1E7.02c	1	0.832898	1.04706	0.854663	1.03778	1.14226	1	1.53364	1.22952	0.867289	0.904266	1.06751
SPAPB1E7.09	1	1.20382	1.34558	1.06973	1.50476	1.30687	1	0.955061	1.17594	1.20026	1.02427	1.11579
SPAPB21F2.02	1	0.744681	0.922809	0.886924	0.788715	1.0425	1	1.21697	1.05683	1.49792	0.95008	0.921977
SPAPB24D3.08c	1	2.10152	2.82031	6.41707	4.58728	2.6778	1	1.13015	1.18216	1.4909	1.71184	1.98625
SPAPB24D3.09c	1	1.46861	2.60327	2.5712	1.06321	1.03967	1	0.844241	1.26984	1.76641	1.38129	1.08111
SPAPB2B4.02	1	1.32057	0.83236	0.557927	0.764236	0.619581	1	1.32756	1.28894	0.882056	1.02015	1.16622
SPAPB2B4.04c	1	1.80996	4.51624	3.5655	2.26834	2.17158	1	0.682768	1.30371	1.45405	1.15511	1.05149
SPAPB2B4.05	1	1.00906	1.49226	1.02291	1.33839	1.25514	1	1.21962	1.07446	0.979446	1.0532	1.23801
SPAPB2B4.07	1	0.968136	0.907948	0.875958	0.946691	0.863581	1	0.888538	0.937842	0.733915	0.585738	0.560233
SPAPB8E5.07c	1	0.514546	0.37259	0.530271	0.54163	0.612366	1	0.842225	0.882013	0.732033	0.611956	0.503224
SPAPB8E5.09	1	0.849621	0.826235	0.876144	0.827112	0.855456	1	0.842622	1.19464	0.81821	0.918872	0.96373
SPAPJ696.01c	1	1.36027	1.37299	1.99606	1.54063	1.27147	1	1.34334	1.07596	1.16272	0.904266	0.993187
SPAPJ696.02	1	1.19519	0.972786	0.844667	0.947667	0.945848	1	1.29311	1.11731	1.38902	1.3781	1.12919
SPAPJ698.02c	1	0.809114	0.705904	0.476659	0.454535	0.526247	1	1.08294	0.988835	1.10837	1.02225	0.928147
SPAPJ698.03c	1	0.755913	0.854152	0.888216	1.1103	1.00403	1	0.886708	0.748135	0.824878	0.554536	0.746167
SPAPJ760.02c	1	1.53178	1.739	2.33656	1.45928	1.07515	1	0.962583	0.92009	1.02673	1.25462	1.27257
SPAPYUG7.05	1	0.876091	0.497911	0.420162	0.57858	0.527067	1	0.791733	0.669529	0.51342	0.698148	0.392438
SPAPYUK71.03c	1	1.21073	1.92972	1.40642	1.96057	1.63307	1	0.901896	0.884815	1.03557	1.14088	1.17679
SPBC106.03	1	1.09332	1.21772	1.35625	1.57175	1.23323	1	1.20078	1.71205	1.47141	1.53899	1.6865
SPBC106.04	1	1.04842	1.82116	1.86937	1.63479	1.44638	1	1.01492	1.10171	1.04423	1.0078	1.15149
SPBC106.05c	1	0.907492	1.06135	1.02038	0.861705	0.605927	1	0.850915	1.07718	0.916811	0.720536	1.01928
SPBC106.11c	1	1.83727	3.50649	4.29575	1.48291	1.20449	1	0.745057	1.10456	1.15944	1.0606	1.35113
SPBC106.14c	1	0.314031	0.256799	0.26044	0.585363	0.886953	1	1.14019	1.2123	0.967106	1.13356	0.872579
SPBC106.15	1	0.883479	0.879273	0.444312	0.634757	0.8159	1	1.21485	1.28145	1.26045	1.22363	0.975423
SPBC106.16	1	1.04621	1.37614	1.78186	1.74468	1.20032	1	0.976995	0.951455	1.0697	1.07215	1.01386
SPBC106.17c	1	1.20785	0.772634	1.09008	0.913664	1.31272	1	1.23613	1.30163	1.14517	1.12037	0.999647
SPBC106.18	1	1.05366	0.75163	0.6022	0.510841	0.423704	1	0.956084	0.642208	0.851962	0.782446	0.907413
SPBC1105.02c	1	1.29524	1.28663	0.838447	1.1233	1.24802	1	1.07438	0.940625	1.02367	1.02886	0.910478
SPBC1105.03c	1	1.29792	0.918203	0.715102	0.860701	0.647603	1	1.27637	0.855158	0.844504	1.04947	0.643005
SPBC1105.04c	1	0.854743	0.783827	0.401603	0.425048	1.04853	1	1.12494	1.09095	0.991187	0.88326	0.72441
SPBC115.01c	1	0.605362	0.395294	0.680953	0.840616	0.814248	1	1.09501	1.23924	1.28473	1.01388	1.13946
SPBC119.01	1	1.22466	1.80846	1.96542	1.79391	1.42899	1	1.07549	1.08935	1.09942	1.32491	1.17064
SPBC119.02	1	1.25173	1.49339	1.28	1.77299	1.45542	1	0.856216	0.765745	0.816625	1.07093	1.01298
SPBC119.03	1	2.23181	2.58196	6.69735	10.1601	5.65142	1	1.12987	1.04828	1.39833	2.3348	2.31985
SPBC119.05c	1	1.38115	2.11923	2.01792	1.55924	1.29915	1	1.51022	1.36223	1.47573	1.79231	1.60355
SPBC119.06	1	0.885937	1.06847	1.15956	0.909584	0.902224	1	2.28169	1.79583	2.45898	2.12906	1.92341
SPBC119.09c	1	1.2748	1.1523	1.6088	1.15163	0.967351	1	1.40594	1.13578	1.57238	1.32076	1.60193
SPBC119.10	1	1.10273	1.05358	0.584819	0.91173	1.00861	1	0.999085	1.07316	0.976937	1.06825	1.04663
SPBC119.12	1	1.2072	0.73416	0.483667	1.04717	1.12221	1	0.937938	1.31149	1.04897	1.43385	1.49803
SPBC119.15	1	0.982481	0.703994	0.727084	0.927589	0.852063	1	0.956426	0.72724	0.828547	0.677595	0.83668
SPBC1198.02	1	0.916126	0.272155	0.115616	0.351622	0.535576	1	1.29102	1.83427	1.64635	1.55616	1.47353
SPBC1198.05	1	0.92191	0.668638	0.755927	0.702823	0.786686	1	1.14162	1.07159	1.02078	1.38257	1.1238
SPBC1198.08	1	1.06037	0.974797	0.925718	0.887667	0.920754	1	1.21275	1.24349	1.24395	1.34414	1.13369
SPBC1198.13c	1	1.27802	1.56702	2.28852	1.85884	1.07871	1	1.25852	1.58848	1.50774	0.95318	1.4142
SPBC11B10.02c	1	0.93166	0.78725	1.05542	1.10545	0.706463	1	1.0337	1.10841	1.06237	1.17535	1.11353
SPBC11B10.07c	1	0.965452	1.88257	2.02385	1.30522	1.29277	1	0.794732	0.800542	0.846127	0.698193	0.593667
SPBC11B10.09	1	0.904783	1.02506	0.920063	1.0441	1.1326	1	0.653946	0.876276	0.861919	1.0808	0.882725
SPBC11C11.02	1	1.07549	1.45238	0.990247	1.34615	1.58202	1	0.916671	0.940335	0.909924	1.12896	1.15271
SPBC11C11.06c	1	20.2348	28.1548	34.242	5.31802	3.64239	1	1.12392	1.46817	2.28293	2.31315	2.67116
SPBC11C11.07	1	0.809721	0.612954	0.385444	0.451109	0.445741	1	0.944449	0.904592	0.851735	0.876454	0.957835
SPBC11C11.08	1	0.905121	0.845042	0.873105	0.868843	0.747383	1	0.688018	0.812993	0.795605	0.817402	0.626016
SPBC11C11.10	1	0.931961	0.807932	0.493298	0.678007	1.14979	1	1.53936	1.38047	1.32571	1.18396	1.01895
SPBC11G11.02c	1	0.863928	1.12117	1.02158	1.15518	0.991929	1	1.10353	1.16251	0.939452	0.840668	0.977283
SPBC11G11.03	1	0.375343	0.249858	0.327849	0.472169	0.658976	1	1.24703	1.03836	0.994707	1.11404	0.926974
SPBC11G11.05	1	0.55901	0.505921	0.509144	0.627839	0.896063	1	1.13117	1.03755	1.00038	1.13334	0.995709
SPBC11G11.06c	1	0.99841	0.712441	0.930045	1.14848	0.658176	1	1.56811	1.12985	1.07654	1.27215	1.05374
SPBC11G11.07	1	0.688663	0.500137	0.806072	0.828506	0.803685	1	1.16102	1.03443	0.70213	0.798012	0.748442
SPBC1215.01	1	0.931328	0.904589	1.12592	1.41111	1.06887	1	0.955149	1.09972	1.05984	1.19623	1.2421
SPBC1215.02c	1	1.02337	1.21388	1.00038	1.04838	1.61992	1	0.973306	1.04337	1.07917	1.03111	0.915397
SPBC1271.02	1	1.11463	1.34764	1.13184	1.14506	1.5095	1	1.86789	1.66749	1.28911	1.74706	1.87199
SPBC1271.04c	1	1.19527	0.8471	0.769593	0.544287	0.656497	1	1.14162	1.13753	0.986801	0.85761	1.00613
SPBC1271.07c	1	1.16881	0.994777	0.654615	1.16173	0.823837	1	1.30789	1.18648	1.09268	1.10749	0.979842
SPBC1271.12	1	1.19434	0.929041	0.995684	0.989235	1.04136	1	1.13584	1.1328	1.12129	1.1196	0.978117
SPBC1271.14	1	1.25265	1.37548	1.03576	1.72771	1.89812	1	1.06789	1.01588	0.958688	1.06528	1.21647
SPBC1289.02c	1	1.1025	1.18308	1.55564	1.19101	1.03148	1	1.41269	2.03439	1.36825	1.80853	1.60355
SPBC1289.03c	1	0.819925	0.824843	0.470803	0.675097	0.777925	1	0.981879	1.02914	0.993188	1.20128	0.960331
SPBC1289.04c	1	0.750497	0.914225	1.25349	1.05564	1.05294	1	1.13776	1.0132	1.03399	0.777847	0.917814
SPBC1289.05c	1	1.33106	0.904137	0.695502	1.14567	0.750099	1	1.05158	0.952612	0.916811	0.847692	0.827092
SPBC1289.06c	1	1.89158	2.56975	3.41576	1.3816	1.02642	1	1.09885	1.00587	1.20895	1.40431	1.30918
SPBC1289.07c	1	0.63513	0.302327	0.363481	0.489213	0.654241	1	0.936308	0.821046	0.967501	0.866555	0.811915
SPBC1289.09	1	0.911716	1.12358	1.06532	1.12427	0.916404	1	0.844241	1.44531	1.09149	1.24942	0.944745
SPBC1289.11	1	1.01018	0.658232	0.625675	0.958253	0.897445	1	1.37104	1.45821	0.79429	0.966701	0.823507
SPBC1289.12	1	1.55946	1.28777	1.48147	1.26464	1.26592	1	0.775579	0.729106	0.496863	0.734262	0.877862
SPBC1289.16c	1	1.28219	2.42343	2.17834	1.65348	1.68654	1	0.827184	1.32508	1.79146	0.990573	2.52157
SPBC12C2.03c	1	1.71938	1.9943	1.29539	1.53583	1.16	1	1.0854	1.21432	1.02399	0.980035	0.966977
SPBC12C2.05c	1	0.987067	1.38905	1.38108	1.54254	1.29188	1	0.547816	1.02769	0.684984	0.548868	0.859182
SPBC12C2.06	1	0.935964	1.0348	1.36382	1.09318	0.993721	1	0.878569	0.815353	0.895073	0.787731	0.828287
SPBC12C2.07c	1	1.06532	1.24547	0.57446	0.736169	0.75473	1	1.00647	0.991655	1.00615	1.10962	0.909933
SPBC12C2.08	1	1.00895	1.37685	2.19799	1.47066	1.04445	1	0.759076	0.761964	0.853009	0.809618	0.972053
SPBC12D12.03	1	0.742191	0.804722	0.541561	0.895089	0.844244	1	1.0885	1.32597	0.948635	1.0033	1.02185
SPBC12D12.04c	1	1.13823	1.64007	1.75895	1.42886	1.31962	1	1.08904	0.915698	1.28723	0.958882	0.714953
SPBC12D12.07c	1	1.43249	0.737552	0.961675	0.614374	0.796873	1	0.844241	0.959912	1.11432	0.654459	0.775307
SPBC1347.02	1	0.220642	0.139504	0.135299	0.346425	0.766469	1	1.00621	0.987452	1.21815	0.991201	0.864263
SPBC1347.04	1	1.22614	1.52066	1.25456	1.05676	1.37091	1	1.06485	1.21075	1.30341	1.20108	1.23481
SPBC1347.06c	1	0.982145	1.33205	1.35324	1.21455	0.828042	1	0.827184	0.96237	1.34857	1.22866	1.36751
SPBC1347.09	1	0.853131	0.627046	0.939633	0.71872	0.851912	1	0.927051	0.669848	1.18126	1.1355	0.976738
SPBC13A2.02	1	1.07412	1.34943	0.964451	1.33466	1.28565	1	1.33602	1.1737	1.23595	0.899078	1.24636
SPBC13A2.04c	1	1.11636	0.751895	0.548395	0.513876	1.05257	1	1.00038	0.916149	0.776831	0.532023	0.44877
SPBC13E7.02	1	0.771946	0.87355	0.974975	0.572914	0.803731	1	0.795958	1.62104	1.70651	1.56623	1.42335
SPBC13E7.04	1	1.11115	1.25027	1.30672	0.922096	0.620637	1	0.794584	1.02182	1.09494	0.831151	0.909708
SPBC13E7.07	1	0.848092	0.976367	1.07547	0.870114	0.832872	1	0.614922	0.74842	0.768892	0.909012	1.14414
SPBC13E7.08c	1	0.913689	1.34345	1.14615	0.967404	0.839589	1	0.838308	0.704876	0.889437	0.976132	0.938106
SPBC13E7.09	1	1.08551	1.19474	1.08962	1.11514	0.889935	1	0.770066	0.842319	1.0946	1.15803	0.958072
SPBC13G1.01c	1	1.11528	1.59926	0.755672	0.947308	1.36526	1	1.10997	0.999108	1.13555	1.15272	0.949553
SPBC13G1.02	1	1.34399	1.6174	1.57681	1.69078	1.43237	1	1.03672	1.12127	1.08678	1.07482	1.14518
SPBC13G1.03c	1	1.13816	0.865398	1.08222	0.911099	0.994767	1	1.25878	1.15227	1.0206	0.981846	0.972053
SPBC13G1.08c	1	0.790006	0.72442	0.738016	1.06815	1.02972	1	1.30657	1.20806	0.711136	0.873604	0.749017
SPBC13G1.09	1	0.275203	0.363044	0.512474	0.800327	0.917578	1	1.0107	0.842467	1.04917	0.615512	0.930833
SPBC13G1.10c	1	1.09259	1.27718	1.11032	1.24195	1.35593	1	1.12001	1.26146	0.535866	0.586765	0.726504
SPBC13G1.11	1	1.48145	1.07224	1.1118	1.13936	0.911916	1	1.08642	1.00256	0.712844	0.700441	0.84576
SPBC146.07	1	0.933567	1.06548	0.956135	1.26257	1.36516	1	0.897746	0.859689	0.948713	0.752394	0.841443
SPBC146.12	1	0.942731	0.988585	1.41966	1.11989	0.876648	1	0.938727	0.892066	0.708445	0.883475	0.831971
SPBC146.13c	1	1.12247	1.31149	2.27969	1.02606	0.844396	1	1.01169	1.14399	1.0518	1.06691	1.04474
SPBC146.14c	1	0.84113	0.982107	1.18362	1.06481	0.858794	1	1.07244	0.975645	0.862007	1.04013	0.904635
SPBC14C8.04	1	0.9712	0.600382	0.526684	0.711124	0.564	1	1.11335	1.00442	1.00552	0.886145	0.843144
SPBC14C8.06	1	1.09077	1.1946	1.73877	1.5761	0.967411	1	1.4682	1.56154	1.57717	1.28746	1.48478
SPBC14C8.12	1	1.19959	0.362555	0.274285	0.63908	0.635269	1	0.994151	0.691216	1.15724	0.762544	0.735016
SPBC14C8.16c	1	0.978933	0.891541	1.08906	0.921104	0.783278	1	0.960402	1.11045	1.17662	0.884094	1.32409
SPBC14F5.03c	1	0.874536	0.660835	0.422991	0.853209	1.43462	1	1.16016	1.30363	1.03222	1.19015	1.00638
SPBC14F5.04c	1	1.4177	0.96801	1.14889	1.33813	1.13832	1	0.939909	0.864669	0.916401	1.00707	0.968871
SPBC14F5.05c	1	1.09731	0.612005	0.373327	0.452086	0.677261	1	0.962568	1.00822	0.962171	0.955342	0.933916
SPBC14F5.06	1	0.85245	0.660314	0.252762	0.538004	0.893502	1	1.07831	0.970272	1.06242	0.886239	0.915176
SPBC14F5.07	1	1.14744	0.956911	1.43702	1.04254	0.944364	1	1.20474	1.16411	0.981225	1.08603	0.859962
SPBC14F5.09c	1	0.869317	0.684391	0.556837	0.594851	0.624174	1	1.02577	1.06661	1.00704	0.977762	1.01394
SPBC14F5.11c	1	1.10983	1.94591	2.82486	1.49253	1.11473	1	1.15345	0.96986	1.2036	0.783117	1.10781
SPBC14F5.13c	1	1.29395	2.09871	3.03685	2.2471	1.23573	1	0.945419	0.688877	0.958536	1.1674	0.917814
SPBC1539.01c	1	1.12001	0.897135	1.14467	0.9237	0.844764	1	1.26354	1.31149	1.46272	0.762544	0.644651
SPBC1539.04	1	2.26013	3.23694	6.38017	2.70277	1.69935	1	1.14696	1.0219	1.38214	1.26274	1.31777
SPBC1539.05	1	1.29598	0.847473	1.14941	1.15468	1.04075	1	0.770066	0.667561	0.445417	0.534276	0.420486
SPBC1539.07c	1	1.94953	3.11582	4.04285	4.15645	2.16289	1	0.942663	1.21841	0.950296	1.49335	1.32695
SPBC1539.10	1	0.562929	0.311504	0.491006	0.727588	0.8603	1	1.07896	1.0582	1.07654	0.83743	0.846105
SPBC15C4.01c	1	0.790672	0.83723	0.537512	0.810999	0.974492	1	1.37173	0.867469	1.02998	1.10749	0.779602
SPBC15C4.04c	1	0.969013	1.1586	0.767657	1.25757	1.34495	1	1.09426	1.20468	1.05984	1.06994	0.809031
SPBC15C4.05	1	0.984197	1.0993	0.509915	0.883082	1.44897	1	1.21632	1.26739	0.704025	0.97321	1.26179
SPBC15D4.09c	1	1.17757	1.7954	1.26283	1.1225	1.52579	1	0.908843	0.984849	0.957578	0.979338	1.06253
SPBC15D4.14	1	1.38828	1.15711	1.51433	0.875628	0.972369	1	1.24921	0.612543	0.866728	1.04271	0.872642
SPBC15D4.15	1	1.21924	0.957478	0.930463	0.916933	0.755109	1	1.16163	1.13242	1.14294	1.19062	1.06269
SPBC1604.01	1	3.4014	3.39965	12.4371	3.1371	1.79732	1	0.973344	1.85026	2.30921	3.30445	3.39238
SPBC1604.05	1	1.40051	1.87478	1.53382	2.21703	2.03738	1	1.04325	1.1058	1.05422	1.14027	1.29173
SPBC1604.06c	1	0.563866	0.321615	0.446649	0.568701	0.735039	1	0.902531	0.753017	0.672755	0.519202	0.50174
SPBC1604.07	1	0.94466	1.31755	1.14698	1.2775	0.977181	1	1.11005	1.26201	1.00071	1.37518	1.1452
SPBC1604.08c	1	0.951182	1.22953	1.07394	1.0696	1.14351	1	1.0501	1.3407	0.925455	1.08973	0.85608
SPBC1604.11	1	1.44976	1.2515	1.74209	1.23884	1.07592	1	0.885447	0.733145	0.789962	1.05228	1.03509
SPBC1604.12	1	1.29755	1.15856	1.13683	1.00224	1.132	1	0.807168	0.803763	0.979827	1.03153	0.957634
SPBC1604.14c	1	0.739763	1.02949	1.33971	1.19561	0.98737	1	1.03168	0.983617	1.20493	1.33688	1.15093
SPBC1677.03c	1	0.747525	0.611922	0.531967	0.647161	0.607934	1	1.09151	1.03021	1.03203	0.761775	0.907551
SPBC1683.01	1	0.548539	0.350993	0.179286	0.89156	0.829322	1	0.910699	0.778523	0.458697	0.51287	0.990362
SPBC1683.10c	1	1.32284	0.417529	0.0927	0.72596	0.835927	1	1.76356	1.41048	0.968398	1.04076	0.809781
SPBC1685.09	1	1.15414	0.616679	0.318156	0.490857	0.480489	1	0.942245	0.963598	0.956439	0.818757	0.752197
SPBC1685.10	1	1.05765	0.821144	0.620604	0.677804	0.612103	1	0.841956	0.819681	0.931338	0.733952	0.814479
SPBC1685.13	1	3.08309	3.58489	3.6466	3.03189	1.81912	1	1.09086	0.808919	1.01539	1.13131	1.11657
SPBC1685.14c	1	1.71449	2.7652	4.67022	1.95413	1.28731	1	0.787455	0.949439	1.19244	1.32076	0.998202
SPBC16A3.01	1	1.31416	1.24537	1.86861	1.21107	0.872035	1	0.830248	0.875253	1.1412	1.02769	1.16254
SPBC16A3.02c	1	6.33794	15.0308	16.1253	4.41136	2.38774	1	1.34715	1.38799	2.23435	2.65216	2.03774
SPBC16A3.05c	1	0.784789	0.890364	0.836534	0.96109	0.930021	1	1.09973	0.939486	1.11297	1.24183	1.08679
SPBC16A3.08c	1	0.844853	0.727305	0.466148	0.497953	0.556045	1	0.826444	0.793214	0.845232	0.772925	0.844736
SPBC16A3.09c	1	1.80594	2.6352	3.0707	1.33625	1.22886	1	1.68042	1.07321	0.902813	1.74274	1.36751
SPBC16A3.10	1	0.937031	1.27553	1.98224	1.37638	1.07974	1	1.37173	1.44785	1.34857	0.660382	0.749017
SPBC16A3.14	1	0.840263	0.888003	1.03875	0.912729	0.874577	1	1.01725	1.33853	1.12601	1.23055	0.921122
SPBC16A3.18	1	1.63436	1.72192	2.96962	1.41716	0.921968	1	1.61547	1.54857	1.29288	1.71481	1.56381
SPBC16C6.02c	1	1.1707	1.37165	2.54659	1.1974	0.848232	1	1.08965	0.990025	0.987618	0.835133	0.999149
SPBC16C6.05	1	0.940358	0.885555	0.842391	0.833548	0.974132	1	1.9103	1.46629	2.02945	1.64268	1.71621
SPBC16C6.06	1	0.891298	1.0912	1.33876	1.37669	1.05538	1	0.994151	1.03682	1.03813	1.2132	0.966977
SPBC16C6.07c	1	1.20882	1.89411	1.57203	1.33654	1.63183	1	1.21307	1.38035	1.2869	1.3267	1.29097
SPBC16C6.08c	1	0.869418	1.34472	0.991785	0.971549	0.897866	1	0.739213	1.03322	1.14021	0.899544	1.09898
SPBC16C6.11	1	1.11911	0.583855	0.34245	0.507216	0.434737	1	1.08991	0.733145	1.0857	1.1674	0.789534
SPBC16C6.12c	1	0.462236	0.500051	0.59937	0.807418	1.24948	1	0.877361	0.457849	0.645922	0.599822	0.603877
SPBC16C6.13c	1	0.971226	1.12987	1.25192	1.35189	1.16707	1	0.964069	0.942514	0.885416	0.824317	0.890107
SPBC16D10.05	1	1.01893	0.516089	0.81346	0.634968	0.656936	1	1.75936	2.17015	1.33528	0.789308	1.00092
SPBC16D10.09	1	0.96778	1.29308	0.776411	0.986846	1.01462	1	1.00906	1.04871	1.12675	0.834275	0.986917
SPBC16D10.10	1	0.822011	0.782221	0.794397	0.763543	0.824532	1	1.22706	0.961161	1.17431	1.07827	1.10781
SPBC16D10.11c	1	1.37173	0.693726	0.550847	0.616117	0.577142	1	0.843877	0.760118	0.884787	0.965076	0.872931
SPBC16E9.02c	1	1.26656	1.78615	1.64708	1.48494	1.24326	1	0.61987	0.838517	0.929266	1.0024	0.89927
SPBC16E9.05	1	1.08908	1.30084	1.13812	1.06541	0.92396	1	1.65431	1.90958	1.6922	1.60982	1.8155
SPBC16E9.09c	1	0.91604	1.08723	0.663392	1.20793	1.09373	1	1.10537	0.733145	0.860592	1.16097	1.07516
SPBC16E9.10c	1	0.538718	0.588859	0.503668	0.827282	1.18195	1	0.752361	0.676288	1.10169	0.95075	0.80376
SPBC16E9.11c	1	1.49925	2.16817	3.09054	1.36501	1.2824	1	0.902531	1.06505	1.39216	1.07093	1.10059
SPBC16E9.13	1	1.28249	1.7324	1.58056	1.2998	1.04781	1	1.07896	1.07222	1.09025	1.0166	0.92581
SPBC16G5.04	1	0.985072	0.780822	0.728034	0.882503	0.788788	1	0.442148	1.05153	0.908438	0.748803	0.566204
SPBC16G5.05c	1	1.19592	1.59059	1.00759	1.17818	1.674	1	0.855112	0.797564	0.862196	0.655544	0.897634
SPBC16G5.08	1	1.28546	1.63775	1.15134	1.30063	1.20098	1	1.24377	1.60478	0.883972	1.18653	1.19285
SPBC16G5.09	1	0.959232	0.666553	0.997725	1.12772	1.1411	1	1.01428	0.992683	0.8103	0.860128	0.821773
SPBC16G5.10	1	1.00083	0.947641	1.61104	0.815575	0.696541	1	1.28792	1.25046	0.957578	0.944475	0.633035
SPBC16G5.11c	1	1.50092	1.36148	1.6296	0.912684	0.964758	1	1.40002	1.48902	1.1755	1.39357	1.44542
SPBC16G5.14c	1	0.845804	0.708835	0.485781	0.678099	0.656815	1	0.94162	1.00747	0.989201	0.796252	0.983053
SPBC16G5.15c	1	0.856284	0.978985	0.677788	1.09388	1.3019	1	0.916671	1.07785	1.23753	0.722619	0.968672
SPBC16G5.18	1	1.11815	1.18342	1.80515	1.27889	1.07681	1	1.71243	1.43987	1.44961	1.42977	1.73364
SPBC16H5.02	1	0.8322	0.819939	0.600834	0.69513	0.777168	1	0.976815	0.917903	0.898452	0.834224	0.86478
SPBC16H5.03c	1	0.961038	0.761396	1.26897	1.16619	0.922716	1	1.03545	0.781669	0.758971	1.03407	0.674933
SPBC16H5.04	1	1.30524	0.835158	0.936684	0.975581	0.579943	1	1.04119	1.12482	1.07909	0.95318	1.07442
SPBC16H5.05c	1	1.15934	1.22542	0.822545	1.19279	1.55753	1	0.616546	0.627828	0.749423	0.857862	0.529635
SPBC16H5.06	1	1.19919	1.76371	0.816181	0.969684	0.945063	1	0.982316	1.07596	1.14266	0.990573	0.99448
SPBC16H5.07c	1	1.23785	1.80659	1.92871	1.2722	1.25832	1	1.33867	1.2257	1.19801	1.31794	1.3331
SPBC16H5.08c	1	0.9024	0.733191	0.385193	0.730444	1.10556	1	1.01504	1.11813	0.95665	0.946169	1.04003
SPBC16H5.10c	1	0.729819	0.536387	0.780744	0.618767	0.977678	1	1.22183	1.12941	1.0313	1.00676	0.921977
SPBC16H5.11c	1	0.861112	0.901814	0.619912	0.928579	0.999503	1	1.15772	1.21246	1.10413	1.17567	0.956017
SPBC16H5.12c	1	1.0983	1.67489	1.57649	1.80382	1.45215	1	0.946445	0.852357	0.950905	0.997016	0.910304
SPBC1703.03c	1	0.714324	0.629713	0.593172	0.820434	1.12487	1	1.38084	1.08743	0.686079	1.33636	1.08025
SPBC1703.05	1	0.422506	0.511107	0.609258	0.733586	0.972926	1	1.26076	1.31624	1.27402	1.29038	0.866067
SPBC1703.07	1	0.838899	0.689077	0.635634	0.753088	0.677235	1	0.95397	1.08947	0.895995	0.921047	0.862408
SPBC1703.10	1	1.11687	1.27213	1.11464	1.19796	1.29041	1	1.17883	0.886555	0.933791	1.05521	1.05345
SPBC1703.13c	1	1.27342	1.79356	1.58984	0.967282	1.05545	1	0.827184	0.907838	0.839306	0.975449	0.940235
SPBC1703.14c	1	1.14536	1.35919	0.938649	1.04444	1.40819	1	1.12471	1.25913	1.0883	0.614758	0.782871
SPBC1709.02c	1	0.814699	0.566007	0.551224	0.601722	0.619254	1	0.994042	0.998597	0.967102	0.916493	0.857504
SPBC1709.05	1	0.956539	0.752777	0.411847	0.833406	0.834279	1	0.999811	0.935663	0.898285	0.873838	0.898589
SPBC1709.07	1	0.875558	0.93213	1.52935	1.28744	1.09133	1	1.08487	1.29003	1.00913	1.19623	1.49323
SPBC1709.08	1	0.820488	0.907445	0.988518	1.25254	1.01586	1	1.12782	1.26441	0.907143	0.86879	1.07276
SPBC1709.15c	1	0.955119	0.993271	0.911632	1.05844	1.32705	1	1.01819	1.04983	1.06518	0.787062	0.87196
SPBC1709.17	1	1.17725	1.40888	1.14435	1.39298	1.22102	1	0.951352	0.50928	0.534112	0.705978	0.844047
SPBC1709.18	1	1.20514	1.28577	1.23169	0.9228	0.968391	1	0.94471	1.03843	0.950614	0.818785	0.860515
SPBC1711.04	1	0.824755	0.370966	0.422926	0.80522	0.841276	1	0.671454	0.93123	0.989746	0.79142	0.737313
SPBC1711.05	1	0.587366	0.336052	0.313636	0.663646	0.719967	1	0.871928	0.927363	0.942084	0.990573	0.730289
SPBC1711.06	1	1.05926	0.869338	0.51571	0.686078	0.838561	1	1.14418	0.954862	0.785163	0.835123	0.747398
SPBC1711.07	1	0.305757	0.265367	0.243091	0.55685	1.00904	1	1.13118	1.40156	1.03072	1.04843	1.12871
SPBC1711.08	1	1.47302	2.01541	2.43025	1.97157	1.57432	1	1.13015	1.14953	1.1421	1.18293	1.19965
SPBC1711.10c	1	1.59138	2.53	3.04285	1.88044	1.84218	1	1.00068	0.797164	0.960326	0.85504	1.13566
SPBC1711.12	1	2.57948	2.20308	4.42058	3.01456	1.67064	1	1.58544	1.0039	1.10715	1.31818	0.858107
SPBC1711.13	1	0.967928	0.626118	0.461308	0.653116	0.541376	1	1.16579	1.15851	0.964829	0.988005	1.1378
SPBC1711.16	1	0.407419	0.407817	0.322642	0.660896	1.18101	1	1.04085	0.897916	1.15823	1.08059	0.970837
SPBC1718.03	1	1.07436	0.584353	0.713671	0.777846	0.725273	1	0.900524	0.887883	0.979204	0.894162	0.644651
SPBC1734.01c	1	0.387555	0.338912	0.523104	0.511201	0.774386	1	0.647642	0.777238	0.863246	0.611022	0.68409
SPBC1734.03	1	1.15281	1.14537	1.08697	1.32411	1.21824	1	1.13267	0.999108	1.00432	1.31152	1.23807
SPBC1734.04	1	1.32313	0.838764	1.39346	1.0014	1.13439	1	1.1018	1.29726	0.923351	1.11413	1.38939
SPBC1734.08	1	1.33033	2.00087	3.11456	1.99899	1.27888	1	0.722965	0.733145	1.09365	1.1177	1.20603
SPBC1734.11	1	1.55848	1.68623	1.27303	1.61907	2.69781	1	0.943669	1.12187	1.13926	1.20285	1.04462
SPBC1734.13	1	1.13013	1.13613	1.46142	0.9955	0.829501	1	1.32688	1.25866	1.20214	1.27132	1.14079
SPBC1734.14c	1	1.34756	0.697555	0.709913	1.00077	1.14825	1	1.03398	0.96523	1.04928	1.40088	1.08111
SPBC1734.15	1	0.941707	1.35283	0.985164	0.914847	1.05208	1	1.0854	0.625228	0.671491	1.13015	0.771381
SPBC1734.16c	1	1.08971	1.41415	1.87986	0.953149	0.828455	1	1.0078	1.04328	0.967501	1.31041	1.08919
SPBC1773.01	1	1.12642	1.95503	1.87926	1.77579	1.69958	1	0.903685	1.20485	1.23781	1.10891	1.28269
SPBC1773.02c	1	1.31933	1.16528	1.85803	2.37887	0.899527	1	1.06789	0.889715	1.28202	1.31889	1.00997
SPBC1773.04	1	1.89716	0.980118	1.31575	0.982891	0.997617	1	1.05171	0.936162	1.15053	1.08971	1.22084
SPBC1773.07c	1	1.21263	1.11014	0.835979	0.939412	1.19679	1	1.13144	1.14343	1.36962	1.37447	1.2881
SPBC1773.10c	1	0.895291	0.849188	0.932063	0.828006	0.709262	1	0.980216	1.00087	1.18078	1.0861	0.996843
SPBC1773.14	1	1.14565	0.727688	1.00986	1.56862	0.834118	1	0.800917	0.819681	0.950068	1.011	0.764463
SPBC1778.03c	1	1.41651	1.49519	1.74473	1.28854	0.994465	1	0.807249	0.876276	0.886545	0.966701	1.07002
SPBC1778.06c	1	1.03643	1.68808	1.62914	1.71459	1.22663	1	1.22891	1.26025	1.06202	1.24128	1.35275
SPBC1778.08c	1	1.11059	1.26969	1.55504	1.57569	1.11523	1	1.51022	2.0078	1.22653	1.46508	1.45047
SPBC1778.10c	1	1.98685	3.5492	3.09413	1.11805	0.93438	1	0.966942	1.38672	1.6139	1.81414	1.37387
SPBC17A3.04c	1	0.836954	0.614581	0.811052	0.666389	0.578431	1	1.25964	1.14494	1.07632	1.10104	1.07232
SPBC17A3.05c	1	1.04784	0.969388	1.86865	1.34333	1.0689	1	1.06789	0.834021	0.884934	1.10387	1.2702
SPBC17A3.07	1	1.33282	1.65216	2.24724	2.13057	1.5886	1	1.07938	0.879986	1.08029	1.23125	1.15891
SPBC17A3.08	1	0.816802	0.801918	0.940942	0.973164	0.954774	1	1.22118	0.85305	0.769737	0.789118	0.804574
SPBC17D1.02	1	0.513966	0.348601	0.346652	0.693436	0.982374	1	0.775579	0.760821	0.577133	0.711472	0.803509
SPBC17D1.03c	1	0.696962	0.478573	0.514661	0.99535	0.834047	1	0.718478	0.845937	0.803534	0.780797	0.613377
SPBC17D1.06	1	0.203525	0.138271	0.253485	0.407737	0.601496	1	1.08399	0.859722	0.828935	0.762782	0.906882
SPBC17D1.07c	1	1.12193	0.667355	0.577391	0.779481	1.04855	1	1.66962	1.24611	1.0343	1.23055	0.911675
SPBC17D11.04c	1	1.09313	1.23299	1.72487	1.51964	1.26039	1	1.57189	1.41657	1.7461	1.64268	0.882725
SPBC17D11.05	1	0.878605	0.827637	0.52383	0.596302	1.03753	1	0.999269	1.02678	1.05597	0.948099	0.959288
SPBC17D11.07c	1	1.01062	1.56742	1.58223	1.5519	1.25829	1	1.08852	1.15166	1.18537	1.05998	1.27721
SPBC17D11.08	1	1.76824	2.54688	4.57273	1.90006	1.03687	1	0.911118	1.37159	1.68279	1.93695	1.98829
SPBC17F3.01c	1	0.629366	0.57637	0.737593	0.859736	0.748849	1	0.736914	0.649864	0.83693	0.966701	0.667278
SPBC17G9.02c	1	1.05778	0.988105	0.930143	0.965522	0.798085	1	0.922762	1.07178	0.9404	1.00462	0.920746
SPBC17G9.03c	1	1.00821	0.817891	0.480358	0.624546	0.817744	1	1.07775	1.0449	0.932397	1.02634	0.881828
SPBC17G9.04c	1	1.10672	0.982673	1.15167	1.10091	1.19276	1	1.18233	0.752595	0.777116	0.741301	0.951253
SPBC17G9.06c	1	1.01905	0.982372	1.37448	0.920616	0.770602	1	1.37864	1.43715	1.24228	1.20694	1.17605
SPBC17G9.07	1	1.42506	0.672463	0.559288	0.558568	0.500879	1	1.10845	0.973499	1.1806	0.92091	1.01991
SPBC17G9.08c	1	0.872995	1.32967	1.1557	0.920284	0.925803	1	1.0211	1.11423	0.960932	0.911039	0.835115
SPBC17G9.09	1	1.22861	0.73256	0.715187	0.572229	0.673826	1	0.938684	1.11539	1.00943	0.992184	0.961928
SPBC17G9.10	1	0.922412	0.553892	0.453117	0.447983	0.450227	1	0.986068	1.24311	1.12097	1.16958	1.26083
SPBC17G9.11c	1	1.1391	0.733424	0.633879	0.864563	0.710765	1	1.07476	0.958242	0.970816	0.927296	0.934282
SPBC17G9.12c	1	0.968667	0.551125	0.576158	0.725492	0.74391	1	0.810301	0.765745	0.747799	0.862183	0.743321
SPBC1815.01	1	0.991772	0.94998	0.55489	1.02308	0.964808	1	1.04163	0.997685	0.958377	1.01692	0.98823
SPBC1861.08c	1	1.39254	0.931937	1.13198	0.996919	0.893812	1	1.43272	1.20096	0.927995	0.959829	1.13388
SPBC18E5.06	1	1.14592	0.771779	0.641619	0.506801	0.440527	1	1.04442	0.966359	1.03991	1.04959	0.958956
SPBC18E5.07	1	1.2025	0.977969	0.612745	1.13692	0.861184	1	0.736306	0.896762	1.16697	0.969091	1.01914
SPBC18E5.11c	1	0.901403	1.35353	1.95531	1.05043	1.01574	1	1.38723	1.3217	1.935	1.42977	1.45047
SPBC18E5.12c	1	0.862622	1.07787	1.34833	1.13209	0.876447	1	1.41624	1.65663	1.29014	1.10096	1.33803
SPBC18H10.02	1	0.989577	1.12478	1.02478	0.9391	1.01266	1	1.06483	1.45767	1.14411	1.12812	1.29245
SPBC18H10.03	1	1.05589	0.707974	0.567002	0.675591	0.735498	1	0.873512	0.852697	0.861135	0.901521	0.808593
SPBC18H10.04c	1	0.921159	0.659138	0.45736	0.678081	0.896165	1	0.808695	0.919934	0.757144	0.682122	0.766087
SPBC18H10.12c	1	1.01054	0.765477	0.857866	0.79931	0.664089	1	0.985479	0.99588	0.976155	1.00307	0.959066
SPBC18H10.13	1	1.44296	0.630713	0.489027	0.503942	0.431253	1	0.93307	0.868468	0.908547	0.806623	0.864891
SPBC18H10.14	1	1.23181	0.714832	0.53149	0.65524	0.538508	1	0.854563	0.731155	0.851453	0.675729	0.761625
SPBC1921.03c	1	0.687116	0.93393	0.767669	1.05145	1.23281	1	1.54675	1.25645	1.42122	1.09582	0.85577
SPBC1921.05	1	1.31063	1.78103	2.34591	1.76607	1.34335	1	1.13393	1.16884	1.26893	1.18739	1.17026
SPBC19C2.07	1	1.00159	0.870346	0.962066	1.07428	0.794594	1	1.00995	0.98907	1.017	0.960212	0.942126
SPBC19C2.13c	1	0.450276	0.696769	0.703708	1.03774	1.86561	1	1.47383	0.715476	0.713737	0.837187	0.667278
SPBC19C2.14	1	0.954038	0.74299	0.717926	0.843215	0.745882	1	1.01309	1.08743	1.11102	1.22866	0.83096
SPBC19C7.10	1	2.06358	3.23503	2.69493	1.89316	1.44171	1	0.974065	1.15332	0.981225	1.18133	1.1668
SPBC19F5.03	1	1.18647	1.66567	1.55242	1.70574	1.57197	1	0.900735	0.844001	0.882478	0.836269	0.890578
SPBC19F5.04	1	0.915056	1.20652	0.824917	0.936123	0.714018	1	1.43898	1.24426	1.36911	1.35073	1.24862
SPBC19F5.05c	1	0.42238	0.337681	0.347896	0.543911	0.860638	1	0.810301	0.858922	0.984556	0.857097	0.865244
SPBC19F8.03c	1	1.04762	1.08264	1.41601	0.983642	0.84279	1	0.914486	1.2022	1.11451	0.8088	0.888591
SPBC19G7.05c	1	0.639202	0.887142	0.675299	0.826857	1.0296	1	0.929697	1.1183	1.03673	0.916404	0.649557
SPBC19G7.10c	1	0.914031	1.01915	0.916886	1.17111	1.06955	1	0.988674	1.11852	1.03875	1.20043	1.24705
SPBC19G7.15	1	0.891215	0.809565	1.12584	0.848029	0.899473	1	0.865604	0.844908	0.836383	0.959119	0.897226
SPBC19G7.16	1	1.35495	1.09578	1.0318	0.848814	0.798895	1	0.889439	0.932756	0.887519	1.09885	1.00874
SPBC19G7.17	1	0.94393	0.916918	0.784224	0.900001	0.999041	1	1.09885	1.54284	0.868988	0.861459	1.21863
SPBC1A4.02c	1	1.02573	0.928242	0.535459	0.843636	0.773754	1	1.03101	1.05762	0.884951	0.834058	0.95696
SPBC1A4.05	1	0.695693	0.823263	0.599182	1.02724	1.25348	1	0.955149	1.13578	1.0343	1.05897	0.839816
SPBC1A4.07c	1	0.394628	0.574244	0.537902	0.762165	1.06907	1	1.11149	0.772803	1.0706	0.911414	1.29218
SPBC1A4.08c	1	1.08253	1.09882	0.721206	0.958834	1.03176	1	1.08691	1.03601	0.979094	0.93671	0.932362
SPBC1A4.09	1	0.572486	0.524509	0.637032	0.883341	0.928944	1	0.888903	0.796611	0.573728	0.625601	0.700119
SPBC1D7.04	1	1.7443	1.08213	0.598928	0.685476	0.510832	1	0.967857	0.765745	0.937416	0.898005	0.799168
SPBC1E8.02	1	0.991214	1.32722	1.03859	1.29928	1.59298	1	0.988674	0.769642	0.835843	1.09614	1.24326
SPBC20F10.05	1	0.9008	1.10639	1.24242	1.05963	0.921079	1	0.584907	0.96523	0.767059	1.10749	0.61157
SPBC211.02c	1	0.923384	1.27447	1.06204	1.10539	1.02711	1	1.07633	1.51775	1.18956	1.23406	1.11657
SPBC211.03c	1	0.808026	0.801389	1.12003	0.858757	0.952452	1	0.836531	0.903727	0.770673	0.801546	0.661184
SPBC211.04c	1	0.804333	0.778703	0.712103	1.32296	1.48987	1	0.993416	1.1725	1.09313	0.633234	0.938669
SPBC215.02	1	1.25295	0.928261	0.776441	1.00569	1.00974	1	1.6997	1.43167	0.955448	1.47666	1.11097
SPBC215.06c	1	0.490943	0.240718	0.446898	0.597387	0.809539	1	1.00682	0.977527	0.844504	0.85255	0.730289
SPBC215.07c	1	1.28668	2.57917	2.33351	1.48698	1.80477	1	0.990489	0.795207	1.20306	1.08556	1.11657
SPBC215.08c	1	1.09996	0.909273	0.44311	0.937256	0.741439	1	0.933815	0.938545	0.88981	0.888385	0.844967
SPBC215.09c	1	1.19143	1.34877	0.893338	1.24602	1.59042	1	1.16131	0.997877	1.05457	0.758188	1.07012
SPBC215.10	1	1.17122	2.24218	2.49394	1.54653	1.14749	1	0.675393	0.780492	1.13302	0.731587	0.771381
SPBC215.11c	1	4.58597	15.5444	36.3409	18.9997	6.939	1	0.891284	1.63173	2.40749	4.52077	5.13258
SPBC215.12	1	1.025	0.901893	1.43168	0.996585	0.872638	1	0.92482	0.867469	0.895732	1.01244	1.07569
SPBC215.15	1	1.01687	1.20878	1.58	1.26899	0.973615	1	1.13793	1.34246	1.39875	1.3498	1.4254
SPBC216.03	1	1.89208	4.13331	7.38953	3.01498	1.68694	1	1.74045	1.00807	1.52975	1.87444	1.72957
SPBC216.05	1	1.06386	1.76247	1.82078	1.15382	1.52678	1	0.736914	0.452507	0.605626	0.648483	0.844047
SPBC216.07c	1	1.12484	1.03499	1.83478	0.93009	0.73525	1	1.13664	0.882823	0.82198	0.885024	1.12024
SPBC21B10.03c	1	1.27638	1.65529	1.48748	1.31859	1.77483	1	0.874792	0.803933	1.21884	0.833791	0.847816
SPBC21B10.08c	1	1.71981	1.83246	2.05348	3.55083	1.71923	1	1.05368	1.04097	1.16414	1.37582	1.66633
SPBC21C3.05	1	1.0751	0.75724	0.831509	1.04685	1.15503	1	0.795958	0.705469	0.873335	0.696104	0.882725
SPBC21C3.08c	1	1.10547	0.892495	0.514712	0.998951	1.27731	1	1.01974	0.940784	0.944478	0.840387	0.987362
SPBC21C3.09c	1	1.16503	0.710889	0.93028	0.702333	1.42259	1	1.39112	0.988572	1.0343	0.812874	0.911675
SPBC21C3.11	1	2.24807	2.04335	2.46817	1.43611	1.21616	1	0.868717	0.897916	1.25271	1.25988	0.786625
SPBC21C3.12c	1	1.54615	1.08804	0.885218	1.11586	0.788282	1	1.28344	1.34196	1.43432	1.3005	1.58664
SPBC21C3.13	1	1.11613	0.709824	0.573682	0.528731	0.53093	1	1.16834	0.931744	1.01452	0.960087	0.851131
SPBC21C3.14c	1	1.11842	1.62313	1.62725	1.10448	1.38388	1	0.919541	0.928171	0.935924	0.988846	0.945513
SPBC21C3.15c	1	0.994532	1.23807	0.906801	1.06046	1.05666	1	1.31961	1.34879	0.882948	0.948925	1.36751
SPBC21D10.09c	1	1.23511	1.61239	1.57729	1.39244	1.23094	1	1.07179	1.06006	0.855544	1.07128	0.618129
SPBC21D10.10	1	0.929385	0.823054	0.97942	1.25031	1.11174	1	0.795958	0.705469	0.789962	1.02955	0.558285
SPBC21D10.11c	1	0.97512	1.32108	1.46052	1.53793	0.92512	1	1.07951	1.03585	1.07335	1.32941	1.16977
SPBC21D10.12	1	0.804515	1.23178	1.06487	1.54458	1.28308	1	0.800824	0.838202	0.909707	1.02343	0.828306
SPBC21H7.05	1	1.40697	2.15114	1.45448	1.27152	1.47131	1	0.871928	0.927363	0.925108	0.660382	0.789534
SPBC21H7.07c	1	0.867686	0.518566	0.345511	0.592847	0.769013	1	1.13505	1.32032	1.09319	0.901818	1.18962
SPBC23E6.02	1	1.28979	1.13485	1.93993	1.29218	0.973105	1	1.16981	0.733145	1.3083	1.2132	0.749017
SPBC23E6.04c	1	0.749095	0.660098	0.598812	0.724603	1.12177	1	1.37384	1.29776	0.833881	0.927413	0.933493
SPBC23E6.05	1	0.639455	0.423168	0.311129	0.633985	0.92371	1	1.17906	1.10957	1.17568	0.976719	0.953452
SPBC23E6.06c	1	1.19145	1.06813	1.8242	1.48415	0.883846	1	1.18962	1.04205	1.05243	1.1403	1.04219
SPBC23E6.07c	1	1.25807	0.797034	0.93593	0.738796	0.835526	1	1.40749	1.3755	1.00432	0.729843	0.61157
SPBC23E6.09	1	0.877081	0.543825	0.367838	0.744008	0.563963	1	0.731985	0.690598	0.856484	0.891254	0.844047
SPBC23E6.10c	1	0.924144	0.84878	0.87674	0.746162	0.773132	1	1.08904	1.2572	1.02193	1.11565	0.854307
SPBC23G7.05	1	1.3173	1.00478	1.36498	1.11915	0.81101	1	0.859454	0.897916	1.20175	1.09059	1.17167
SPBC23G7.06c	1	1.69128	3.53634	3.26749	2.37855	1.72321	1	1.31311	0.879774	1.20974	0.97056	1.46266
SPBC23G7.07c	1	0.523995	0.434367	0.609321	0.543939	0.795135	1	1.17826	1.34144	0.994176	1.17751	1.13164
SPBC23G7.08c	1	0.967173	1.42575	0.854743	1.05775	1.40885	1	0.938503	0.930186	1.03745	0.855145	1.06607
SPBC23G7.10c	1	7.02245	9.06214	23.6877	7.38932	3.28257	1	1.80506	2.48879	8.80243	13.5079	12.3347
SPBC23G7.12c	1	1.49292	2.60315	1.80035	1.72233	1.59503	1	1.05336	1.11161	1.07488	1.17817	1.06483
SPBC23G7.15c	1	1.00255	0.76546	0.686206	0.600119	0.615723	1	0.743925	0.634922	0.715047	0.639412	0.732308
SPBC244.02c	1	0.50563	0.582572	0.470633	0.640115	1.06285	1	1.26287	1.37527	1.34229	1.4458	1.06391
SPBC24C6.03	1	1.07319	1.00181	1.07319	0.876623	1.03507	1	1.14162	0.687407	1.06234	0.804344	0.74489
SPBC24C6.04	1	1.03831	0.857649	0.810563	0.968263	0.956794	1	1.01446	0.892668	0.904838	1.06919	0.941428
SPBC24C6.05	1	0.90722	1.05465	0.967433	0.998178	0.995217	1	1.10244	1.08507	1.02547	0.955123	1.42074
SPBC24C6.11	1	1.45541	0.709332	0.956125	0.863864	1.08882	1	0.978899	1.10985	1.00146	1.12782	1.0871
SPBC25B2.05	1	0.394293	0.335319	0.409188	0.532477	0.66374	1	1.32849	0.992683	1.0343	0.963338	0.63887
SPBC25B2.06c	1	0.820597	0.532614	0.574571	0.755721	0.789756	1	1.06789	1.57129	1.68669	0.536229	1.0823
SPBC25B2.07c	1	0.82735	0.721955	0.675394	1.16863	1.21946	1	0.779876	0.80312	0.755348	1.40088	0.966977
SPBC25B2.09c	1	1.08644	0.527039	0.302967	0.48802	0.590066	1	0.88427	0.917672	0.931658	0.796264	0.797459
SPBC25B2.10	1	1.21755	2.11077	2.0705	1.59829	1.02604	1	1.46227	1.37159	1.7152	1.89141	1.1843
SPBC25D12.03c	1	0.882365	0.774995	0.891273	1.08292	1.21098	1	1.1354	0.977768	0.697327	0.682208	1.0317
SPBC25D12.04	1	1.12127	1.47658	1.89801	2.59094	1.68156	1	1.151	1.33062	1.26509	1.49267	1.34488
SPBC25D12.05	1	0.931182	0.943482	0.513371	0.848789	1.11318	1	1.46994	1.99011	1.29315	1.23081	1.30301
SPBC25H2.02	1	0.899317	0.956431	0.657809	0.833165	0.989205	1	1.02311	0.90459	0.893892	0.978249	0.857818
SPBC25H2.03	1	1.88339	1.42337	2.45539	1.13842	1.27445	1	2.00312	1.83964	1.19431	1.8252	1.0609
SPBC25H2.05	1	0.848664	0.725538	0.608964	0.558307	0.499119	1	0.860925	0.961812	0.985472	0.832817	0.88261
SPBC25H2.07	1	1.29417	0.638288	0.503907	0.657412	0.679526	1	1.06789	1.08631	1.35576	1.11752	0.8927
SPBC25H2.09	1	2.01098	1.44036	1.24542	0.961669	0.785773	1	1.19394	0.914392	0.895732	1.27882	1.04445
SPBC25H2.11c	1	1.19732	1.41651	1.20895	1.28049	1.09333	1	0.713514	1.01814	0.674283	1.02534	0.721771
SPBC25H2.12c	1	0.919863	0.765407	0.834284	1.06561	0.8892	1	1.18005	1.11888	0.949694	0.971856	0.99537
SPBC25H2.13c	1	0.837859	0.794406	1.31245	1.17461	0.991136	1	2.30543	1.59785	1.38214	1.38832	1.41551
SPBC25H2.16c	1	1.05572	1.2625	0.835772	1.45937	1.79964	1	0.952862	0.898822	0.886686	0.9406	0.929708
SPBC26H8.02c	1	1.09362	0.962228	1.58832	1.33227	0.658407	1	0.486789	0.91524	0.67711	1.82024	1.04542
SPBC26H8.03	1	0.830077	1.24769	1.01457	0.894853	1.04222	1	0.898763	0.963793	0.691072	0.808599	0.837427
SPBC26H8.06	1	1.47669	1.05202	1.76096	1.53571	0.80803	1	0.977627	1.15443	0.849488	0.912715	0.8884
SPBC26H8.07c	1	0.846476	0.836431	0.541055	0.852299	1.00137	1	1.1816	1.09125	1.10336	1.05095	1.01897
SPBC26H8.08c	1	0.284095	0.267789	0.272894	0.500702	0.95747	1	1.06242	0.92831	0.914296	0.675307	0.726754
SPBC26H8.09c	1	0.966125	0.869468	1.00833	0.875851	1.25112	1	0.828459	0.788738	0.967501	0.891618	0.930474
SPBC26H8.10	1	0.951781	0.78839	0.664128	1.08411	1.36786	1	1.00949	0.778314	0.880882	0.859121	0.751187
SPBC26H8.11c	1	1.51795	0.823807	0.476387	0.788516	0.41259	1	0.840211	1.2142	1.10572	0.917093	1.41236
SPBC27.08c	1	1.11619	0.987132	0.379472	0.996005	2.12775	1	1.05136	1.00449	0.98644	0.948676	0.943473
SPBC27B12.03c	1	1.16341	2.30271	2.83601	2.87052	1.7179	1	0.668738	0.621642	0.668947	0.716285	0.654063
SPBC27B12.08	1	1.10516	0.778381	1.12839	1.27863	0.945316	1	0.796504	1.06631	0.813183	0.676956	0.941402
SPBC27B12.11c	1	1.02332	1.63972	1.59175	1.3382	1.60889	1	0.584907	0.695522	1.0343	0.887149	0.616329
SPBC27B12.13	1	1.055	1.06833	0.881707	1.1105	0.972889	1	1.13355	1.13792	1.12161	1.1437	1.02553
SPBC28E12.03	1	0.783643	1.03229	0.872777	0.982945	1.38509	1	1.35079	1.10841	1.26676	1.05897	0.895247
SPBC28E12.05	1	0.727862	0.590174	0.48726	0.698364	1.12735	1	0.86096	0.831308	0.996679	0.972724	0.721771
SPBC28E12.06c	1	1.21462	1.02872	1.34745	0.914082	0.949893	1	0.80836	0.601571	0.64233	0.77116	0.588386
SPBC28F2.02	1	0.962081	0.939455	0.575724	0.919833	1.19433	1	1.49838	0.950422	1.08855	1.13033	1.06903
SPBC28F2.09	1	0.996962	1.03892	1.42498	1.05644	0.770347	1	0.477575	1.33182	1.55145	1.40088	1.29734
SPBC28F2.11	1	1.06026	1.20205	0.66996	0.798718	1.08792	1	1.13864	1.02161	1.08511	0.984383	0.928402
SPBC29A10.06c	1	0.935289	1.23603	1.28995	1.08062	1.09538	1	0.629807	0.59861	0.580701	0.750271	0.754425
SPBC29A10.07	1	1.04949	0.715154	1.42119	0.924529	0.971955	1	1.13397	0.762731	0.883164	0.809816	0.944533
SPBC29A10.08	1	1.88661	1.96946	2.48927	1.65671	1.29545	1	1.47221	1.32437	1.16246	1.71489	1.73735
SPBC29A10.10c	1	1.16685	1.17548	0.803847	1.01838	1.5768	1	0.881781	1.07727	0.986169	1.09059	0.798455
SPBC29A10.12	1	1.7999	2.22066	3.69688	2.47957	1.56084	1	0.946583	0.999108	1.29657	1.19904	1.00348
SPBC29A10.13	1	1.21011	1.20769	1.35215	0.974212	0.782407	1	1.11439	0.985623	0.988099	1.01059	0.907946
SPBC29A10.16c	1	1.13688	1.02585	1.20638	0.868013	0.781648	1	0.979621	1.05971	1.18595	1.36445	0.969133
SPBC29A3.02c	1	1.18883	1.06712	1.168	0.964214	0.744671	1	0.86053	0.808318	0.828029	0.602648	0.70904
SPBC29A3.04	1	0.951719	0.861987	0.935927	0.958789	0.737313	1	1.04189	1.01885	0.986103	0.932436	1.02077
SPBC29A3.06	1	0.440626	0.393161	0.371388	0.745696	1.33847	1	1.3482	1.11159	0.8637	1.00751	0.775801
SPBC29A3.07c	1	1.03759	0.635172	0.547152	0.931194	1.01242	1	0.956392	1.0582	0.597155	1.092	0.904524
SPBC29A3.09c	1	1.24294	0.636199	1.12096	0.841796	0.868367	1	1.03025	1.02287	0.917034	0.959859	0.944745
SPBC29A3.10c	1	1.37603	0.912413	0.991906	1.18943	0.744786	1	1.25221	1.3217	1.44355	1.49955	1.10781
SPBC29A3.16	1	0.615884	0.269922	0.297076	0.724429	0.757877	1	1.05943	0.877198	1.0343	0.916087	0.992098
SPBC29A3.18	1	1.04305	1.41567	0.594529	0.777926	0.954499	1	0.908988	1.06159	0.997268	0.96484	0.703021
SPBC29B5.01	1	3.29257	5.55525	4.07051	1.68927	1.79143	1	0.700382	1.4239	1.81762	1.57771	1.11246
SPBC29B5.03c	1	1.46207	0.61552	0.465524	0.689952	0.622448	1	0.992563	1.02767	1.02558	0.980356	0.953168
SPBC29B5.04c	1	0.867504	0.917262	1.16083	1.35163	1.1329	1	0.738409	0.962907	1.04075	0.934833	0.974502
SPBC2A9.02	1	5.12563	8.44221	14.3549	11.7277	2.82736	1	0.835582	1.47375	3.13441	7.11785	5.51867
SPBC2A9.09	1	0.997818	1.34899	1.10401	1.0952	1.1129	1	1.07004	0.79216	0.774268	1.16061	0.973186
SPBC2D10.04	1	1.50784	1.9778	2.95555	1.74844	1.1815	1	1.23309	0.977527	1.82434	1.49027	1.75232
SPBC2D10.05	1	2.89061	5.66047	8.07678	2.59081	1.39345	1	0.676899	0.897916	1.17279	1.25578	1.61393
SPBC2D10.09	1	1.01294	1.06788	0.940141	1.18346	1.05246	1	1.15345	1.07083	1.38552	1.51613	1.32114
SPBC2D10.10c	1	1.08685	0.460248	0.404471	0.611796	0.735463	1	1.01665	1.11883	1.05306	1.10752	1.01376
SPBC2D10.11c	1	0.932788	1.3815	1.15205	1.28493	1.10498	1	0.919606	0.842933	0.861149	0.830865	0.892003
SPBC2D10.12	1	0.762726	0.869633	0.718839	0.727867	0.822697	1	1.07959	0.779543	0.970505	0.677888	0.845005
SPBC2D10.14c	1	0.861916	0.996763	1.09426	1.64569	1.47516	1	0.78457	0.590046	0.961198	0.783117	0.921977
SPBC2D10.18	1	1.39734	1.10559	1.25205	1.01575	0.890451	1	0.871928	0.783765	1.15087	1.32076	1.00757
SPBC2F12.02c	1	1.62833	1.20247	1.51725	0.922343	0.995818	1	1.42703	1.06122	1.31607	1.46342	1.15093
SPBC2F12.04	1	1.00442	0.722997	0.464817	0.481205	0.455773	1	0.90399	0.893307	0.980275	0.661964	0.847825
SPBC2F12.05c	1	1.70302	4.07533	5.79812	1.97023	1.56873	1	1.01376	1.05486	1.08374	1.34389	1.33169
SPBC2F12.10	1	1.17589	1.74809	1.19276	1.23542	1.276	1	1.12405	0.963541	1.01652	0.845863	0.771381
SPBC2F12.14c	1	0.70416	0.453732	0.238302	0.606936	0.92389	1	1.03895	1.17337	0.851306	0.885631	0.84133
SPBC2G2.02	1	0.975707	1.01036	0.977208	1.07631	1.21582	1	1.18098	0.924725	1.07465	0.953044	0.84689
SPBC2G2.04c	1	1.16913	0.861115	0.772825	1.07685	0.796925	1	0.900593	0.840569	1.05637	1.14006	1.11687
SPBC2G2.08	1	0.592703	0.482093	0.396016	0.567134	0.945442	1	1.01296	1.11064	0.992341	0.941423	0.91241
SPBC2G2.11	1	0.743681	1.26013	0.964845	1.25131	1.07363	1	0.996287	0.987206	0.825398	0.828513	0.816348
SPBC2G2.12	1	0.912249	0.779505	0.831494	0.785444	0.752399	1	1.21086	1.219	1.01799	0.984106	1.02091
SPBC2G2.13c	1	1.1206	1.22043	1.0467	1.22903	1.19758	1	1.69735	1.04888	0.949141	0.691509	0.935359
SPBC2G2.16	1	1.19192	1.40584	0.990672	1.26388	1.44165	1	1.14311	1.14299	0.900695	0.805987	0.96294
SPBC2G5.01	1	1.07776	1.31286	0.792921	0.957514	1.16152	1	1.11083	1.11637	0.844755	1.05466	1.01357
SPBC2G5.05	1	1.15895	1.265	0.797789	1.0977	1.25759	1	0.987444	1.11909	1.14696	1.09742	1.15161
SPBC2G5.06c	1	1.30312	1.89242	1.28941	1.03293	1.29827	1	1.01497	0.872927	0.944799	1.01462	0.923968
SPBC30B4.02c	1	1.33035	1.21669	1.20095	0.930237	1.0047	1	1.06789	0.988572	1.16685	0.883475	0.798455
SPBC30D10.02	1	1.12675	0.906554	1.26922	0.907933	0.705045	1	0.601688	0.905014	1.48576	0.85255	1.01928
SPBC30D10.03c	1	0.893387	1.15197	1.22467	1.50685	1.1729	1	1.49674	1.07194	0.877635	1.25299	1.5612
SPBC30D10.05c	1	1.40746	1.06369	1.06805	0.934025	0.998909	1	1.17677	1.17399	1.08857	1.0479	1.15288
SPBC30D10.06	1	1.33247	0.743073	0.712337	0.771757	0.69562	1	1.51022	1.74523	1.20175	1.40088	0.92581
SPBC30D10.07c	1	1.13799	1.42798	1.0263	1.13477	1.77339	1	1.44123	1.81179	1.66432	1.60915	1.30929
SPBC30D10.10c	1	0.905578	1.47486	1.51105	1.42384	1.13546	1	0.996489	1.04735	1.53554	1.16023	1.34642
SPBC30D10.13c	1	1.06514	0.754745	0.691688	0.653284	0.609648	1	1.14072	1.20468	0.925108	1.07565	0.974839
SPBC30D10.14	1	4.82201	8.72423	13.0998	4.99485	2.31146	1	1.18824	1.64512	1.94613	1.87201	2.11012
SPBC30D10.17c	1	1.06011	1.2935	0.895004	1.15127	1.22997	1	1.05374	1.12916	1.18918	0.852419	0.9764
SPBC30D10.18c	1	0.814152	0.876916	0.422762	0.577254	0.862349	1	1.53306	1.80972	2.01413	2.02248	1.65422
SPBC31A8.01c	1	1.14268	1.84487	1.60487	0.890092	0.80787	1	0.839337	1.15562	1.04127	1.02995	1.01034
SPBC31E1.02c	1	0.855115	0.75484	1.21082	1.02813	0.881157	1	1.0324	1.10569	1.01451	1.11351	0.906296
SPBC31E1.04	1	1.41184	1.67126	3.18508	1.46363	1.0669	1	0.888538	0.862689	0.888815	0.634475	1.17515
SPBC31E1.06	1	0.676728	0.443706	0.716668	0.680539	0.906686	1	1.04572	0.96815	0.895732	0.903336	0.746448
SPBC31F10.04c	1	1.15195	1.66832	1.31539	1.184	1.63784	1	0.653946	0.733145	1.10715	1.011	1.02563
SPBC31F10.06c	1	0.932684	1.2075	1.0988	0.811555	0.781019	1	1.02632	0.785577	0.854026	0.943403	0.883526
SPBC31F10.07	1	1.49429	1.14798	1.5055	1.17842	1.05996	1	1.78219	1.37666	1.60233	1.63991	2.42066
SPBC31F10.11c	1	1.02014	1.15372	0.950272	1.41138	1.5655	1	1.05883	0.703842	0.826806	0.795648	0.587126
SPBC31F10.12	1	1.06048	1.31816	0.750161	0.930051	1.12462	1	1.21165	1.00863	0.99182	1.2263	1.1637
SPBC31F10.13c	1	1.12514	1.12418	1.31026	1.37548	1.23356	1	0.695558	0.755035	0.735047	1.0262	0.821773
SPBC31F10.16	1	1.62367	1.26602	1.29099	0.952214	1.15916	1	1.32991	1.20407	1.115	1.0557	1.12892
SPBC32F12.02	1	0.986788	0.756511	0.996324	1.19435	0.795734	1	1.68848	1.16969	0.81022	1.63588	1.16622
SPBC32F12.03c	1	3.94483	8.2961	12.964	6.34179	2.30551	1	1.0216	1.0747	1.43193	1.65243	1.93755
SPBC32F12.04	1	0.99056	1.08091	1.03377	1.11546	1.24459	1	1.29448	1.2684	0.511847	1.03345	1.26104
SPBC32F12.06	1	1.28337	1.09192	1.03969	0.809145	0.942161	1	0.616546	0.885357	1.0343	0.772164	1.23266
SPBC32F12.10	1	1.42923	2.64099	2.23064	1.50494	1.622	1	0.946774	1.02526	1.04804	1.07635	1.12633
SPBC32F12.11	1	1.00038	0.87697	0.994137	1.13035	0.800219	1	0.979429	1.10535	1.08753	1.17588	1.16487
SPBC32H8.08c	1	0.832683	0.700775	0.855533	1.01823	1.26571	1	1.48953	1.21841	0.797982	0.966701	0.743904
SPBC32H8.10	1	0.895305	0.919495	1.29449	1.00429	0.783632	1	1.05446	1.02378	0.828519	1.03102	1.02563
SPBC32H8.12c	1	1.07801	1.09432	0.691314	1.27154	1.18573	1	0.883153	0.895599	0.945611	0.912591	0.966375
SPBC336.02	1	0.23266	0.312373	0.389994	0.678178	1.12759	1	0.933189	0.724204	0.65415	0.522078	0.368791
SPBC336.04	1	0.642335	0.801783	0.760993	1.06039	0.973878	1	1.18855	0.626283	0.841647	0.978602	0.703491
SPBC336.06c	1	0.870304	0.800332	1.13301	1.08505	0.841858	1	0.419094	0.359967	0.387863	0.468002	0.182741
SPBC337.03	1	0.891867	0.931305	1.57018	1.33799	0.981918	1	1.32926	0.975593	0.727013	0.944475	1.34846
SPBC337.05c	1	0.7825	0.816123	0.881805	0.880366	0.862392	1	1.09646	1.0624	0.9434	0.949776	0.973392
SPBC337.07c	1	1.18762	1.43791	1.50176	1.58711	1.4596	1	1.01309	0.768929	1.41313	1.04416	0.92581
SPBC337.10c	1	1.22839	1.02747	1.6235	1.0642	1.13313	1	0.980919	1.07187	1.16789	1.28679	1.33398
SPBC337.14	1	1.01217	0.83687	1.13893	0.937978	0.810297	1	0.921625	1.49136	1.06592	0.937938	0.950159
SPBC337.15c	1	1.24482	1.43086	2.11142	1.45847	1.18065	1	0.95271	1.14731	1.03957	1.00063	1.43559
SPBC342.02	1	0.954622	1.04002	0.553563	0.846556	1.57124	1	0.986431	1.05855	0.931234	1.02431	0.989569
SPBC342.04	1	0.752312	0.884212	1.0803	1.29893	1.24296	1	0.724528	0.629185	0.813785	0.683561	0.949943
SPBC354.02c	1	0.930723	0.866071	0.865193	0.664788	0.858748	1	1.34373	1.46629	1.01835	0.866571	0.627991
SPBC354.04	1	1.13194	0.402197	0.62311	0.738284	0.758872	1	0.800917	0.885357	1.00146	0.797487	0.725233
SPBC354.07c	1	0.818756	1.08922	0.777486	1.07827	1.18817	1	0.887271	1.12979	1.04681	1.08009	1.01172
SPBC354.12	1	1.05156	0.99235	0.775471	1.185	1.12737	1	0.887882	0.887987	1.03772	0.94134	1.01418
SPBC354.14c	1	1.33026	1.71094	1.24292	1.6568	1.71253	1	1.33189	1.44991	1.09025	1.348	1.35223
SPBC359.02	1	2.19829	2.35141	4.03526	4.10602	3.92532	1	1.14795	0.946486	0.907815	1.54873	1.31589
SPBC359.03c	1	1.0752	1.31667	0.931313	1.83451	2.2375	1	0.744712	0.828355	0.426721	0.423023	0.530439
SPBC36.04	1	1.40342	2.17008	1.65482	1.56122	1.30134	1	1.08507	1.02856	0.941248	1.14692	1.01484
SPBC36.05c	1	0.733991	1.05071	1.10739	1.52758	0.965294	1	1.68848	1.32894	1.49885	1.45005	1.34783
SPBC36.07	1	0.541039	0.571847	0.59248	0.764738	1.01148	1	1.04334	1.08337	1.13201	0.880583	0.969129
SPBC36.09	1	0.690989	0.799295	0.654584	0.970436	1.05146	1	0.577261	0.528414	0.790694	0.874414	0.397322
SPBC365.01	1	1.11781	1.22533	1.72759	1.10476	0.879294	1	1.14311	1.0042	0.90676	0.976247	1.01609
SPBC365.03c	1	1.14357	0.660705	0.47182	0.434385	0.474514	1	0.868143	0.985509	1.01262	0.85021	0.811561
SPBC365.04c	1	0.490741	0.45998	0.449582	0.579109	0.763509	1	1.88358	1.19722	0.925108	0.933922	1.11657
SPBC365.05c	1	1.50233	2.80439	1.5832	1.53076	1.6396	1	1.26354	1.39104	1.5686	1.14382	1.26078
SPBC365.06	1	1.37165	0.836313	0.678726	0.867647	0.690079	1	0.893461	1.00815	0.925108	0.912449	0.940235
SPBC365.10	1	1.00643	1.33603	1.16209	1.19401	1.47404	1	1.15198	1.09534	1.07654	1.09645	1.35525
SPBC365.11	1	0.885886	0.904679	0.847594	0.731536	0.84215	1	1.33867	1.21841	0.663961	0.915785	0.568919
SPBC365.12c	1	14.8123	32.5999	44.4933	12.1629	2.60014	1	1.37288	2.55025	4.399	6.21397	4.95795
SPBC365.13c	1	1.02661	1.36337	1.01797	1.16227	1.05222	1	1.1806	1.30464	0.912169	1.10749	1.36751
SPBC365.14c	1	0.924455	0.972966	1.06327	1.03167	0.840769	1	0.920325	0.948205	0.860005	0.810636	0.824125
SPBC365.16	1	0.396852	0.266246	0.338253	0.625932	0.659778	1	0.711926	0.919819	0.97515	0.674	0.805814
SPBC36B7.03	1	0.937677	1.1188	1.39209	1.05356	1.12212	1	1.11193	1.13395	1.049	0.98444	0.858313
SPBC36B7.08c	1	1.34819	1.1998	1.11967	1.02531	0.943156	1	1.03941	0.982254	0.711856	1.00058	0.761705
SPBC3B8.01c	1	1.0518	0.673343	0.884021	0.737404	0.654603	1	1.40024	0.951455	1.01599	0.874698	0.677732
SPBC3B8.02	1	1.18233	0.963653	1.13541	0.802967	0.797658	1	0.81637	1.15165	1.20781	0.977624	1.20715
SPBC3B8.03	1	0.928594	0.829471	0.771396	0.754515	0.725504	1	1.01644	0.985994	1.05225	1.08183	1.03697
SPBC3B8.04c	1	1.0508	0.922095	0.925422	0.703737	0.778927	1	1.13686	0.733145	0.97971	0.904266	0.888591
SPBC3B8.09	1	0.597969	0.539938	0.428818	0.706102	1.17179	1	1.01309	1.11723	1.04003	1.14778	0.976998
SPBC3B9.01	1	2.74777	4.47229	4.72657	4.27417	3.63367	1	1.19183	1.31103	1.42571	1.87201	1.83245
SPBC3B9.03	1	0.805947	0.812148	0.668257	1.21249	1.03772	1	0.802505	0.83419	0.895732	0.92423	0.931802
SPBC3B9.07c	1	0.698521	0.349622	0.164326	0.406377	0.480648	1	0.971478	1.07861	0.858941	1.26347	0.879676
SPBC3B9.10	1	0.864757	1.09883	1.0573	1.45311	1.08136	1	0.949007	0.778725	0.993726	1.04416	1.07276
SPBC3B9.11c	1	1.13897	1.20535	1.09821	1.42754	1.53086	1	0.827184	1.06243	1.10312	0.571908	1.07569
SPBC3B9.14c	1	1.43927	0.806499	0.879889	0.917051	0.946691	1	1.09302	0.860765	0.85083	0.765584	0.768475
SPBC3B9.18c	1	1.57252	0.901356	0.929291	0.929982	0.728471	1	1.15907	1.15236	1.23239	1.15377	1.11479
SPBC3B9.19	1	0.956592	0.415118	0.397039	0.594213	0.564259	1	1.0817	1.34495	1.27245	0.991069	1.17776
SPBC3D6.02	1	1.01138	0.893365	0.90803	0.964445	1.04647	1	0.844514	0.889056	0.815184	0.972966	0.763911
SPBC3D6.04c	1	0.833223	0.939461	0.802902	1.29412	1.02233	1	0.815614	0.689864	1.23333	0.772164	0.912565
SPBC3D6.06c	1	0.964259	1.05928	0.86591	0.876299	0.892393	1	1.23309	1.84062	0.882056	1.09059	1.08308
SPBC3D6.08c	1	1.07535	0.724631	1.02765	0.935581	0.704905	1	1.04334	1.35623	1.06083	1.04076	1.19197
SPBC3D6.12	1	0.417683	0.385469	0.664667	0.739959	0.902437	1	1.18303	1.36241	0.928606	0.841237	1.08308
SPBC3D6.13c	1	1.23075	1.78832	2.1309	1.66324	1.72215	1	1.04609	1.07243	0.995484	0.957503	1.0683
SPBC3E7.02c	1	10.5037	17.644	34.3925	31.4622	18.3018	1	1.23309	1.54561	2.71616	3.25759	4.32045
SPBC3E7.05c	1	1.07653	1.78004	1.36492	1.38737	1.29878	1	1.10202	1.10936	1.19334	1.1232	1.11294
SPBC3E7.07c	1	1.03062	0.867478	0.779219	0.713373	0.815497	1	1.183	1.08709	1.1972	1.30637	0.989411
SPBC3E7.10	1	1.17485	1.32528	1.16603	0.912148	1.05494	1	0.869415	0.77648	0.83893	0.926306	0.815091
SPBC3E7.11c	1	0.998242	0.998232	0.919091	0.978316	1.13694	1	1.29592	0.777618	0.817688	0.830621	0.924494
SPBC3E7.14	1	1.12754	0.868651	0.911751	0.788112	1.02451	1	1.23309	1.15663	1.1011	0.762544	0.995216
SPBC3E7.16c	1	0.746553	0.774007	0.889058	0.757874	0.611144	1	0.857574	0.950689	0.842192	0.879219	0.868132
SPBC3F6.01c	1	1.28599	0.913152	0.868717	0.831502	0.758589	1	0.868858	0.950521	0.873909	0.819339	0.820113
SPBC3F6.02c	1	1.17707	1.00455	1.38579	1.30932	0.875461	1	1.14367	1.04809	1.12908	1.15505	1.12499
SPBC3F6.03	1	3.86228	5.73503	17.0974	4.82368	1.3179	1	1.12404	1.28744	1.87036	2.89689	2.73149
SPBC3F6.04c	1	0.509019	0.508706	0.455292	0.911416	1.34616	1	1.44171	1.42787	1.26572	1.28197	1.10273
SPBC3H7.01	1	1.13464	0.965806	1.10082	1.10286	0.746808	1	1.05257	0.792819	0.803965	0.787605	1.07543
SPBC3H7.03c	1	0.876398	1.15556	0.77709	0.880571	0.881889	1	1.13094	0.977241	0.974865	1.07253	0.910408
SPBC3H7.07c	1	0.679358	0.672546	0.411711	0.702849	0.675846	1	0.955149	0.837104	0.497629	0.962664	0.727914
SPBC3H7.11	1	0.469715	0.516128	0.39126	0.68895	0.867063	1	0.992734	0.772803	0.828718	0.577179	0.588484
SPBC3H7.15	1	1.11354	1.18141	1.25809	1.0915	1.15543	1	0.833945	0.908435	1.10196	1.24445	0.977904
SPBC4.03c	1	1.33221	0.815736	1.51899	1.46331	1.20253	1	1.1486	1.02558	0.906532	0.842436	0.912534
SPBC4.04c	1	0.674908	0.678732	0.8497	1.01255	1.00102	1	1.01465	1.0039	1.24904	1.22438	0.697856
SPBC4.05	1	1.22914	0.803845	0.899032	1.25289	0.888865	1	1.13267	0.634922	1.05984	0.990573	0.990857
SPBC4.06	1	1.17896	1.26286	1.21808	1.73399	1.33027	1	1.21687	1.22372	1.02518	1.0901	1.20182
SPBC4.07c	1	1.44181	1.46657	0.986218	1.28984	1.50365	1	1.17672	1.29177	1.2104	1.2796	1.31119
SPBC405.04c	1	1.56767	1.91179	2.46589	1.59122	1.08977	1	1.04215	1.17201	1.03704	1.12012	0.943673
SPBC405.06	1	0.747754	0.808871	0.886114	0.960599	0.972526	1	1.16981	0.96523	1.1011	1.20569	0.861882
SPBC405.07	1	1.06391	0.725155	0.614843	0.615062	0.673064	1	0.869908	0.889308	0.95273	0.878005	0.951386
SPBC409.05	1	1.06006	1.00773	1.6758	1.05295	1.02002	1	1.03411	0.742485	0.945222	1.08357	1.00348
SPBC409.06	1	1.09582	1.22972	1.84949	1.2693	1.03312	1	1.67306	1.44185	1.52777	1.02675	1.04013
SPBC409.07c	1	0.783207	0.432981	0.483368	1.06222	0.874239	1	1.06954	1.09745	1.1157	1.14778	1.27013
SPBC409.10	1	1.01705	0.916438	0.563089	1.08631	1.03167	1	1.11219	1.02146	1.15834	1.05783	1.02644
SPBC409.13	1	4.32363	7.32736	19.9524	14.4607	4.63448	1	1.25115	1.46629	1.5584	3.14137	4.3137
SPBC409.15	1	0.519093	0.470057	0.376789	0.745883	0.986578	1	0.587854	0.604028	1.04366	0.689747	0.752791
SPBC409.19c	1	1.49254	1.41581	1.95261	1.35679	1.255	1	1.84964	1.44108	1.39465	2.51368	2.14248
SPBC409.20c	1	1.51336	1.052	0.747895	0.98016	0.956488	1	0.916671	0.975633	0.976658	1.12956	1.0166
SPBC428.03c	1	0.609975	0.350615	0.258293	0.49458	0.608237	1	1.06789	1.64618	1.16279	1.12782	1.15936
SPBC428.05c	1	1.28432	0.944333	0.826515	1.05222	0.798896	1	1.03523	1.01879	1.03534	0.960406	0.963604
SPBC428.10	1	4.94085	11.9767	11.8461	4.96534	2.60395	1	0.693615	1.19488	1.86462	2.19762	2.21562
SPBC428.11	1	0.843561	0.55359	0.247696	1.26591	1.40055	1	0.993164	1.04033	1.06508	0.981758	1.08534
SPBC428.14	1	1.61857	1.05548	0.836691	1.0822	0.936798	1	1.11748	1.01669	1.14746	1.15412	1.12098
SPBC428.16c	1	1.33564	1.04489	1.19218	1.46168	0.919125	1	1.06476	1.18667	1.27537	0.997309	1.06391
SPBC428.19c	1	0.493727	0.432679	0.513901	0.585892	1.11671	1	1.14435	1.4005	1.03677	0.917864	1.29871
SPBC4B4.01c	1	0.938356	1.20763	0.96092	1.04123	1.36395	1	1.30789	0.992683	1.15639	0.891618	1.16774
SPBC4B4.03	1	1.28985	1.77051	1.27658	1.2015	1.52966	1	1.40962	1.23473	1.24742	0.73833	1.1191
SPBC4B4.04	1	1.16882	1.44978	1.12313	1.38674	1.8944	1	0.989666	1.02955	0.908168	0.748093	0.878039
SPBC4B4.08	1	2.44653	5.30555	1.18044	0.858022	1.0308	1	1.05848	1.28723	1.54301	1.46272	1.12493
SPBC4B4.09	1	0.773282	0.519936	0.671696	0.705173	0.761382	1	0.981868	1.11168	1.18145	1.15631	0.792929
SPBC4C3.03	1	0.975646	0.808864	0.465458	0.85602	0.91029	1	1.26616	1.05572	0.861803	0.935969	0.853456
SPBC4C3.05c	1	0.906129	0.339461	0.528306	0.649251	0.804228	1	1.10385	0.881194	0.816169	0.697246	0.705435
SPBC4C3.06	1	0.980469	1.31555	1.04381	1.31447	1.01326	1	0.902531	0.862126	1.02369	0.869775	1.02701
SPBC4C3.07	1	1.3558	0.631771	0.448811	0.911232	0.897257	1	0.944087	0.880203	0.811275	0.817051	0.807449
SPBC4C3.10c	1	0.946421	1.58151	2.09987	1.69856	1.19252	1	1.20615	0.972627	1.26404	1.32547	1.1488
SPBC4F6.04	1	1.36762	0.671223	0.356674	0.555249	0.508567	1	1.699	1.55524	1.15639	1.69173	1.45047
SPBC4F6.05c	1	0.855703	0.984708	0.689156	1.12052	0.953493	1	0.93213	0.783765	0.979927	0.904266	0.876821
SPBC4F6.06	1	2.01757	3.66559	2.35051	1.67814	1.48817	1	1.22342	1.25208	1.31848	1.10749	1.10781
SPBC4F6.07c	1	0.425935	0.281694	0.368483	0.426609	0.724824	1	1.33842	1.20468	0.962883	0.612191	0.522227
SPBC4F6.10	1	0.947361	1.23696	1.50236	1.44337	1.11762	1	1.16092	1.48834	1.85721	1.09059	1.58623
SPBC4F6.14	1	0.600424	0.520161	0.3785	0.598994	1.32276	1	1.05342	1.11373	0.769737	0.66355	0.813464
SPBC4F6.16c	1	1.42975	2.17368	3.74135	2.93023	1.73874	1	1.10448	1.0551	1.30317	1.71545	1.77547
SPBC4F6.17c	1	3.3695	6.27215	11.9169	8.9918	4.05971	1	1.06015	1.33185	1.83159	2.23639	2.38368
SPBC4F6.18c	1	1.26916	0.819484	0.804967	0.698468	0.784611	1	0.899325	1.10546	1.25115	1.04841	1.17481
SPBC530.03c	1	1.51262	1.13572	0.672706	1.01554	0.9626	1	0.978737	0.97652	1.08072	1.07443	1.05927
SPBC530.04	1	1.08223	1.62903	1.27716	1.50279	1.70286	1	0.881781	0.807166	0.763883	0.787062	1.07124
SPBC530.05	1	1.68205	2.00331	1.64507	1.44508	1.38415	1	0.936601	0.914392	0.912169	0.86879	0.692467
SPBC530.10c	1	1.10616	1.70803	1.10837	0.804161	0.86963	1	1.20355	1.31728	1.18832	1.1485	1.20436
SPBC530.12c	1	1.40815	1.00745	1.0362	0.920778	0.741377	1	1.0378	0.977527	1.07654	1.23055	1.30929
SPBC530.14c	1	1.26357	1.45701	1.03411	1.87499	2.02503	1	1.42703	0.831308	1.31122	1.10749	1.3977
SPBC543.02c	1	0.957974	0.964846	0.587553	0.870928	1.13364	1	1.20431	1.09579	1.00342	0.970899	0.955963
SPBC543.09	1	1.2334	1.88038	1.95989	1.49193	1.54099	1	1.11237	0.779672	0.86051	0.968856	0.869109
SPBC543.10	1	1.60597	1.02565	1.05087	0.997452	0.78173	1	0.807249	1.56753	1.19431	1.18396	1.11657
SPBC557.03c	1	0.963737	1.2346	1.14011	1.41397	1.18989	1	0.993941	0.965026	0.95322	1.0308	0.952704
SPBC557.04	1	0.984714	1.09527	1.61891	1.10236	0.909418	1	0.871928	1.03948	1.08857	1.11033	1.22314
SPBC56F2.02	1	1.02062	0.83534	0.647647	0.731472	0.731997	1	1.32881	1.19882	1.18936	1.07492	0.961792
SPBC56F2.04	1	0.579856	0.429865	0.362503	0.557125	0.797681	1	1.34863	1.44972	0.821843	0.766911	0.759482
SPBC56F2.06	1	6.36004	17.5714	19.6367	9.66154	4.03159	1	1.06789	1.87813	3.98911	3.55291	3.24334
SPBC56F2.07c	1	0.681656	0.652465	0.612868	0.934712	0.89304	1	1.10649	1.01643	1.03206	0.713956	0.839237
SPBC56F2.08c	1	0.978321	0.956397	0.731727	0.940248	1.41553	1	1.07339	0.943784	0.947745	0.793743	0.773185
SPBC56F2.12	1	0.907244	0.73667	0.581961	0.723268	0.699315	1	1.05006	1.07765	0.948298	0.867735	1.06388
SPBC577.06c	1	1.05768	1.14434	1.45873	1.27651	1.23195	1	1.51549	1.19082	1.22252	0.990573	1.26296
SPBC577.08c	1	1.01832	1.07739	1.87718	1.6691	1.08869	1	0.926731	1.00043	0.783475	1.05561	0.803031
SPBC577.10	1	0.99561	1.61291	1.74442	1.62493	1.39672	1	1.00662	1.14875	1.22893	1.22731	1.34402
SPBC577.11	1	0.993711	1.18846	1.17898	2.03256	1.57025	1	1.03398	1.0039	1.52975	1.03597	1.79282
SPBC577.12	1	0.672792	0.58894	0.455267	0.907172	0.84766	1	1.02984	0.967085	0.930872	0.978113	0.700641
SPBC577.15c	1	1.19485	1.05749	0.978504	0.98691	1.27622	1	1.23584	0.758877	0.874145	0.604188	0.730966
SPBC582.03	1	0.965394	1.13437	0.83611	1.00198	1.34316	1	1.63123	1.55524	1.56575	2.85954	1.65143
SPBC582.07c	1	1.10142	1.63554	1.64042	1.79814	1.1821	1	1.25211	0.999108	1.00905	1.06762	1.0396
SPBC582.08	1	0.77799	0.790214	0.719692	0.894536	0.741561	1	1.2295	1.26615	1.11691	0.790454	1.0542
SPBC582.09	1	1.46814	1.01224	0.959868	1.19574	1.113	1	1.17252	1.02427	1.41067	0.962664	1.03278
SPBC609.05	1	1.02618	1.2989	1.36043	1.18993	0.967603	1	1.19373	1.45833	1.15206	1.1053	1.2422
SPBC646.04	1	1.01201	1.10852	0.85844	1.24074	1.47165	1	1.17787	0.932867	0.823321	0.950981	0.830322
SPBC646.05c	1	1.43862	1.13799	1.42323	1.15551	1.07582	1	1.16257	1.3246	1.12392	1.22008	1.1446
SPBC646.07c	1	0.890814	0.962304	1.02392	0.958296	1.01935	1	1.40279	1.43213	1.05356	0.984035	1.34222
SPBC646.08c	1	0.887192	1.1779	1.36725	1.28282	1.12181	1	0.842179	0.976137	0.840045	0.946871	0.955112
SPBC646.09c	1	0.727523	0.77979	0.664599	0.78168	0.750511	1	0.964871	1.05544	1.0581	1.11017	1.01327
SPBC646.10c	1	0.903525	0.906026	0.551361	0.734712	0.978847	1	1.09964	1.13892	0.994532	0.96041	0.979172
SPBC646.11	1	0.721284	0.67217	0.518149	0.902344	0.882115	1	1.00502	0.953765	1.00302	0.985038	0.885511
SPBC646.13	1	1.21941	2.09883	2.85821	1.42732	1.04759	1	0.920405	1.08844	1.00214	1.13405	1.19366
SPBC646.15c	1	1.01906	0.922004	1.35128	1.15451	0.903433	1	0.988674	1.10841	1.65857	1.18396	0.766644
SPBC646.16	1	1.09611	1.21298	2.11787	1.64732	1.16508	1	1.0267	1.17796	0.973852	0.930604	0.918118
SPBC651.08c	1	0.756632	0.777276	0.793407	0.995852	1.46254	1	0.784428	0.846563	0.801762	0.775661	0.831336
SPBC651.09c	1	1.24178	1.7119	3.52627	2.21348	1.14331	1	0.897207	0.927363	1.44831	0.923563	1.12475
SPBC660.07	1	6.71269	9.10969	10.8033	3.5798	1.76376	1	0.98312	1.46388	1.89609	2.65072	2.46451
SPBC660.11	1	1.64435	2.3039	3.39841	1.94145	1.31005	1	0.869111	0.919295	1.16867	1.16841	1.2336
SPBC660.12c	1	0.787809	1.13943	0.872936	1.10296	1.00082	1	1.75936	1.1577	1.80306	1.3035	1.92136
SPBC660.13c	1	1.61606	1.92434	1.88222	1.63729	1.6139	1	1.12485	1.08276	1.08434	1.00402	1.29388
SPBC660.15	1	1.18521	1.07389	0.888892	0.745746	0.978404	1	0.822062	0.832914	1.10827	0.666469	0.890714
SPBC660.16	1	1.48114	1.30125	1.67413	1.51121	0.937107	1	0.91641	1.00969	0.922231	1.02081	1.04557
SPBC685.06	1	0.967074	0.665836	0.50964	0.443632	0.554313	1	1.04263	1.00565	1.14371	1.14125	0.851165
SPBC685.07c	1	1.52183	0.66378	0.519781	0.538512	0.447232	1	1.06281	1.13178	0.958291	1.07437	0.931998
SPBC691.03c	1	0.884316	0.596628	1.30749	1.04371	0.933507	1	0.653946	0.558518	0.633378	0.678199	0.577879
SPBC691.04	1	1.02137	0.509371	0.493769	0.595632	0.739706	1	1.1105	0.939226	0.826066	0.803239	0.83464
SPBC6B1.06c	1	0.896325	1.58319	1.69484	1.31011	1.17023	1	1.15051	1.09388	1.27115	1.25868	1.03844
SPBC6B1.07	1	1.50501	1.13357	1.59835	0.800743	0.651525	1	1.13353	0.691216	0.736335	0.633779	0.615728
SPBC6B1.08c	1	0.752524	0.921768	0.662536	0.804599	0.94482	1	1.05285	0.974467	0.864255	0.589922	0.729251
SPBC6B1.10	1	1.04306	0.915231	1.17399	1.05888	0.942274	1	0.704624	0.688389	0.565868	0.447495	0.690698
SPBC713.02c	1	1.97382	2.47052	3.8057	1.51609	1.03741	1	1.1772	1.20981	1.25944	1.31858	1.21694
SPBC713.03	1	0.855254	0.90823	0.552761	0.917924	1.08358	1	1.03264	1.21953	0.942958	0.94697	1.16158
SPBC713.04c	1	0.66064	0.700548	0.521036	0.770908	1.43101	1	0.985161	1.09742	0.682445	0.744347	0.674744
SPBC713.07c	1	1.4492	1.72515	2.29284	1.01619	0.705344	1	0.854312	0.822953	0.854474	0.857862	0.69056
SPBC713.09	1	1.30652	2.30118	2.69467	1.45397	1.09399	1	0.625292	0.76392	1.22068	1.13356	0.857134
SPBC713.10	1	0.883984	0.55087	0.601541	0.602908	0.847809	1	0.959731	1.29204	1.27283	0.864254	0.88949
SPBC713.12	1	0.955186	0.98374	0.450617	0.854067	1.0061	1	1.0395	1.12838	0.938231	0.990573	0.946927
SPBC725.01	1	1.14309	0.831266	1.0829	0.805035	0.50204	1	1.00199	0.866862	1.0055	0.889622	0.948627
SPBC725.02	1	3.55101	3.75188	4.79176	1.32723	1.6136	1	1.02502	1.08812	1.37575	1.35693	1.19598
SPBC725.03	1	15.4423	38.0833	48.3542	7.35522	2.31651	1	2.89186	4.34972	7.58175	11.8133	8.75635
SPBC725.05c	1	0.853287	1.02049	1.16714	1.04042	0.958715	1	1.15051	1.6969	1.43637	1.53801	1.08111
SPBC725.08	1	1.19782	1.36139	1.27055	1.3422	1.53184	1	1.23895	1.09018	0.879385	1.0762	1.01674
SPBC725.09c	1	1.2861	1.35956	1.93225	1.27304	1.11428	1	1.02082	1.11137	1.22681	0.998229	1.17336
SPBC725.14	1	1.14403	1.58343	1.05485	1.07562	1.25885	1	1.12269	1.84248	1.46272	1.22731	1.30301
SPBC725.15	1	0.638721	0.529279	0.310174	0.568293	0.663798	1	1.05694	1.17253	1.11945	1.08389	1.01762
SPBC776.02c	1	1.37372	0.931124	1.24169	0.918752	0.982616	1	1.07508	1.52458	1.01193	1.06943	0.897512
SPBC776.04	1	0.925	1.00018	0.773596	1.10512	1.13446	1	1.20012	0.975074	0.95305	0.969617	0.788252
SPBC776.07	1	1.10898	1.55299	1.41948	1.30514	1.12488	1	0.945419	0.919133	0.714441	1.17345	1.0387
SPBC776.08c	1	0.488543	0.488848	0.546576	0.89026	1.28001	1	0.7639	1.01757	0.69499	0.718938	0.573027
SPBC776.09	1	1.04342	1.70717	1.37848	1.49747	1.59577	1	1.18072	1.26935	1.06914	1.07369	1.21855
SPBC776.11	1	1.21977	0.625338	0.336017	0.516336	0.516012	1	1.0984	1.07966	1.12938	0.906318	1.00152
SPBC776.14	1	0.668242	0.715376	0.769351	1.0736	0.9213	1	0.634421	0.876276	0.709526	0.620321	0.651388
SPBC776.15c	1	1.11296	1.82708	1.05315	1.72065	1.78953	1	1.14334	1.01921	1.1916	0.929155	0.950056
SPBC800.03	1	1.08721	0.739942	0.619866	1.19899	0.843405	1	1.03398	1.37159	1.26676	1.1674	1.15093
SPBC800.04c	1	1.13735	0.74759	0.54463	0.452449	0.666874	1	0.648348	0.749133	0.876301	0.317727	0.644651
SPBC800.05c	1	1.07162	0.664827	0.760037	1.19474	0.883026	1	1.2494	1.30731	1.208	0.824296	1.15668
SPBC800.06	1	0.392922	0.346119	0.356304	0.721117	0.914599	1	1.05446	0.943778	1.01237	0.969717	0.866337
SPBC800.08	1	0.978205	0.742895	0.55979	0.799181	1.10362	1	1.32644	1.07321	1.19538	1.63912	1.2857
SPBC800.09	1	0.981717	0.845622	1.25755	1.08089	1.04091	1	0.887056	0.648418	1.04003	0.9436	0.932519
SPBC800.10c	1	1.22348	0.886528	1.58378	1.15664	0.994129	1	1.05365	0.865879	1.00258	0.931674	0.980723
SPBC83.01	1	1.24885	1.90226	1.59305	1.61266	1.63379	1	1.0187	0.977527	0.999231	0.978113	0.965364
SPBC83.02c	1	1.54908	0.821026	0.661603	0.781843	0.640664	1	0.793529	0.766569	0.874387	0.668563	0.616351
SPBC83.08	1	1.15773	1.27837	0.782756	1.06662	1.30351	1	1.12463	1.17885	1.06944	0.956985	1.03765
SPBC83.13	1	1.0821	1.46078	0.732774	1.29117	1.48381	1	1.11067	1.68599	0.993726	1.1493	1.69619
SPBC83.14c	1	0.779991	0.887556	0.942856	0.931029	1.00876	1	0.998919	0.649864	0.927171	1.06035	0.707755
SPBC83.15	1	0.351504	0.255311	0.369946	0.537874	0.84877	1	1.06569	1.05937	0.884174	1.01543	0.88949
SPBC83.17	1	2.70749	2.74029	2.24068	1.91109	1.21479	1	0.88031	1.00815	1.18083	1.36799	1.23696
SPBC839.02	1	1.74567	1.0908	1.45451	1.07579	0.992076	1	0.902531	0.625228	0.950296	0.728678	0.763469
SPBC839.03c	1	1.29432	0.844506	0.643415	0.812927	0.877345	1	1.85896	1.4439	0.805203	1.17797	1.06461
SPBC839.04	1	1.11404	0.659769	0.338888	0.671756	0.63708	1	0.988674	0.945221	1.01389	0.663672	0.862473
SPBC839.05c	1	0.916811	0.617554	0.40121	0.438543	0.432514	1	0.998511	0.940518	1.0129	1.06264	1.04743
SPBC839.07	1	0.752177	0.396057	0.819262	1.04358	0.84032	1	1.09563	0.770766	0.924093	1.08789	0.765803
SPBC839.08c	1	1.12694	0.608207	0.815898	0.823258	0.747277	1	0.94471	0.673061	0.862668	0.905777	0.821878
SPBC839.10	1	0.951539	1.06799	0.837247	1.16732	1.1725	1	0.877361	0.658018	0.828519	0.969717	1.269
SPBC839.13c	1	1.24816	0.736654	0.644237	0.593803	0.621079	1	0.943606	0.805716	0.878303	0.82891	0.74822
SPBC839.16	1	1.02989	0.994742	0.892679	1.56157	1.11282	1	1.11635	1.06292	1.04295	1.07106	1.13809
SPBC839.17c	1	1.11579	1.42794	1.25434	1.58139	1.53476	1	1.55059	0.887883	1.78398	1.38129	1.65614
SPBC887.03c	1	0.761276	0.686728	0.90493	0.760494	0.871676	1	0.502196	0.825962	0.60853	0.532023	0.829335
SPBC887.04c	1	1.22842	1.65086	2.02554	1.88015	1.66234	1	1.24536	0.790668	0.819447	0.982924	1.09926
SPBC887.10	1	1.005	0.936655	0.977924	0.852746	0.924442	1	1.26636	0.954585	0.980373	0.795259	1.15936
SPBC887.12	1	1.05529	1.32136	1.45901	1.39484	1.27017	1	1.12666	1.08507	1.09994	1.18396	1.33456
SPBC887.17	1	0.429711	0.141612	0.165276	0.389464	0.811458	1	0.899742	1.288	0.852288	0.803792	0.679522
SPBC8D2.06	1	0.954806	1.00016	0.561857	0.858949	1.00176	1	1.00853	1.00684	0.940373	0.945008	0.921853
SPBC8D2.10c	1	0.670829	0.483849	0.339598	0.635441	0.823227	1	1.03533	1.07794	0.874002	0.797487	0.889192
SPBC8D2.12c	1	0.793429	0.745782	1.07966	1.08741	0.916504	1	1.36324	1.05585	0.726834	1.12782	0.759729
SPBC8D2.15	1	0.781079	0.750268	0.469077	0.964632	0.923575	1	1.76859	0.991393	1.00938	0.966701	0.964672
SPBC8D2.17	1	0.732209	0.944297	0.757033	1.0368	1.58966	1	0.864379	1.23031	1.21852	0.888538	1.22116
SPBC8D2.18c	1	1.12904	1.08787	0.582148	0.983924	1.05873	1	0.984614	0.902227	0.850691	0.808184	0.891828
SPBC8D2.20c	1	1.00319	1.46923	1.18481	1.27699	1.46908	1	1.04258	1.07698	1.0694	0.968479	0.976895
SPBC8E4.01c	1	0.251749	0.219123	0.0570587	0.656432	0.693648	1	1.05556	0.927507	0.537291	0.291923	0.595812
SPBC8E4.03	1	0.991164	0.954451	1.19948	1.63405	0.910032	1	1.03941	0.988944	1.00871	1.13627	1.14353
SPBC8E4.04	1	1.26939	2.67855	2.7915	2.9452	1.94422	1	1.11659	1.20071	1.1836	1.40694	1.69051
SPBC902.04	1	0.61427	0.646762	0.68533	0.858892	0.89376	1	1.02243	1.07039	1.16648	0.95631	0.822604
SPBC902.05c	1	1.23891	1.27068	1.94163	1.37827	1.11934	1	0.943135	1.20913	1.17542	1.26274	1.27112
SPBC947.01	1	1.20854	1.52372	1.03342	1.49569	2.17554	1	0.716362	0.737713	1.05034	1.10749	1.26772
SPBC947.02	1	0.76462	1.14612	0.986546	1.0006	0.993207	1	1.0847	1.05455	1.17803	1.10367	1.24716
SPBC947.13	1	0.867655	1.08522	1.07149	1.00109	1.03204	1	1.03398	1.41973	1.29288	1.1674	0.904524
SPBC947.14c	1	1.56632	1.67493	2.38259	1.87399	0.879396	1	1.17571	1.21746	1.13873	1.17797	1.04445
SPBC947.15c	1	2.08547	2.06211	1.34157	0.849782	0.972336	1	1.29747	1.43542	1.23794	0.865768	1.06556
SPBC9B6.04c	1	0.896359	1.03428	1.22333	0.98024	0.833172	1	1.12624	1.10029	1.07967	0.980346	1.14917
SPBC9B6.05c	1	0.907705	0.691488	0.770126	0.896836	0.627799	1	0.856216	0.897916	0.67711	0.936004	0.966977
SPBC9B6.07	1	0.34333	0.356885	0.361372	0.646082	0.907831	1	0.963114	0.911419	0.815729	0.650032	0.655358
SPBC9B6.08	1	1.3793	1.16404	0.876237	1.45023	1.00669	1	0.964033	1.03682	1.24589	1.31894	1.13085
SPBC9B6.09c	1	1.5642	1.09719	0.855248	0.886662	1.01641	1	1.21758	1.03682	0.962883	0.660382	1.14414
SPBC9B6.10	1	1.47714	1.83588	2.25164	2.27931	1.88255	1	1.32688	1.34556	1.1745	1.50143	1.37946
SPBC9B6.11c	1	1.13014	1.22067	0.766275	1.06201	1.22735	1	0.97122	1.16814	1.07438	1.07512	0.963381
SPBP16F5.03c	1	0.906281	0.972327	0.896217	1.33022	1.36198	1	0.639065	0.820809	0.781051	0.517745	0.665621
SPBP16F5.06	1	0.523494	0.557324	0.583124	0.605592	0.814974	1	0.927263	0.876276	0.797982	0.966701	0.644651
SPBP16F5.07	1	1.04519	1.09462	1.45548	1.16812	0.808834	1	1.25069	1.15982	1.00057	0.991897	1.14894
SPBP16F5.08c	1	1.51017	0.689732	0.593145	0.708462	0.972318	1	1.00869	1.1549	0.977324	1.02692	0.887267
SPBP19A11.06	1	1.15426	1.26898	1.20373	0.983422	0.89083	1	0.547816	1.14899	0.88784	0.803461	0.784322
SPBP22H7.02c	1	0.524622	0.492207	0.409039	0.784545	1.28355	1	0.75111	0.837114	0.800979	0.644126	0.632961
SPBP22H7.07	1	1.10498	0.820848	1.06247	0.833314	0.769591	1	1.00867	0.627268	0.766375	0.804161	0.781755
SPBP22H7.08	1	1.03405	0.682471	0.581296	0.506511	0.526644	1	1.19455	1.1542	1.13647	1.3	1.06932
SPBP23A10.07	1	0.561177	0.378974	0.551595	0.592197	0.789992	1	1.04384	1.00111	1.05409	0.884631	0.914588
SPBP23A10.08	1	0.987671	1.25618	0.991102	1.04498	1.31413	1	1.16112	0.852188	0.786191	0.748109	0.931962
SPBP23A10.11c	1	0.226135	0.195452	0.118053	0.388345	0.661816	1	0.94179	1.18812	0.825088	0.642634	0.777479
SPBP23A10.15c	1	1.11871	1.01612	1.21116	0.779427	0.945058	1	1.20724	1.26632	1.10839	1.2243	1.16018
SPBP23A10.16	1	0.974748	0.873709	0.647193	0.58482	0.908379	1	1.15345	1.84504	1.76411	1.72437	1.7854
SPBP26C9.02c	1	1.72872	5.39075	10.4019	8.61812	3.61758	1	1.03617	0.917652	1.09025	1.08679	1.0883
SPBP35G2.05c	1	0.559817	0.647206	0.986319	1.0932	1.04146	1	1.37864	1.69313	2.0686	2.39246	1.30929
SPBP35G2.07	1	0.945911	0.808306	0.413257	0.791327	0.72244	1	1.01859	0.968408	0.938314	0.919147	0.850918
SPBP35G2.12	1	1.5107	1.54574	2.40787	2.06585	1.4257	1	0.819457	0.894197	1.19954	1.02015	1.26781
SPBP35G2.14	1	1.349	2.33496	1.92204	1.42566	1.55081	1	1.11942	0.951563	1.2606	1.34849	1.19117
SPBP4H10.04	1	0.879462	1.18979	1.27742	1.09435	1.04411	1	0.860677	0.835639	0.839073	0.94397	0.811989
SPBP4H10.05c	1	1.12638	1.02253	1.03603	0.727286	0.689807	1	1.13267	0.946486	1.0343	0.8088	1.02943
SPBP4H10.08	1	0.99327	0.925537	1.049	0.690056	0.736273	1	1.00177	1.18216	0.967501	0.93974	0.927492
SPBP4H10.11c	1	1.03787	1.33857	0.735434	1.07701	1.58165	1	1.01745	1.01514	0.832693	0.913088	0.877517
SPBP4H10.12	1	1.54567	1.64074	1.58785	3.16544	1.36489	1	1.14311	1.0582	1.51266	1.9708	2.33686
SPBP4H10.13	1	1.36444	0.643903	0.317914	0.588774	0.472109	1	1.14345	0.965785	1.10805	1.07669	1.18936
SPBP4H10.15	1	1.47523	0.785215	0.580817	0.567506	0.623086	1	1.07709	0.956033	0.960619	0.823124	0.828944
SPBP4H10.17c	1	1.1225	1.9361	2.03973	2.09587	1.2658	1	0.721356	0.782021	0.815869	1.17722	0.993823
SPBP4H10.20	1	0.890899	1.1378	0.811492	0.964153	1.16607	1	1.08749	0.956945	0.801167	0.887362	0.691312
SPBP8B7.03c	1	1.05829	0.701594	0.53625	0.524311	0.496666	1	0.990483	0.892954	0.825727	0.905614	0.885879
SPBP8B7.05c	1	0.965147	0.768642	0.581816	1.45654	1.90013	1	0.966677	0.947075	0.847863	0.946629	0.918307
SPBP8B7.06	1	1.13084	0.637657	0.360266	0.571988	0.522565	1	0.872638	0.761328	0.807872	0.769676	0.753267
SPBP8B7.09c	1	0.573562	0.331417	0.599349	0.509173	0.57874	1	0.969674	0.906584	0.787869	0.721536	0.942799
SPBP8B7.11	1	0.938077	0.845619	1.16582	0.882952	0.758766	1	0.967389	1.07916	1.07338	0.9126	1.09374
SPBP8B7.15c	1	1.57227	1.62966	1.54582	0.68177	1.1067	1	1.25221	0.819681	0.67711	1.02534	1.08111
SPBP8B7.16c	1	0.502966	0.471077	0.291075	0.496074	1.43439	1	1.05055	1.15749	0.9857	0.883401	0.889329
SPBP8B7.17c	1	1.47459	1.04171	0.744795	1.08794	0.796668	1	1.01115	1.01879	1.36713	1.15729	1.39089
SPBP8B7.18c	1	1.22774	2.0139	1.27339	0.918745	0.912338	1	0.998919	0.96986	0.967501	1.10749	0.88548
SPBP8B7.19	1	0.953292	1.32439	1.29161	1.29968	1.3704	1	1.02671	1.04238	0.965676	0.989019	1.05284
SPBP8B7.20c	1	0.378754	0.317643	0.26525	0.60724	0.965447	1	1.06628	0.922557	0.905778	0.788788	0.885773
SPBP8B7.21	1	0.865787	0.894185	0.741031	0.893256	0.807339	1	0.781615	0.862475	0.731362	0.764244	0.646089
SPBP8B7.23	1	1.08585	1.78421	1.99395	1.7423	1.33001	1	1.62224	1.25346	1.36825	1.18964	1.46894
SPBP8B7.25	1	1.35617	0.885309	0.573918	0.793711	0.665776	1	0.943142	0.886842	1.13706	1.22505	0.981755
SPBP8B7.26	1	1.05823	1.37362	1.28864	1.67792	1.31329	1	0.642427	0.702642	1.07614	0.935773	1.09374
SPBP8B7.29	1	1.07625	1.27712	1.22389	1.35166	1.30924	1	1.24024	1.06905	1.16213	0.884523	0.89177
SPBP8B7.31	1	1.61514	1.32482	1.05715	1.1966	0.845878	1	1.25221	0.96986	1.3436	1.03597	0.888225
SPBPB10D8.02c	1	2.15033	3.63934	3.75834	1.62454	2.24861	1	1.06789	1.29603	2.55977	3.38345	2.3686
SPBPB2B2.13	1	1.29124	2.01182	2.68412	1.23776	1.93014	1	0.895453	0.897916	1.05563	0.772164	0.8632
SPBPB7E8.02	1	2.19152	3.03897	1.56064	1.99971	2.0911	1	1.07216	1.13477	1.14707	1.16803	1.07473
SPBPJ4664.04	1	0.928907	0.682316	0.769194	0.845016	0.691194	1	1.06906	1.08862	1.0362	0.928051	0.999871
SPBPJ4664.06	1	1.50925	0.879562	1.58348	0.841047	0.943964	1	1.12599	1.15966	0.997042	1.05725	1.12739
SPCC1020.06c	1	1.40823	1.64064	2.19444	2.8294	1.99183	1	0.950229	0.842717	0.922461	1.02859	1.14436
SPCC1020.07	1	1.12448	1.06372	1.07715	1.21445	1.44882	1	0.985235	1.59785	1.58796	1.46674	1.78114
SPCC1020.08	1	0.523245	0.440214	0.39641	0.653901	0.863265	1	0.922111	1.32792	0.698549	0.825478	0.905657
SPCC1020.10	1	5.69084	6.6446	3.17607	3.19935	1.79197	1	1.06102	1.03016	1.57122	0.793093	0.916047
SPCC1183.02	1	1.12385	0.920608	0.910788	0.857847	0.744274	1	1.27472	1.03021	1.15544	1.07145	1.21217
SPCC1183.07	1	0.531729	0.395077	0.36655	0.484707	0.748979	1	1.06559	0.955918	0.950389	0.956575	0.877585
SPCC1183.08c	1	1.25911	0.842447	0.631231	0.694002	0.581597	1	1.00892	1.0146	0.914928	0.988765	0.859476
SPCC1183.11	1	2.88131	2.9522	2.40789	1.4645	1.14471	1	0.994151	1.60065	1.7152	0.976719	0.966977
SPCC11E10.07c	1	0.934887	1.16017	0.966457	0.994128	0.90489	1	0.567767	0.626178	0.624655	0.719001	0.884869
SPCC1223.05c	1	1.50536	0.722856	0.639959	0.63984	0.526705	1	0.691848	0.728165	0.917697	0.592553	0.690992
SPCC1223.06	1	0.950614	0.662193	0.623845	0.607183	0.684298	1	0.76682	0.933295	0.608379	0.639412	0.822337
SPCC1223.07c	1	1.22978	1.32428	0.685097	0.919536	1.35364	1	1.0468	1.02772	0.993343	1.0018	1.04922
SPCC1223.08c	1	0.95602	1.00219	0.512376	0.87452	1.26499	1	1.05856	1.03083	1.08432	1.14739	1.09555
SPCC1223.09	1	1.17467	1.24728	2.22256	2.94778	1.76826	1	1.34373	0.87852	1.27754	1.8768	1.93395
SPCC1223.11	1	0.577973	0.31896	0.443044	0.576119	0.895382	1	1.42547	0.927363	1.0667	1.14382	0.683756
SPCC1223.14	1	1.01289	0.557645	0.326567	0.555549	0.641776	1	0.875926	0.847923	1.02619	0.846455	0.867668
SPCC1235.05c	1	0.97268	1.15284	0.696365	0.838264	1.03384	1	0.68217	0.640654	0.639881	0.575651	0.670151
SPCC1235.06	1	1.10353	1.19797	2.01473	1.6749	1.10749	1	1.00088	0.980398	1.12186	1.17698	0.966977
SPCC1235.11	1	0.848297	0.868729	0.494206	0.65097	0.607802	1	1.10053	1.08913	1.17354	1.23089	0.930731
SPCC1235.14	1	1.03229	0.836194	0.340044	0.968705	1.50226	1	1.02194	0.921242	0.765222	1.00352	1.08679
SPCC1235.15	1	1.38023	2.88334	2.93899	1.75641	1.25695	1	1.11434	1.39104	1.24308	1.42659	1.19739
SPCC126.03	1	0.655622	0.338326	0.366831	0.615323	0.835656	1	0.838465	0.975511	0.796602	0.796062	0.771381
SPCC126.06	1	1.10316	1.90322	2.51248	1.78354	1.32728	1	0.920652	0.991969	0.980465	0.964112	1.11916
SPCC126.10	1	0.750807	0.847925	0.817765	0.855818	1.13161	1	0.836531	0.765745	0.854047	0.883475	0.798455
SPCC126.11c	1	1.03645	0.568663	0.678494	0.775549	0.661923	1	0.651238	1.03253	0.995094	0.930054	0.986754
SPCC126.12	1	0.817839	0.838255	0.628563	1.08725	1.09515	1	0.915334	1.00458	0.960108	0.911414	0.756622
SPCC126.15c	1	0.932496	0.830051	0.934207	1.00506	0.866433	1	0.851195	0.86933	1.02257	0.979338	0.71147
SPCC1281.03c	1	1.49433	0.892597	0.617071	1.37095	0.876209	1	1.19766	0.907221	0.891055	0.714885	0.8632
SPCC1281.05	1	1.41455	1.0831	1.48158	0.98866	1.18909	1	1.25221	1.06523	1.0343	0.797487	0.911675
SPCC1281.06c	1	1.21209	1.2538	0.644163	1.15413	1.39438	1	1.35844	1.12332	1.0225	0.976689	0.833376
SPCC1281.07c	1	1.96025	2.13095	10.8076	4.28376	2.98634	1	1.88358	2.04464	3.02532	9.99703	11.263
SPCC132.04c	1	0.933486	0.719075	0.873268	2.18233	2.11622	1	1.28494	1.16718	1.21018	1.17766	1.38155
SPCC1322.04	1	2.00111	3.24016	3.78329	1.66048	1.51212	1	0.946875	0.981979	1.09428	1.07628	1.2086
SPCC1322.08	1	6.58288	17.3483	10.7636	2.28948	1.67744	1	0.903784	1.34648	1.935	2.0348	1.80443
SPCC1322.09	1	1.613	1.37029	1.67308	1.06886	1.06334	1	0.85775	0.806949	1.00516	0.975968	0.73113
SPCC1322.14c	1	0.711148	0.744091	0.885707	0.832272	0.819723	1	1.05449	0.954217	0.992716	0.92982	0.940829
SPCC1322.15	1	0.806216	0.349805	0.226744	0.485115	0.51767	1	0.93269	0.733145	1.30935	0.579194	1.00944
SPCC1322.16	1	1.20158	1.78194	1.86212	1.36319	1.39903	1	1.62224	1.66025	1.30935	1.93456	2.04834
SPCC1393.02c	1	1.15265	1.39759	1.04365	1.05519	1.49634	1	0.844241	0.733145	1.24904	1.011	0.59215
SPCC1393.03	1	1.36214	0.768577	0.45856	0.643167	0.577227	1	0.521077	0.706476	1.07654	0.8136	1.37832
SPCC1393.06c	1	0.584101	0.631034	0.577522	0.686056	0.979214	1	0.814554	0.765745	1.36648	1.09059	1.05927
SPCC1393.13	1	1.13392	0.680078	1.08	1.45637	1.16829	1	0.925571	0.801159	0.843989	0.804845	0.906099
SPCC13B11.01	1	1.09361	0.864508	0.620726	0.994742	1.02144	1	1.14479	1.11136	1.12557	1.09008	1.1666
SPCC1442.05c	1	1.74233	2.35509	2.19179	1.28507	0.886176	1	0.917678	1.13578	1.26676	1.05216	1.05927
SPCC1442.06	1	0.882495	1.26963	2.12142	1.50612	1.12487	1	1.48284	1.2986	1.2902	1.62066	1.17886
SPCC1442.09	1	1.10524	1.12211	0.661801	1.00085	1.10362	1	1.27519	1.24627	1.17018	1.30902	1.29734
SPCC1442.10c	1	0.976852	0.843883	0.998556	0.964971	0.884437	1	1.05133	0.825127	0.888043	0.819103	0.848095
SPCC1442.14c	1	1.34998	2.07756	1.59644	1.74517	1.35783	1	1.02243	0.791887	1.14146	1.2706	1.17668
SPCC1442.16c	1	1.53429	2.48073	3.46313	4.12028	2.8	1	0.866595	1.08893	1.25121	1.00066	1.55822
SPCC1450.04	1	0.82022	0.53415	0.391907	0.566969	0.640845	1	0.814487	0.746505	0.794931	0.767661	0.699063
SPCC1450.06c	1	0.969483	0.785119	0.895558	0.994747	0.949753	1	1.19394	1.37159	1.0343	1.40088	1.05927
[truncated: 270 more rows]

## Sheet: Diamide
	nnls.ks	nnls.kd	nnls.lin.err	nnls.err
[truncated: 530 more rows]

## Sheet: SodiumChloride
	nnls.ks	nnls.kd	nnls.lin.err	nnls.err
[truncated: 683 more rows]

[truncated: 4 more sheets: Rapamycin, Spombe, Associations, FDR]
