# Supplementary material for: One third of dynamic protein expression profiles can be predicted by a simple rate equation
Source: Royal Society of Chemistry journal article supplement (doi:10.1039/c4mb00358f), 2014-08-01
Supplement: c4mb00358f2.zip [file c4mb00358f2.zip]

SPAC1142.04

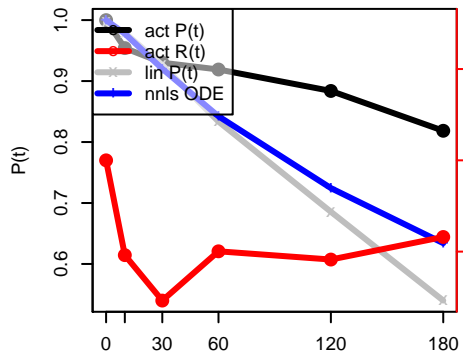

Time (min)  
ks = 0.00213883802932046 kd = 0.00385081766977747

SPAC12G12.04

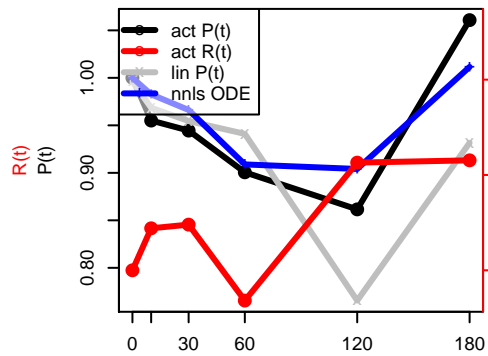

Time (min)  
ks = 0.00732223932896561 kd = 0.010087243851878

SPAC139.05

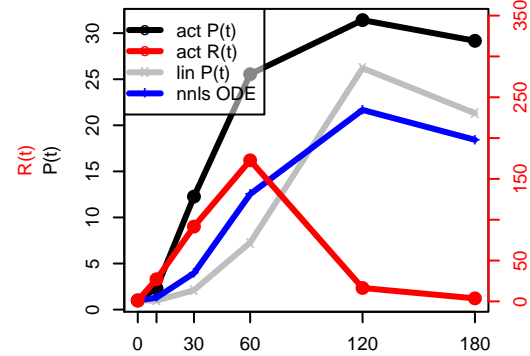

Time (min)  
ks = 0.00239588687819045 kd = 0.00385081766977747

SPAC13C5.04

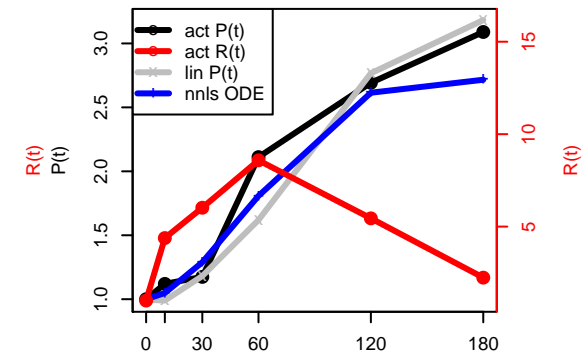

Time (min)  
ks = 0.00317494029086533 kd = 0.00385081766977747

SPAC17G6.06

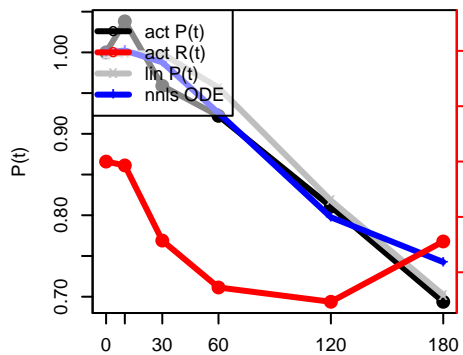

Time (min)  
ks = 0.00686130857980875 kd = 0.00655935113046183

SPAC17G8.08c

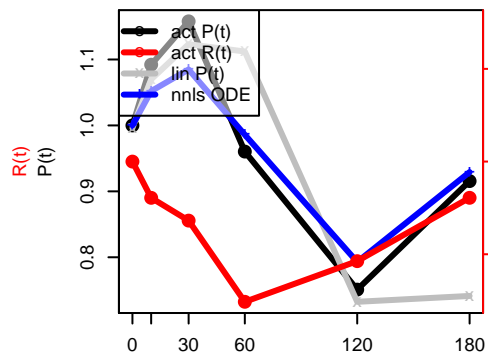

Time (min)  
ks = 0.0187005875853602 kd = 0.0113300255317588

SPAC1B3.16c

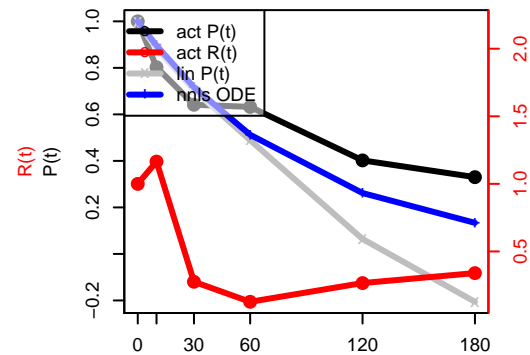

Time (min)  
ks = 0 kd = 0.0111956825185753

SPAC22G7.05

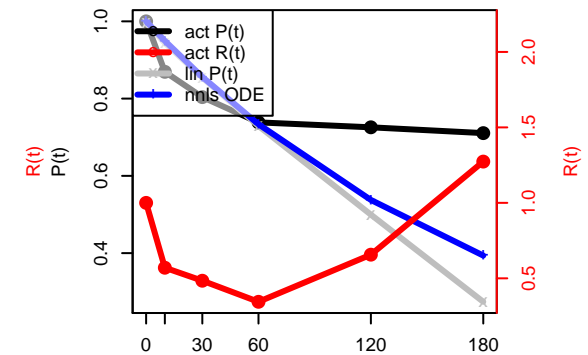

Time (min)  
ks = 0 kd = 0.00518235303888459

SPAC23H3.15c

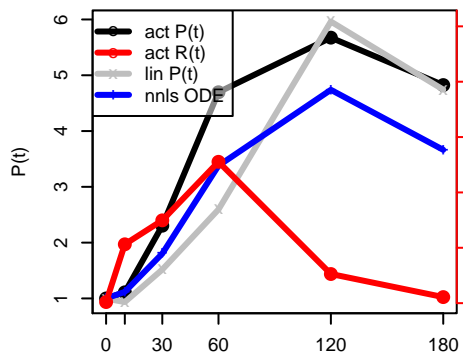

Time (min)  
ks = 0.000688989661242203 kd = 0.00677861444913969

SPAC24H6.04

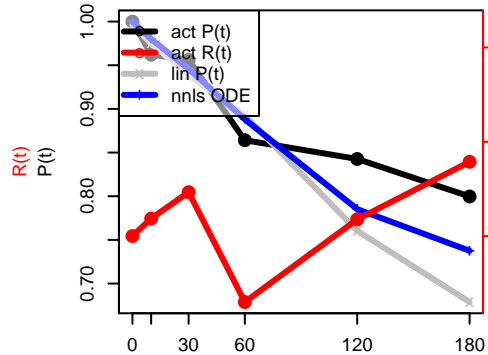

Time (min)  
ks = 0.00173345302937751 kd = 0.00385081766977747

SPAC30C2.02

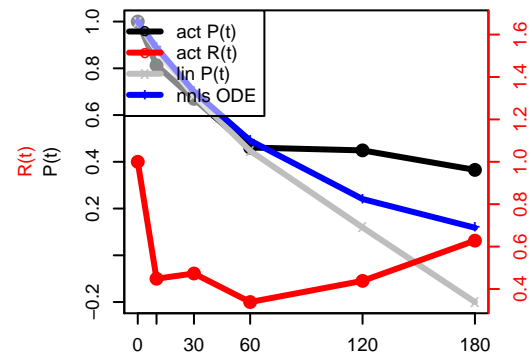

Time (min)  
ks = 0 kd = 0.0118505997264115

SPAC343.12

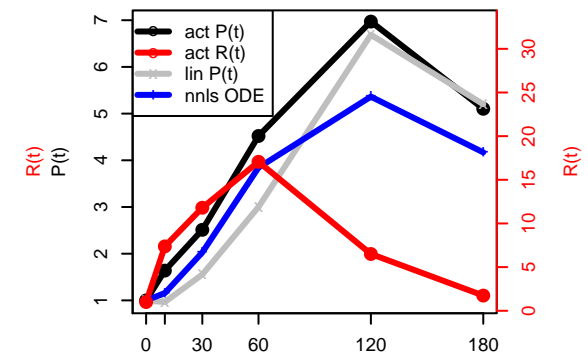

Time (min)  
ks = 0.00604050232865911 kd = 0.00919560687120421

SPAC3C7.14c

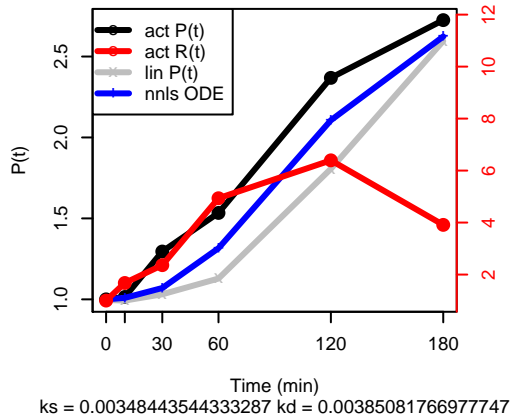

SPAC513.07

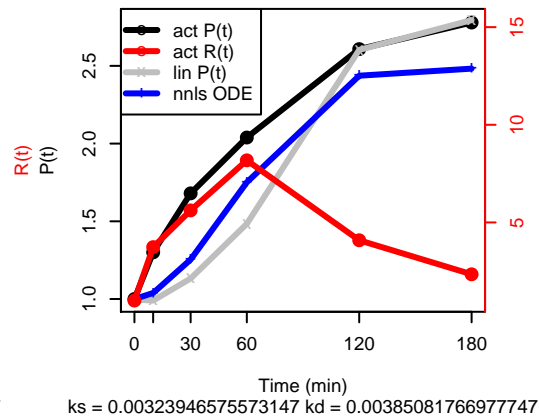

SPAC9E9.11

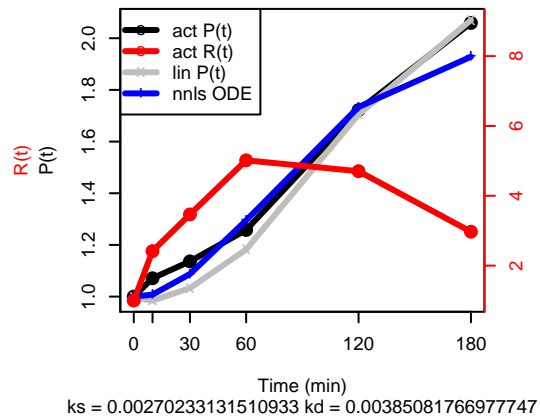

SPAC9E9.13

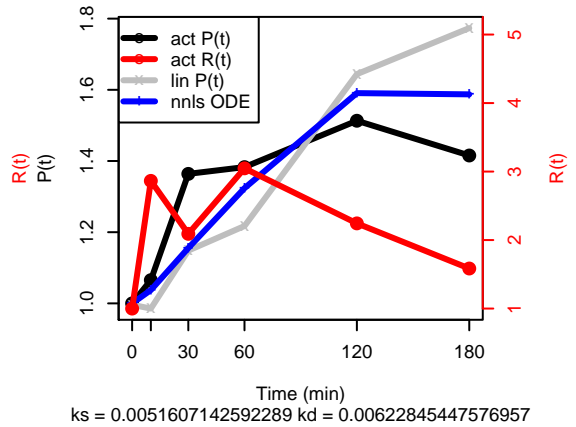

SPACUNK4.17

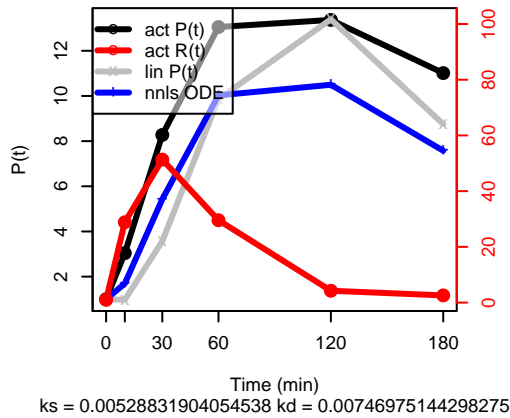

SPAPB1A10.10c

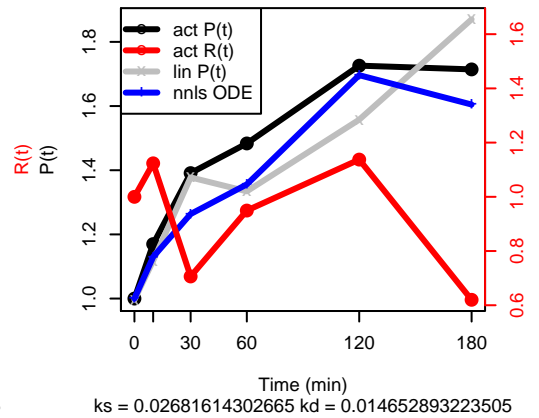

SPBC1604.06c

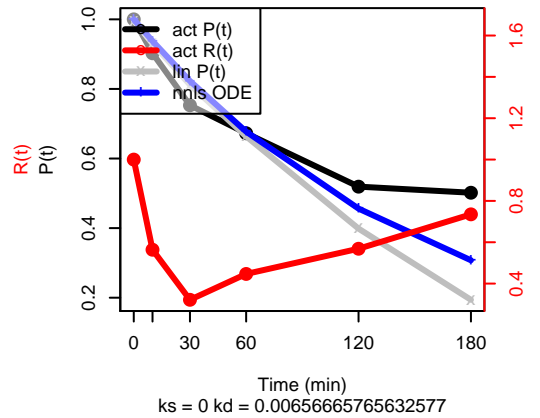

SPBC23G7.10c

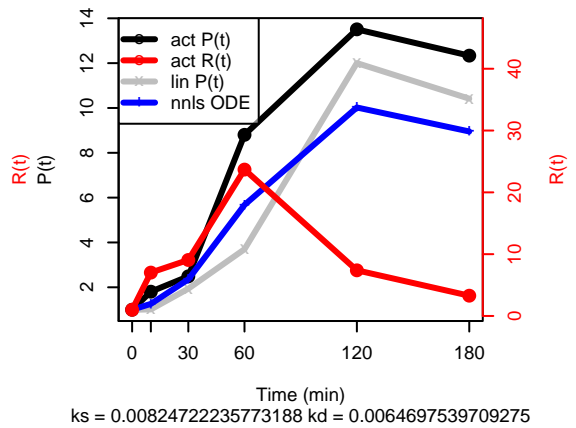

SPBC336.02

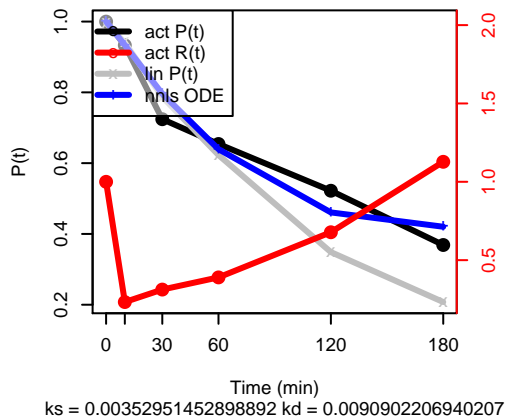

SPBC365.12c

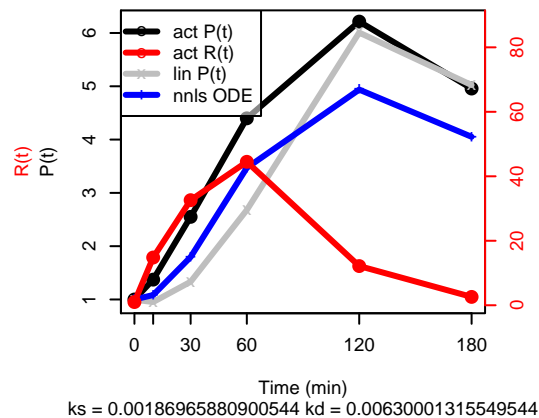

SPBC3B8.01c

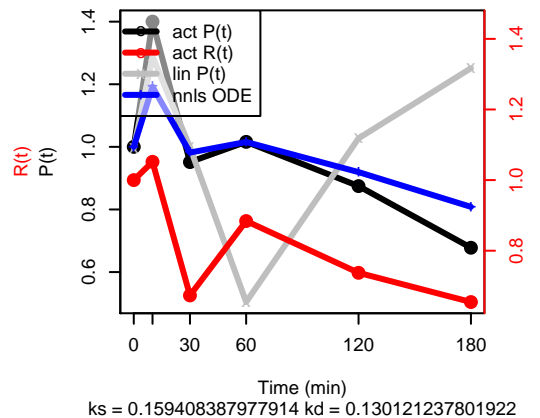

SPBC3E7.02c

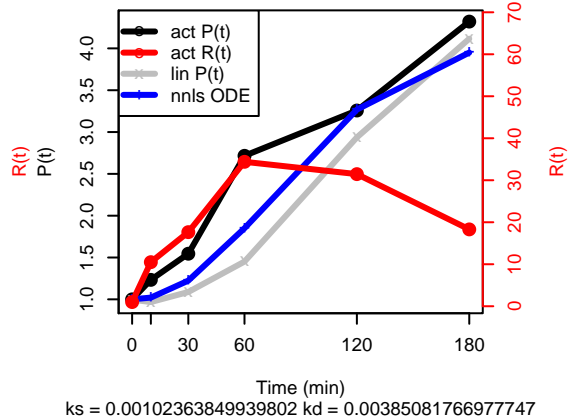

SPBC3F6.03

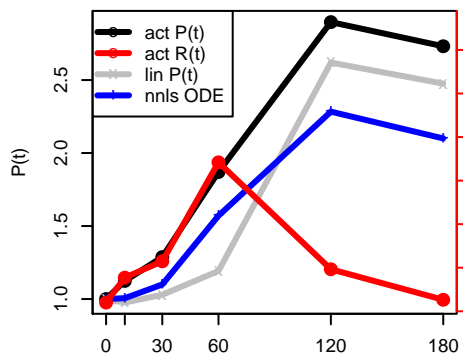

Time (min)  
ks = 0.00181276885463665 kd = 0.00385081766977747

SPBC409.13

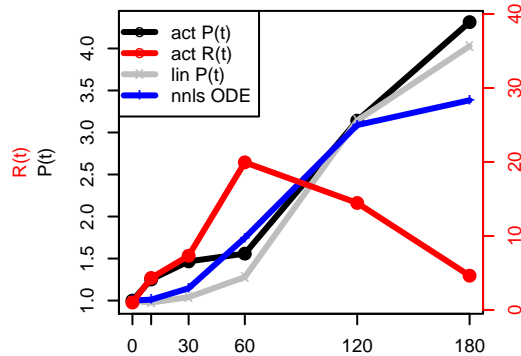

Time (min)  
ks = 0.00185688919119854 kd = 0.00385081766977747

SPBC4B4.08

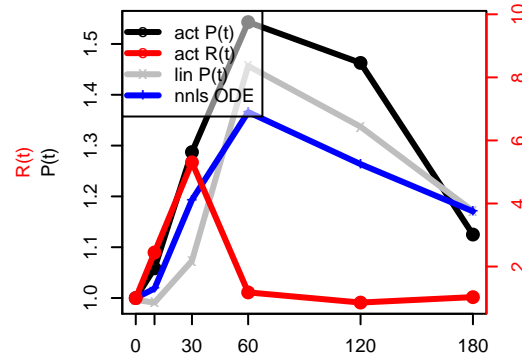

Time (min)  
ks = 0.00334433594559814 kd = 0.00385081766977747

SPBC4C3.05c

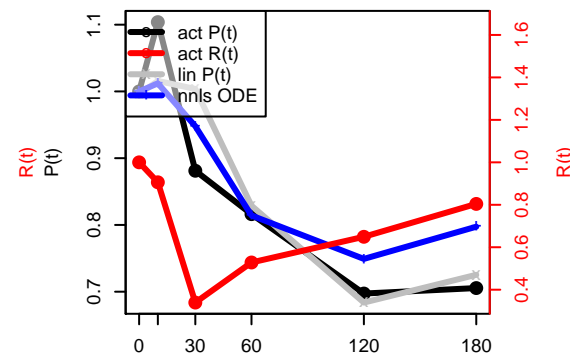

Time (min)  
ks = 0.0139372802940451 kd = 0.0119843030594053

SPBC530.05

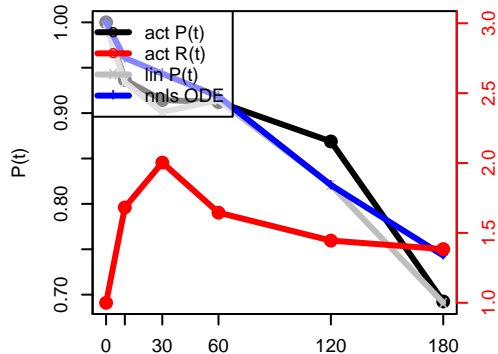

Time (min)  
ks = 0.00562982834380262 kd = 0.0118572316491067

SPBC725.03

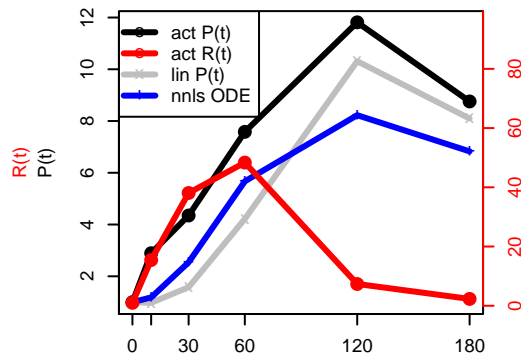

Time (min)  
ks = 0.00287126297167813 kd = 0.00491482444114802

SPBC725.14

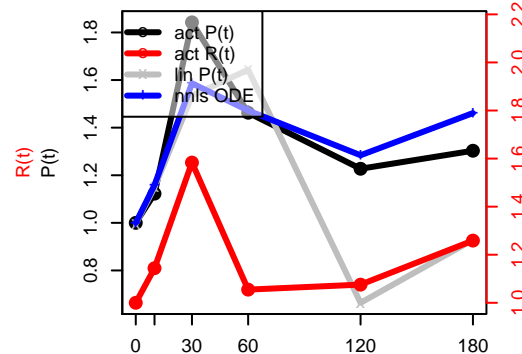

Time (min)  
ks = 0.0949802089485411 kd = 0.0796521812627137

SPCC1020.06c

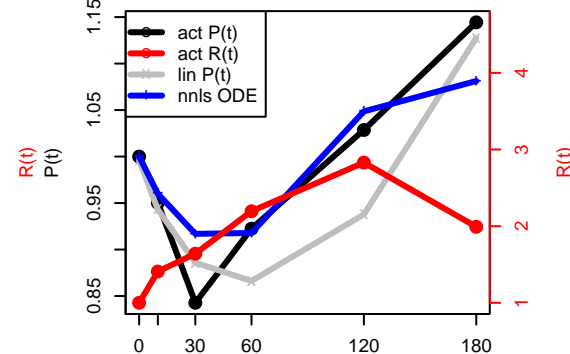

Time (min)  
ks = 0.00479364465414019 kd = 0.0101103365893837

SPCC1281.07c

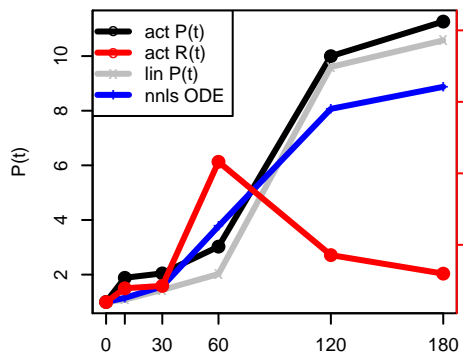

Time (min)  
ks = 0.0127692363418984 kd = 0.00385081766977747

SPCC1795.11

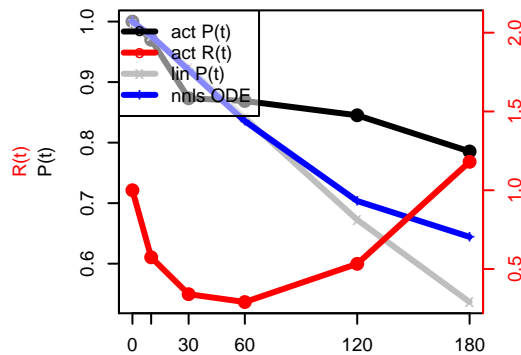

Time (min)  
ks = 0.00185724023791619 kd = 0.00385081766977747

SPCC63.14

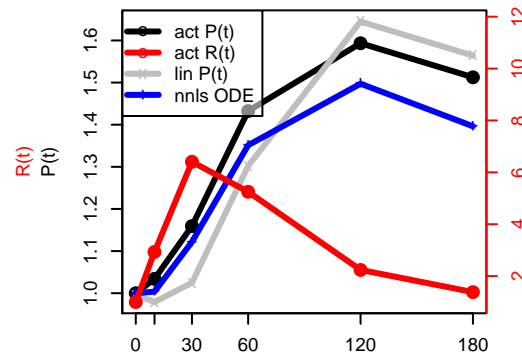

Time (min)  
ks = 0.00213886297631426 kd = 0.00385081766977747

SPCC663.08c

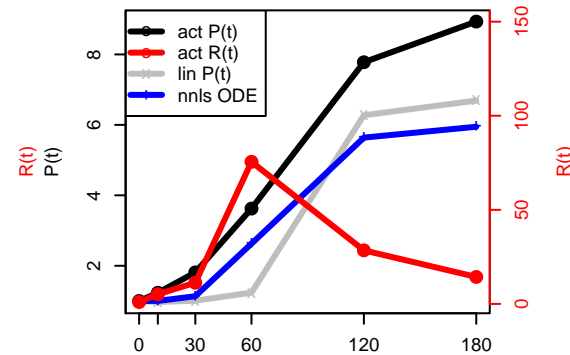

Time (min)  
ks = 0.00129598852750568 kd = 0.00385081766977747

SPCC965.06

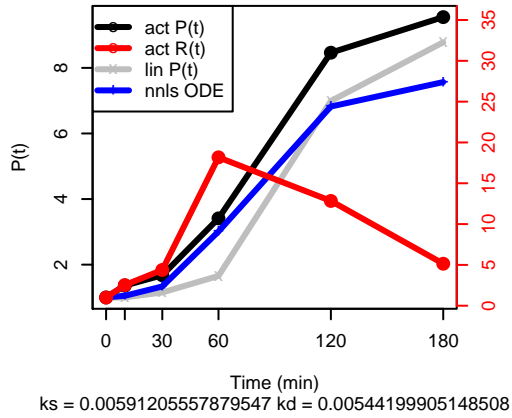

SPCC965.07c

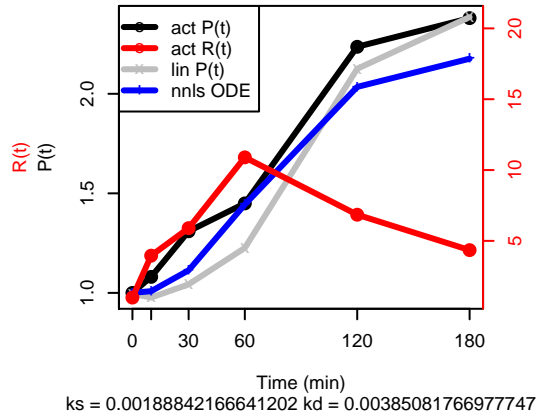

SPAC1002.07c

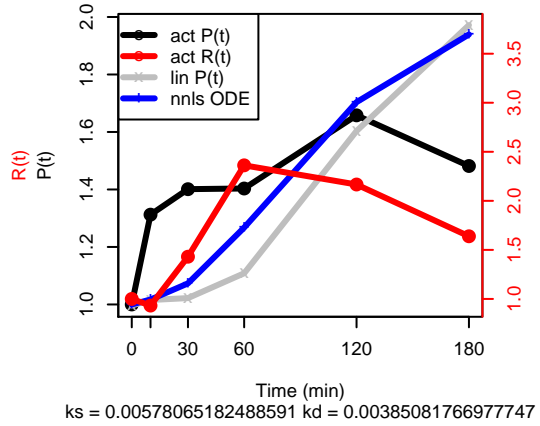

SPAC10F6.02c

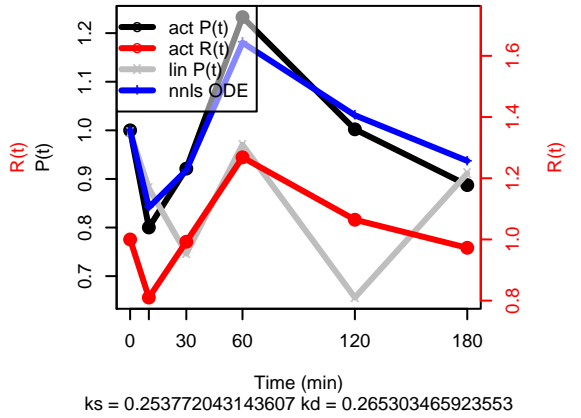

SPAC10F6.03c

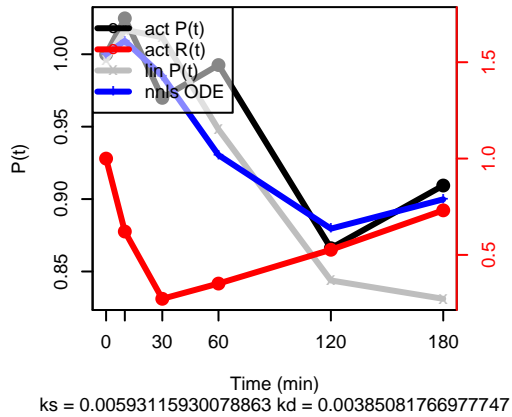

SPAC10F6.13c

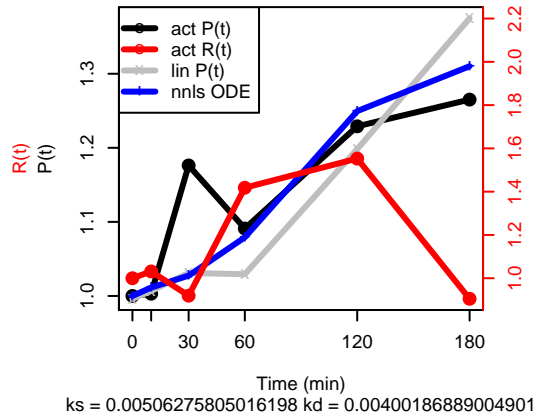

SPAC13A11.02c

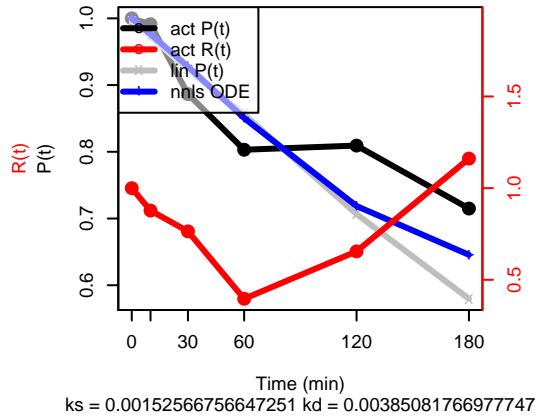

SPAC13G7.04c

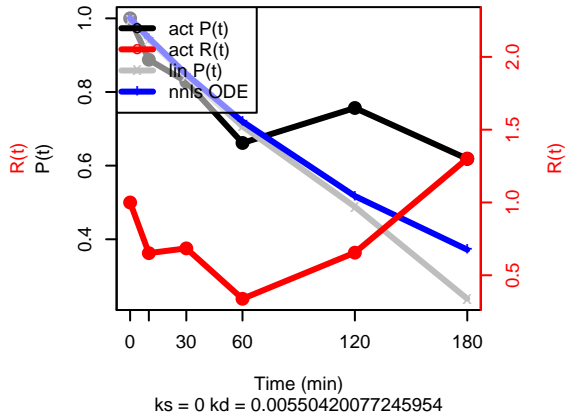

SPAC15A10.16

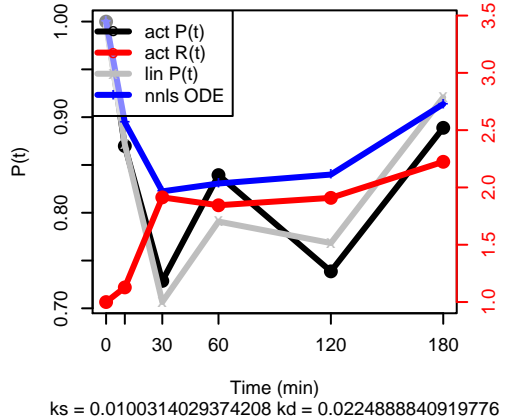

SPAC16.02c

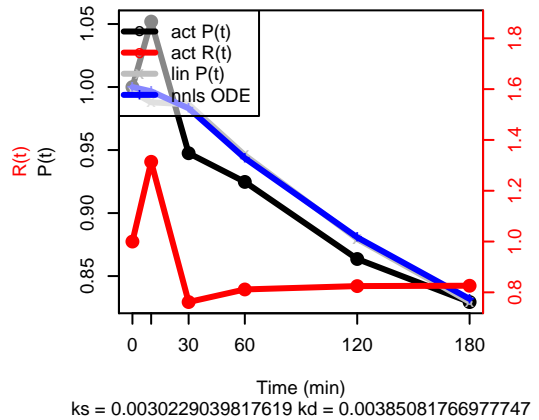

SPAC1687.11

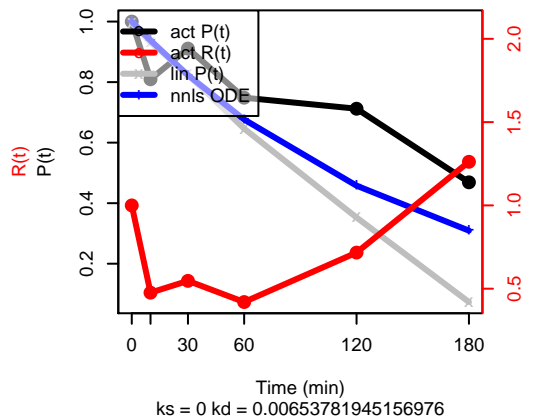

SPAC16C9.02c

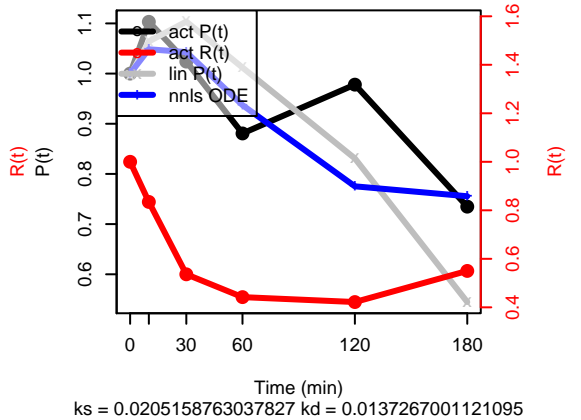

SPAC1782.06c

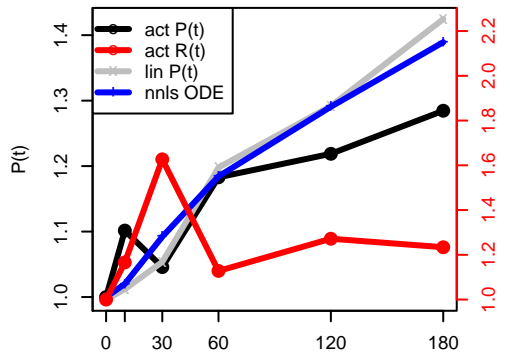

Time (min)  
ks = 0.00542829921585508 kd = 0.00385081766977747

SPAC1783.05

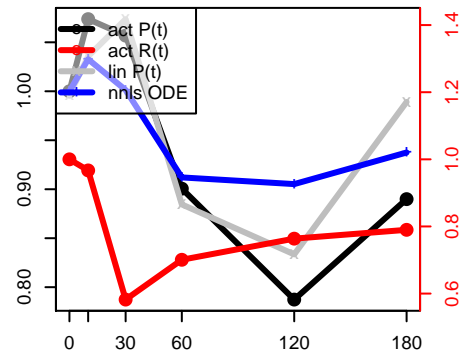

Time (min)  
ks = 0.0220936334655122 kd = 0.0181356614715532

SPAC1786.02

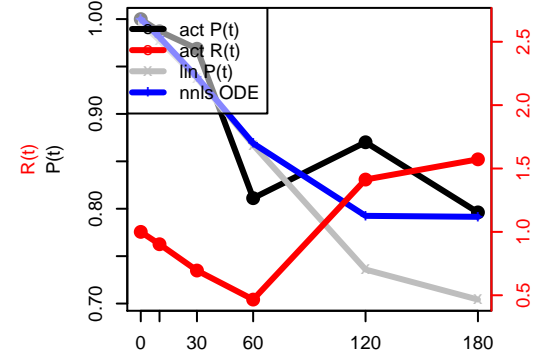

Time (min)  
ks = 0.00199813191937757 kd = 0.00385081766977747

SPAC17A2.05

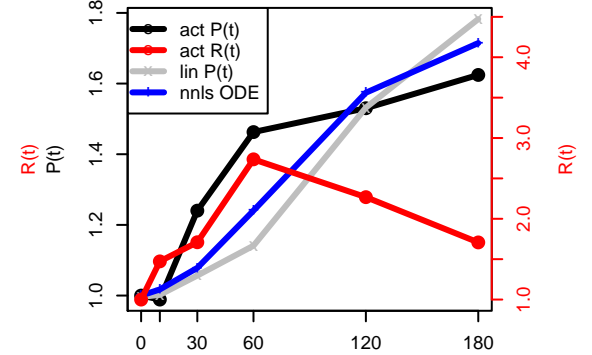

Time (min)  
ks = 0.00443916452326803 kd = 0.00385081766977747

SPAC17G8.06c

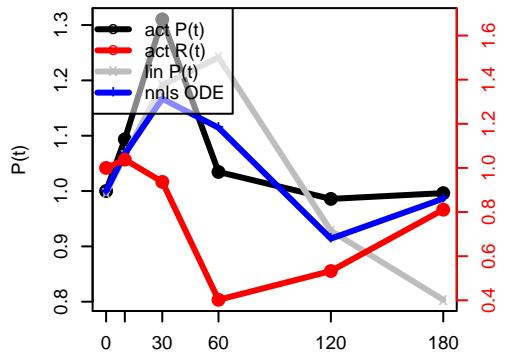

Time (min)  
ks = 0.0193871865484936 kd = 0.0125861596263953

SPAC17H9.05

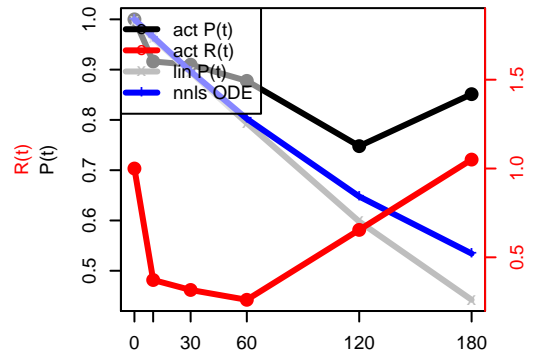

Time (min)  
ks = 0.000438153177451805 kd = 0.00385081766977747

SPAC17H9.12c

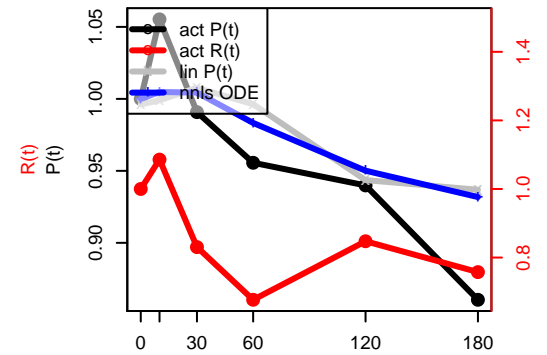

Time (min)  
ks = 0.0041389276179392 kd = 0.00385081766977747

SPAC1834.02

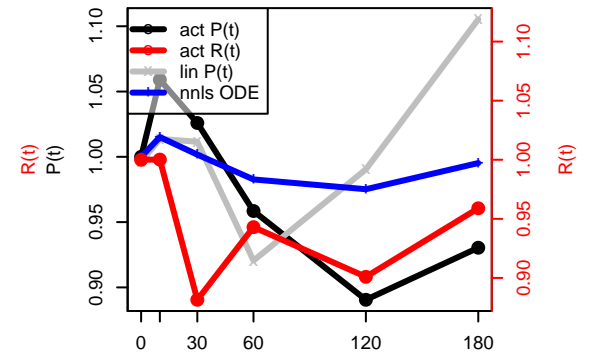

Time (min)  
ks = 0.0334934667779547 kd = 0.0317355474948985

SPAC1834.03c

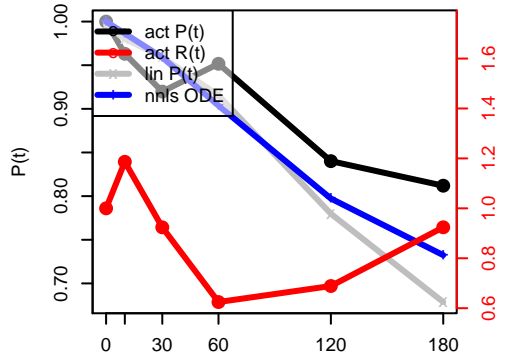

Time (min)  
ks = 0.00224901912875519 kd = 0.00385081766977747

SPAC19G12.09

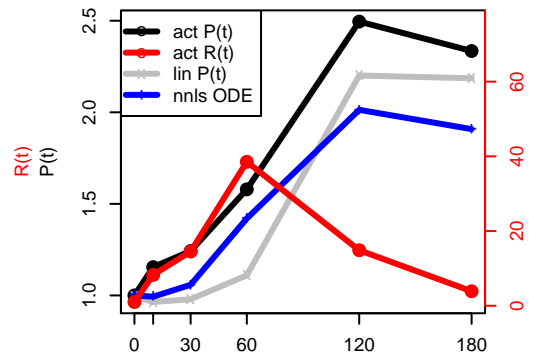

Time (min)  
ks = 0.000629610941629384 kd = 0.00385081766977747

SPAC19G12.10c

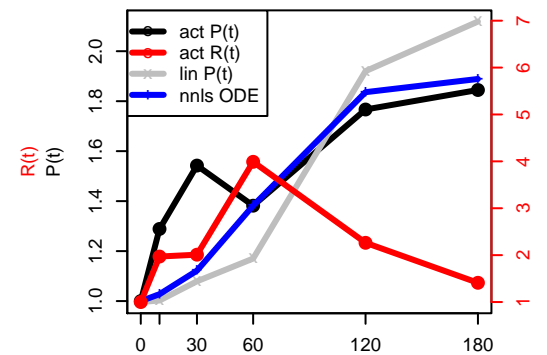

Time (min)  
ks = 0.00446614870136258 kd = 0.00385081766977747

SPAC1B3.12c

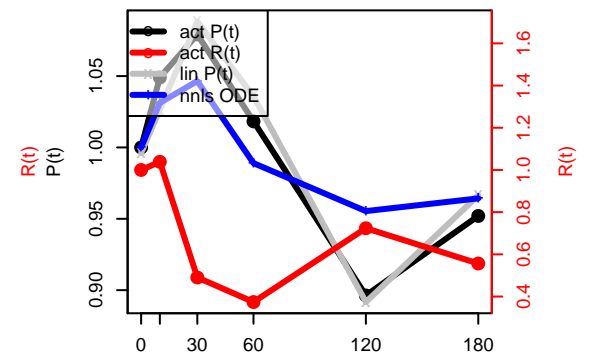

Time (min)  
ks = 0.00851397691537818 kd = 0.00548566557924879

SPAC1F3.09

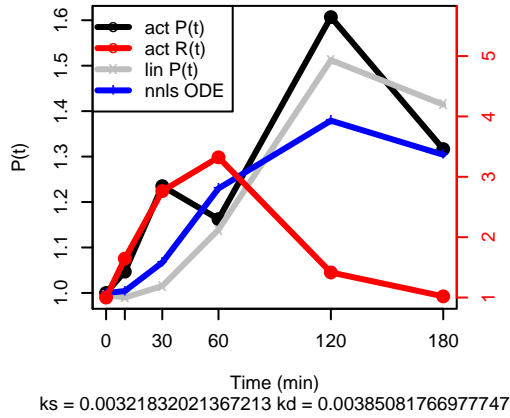

SPAC1F8.07c

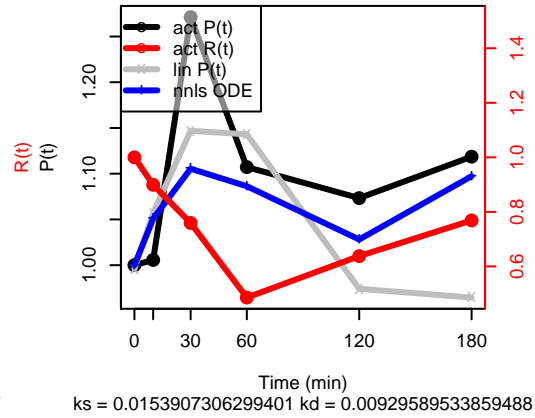

SPAC20G8.04c

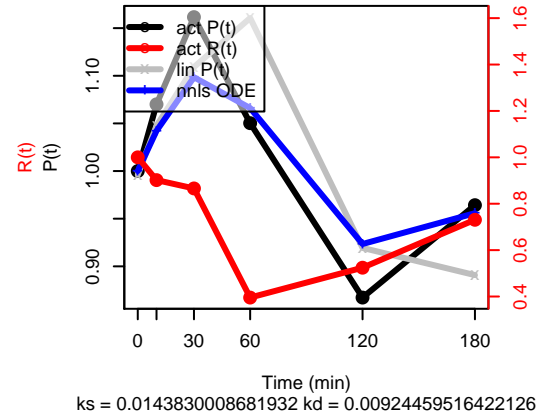

SPAC222.06

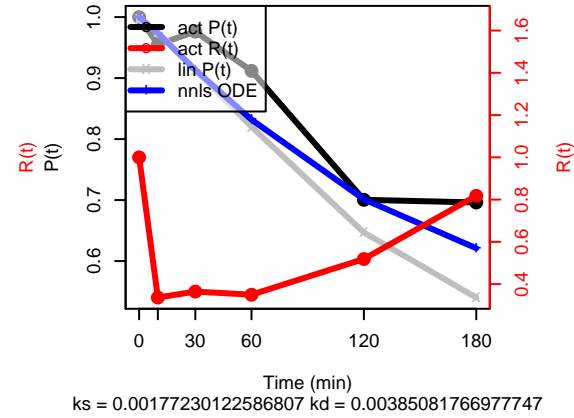

SPAC227.10

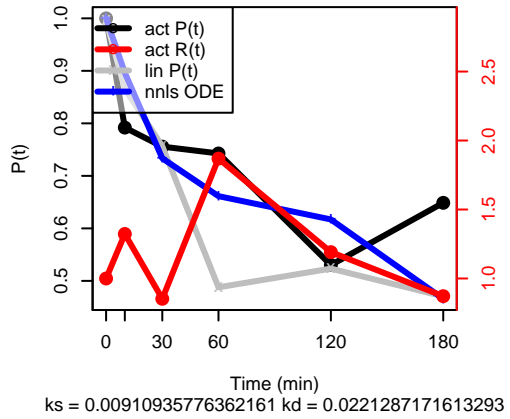

SPAC22F3.06c

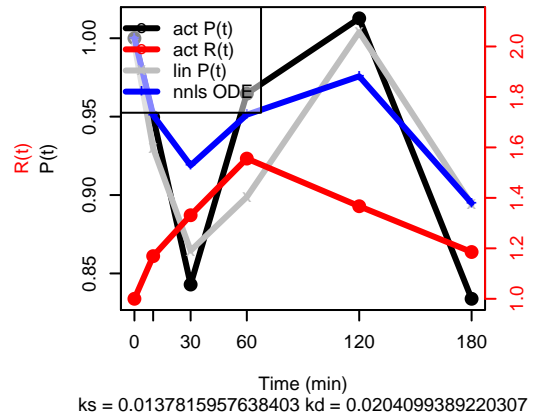

SPAC22F8.09

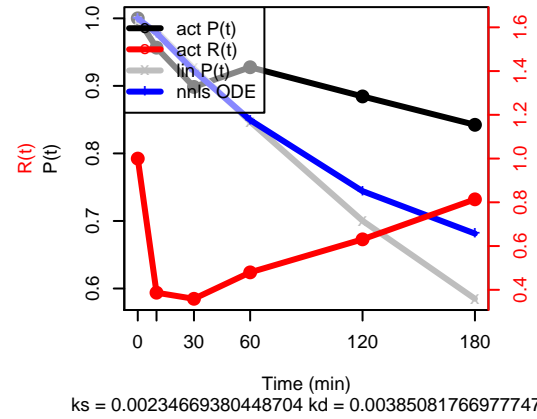

SPAC22H12.04c

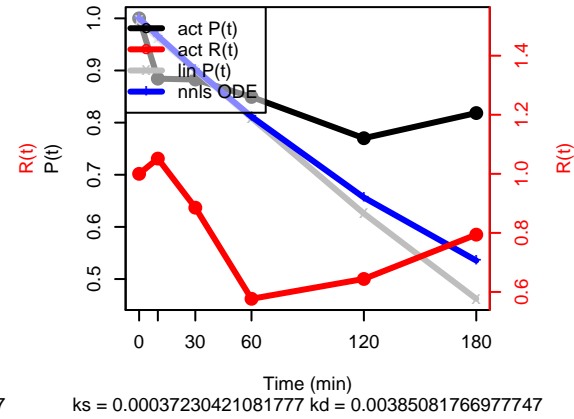

SPAC23G3.03

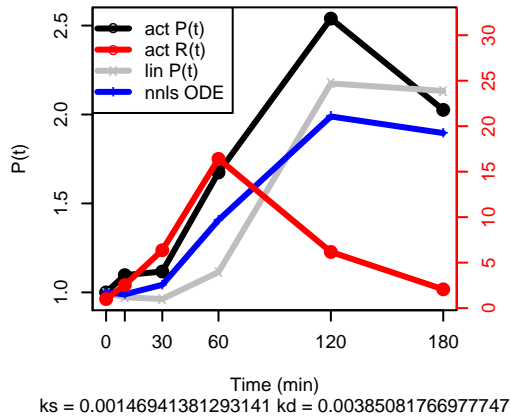

SPAC23H4.09

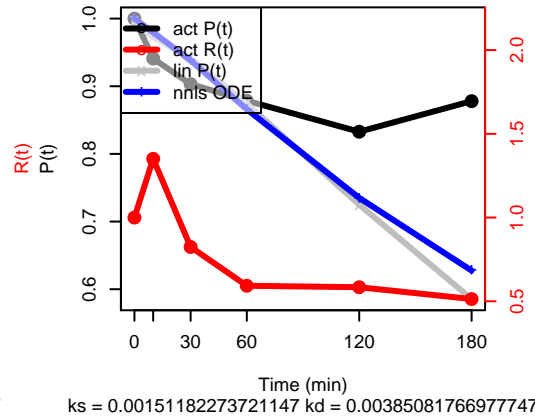

SPAC24B11.06c

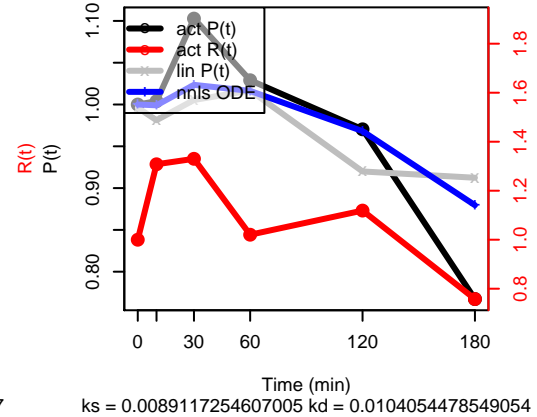

SPAC24B11.09

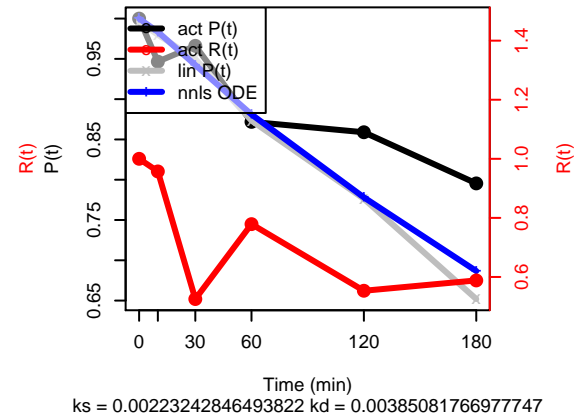

SPAC25G10.09c

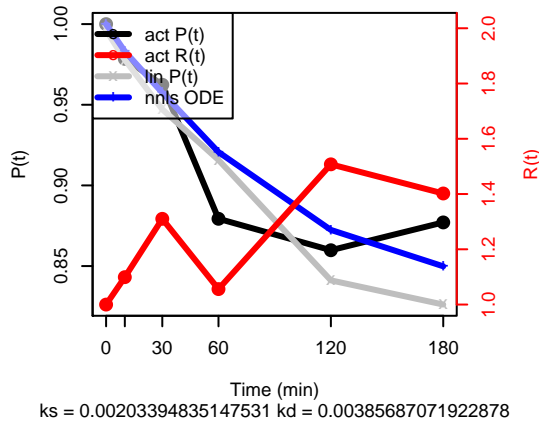

SPAC26A3.12c

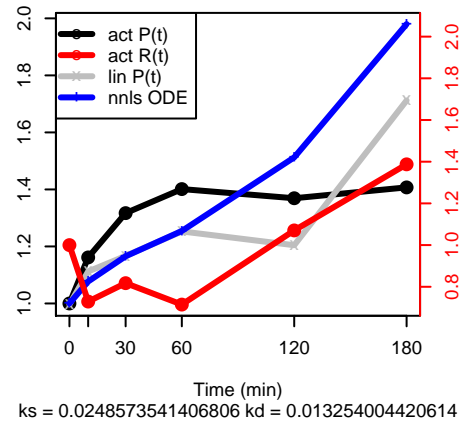

SPAC26F1.04c

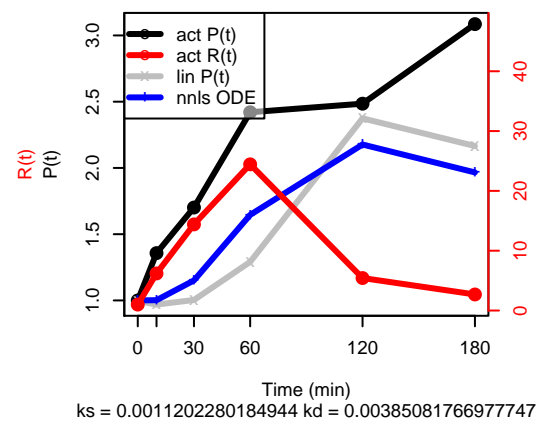

SPAC26F1.07

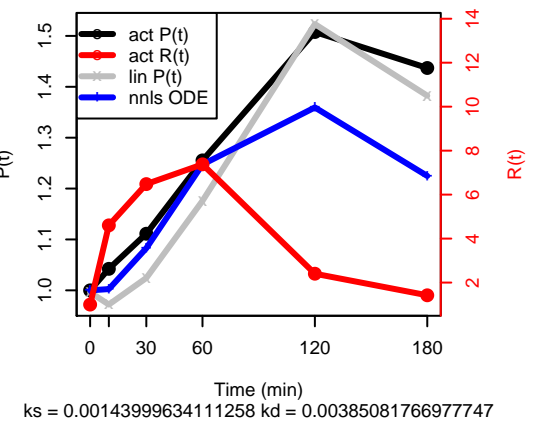

SPAC26H5.09c

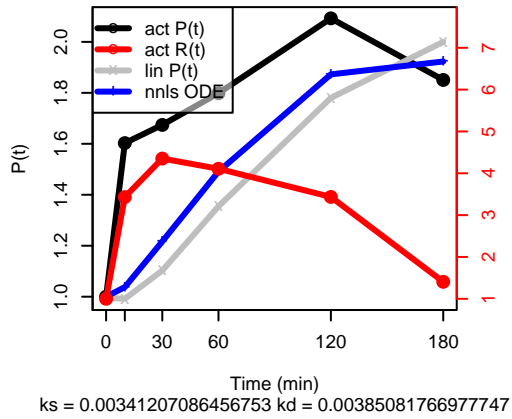

SPAC27F1.02c

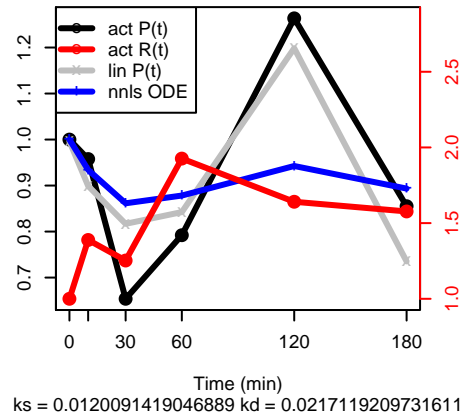

SPAC29A4.20

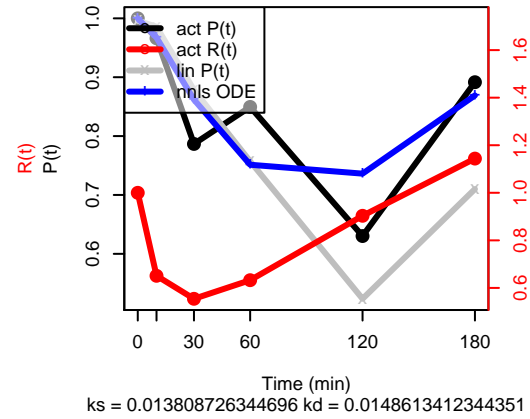

SPAC2F3.05c

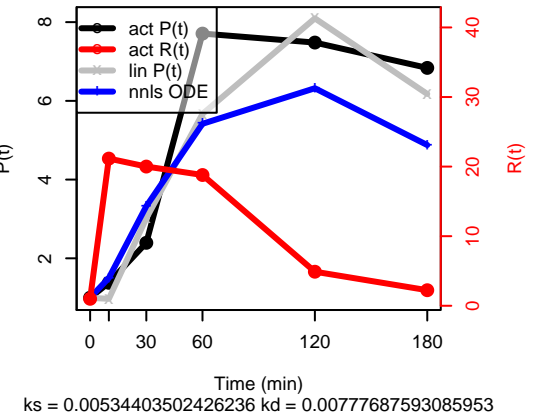

SPAC2F3.16

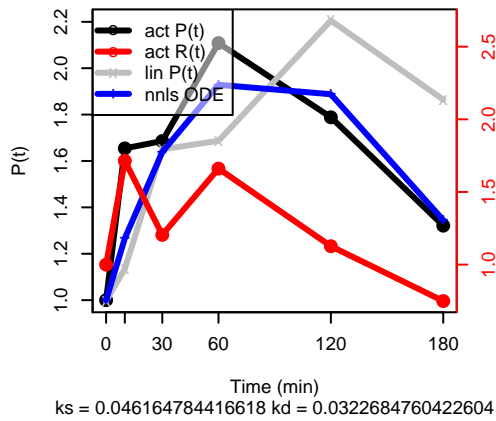

SPAC30C2.04

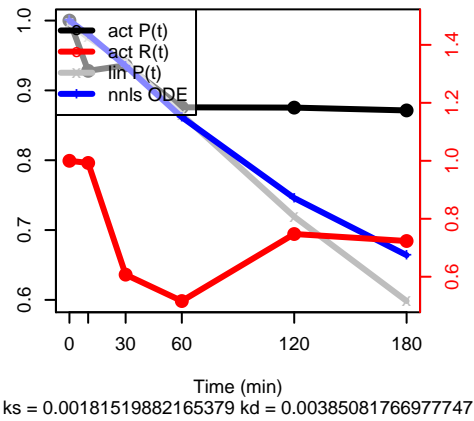

SPAC343.04c

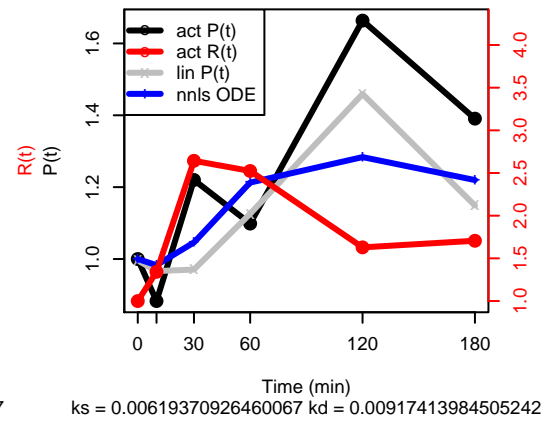

SPAC3A12.18

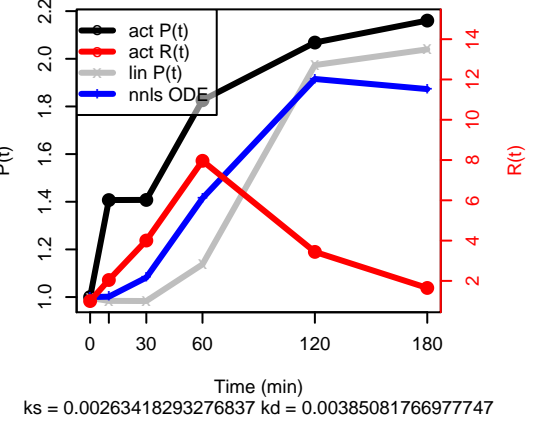



SPAC3C7.08c

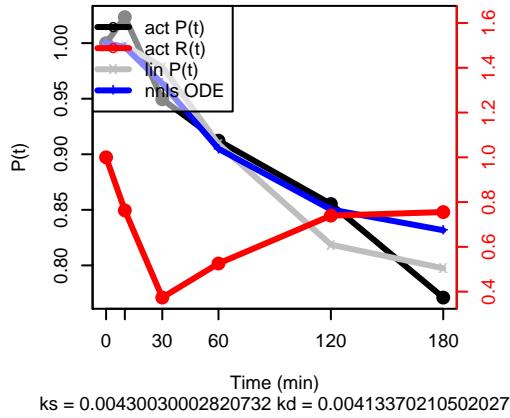

SPAC3F10.17

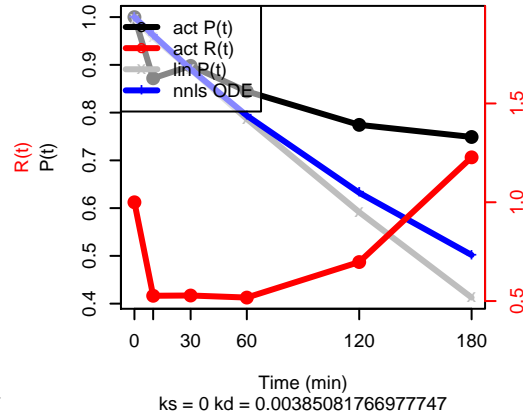

SPAC3H5.06c

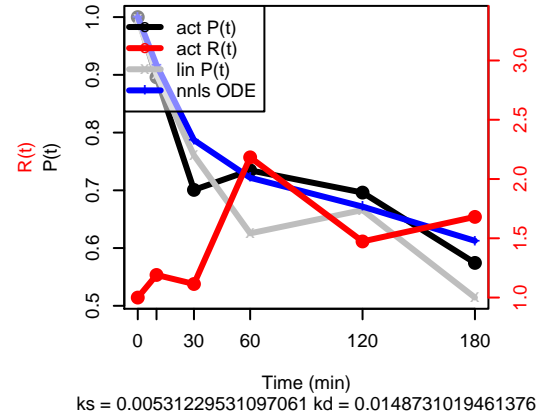

SPAC4A8.11c

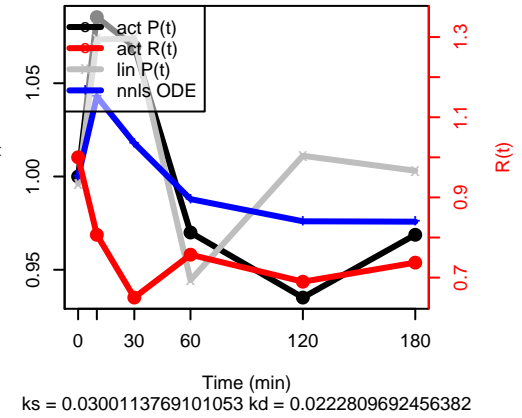

SPAC4F10.10c

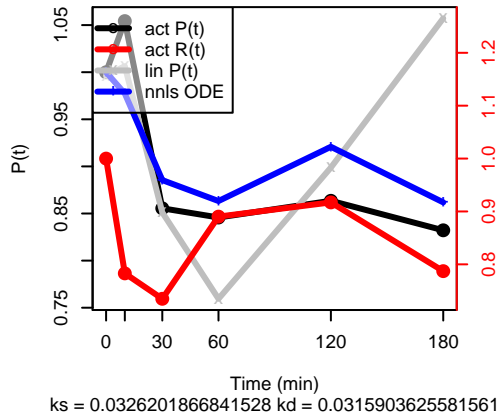

SPAC4F10.13c

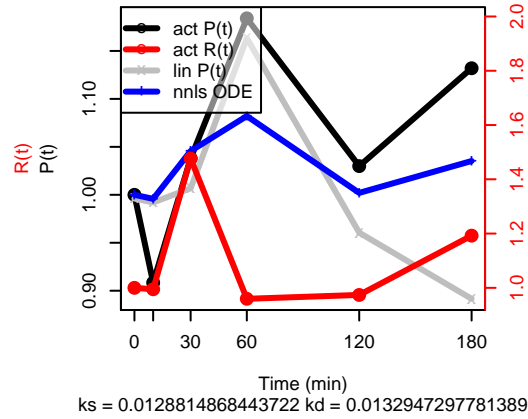

SPAC4F8.14c

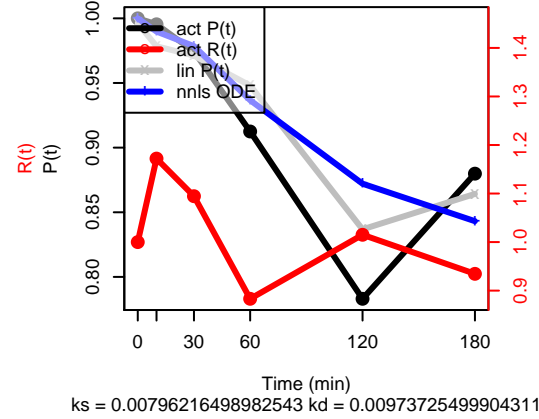

SPAC4G9.17c

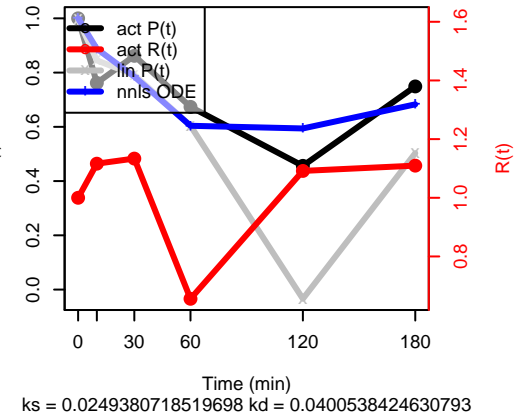

SPAC513.05

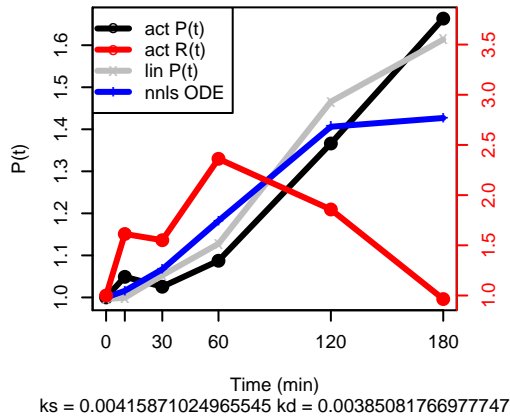

SPAC56E4.03

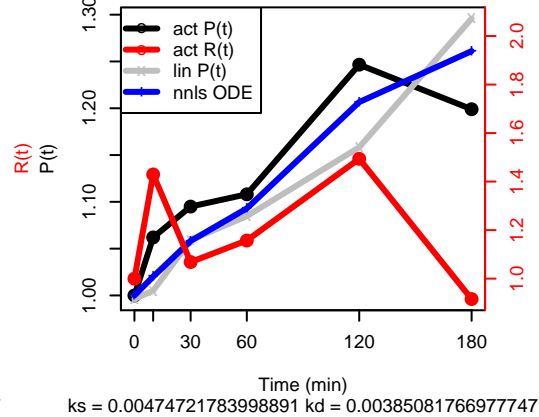

SPAC57A10.10c

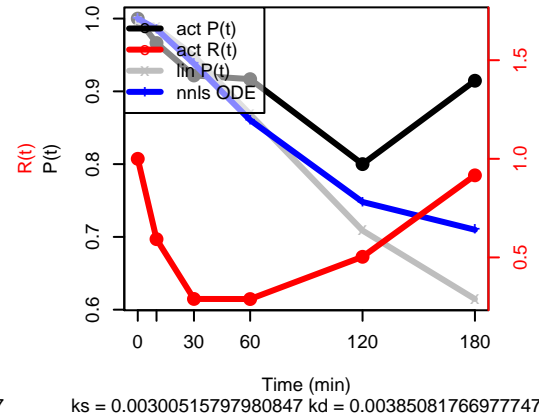

SPAC6B12.04c

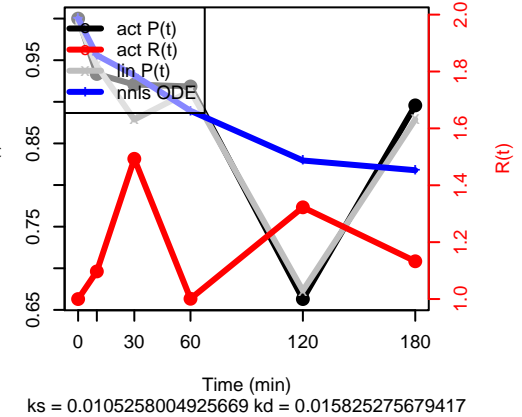



SPAC6F6.10c

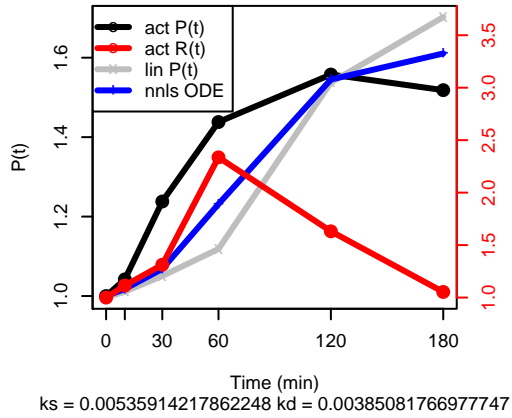

SPAC6G10.07

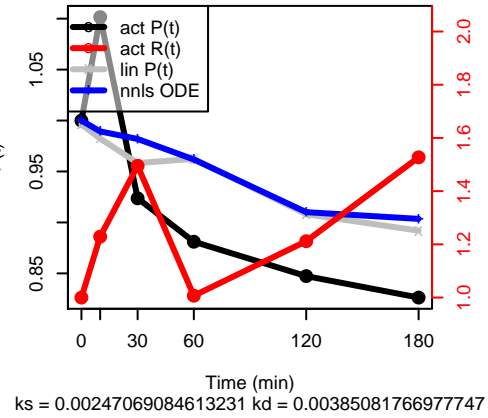

SPAC824.07

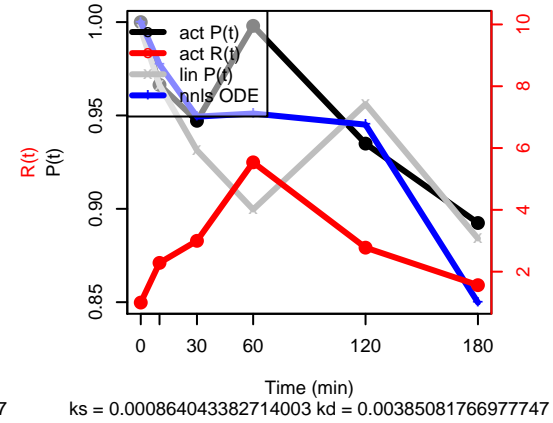

SPAC890.06

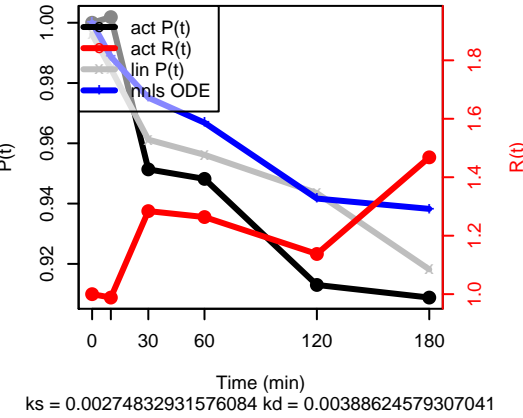

SPAC8F11.09c

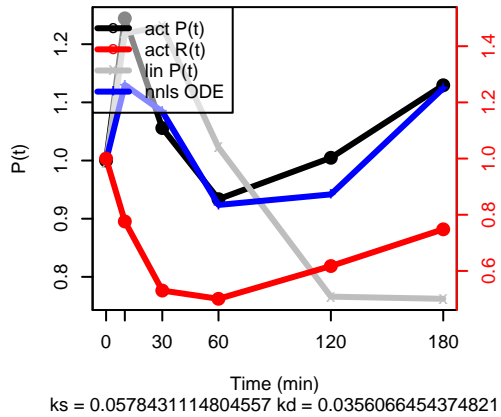

SPAP32A8.02

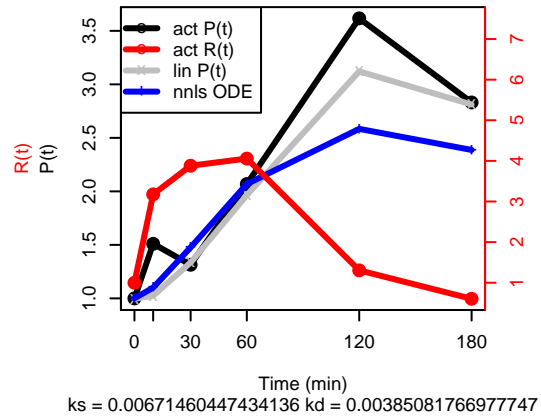

SPAPB1A10.13

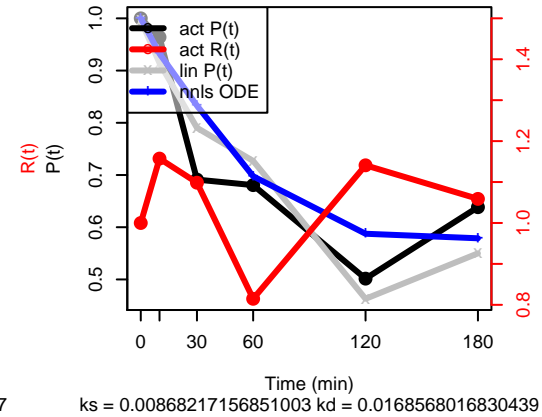

SPAPB24D3.08c

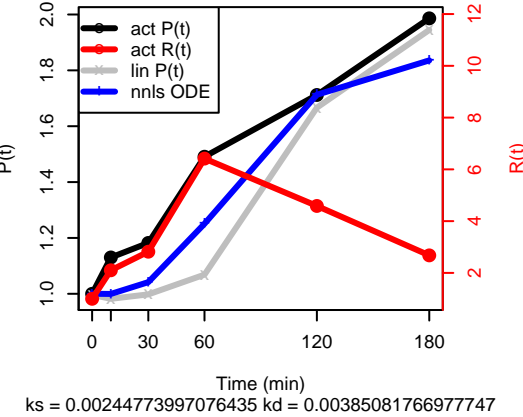

SPAPB2B4.04c

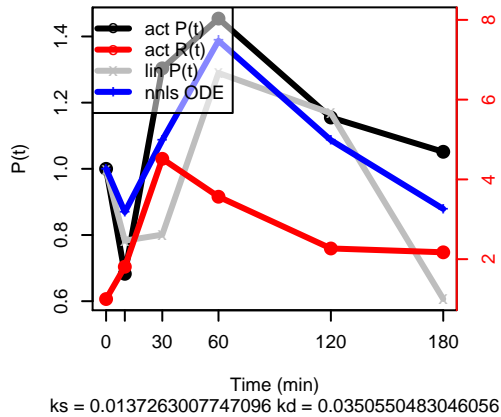

SPAPB2B4.07

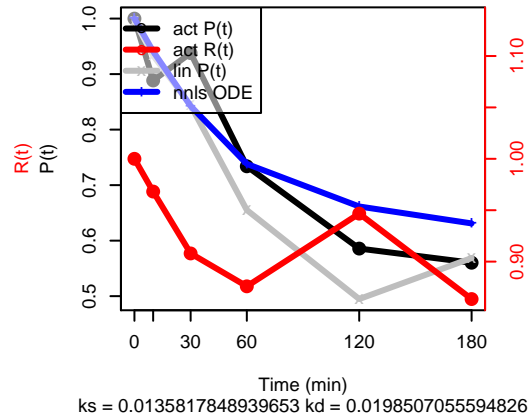

SPAPB8E5.07c

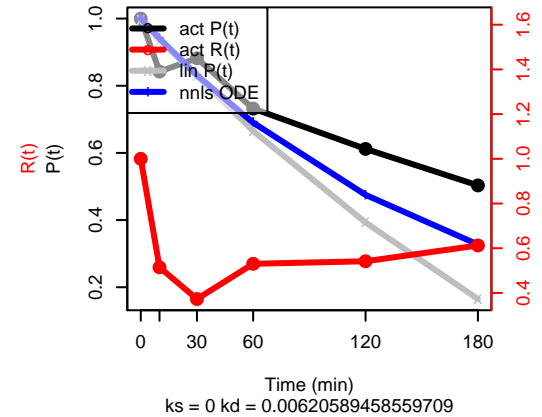

SPAPJ698.03c

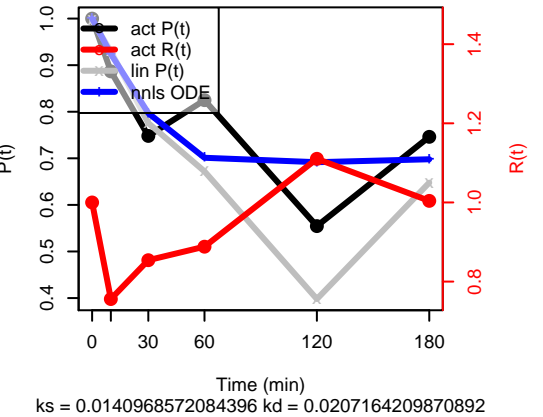

SPBC119.01

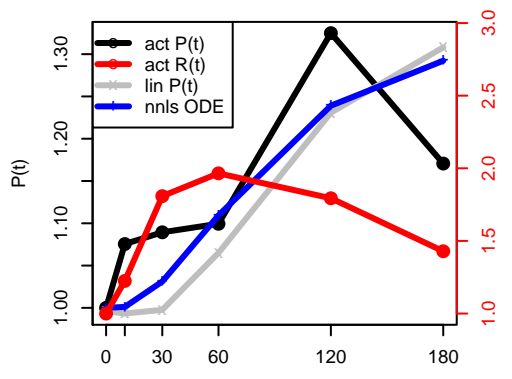

Time (min)  
ks = 0.00356079866442771 kd = 0.00385081766977747

SPBC11B10.02c

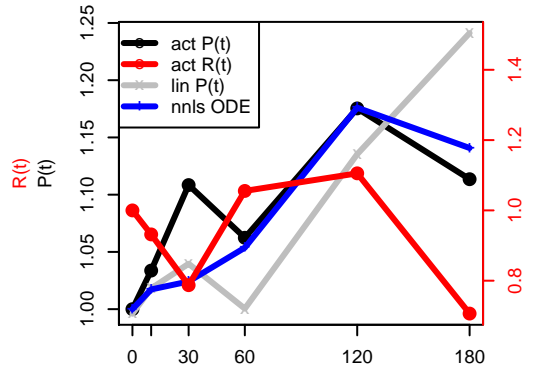

Time (min)  
ks = 0.0116342806571281 kd = 0.00944204957191496

SPBC11C11.06c

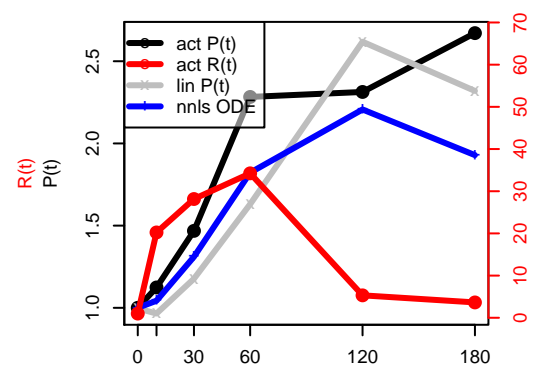

Time (min)  
ks = 0.000737669194107228 kd = 0.00385081766977747

SPBC1289.05c

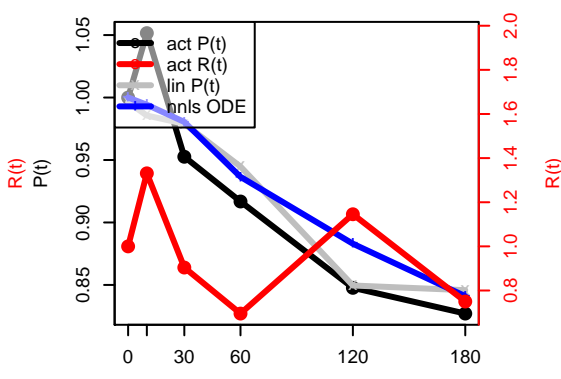

Time (min)  
ks = 0.00279472839421419 kd = 0.00385081766977747

SPBC1289.06c

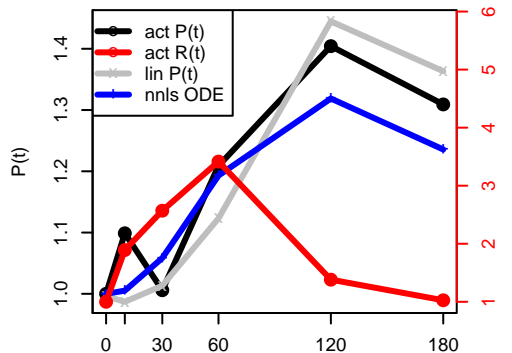

Time (min)  
ks = 0.00293237888147438 kd = 0.00385081766977747

SPBC13A2.04c

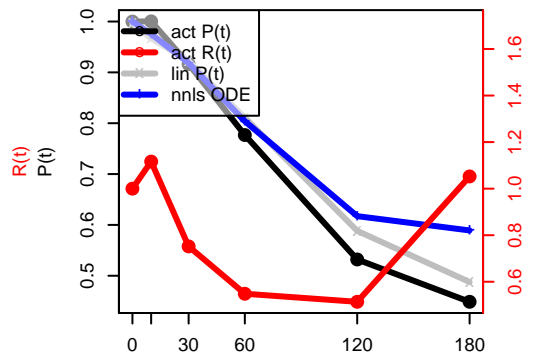

Time (min)  
ks = 0.00624341379153772 kd = 0.00918282133215995

SPBC14F5.13c

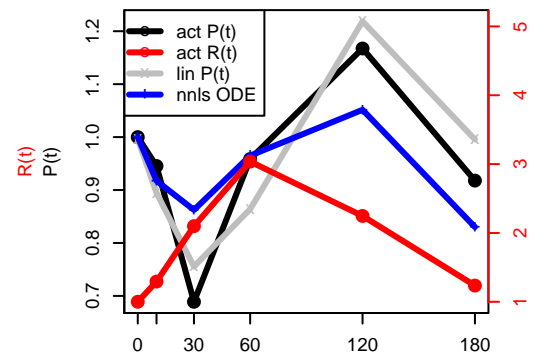

Time (min)  
ks = 0.00752296325654428 kd = 0.0176663443549933

SPBC1539.05

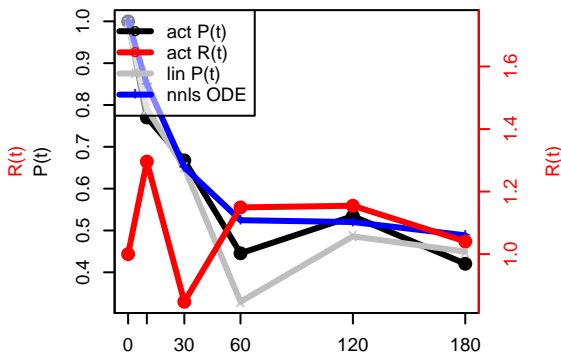

Time (min)  
ks = 0.0166893974401574 kd = 0.0372110374809179

SPBC15C4.05

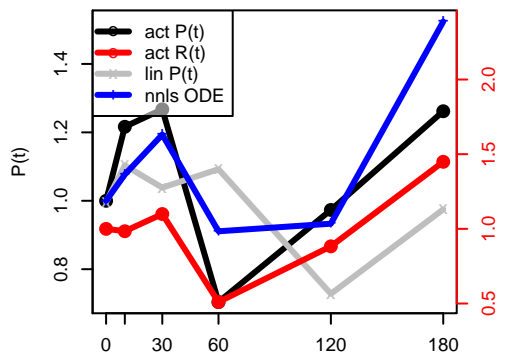

Time (min)  
ks = 0.0701648410650252 kd = 0.0594427156668563

SPBC1604.05

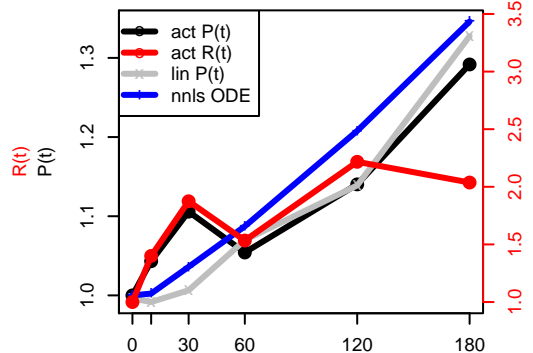

Time (min)  
ks = 0.00339780775754061 kd = 0.00385081766977747

SPBC16A3.02c

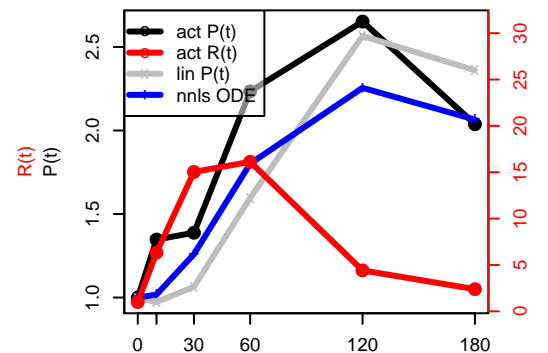

Time (min)  
ks = 0.00153625156954633 kd = 0.00385081766977747

SPBC16H5.02

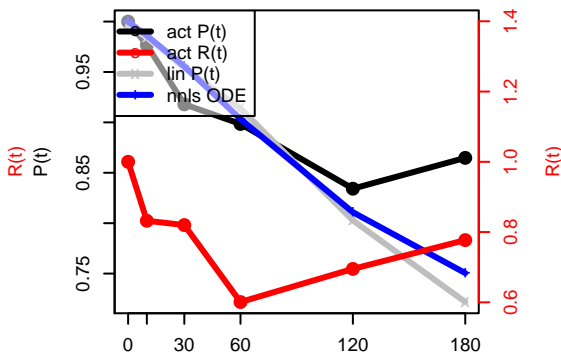

Time (min)  
ks = 0.00268009668546513 kd = 0.00385081766977747

SPBC16H5.08c

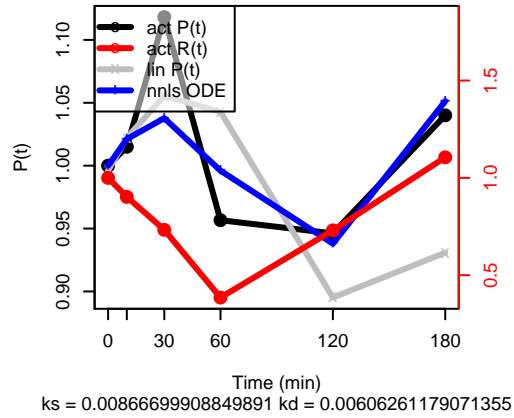

SPBC1711.08

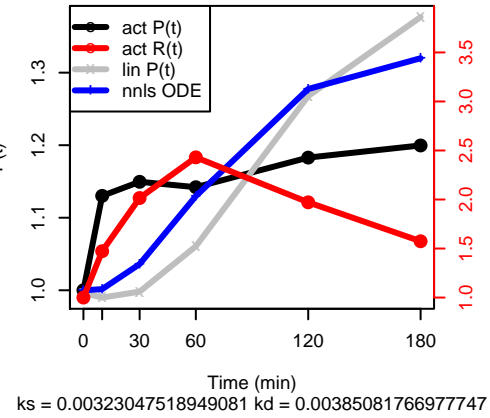

SPBC17D1.06

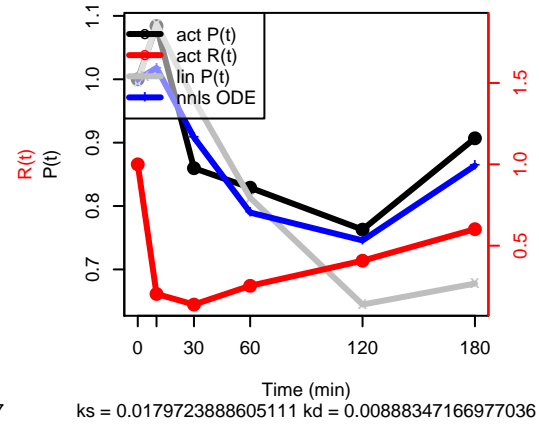

SPBC215.08c

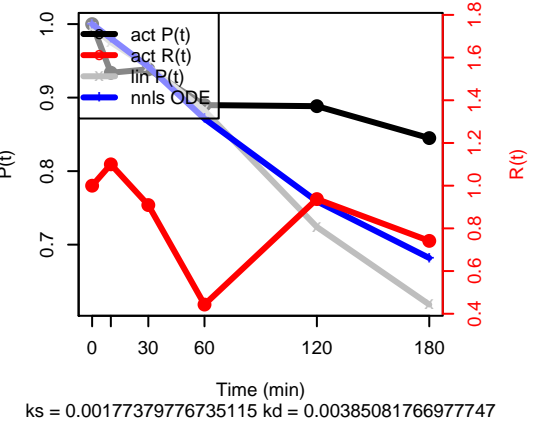

SPBC215.11c

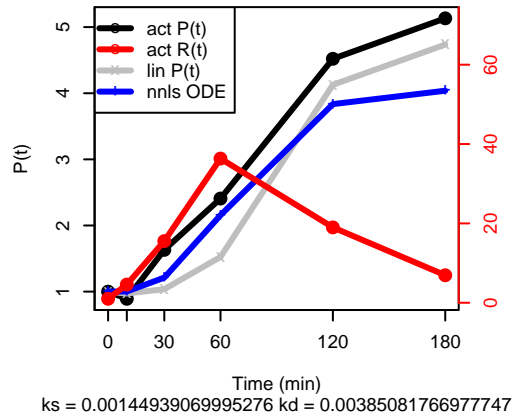

SPBC215.15

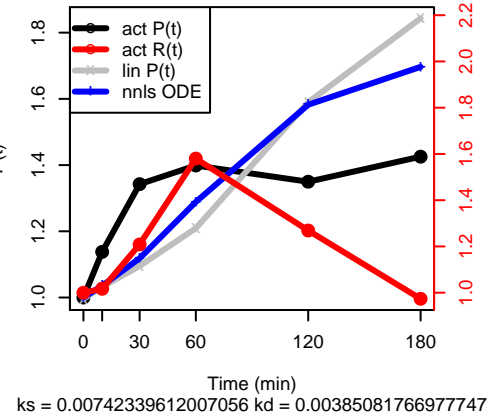

SPBC21B10.08c

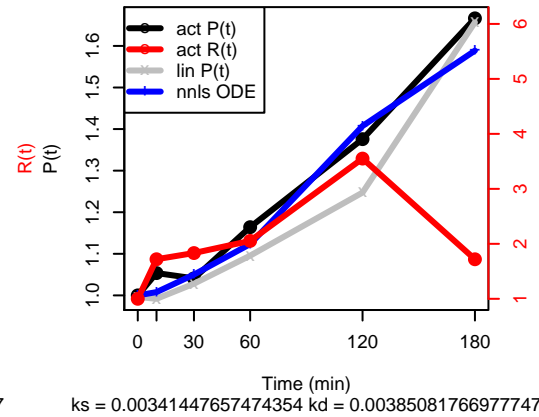

SPBC2A9.02

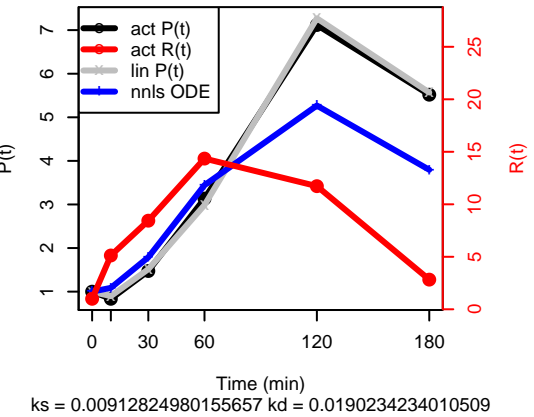

SPBC2F12.05c

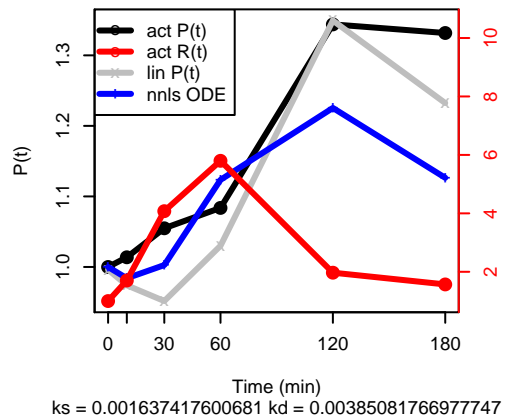

SPBC2G2.11

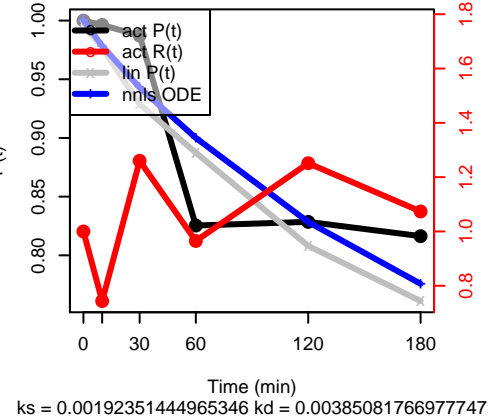

SPBC336.06c

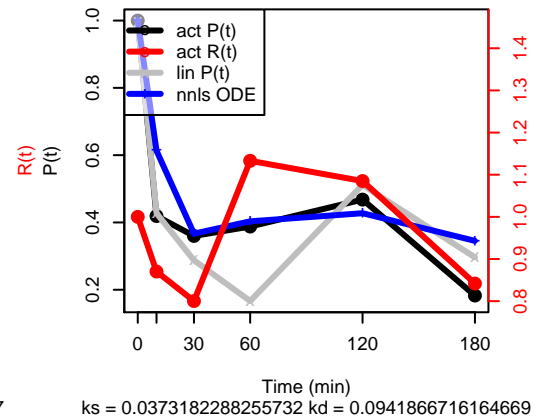

SPBC337.10c

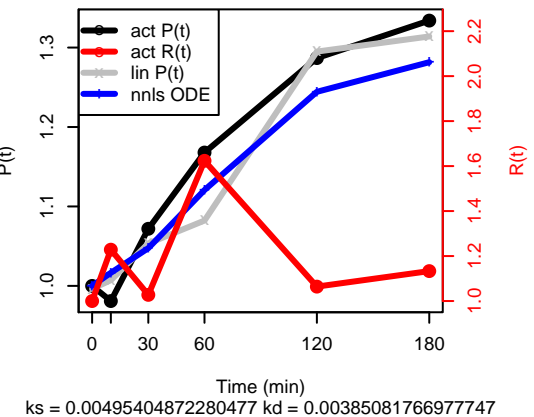

SPBC359.03c

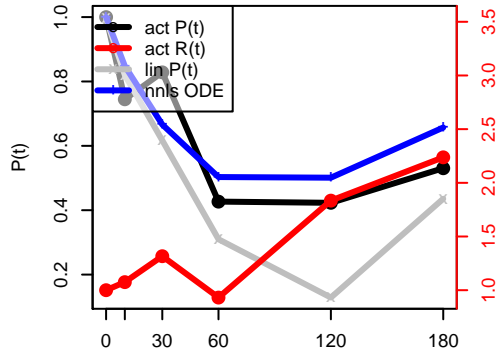

Time (min)  
ks = 0.00889966758166168 kd = 0.0265003661762774

SPBC3B9.01

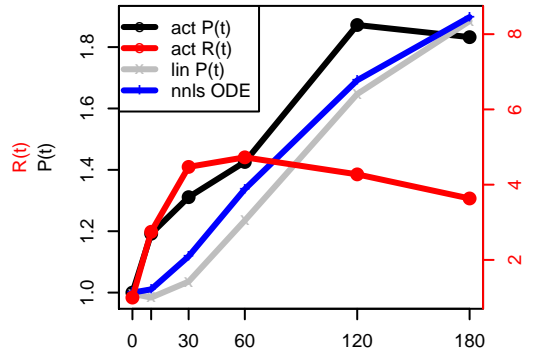

Time (min)  
ks = 0.00261416002677665 kd = 0.00385081766977747

SPBC3H7.11

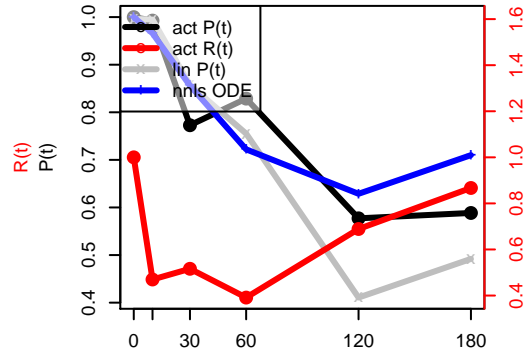

Time (min)  
ks = 0.0128527039597569 kd = 0.0129957233162787

SPBC3H7.15

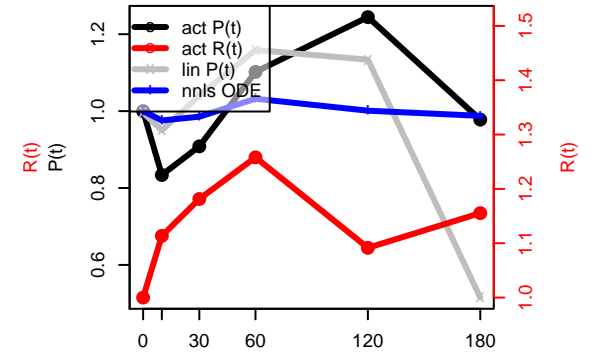

Time (min)  
ks = 0.0298710093667391 kd = 0.0344845423641972

SPBC409.07c

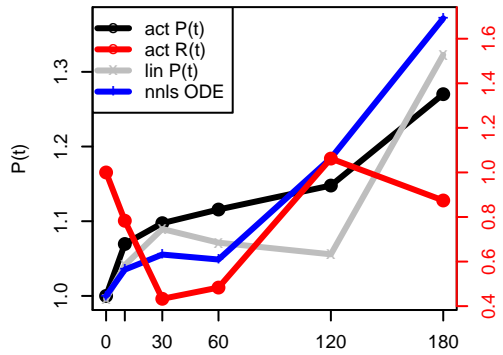

Time (min)  
ks = 0.00835094192189658 kd = 0.00385081766977747

SPBC4C3.07

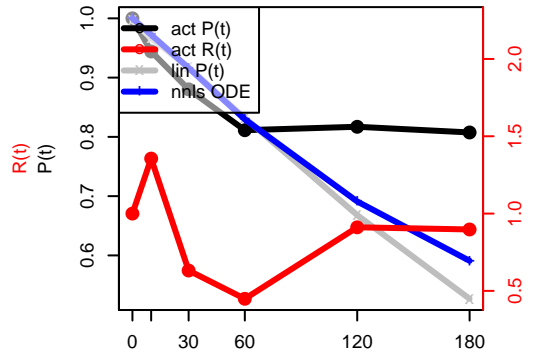

Time (min)  
ks = 0.000870016823535868 kd = 0.00385081766977747

SPBC4F6.16c

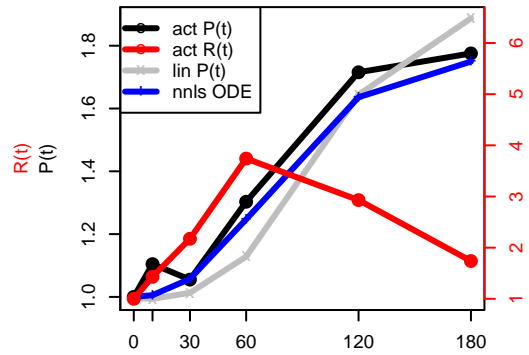

Time (min)  
ks = 0.00363807638287848 kd = 0.00385081766977747

SPBC4F6.17c

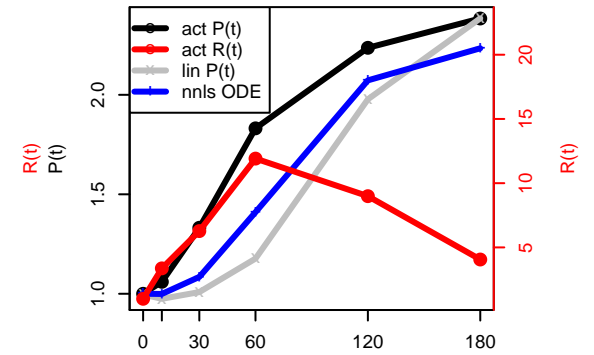

Time (min)  
ks = 0.00171186585285417 kd = 0.00385081766977747

SPBC56F2.06

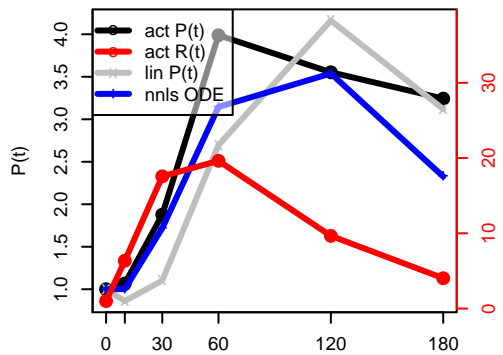

Time (min)  
ks = 0.00499767619685141 kd = 0.0184782948087014

SPBC577.10

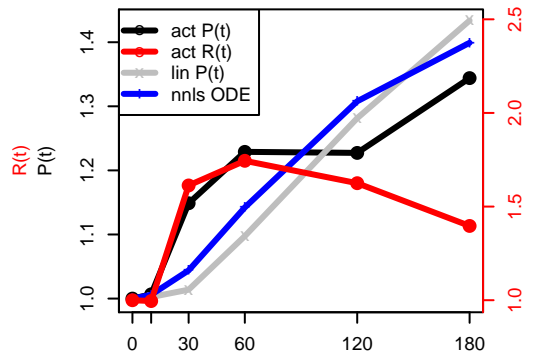

Time (min)  
ks = 0.00447075152112678 kd = 0.00385081766977747

SPBC660.07

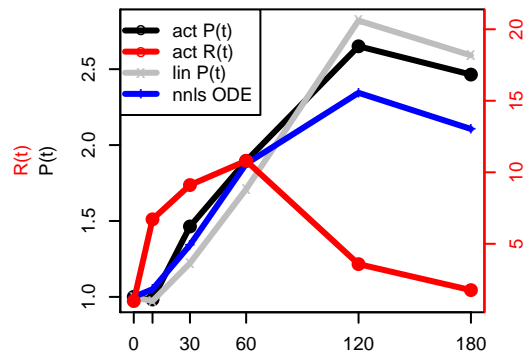

Time (min)  
ks = 0.00257706349605488 kd = 0.0049241825109571

SPBC691.03c

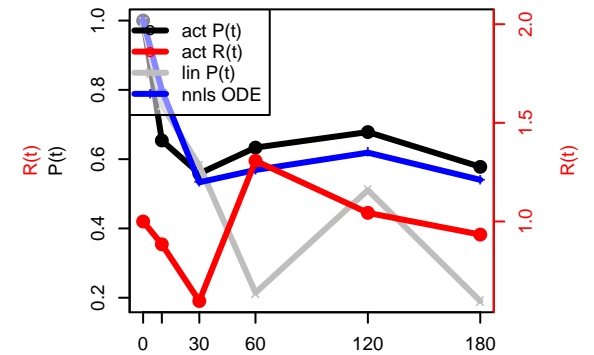

Time (min)  
ks = 0.0298041544381166 kd = 0.05373245260445

SPBC6B1.08c

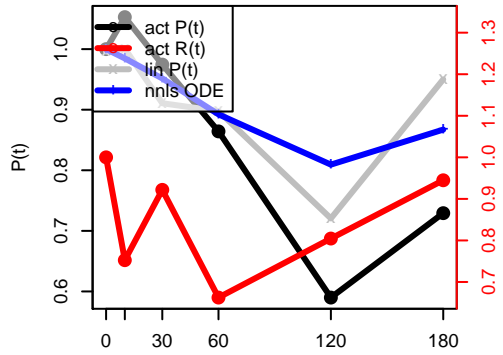

Time (min)  
ks = 0.0165748131826239 kd = 0.0161222618795266

SPBC713.02c

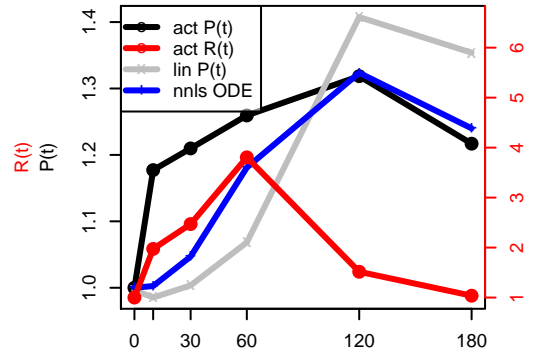

Time (min)  
ks = 0.00275981732243306 kd = 0.00385081766977747

SPBC725.02

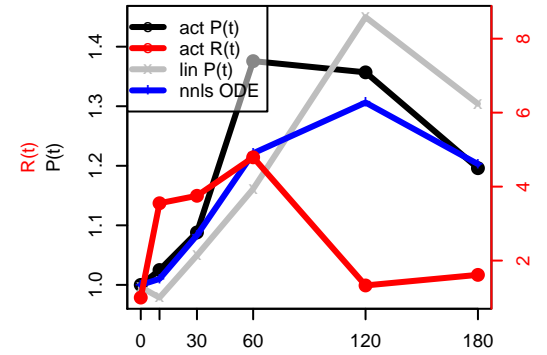

Time (min)  
ks = 0.00210885336333233 kd = 0.00385081766977747

SPBC839.03c

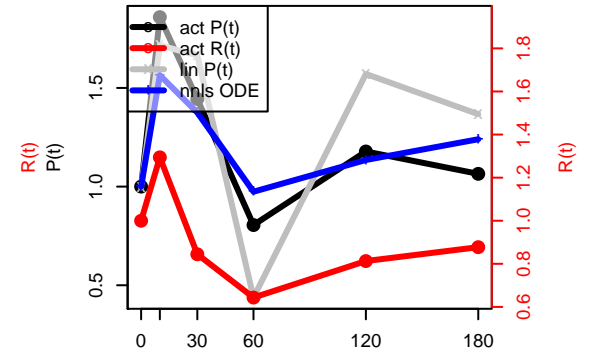

Time (min)  
ks = 0.24172928497972 kd = 0.169704192598066

SPBC8E4.01c

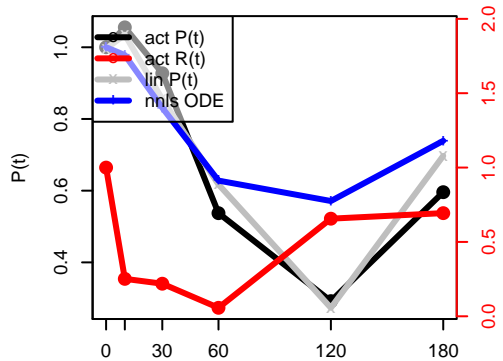

Time (min)  
ks = 0.0162729390649865 kd = 0.0123961328536326

SPBC8E4.04

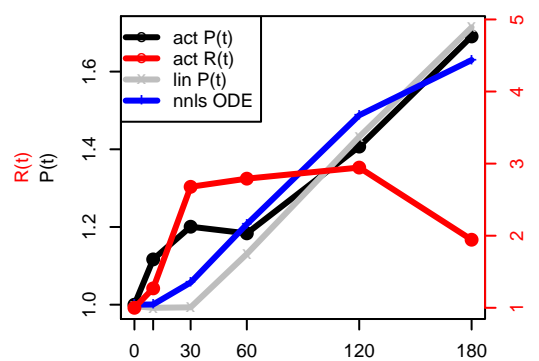

Time (min)  
ks = 0.00343411587005573 kd = 0.00385081766977747

SPBC9B6.07

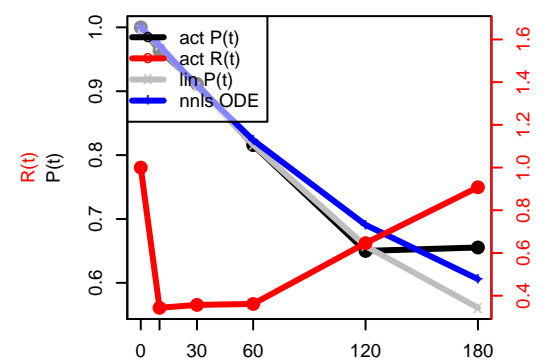

Time (min)  
ks = 0.00137968076368573 kd = 0.00385081766977747

SPBP35G2.07

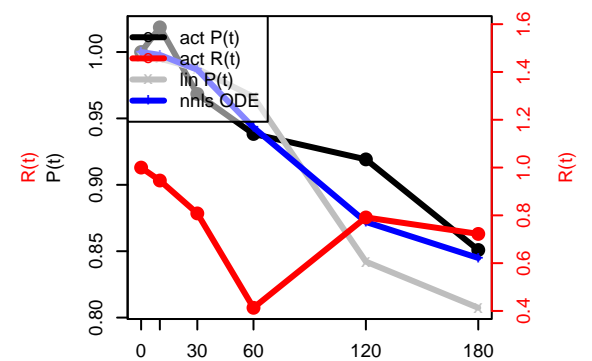

Time (min)  
ks = 0.00374054809772113 kd = 0.00385081766977747

SPBP4H10.12

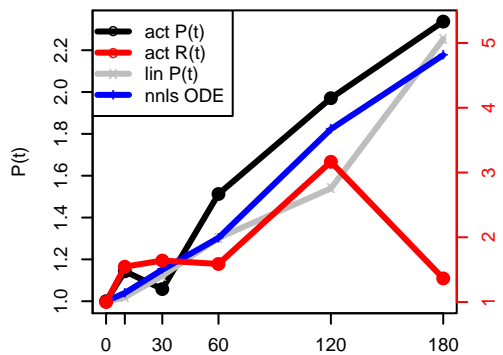

Time (min)  
ks = 0.00615676232941242 kd = 0.00385081766977747

SPBP8B7.17c

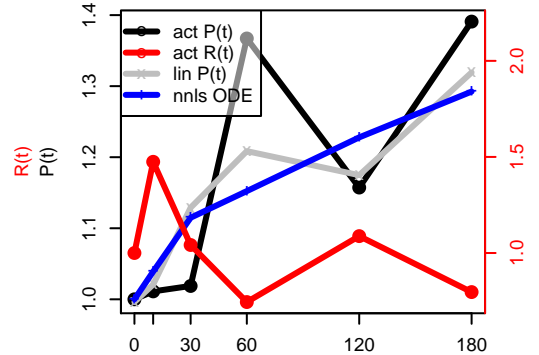

Time (min)  
ks = 0.00631110730171475 kd = 0.00385081766977747

SPBPB10D8.02c

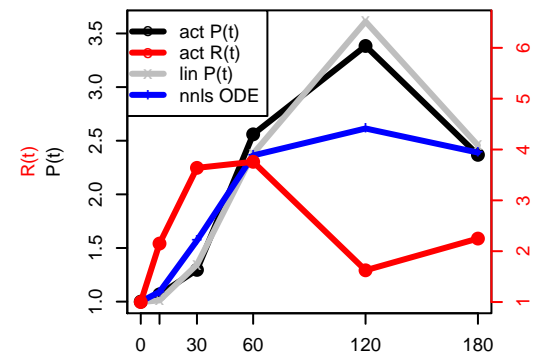

Time (min)  
ks = 0.0138713483338243 kd = 0.0123448407482737

SPCC1235.05c

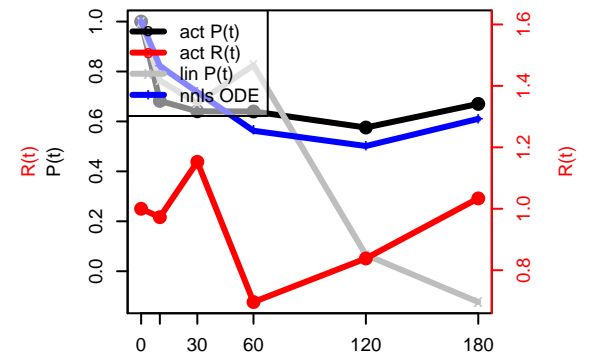

Time (min)  
ks = 0.0389515602227833 kd = 0.062184234470482

SPCC126.03

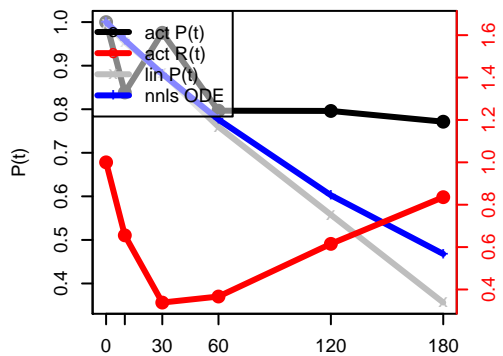

Time (min)  
ks = 0 kd = 0.00422140781639814

SPCC1281.03c

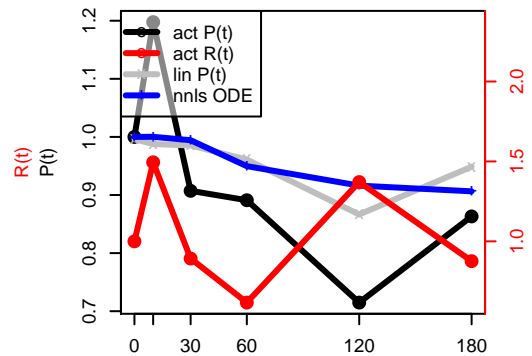

Time (min)  
ks = 0.0030069506450471 kd = 0.00385081766977747

SPCC1322.08

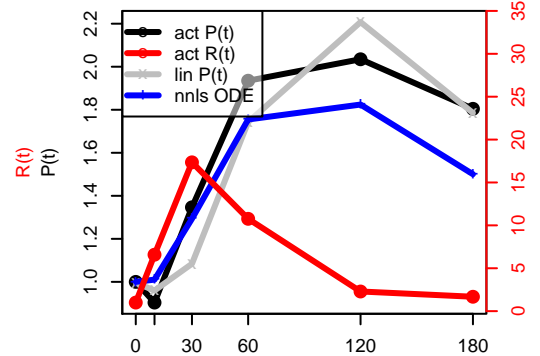

Time (min)  
ks = 0.00168074706702072 kd = 0.00534747819821271

SPCC1672.12c

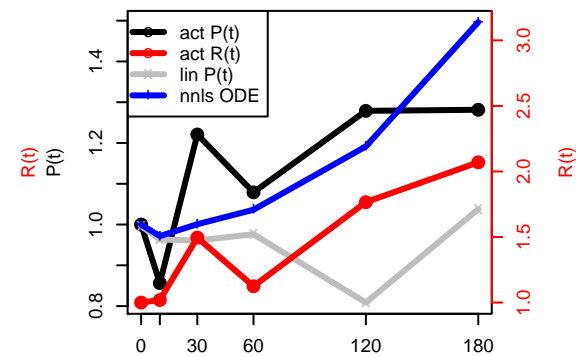

Time (min)  
ks = 0.0164516101563738 kd = 0.01973414585825

SPCC330.06c

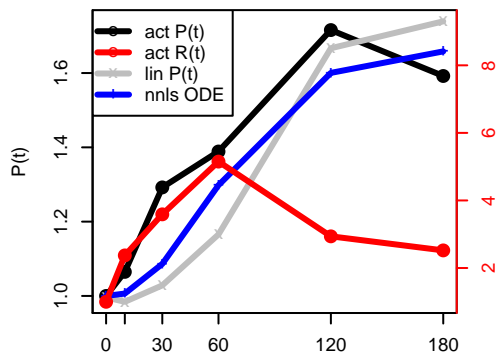

Time (min)  
ks = 0.00265967021161426 kd = 0.00385081766977747

SPCC330.12c

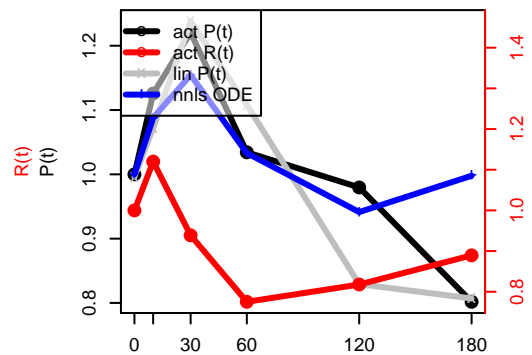

Time (min)  
ks = 0.0483104192228442 kd = 0.0407081640658688

SPCC550.09

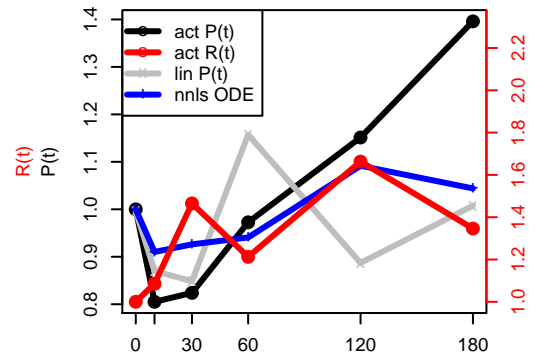

Time (min)  
ks = 0.0322486309140039 kd = 0.044837956450447

SPCC594.02c

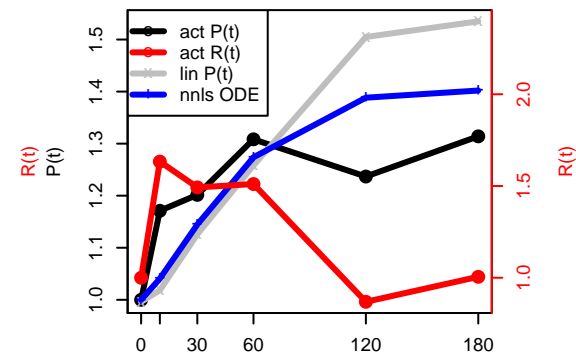

Time (min)  
ks = 0.00605666200506667 kd = 0.00385081766977747

SPCC63.11

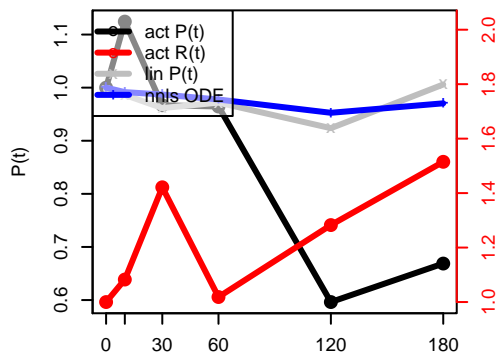

Time (min)  
ks = 0.00285937064480806 kd = 0.00385081766977747

SPCC645.08c

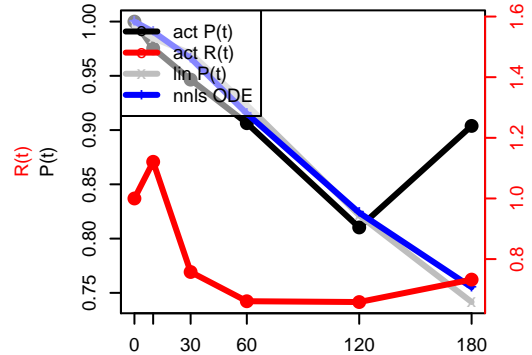

Time (min)  
ks = 0.00271759285486807 kd = 0.00385081766977747

SPCC737.02c

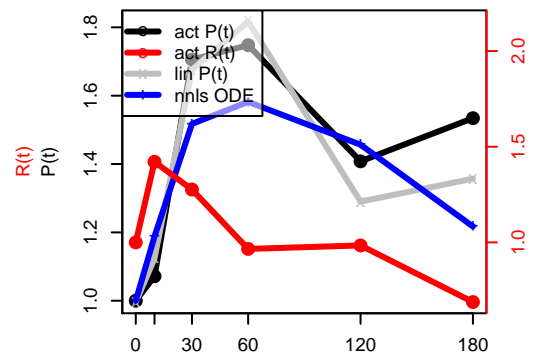

Time (min)  
ks = 0.039774072738102 kd = 0.0270038041284101

SPCC737.06c

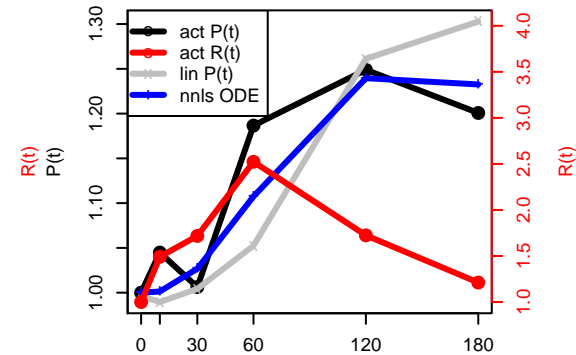

Time (min)  
ks = 0.00319033930731579 kd = 0.00385081766977747

SPCC777.12c

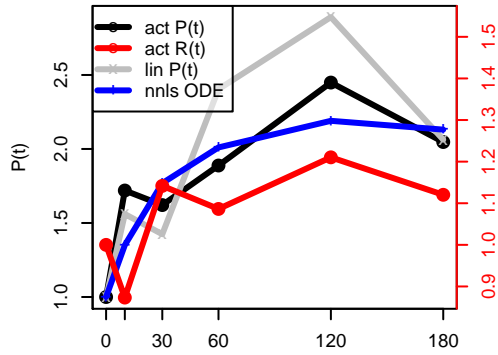

Time (min)  
ks = 0.122699644821206 kd = 0.0662820909474039

SPCP1E11.02

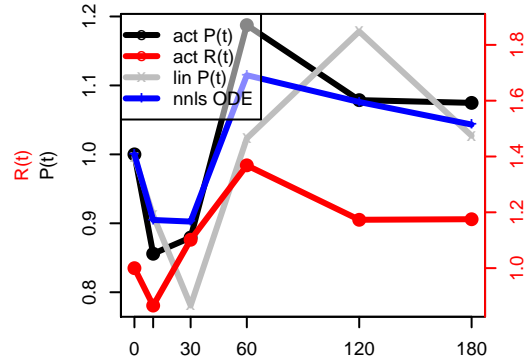

Time (min)  
ks = 0.0698483835413952 kd = 0.0783118971525201

SPCPJ732.02c

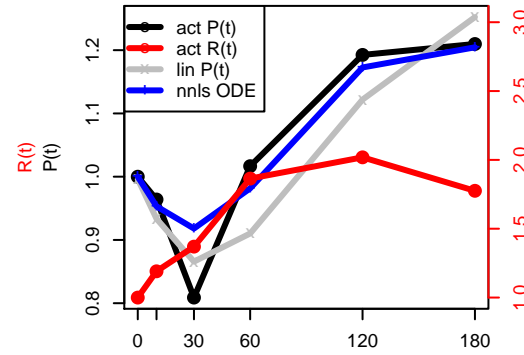

Time (min)  
ks = 0.0116732266358849 kd = 0.01793655216105

SPAC10F6.08c

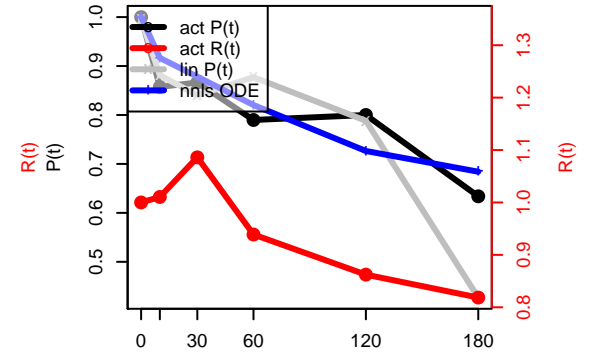

Time (min)  
ks = 0.0509665202876224 kd = 0.0624643424655487

SPAC140.02

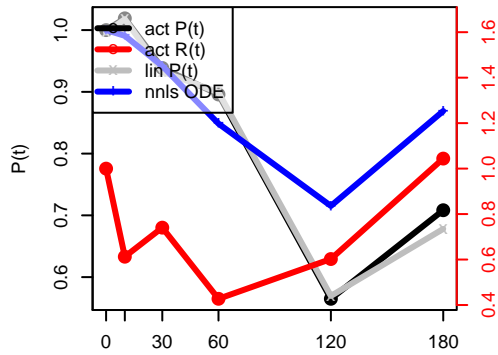

Time (min)  
ks = 0.0158489348492548 kd = 0.0136952585583441

SPAC1556.02c

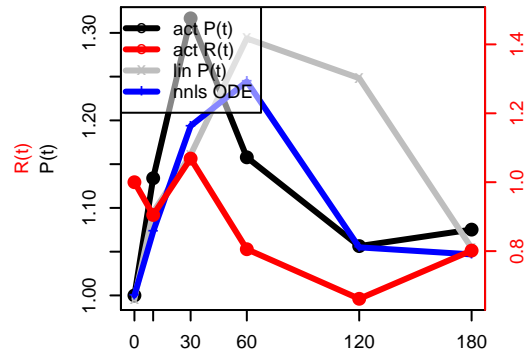

Time (min)  
ks = 0.0346750785057212 kd = 0.0247788064574657

SPAC16.03c

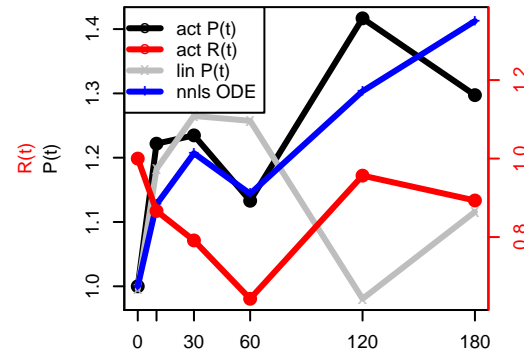

Time (min)  
ks = 0.0524544806618378 kd = 0.0338259091304096

SPAC16.04

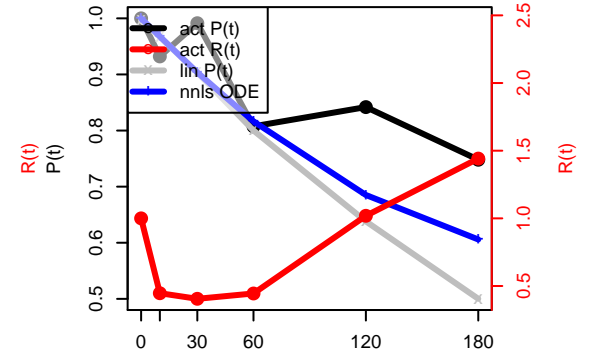

Time (min)  
ks = 0.00092375345338054 kd = 0.00385081766977747

SPAC17C9.10

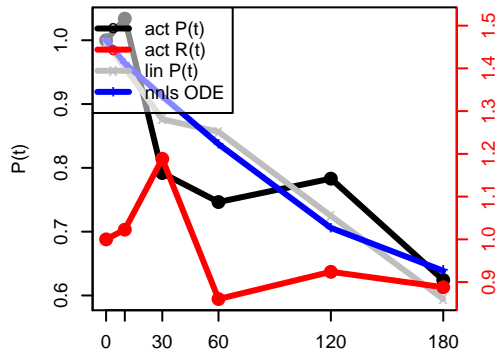

Time (min)  
ks = 0.0060884726237648 kd = 0.00995934703947073

SPAC17D4.04

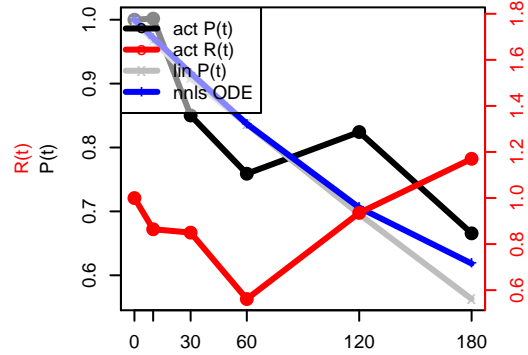

Time (min)  
ks = 0.00102620747235841 kd = 0.00385081766977747

SPAC17G6.10

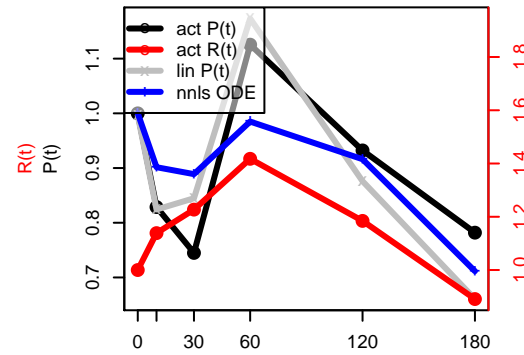

Time (min)  
ks = 0.0493012654325333 kd = 0.0664984673683463

SPAC1805.06c

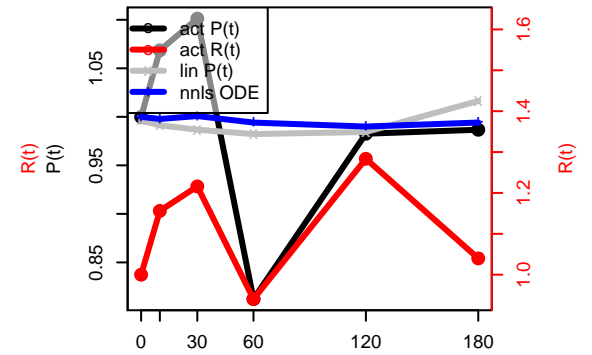

Time (min)  
ks = 0.00336363579538909 kd = 0.00385081766977747



SPAC1F3.06c

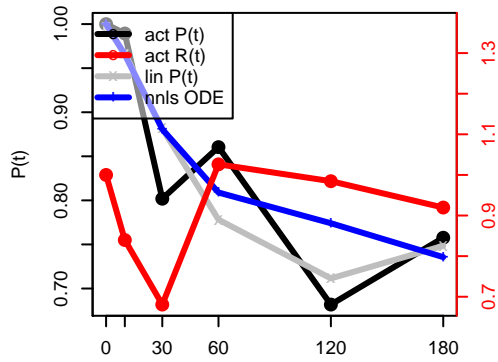

Time (min)  
ks = 0.00873321551858372 kd = 0.0117069995253323

SPAC1F7.04

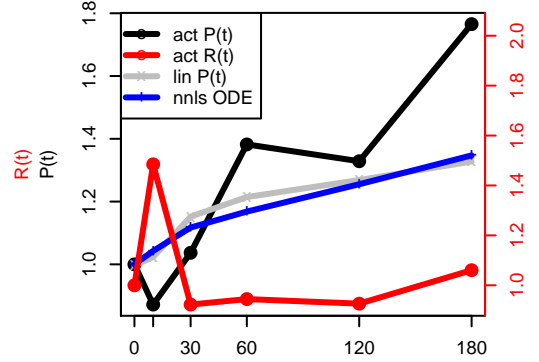

Time (min)  
ks = 0.00658656550690792 kd = 0.00385081766977747

SPAC22G7.06c

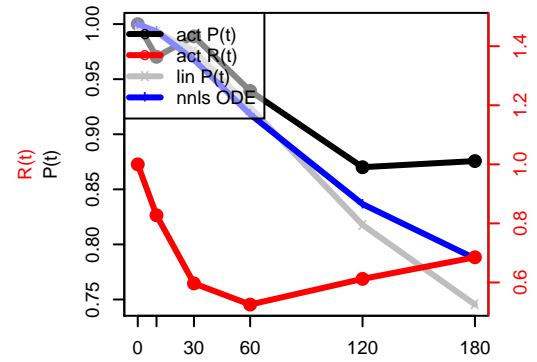

Time (min)  
ks = 0.0035031752120703 kd = 0.00385081766977747

SPAC23C4.17

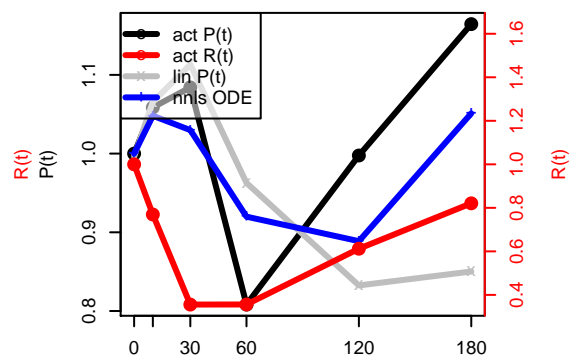

Time (min)  
ks = 0.0172185655758001 kd = 0.0102711566554812

SPAC23D3.09

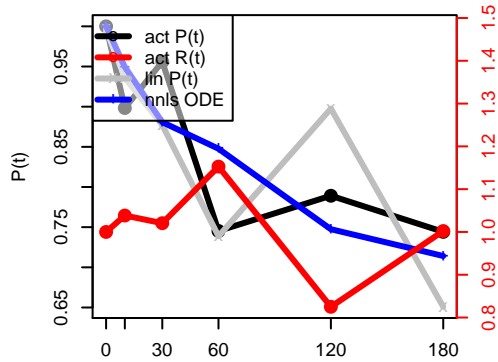

Time (min)  
ks = 0.0174835793129714 kd = 0.0234908802089938

SPAC24C9.02c

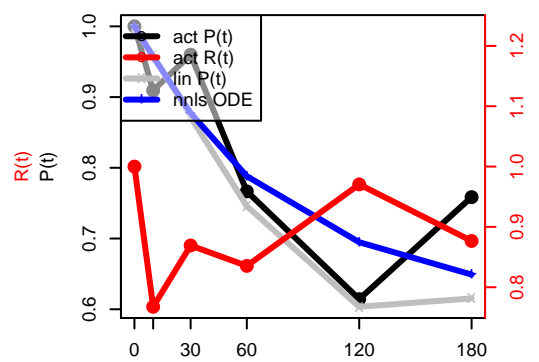

Time (min)  
ks = 0.00696280938703 kd = 0.0106783780714736

SPAC24C9.08

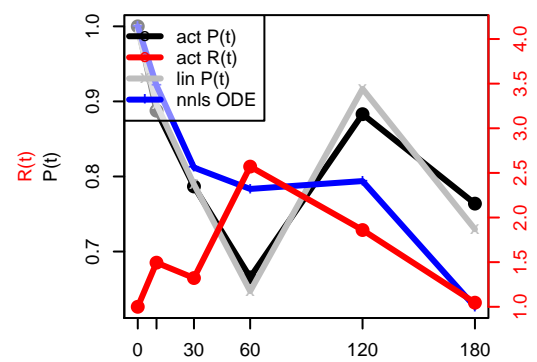

Time (min)  
ks = 0.00585388057796126 kd = 0.0158628224738589

SPAC26A3.15c

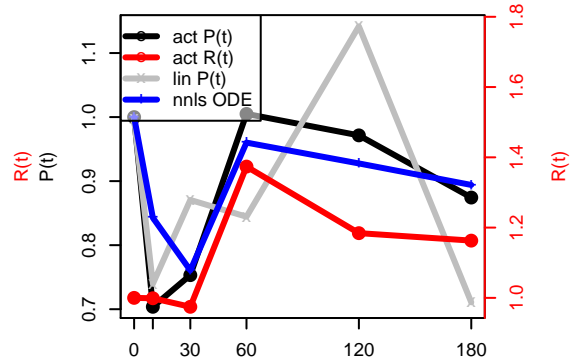

Time (min)  
ks = 0.0833414199516469 kd = 0.108987926965998

SPAC26F1.03

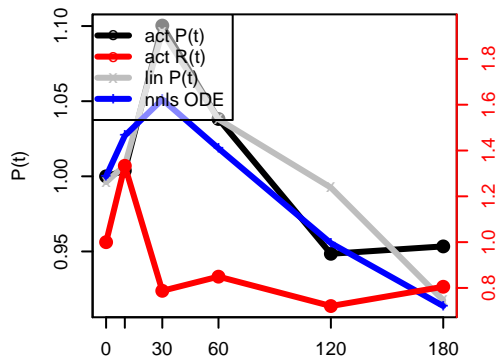

Time (min)  
ks = 0.0101265682770066 kd = 0.00901544196084001

SPAC2E1P3.01

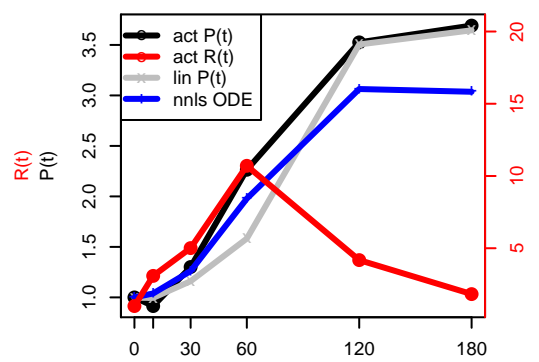

Time (min)  
ks = 0.00380715186499463 kd = 0.00385081766977747

SPAC2F3.06c

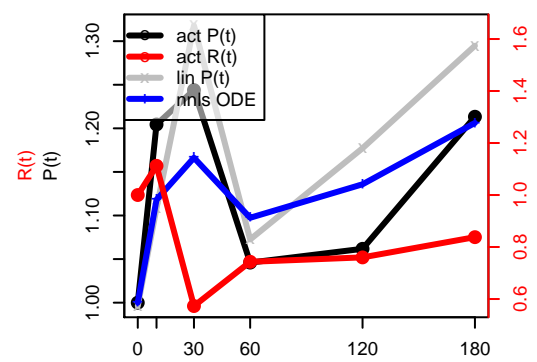

Time (min)  
ks = 0.0329980346176157 kd = 0.0217757656672816

SPAC2F3.11

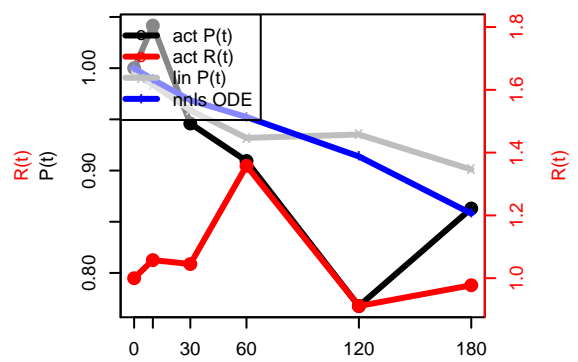

Time (min)  
ks = 0.00261940944697209 kd = 0.00385081766977747

SPAC328.03

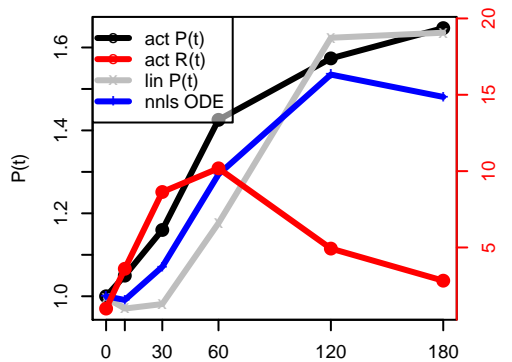

Time (min)  
ks = 0.00127082669021672 kd = 0.00385081766977747

SPAC343.16

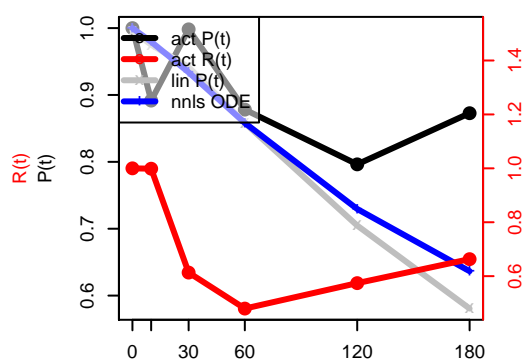

Time (min)  
ks = 0.0017971261980334 kd = 0.0038934527370155

SPAC3A12.17c

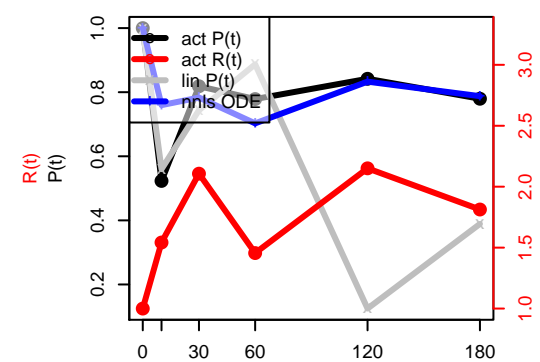

Time (min)  
ks = 0.0314291923614879 kd = 0.0750661674413212

SPAC3H5.12c

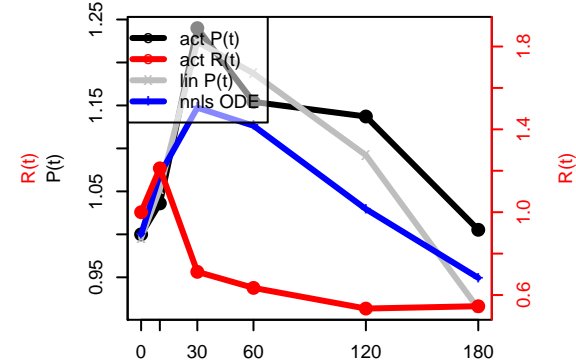

Time (min)  
ks = 0.0155829026326951 kd = 0.0099424622310295

SPAC4C5.01

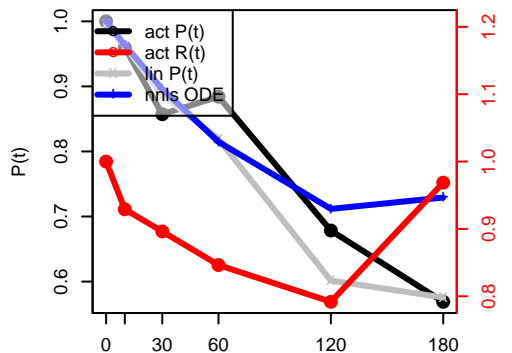

Time (min)  
ks = 0.0164906973509169 kd = 0.0198848685918303

SPAC4F10.20

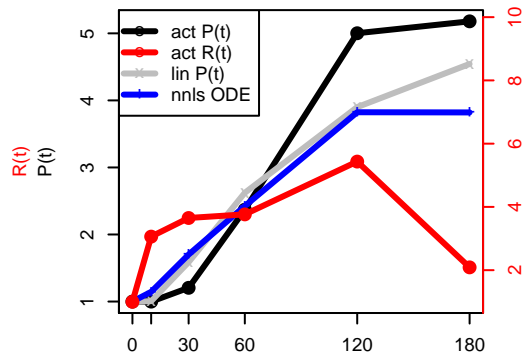

Time (min)  
ks = 0.0136289144307671 kd = 0.0126608709169946

SPAC4H3.07c

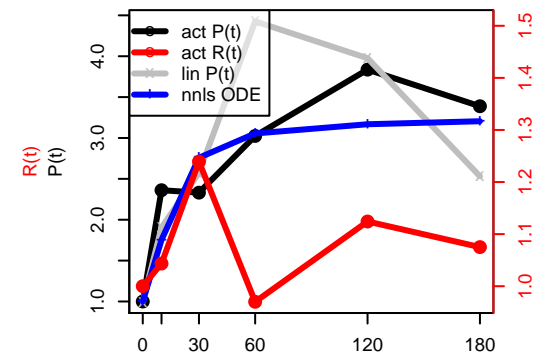

Time (min)  
ks = 0.137345558028996 kd = 0.0465219999569538

SPAC521.03

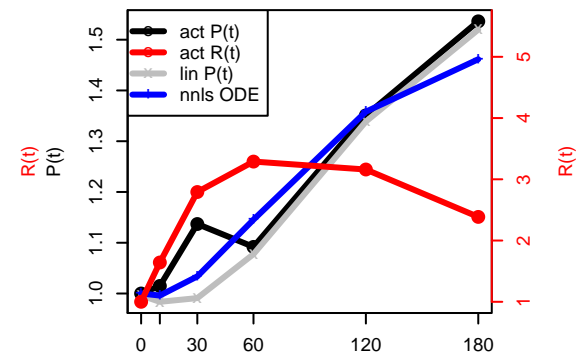

Time (min)  
ks = 0.00260147874814592 kd = 0.00385081766977747

SPAC56F8.05c

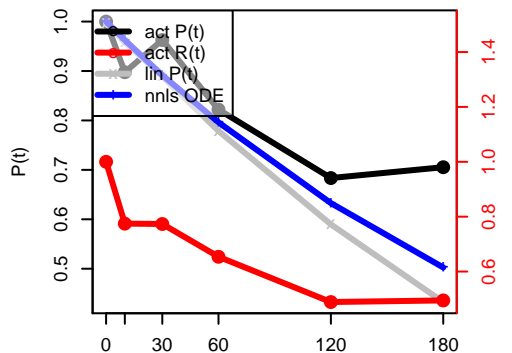

Time (min)  
ks = 2.71113638998869e-05 kd = 0.00385081766977747

SPAC56F8.11

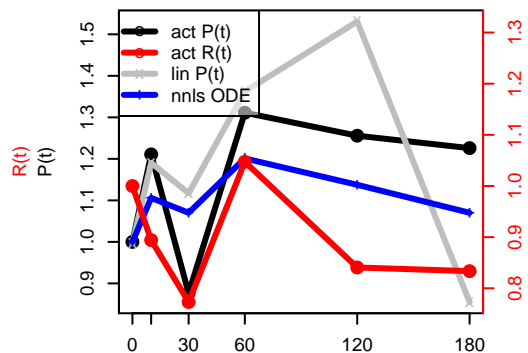

Time (min)  
ks = 0.0859645776900348 kd = 0.0665196807777683

SPAC607.03c

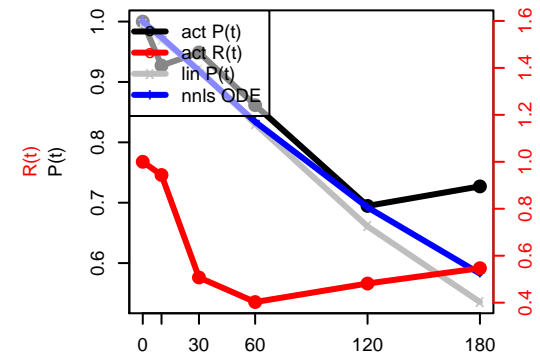

Time (min)  
ks = 0.00121921247407826 kd = 0.00385081766977747

SPAC637.04

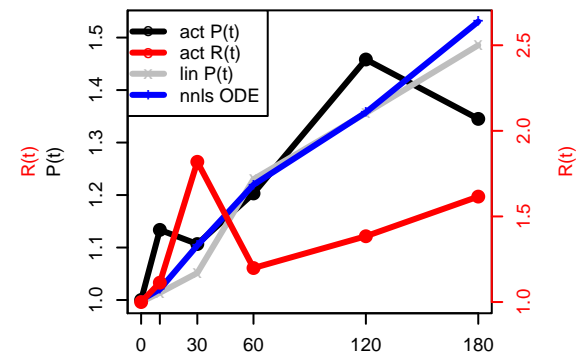

Time (min)  
ks = 0.00561542047038899 kd = 0.00385081766977747

SPAC694.05c

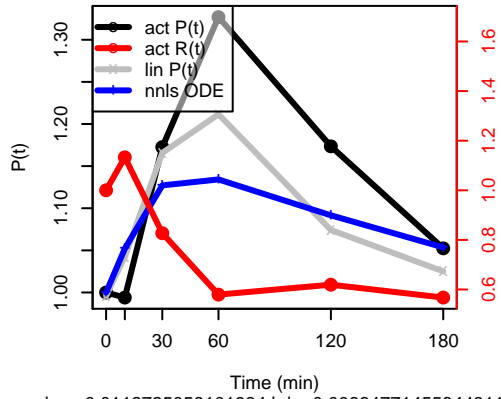

SPAC6G10.03c

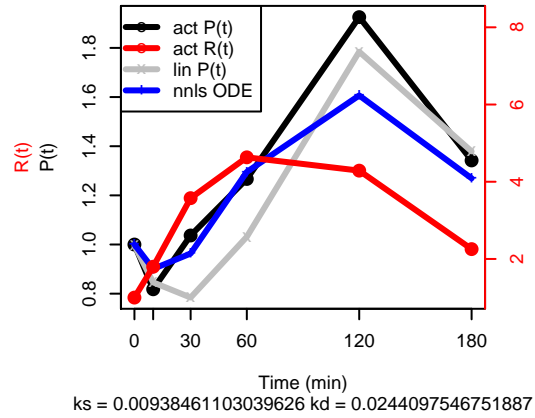

SPAC6G9.10c

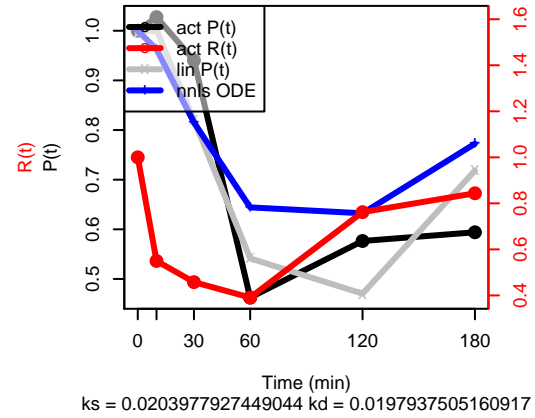

SPAC821.06

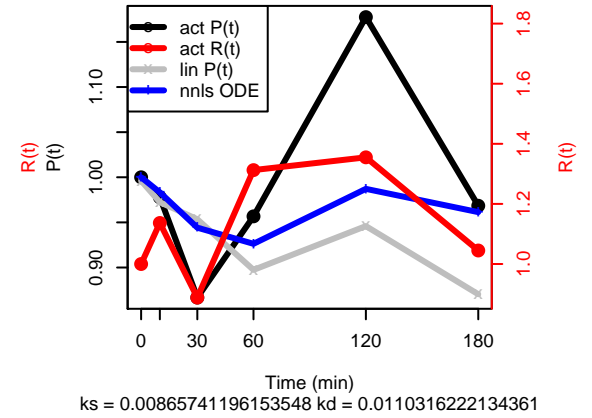

SPAC926.08c

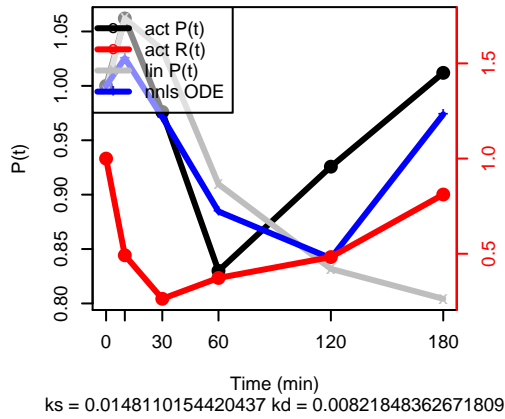

SPAP11E10.01

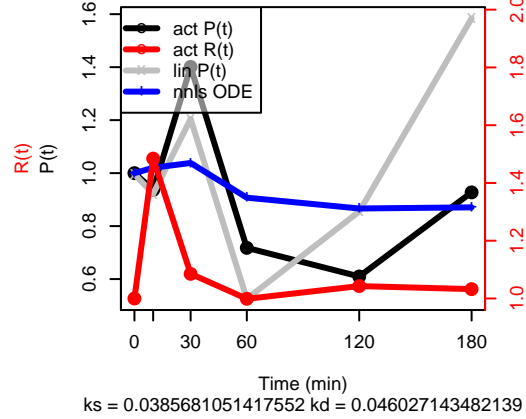

SPAPYUK71.03c

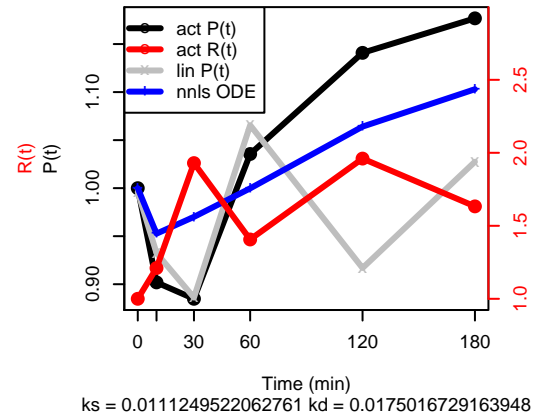

SPBC1215.01

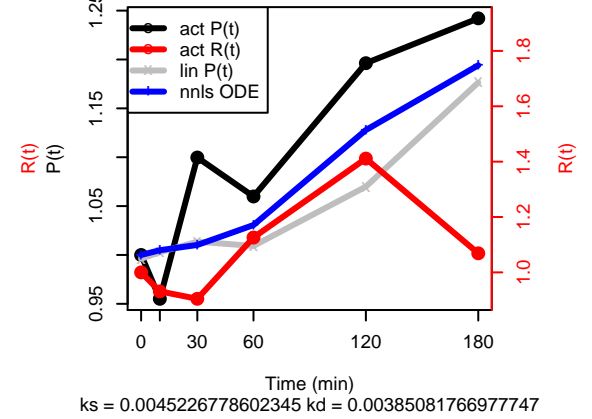

SPBC1604.01

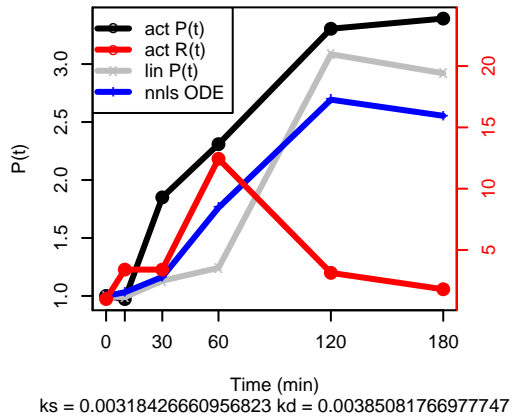

SPBC1604.14c

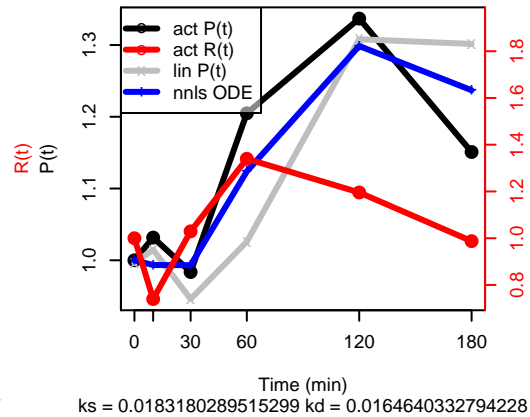

SPBC1778.10c

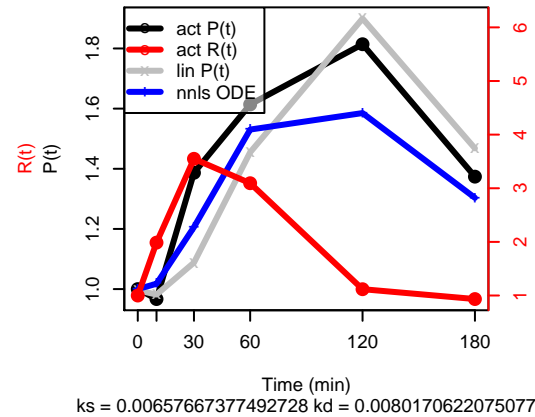

SPBC17D11.08

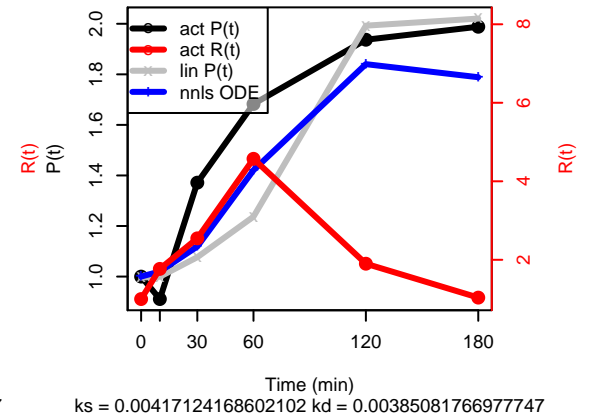

SPBC18H10.13

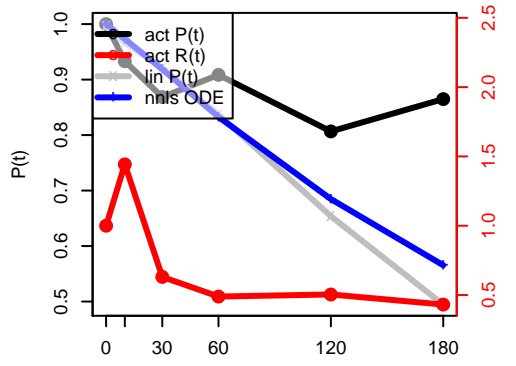

Time (min)  
ks = 0.000898152131911448 kd = 0.00385081766977747

SPBC19G7.10c

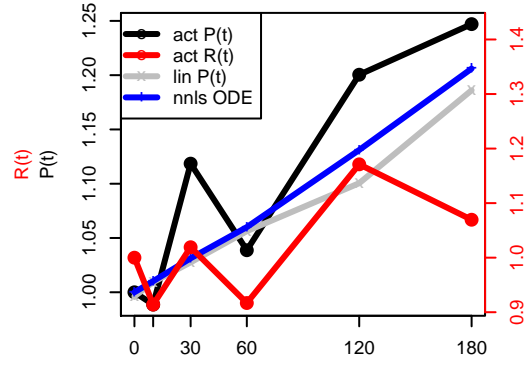

Time (min)  
ks = 0.0051656417708396 kd = 0.00385081766977747

SPBC211.03c

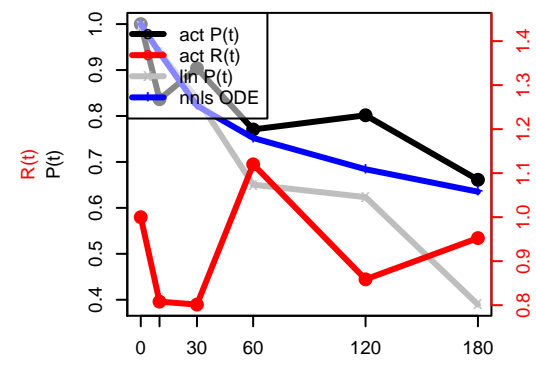

Time (min)  
ks = 0.0111955839909805 kd = 0.0168573974396256

SPBC21H7.07c

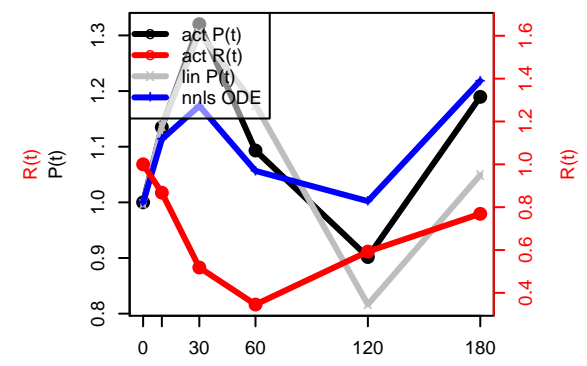

Time (min)  
ks = 0.0286184417621609 kd = 0.0145110622691715

SPBC25D12.04

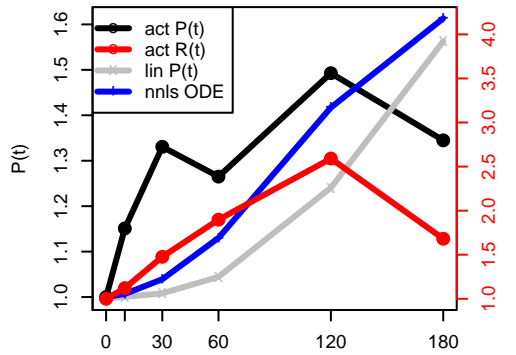

Time (min)  
ks = 0.00428980625622384 kd = 0.00385081766977747

SPBC29A10.16c

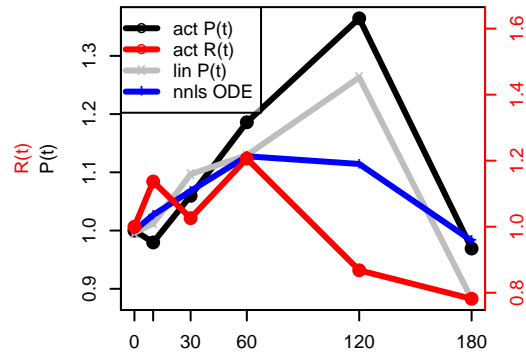

Time (min)  
ks = 0.01709941854693 kd = 0.0155200630612684

SPBC29A3.02c

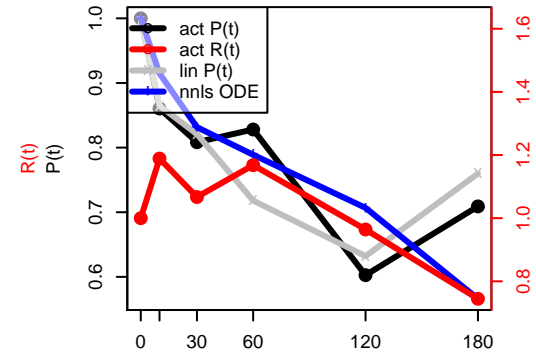

Time (min)  
ks = 0.027801493421911 kd = 0.0409477194609565

SPBC2G5.05

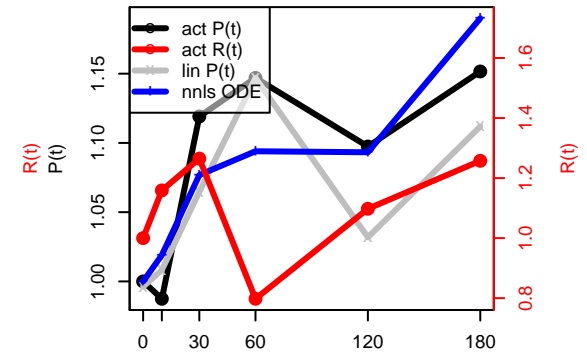

Time (min)  
ks = 0.00947111868004254 kd = 0.00825879312874941

SPBC30D10.06

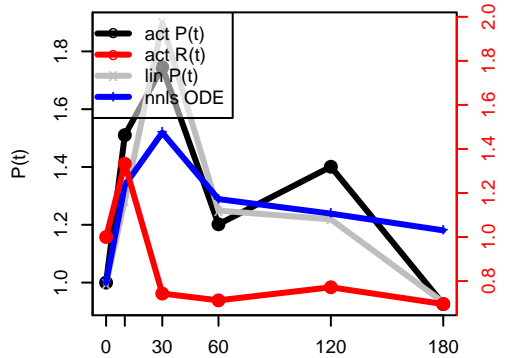

Time (min)  
ks = 0.071526054688242 kd = 0.0428148471439878

SPBC32F12.03c

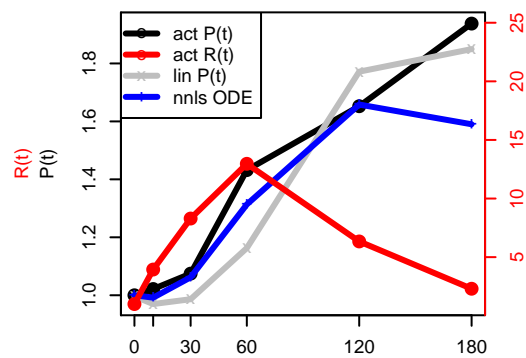

Time (min)  
ks = 0.00120795629353785 kd = 0.00385081766977747

SPBC32F12.11

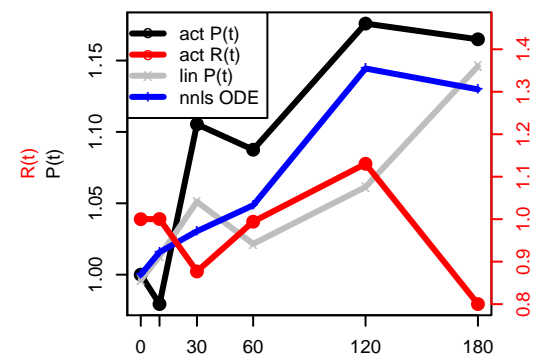

Time (min)  
ks = 0.0124388307344498 kd = 0.0107590690336502

SPBC365.14c

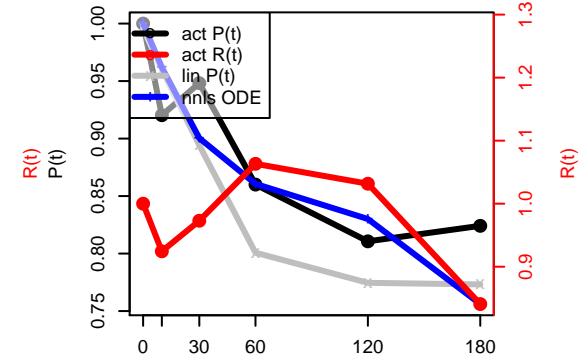

Time (min)  
ks = 0.0132012655649074 kd = 0.0168294213678912

SPBC3B9.14c

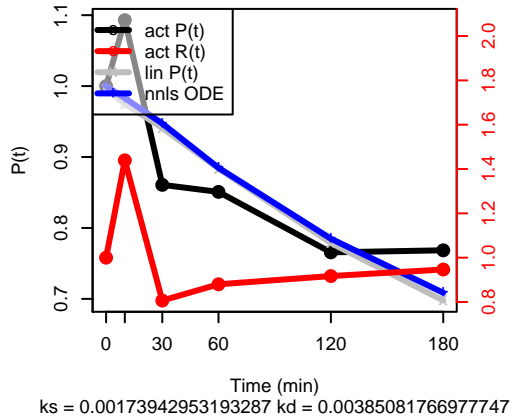

SPBC577.11

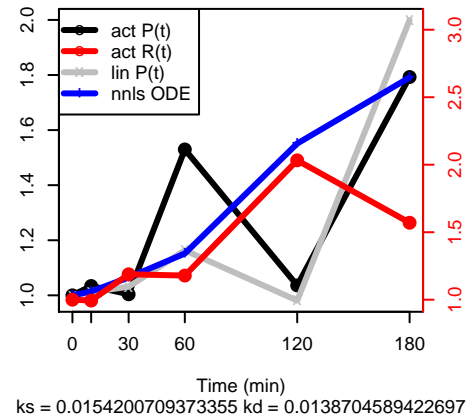

SPBC691.04

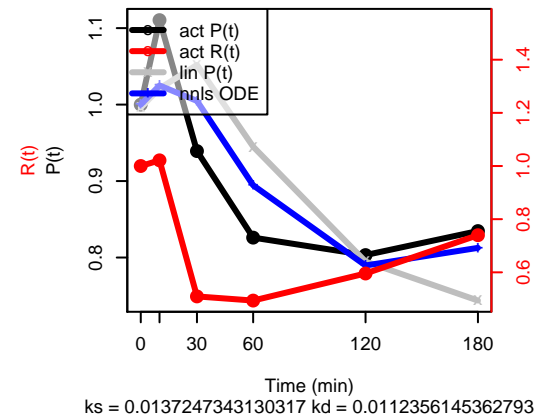

SPBC6B1.07

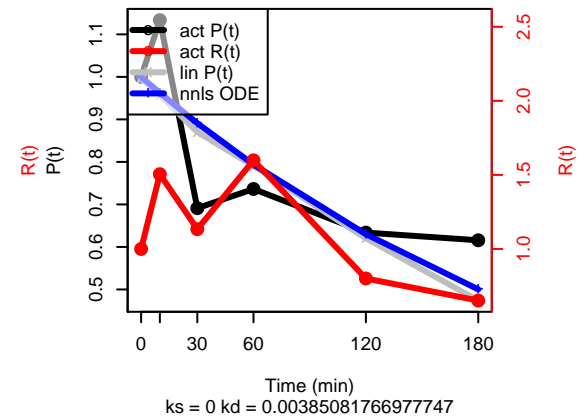

SPBC800.09

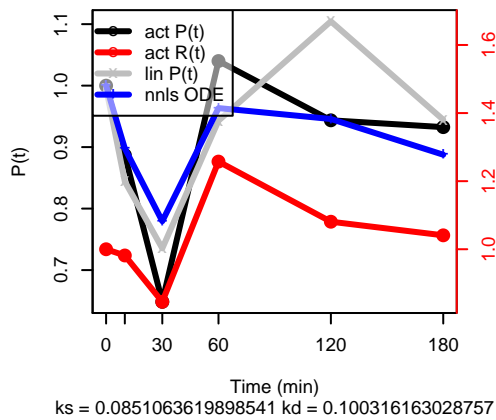

SPBC947.02

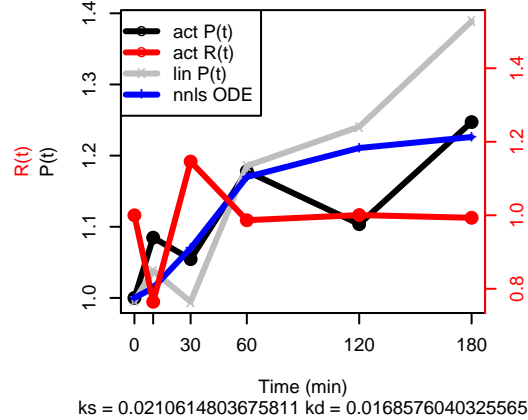

SPBP23A10.08

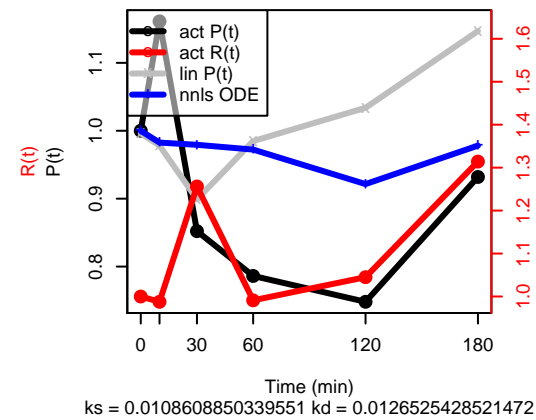

SPBP4H10.15

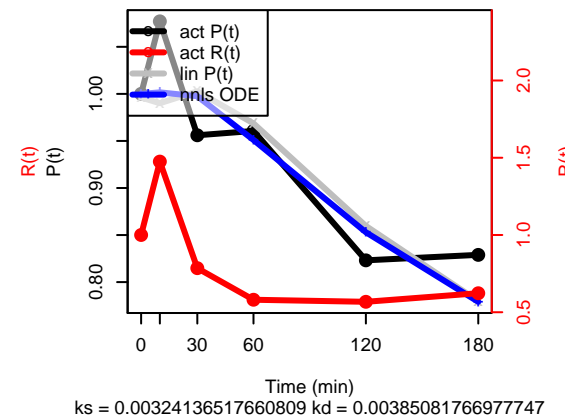

SPBP4H10.20

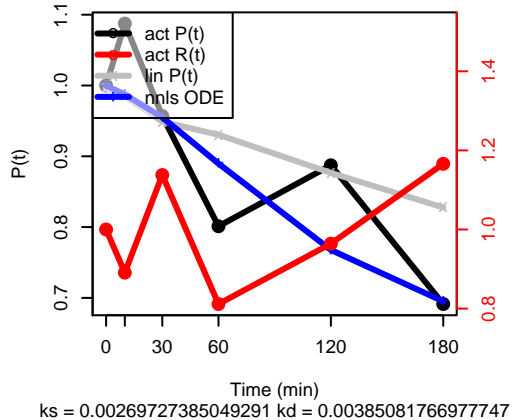

SPBP8B7.21

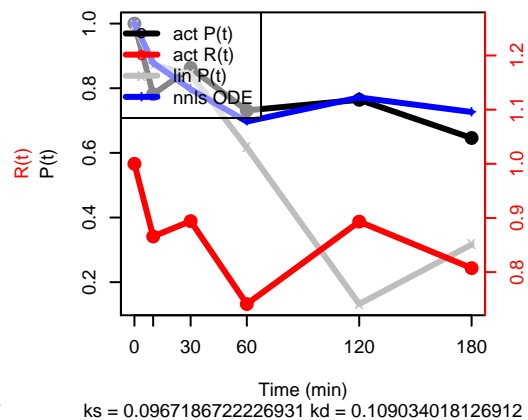

SPCC1223.08c

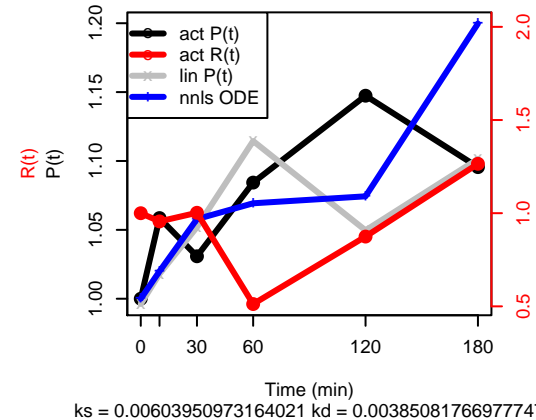

SPCC1620.07c

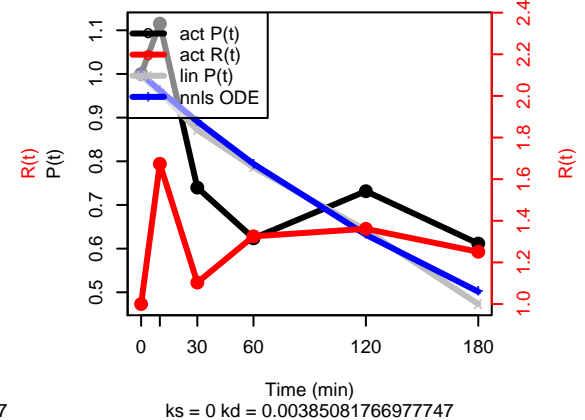

SPCC1682.01

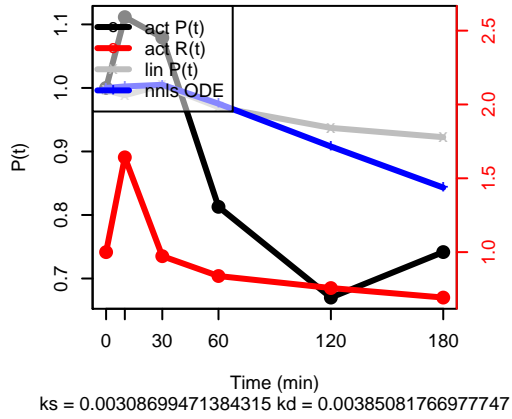

SPCC338.10c

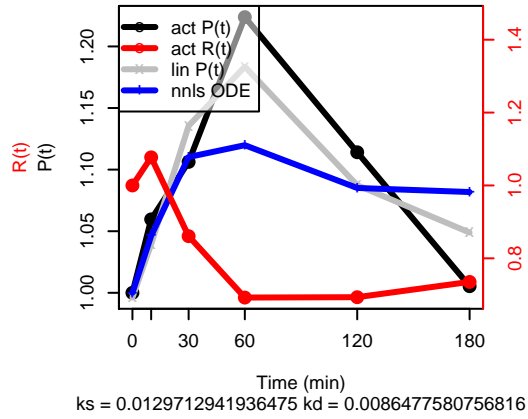

SPCC576.08c

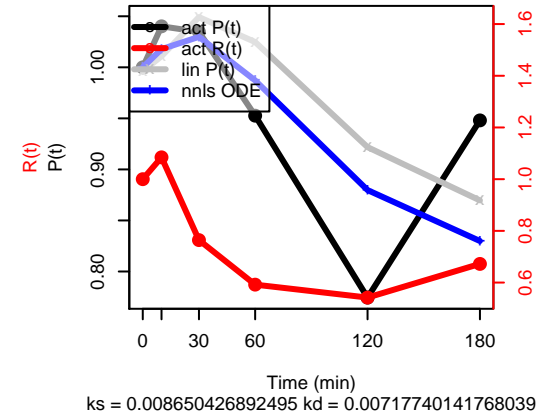

SPCC622.10c

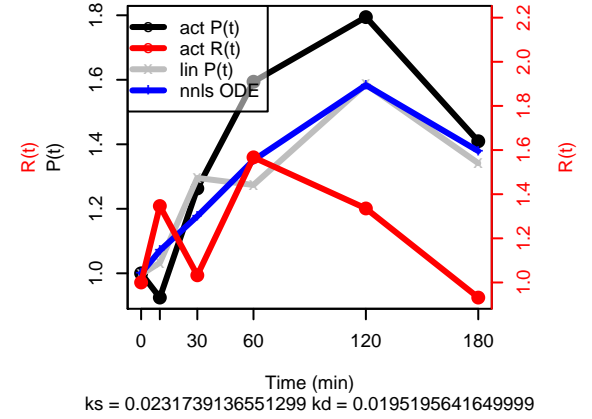

SPCC663.03

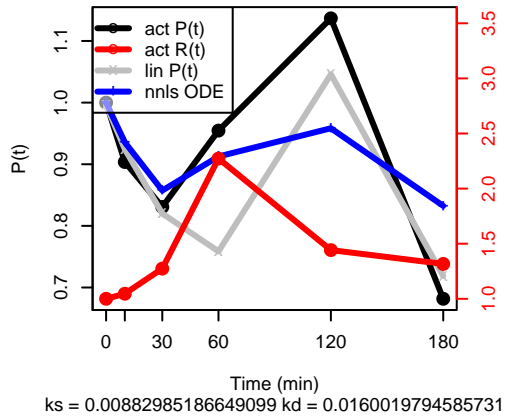

SPCC74.02c

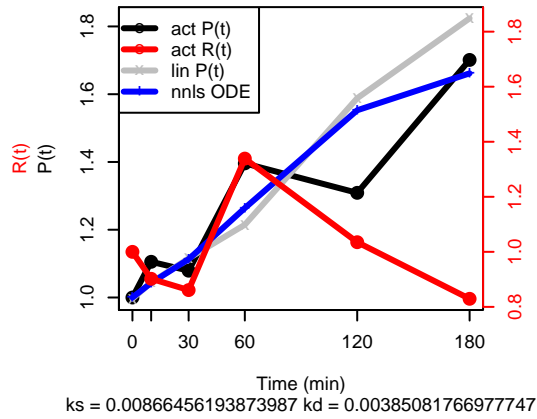

SPCC825.01

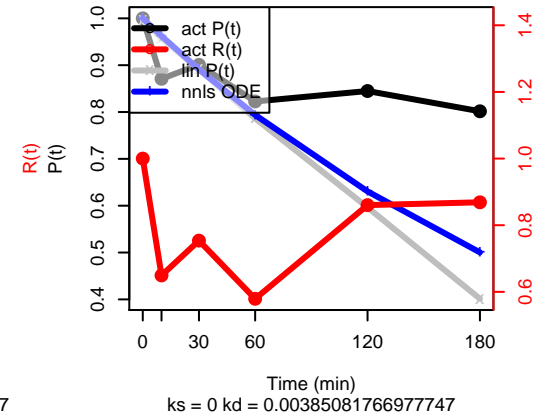

SPCC830.07c

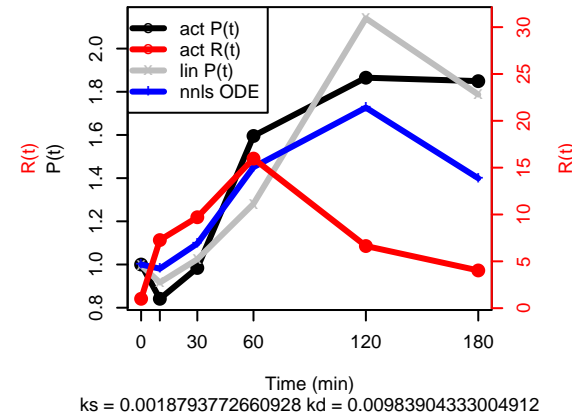

SPAC13C5.01c

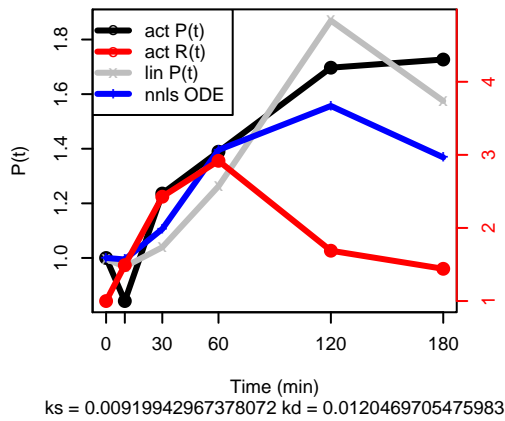

SPAC13G7.02c

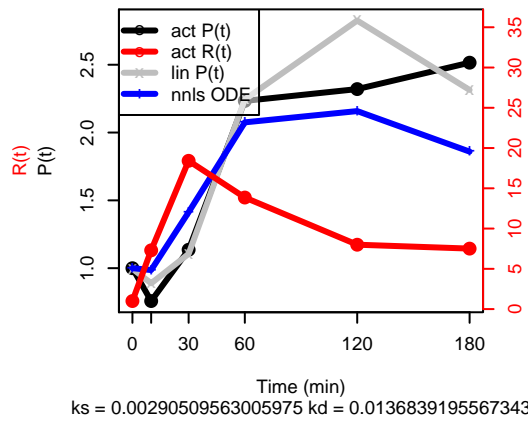

SPAC13G7.06

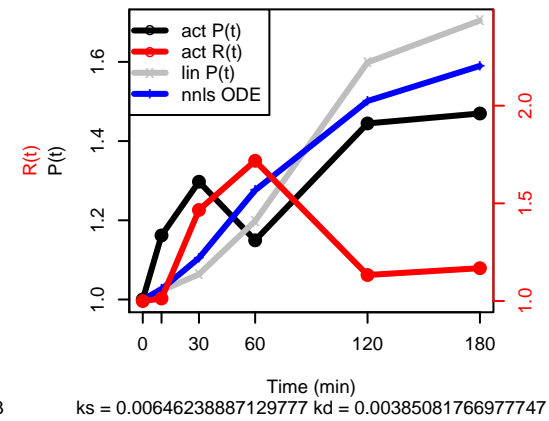

SPAC1556.08c

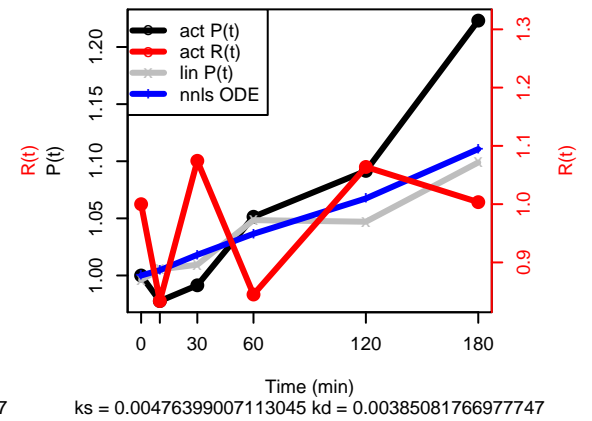

SPAC15F9.03c

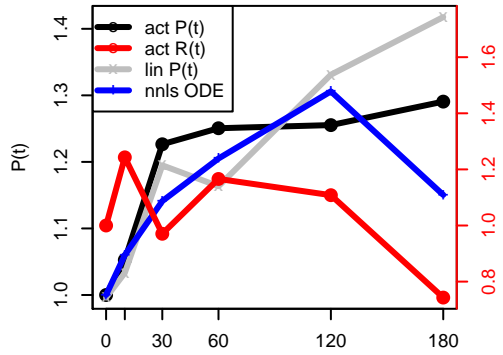

Time (min)  
ks = 0.0218862632296004 kd = 0.0181715175672483

SPAC1687.03c

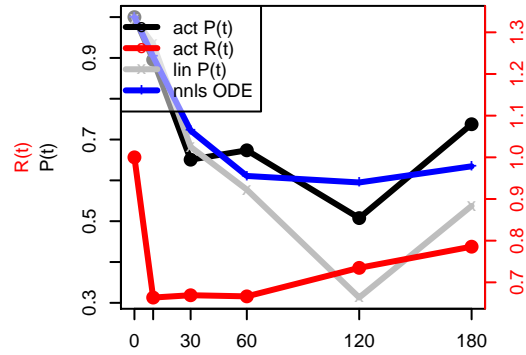

Time (min)  
ks = 0.030358741615618 kd = 0.0365705595468483

SPAC17G6.13

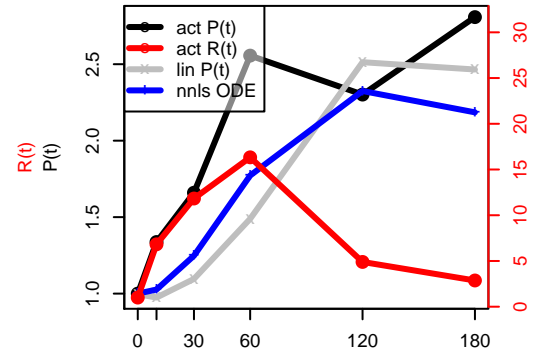

Time (min)  
ks = 0.00164773743639289 kd = 0.00385081766977747

SPAC18G6.07c

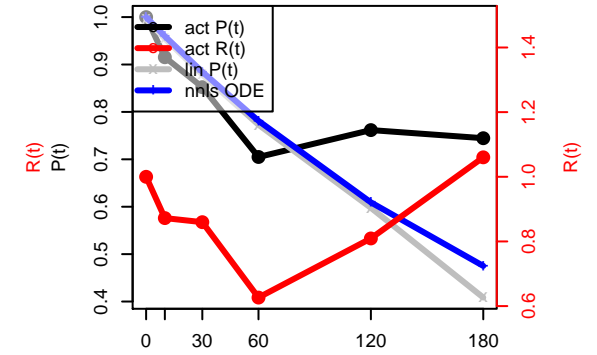

Time (min)  
ks = 0 kd = 0.00414282264466497

SPAC19G12.03

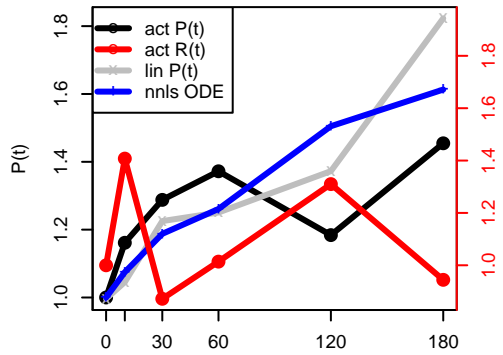

Time (min)  
ks = 0.013235520473703 kd = 0.00830214935788996

SPAC1B9.02c

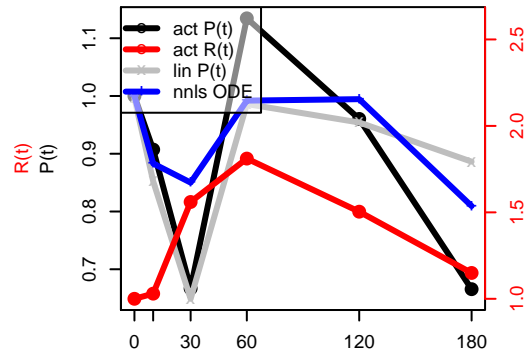

Time (min)  
ks = 0.0233046295829902 kd = 0.037673037681678

SPAC1F7.12

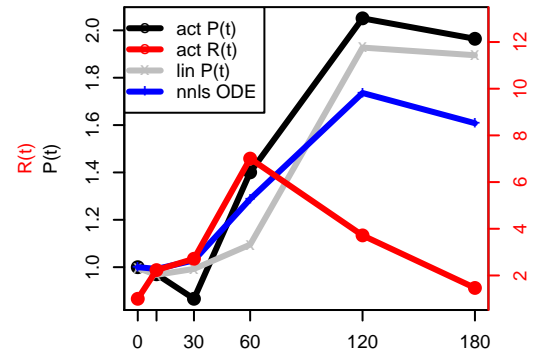

Time (min)  
ks = 0.00318469552675797 kd = 0.00603341752062523

SPAC22F8.05

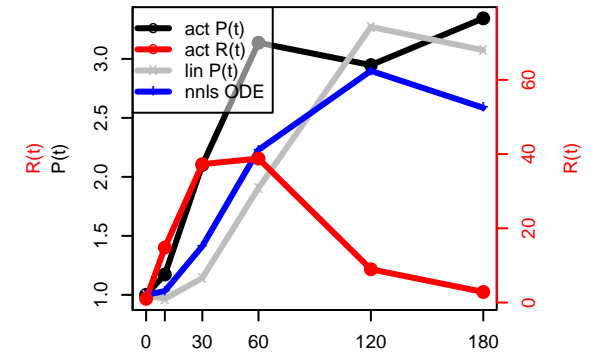

Time (min)  
ks = 0.000898379405775165 kd = 0.00385081766977747

SPAC23A1.03

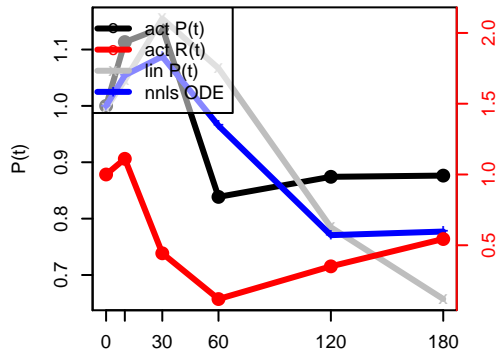

Time (min)  
ks = 0.0123081223013755 kd = 0.00736892608856315

SPAC23A1.14c

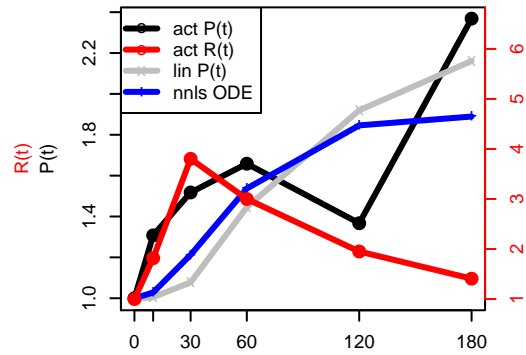

Time (min)  
ks = 0.00476240457667774 kd = 0.00385081766977747

SPAC23C11.13c

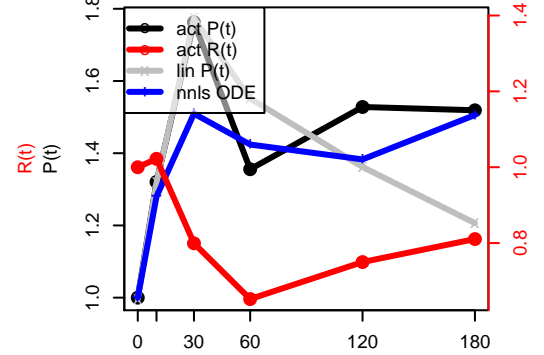

Time (min)  
ks = 0.0666964919957789 kd = 0.0344337917538462

SPAC23C4.14

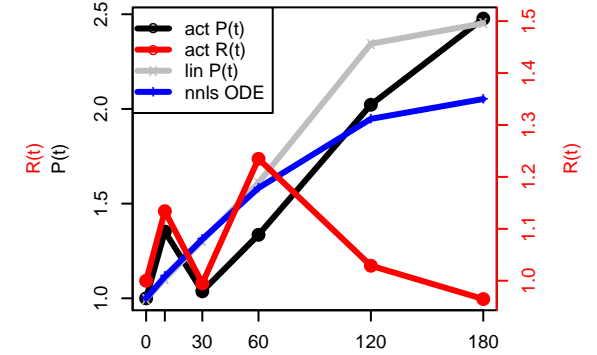

Time (min)  
ks = 0.019869836710589 kd = 0.00921719557052662



SPAC23G3.11

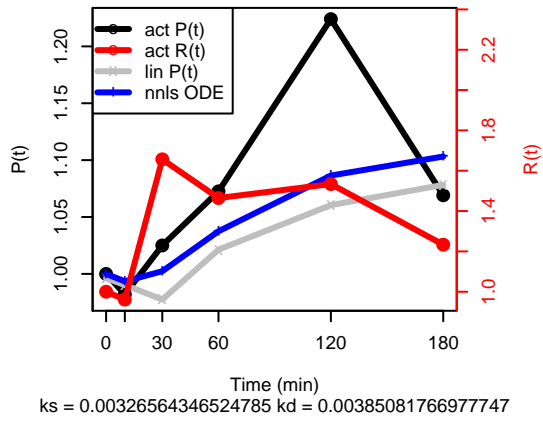

SPAC25H1.08c

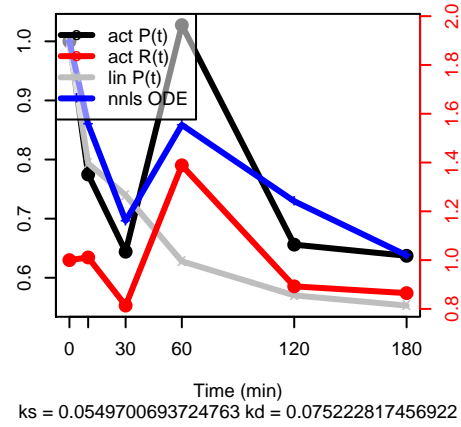

SPAC26A3.16

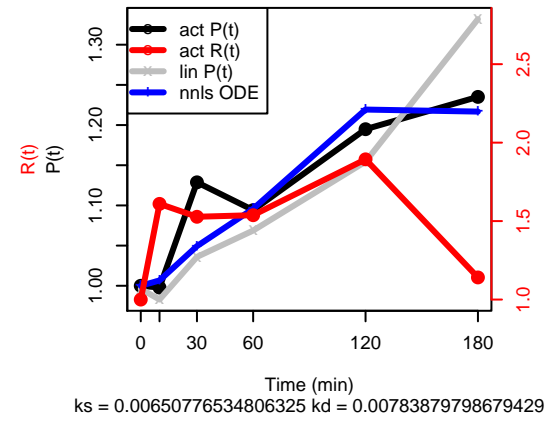

SPAC26A3.17c

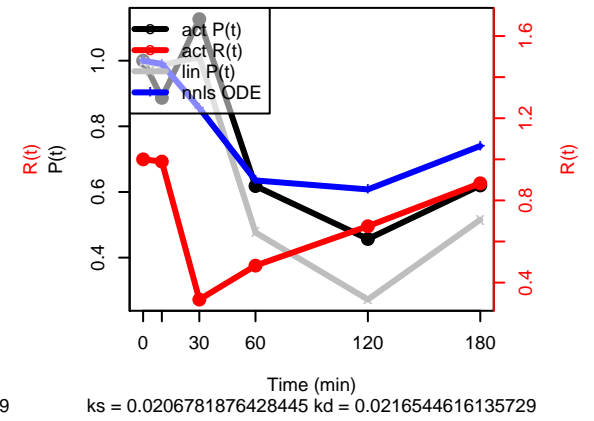

SPAC26F1.13c

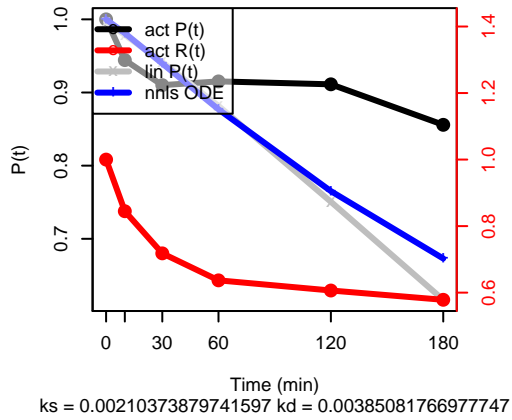

SPAC27D7.02c

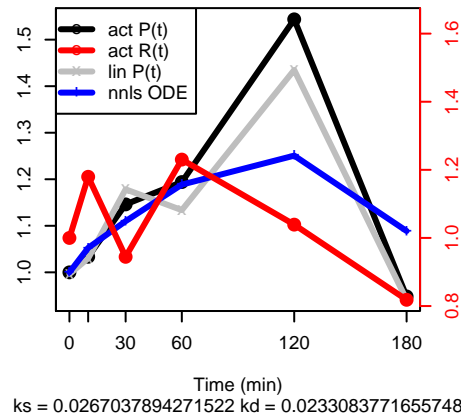

SPAC27F1.09c

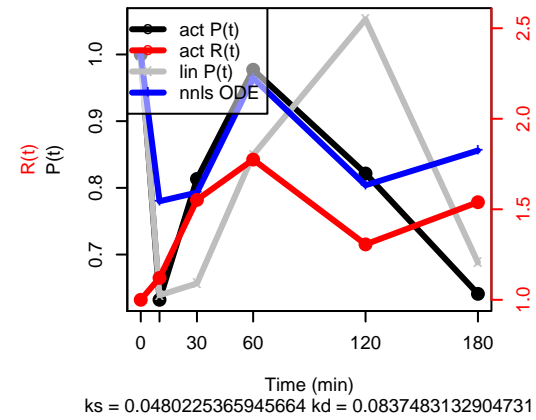

SPAC29A4.15

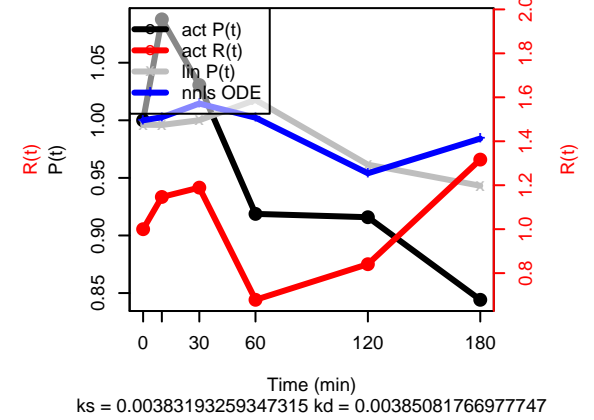

SPAC2F7.16c

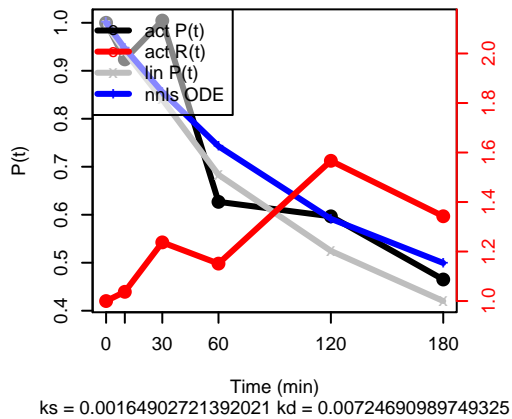

SPAC30.01c

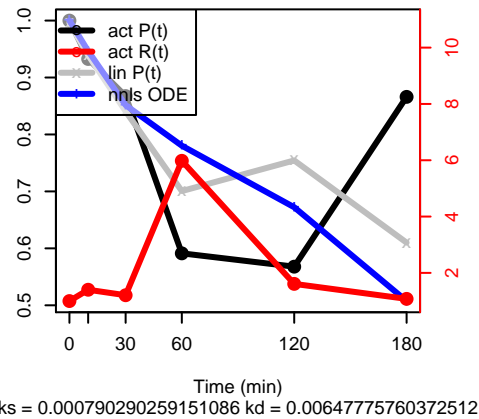

SPAC30C2.08

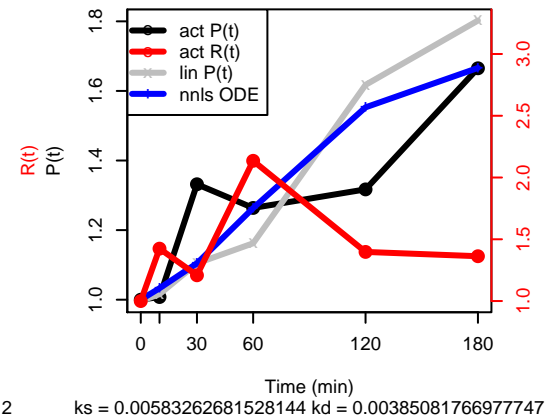

SPAC31G5.13

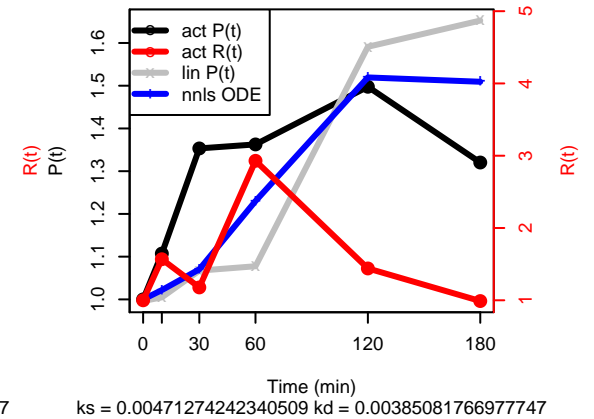

SPAC31G5.16c

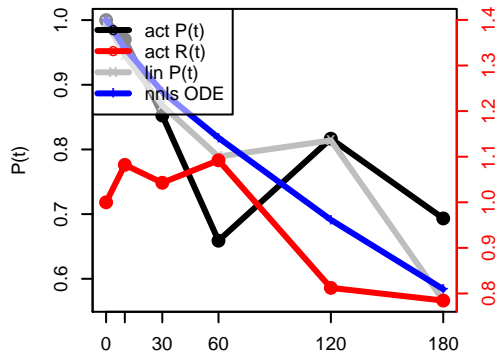

Time (min)  
ks = 0.00858856134055989 kd = 0.0135988913445754

SPAC3A12.10

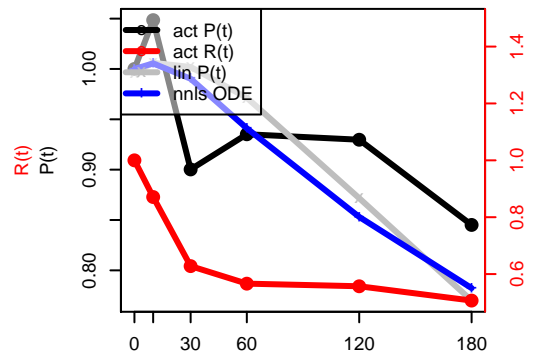

Time (min)  
ks = 0.00702680491222097 kd = 0.00603334343946803

SPAC3H5.09c

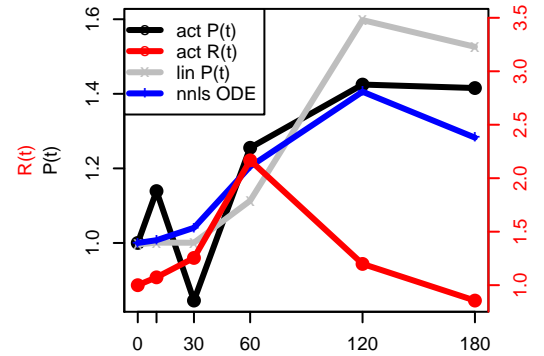

Time (min)  
ks = 0.00821184392614432 kd = 0.00774588543321775

SPAC4A8.04

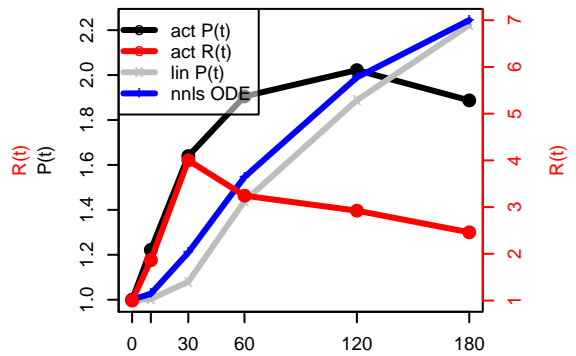

Time (min)  
ks = 0.00456901995486811 kd = 0.00385081766977747

SPAC4F10.02

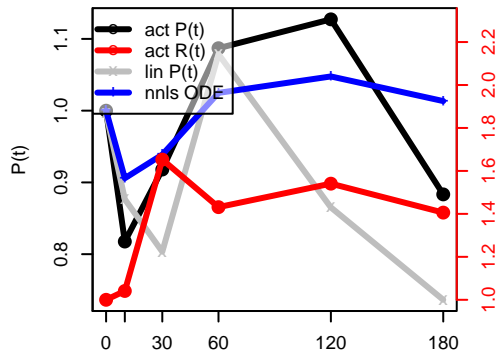

Time (min)  
ks = 0.0274302158043989 kd = 0.0393946121778172

SPAC4G9.15

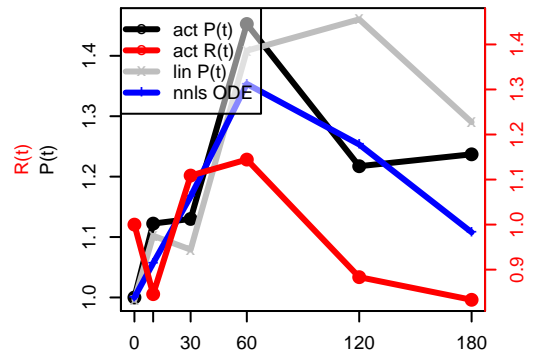

Time (min)  
ks = 0.0471310234980119 kd = 0.0365331875948156

SPAC57A10.12c

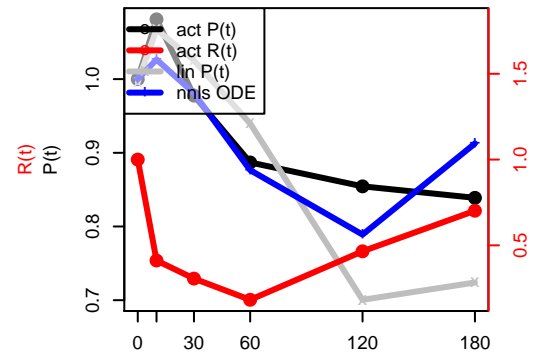

Time (min)  
ks = 0.0146250629977825 kd = 0.00750658022692671

SPAC607.05

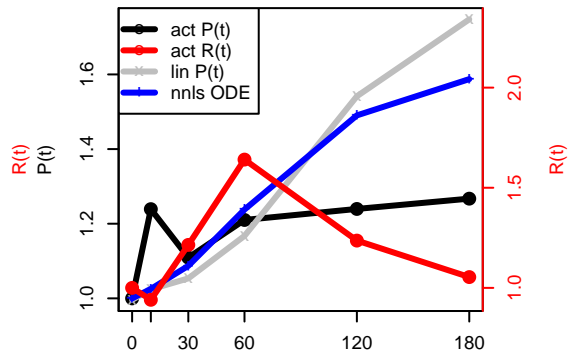

Time (min)  
ks = 0.00664034139551065 kd = 0.00385081766977747

SPAC644.16

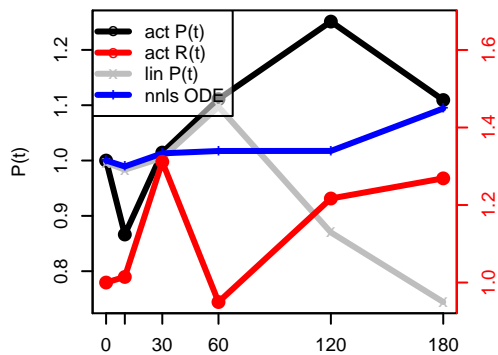

Time (min)  
ks = 0.0147146018399178 kd = 0.0159872405038272

SPAC664.02c

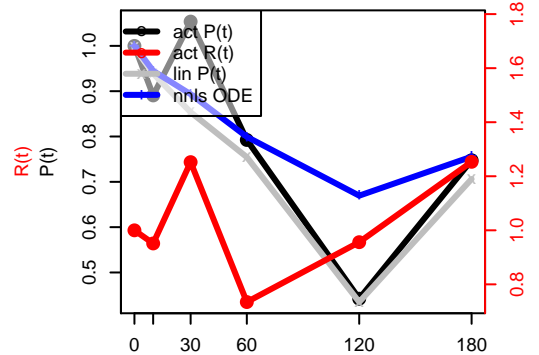

Time (min)  
ks = 0.0137287923775733 kd = 0.01945230503166

SPAC6C3.08

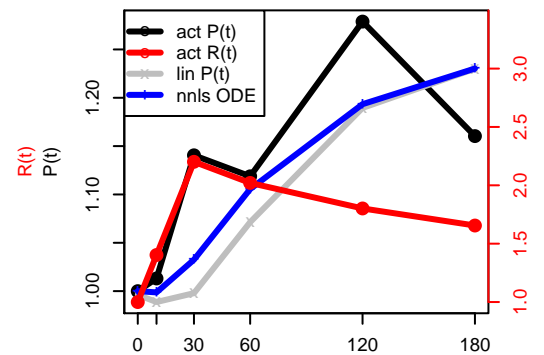

Time (min)  
ks = 0.00310724818767969 kd = 0.00385081766977747

SPAC6F12.06

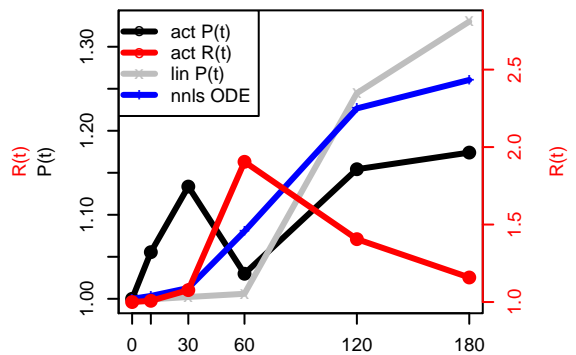

Time (min)  
ks = 0.0041712311878776 kd = 0.00385081766977747

SPAC6G10.08

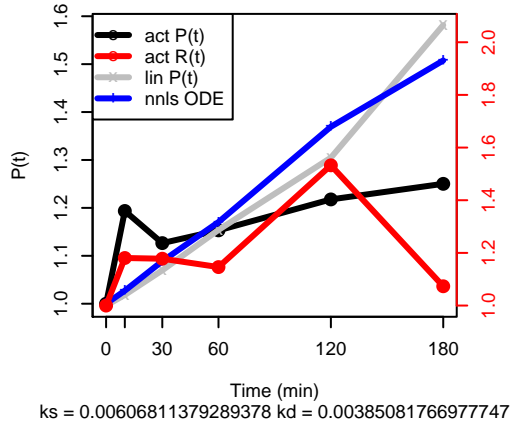

SPAC869.02c

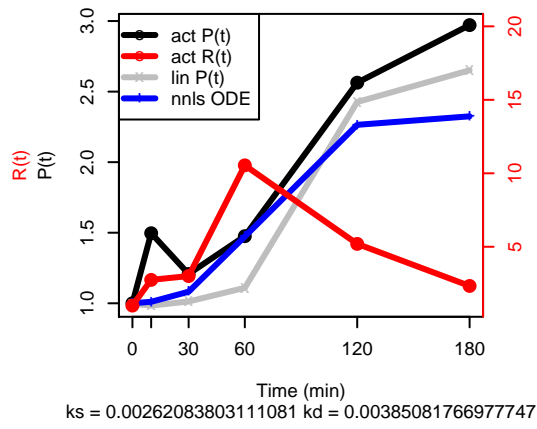

SPAC890.02c

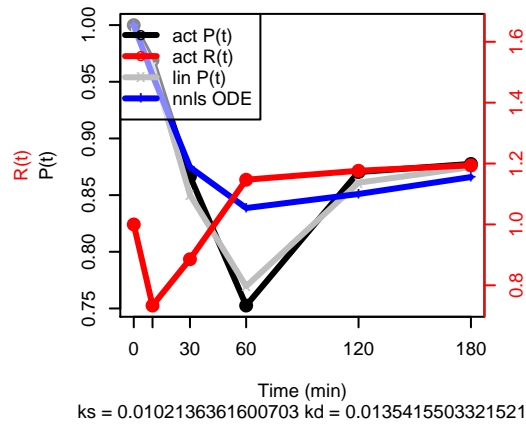

SPACUNK4.10

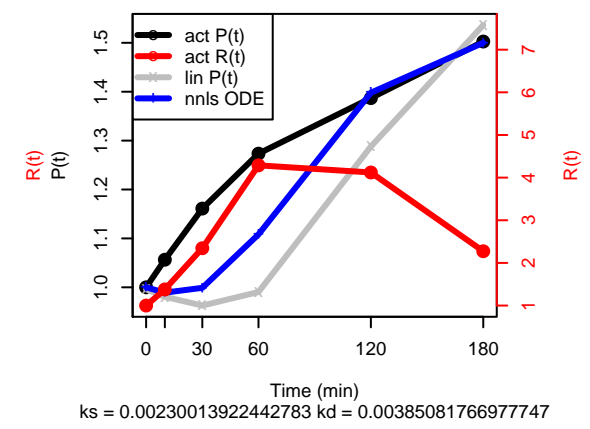

SPACUNK4.15

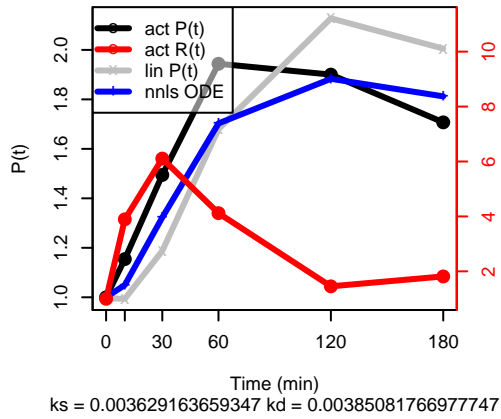

SPACUNK4.16c

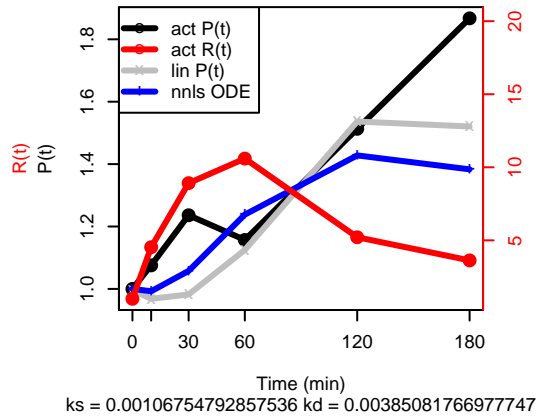

SPAP8A3.12c

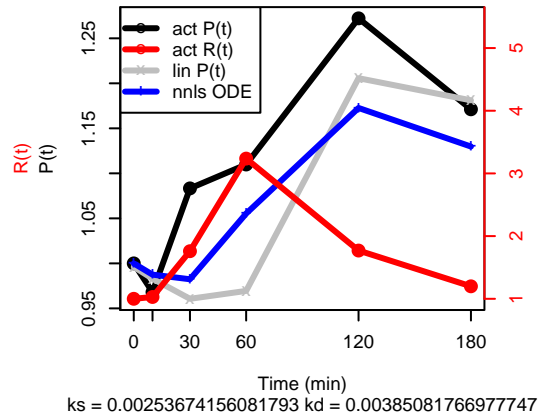

SPAPB1A10.12c

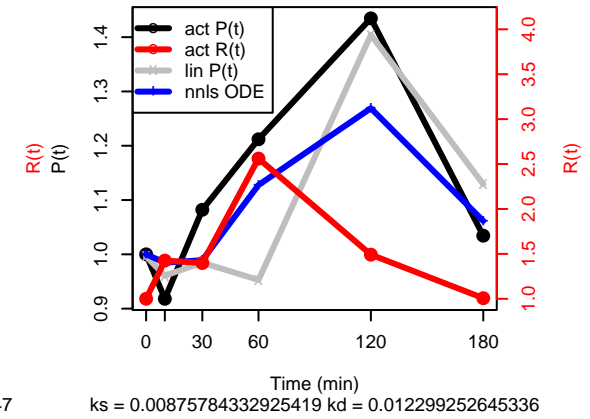

SPAPB24D3.09c

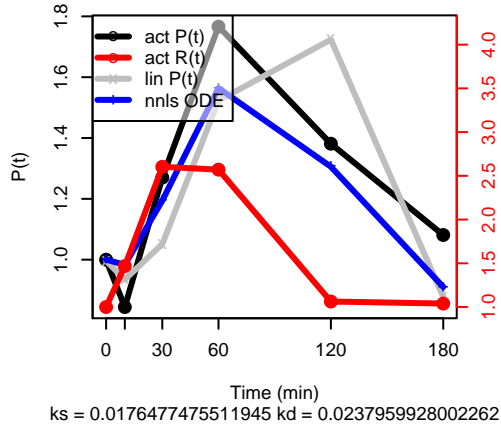

SPAPYUG7.05

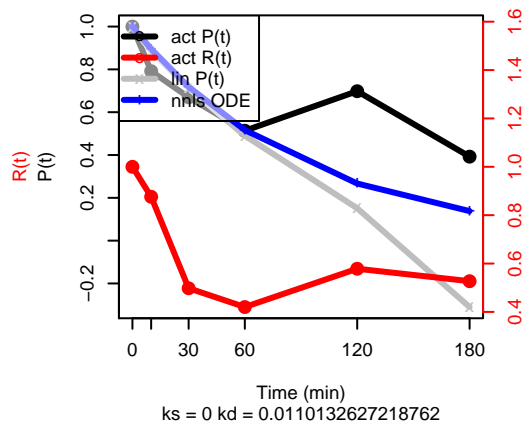

SPBC106.16

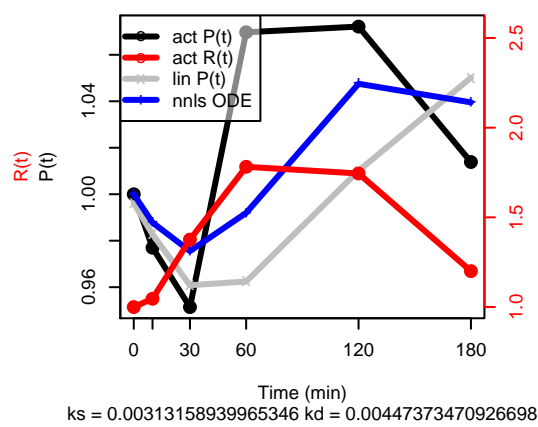

SPBC11B10.07c

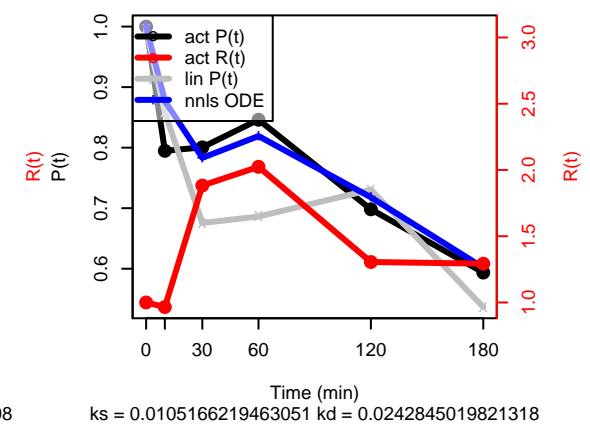

SPBC11G11.06c

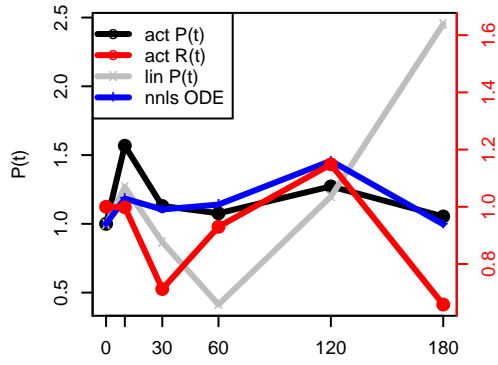

ks = 0.10957883809349 kd = 0.0825036633937218

SPBC146.12

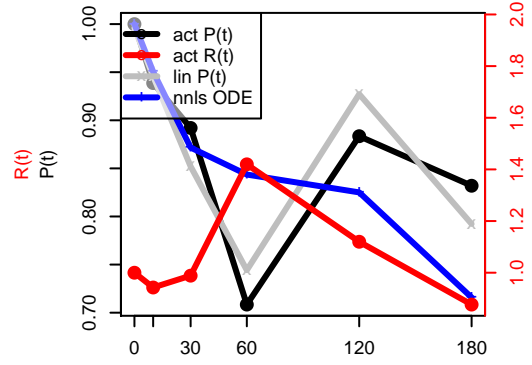

ks = 0.00930345531827805 kd = 0.0143385527027082

SPBC1677.03c

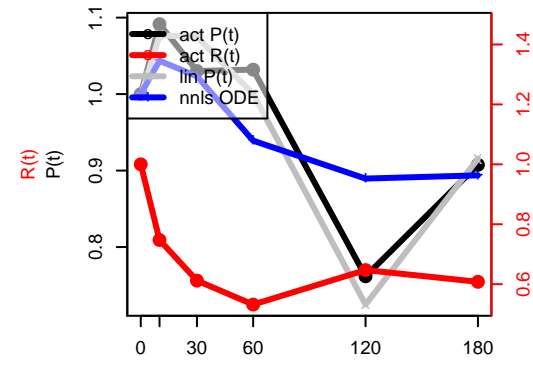

ks = 0.0257850688142701 kd = 0.0177367931239195

SPBC1685.09

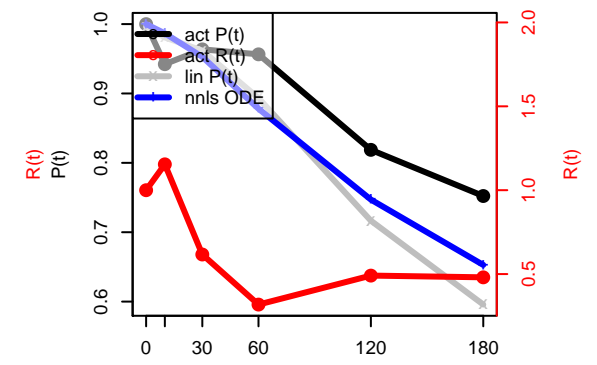

ks = 0.00231827154889555 kd = 0.00385081766977747

SPBC16C6.13c

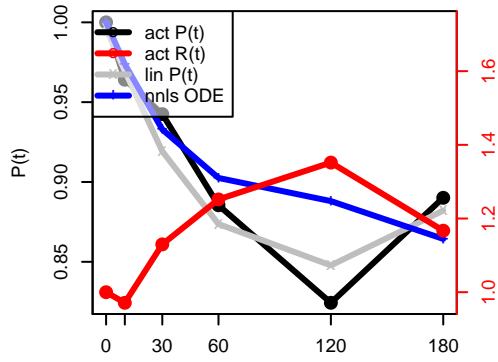

ks = 0.00522874857974702 kd = 0.00788076408527964

SPBC16D10.09

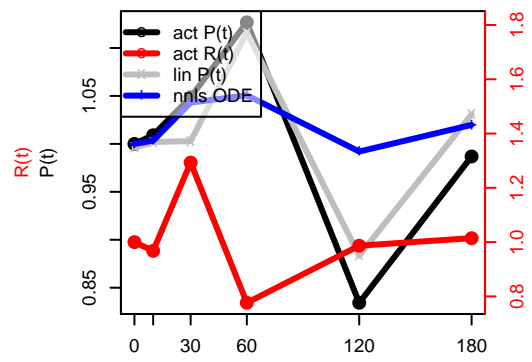

ks = 0.0129214224096841 kd = 0.0123416390792036

SPBC16E9.11c

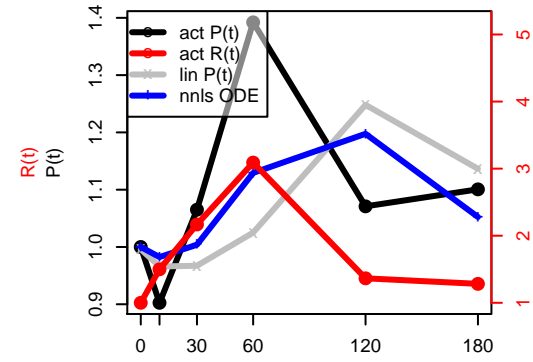

ks = 0.00466047549309486 kd = 0.00767614539147851

SPBC1709.02c

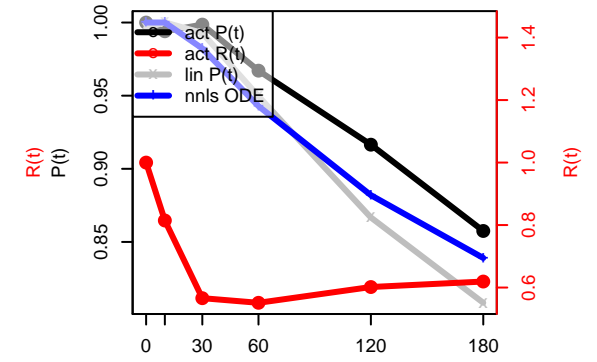

ks = 0.00424955829064907 kd = 0.00385081766977747

SPBC1709.05

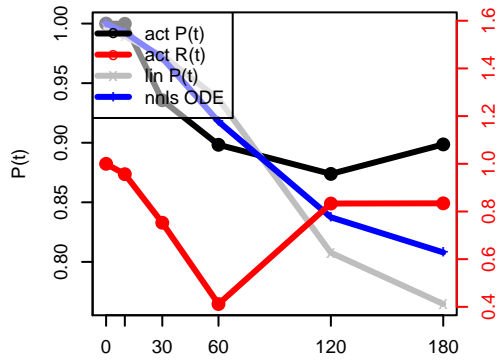

ks = 0.00317592628764949 kd = 0.00385081766977747

SPBC1773.01

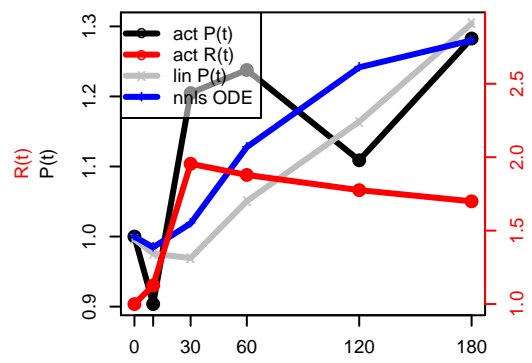

ks = 0.00691373593546305 kd = 0.00896844929502832

SPBC1773.07c

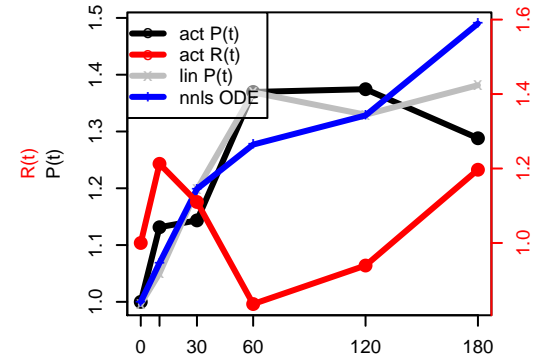

ks = 0.0151512733446661 kd = 0.009725417066189

SPBC18H10.02

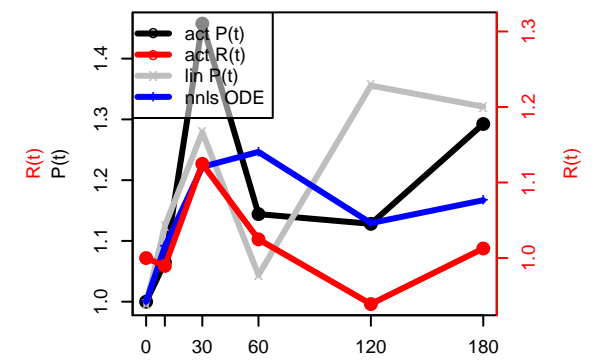

ks = 0.0798632552231463 kd = 0.0669933534824277

SPBC1A4.02c

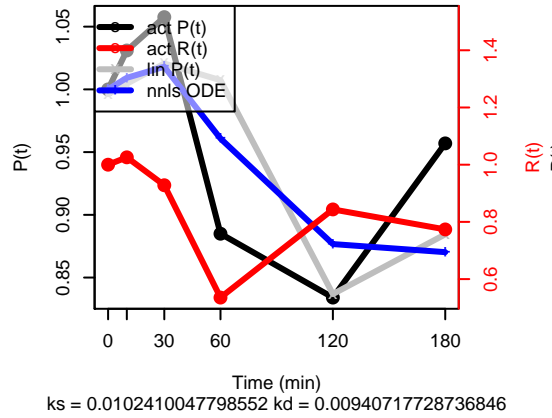

SPBC1A4.09

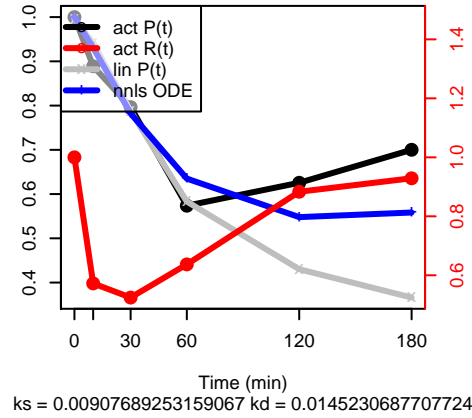

SPBC21C3.12c

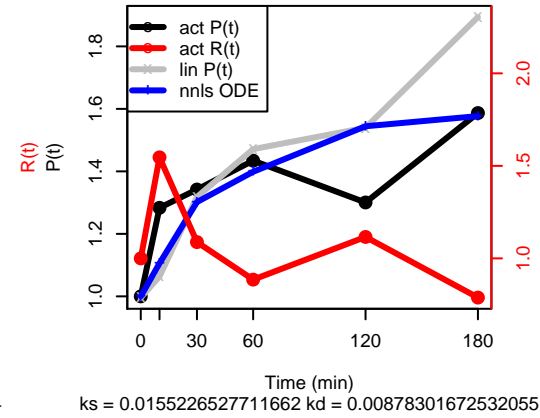

SPBC23E6.02

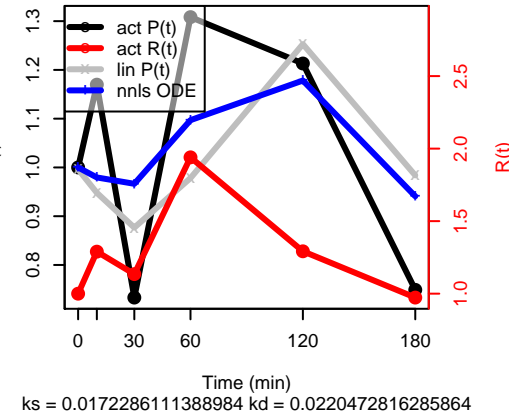

SPBC26H8.08c

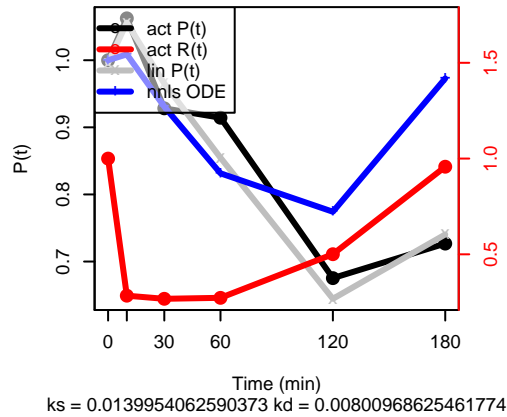

SPBC29A10.12

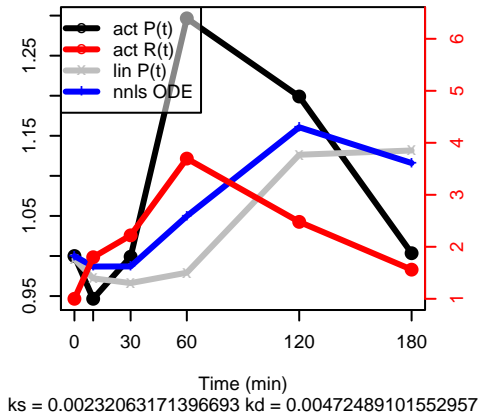

SPBC29A3.09c

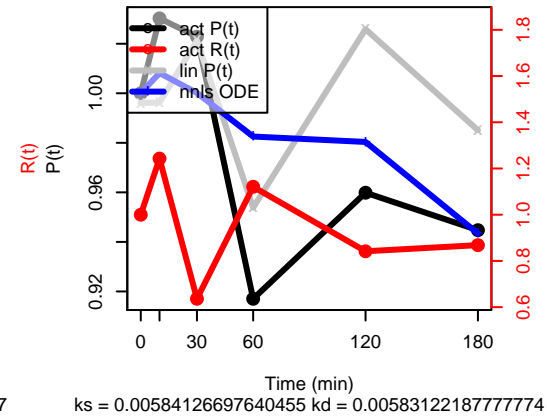

SPBC30D10.10c

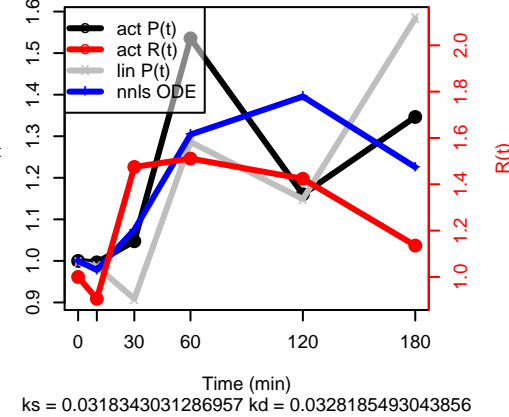

SPBC30D10.14

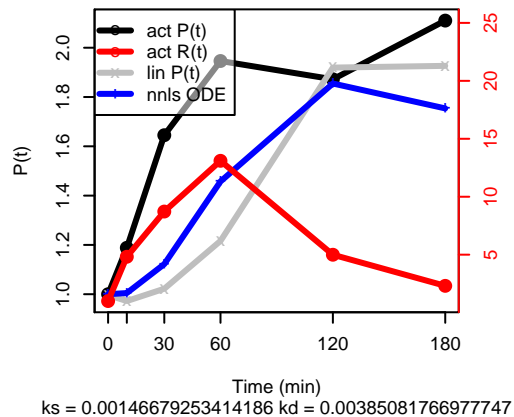

SPBC32F12.10

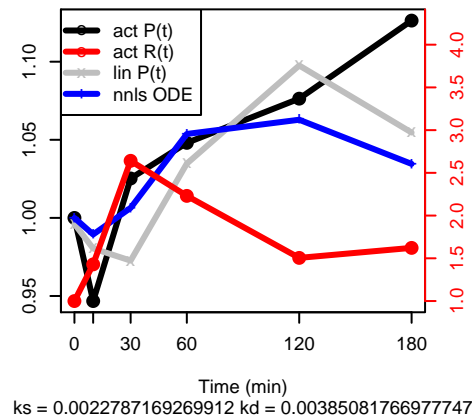

SPBC342.04

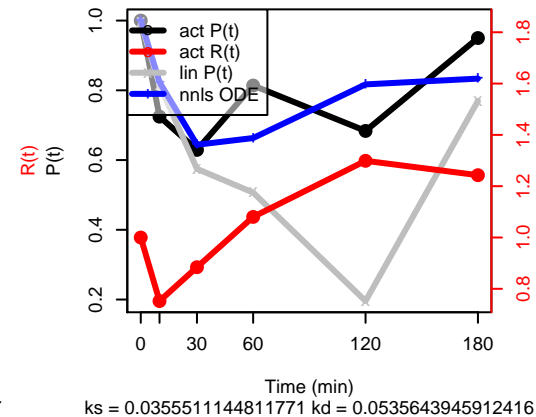

SPBC4.07c

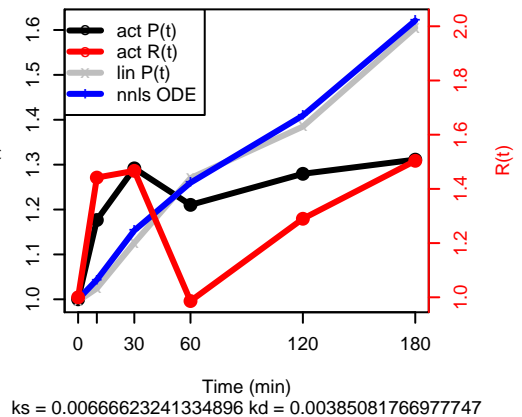

SPBC428.10

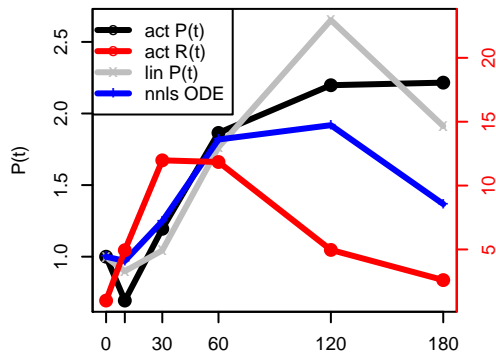

Time (min)  
ks = 0.003311426930435 kd = 0.0130981612486115

SPBC4B4.04

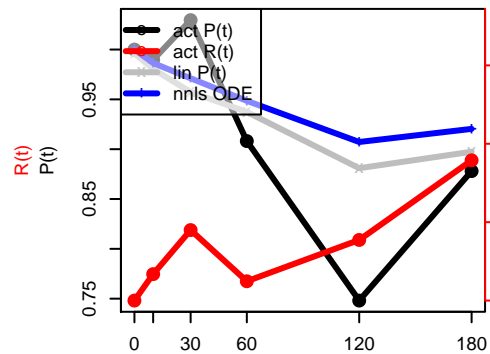

Time (min)  
ks = 0.00227563331482653 kd = 0.00385081766977747

SPBC83.02c

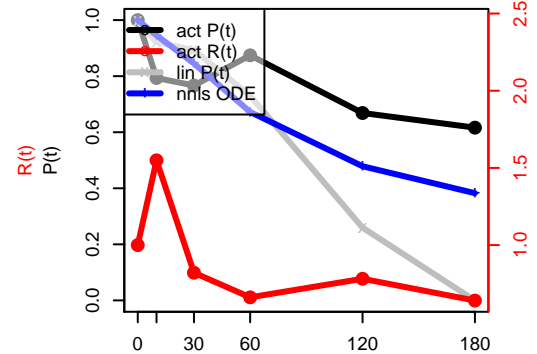

Time (min)  
ks = 0.00600234103948326 kd = 0.0135063625681183

SPBC83.13

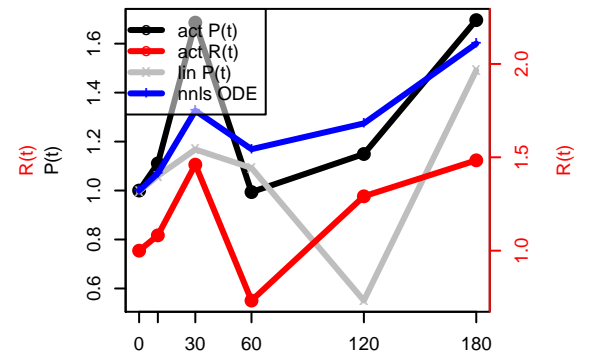

Time (min)  
ks = 0.0588581667187316 kd = 0.0524872669021972

SPBC839.13c

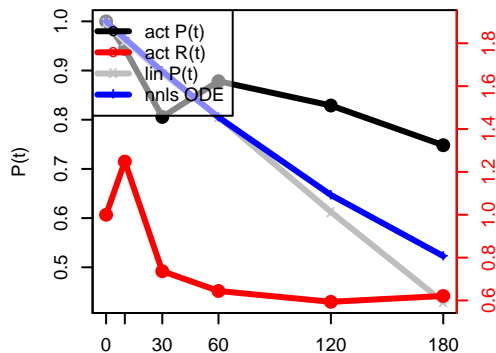

Time (min)  
ks = 0.000246824030053869 kd = 0.00385081766977747

SPBC887.12

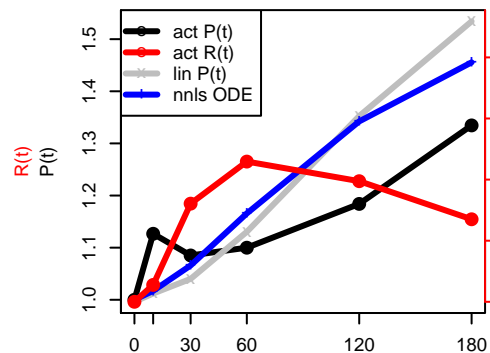

Time (min)  
ks = 0.00543996818768835 kd = 0.00385081766977747

SPBC887.17

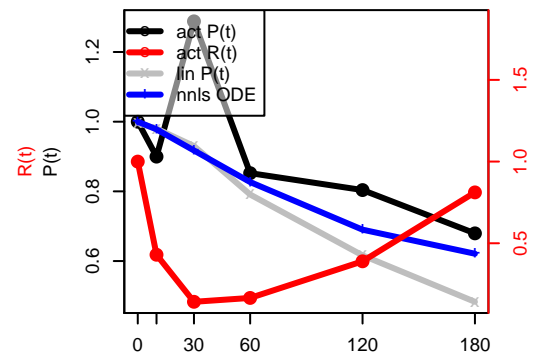

Time (min)  
ks = 0.00224698713183359 kd = 0.00385081766977747

SPBC8D2.10c

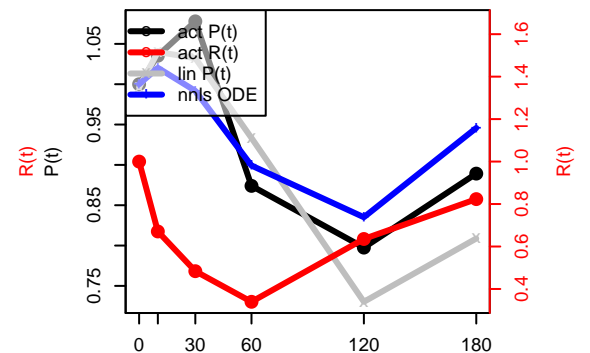

Time (min)  
ks = 0.0135022434068697 kd = 0.00911939211455637

SPBC8D2.18c

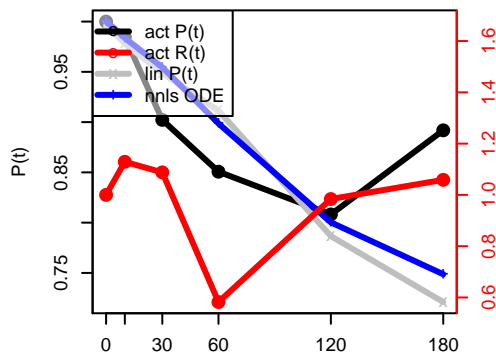

Time (min)  
ks = 0.00205266514360961 kd = 0.00385081766977747

SPBC902.05c

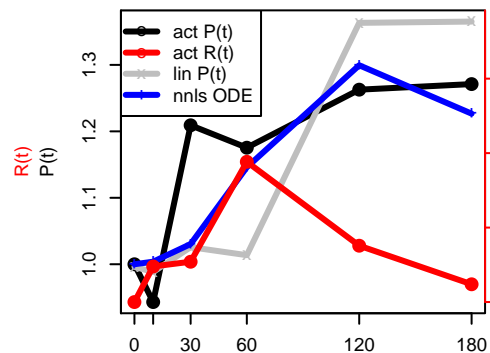

Time (min)  
ks = 0.00880095348418691 kd = 0.00958082430092118

SPBP22H7.02c

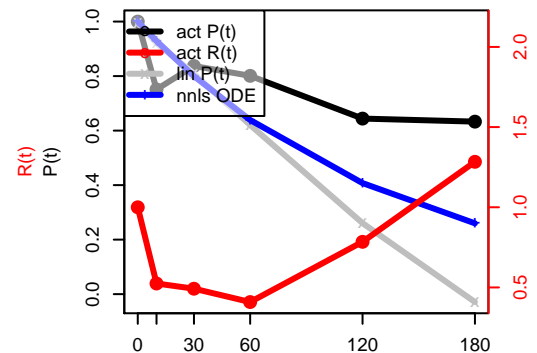

Time (min)  
ks = 0 kd = 0.00749118242280746

SPBP4H10.04

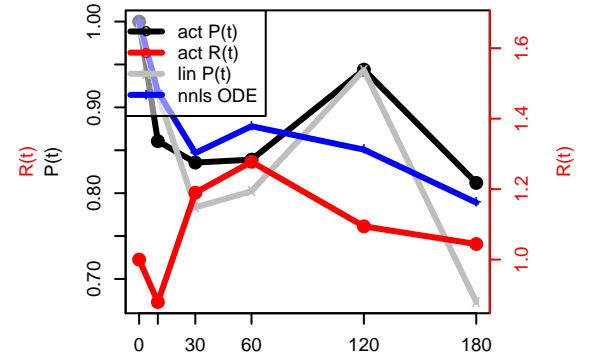

Time (min)  
ks = 0.0208845923881439 kd = 0.0289873520230375

SPBP8B7.06

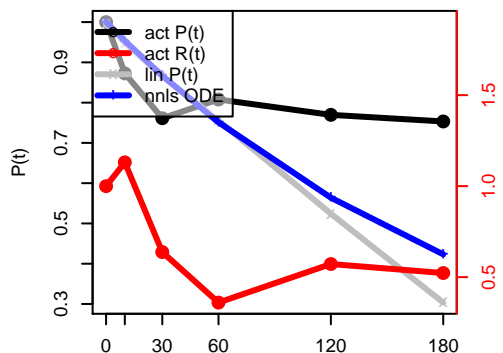

Time (min)  
ks = 0 kd = 0.00477848648681793

SPCC1322.16

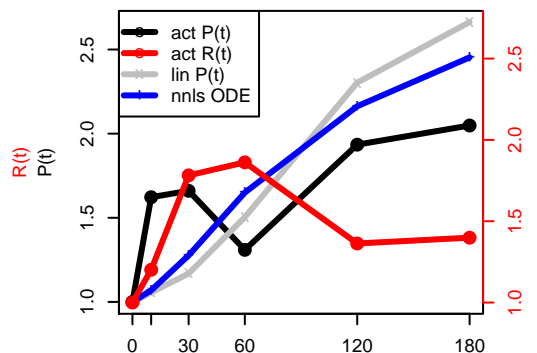

Time (min)  
ks = 0.00986281475420909 kd = 0.00385081766977747

SPCC1450.04

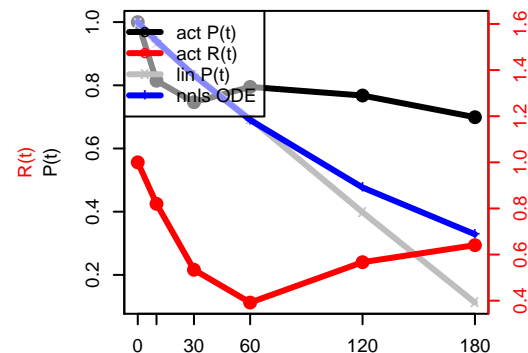

Time (min)  
ks = 0 kd = 0.00620410104369224

SPCC162.09c

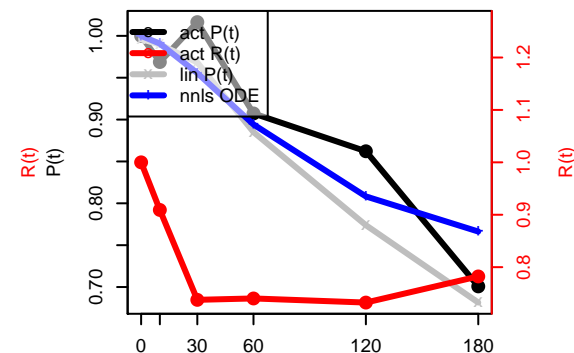

Time (min)  
ks = 0.00759807389421253 kd = 0.00824104044793238

SPCC1672.07

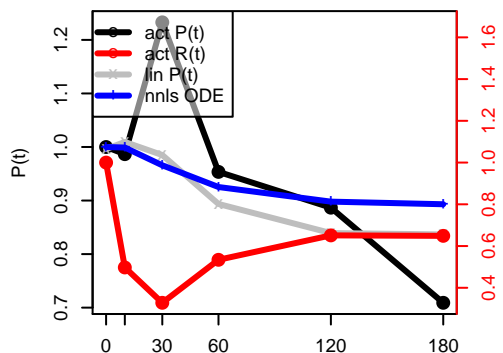

Time (min)  
ks = 0.00518001940958634 kd = 0.00385081766977747

SPCC1682.16

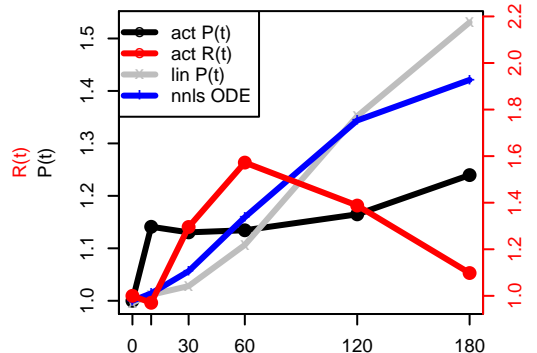

Time (min)  
ks = 0.00537986522119135 kd = 0.00385081766977747

SPCC1739.09c

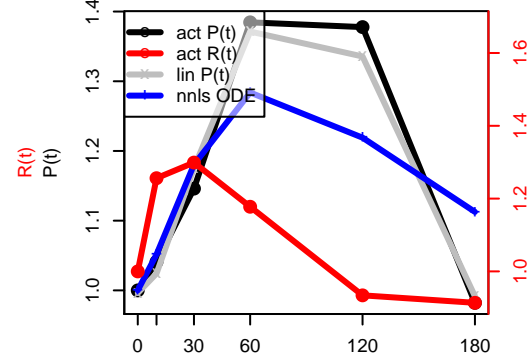

Time (min)  
ks = 0.021636222705333 kd = 0.0188330585164214

SPCC18.05c

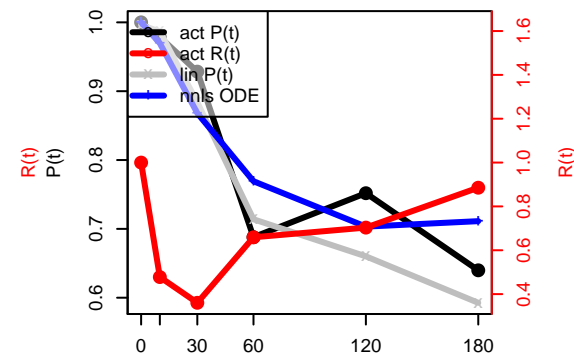

Time (min)  
ks = 0.00840396314721517 kd = 0.00935832583156335

SPCC18.16c

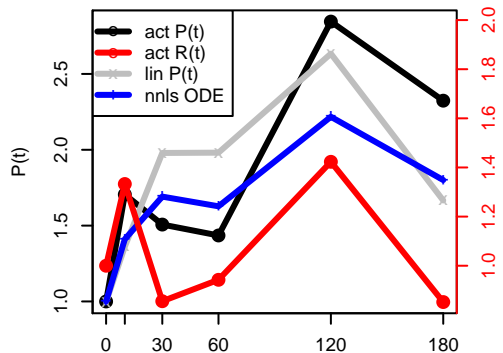

Time (min)  
ks = 0.0844701582489971 kd = 0.0479171037574672

SPCC1840.07c

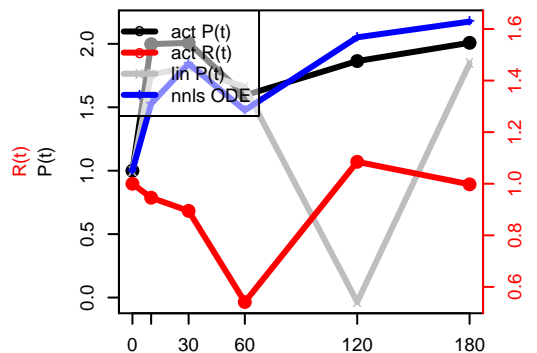

Time (min)  
ks = 0.142348612657872 kd = 0.0660378988916391

SPCC31H12.08c

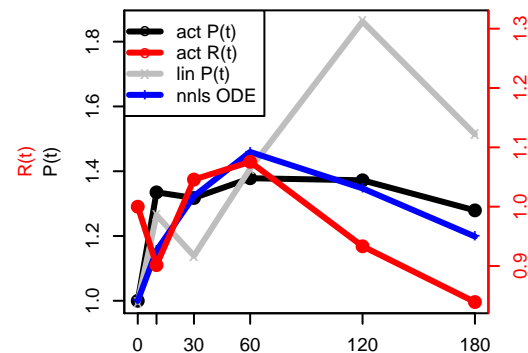

Time (min)  
ks = 0.0971016976552449 kd = 0.0702796968721076

SPCC4F11.02

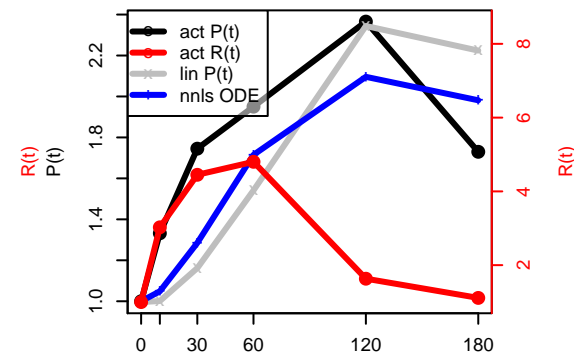

Time (min)  
ks = 0.00435141435734664 kd = 0.00385081766977747



SPCC550.11

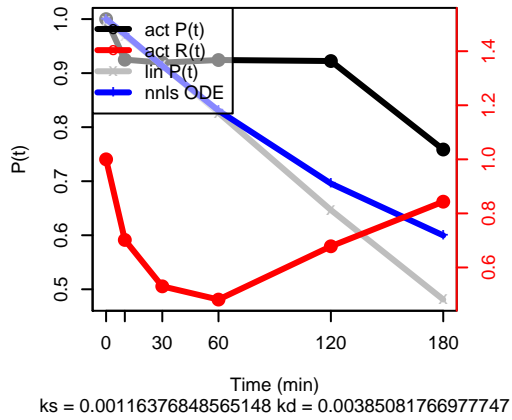

SPCC576.03c

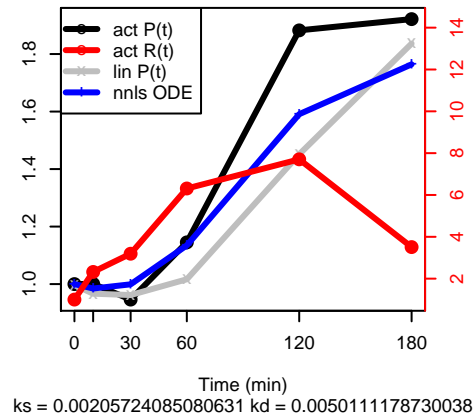

SPCC663.04

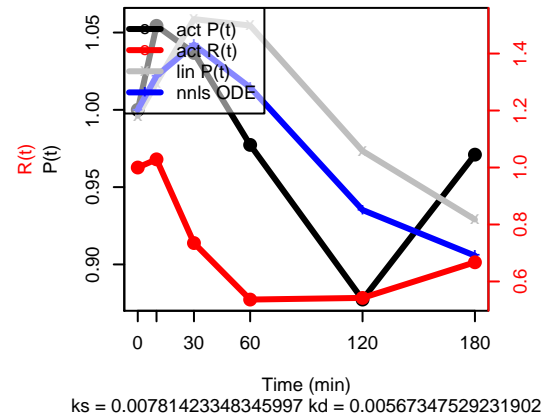

SPCC74.05

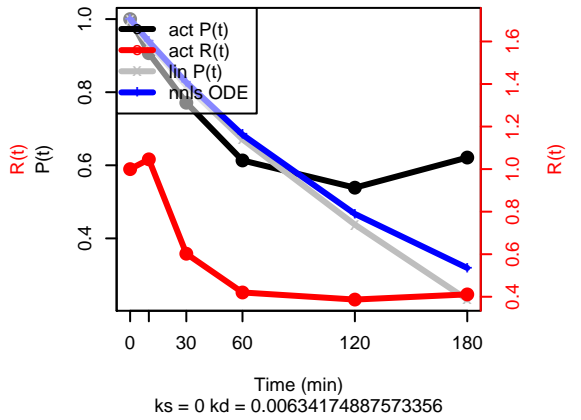

SPCC794.12c

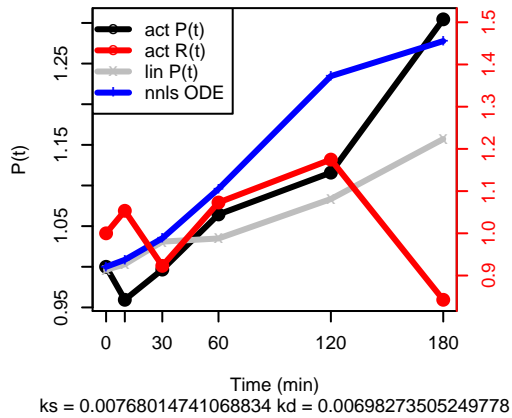

SPCC830.08c

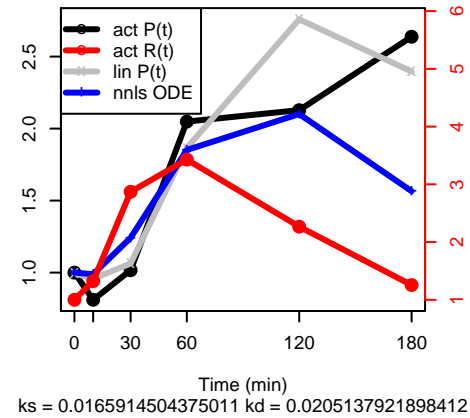

SPAC1006.07

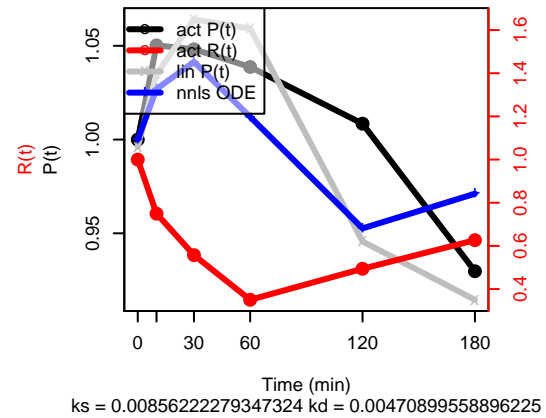

SPAC1071.10c

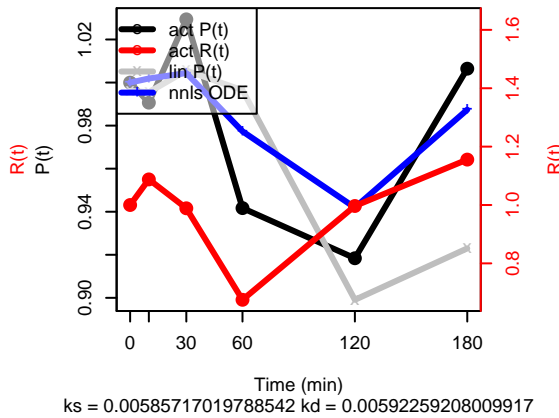

SPAC11D3.04c

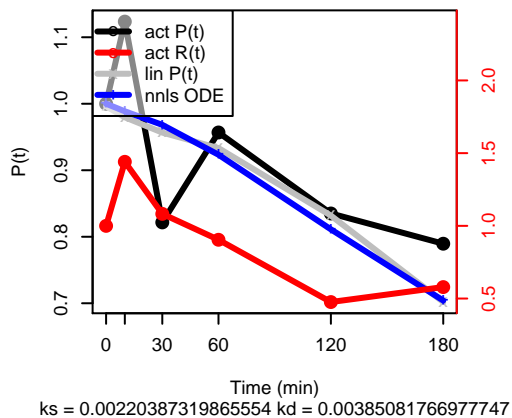

SPAC11E3.02c

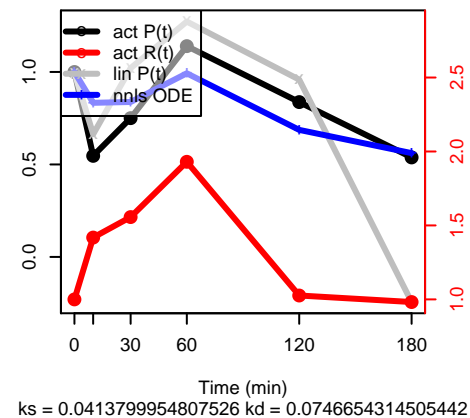

SPAC139.02c

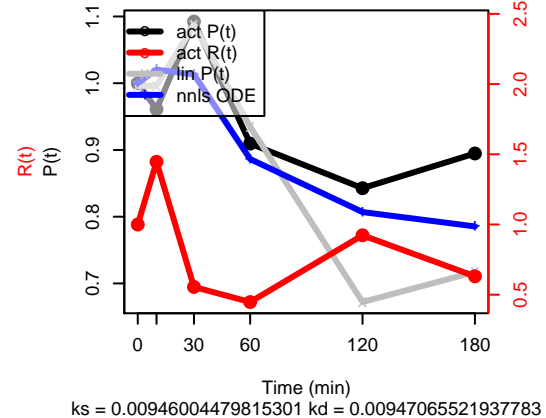

SPAC13G6.02c

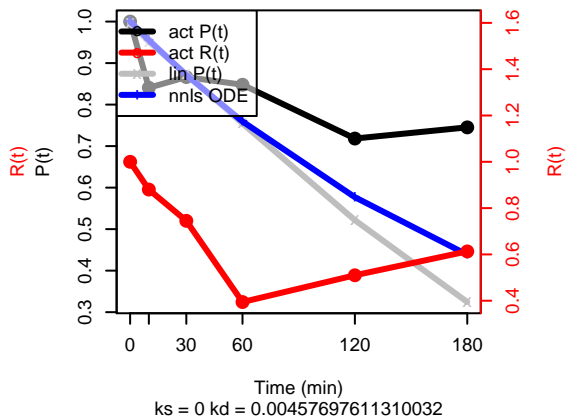

SPAC1486.06

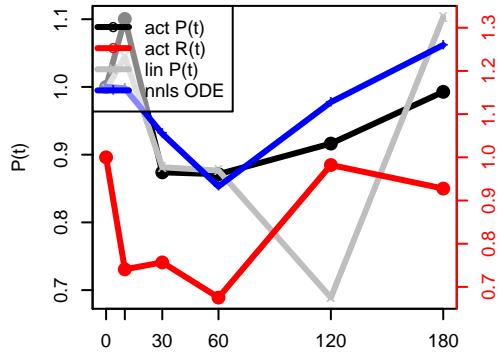

Time (min)  
ks = 0.0374834574206824 kd = 0.0326457443724937

SPAC16E8.06c

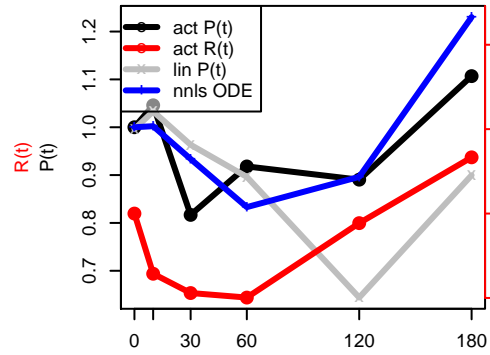

Time (min)  
ks = 0.0182812836091319 kd = 0.0145819045763185

SPAC1783.08c

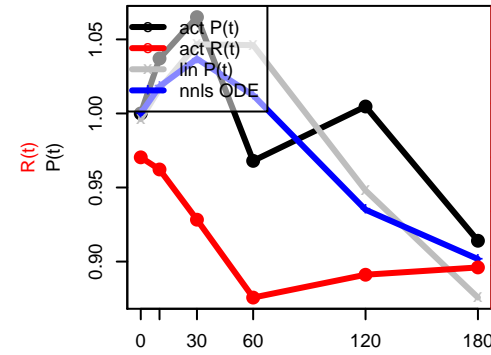

Time (min)  
ks = 0.00739905463441669 kd = 0.00535989568788546

SPAC17C9.12

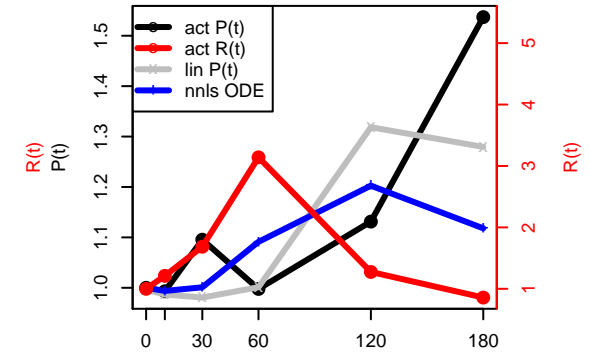

Time (min)  
ks = 0.00290781938807505 kd = 0.00385081766977747

SPAC17G6.11c

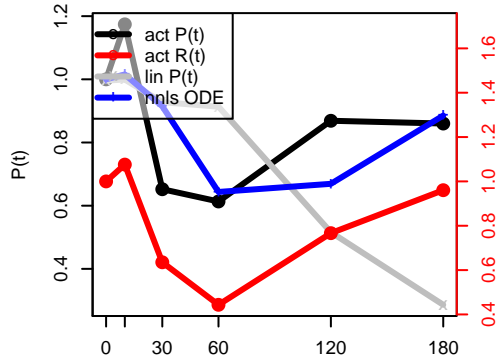

Time (min)  
ks = 0.0401245680444865 kd = 0.0398155558387968

SPAC19G12.15c

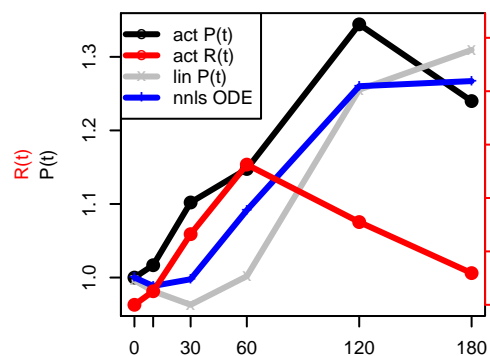

Time (min)  
ks = 0.00238387376588101 kd = 0.00385081766977747

SPAC1B3.06c

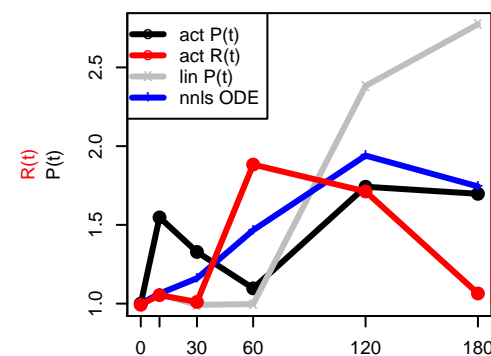

Time (min)  
ks = 0.0264883974252085 kd = 0.0201271847712035

SPAC222.11

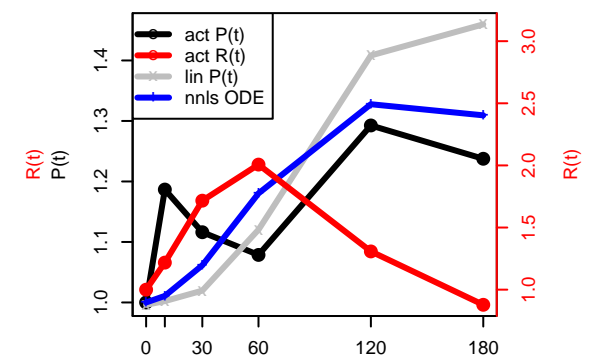

Time (min)  
ks = 0.00446123651012605 kd = 0.00385081766977747

SPAC222.14c

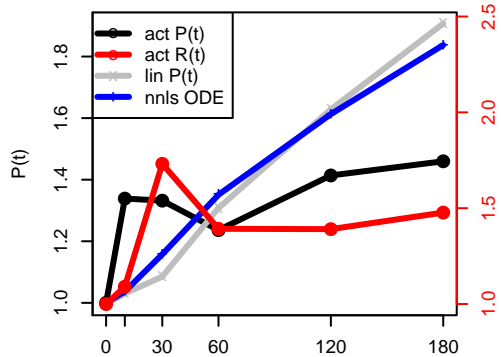

Time (min)  
ks = 0.00725268944835383 kd = 0.00385081766977747

SPAC227.13c

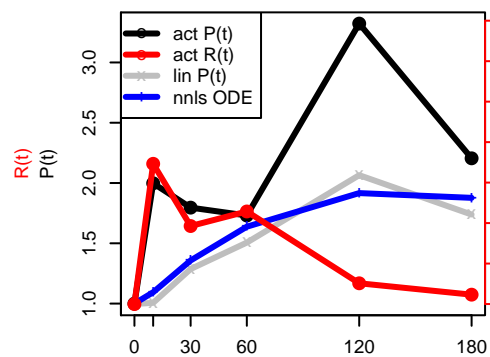

Time (min)  
ks = 0.00486183483236162 kd = 0.00385081766977747

SPAC22A12.12c

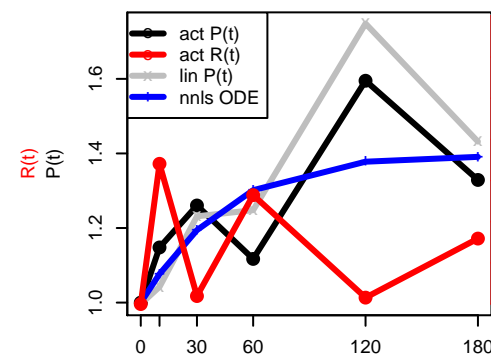

Time (min)  
ks = 0.021752122650375 kd = 0.0171572142141175

SPAC22F8.04

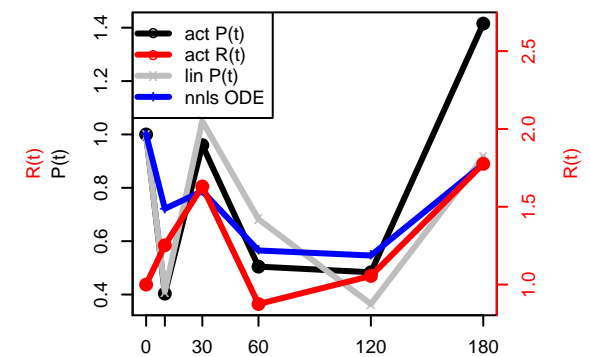

Time (min)  
ks = 0.0654678017052817 kd = 0.123999581411851

SPAC22H12.02

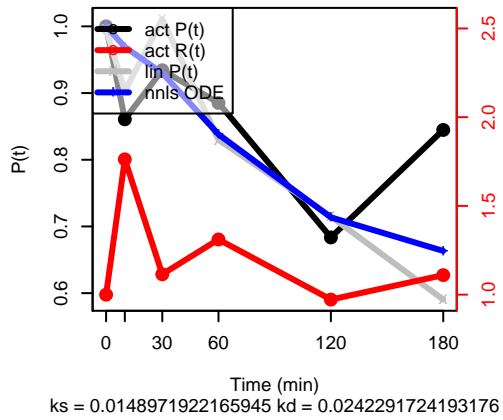

SPAC23C11.03

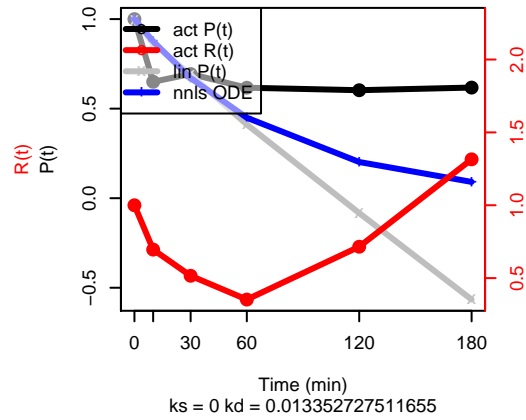

SPAC23G3.06

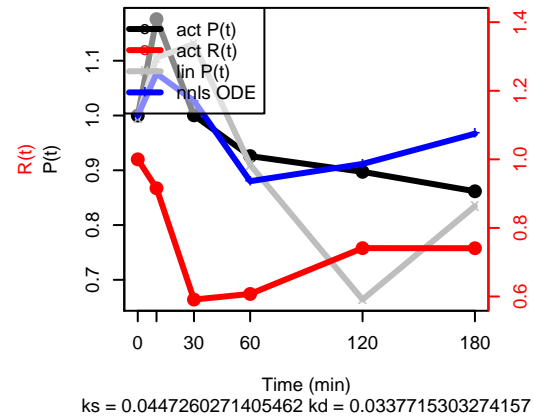

SPAC23H3.07c

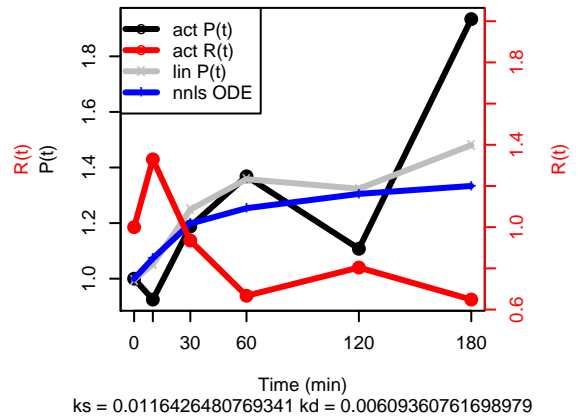

SPAC24C9.03

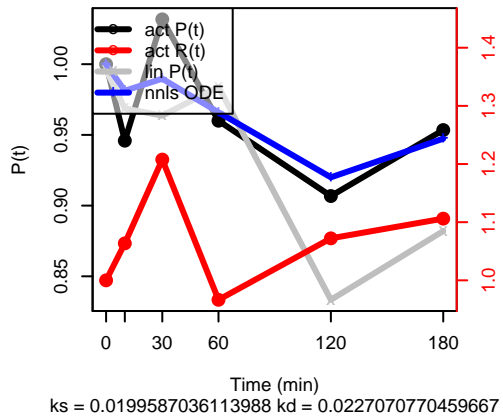

SPAC24C9.05c

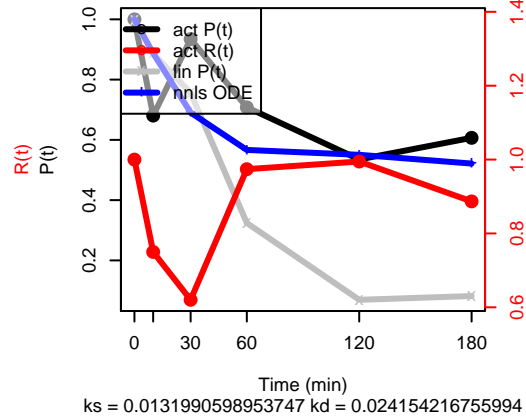

SPAC27E2.03c

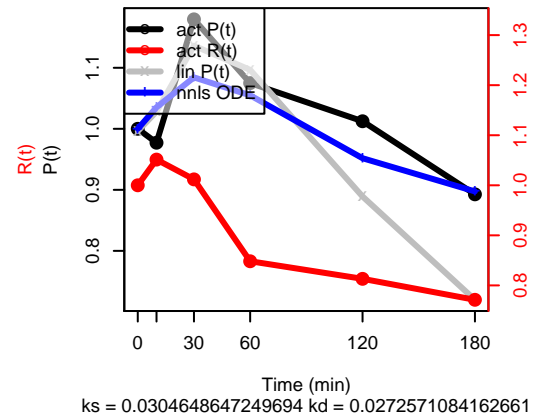

SPAC29A4.02c

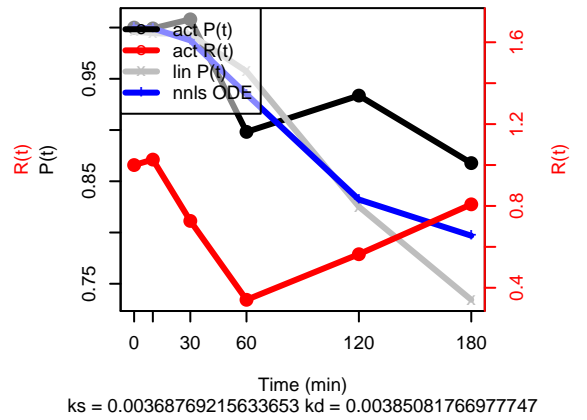

SPAC2C4.15c

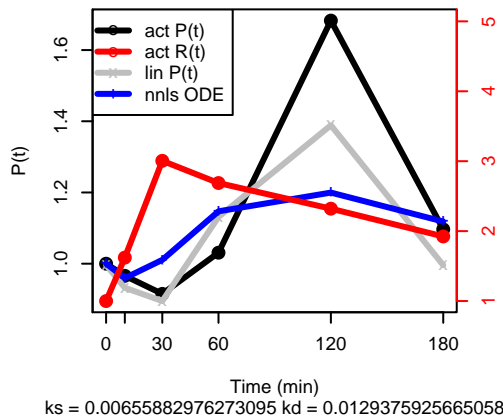

SPAC2E1P3.04

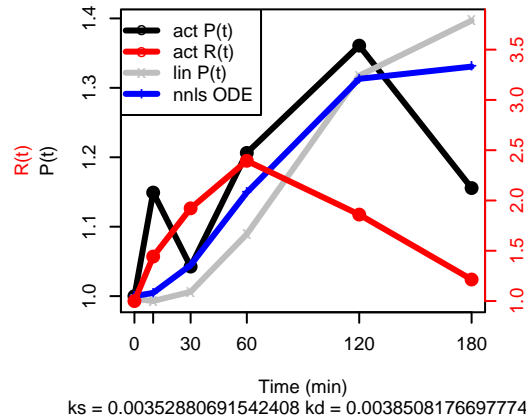

SPAC2F7.05c

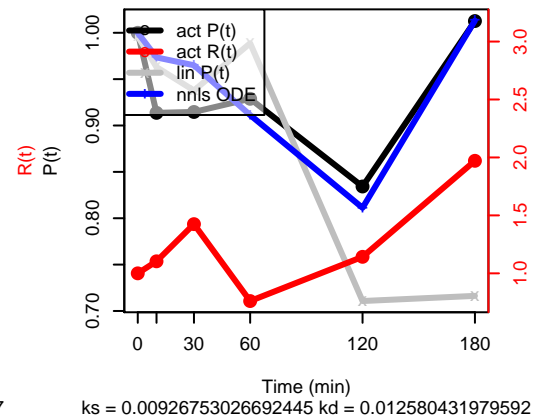

SPAC2G11.11c

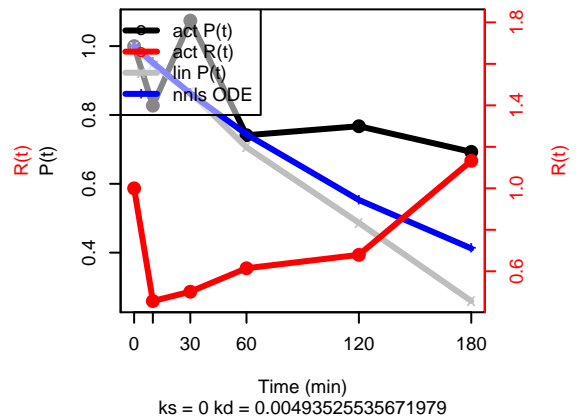

SPAC30D11.11

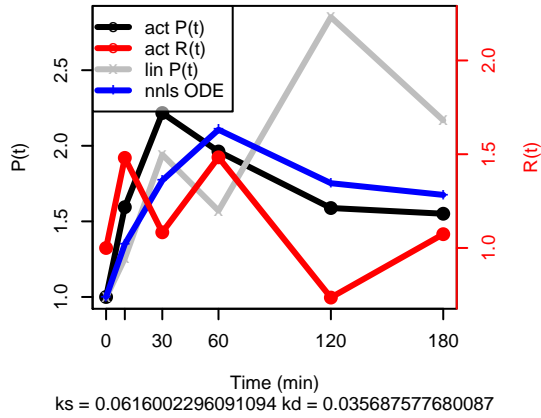

SPAC31A2.04c

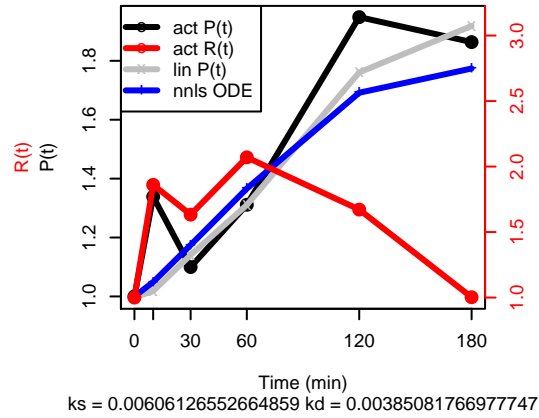

SPAC328.09

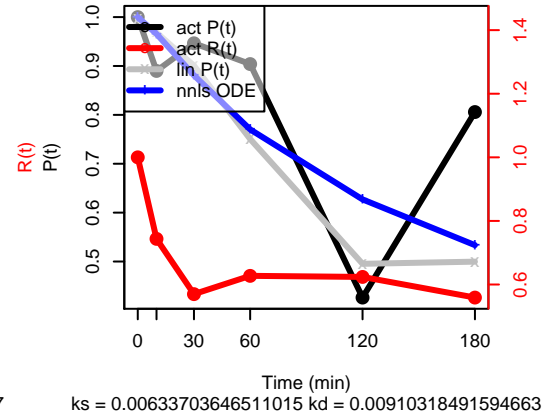

SPAC3A11.10c

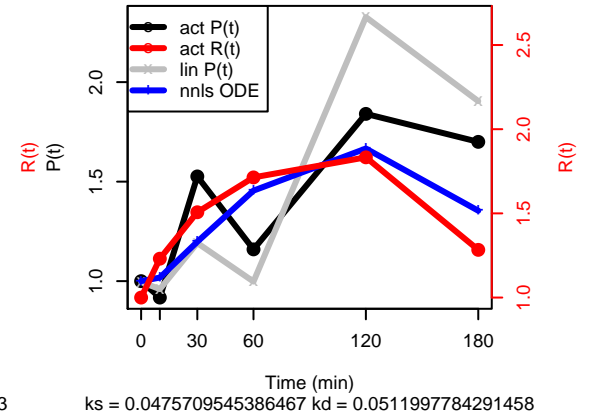

SPAC3H5.07

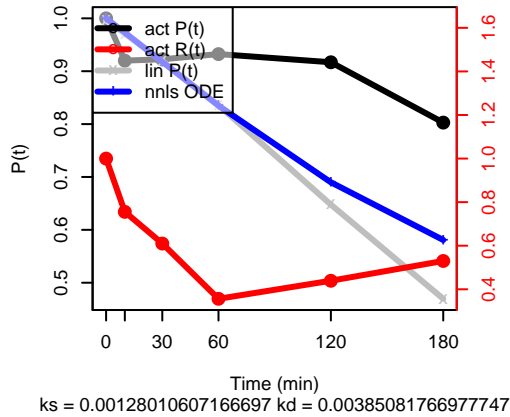

SPAC458.03

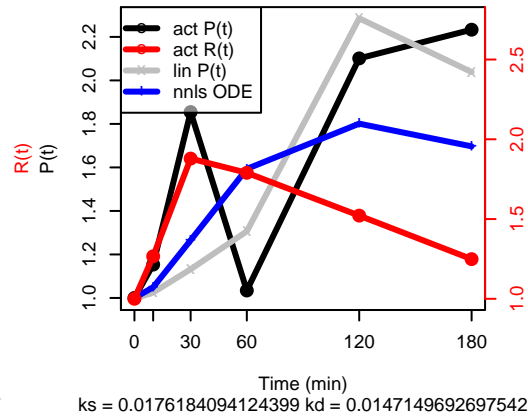

SPAC4F10.09c

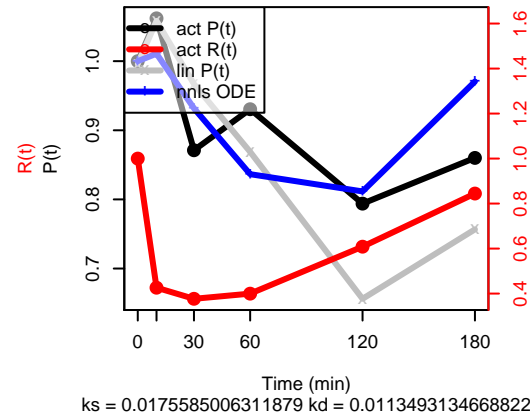

SPAC4G9.10

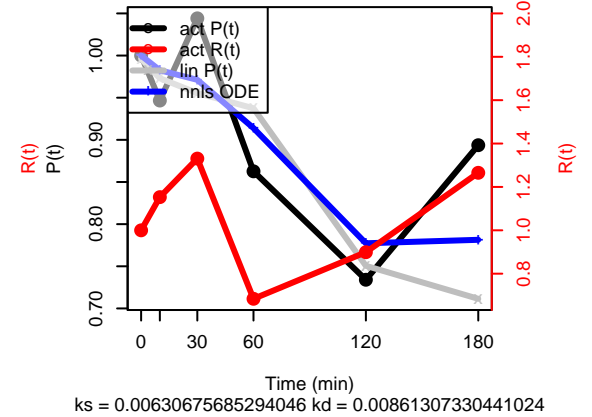

SPAC57A7.12

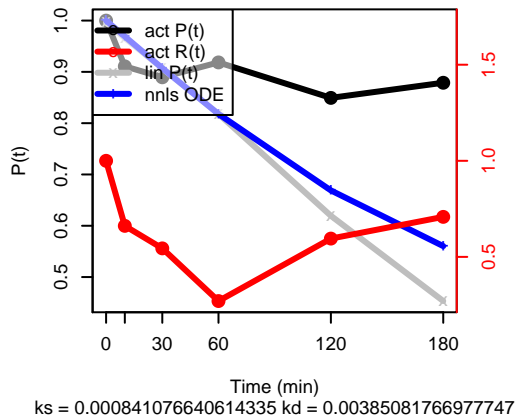

SPAC637.10c

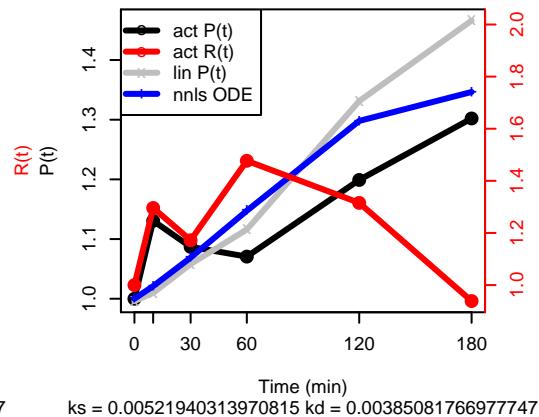

SPAC664.10

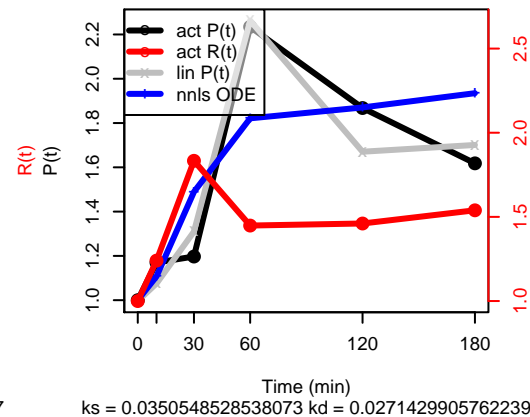

SPAC694.04c

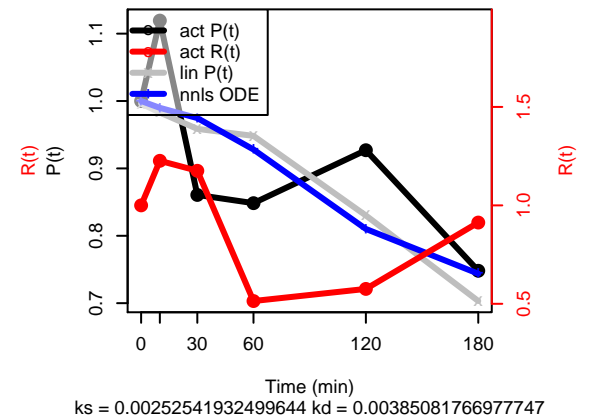

SPAC6F6.03c

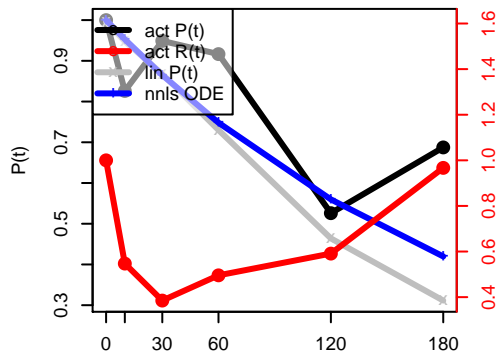

Time (min)  
ks = 0 kd = 0.00483820028410248

SPAC7D4.07c

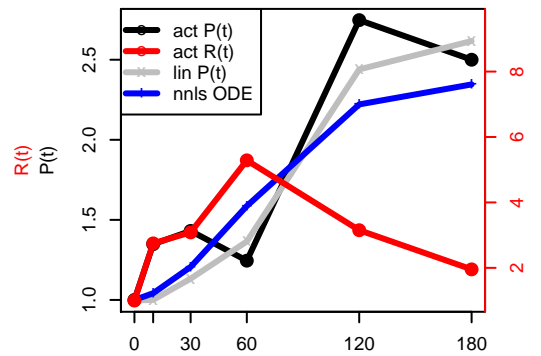

Time (min)  
ks = 0.00429532796814848 kd = 0.00385081766977747

SPAC8C9.03

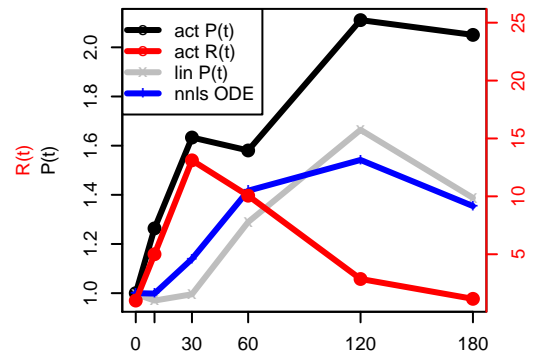

Time (min)  
ks = 0.00122673128691728 kd = 0.00385081766977747

SPAPB17E12.11

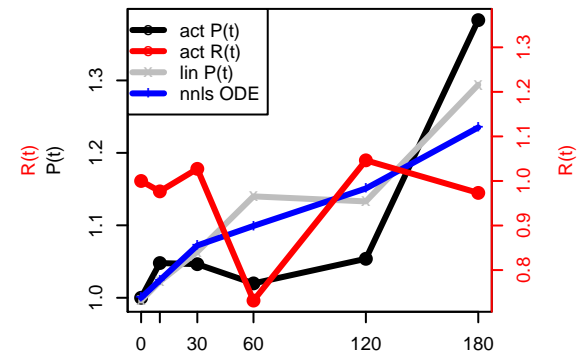

Time (min)  
ks = 0.00965791712889695 kd = 0.00704198512758954

SPBC119.02

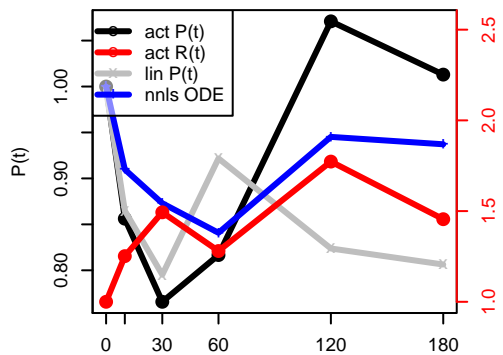

Time (min)  
ks = 0.0196128702139051 kd = 0.0327414481089778

SPBC119.03

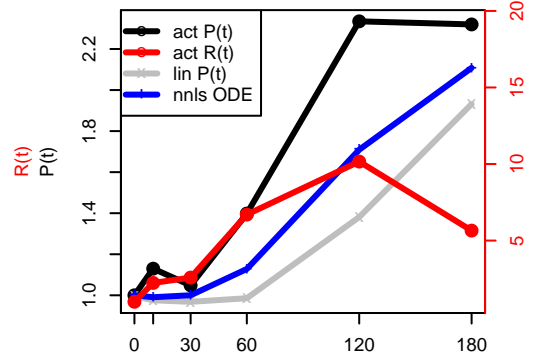

Time (min)  
ks = 0.00178812972601605 kd = 0.00385081766977747

SPBC119.05c

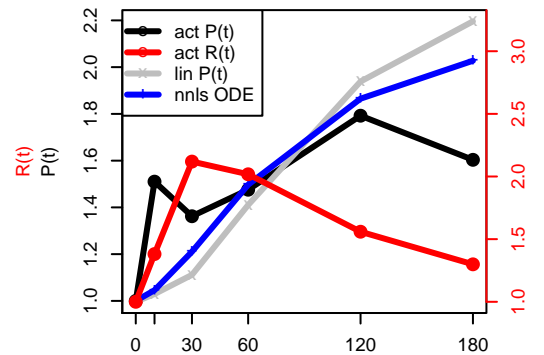

Time (min)  
ks = 0.0071781849409588 kd = 0.00385081766977747

SPBC119.12

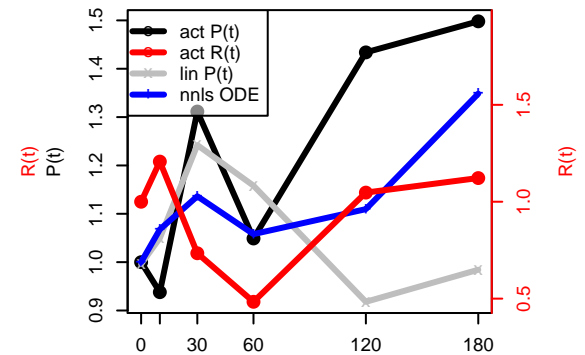

Time (min)  
ks = 0.0170334387403979 kd = 0.0116695327543056

SPBC13G1.02

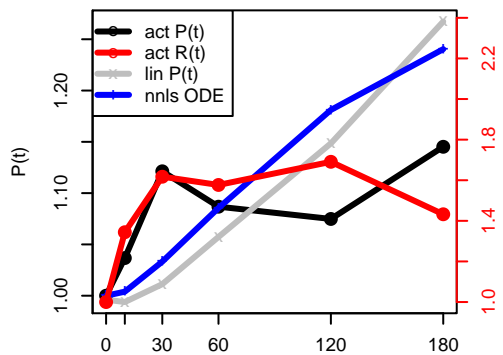

Time (min)  
ks = 0.00361827248450006 kd = 0.00385081766977747

SPBC14F5.05c

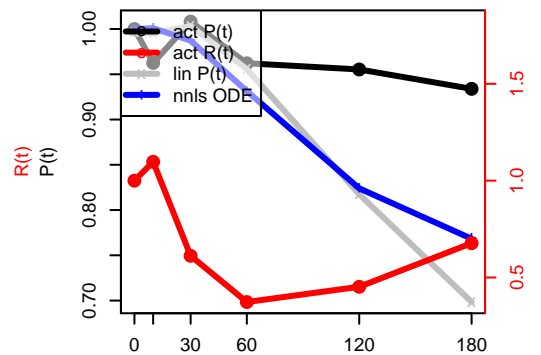

Time (min)  
ks = 0.00375001165667461 kd = 0.00385081766977747

SPBC1539.07c

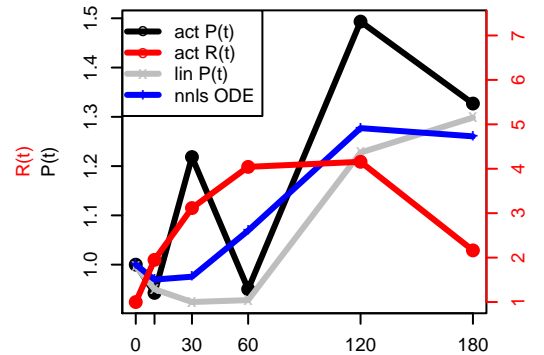

Time (min)  
ks = 0.00303157680500159 kd = 0.00764526840000487

SPBC1683.01

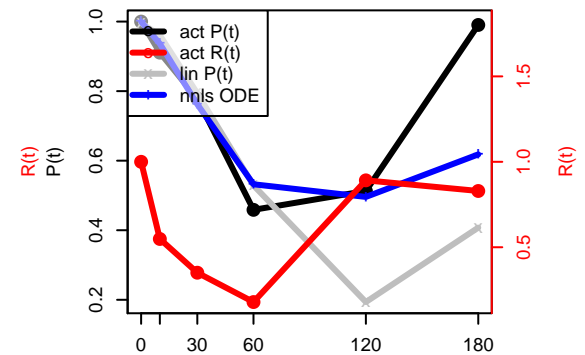

Time (min)  
ks = 0.0142028470301918 kd = 0.0177365594713494

SPBC1685.10

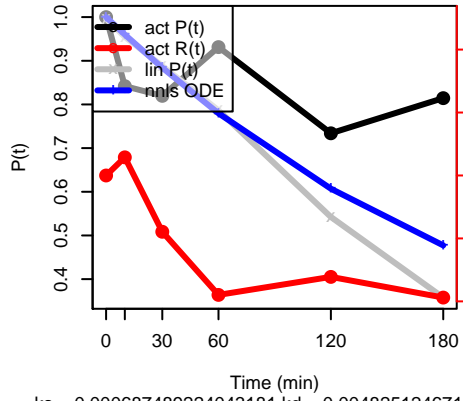

SPBC1685.14c

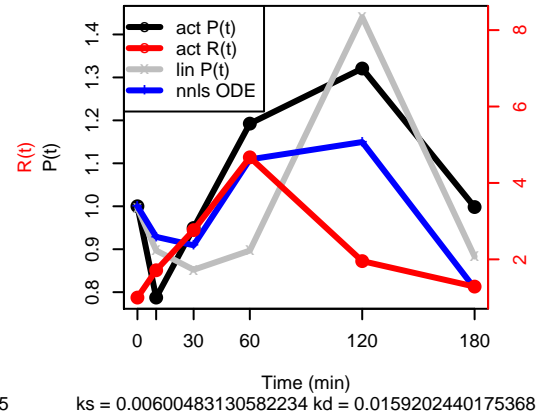

SPBC16G5.09

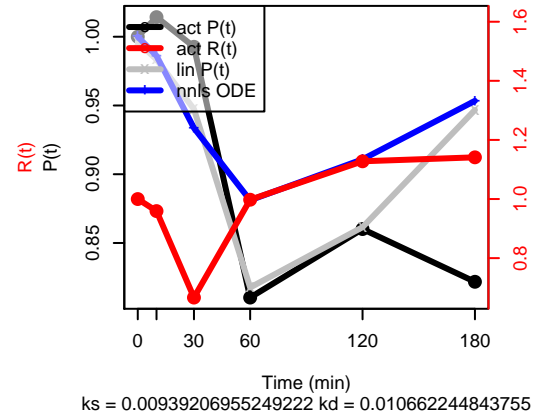

SPBC16H5.03c

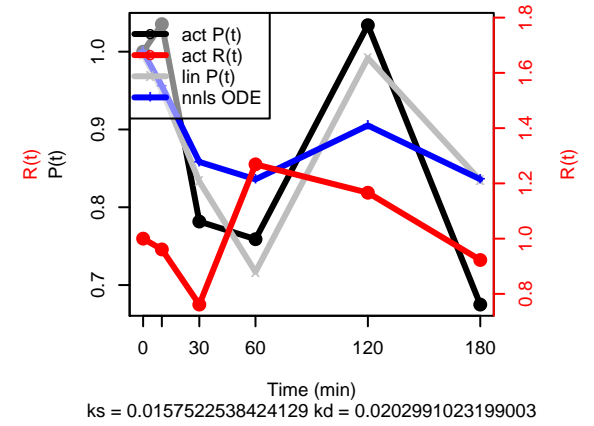

SPBC16H5.12c

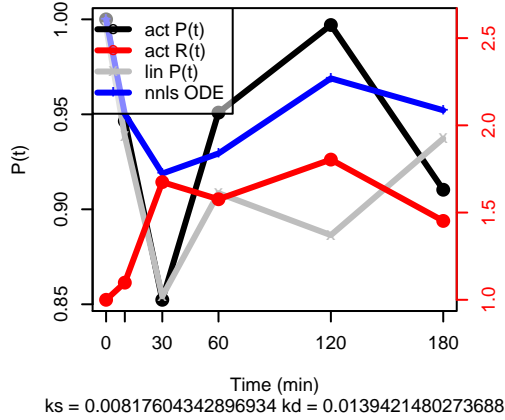

SPBC1703.07

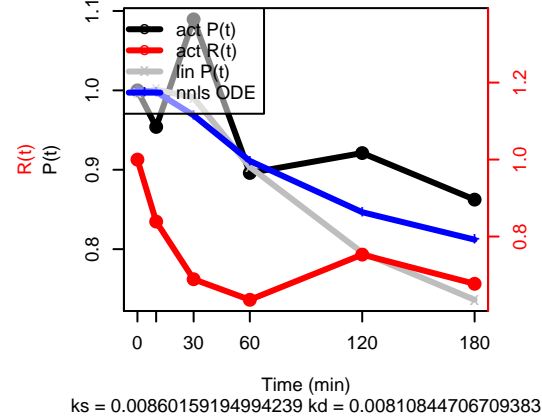

SPBC1709.18

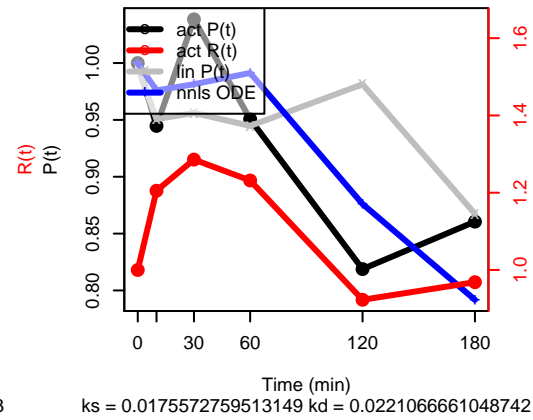

SPBC17A3.04c

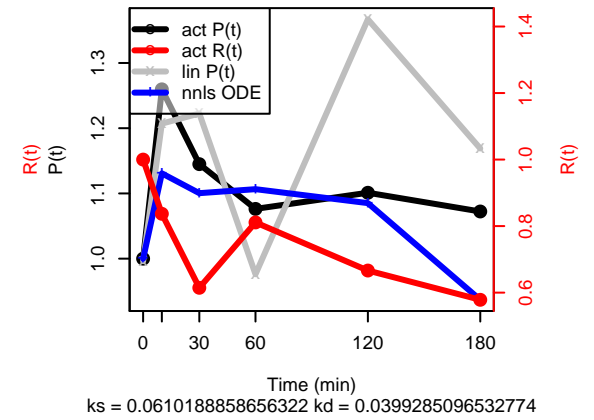

SPBC17G9.04c

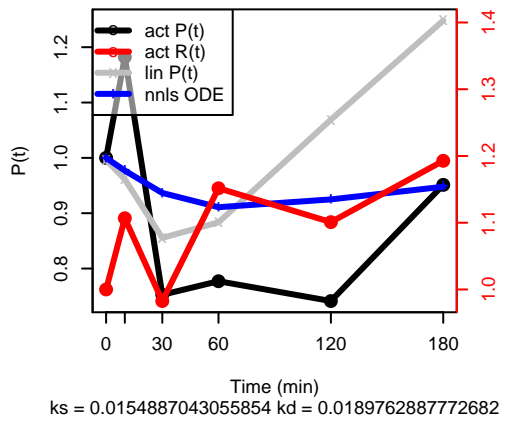

SPBC18E5.11c

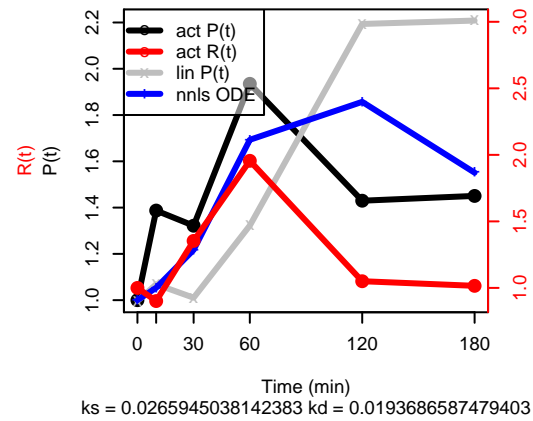

SPBC18H10.04c

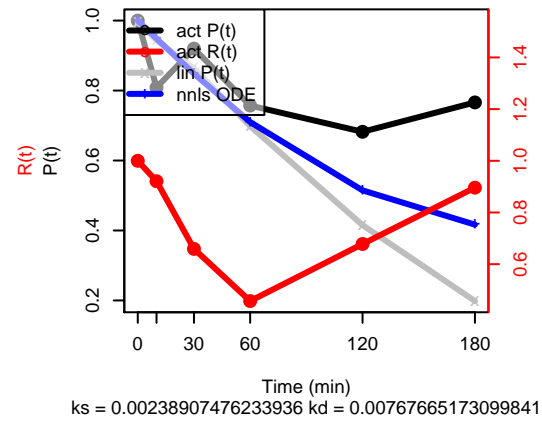

SPBC1921.05

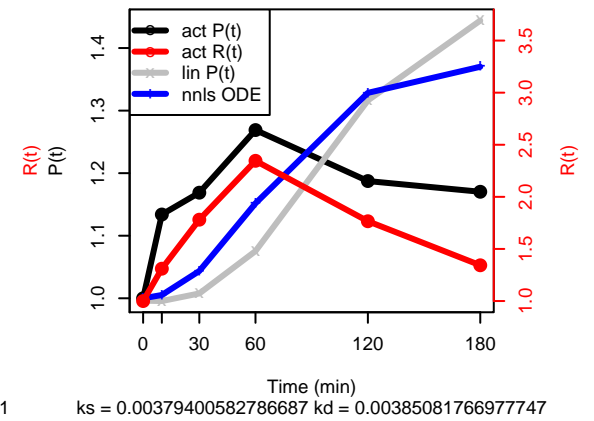

SPBC215.02

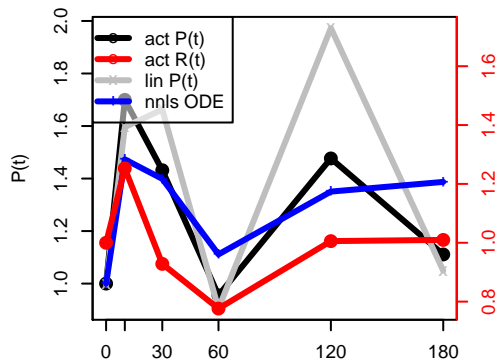

Time (min)  
ks = 0.220811343450635 kd = 0.160813101119566

SPBC215.06c

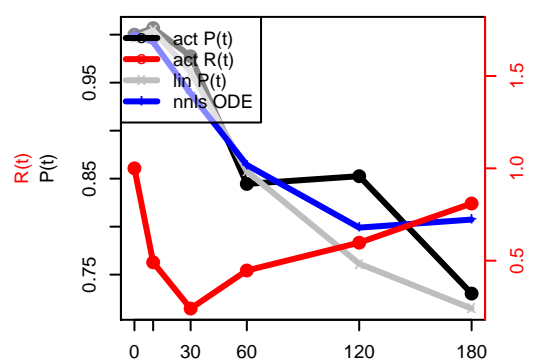

Time (min)  
ks = 0.00575284494013427 kd = 0.00494469468089191

SPBC215.07c

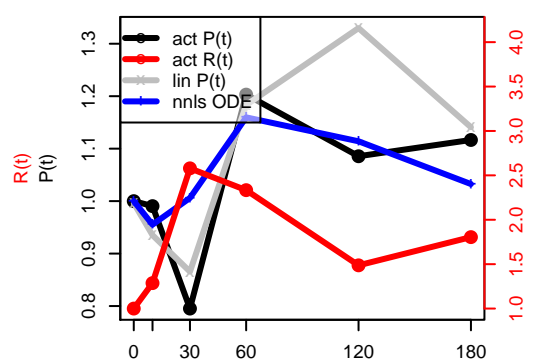

Time (min)  
ks = 0.00865395361727413 kd = 0.0147545503357891

SPBC21C3.08c

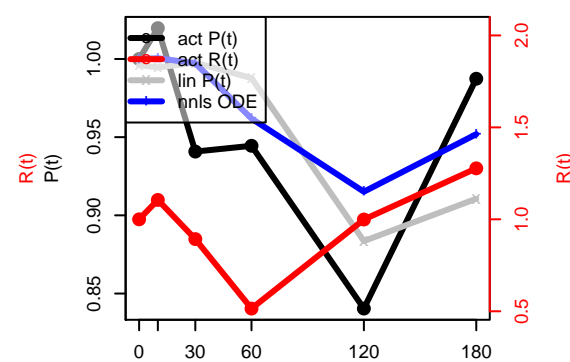

Time (min)  
ks = 0.00369123960315261 kd = 0.00385081766977747

SPBC21D10.11c

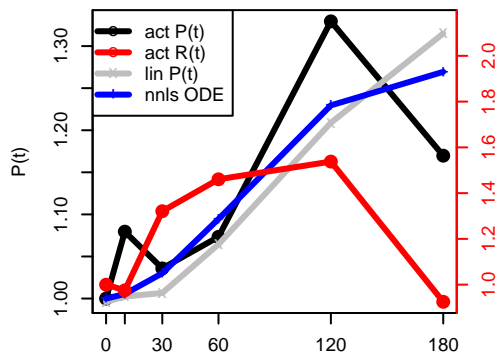

Time (min)  
ks = 0.00447847196731099 kd = 0.00385081766977747

SPBC21H7.05

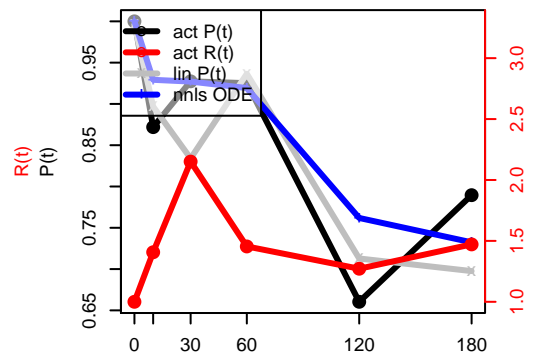

Time (min)  
ks = 0.0103180463287028 kd = 0.0202513306795929

SPBC25H2.02

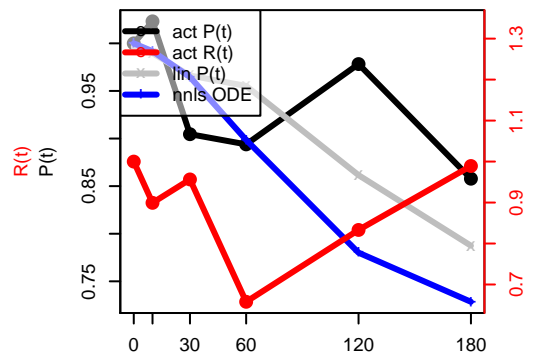

Time (min)  
ks = 0.0041769378718978 kd = 0.00482045876718544

SPBC26H8.10

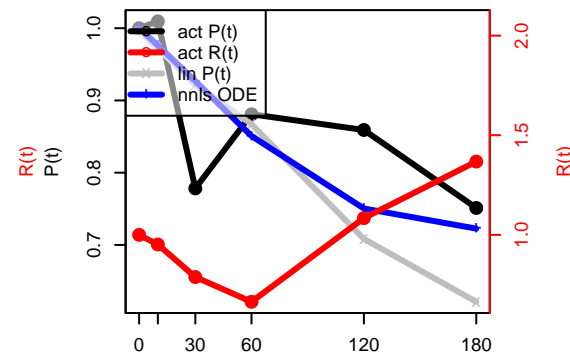

Time (min)  
ks = 0.00258925565933419 kd = 0.00495680314000389

SPBC27B12.03c

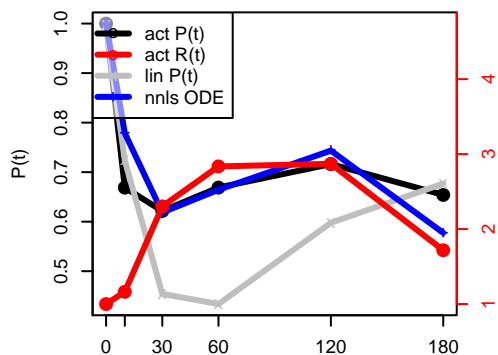

Time (min)  
ks = 0.00968450584076504 kd = 0.0369705278832025

SPBC28E12.06c

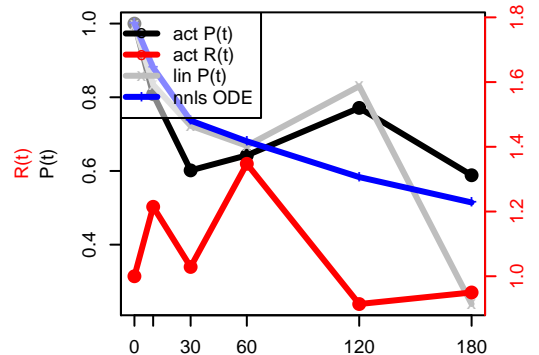

Time (min)  
ks = 0.018599309712436 kd = 0.0348223328609154

SPBC28F2.09

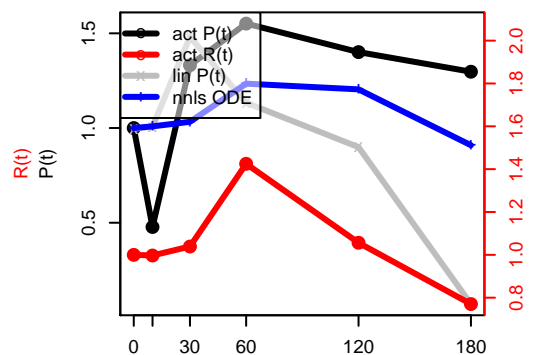

Time (min)  
ks = 0.0446065898140671 kd = 0.0434931555152711

SPBC29A10.08

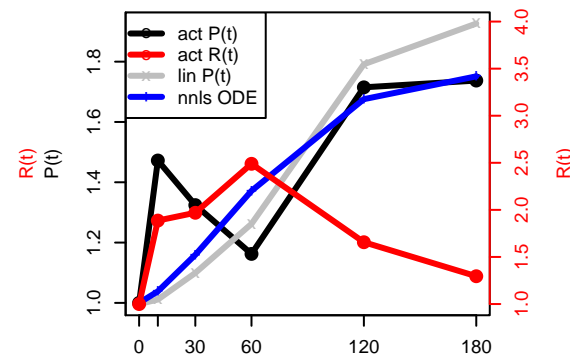

Time (min)  
ks = 0.00534311547185387 kd = 0.00385081766977747



SPBC29B5.01

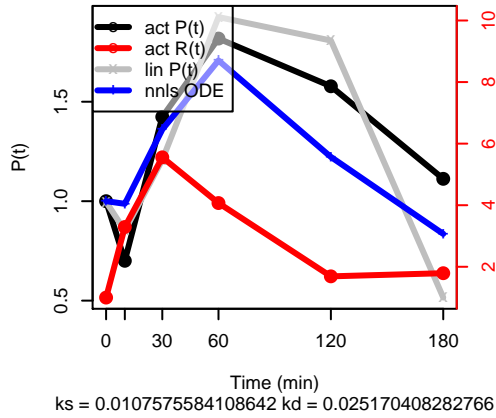

SPBC29B5.03c

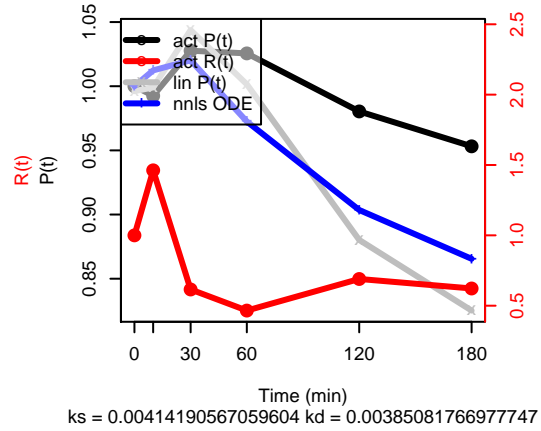

SPBC2D10.09

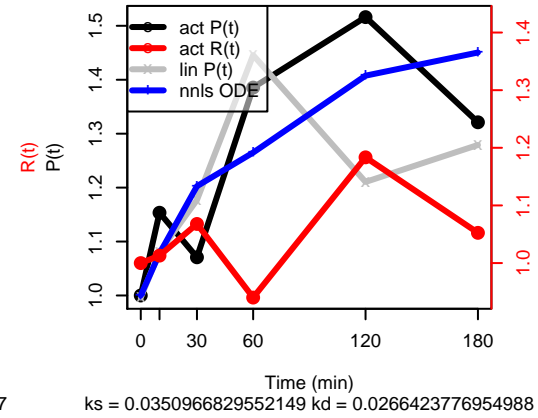

SPBC2F12.04

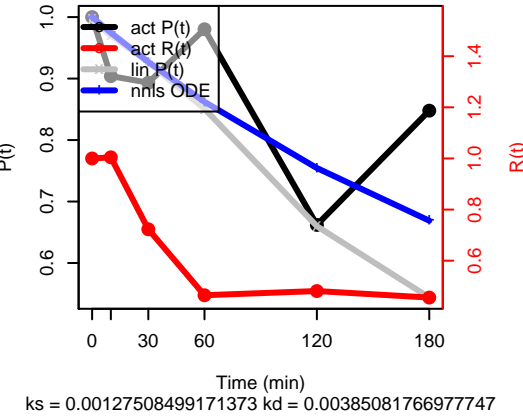

SPBC3B9.10

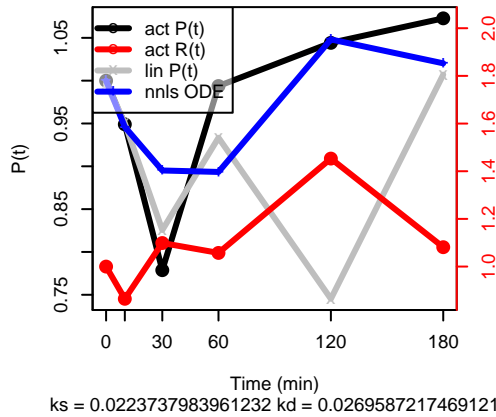

SPBC3E7.05c

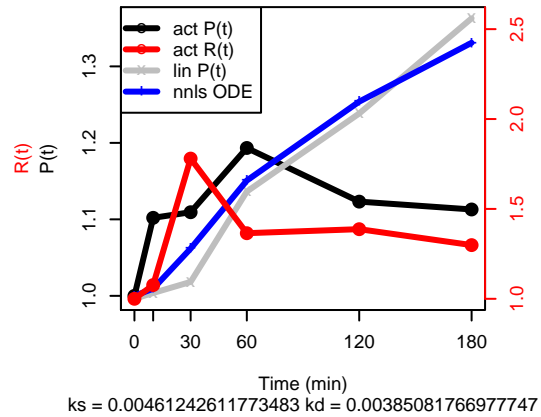

SPBC3F6.01c

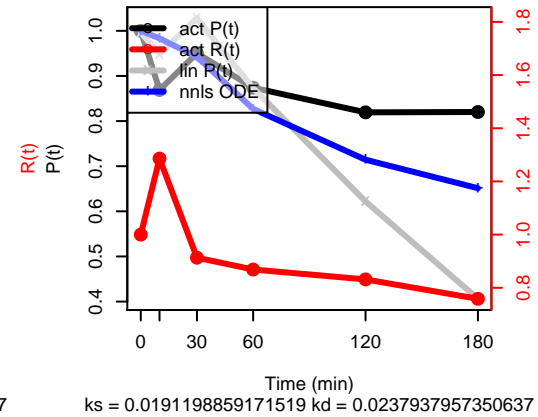

SPBC409.19c

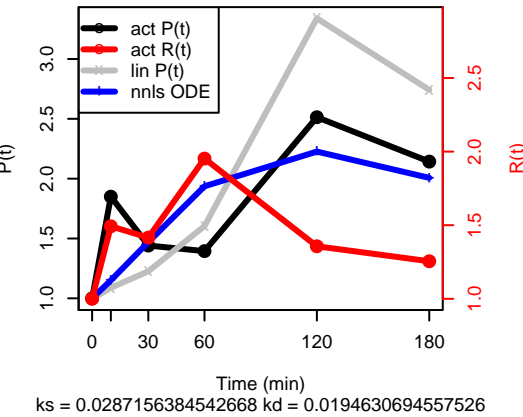

SPBC428.14

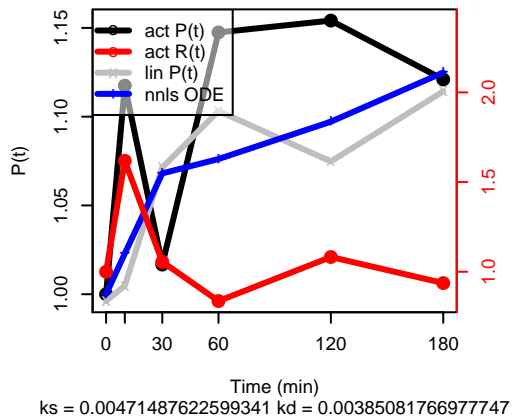

SPBC530.04

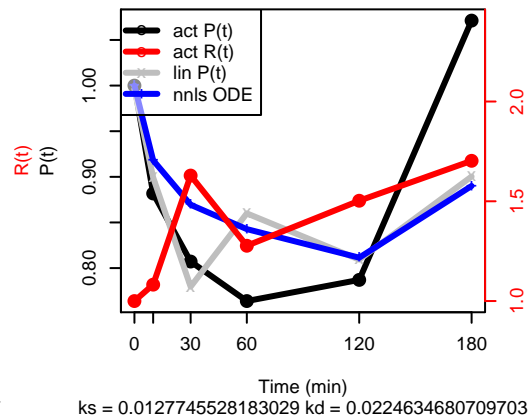

SPBC530.12c

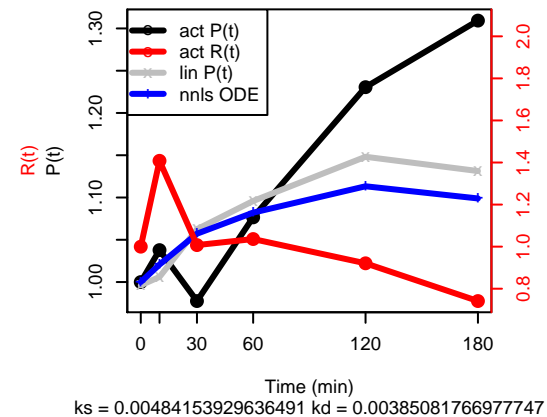

SPBC56F2.02

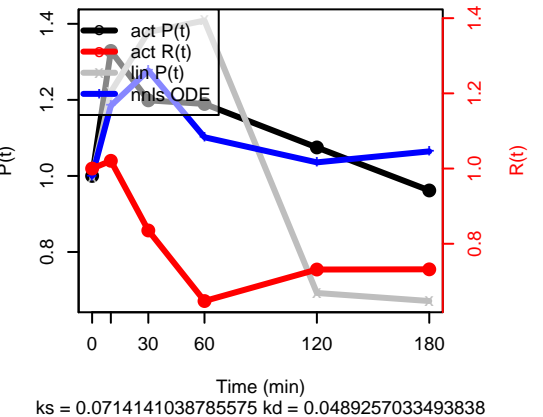

SPBC577.12

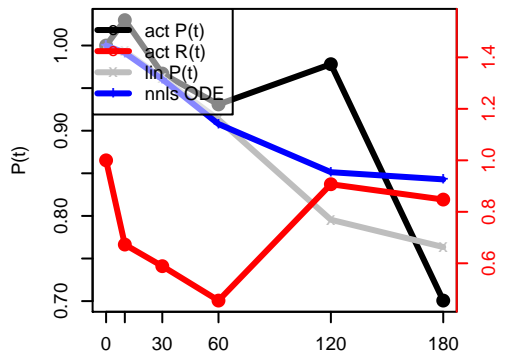

Time (min)  
ks = 0.0035642886131881 kd = 0.00385081766977747

SPBC577.15c

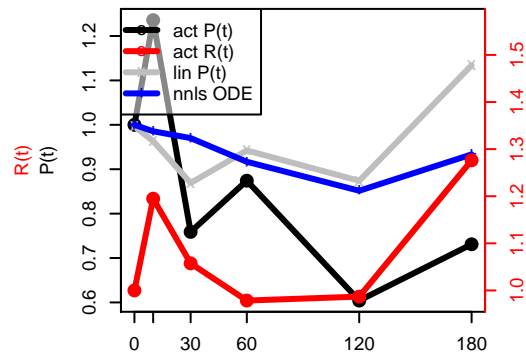

Time (min)  
ks = 0.0164992933113787 kd = 0.0197722691149197

SPBC582.03

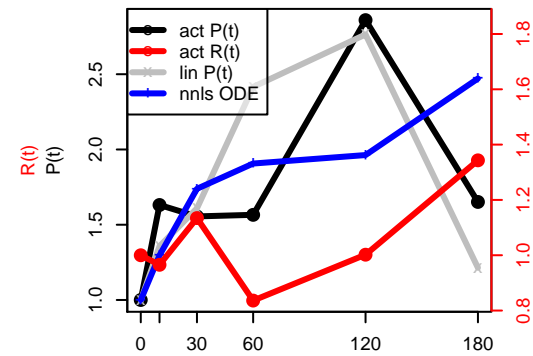

Time (min)  
ks = 0.0694453503403865 kd = 0.0333701745346883

SPBC713.03

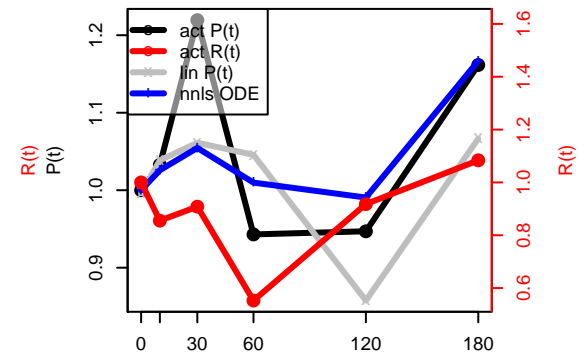

Time (min)  
ks = 0.018276921487048 kd = 0.0140378764437712

SPBC713.09

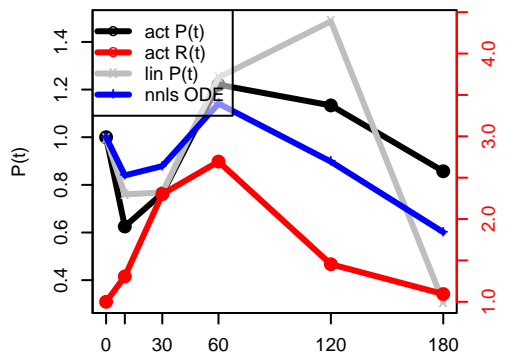

Time (min)  
ks = 0.0221959832365782 kd = 0.0457811328999884

SPBC776.08c

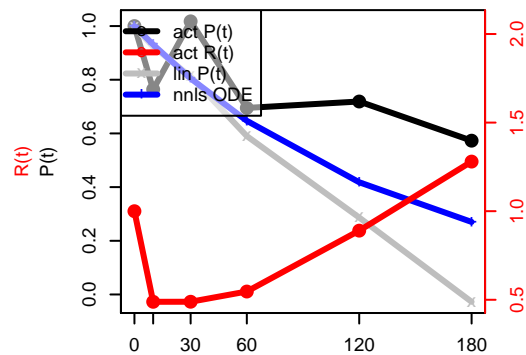

Time (min)  
ks = 0 kd = 0.00727673266391658

SPBC800.04c

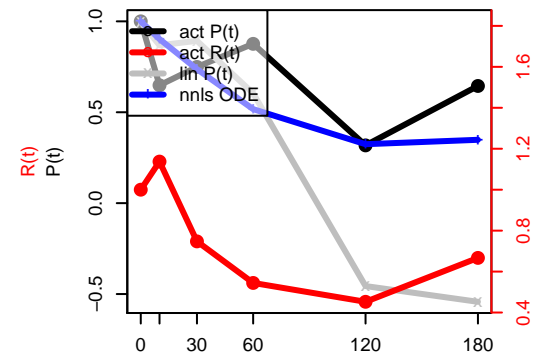

Time (min)  
ks = 0.0194680241830519 kd = 0.0322640816522726

SPBC8D2.06

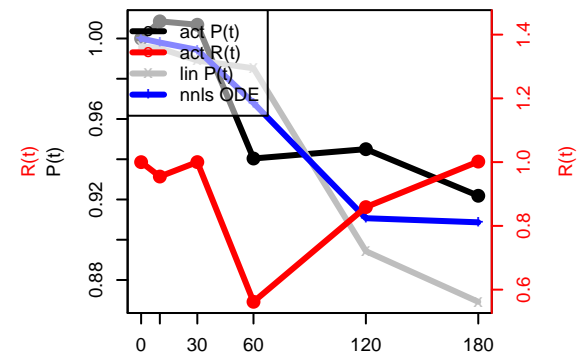

Time (min)  
ks = 0.00374869453893979 kd = 0.00385081766977747

SPBC9B6.08

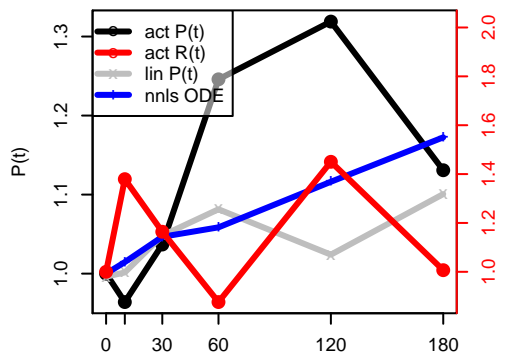

Time (min)  
ks = 0.00438304602999479 kd = 0.00385081766977747

SPBC9B6.10

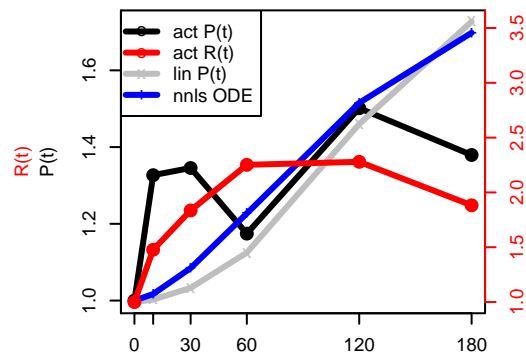

Time (min)  
ks = 0.00448982109116148 kd = 0.00385081766977747

SPBP19A11.06

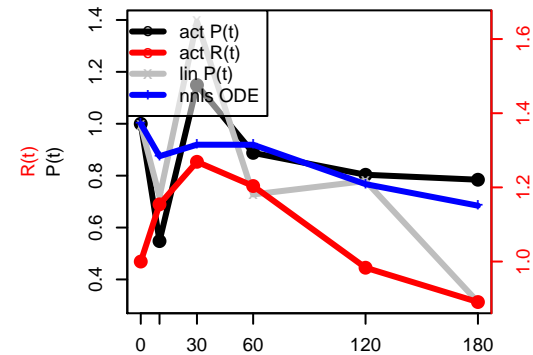

Time (min)  
ks = 0.0807448123348749 kd = 0.108503516983358

SPBP23A10.11c

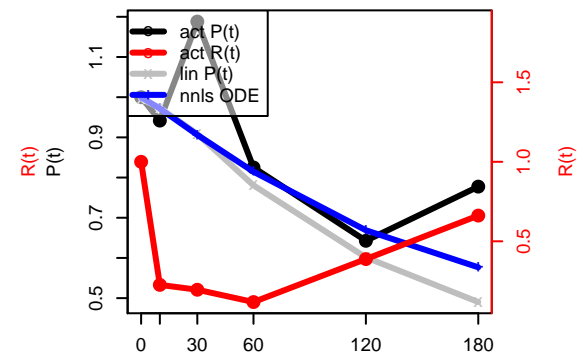

Time (min)  
ks = 0.0016060057151755 kd = 0.00385081766977747

SPBP8B7.05c

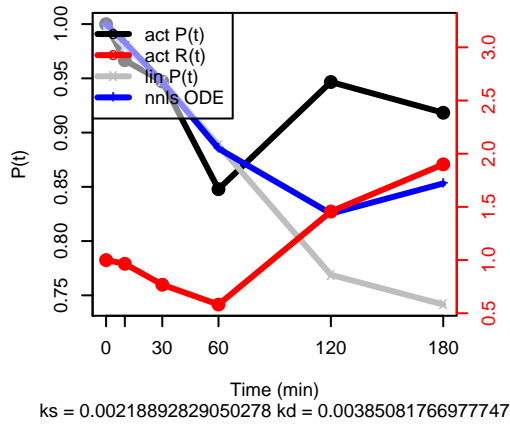

SPCC1020.08

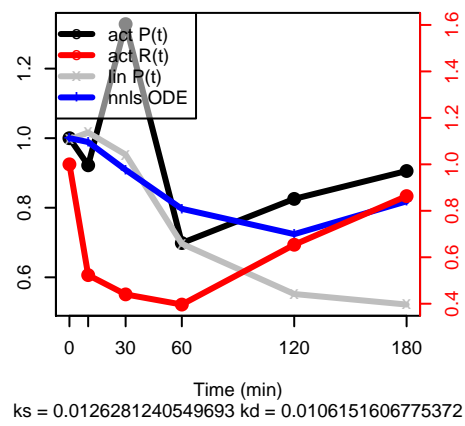

SPCC1183.08c

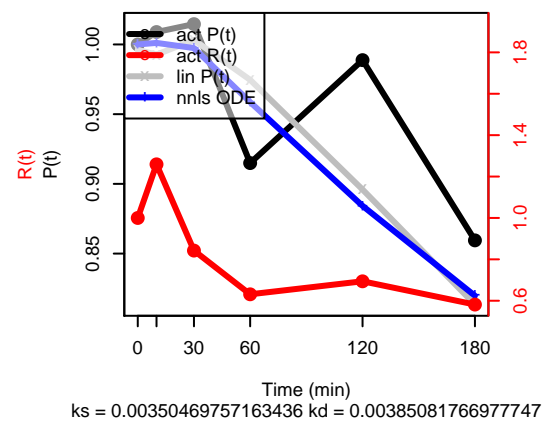

SPCC1183.11

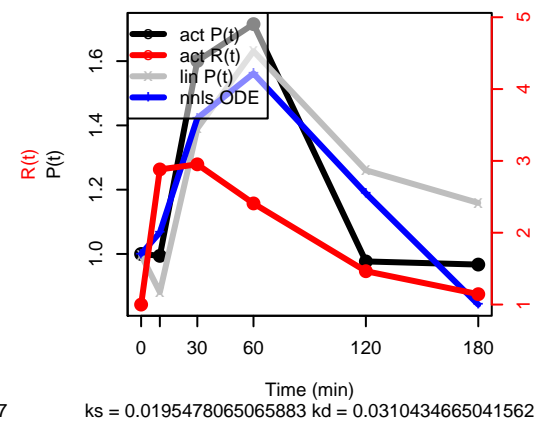

SPCC1450.13c

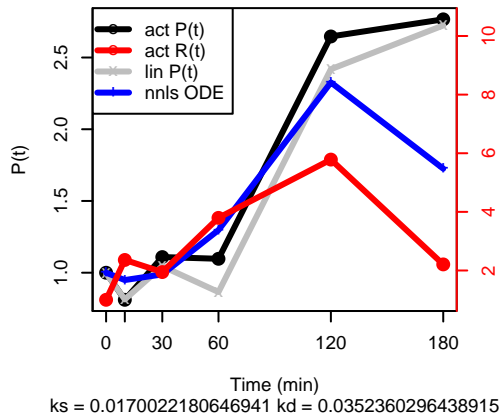

SPCC1753.04

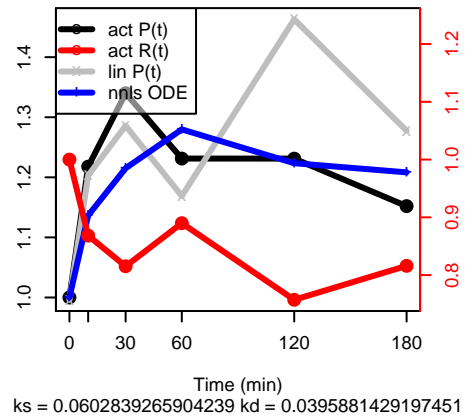

SPCC18.04

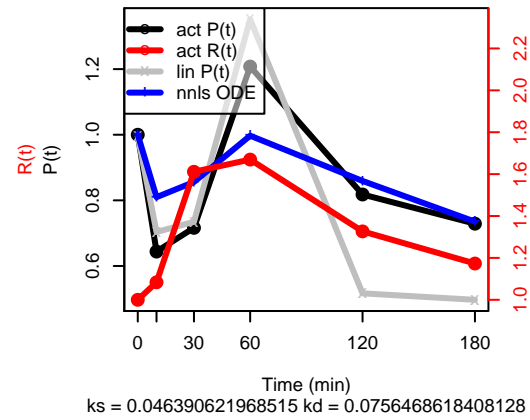

SPCC1840.03

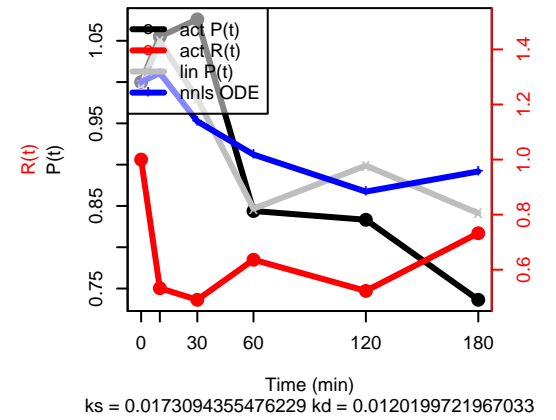

SPCC23B6.01c

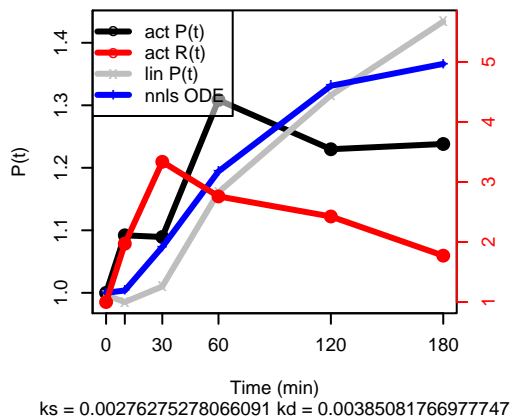

SPCC338.14

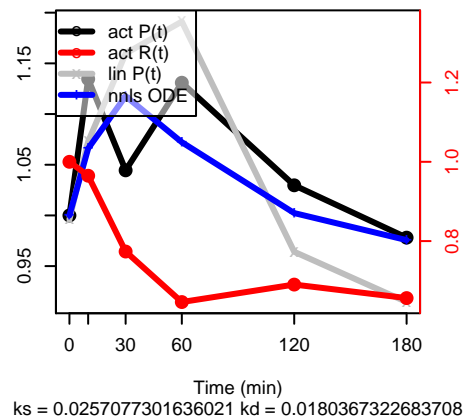

SPCC364.03

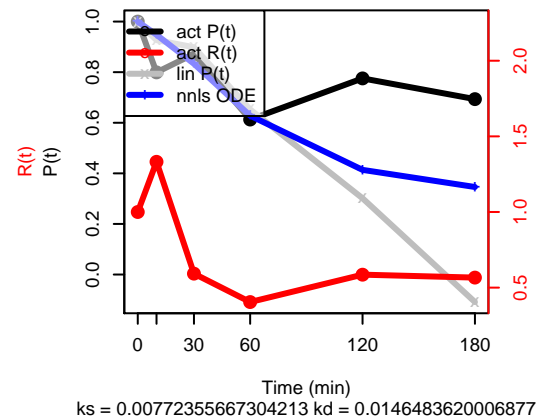

SPCC584.04

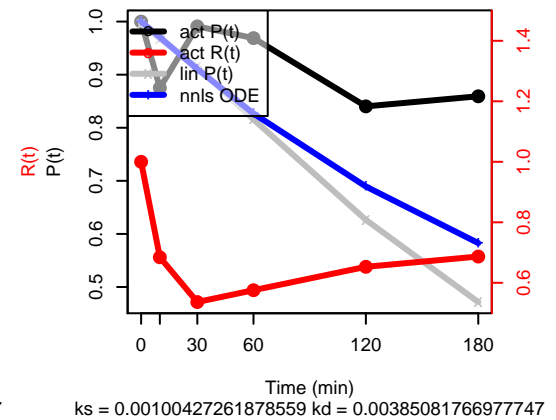

SPCC622.14

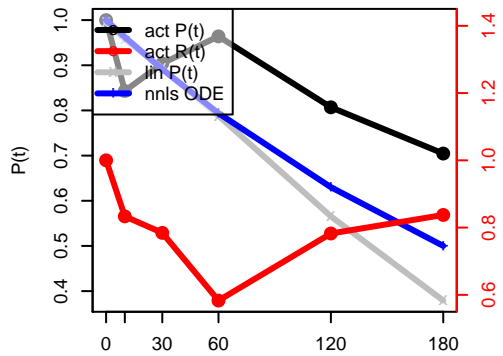

Time (min)  
ks = 0 kd = 0.00385081766977747

SPCC663.09c

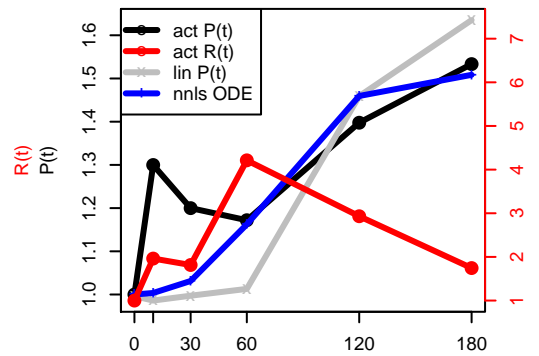

Time (min)  
ks = 0.00283620224891037 kd = 0.00385081766977747

SPCC736.10c

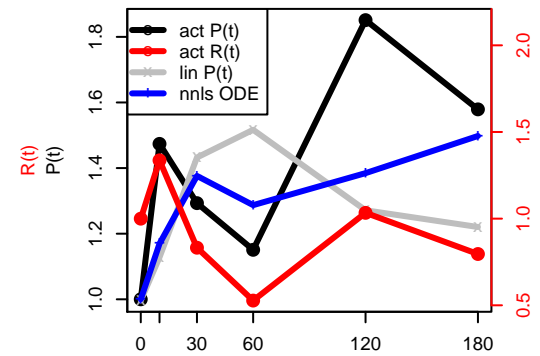

Time (min)  
ks = 0.0309223879266181 kd = 0.0177228621570369

SPCPB16A4.03c

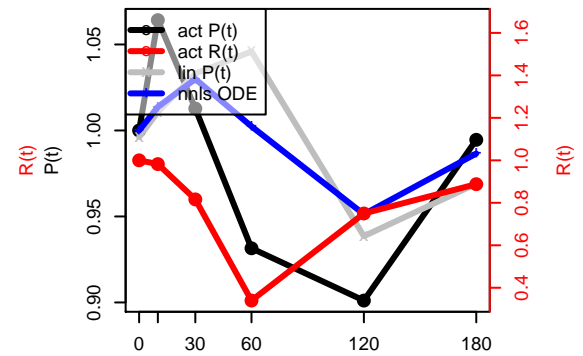

Time (min)  
ks = 0.00531803619808684 kd = 0.00386116657440734

SPAC1002.12c

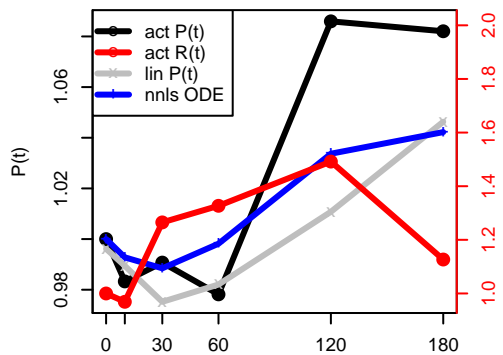

Time (min)  
ks = 0.00326118774402996 kd = 0.00393459518586389

SPAC1071.02

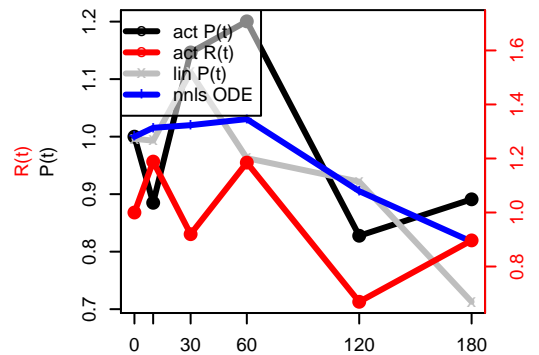

Time (min)  
ks = 0.0204269706460909 kd = 0.0207283933250337

SPAC10F6.06

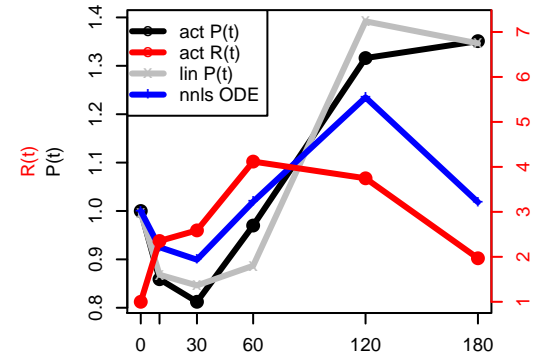

Time (min)  
ks = 0.00661429477975266 kd = 0.0194052803057034

SPAC144.16

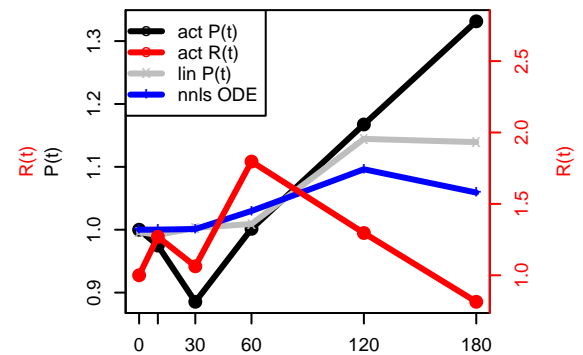

Time (min)  
ks = 0.00340222341283074 kd = 0.00385081766977747

SPAC1556.07

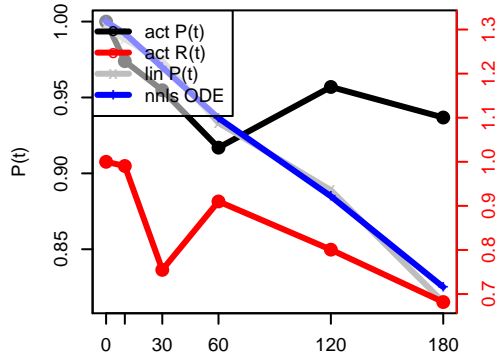

Time (min)  
ks = 0.00306789983911085 kd = 0.00385081766977747

SPAC1751.03

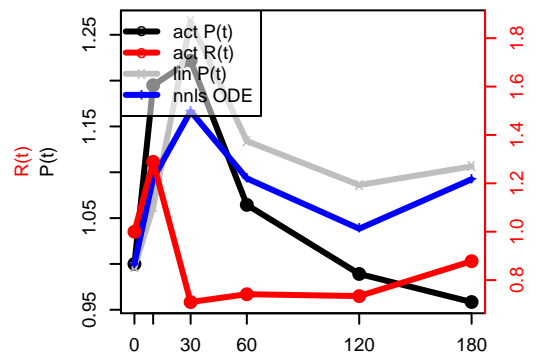

Time (min)  
ks = 0.0241481580153057 kd = 0.01757396106578

SPAC1786.03

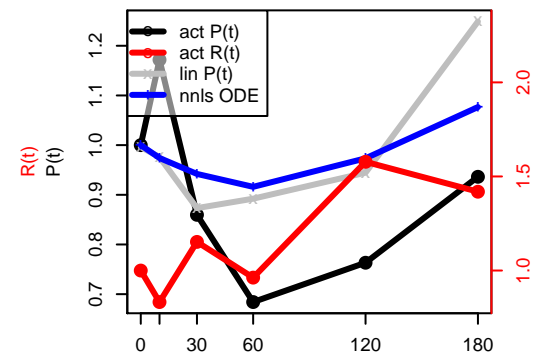

Time (min)  
ks = 0.00812354698569455 kd = 0.0101519043515877

SPAC17A5.15c

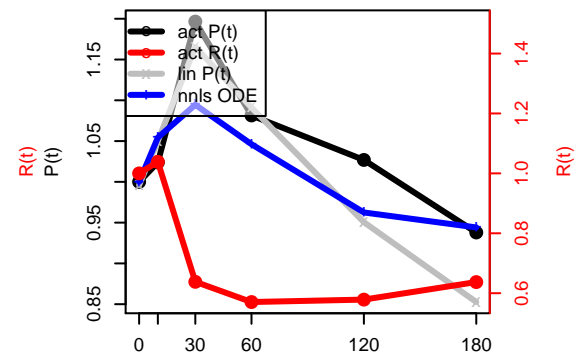

Time (min)  
ks = 0.0160147400465129 kd = 0.0106131432688094

SPAC17G6.09

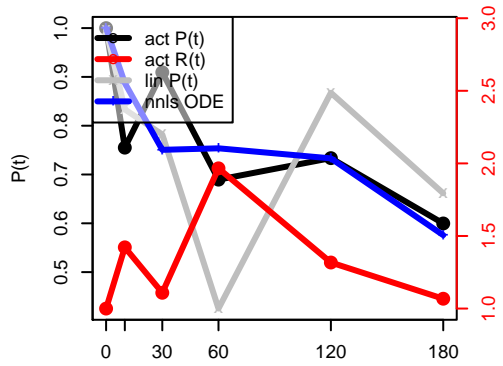

Time (min)  
ks = 0.0145599695905477 kd = 0.0308260276085156

SPAC17H9.13c

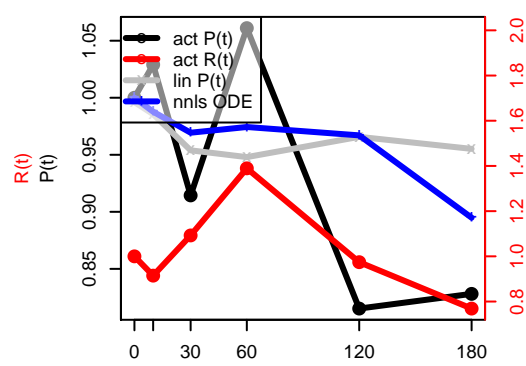

Time (min)  
ks = 0.00432060814703059 kd = 0.00537883384088141

SPAC1805.11c

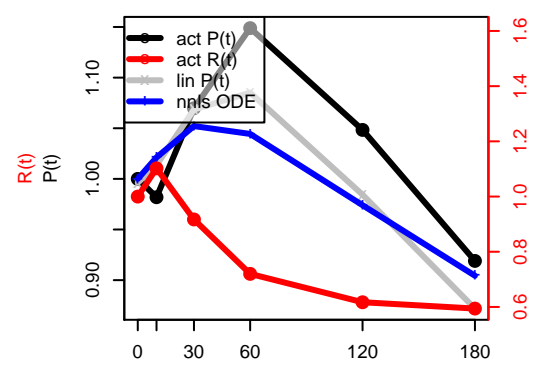

Time (min)  
ks = 0.00858532533874601 kd = 0.00684120976993991

SPAC19G12.08

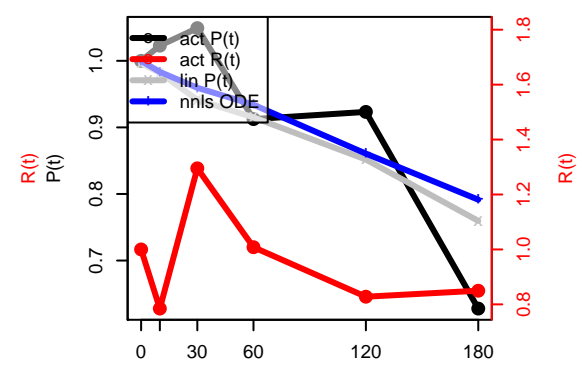

Time (min)  
ks = 0.0024385485802533 kd = 0.00385081766977747

SPAC1A6.07

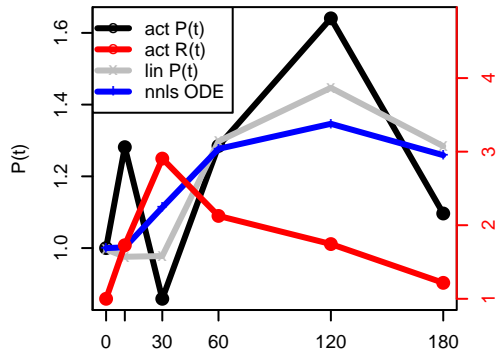

Time (min)  
ks = 0.00606260315546833 kd = 0.00809947537527265

SPAC1F12.02c

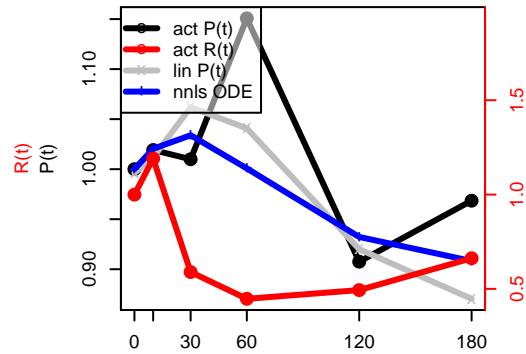

Time (min)  
ks = 0.00540428476694682 kd = 0.00385081766977747

SPAC22A12.08c

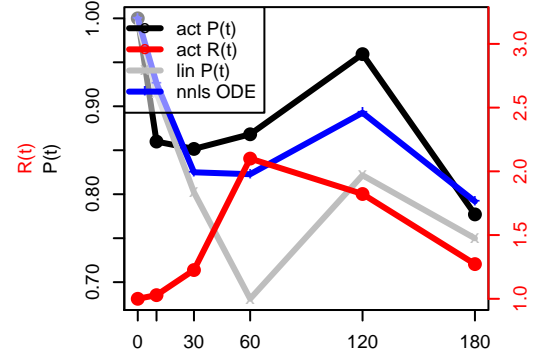

Time (min)  
ks = 0.0075906832500401 kd = 0.0156656335534836

SPAC22A12.10

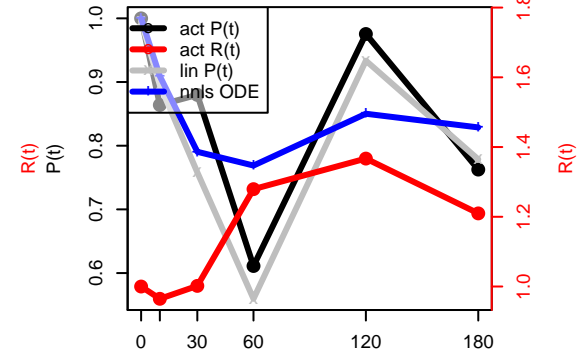

Time (min)  
ks = 0.0185624103121017 kd = 0.0286596242554272

SPAC23C4.08

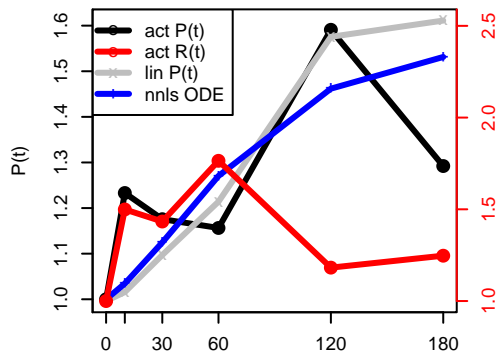

Time (min)  
ks = 0.00618063045020558 kd = 0.00421973168764062

SPAC23C4.11

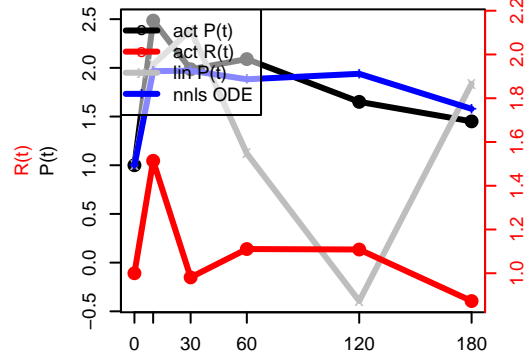

Time (min)  
ks = 0.247122208020851 kd = 0.143406361492411

SPAC24B11.05

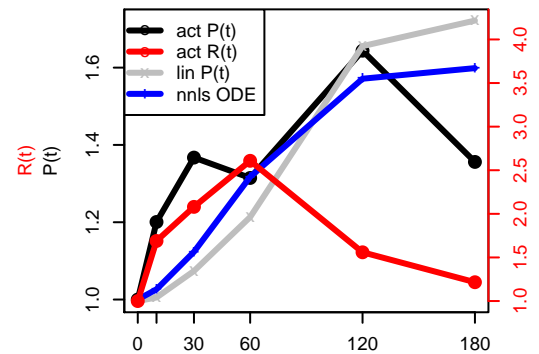

Time (min)  
ks = 0.00476661726778063 kd = 0.00385081766977747

SPAC26F1.09

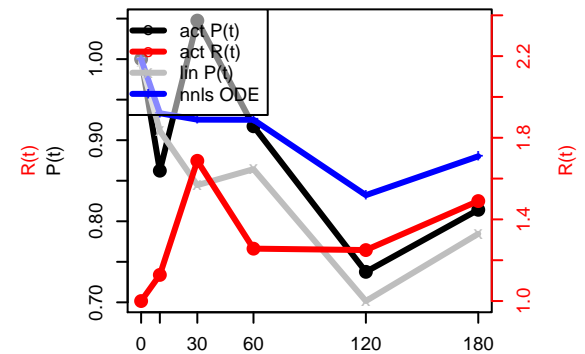

Time (min)  
ks = 0.014894016754749 kd = 0.0233614583524929

SPAC26F1.12c

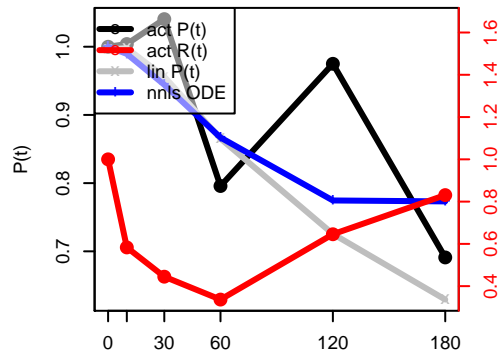

Time (min)  
ks = 0.00537166970569746 kd = 0.00520168813012661

SPAC27D7.06

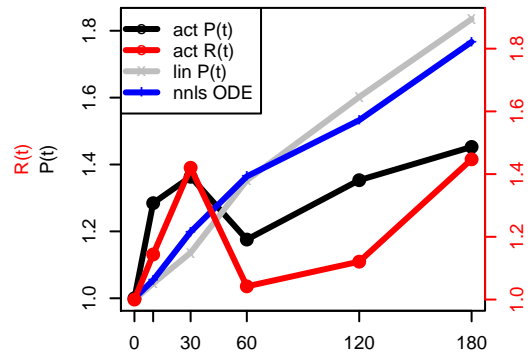

Time (min)  
ks = 0.0113841583819004 kd = 0.00656138281046647

SPAC3F10.13

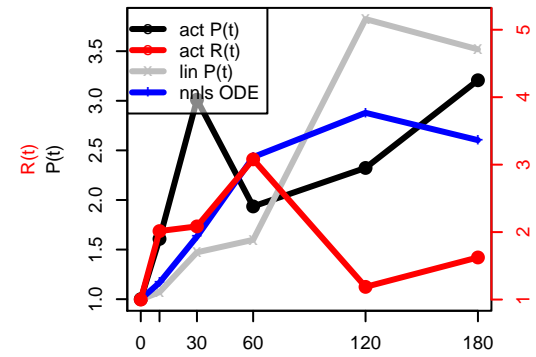

Time (min)  
ks = 0.0197784543434229 kd = 0.0123026408687134

SPAC4A8.05c

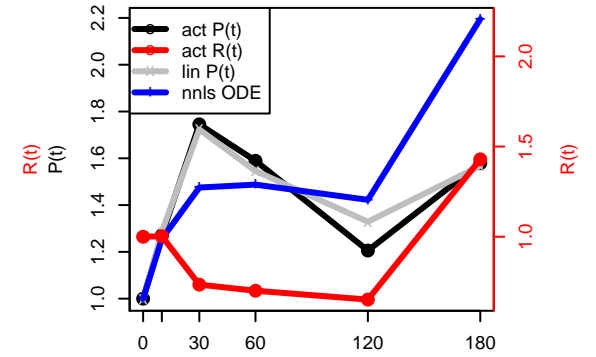

Time (min)  
ks = 0.0559489457404412 kd = 0.0269424140545616

SPAC4A8.13c

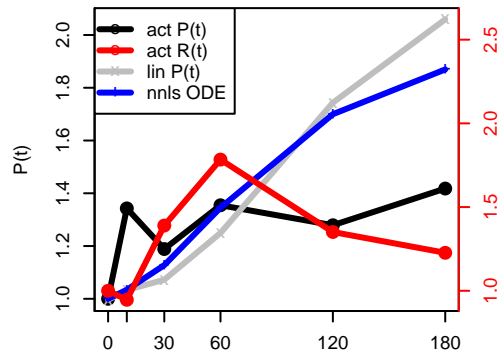

Time (min)  
ks = 0.00754103297593249 kd = 0.00385081766977747

SPAC4F10.14c

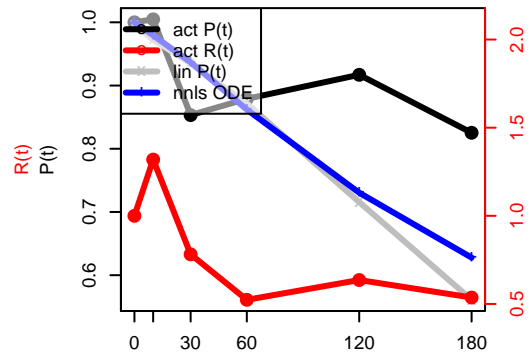

Time (min)  
ks = 0.00150193110864683 kd = 0.00385081766977747

SPAC4F8.07c

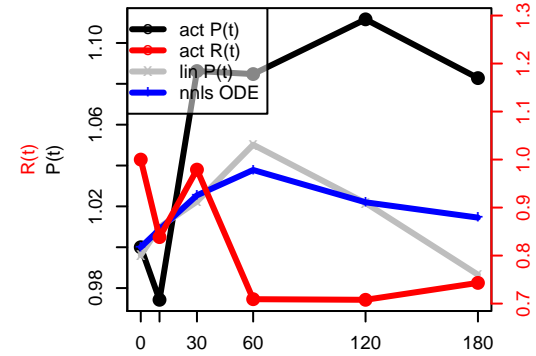

Time (min)  
ks = 0.00522001661039545 kd = 0.00385081766977747

SPAC4G9.11c

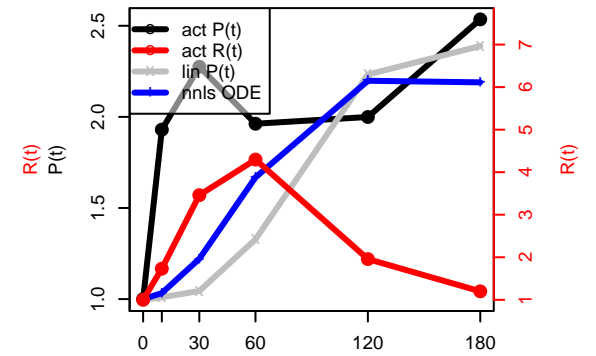

Time (min)  
ks = 0.00526683083634393 kd = 0.00385081766977747

SPAC644.17c

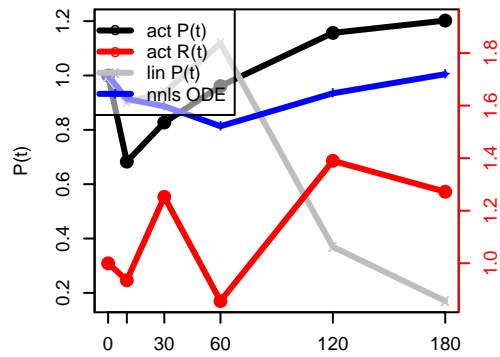

Time (min)  
ks = 0.0325479365895357 kd = 0.0419841157250751

SPAC6F12.10c

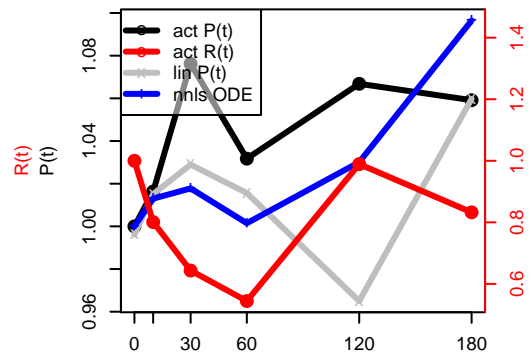

Time (min)  
ks = 0.00574906740010995 kd = 0.00385081766977747

SPAC6F6.07c

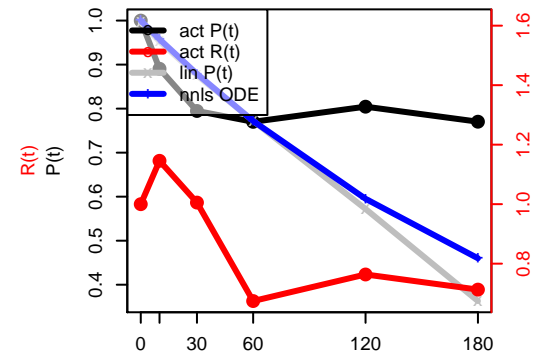

Time (min)  
ks = 0 kd = 0.00433360209688876

SPAC6G9.07c

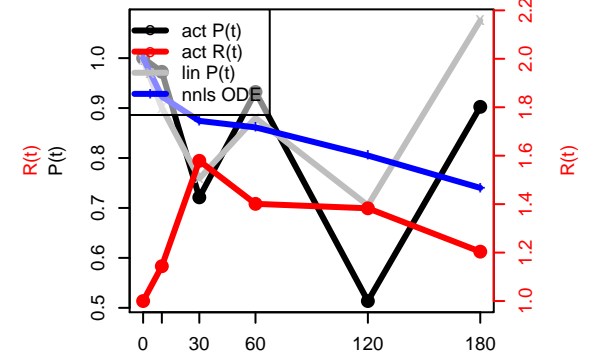

Time (min)  
ks = 0.0127278043432828 kd = 0.0222595723168642

SPAC7D4.11c

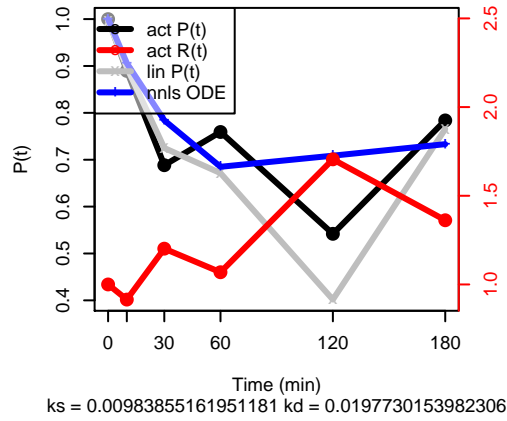

SPAC806.07

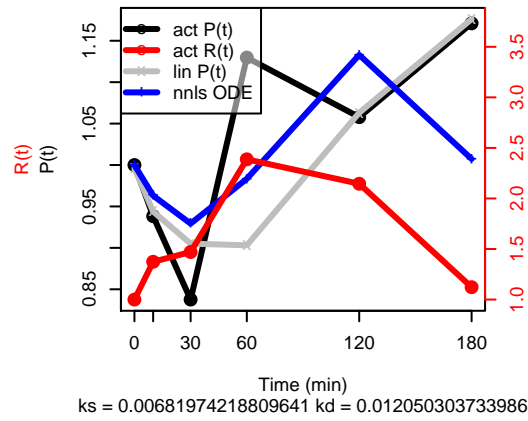

SPAC821.05

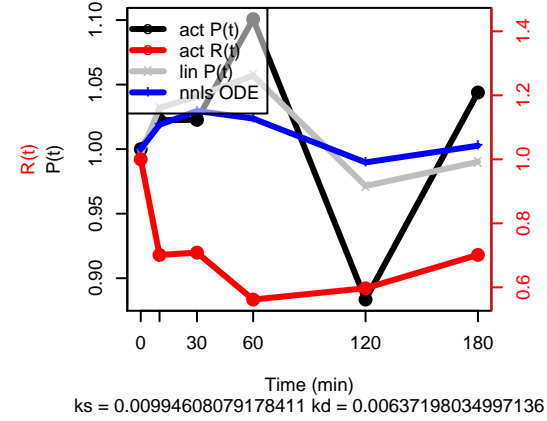

SPAC890.04c

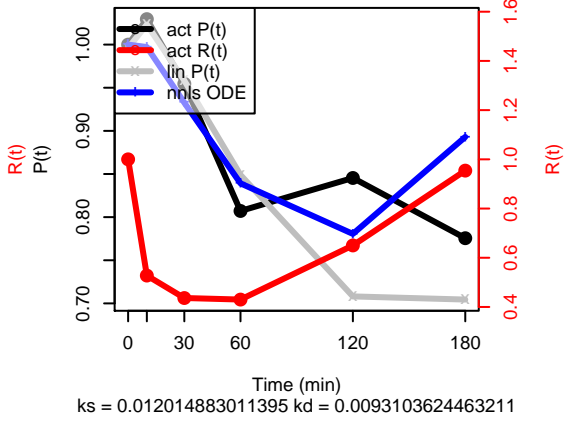

SPAC8C9.04

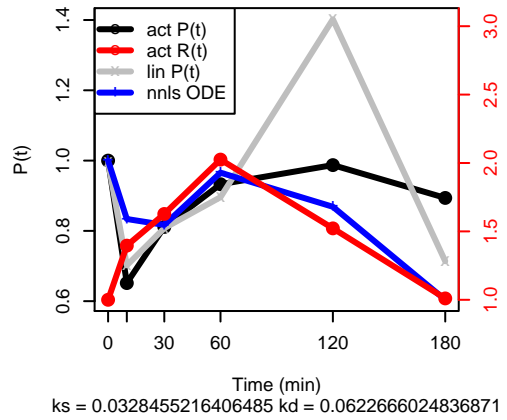

SPAC9.07c

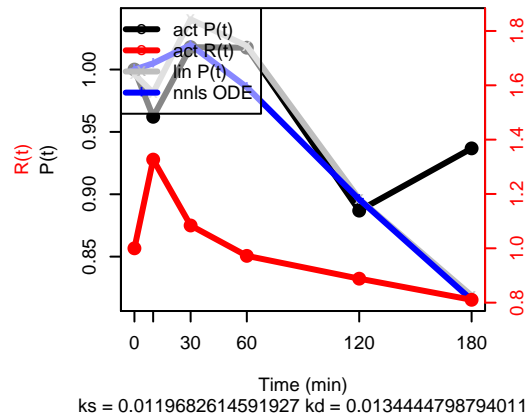

SPAC9G1.06c

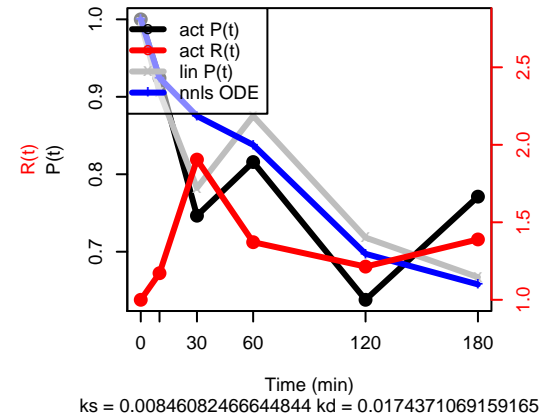

SPAP8A3.06

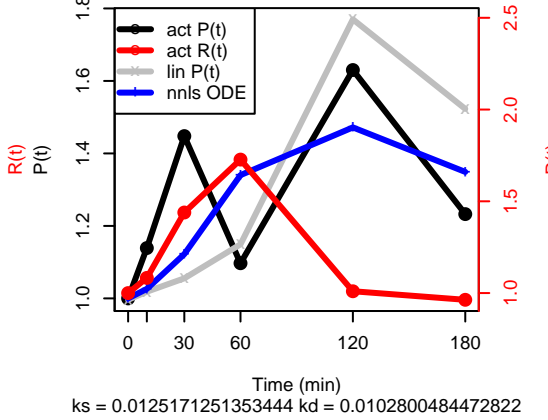

SPAP8A3.07c

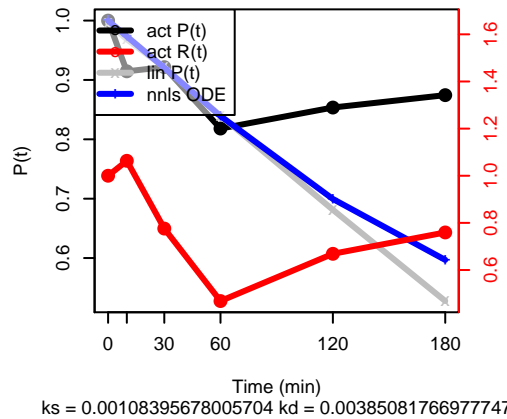

SPBC1289.07c

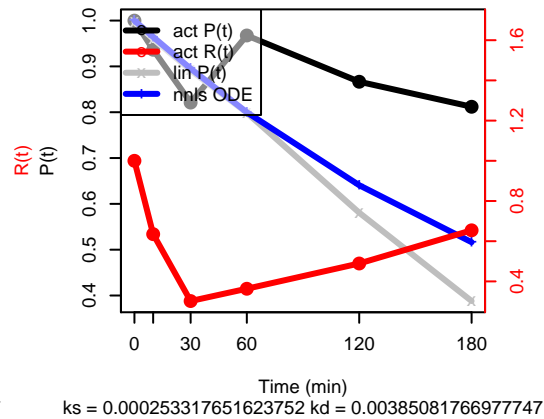

SPBC12C2.06

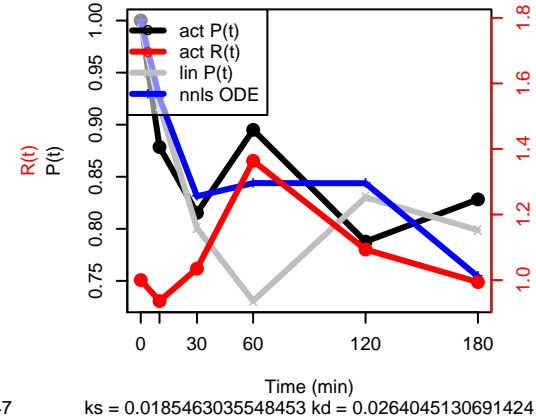

SPBC1347.04

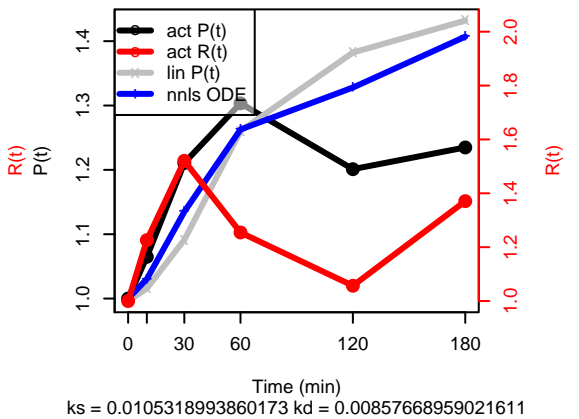



SPBC13E7.04

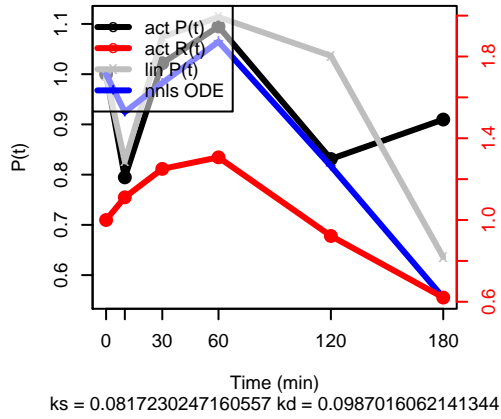

SPBC14C8.04

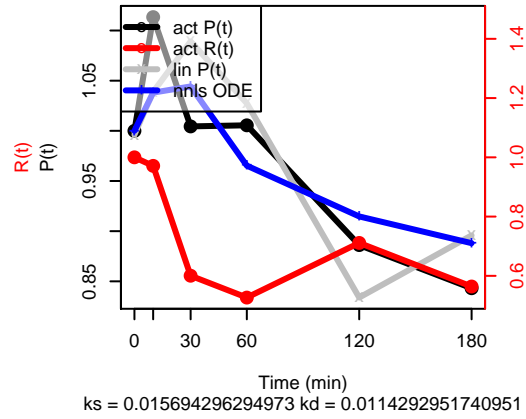

SPBC1709.07

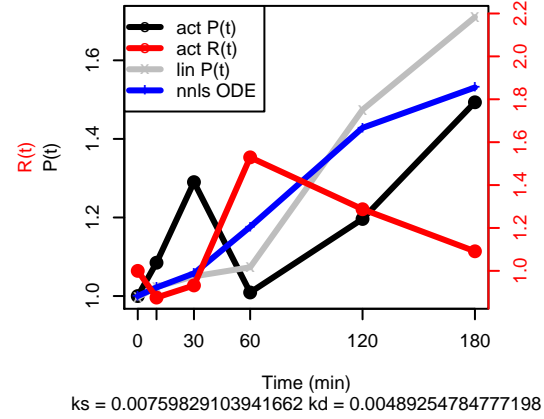

SPBC1718.03

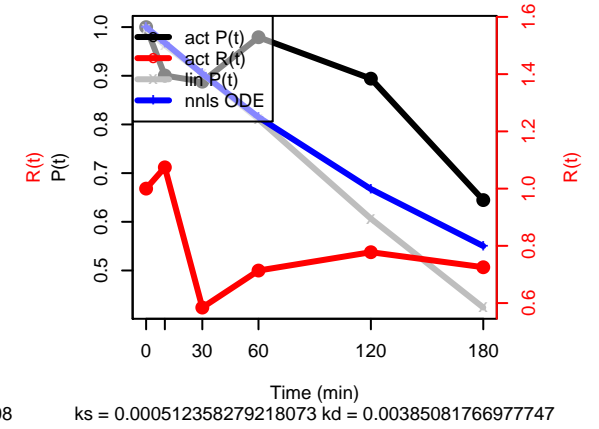

SPBC1778.06c

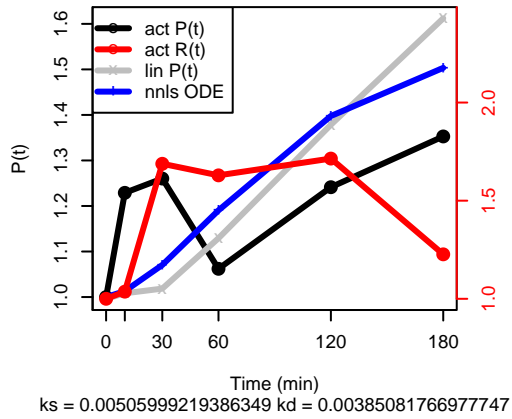

SPBC17A3.05c

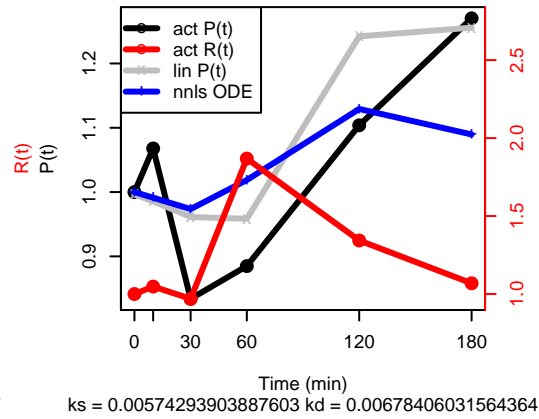

SPBC17A3.07

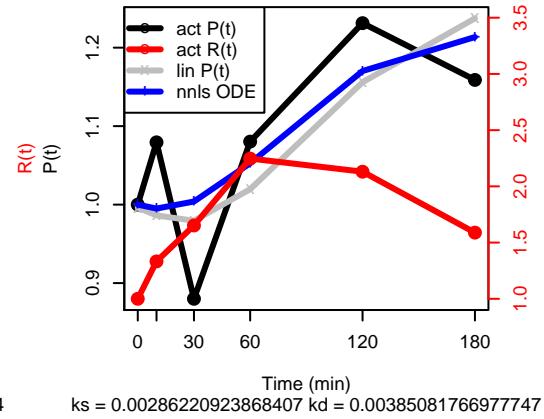

SPBC17D11.05

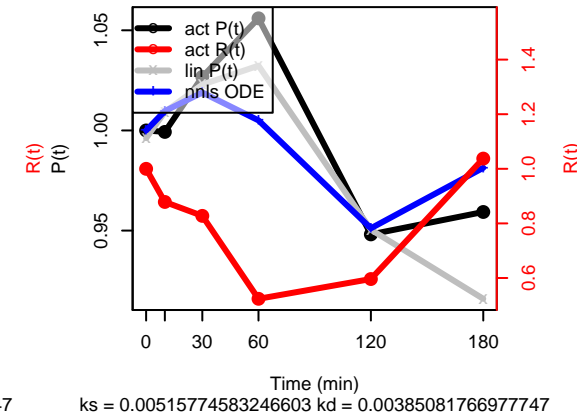

SPBC18H10.14

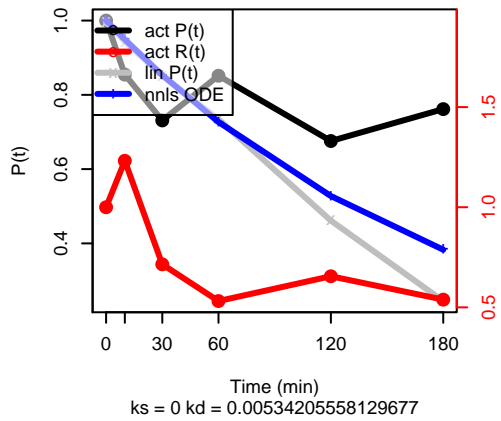

SPBC215.10

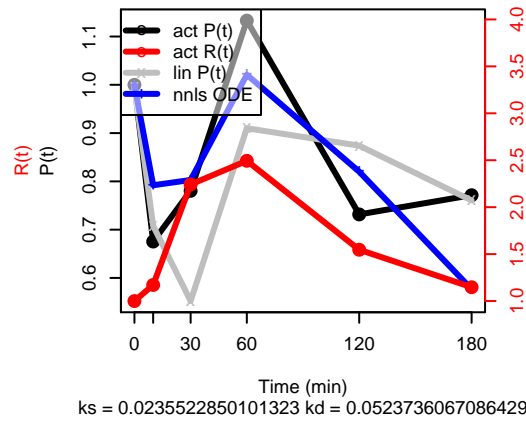

SPBC21C3.11

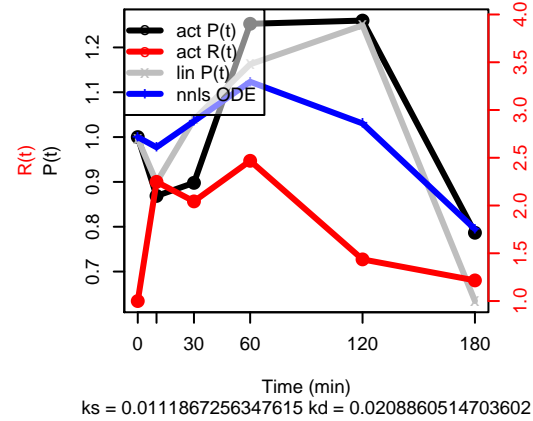

SPBC23E6.07c

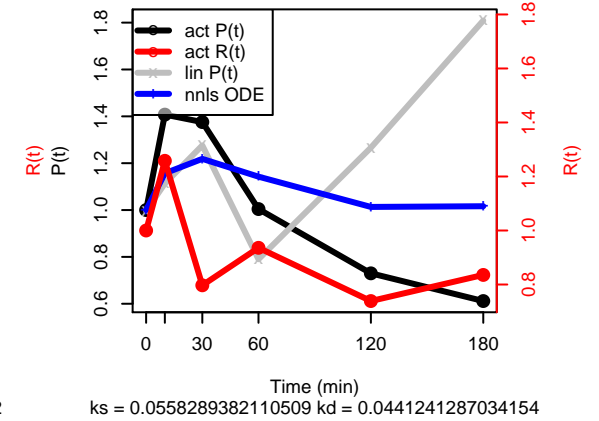

SPBC23G7.08c

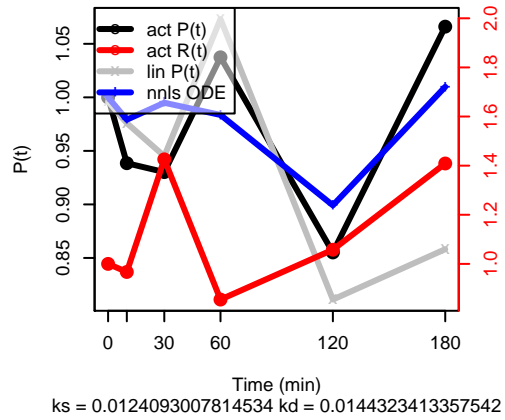

SPBC25B2.09c

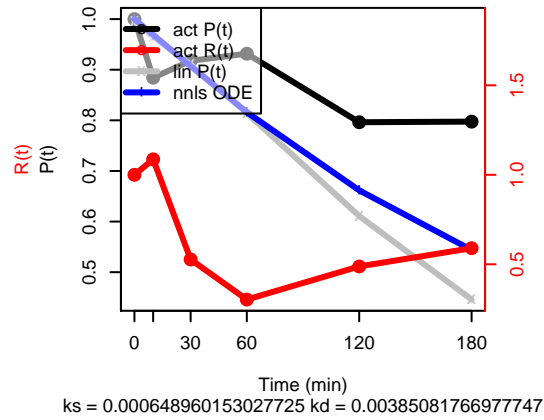

SPBC26H8.03

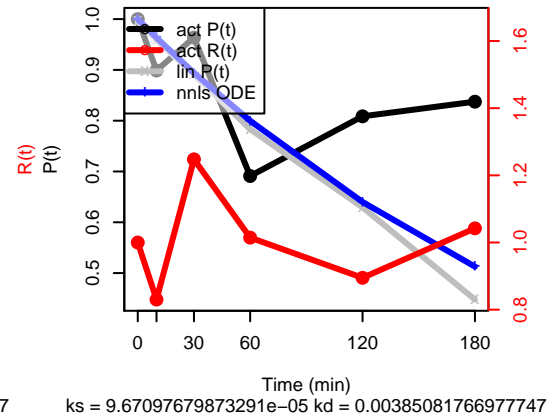

SPBC27B12.11c

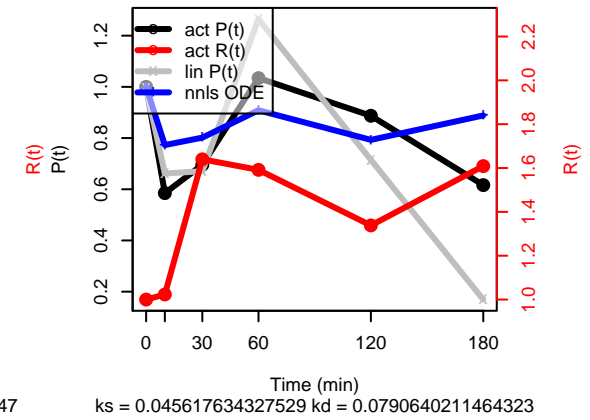

SPBC2D10.12

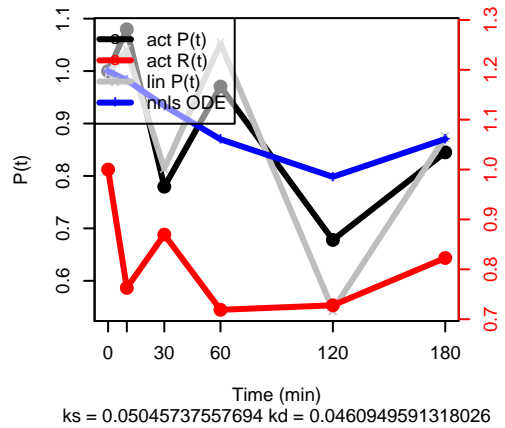

SPBC2F12.14c

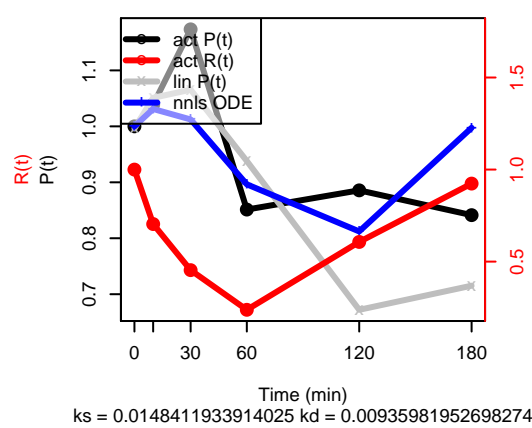

SPBC2G2.12

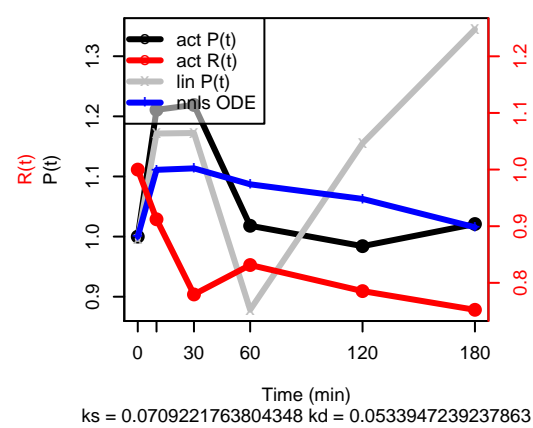

SPBC337.15c

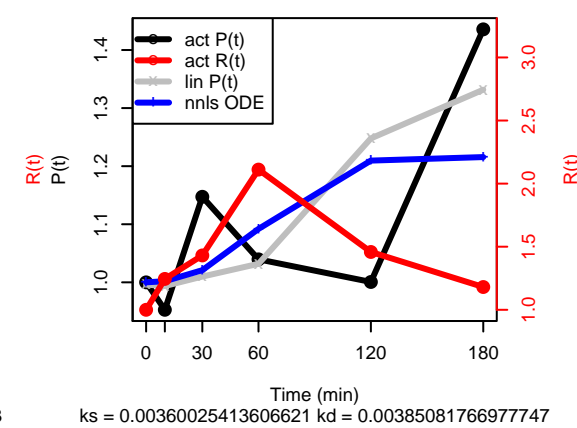

SPBC354.02c

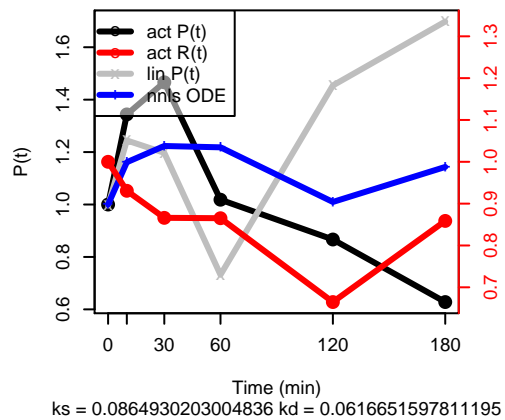

SPBC8E4.03

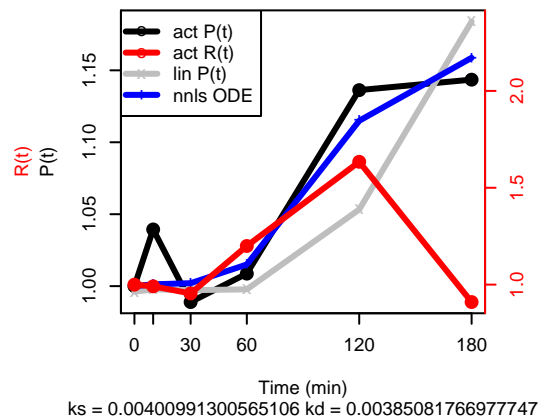

SPBP8B7.03c

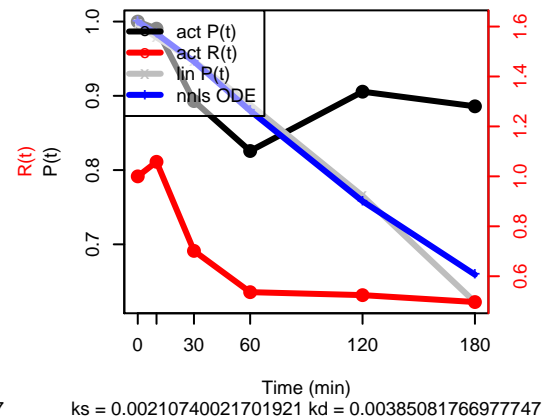

SPCC1020.07

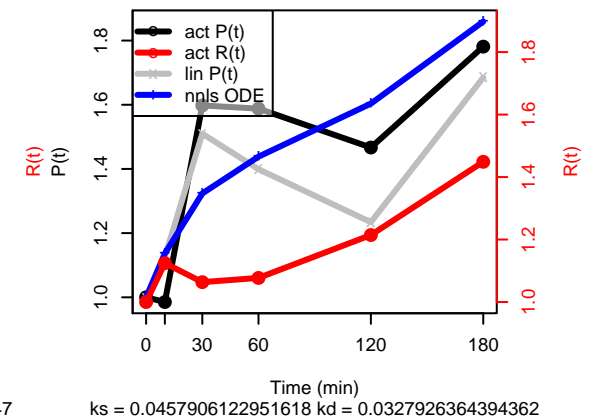

SPCC1223.05c

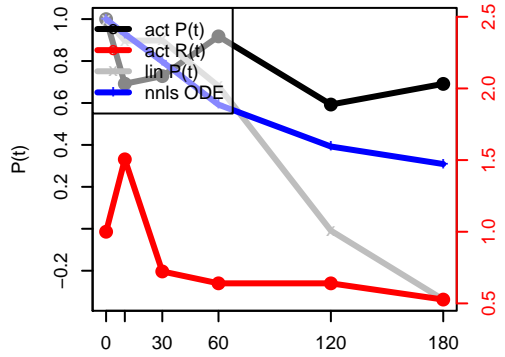

Time (min)  
ks = 0.00853153658750676 kd = 0.0184600456574297

SPCC1223.09

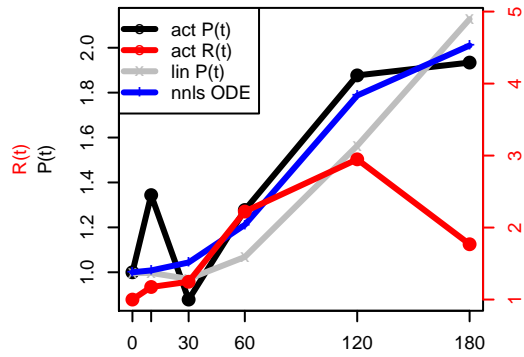

Time (min)  
ks = 0.00861513508226691 kd = 0.00852373140476281

SPCC1235.15

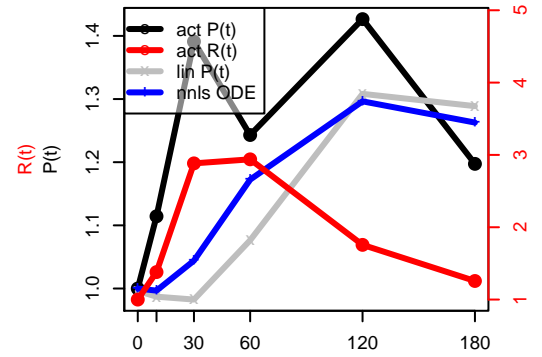

Time (min)  
ks = 0.00294333388370808 kd = 0.00385081766977747

SPCC126.12

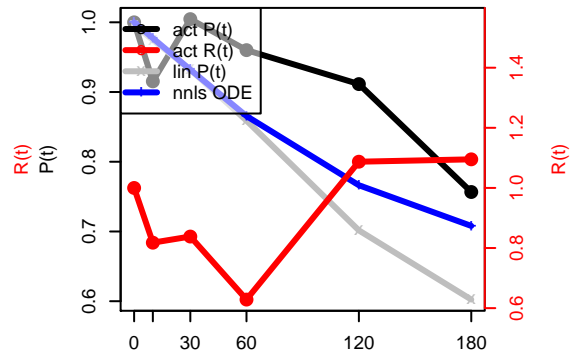

Time (min)  
ks = 0.00170719560426465 kd = 0.00385081766977747

SPCC1322.04

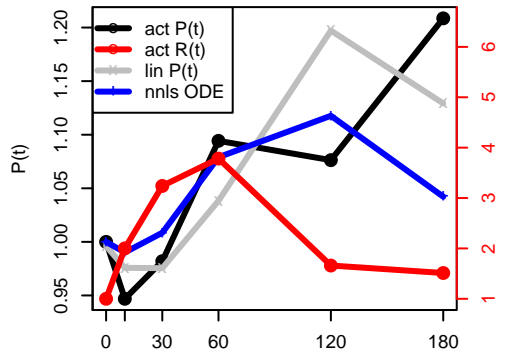

Time (min)  
ks = 0.00181374404169735 kd = 0.00385081766977747

SPCC1442.14c

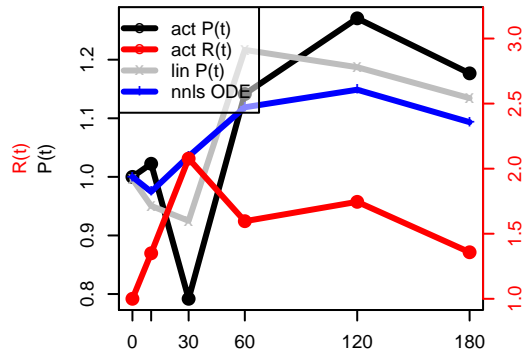

Time (min)  
ks = 0.0103752870490055 kd = 0.0149424620430491

SPCC16A11.16c

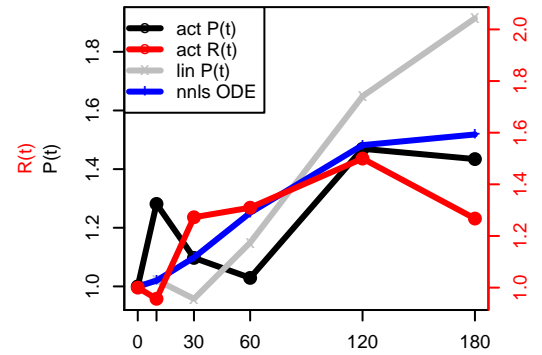

Time (min)  
ks = 0.0201475192023173 kd = 0.0175520206830603

SPCC18.13

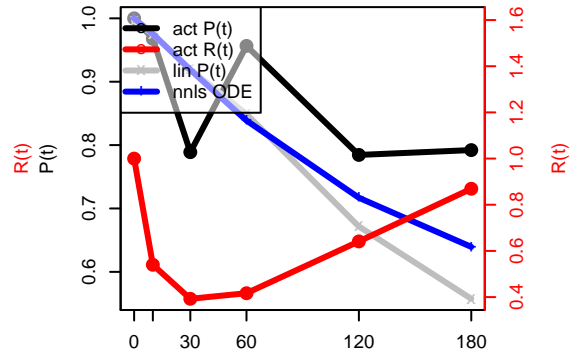

Time (min)  
ks = 0.00174653753121239 kd = 0.00385081766977747

SPCC18.17c

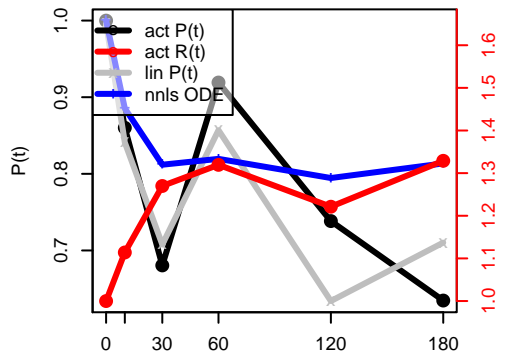

Time (min)  
ks = 0.0263670083337744 kd = 0.0418929820878007

SPCC188.07

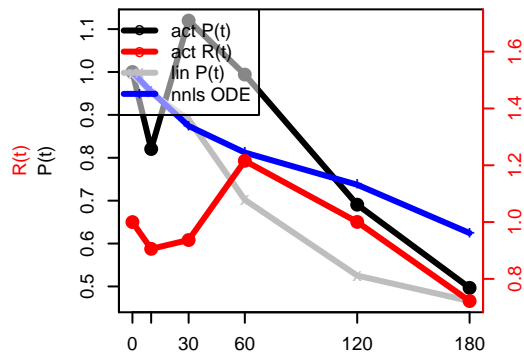

Time (min)  
ks = 0.00678981454187809 kd = 0.0112657350280314

SPCC18B5.07c

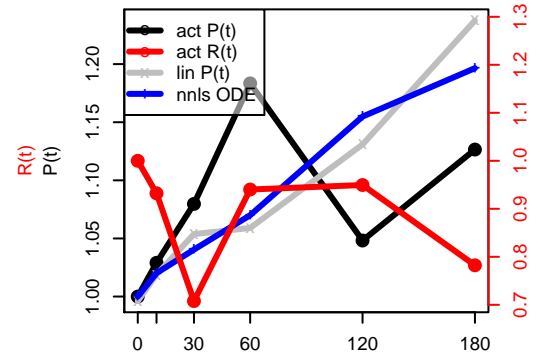

Time (min)  
ks = 0.00612130291208546 kd = 0.00385081766977747

SPCC417.08

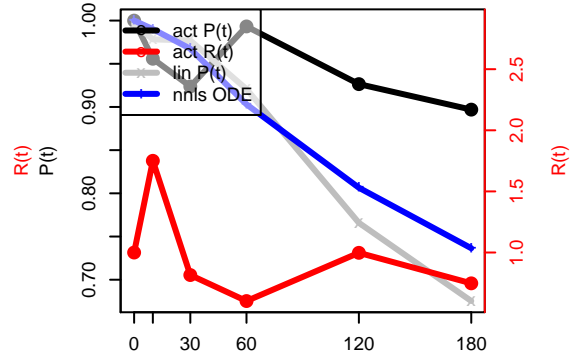

Time (min)  
ks = 0.00206351830023978 kd = 0.00385081766977747

SPCC576.15c

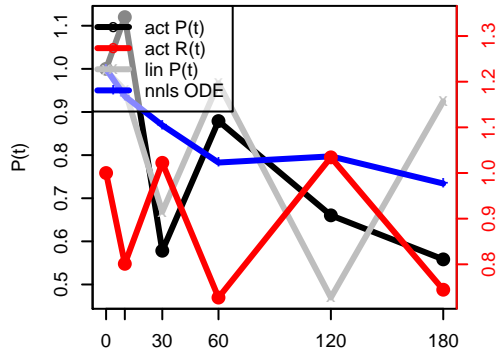

Time (min)  
ks = 0.0282939931617197 kd = 0.0328330574417774

SPCC736.15

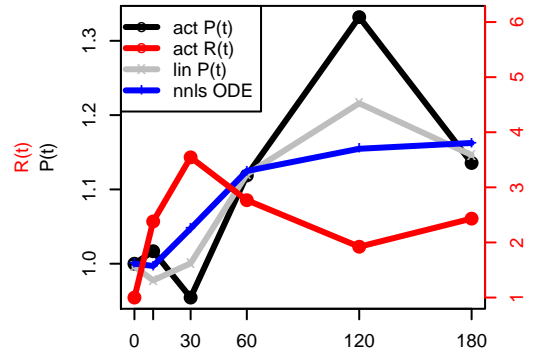

Time (min)  
ks = 0.00222781544305381 kd = 0.00408757526657626

SPCC794.07

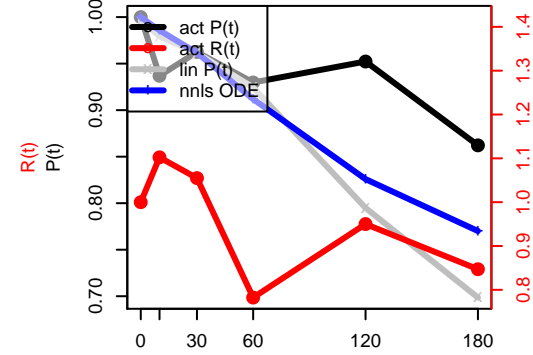

Time (min)  
ks = 0.00406827510373062 kd = 0.00574407212659572

SPCC970.03

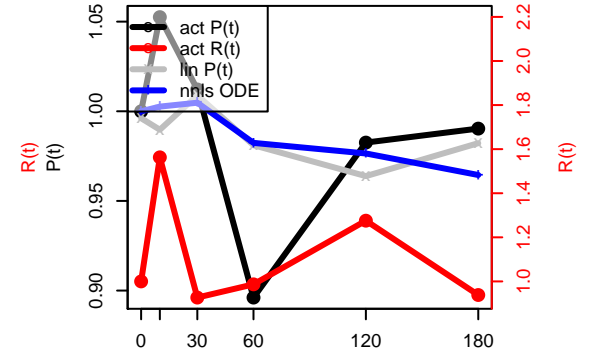

Time (min)  
ks = 0.00320620503221164 kd = 0.00385081766977747

SPCP31B10.04

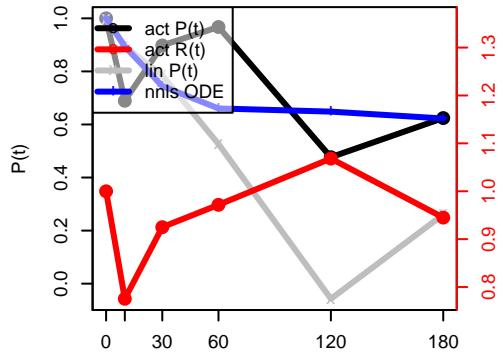

Time (min)  
ks = 0.017097030654678 kd = 0.0272176721111911

SPAC1002.17c

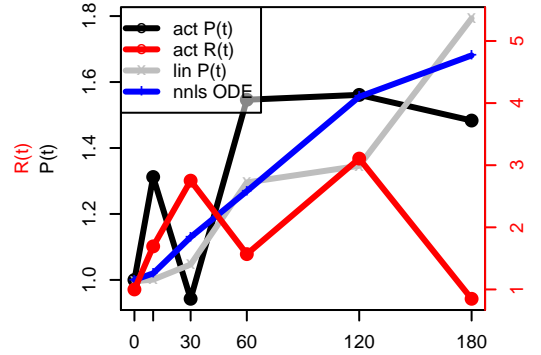

Time (min)  
ks = 0.00433320314035042 kd = 0.00385081766977747

SPAC1039.02

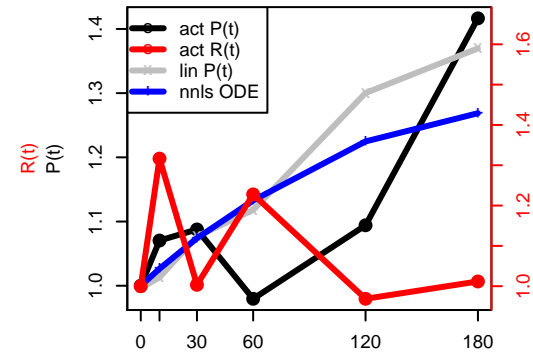

Time (min)  
ks = 0.00554576756209644 kd = 0.00385081766977747

SPAC1039.06

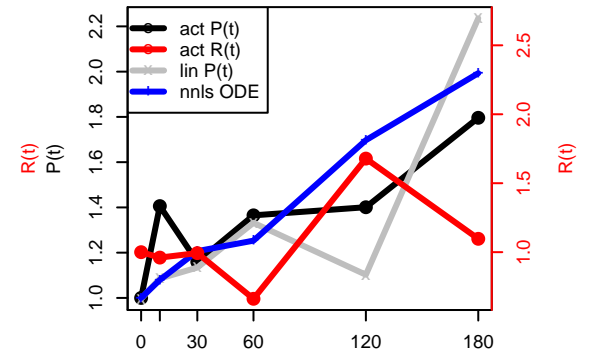

Time (min)  
ks = 0.0228264355932837 kd = 0.0138716025685783

SPAC105.02c

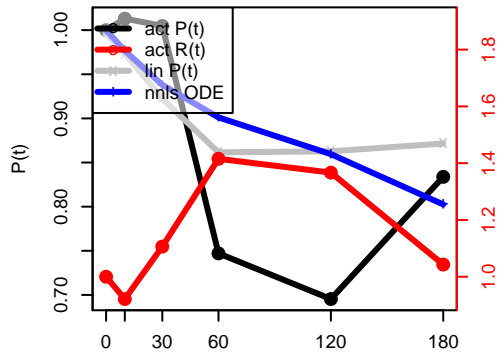

Time (min)  
ks = 0.00257977986641779 kd = 0.00486028851527953

SPAC1071.07c

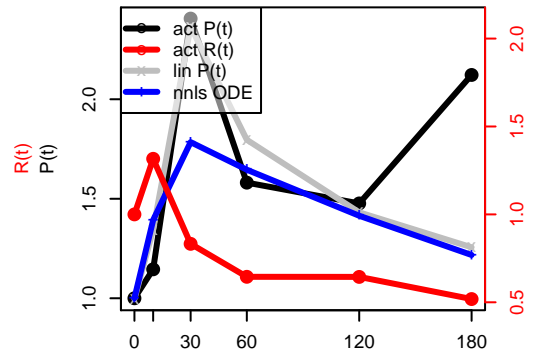

Time (min)  
ks = 0.0653025171660633 kd = 0.0304838431168851

SPAC16C9.06c

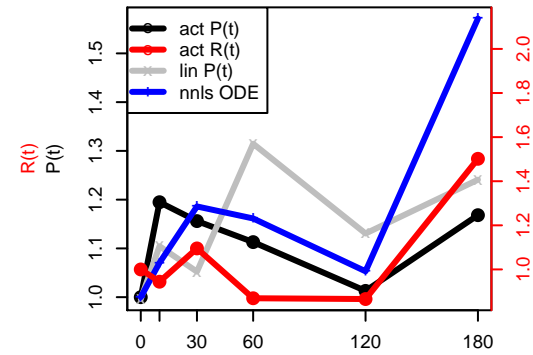

Time (min)  
ks = 0.0620505234675581 kd = 0.0512254337546842

SPAC17C9.08

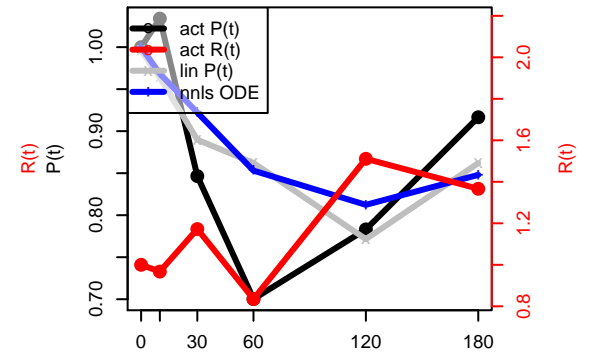

Time (min)  
ks = 0.00554178919617887 kd = 0.00876605032296442

SPAC1952.08c

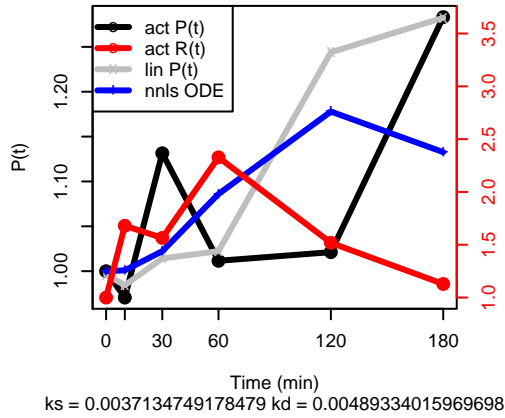

SPAC19A8.05c

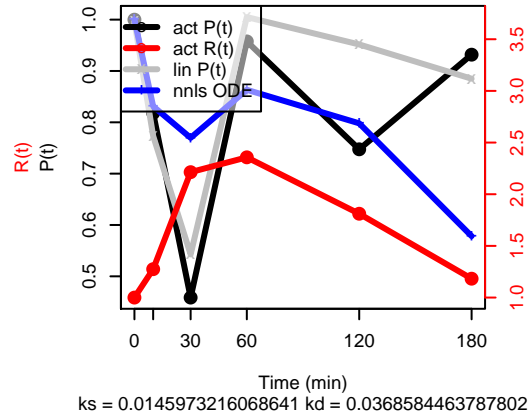

SPAC19D5.05c

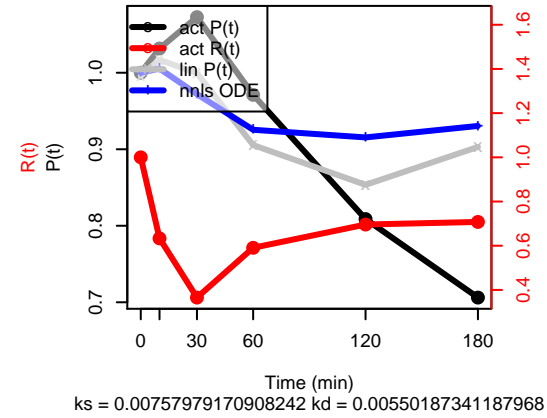

SPAC19G12.06c

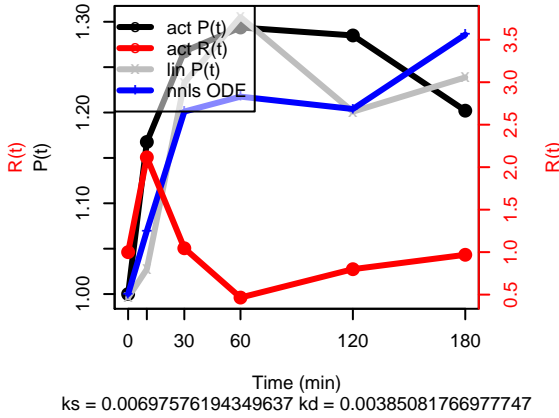

SPAC19G12.14

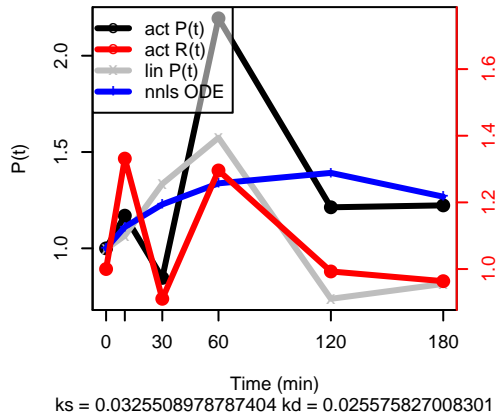

SPAC20G4.08

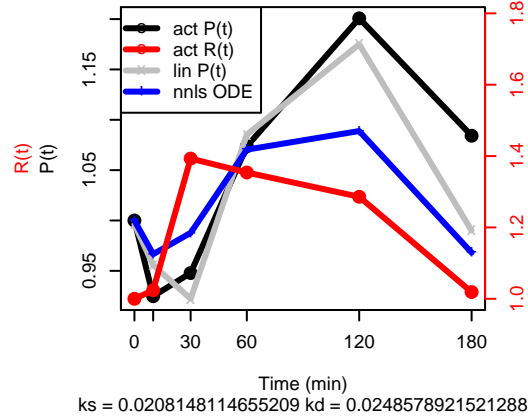

SPAC20H4.10

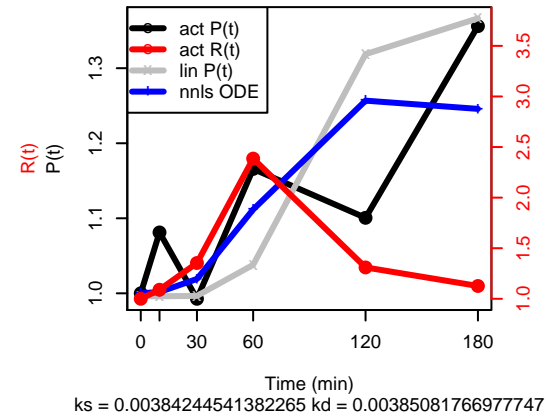

SPAC222.03c

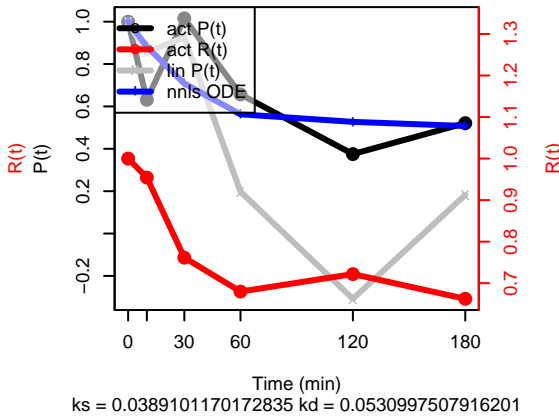

SPAC23D3.07

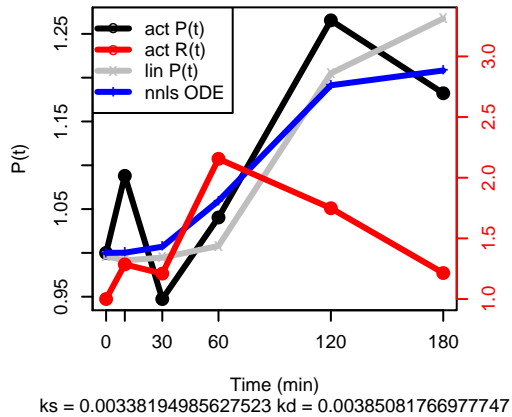

SPAC23G3.02c

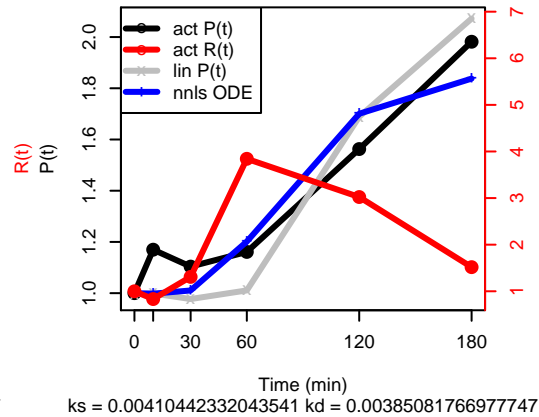

SPAC24C9.14

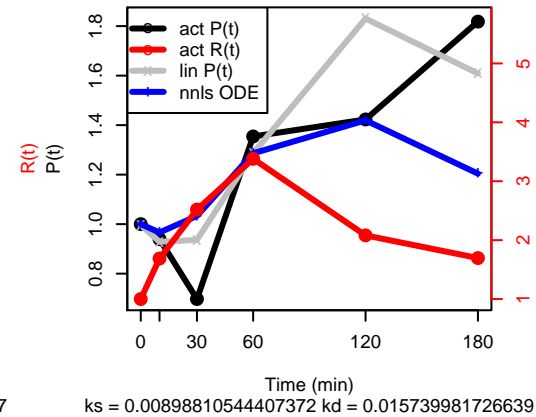

SPAC29A4.04c

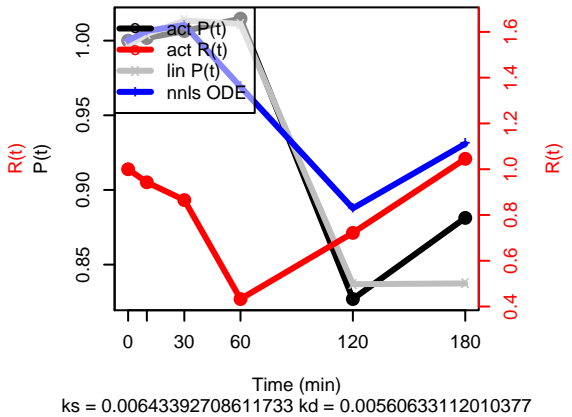

SPAC2E1P5.05

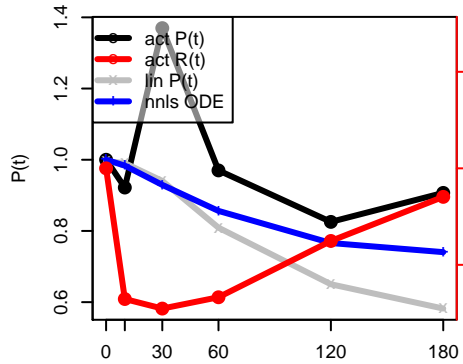

ks = 0.00327268541130235 kd = 0.00385081766977747

SPAC2F3.03c

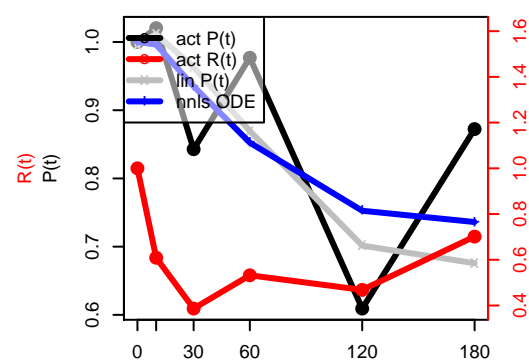

ks = 0.00964360871371122 kd = 0.00812017612610451

SPAC30D11.03

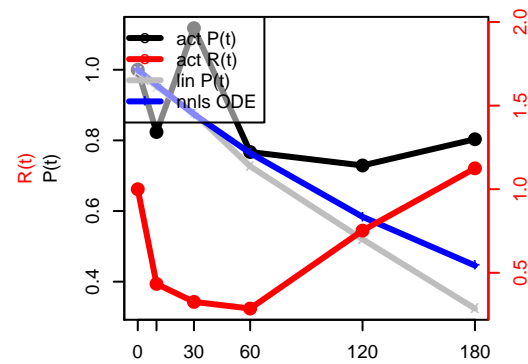

ks = 0 kd = 0.00448832433707141

SPAC30D11.12

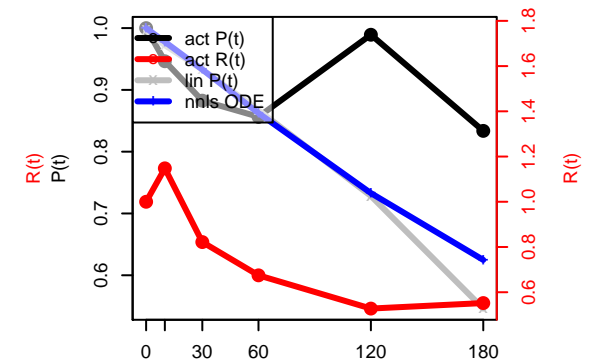

ks = 0.00146251130948803 kd = 0.00385081766977747

SPAC31A2.02

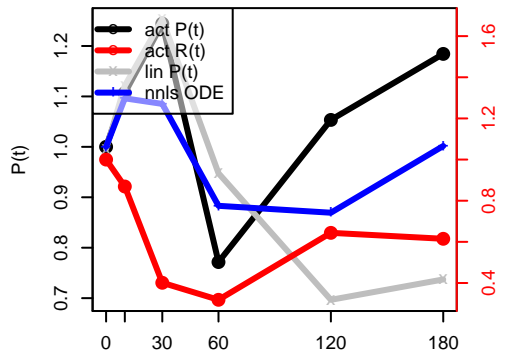

ks = 0.0305091768189235 kd = 0.0180086728448765

SPAC3A11.12c

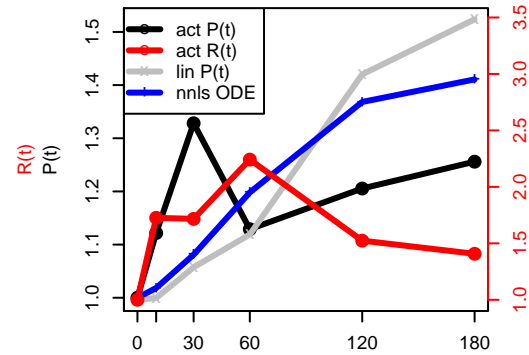

ks = 0.00417844035110046 kd = 0.00385081766977747

SPAC3C7.10

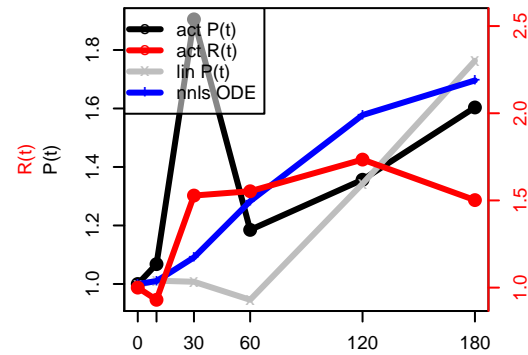

ks = 0.0131062121844123 kd = 0.0115921983557188

SPAC3G9.04

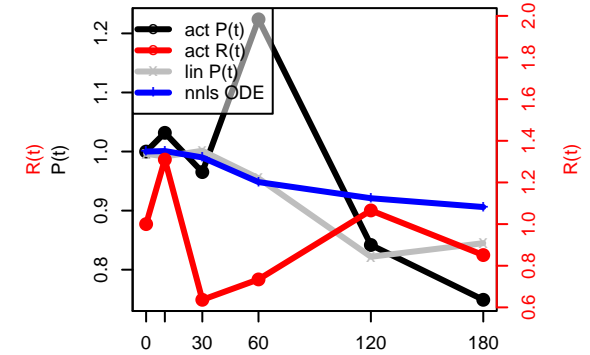

ks = 0.00340166376427748 kd = 0.00385081766977747

SPAC5H10.06c

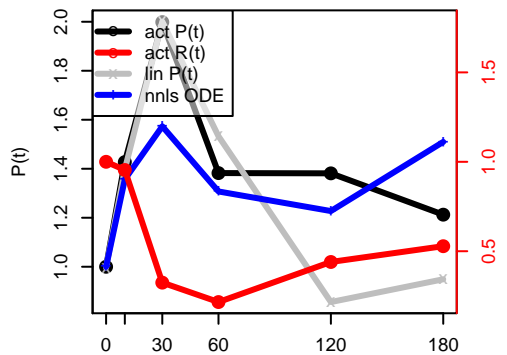

ks = 0.0571874021620442 kd = 0.0170890562327193

SPAC6F12.07

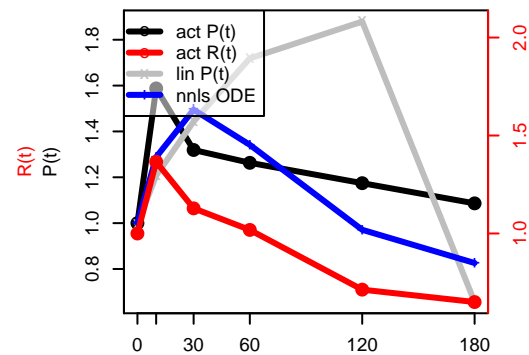

ks = 0.0980656398434449 kd = 0.0769321595878534

SPAC6G10.09

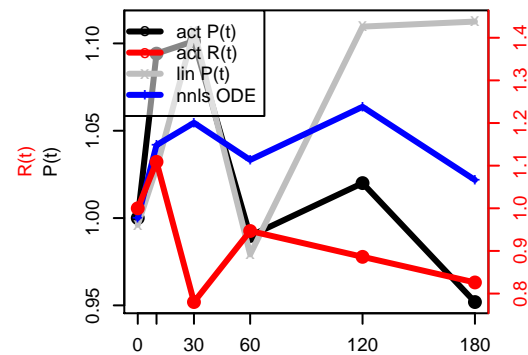

ks = 0.0244639725485718 kd = 0.021206651281808

SPAC8E11.04c

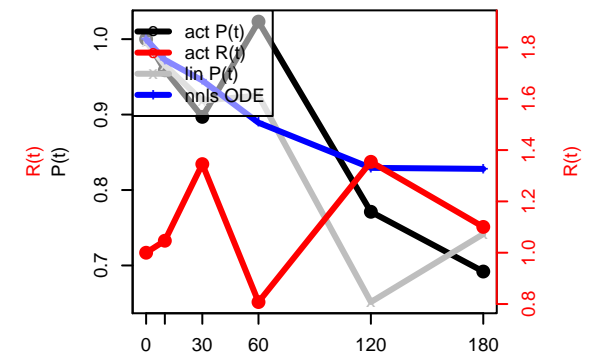

ks = 0.00662380582724742 kd = 0.00968566286262216

SPAC9G1.03c

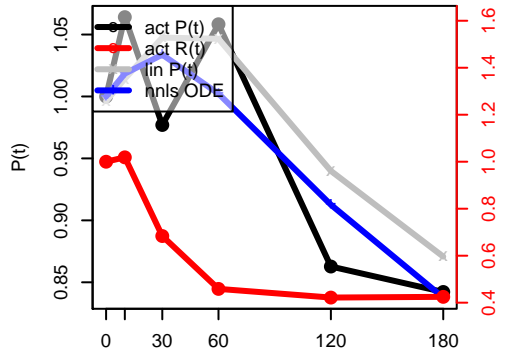

Time (min)  
ks = 0.00617975441329288 kd = 0.00435802395350419

SPACUNK4.12c

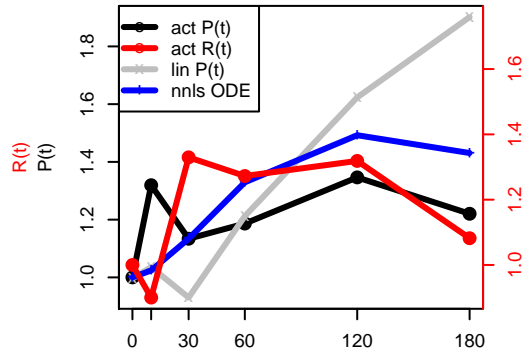

Time (min)  
ks = 0.0250655155241173 kd = 0.0211060339776331

SPAP14E8.03

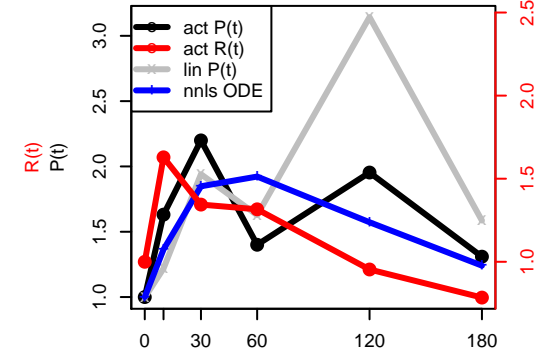

Time (min)  
ks = 0.0694206198021608 kd = 0.0471802738021327

SPAPJ760.02c

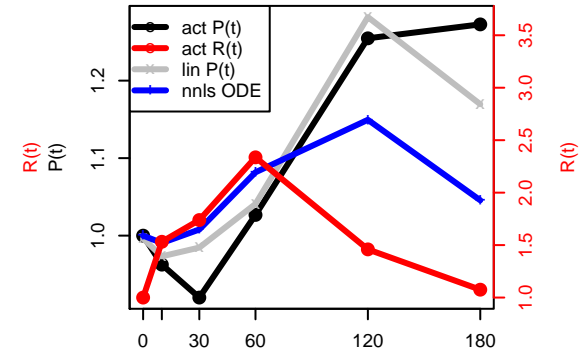

Time (min)  
ks = 0.00485974350100564 kd = 0.00714598857939003

SPBC1105.03c

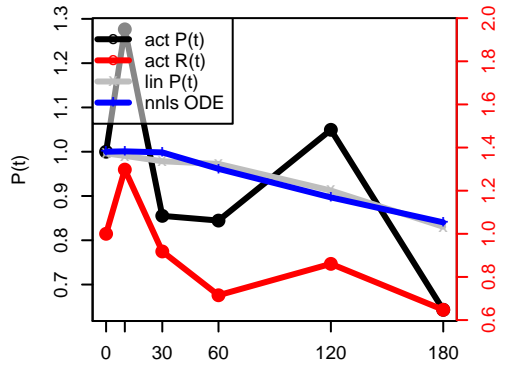

Time (min)  
ks = 0.00417271700437816 kd = 0.00471947808407468

SPBC1105.04c

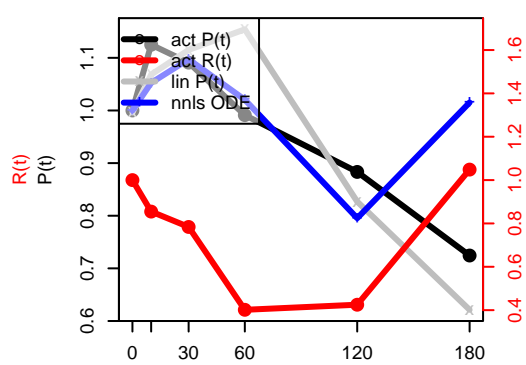

Time (min)  
ks = 0.021381183385229 kd = 0.0141672841146587

SPBC1198.02

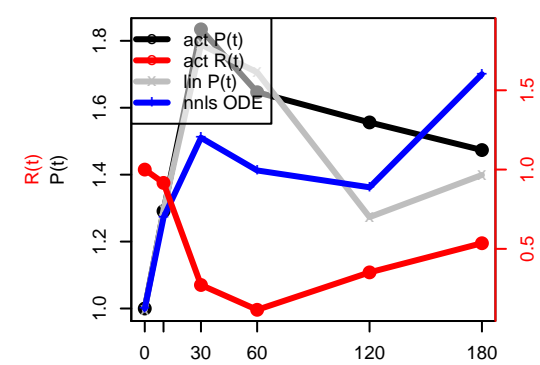

Time (min)  
ks = 0.0367933755290802 kd = 0.00696496161808179

SPBC1289.09

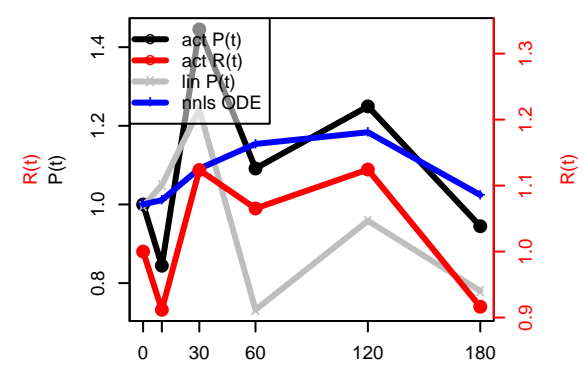

Time (min)  
ks = 0.0765796012852007 kd = 0.0712869326352369

SPBC13G1.11

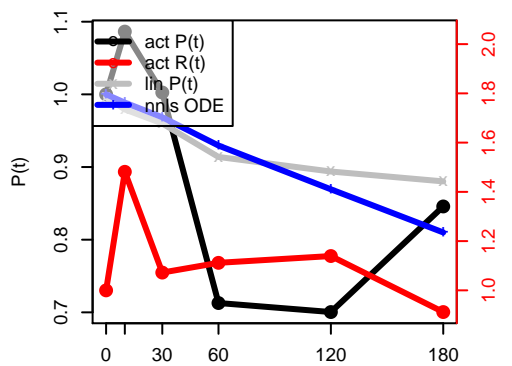

Time (min)  
ks = 0.00216878528897504 kd = 0.00385081766977747

SPBC14F5.06

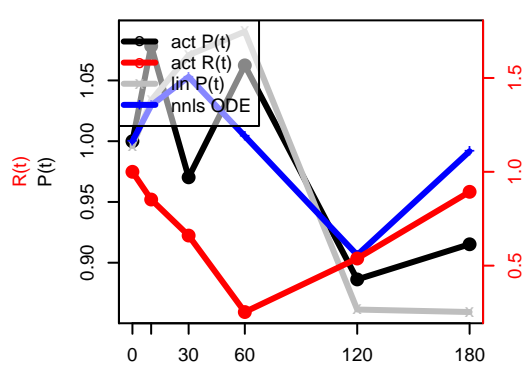

Time (min)  
ks = 0.00961579997129036 kd = 0.00587608513222195

SPBC14F5.09c

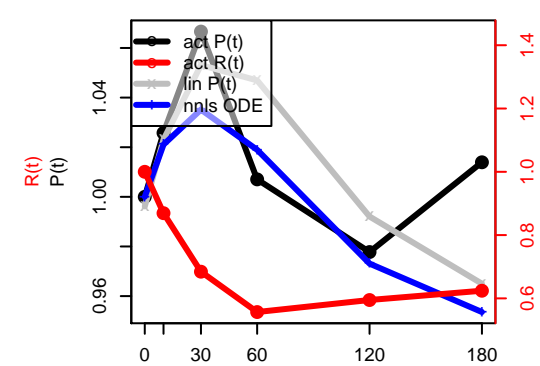

Time (min)  
ks = 0.00805451923995136 kd = 0.00536166072398294

SPBC1711.06

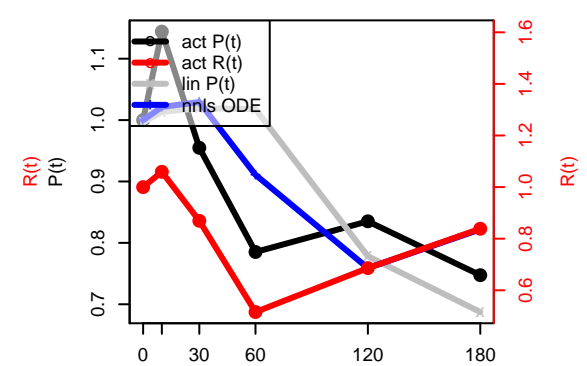

Time (min)  
ks = 0.0198629019558098 kd = 0.0181328621240344



SPBC1734.03

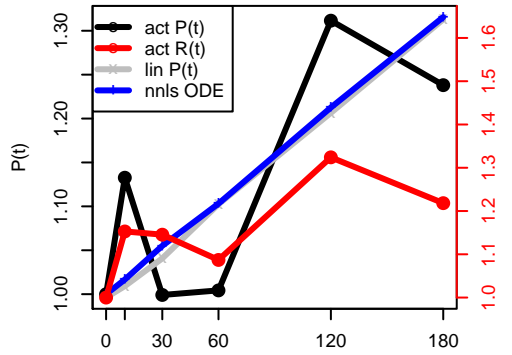

SPBC1734.11

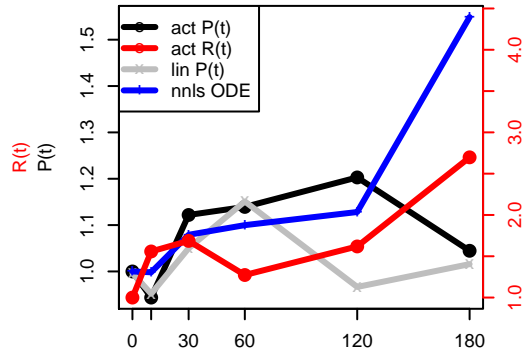

SPBC1773.10c

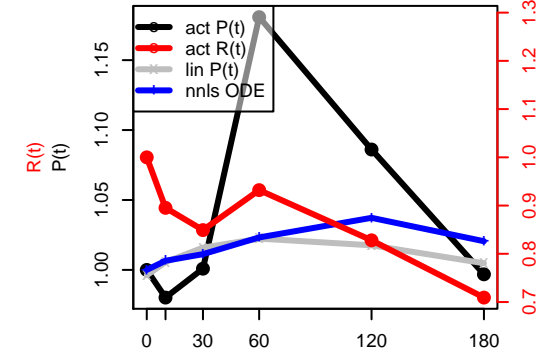

SPBC17D1.03c

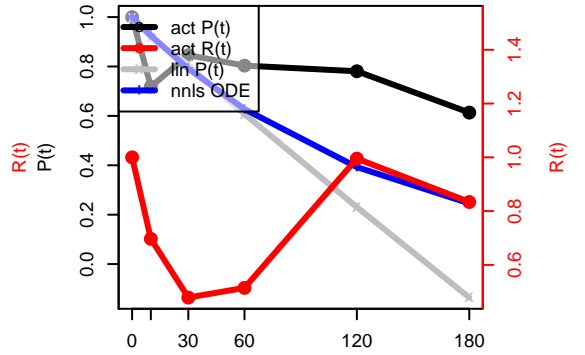

SPBC17D11.07c

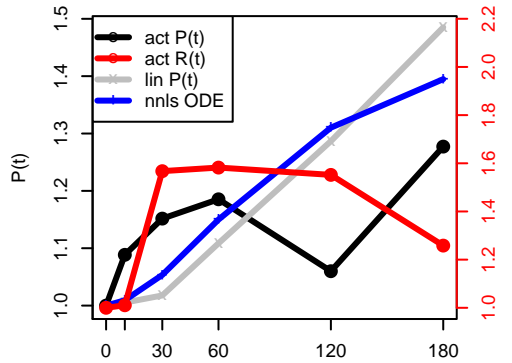

SPBC17G9.12c

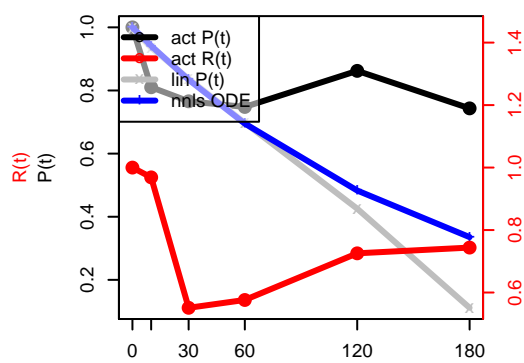

SPBC19C7.10

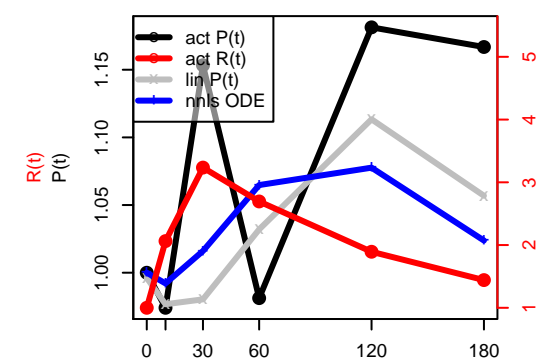

SPBC1D7.04

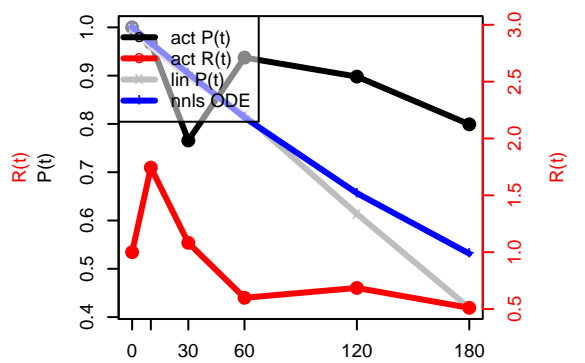

SPBC25D12.03c

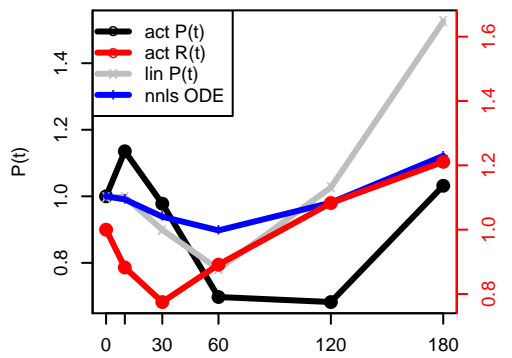

SPBC29A3.10c

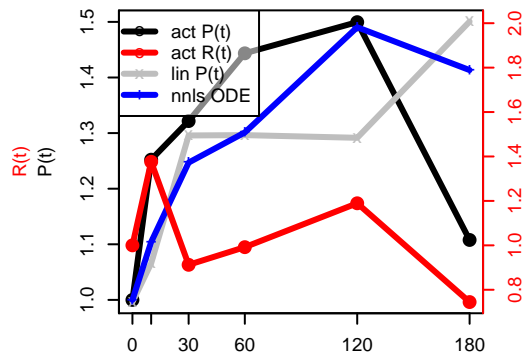

SPBC56F2.12

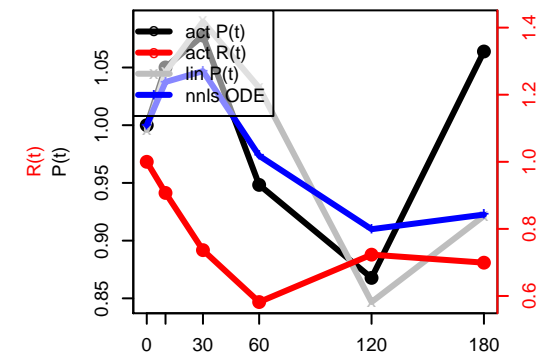

SPBC6B1.10

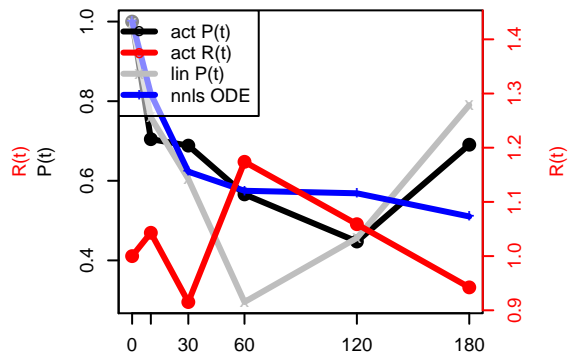

SPBC776.11

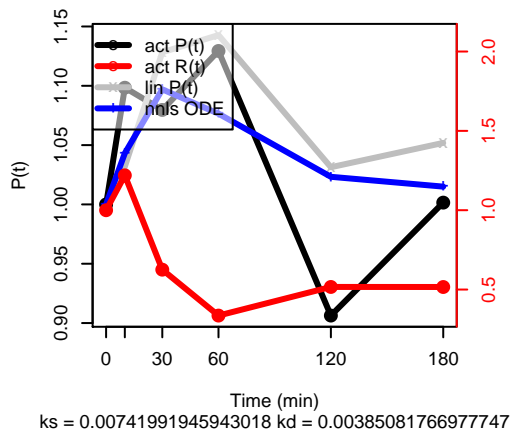

SPBC839.10

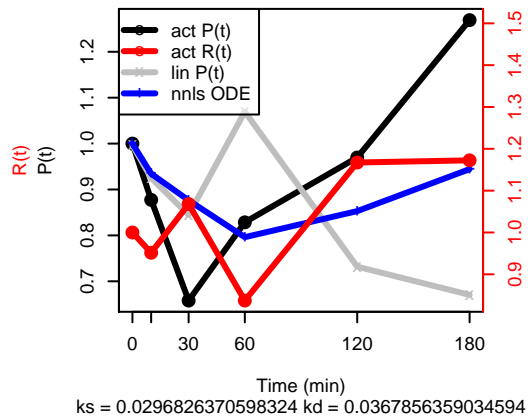

SPBP16F5.06

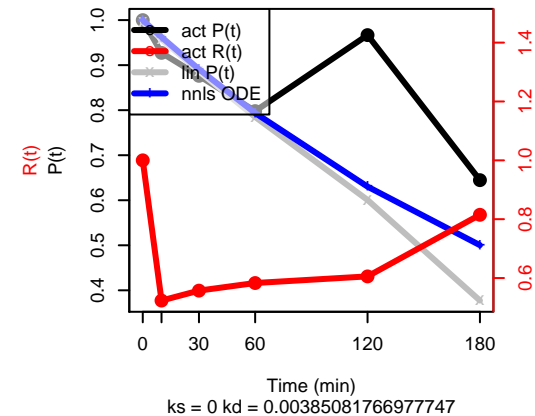

SPBP23A10.16

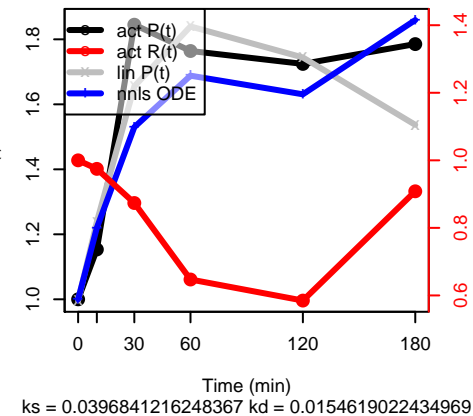

SPBP35G2.14

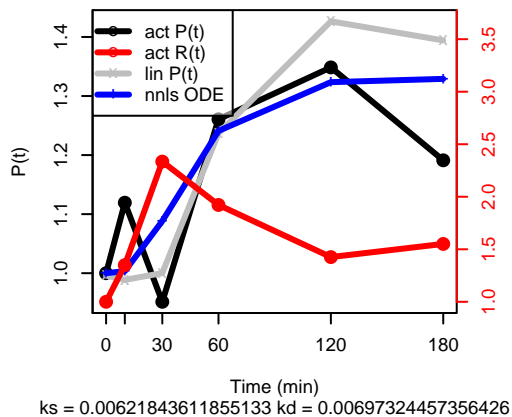

SPBP4H10.08

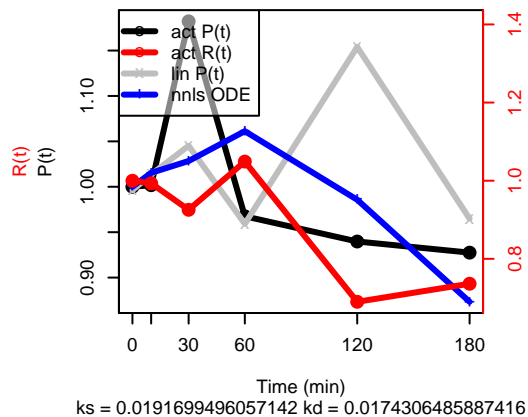

SPBP4H10.11c

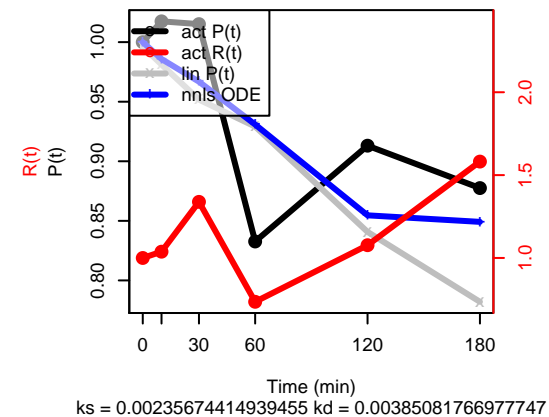

SPBP8B7.09c

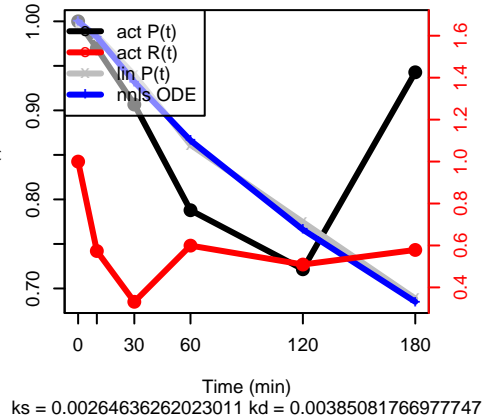

SPBPB2B2.13

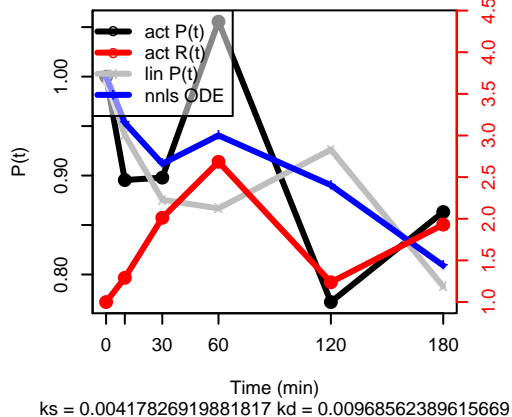

SPBPB7E8.02

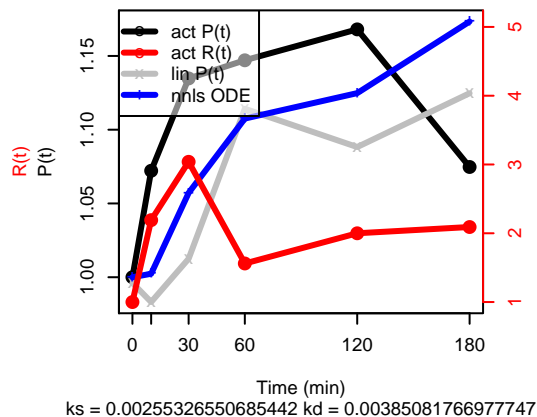

SPCC1795.04c

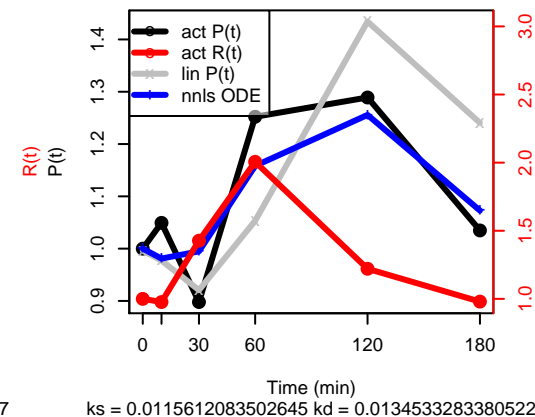

SPCC1827.04

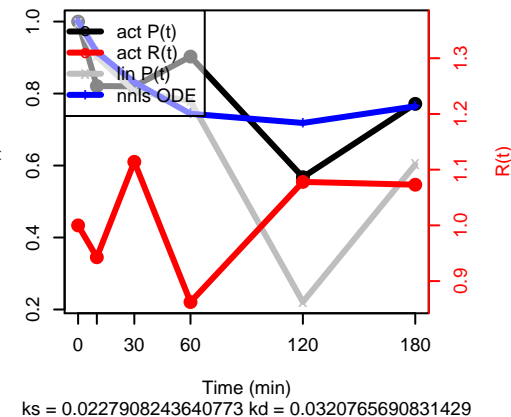

SPCC736.13

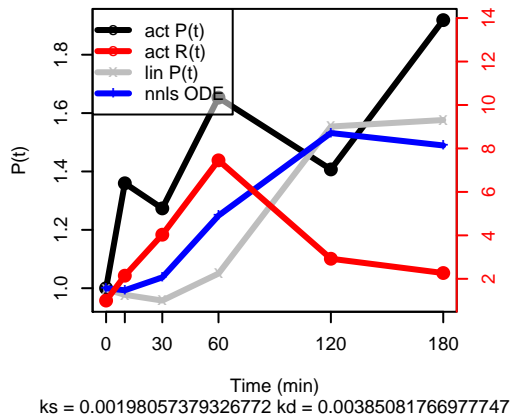

SPCC757.12

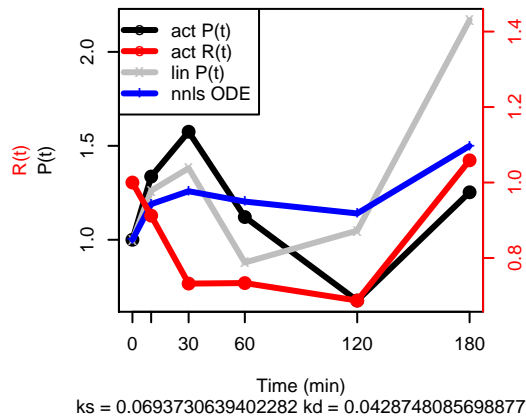

SPCC970.10c

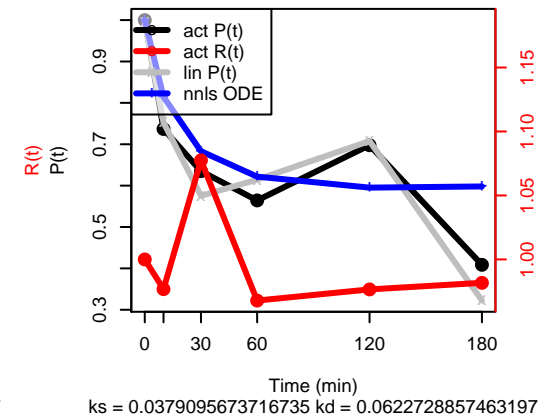

SPCP1E11.04c

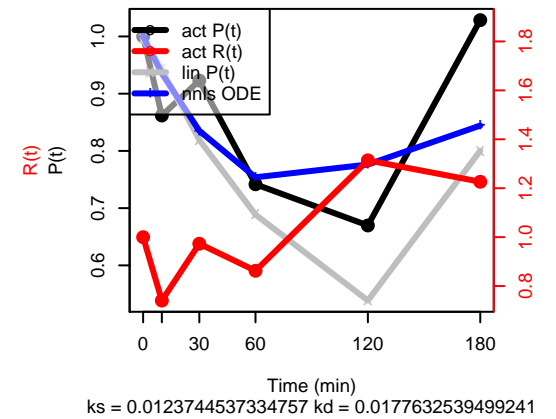

SPCPB16A4.04c

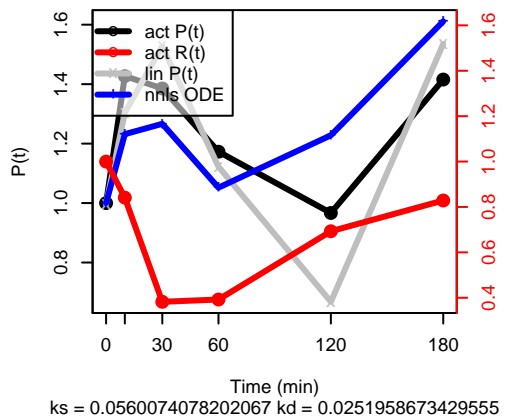

SPAC1002.09c

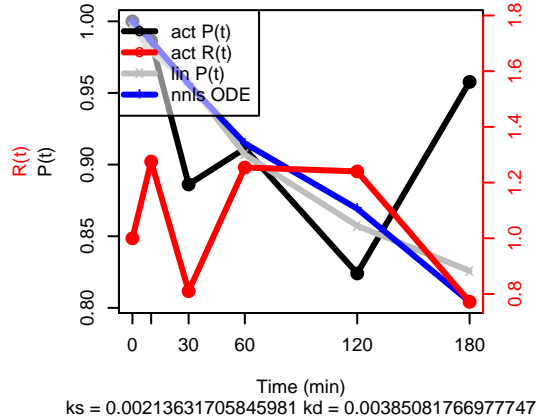

SPAC11E3.04c

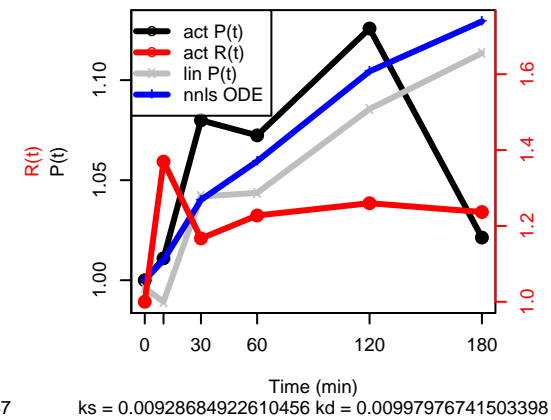

SPAC11E3.11c

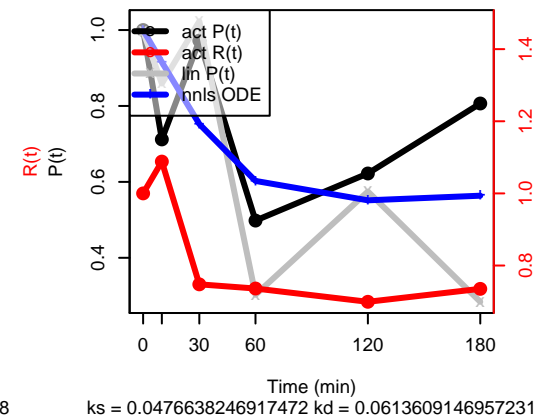

SPAC11E3.14

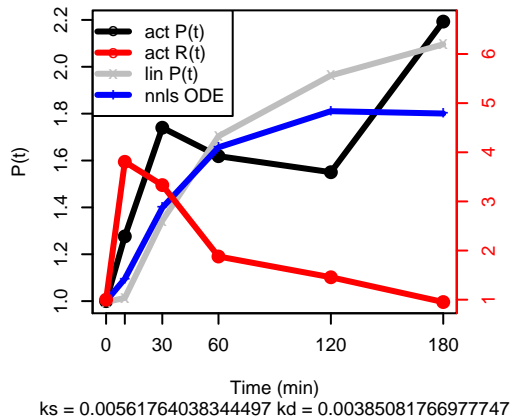

SPAC11G7.02

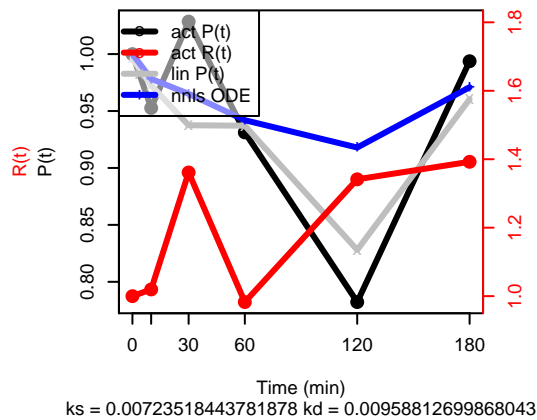

SPAC11G7.03

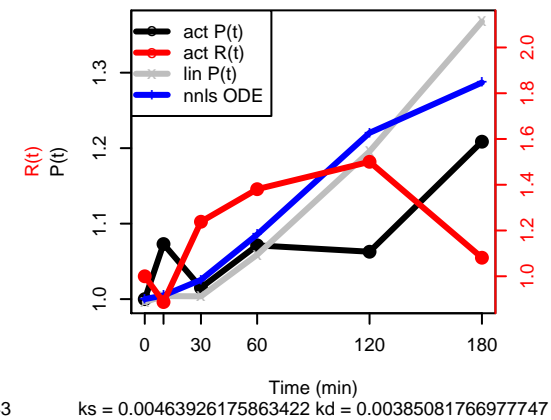

SPAC13G6.09

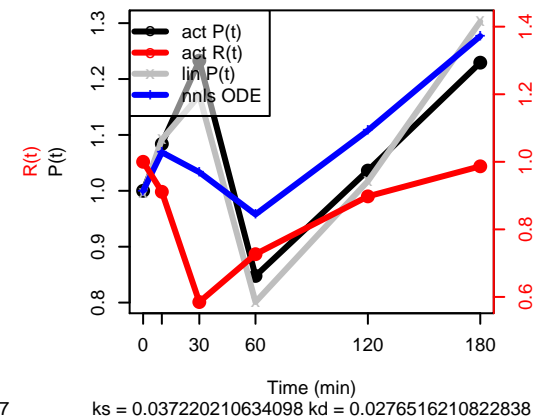

SPAC13G6.14

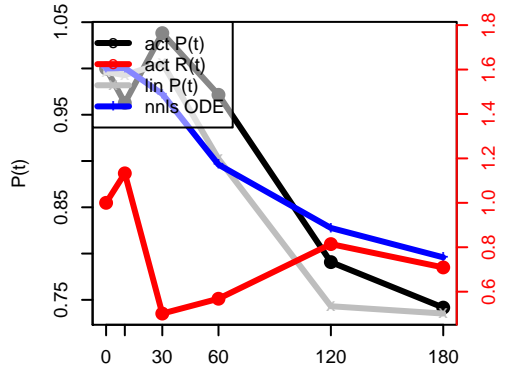

Time (min)  
ks = 0.00576891290629552 kd = 0.00610776169833351

SPAC13G7.05

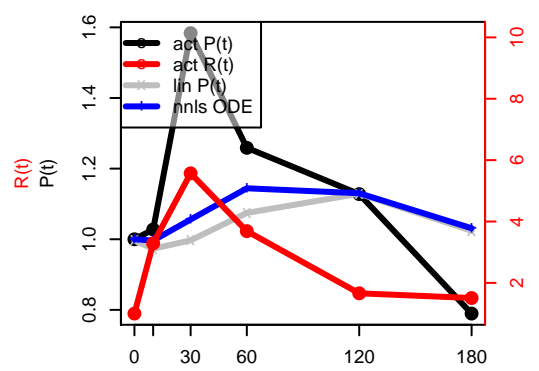

Time (min)  
ks = 0.00156081857007322 kd = 0.00385081766977747

SPAC144.11

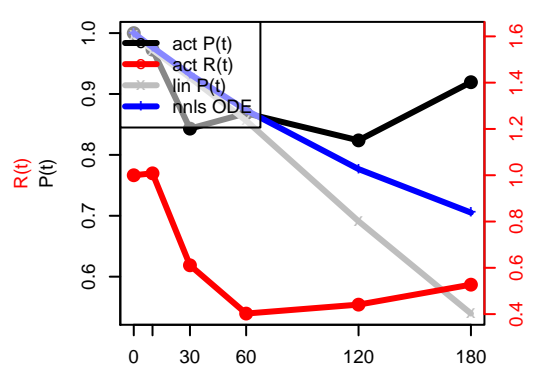

Time (min)  
ks = 0.00146414713664127 kd = 0.00385081766977747

SPAC144.12

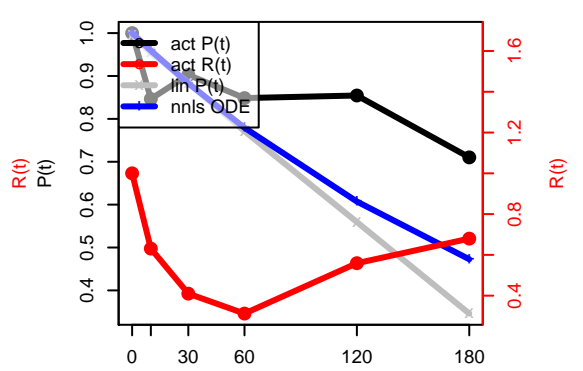

Time (min)  
ks = 0 kd = 0.00416272907772094

SPAC1486.03c

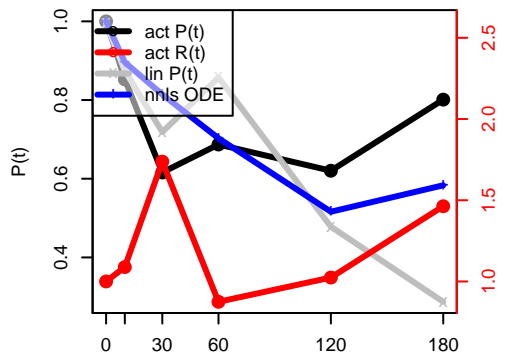

Time (min)  
ks = 0.0107868296162934 kd = 0.0229329984402987

SPAC1635.01

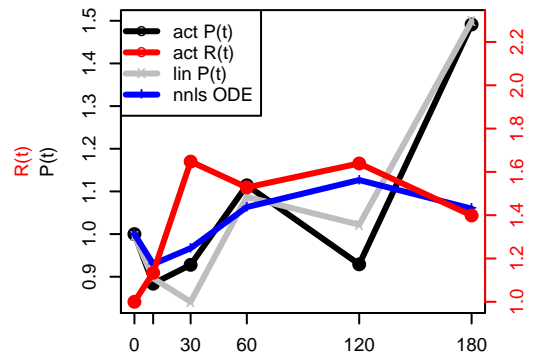

Time (min)  
ks = 0.0242656100362965 kd = 0.0342516295998709

SPAC1782.10c

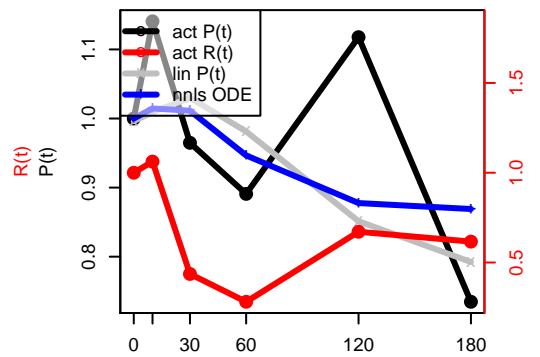

Time (min)  
ks = 0.00544194636236759 kd = 0.00414837044621695

SPAC17C9.03

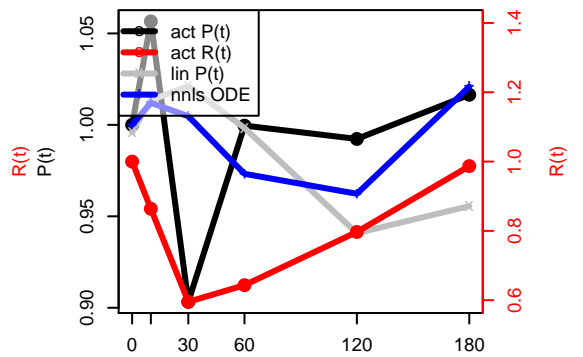

Time (min)  
ks = 0.00756765533818556 kd = 0.00582895043559792

SPAC1805.13

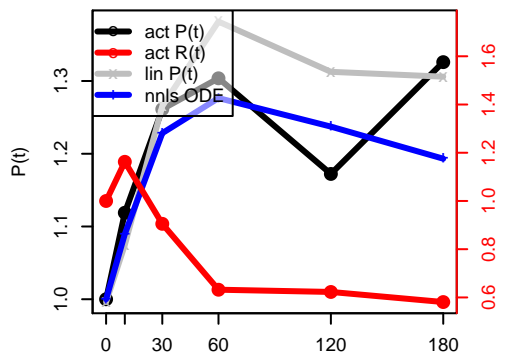

Time (min)  
ks = 0.0169744194023491 kd = 0.00911193551070249

SPAC19A8.12

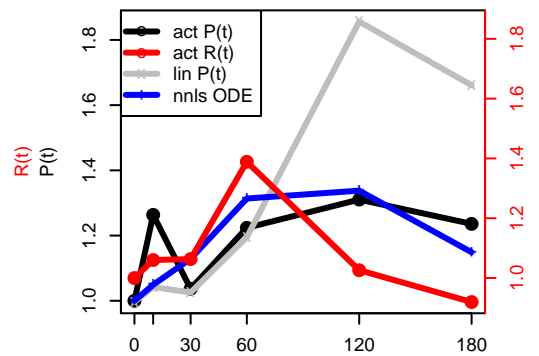

Time (min)  
ks = 0.0326833349021069 kd = 0.0280794201550398

SPAC19A8.15

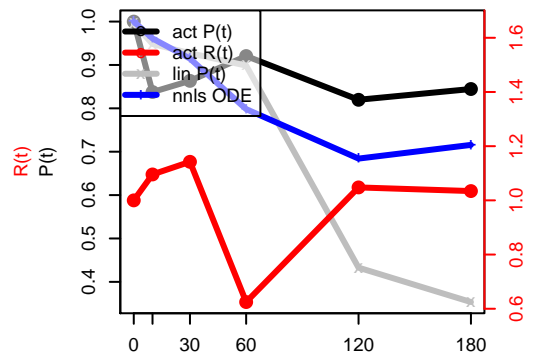

Time (min)  
ks = 0.0113796219357375 kd = 0.0161568935157891

SPAC1B2.04

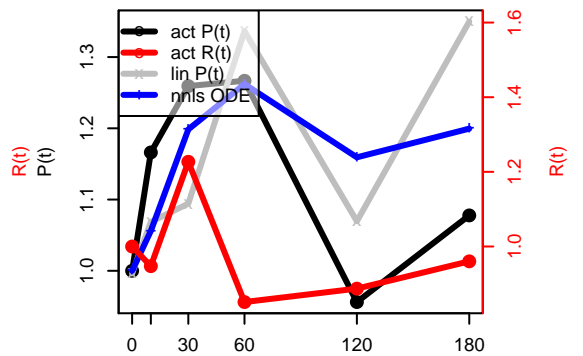

Time (min)  
ks = 0.0328085378473535 kd = 0.0255561726698546

SPAC1D4.02c

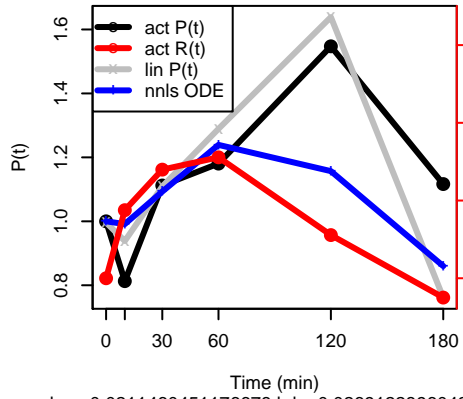

SPAC21E11.08

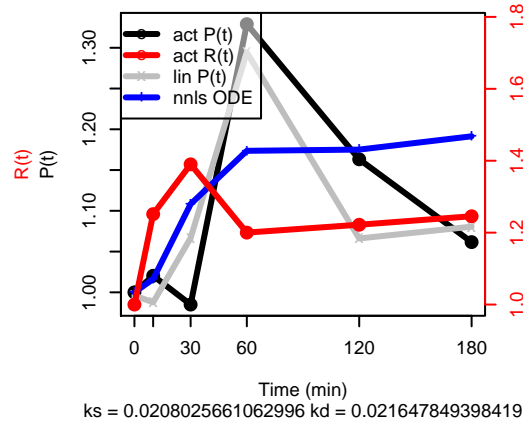

SPAC227.02c

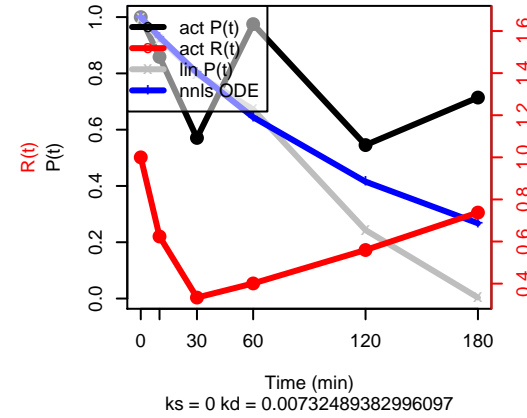

SPAC227.15

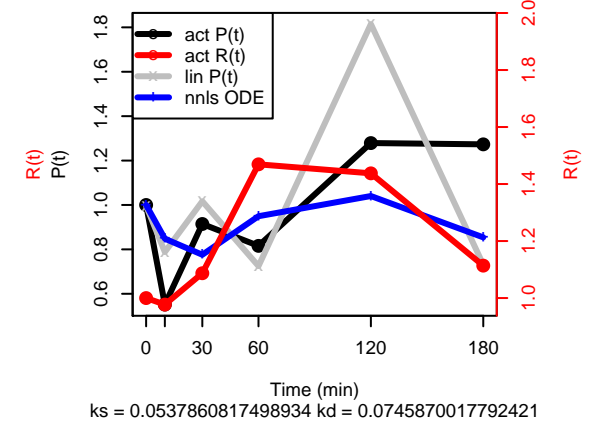

SPAC23C11.17

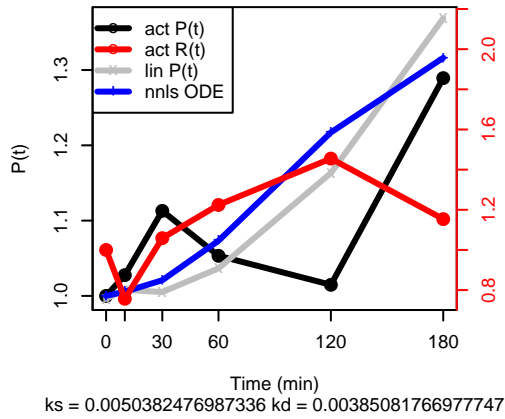

SPAC23C4.12

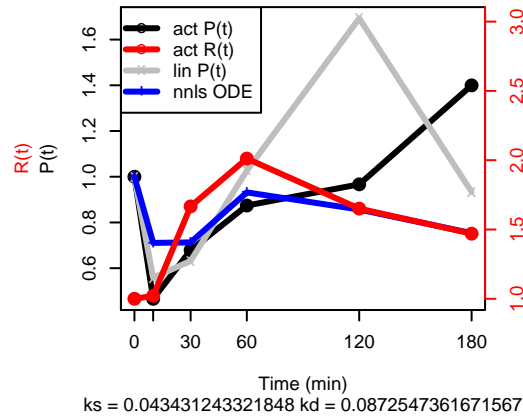

SPAC24C9.12c

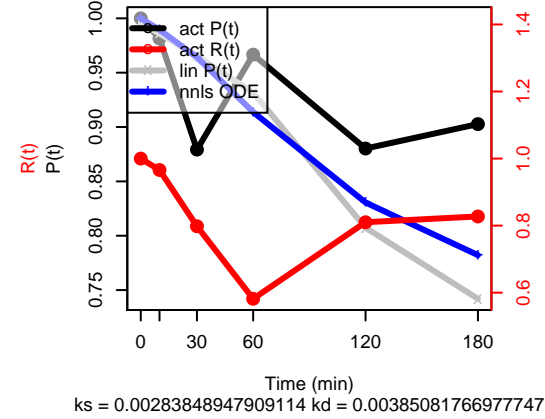

SPAC25B8.10

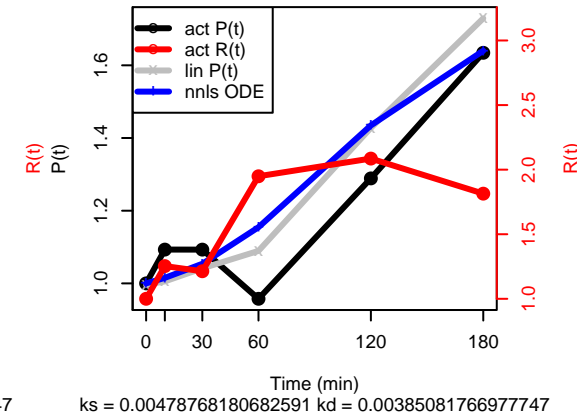

SPAC25G10.05c

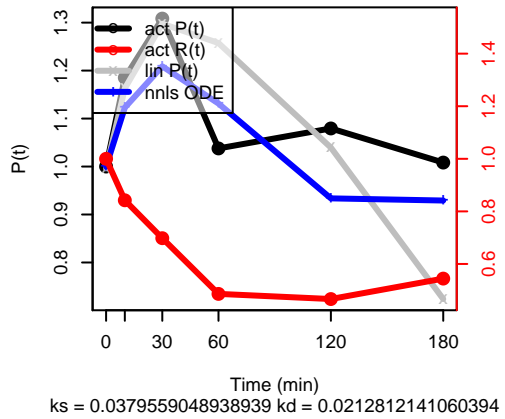

SPAC29A4.05

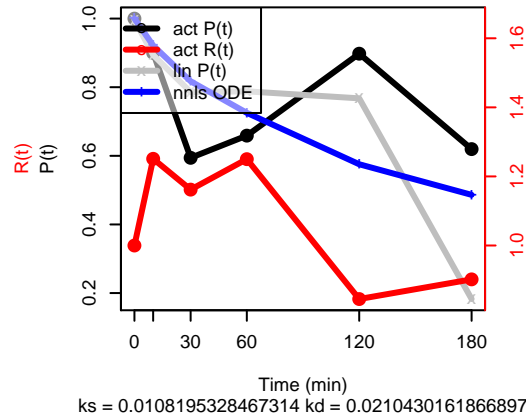

SPAC2C4.11c

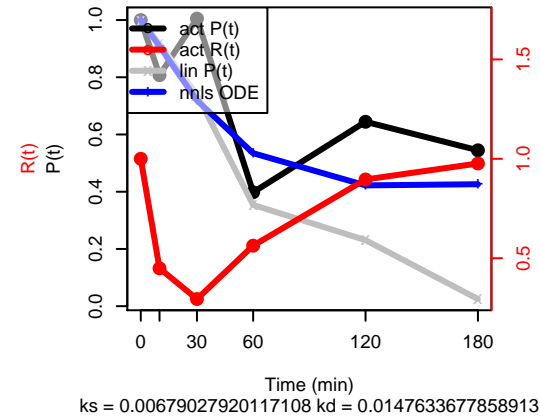

SPAC2G11.07c

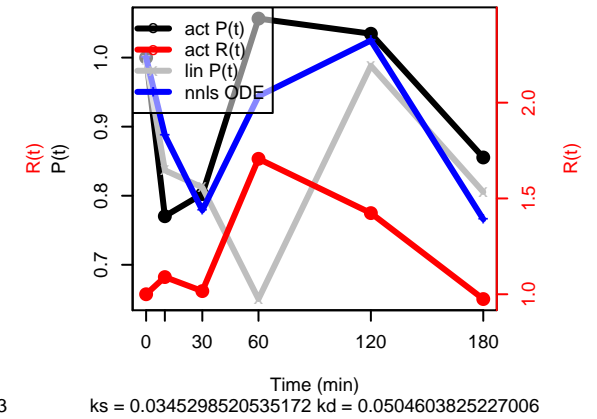

SPAC31A2.12

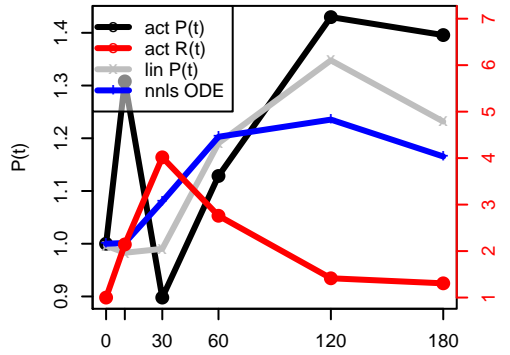

Time (min)  
ks = 0.00252337499707461 kd = 0.00385081766977747

SPAC31G5.04

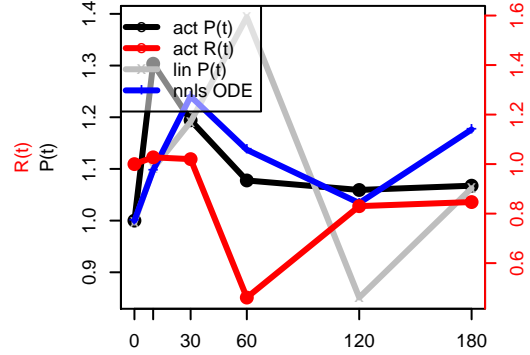

Time (min)  
ks = 0.0329291512155094 kd = 0.0224767586716904

SPAC56F8.04c

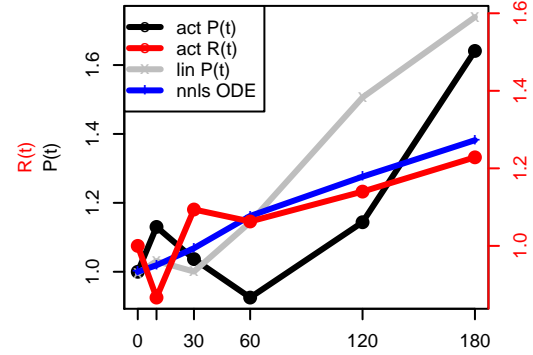

Time (min)  
ks = 0.0205888013553062 kd = 0.0171254178135182

SPAC630.13c

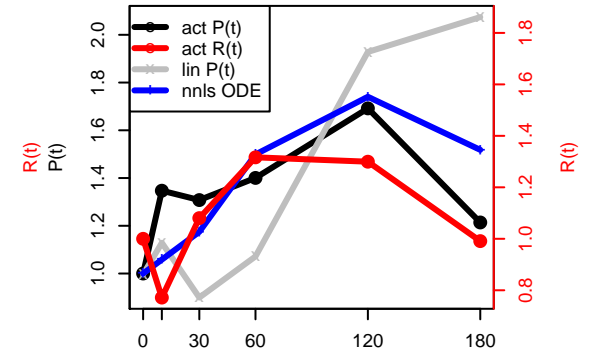

Time (min)  
ks = 0.0509534993759962 kd = 0.0377052081458731

SPAC6F6.12

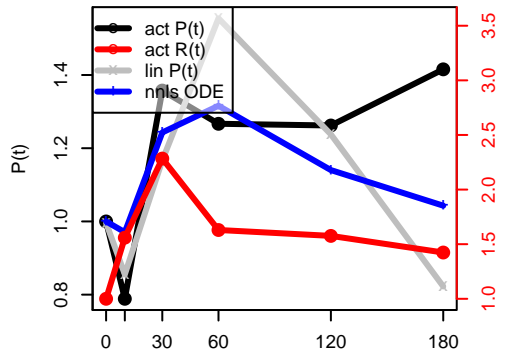

Time (min)  
ks = 0.0346141799168988 kd = 0.048705648809504

SPAC7D4.10

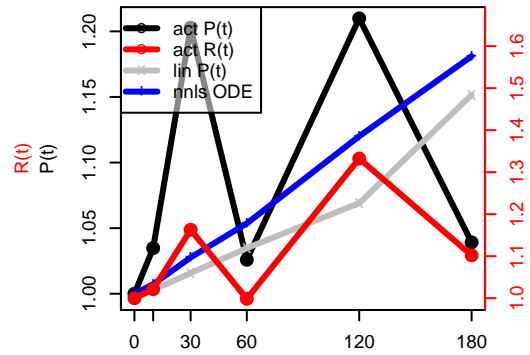

Time (min)  
ks = 0.00452873170300468 kd = 0.00385081766977747

SPAC8C9.05

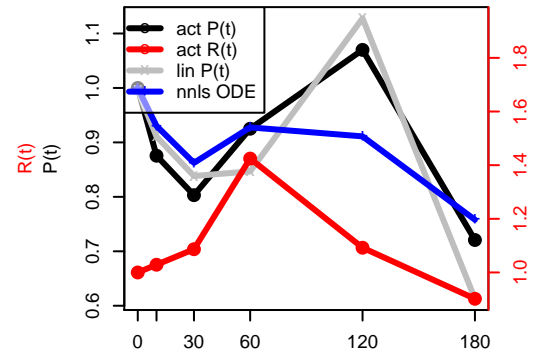

Time (min)  
ks = 0.0252152881246459 kd = 0.0337656611338234

SPAC9E9.10c

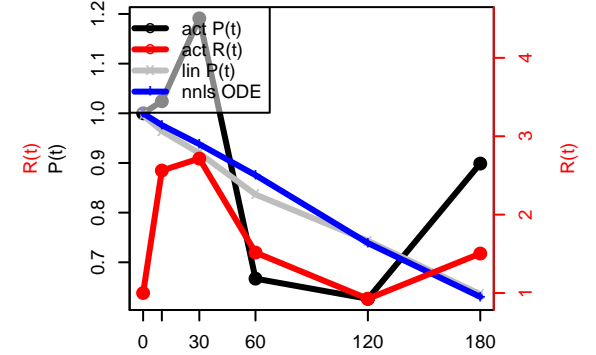

Time (min)  
ks = 0.000668901805475563 kd = 0.00385081766977747

SPACUNK4.06c

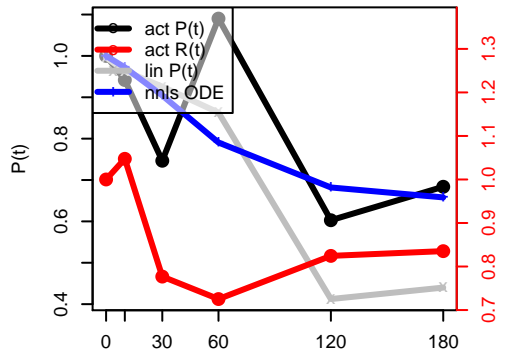

Time (min)  
ks = 0.0108974938819046 kd = 0.0141391618041099

SPAP27G11.02

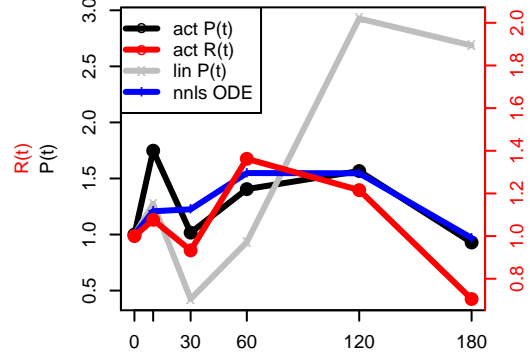

Time (min)  
ks = 0.135568495660124 kd = 0.107778597053229

SPAP27G11.09c

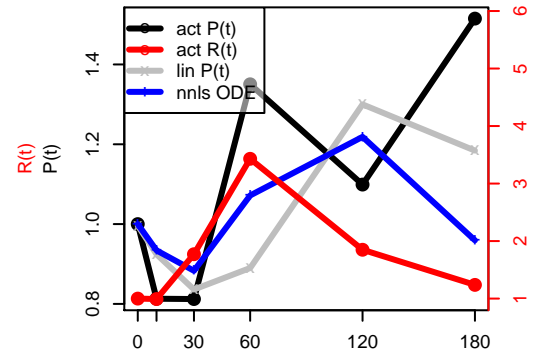

Time (min)  
ks = 0.00794614222727611 kd = 0.0151250873159191

SPAPB17E12.14c

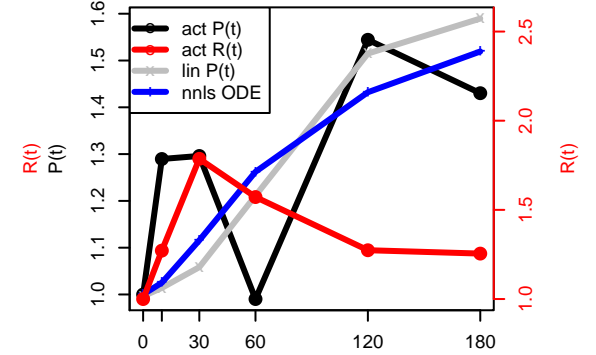

Time (min)  
ks = 0.0056460974624117 kd = 0.00385081766977747

SPBC106.03

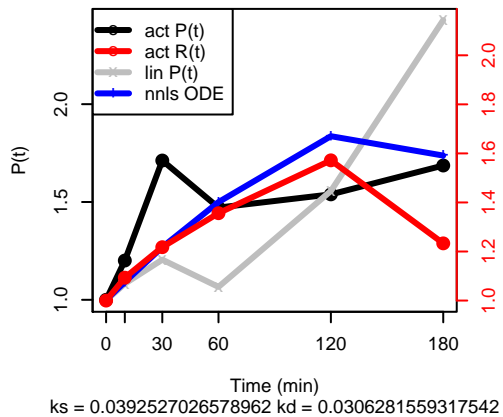

SPBC119.15

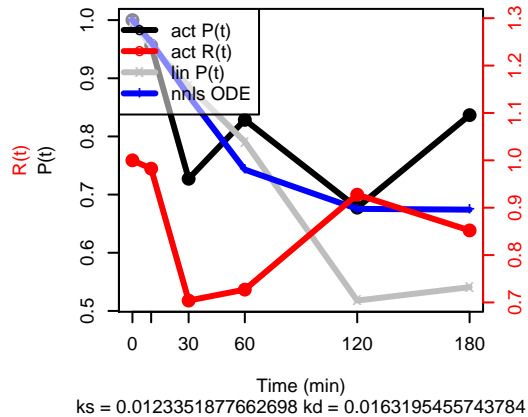

SPBC11C11.08

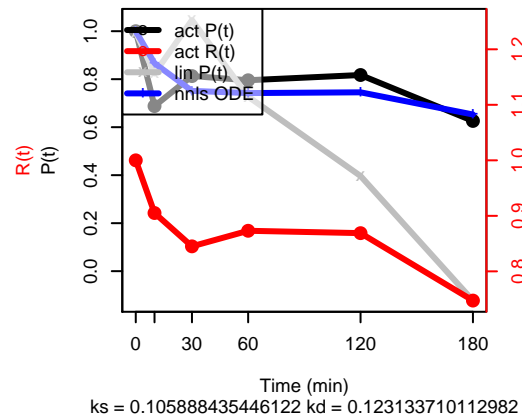

SPBC16A3.18

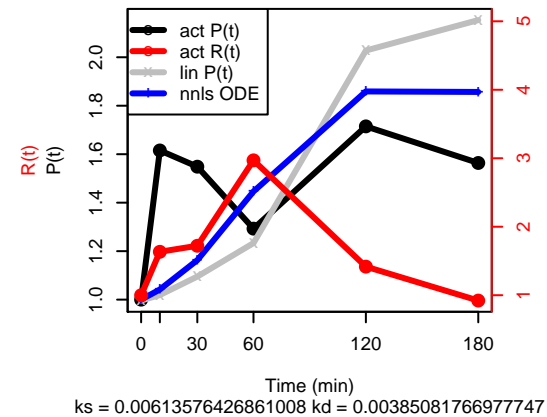

SPBC16C6.07c

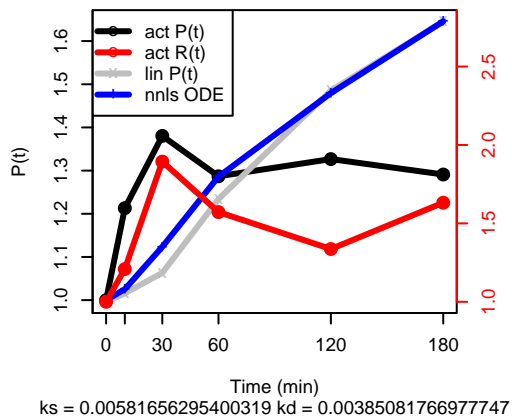

SPBC16E9.05

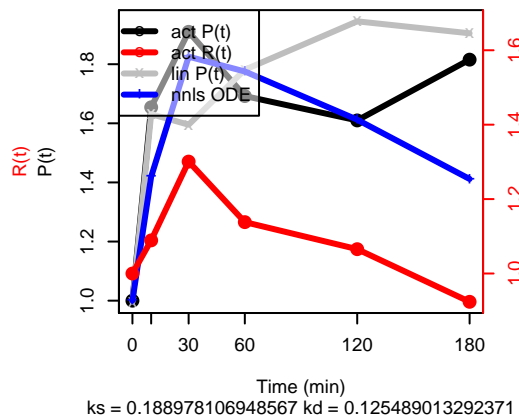

SPBC16H5.06

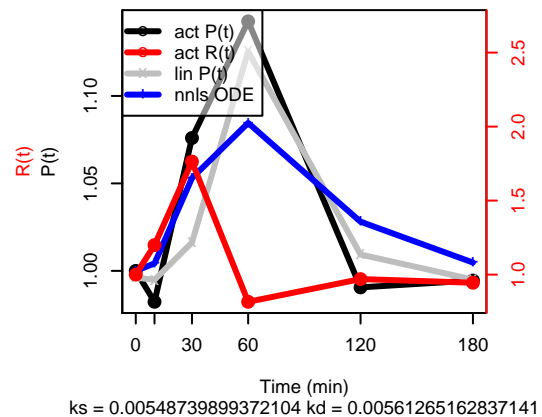

SPBC1703.03c

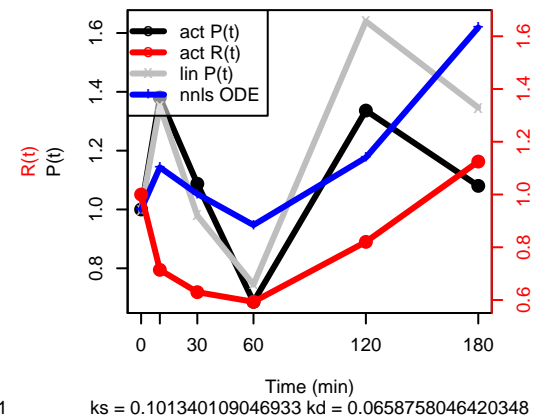

SPBC17G9.08c

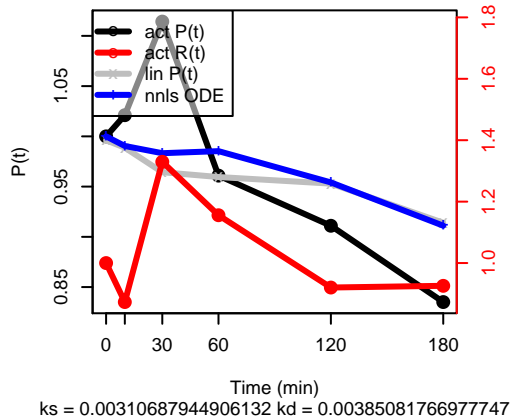

SPBC17G9.11c

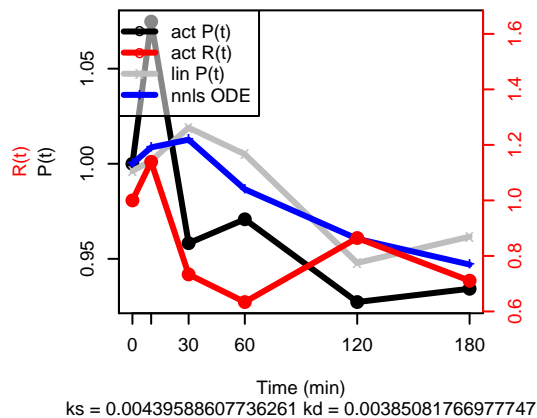

SPBC18H10.03

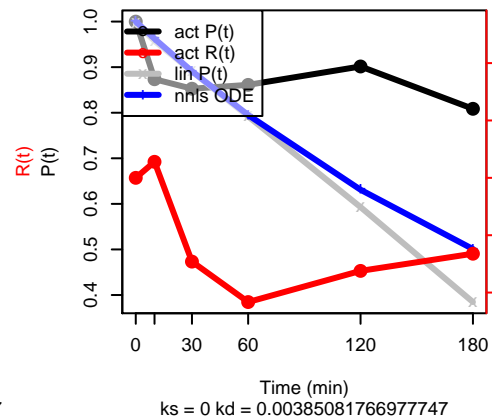

SPBC211.02c

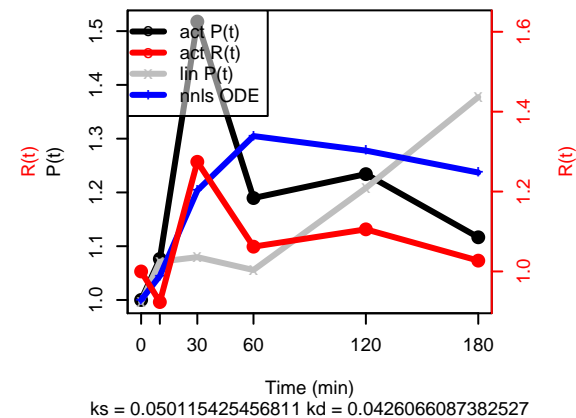



SPBC21D10.10

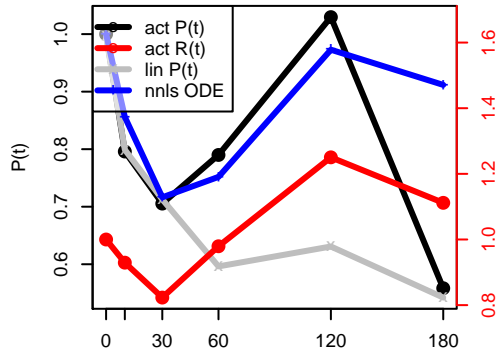

Time (min)  
ks = 0.0852142422419591 kd = 0.104922075209881

SPBC23E6.10c

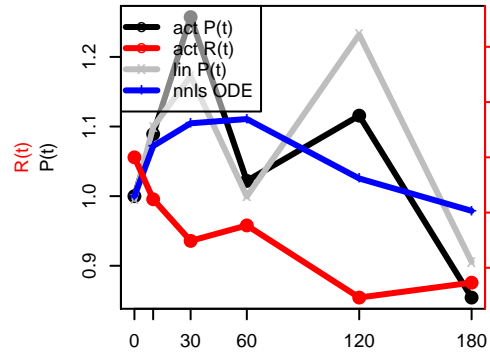

Time (min)  
ks = 0.045850277649754 kd = 0.0355428973953308

SPBC24C6.03

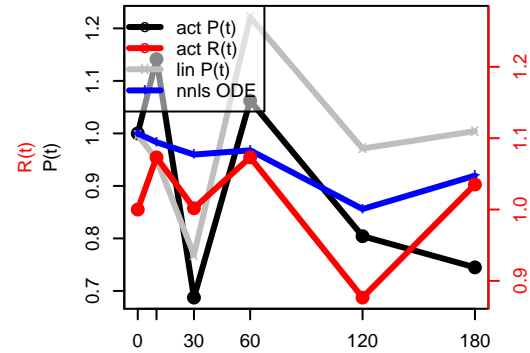

Time (min)  
ks = 0.0578949793500015 kd = 0.0624126592774813

SPBC25B2.10

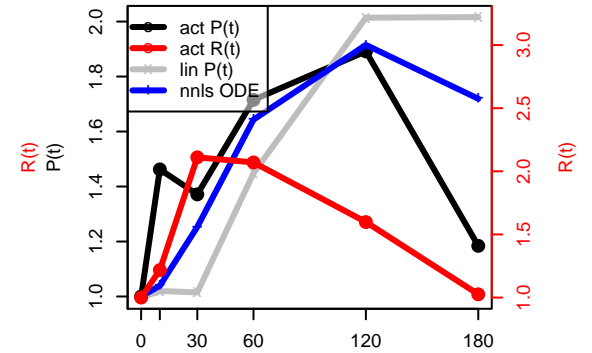

Time (min)  
ks = 0.0151414167738104 kd = 0.0127765681461754

SPBC2D10.04

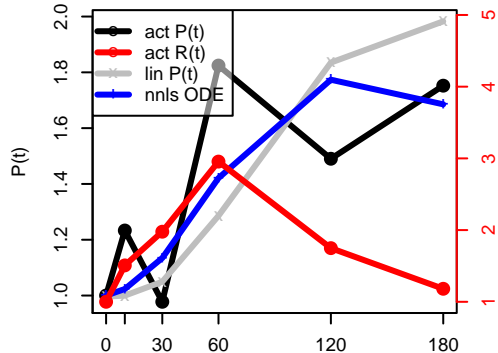

Time (min)  
ks = 0.00753091264426915 kd = 0.00718273711494267

SPBC2D10.11c

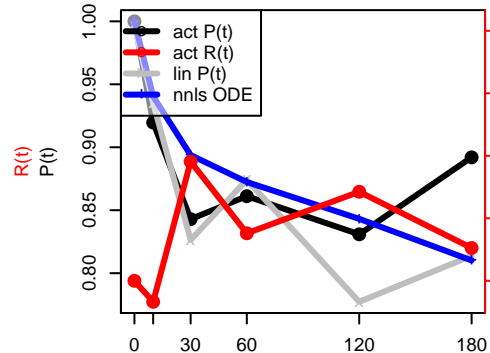

Time (min)  
ks = 0.0124947130228653 kd = 0.0185900041524938

SPBC30D10.13c

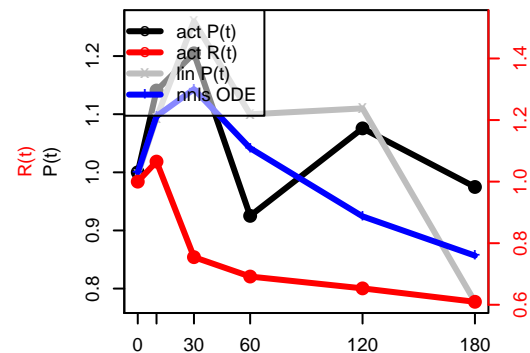

Time (min)  
ks = 0.0380505935382492 kd = 0.0282652795434101

SPBC31E1.06

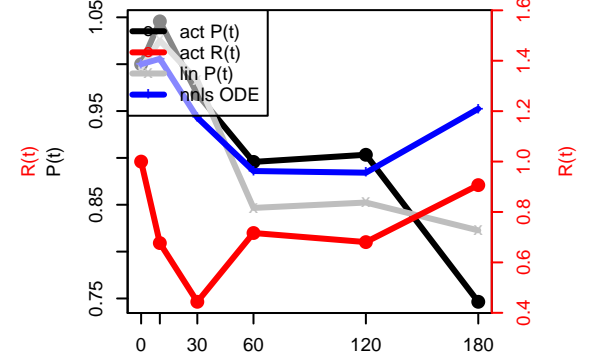

Time (min)  
ks = 0.0140152131689285 kd = 0.0111065210435502

SPBC354.04

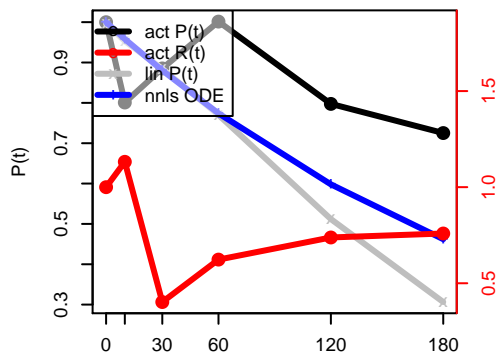

Time (min)  
ks = 0 kd = 0.00429731565465591

SPBC365.03c

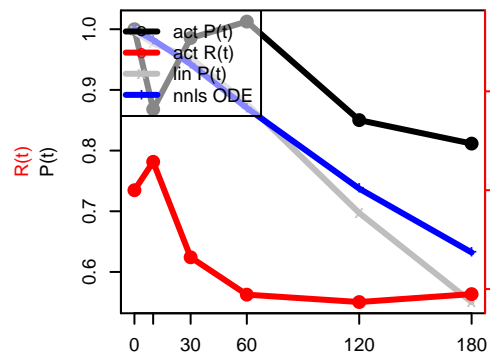

Time (min)  
ks = 0.00190406805288284 kd = 0.00385081766977747

SPBC365.10

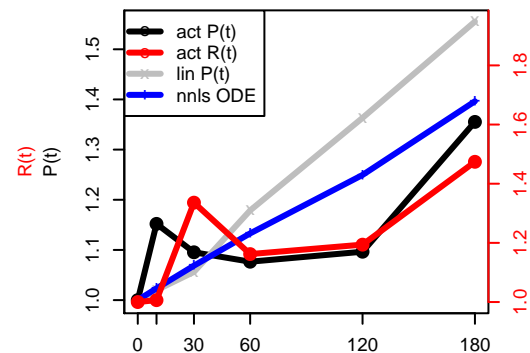

Time (min)  
ks = 0.00621477354594673 kd = 0.00385081766977747

SPBC3B8.03

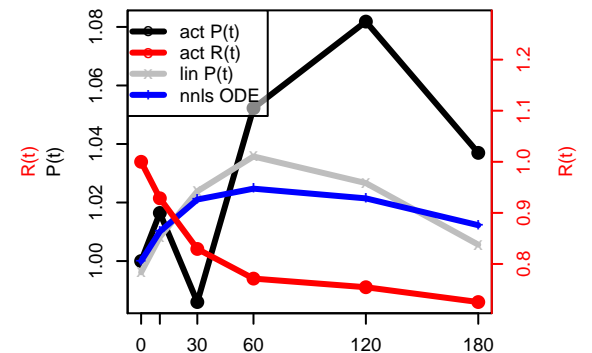

Time (min)  
ks = 0.00505629066883385 kd = 0.00385081766977747

SPBC3E7.11c

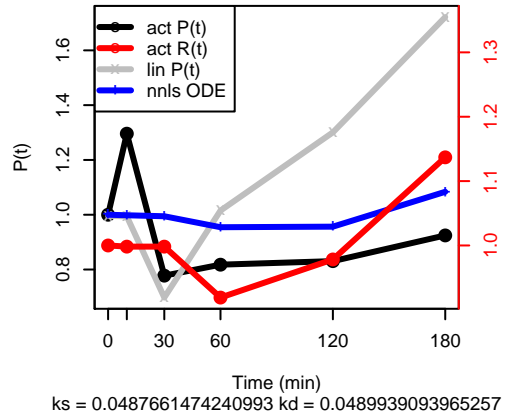

SPBC543.10

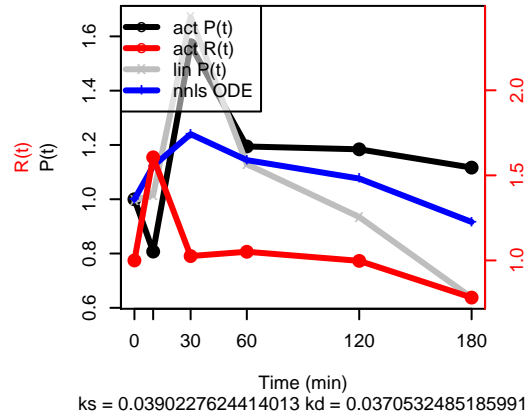

SPBC651.08c

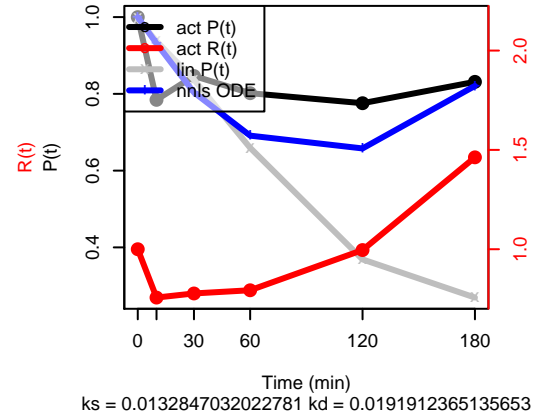

SPBC713.04c

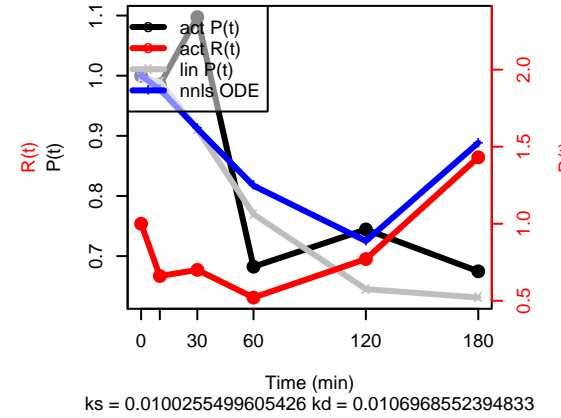

SPBC713.07c

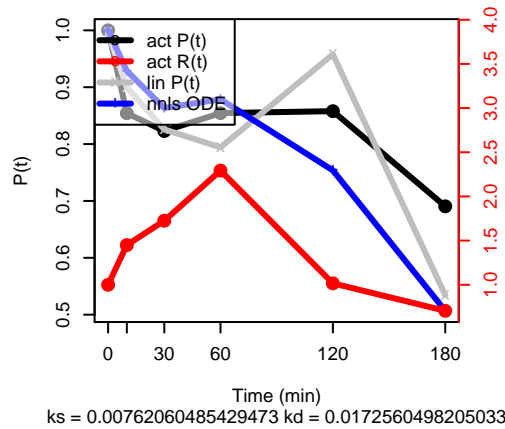

SPBC839.08c

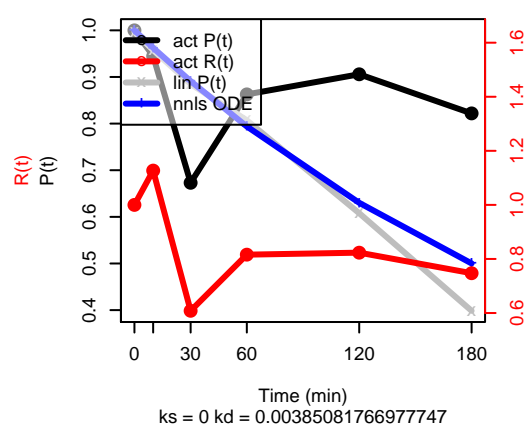

SPBC839.16

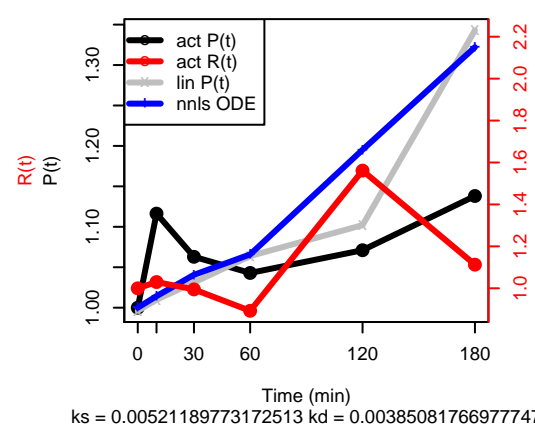

SPBP4H10.17c

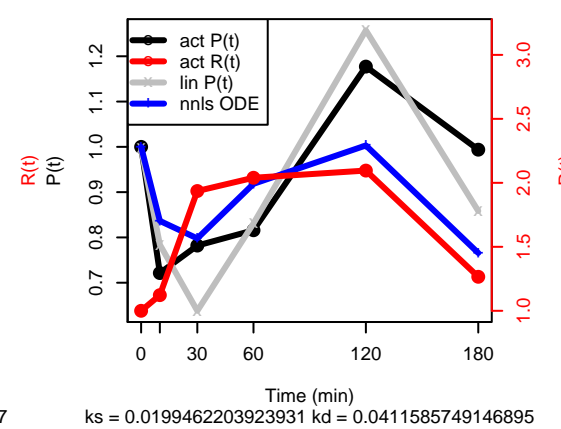

SPBPJ4664.04

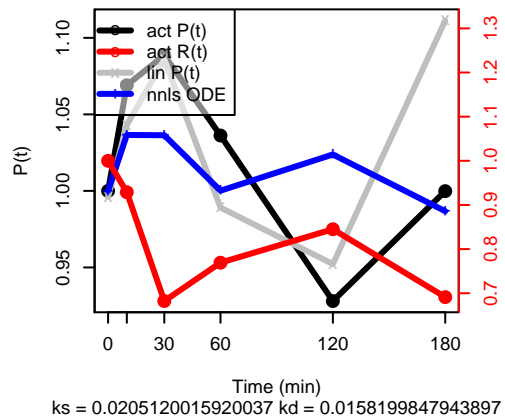

SPCC1183.07

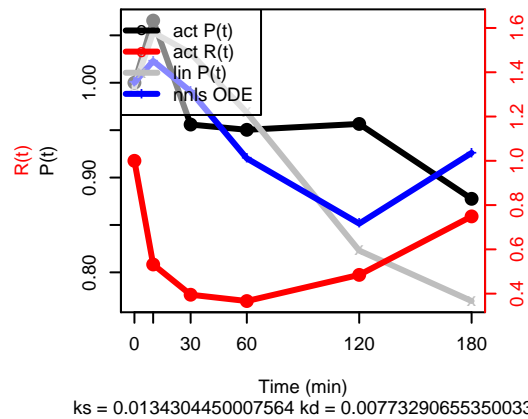

SPCC1223.06

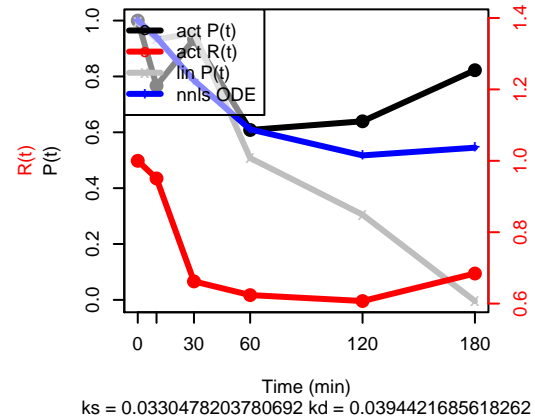

SPCC132.04c

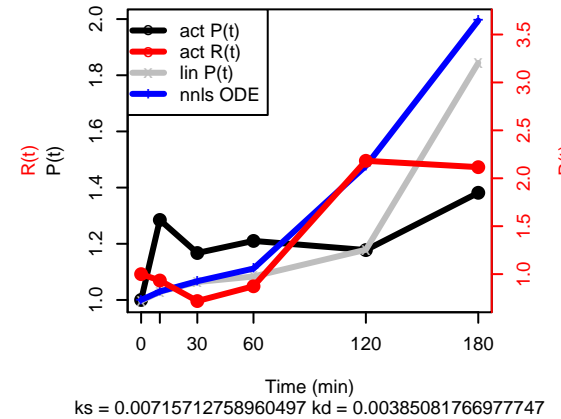

SPCC162.11c

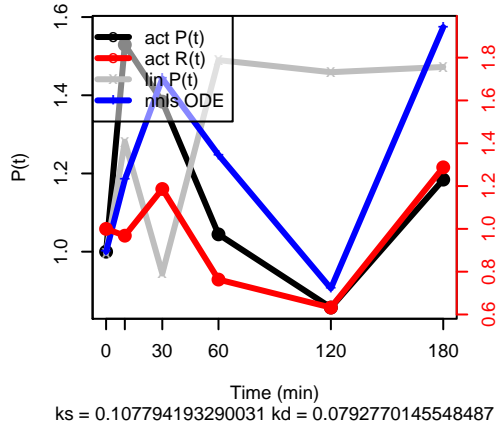

SPCC1620.11

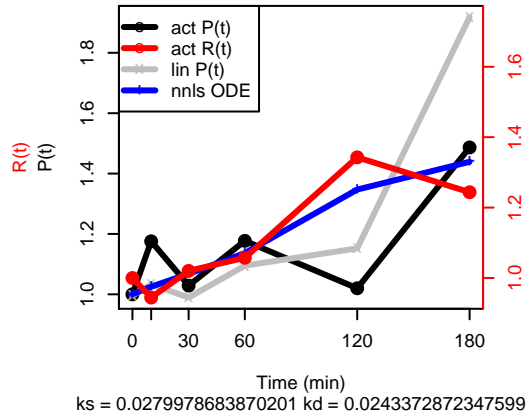

SPCC1672.11c

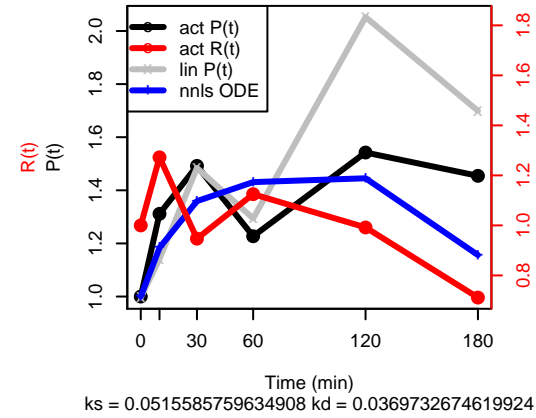

SPCC1795.02c

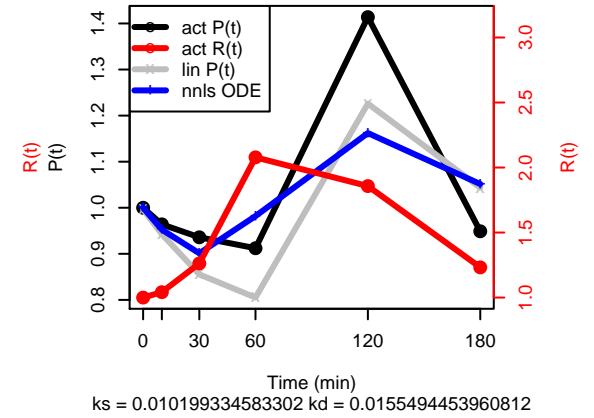

SPCC18.14c

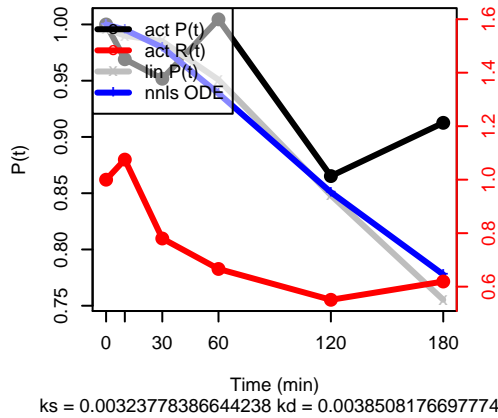

SPCC1827.02c

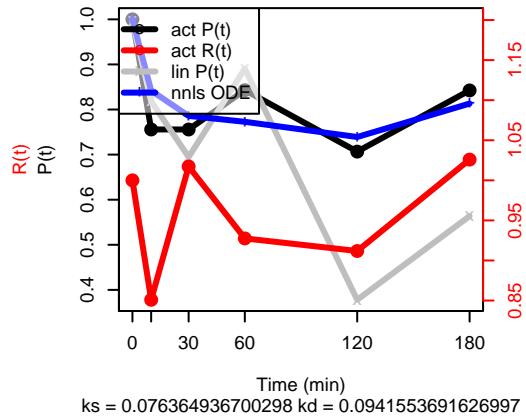

SPCC1827.06c

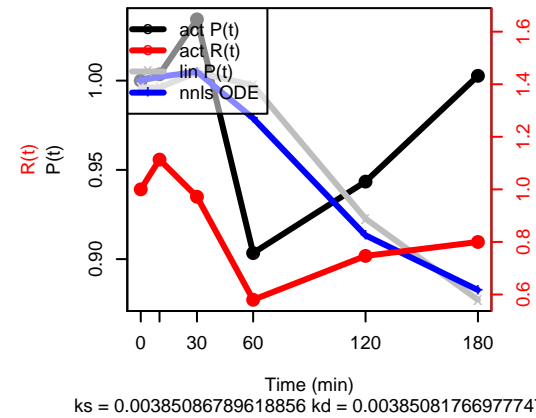

SPCC550.06c

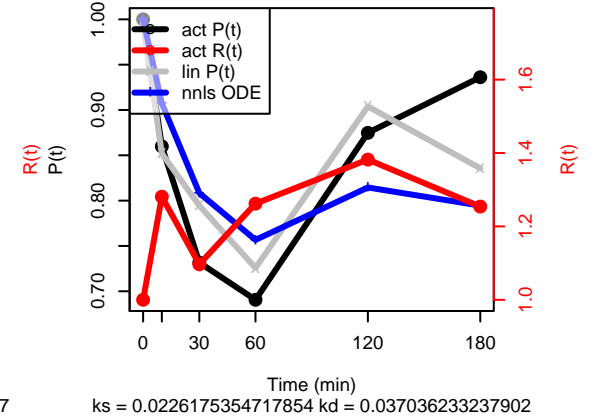

SPCC550.14

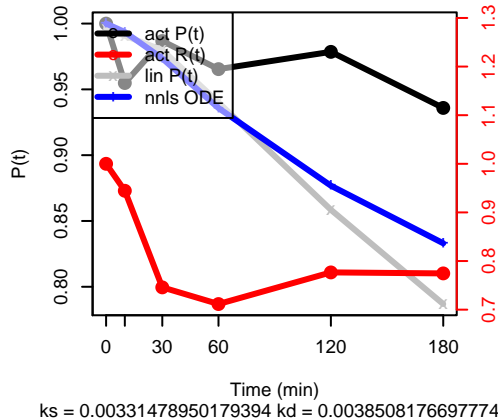

SPCC569.07

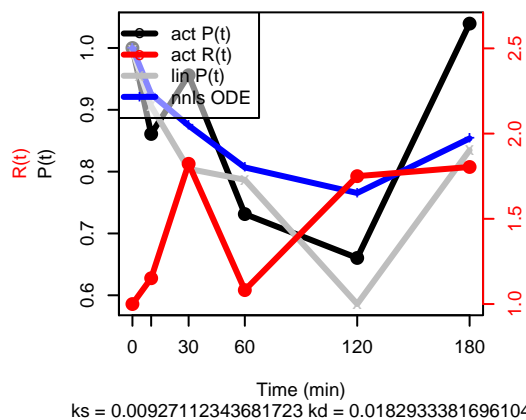

SPCC5E4.03c

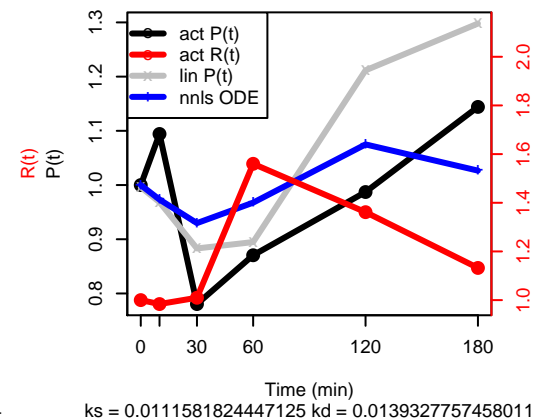

SPCC737.07c

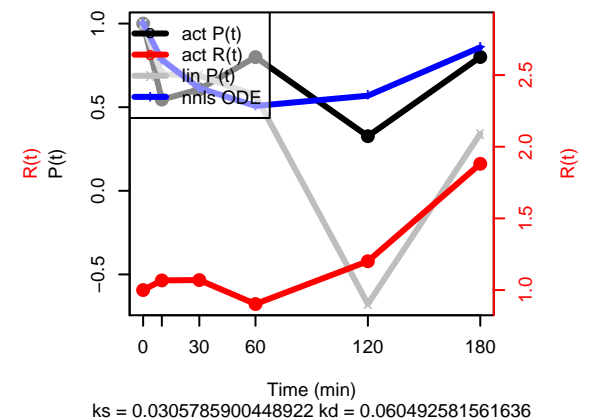

SPCC970.06

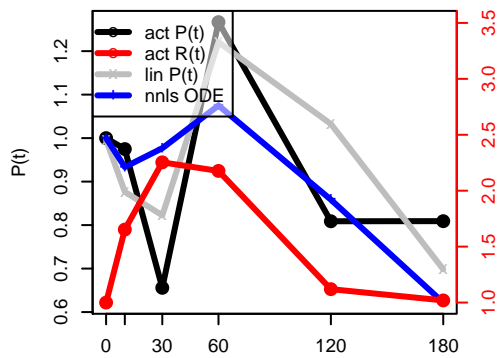

Time (min)  
ks = 0.0132163426413251 kd = 0.0251843389078079

SPAC1071.08

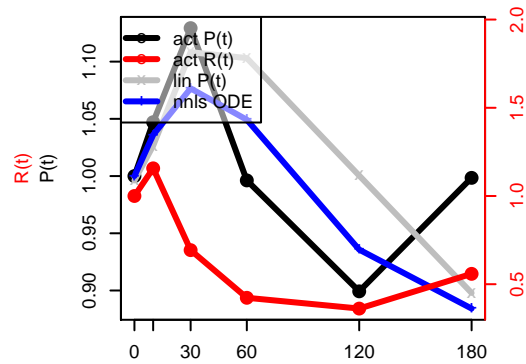

Time (min)  
ks = 0.00826341358810629 kd = 0.00522574646357653

SPAC1093.02

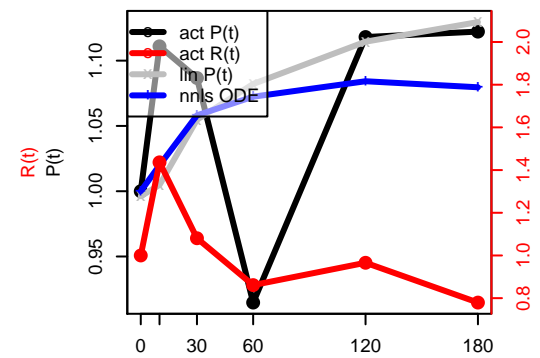

Time (min)  
ks = 0.00471683913201601 kd = 0.00385081766977747

SPAC11H11.06

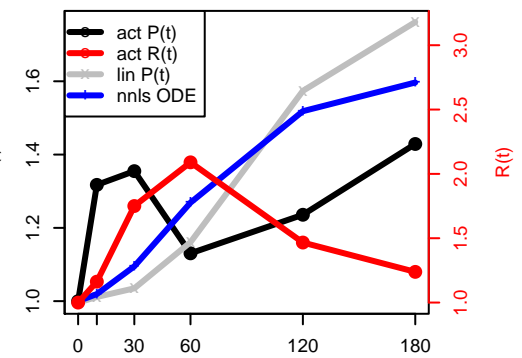

Time (min)  
ks = 0.00537715573070853 kd = 0.00385081766977747

SPAC12B10.16c

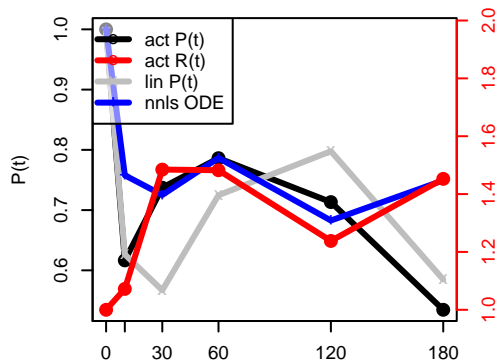

Time (min)  
ks = 0.0434934396494702 kd = 0.0804638293390566

SPAC1486.09

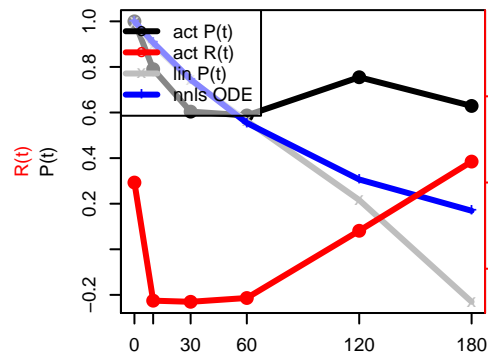

Time (min)  
ks = 0 kd = 0.00985514300658395

SPAC14C4.11

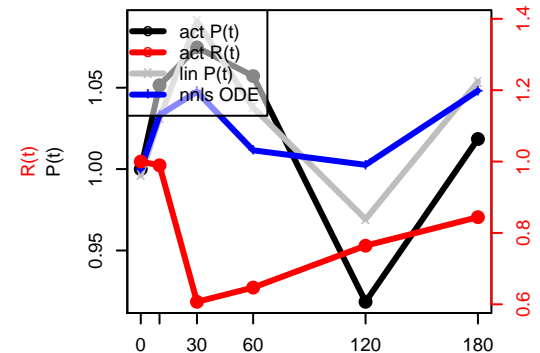

Time (min)  
ks = 0.011869433955591 kd = 0.0083461576619939

SPAC1565.08

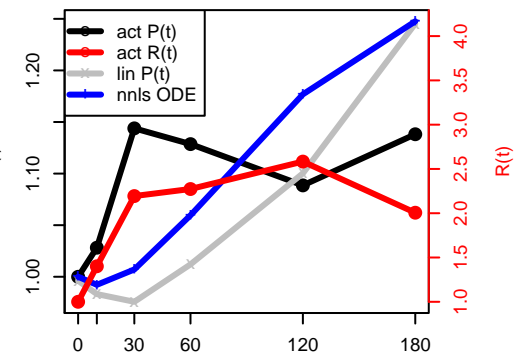

Time (min)  
ks = 0.00255847278924028 kd = 0.00385081766977747

SPAC15A10.11

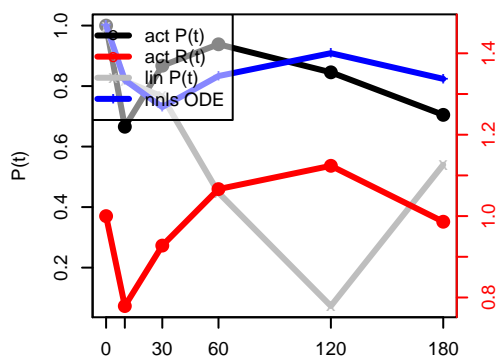

Time (min)  
ks = 0.082486778978856 kd = 0.100407396999743

SPAC15F9.02

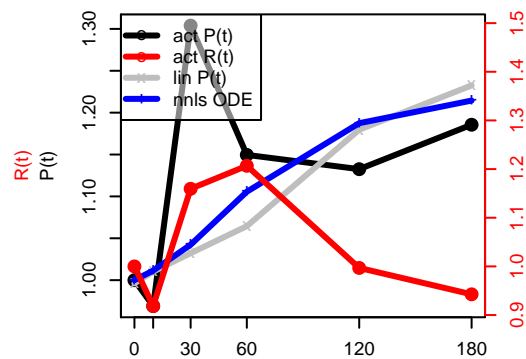

Time (min)  
ks = 0.00525892009567136 kd = 0.00385081766977747

SPAC17G6.08

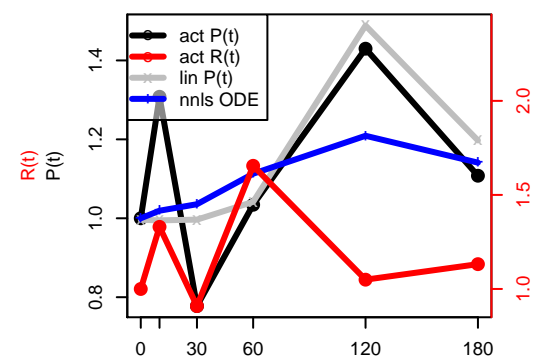

Time (min)  
ks = 0.0122315487236679 kd = 0.0123716844046671

SPAC17G6.15c

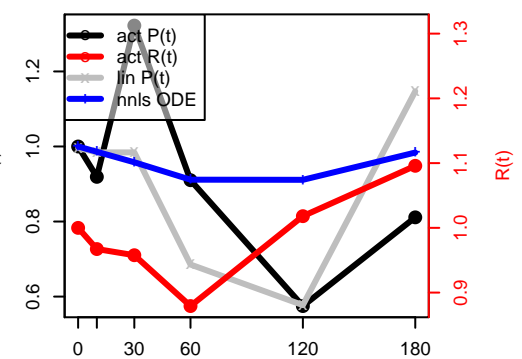

Time (min)  
ks = 0.0229788621767735 kd = 0.0241785348507842

SPAC1805.16c

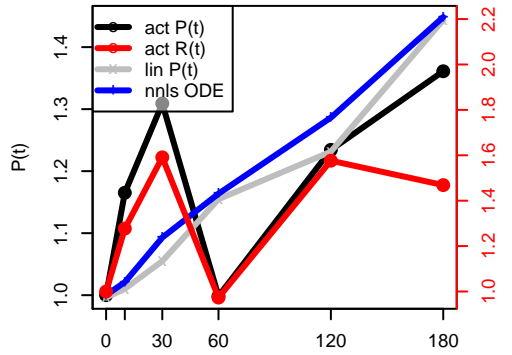

Time (min)  
ks = 0.00526184085668395 kd = 0.00385081766977747

SPAC1851.03

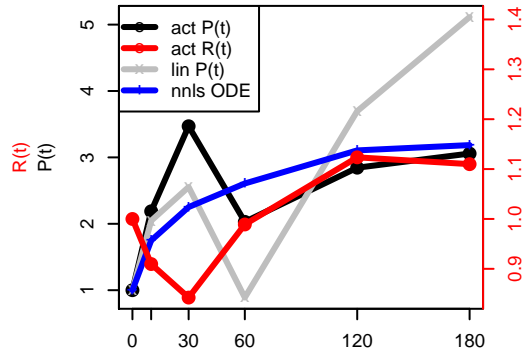

Time (min)  
ks = 0.159701176405567 kd = 0.0547653970314328

SPAC1A6.04c

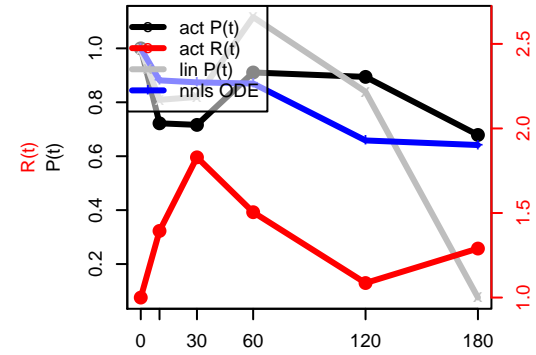

Time (min)  
ks = 0.0209026963733539 kd = 0.0396126030013224

SPAC1F12.07

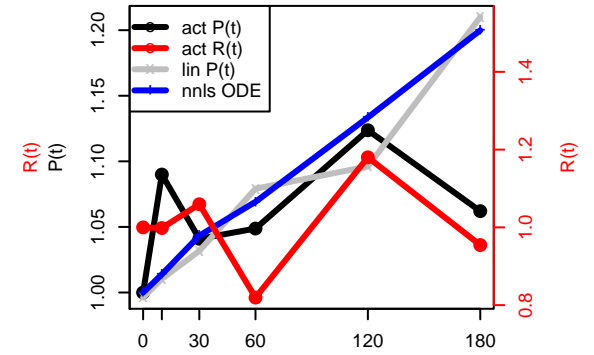

Time (min)  
ks = 0.0052741450037019 kd = 0.00385081766977747

SPAC1F5.03c

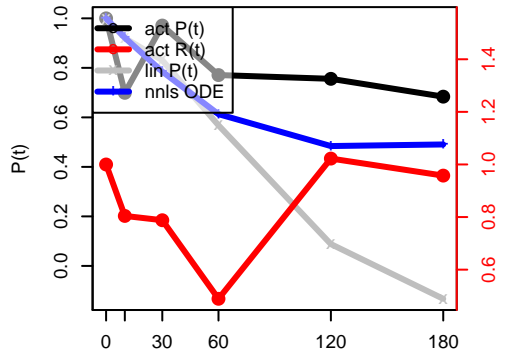

Time (min)  
ks = 0.00766042371924788 kd = 0.015235208489135

SPAC22F3.07c

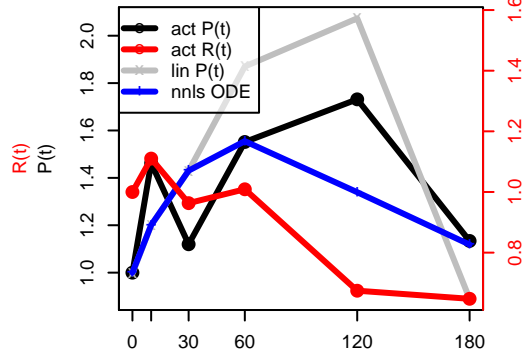

Time (min)  
ks = 0.0520595001980585 kd = 0.0316716943900361

SPAC22G7.04

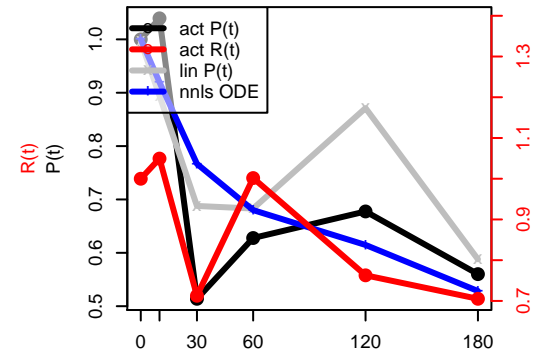

Time (min)  
ks = 0.0254867716306792 kd = 0.0356678159213635

SPAC23H4.06

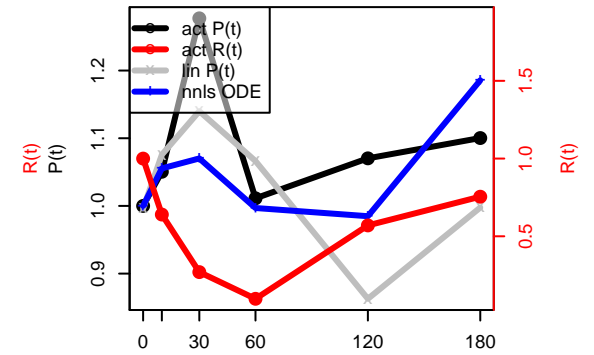

Time (min)  
ks = 0.0125150254430568 kd = 0.00456591545151049

SPAC23H4.12

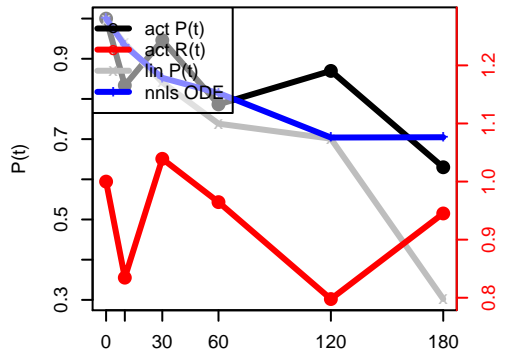

Time (min)  
ks = 0.0221782068107552 kd = 0.027990721596879

SPAC25B8.09

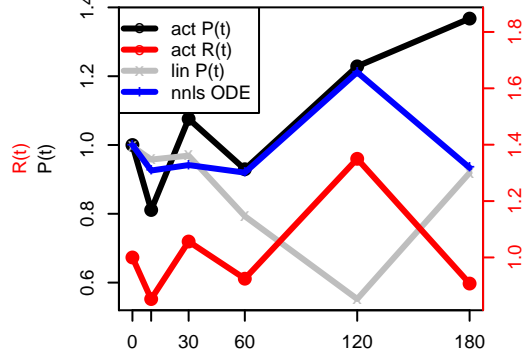

Time (min)  
ks = 0.0893855508962563 kd = 0.0932352589075845

SPAC26A3.08

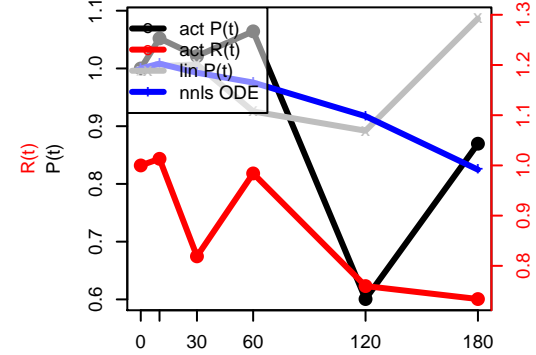

Time (min)  
ks = 0.0173757831329413 kd = 0.0165894273927609

SPAC26F1.06

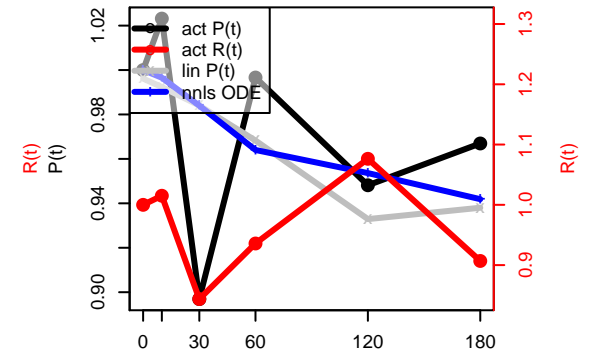

Time (min)  
ks = 0.0034711928553073 kd = 0.00385081766977747

SPAC29A4.10

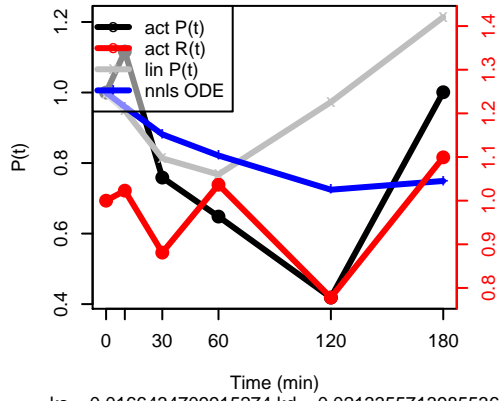

SPAC2E1P5.03

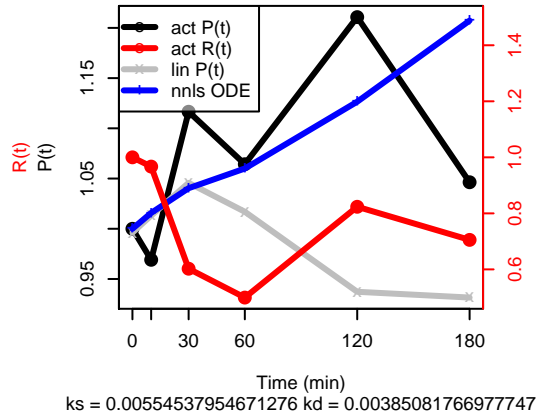

SPAC2G11.14

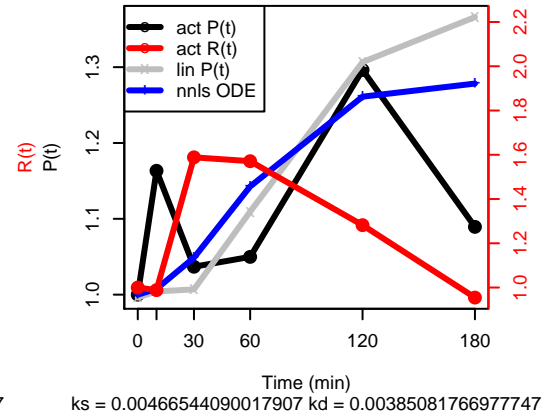

SPAC323.02c

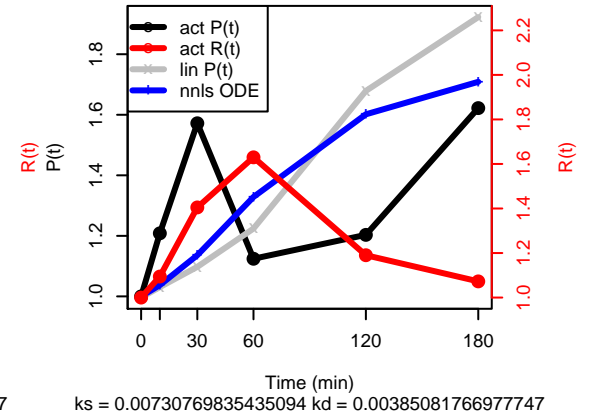

SPAC3H1.07

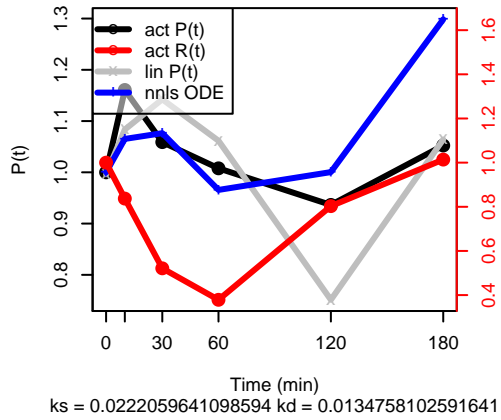

SPAC4D7.09

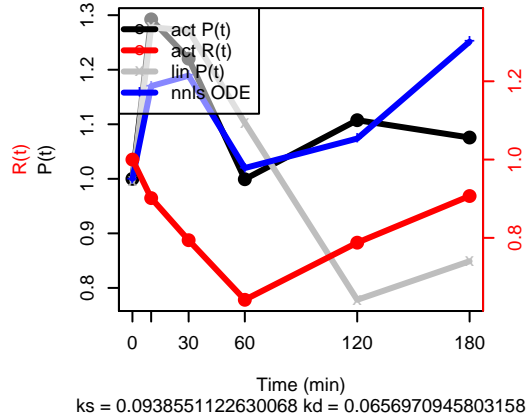

SPAC4F10.06

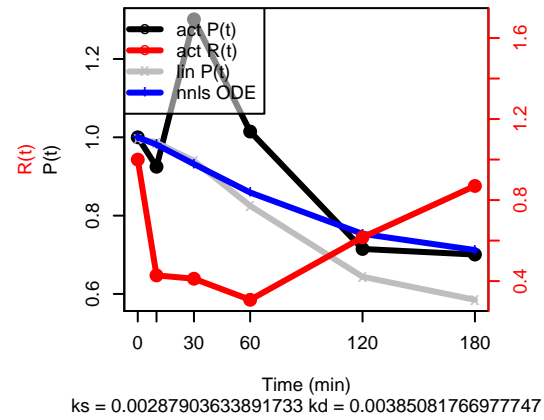

SPAC688.04c

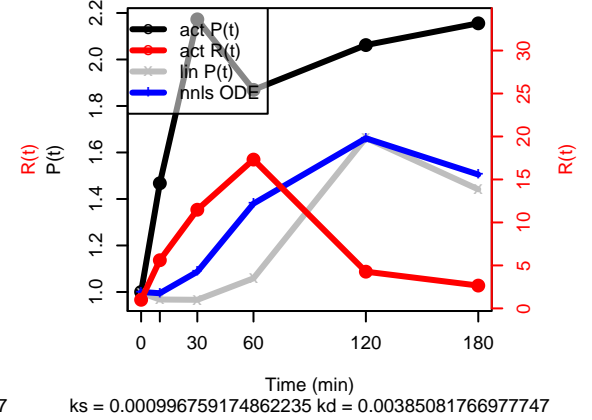

SPAC6B12.02c

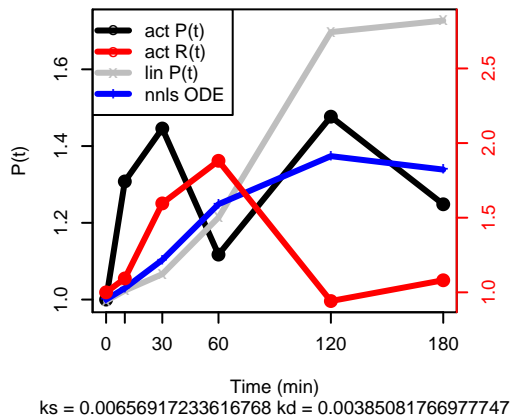

SPAC6G9.02c

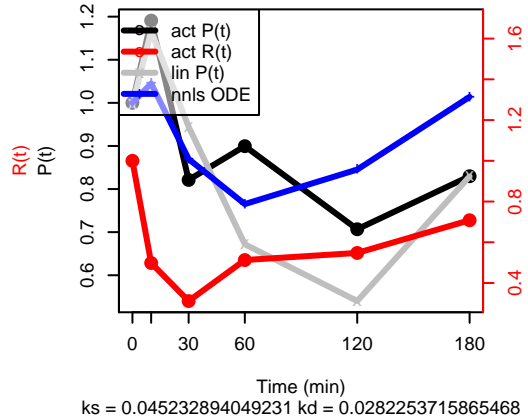

SPAC821.03c

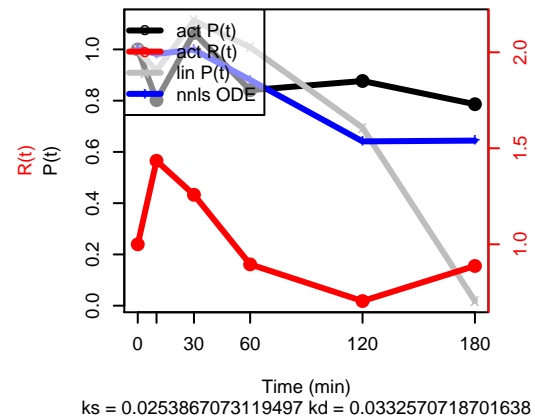

SPAC926.04c

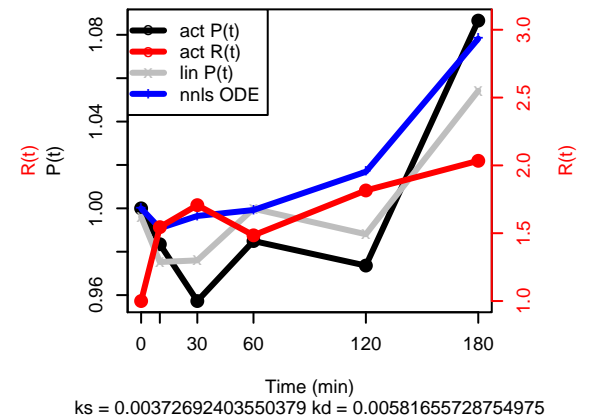

SPAC959.03c

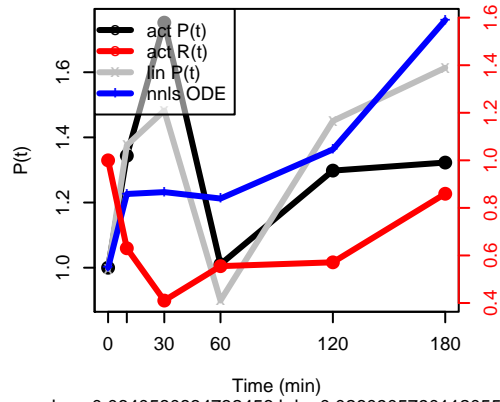

SPAC9E9.03

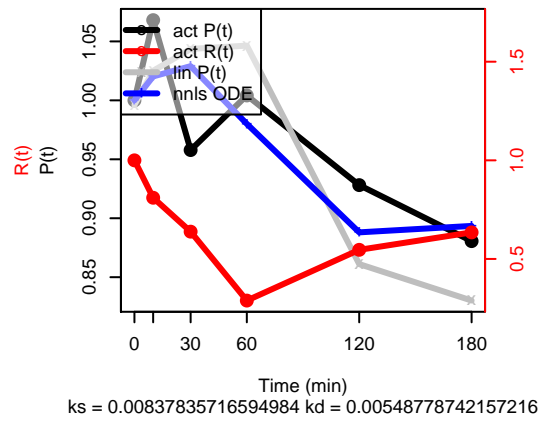

SPAC9E9.06c

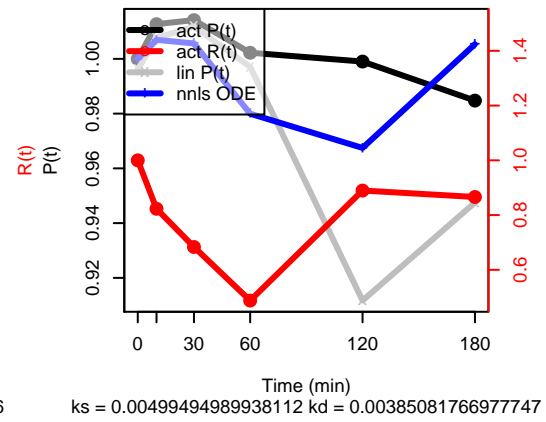

SPAC9G1.02

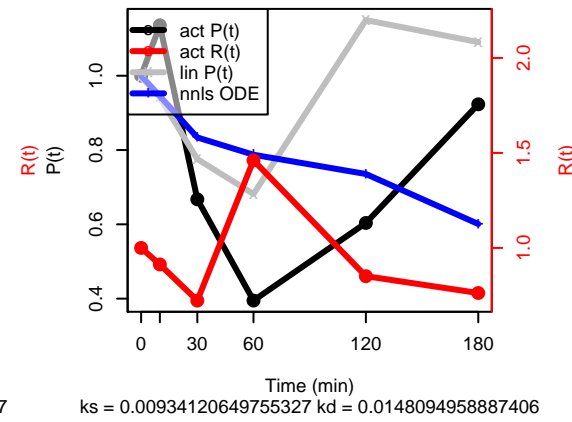

SPAC9G1.12

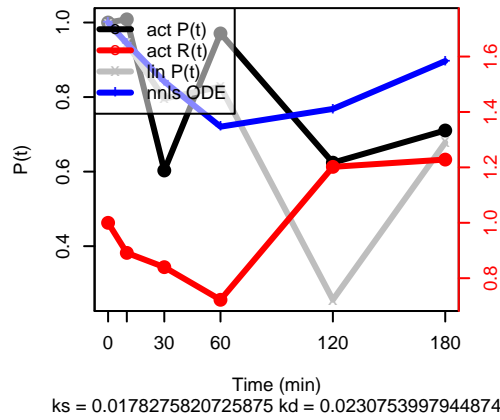

SPBC12D12.07c

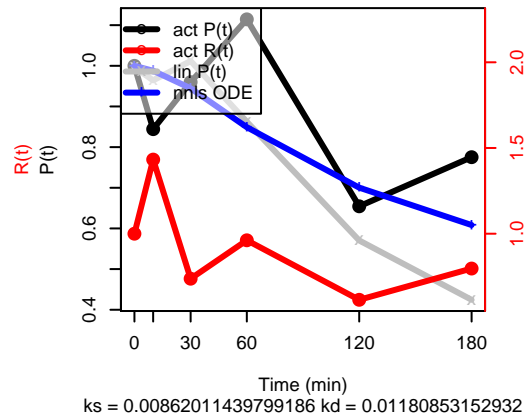

SPBC13G1.10c

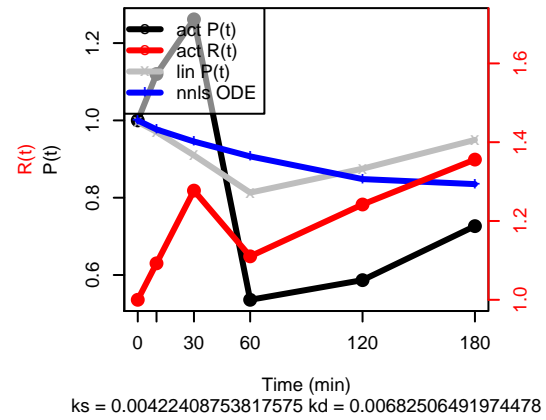

SPBC1539.04

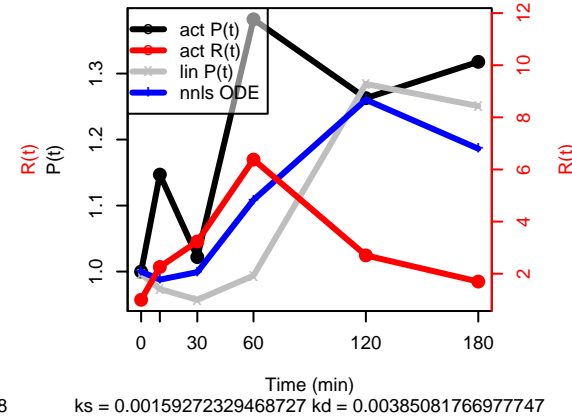

SPBC15D4.15

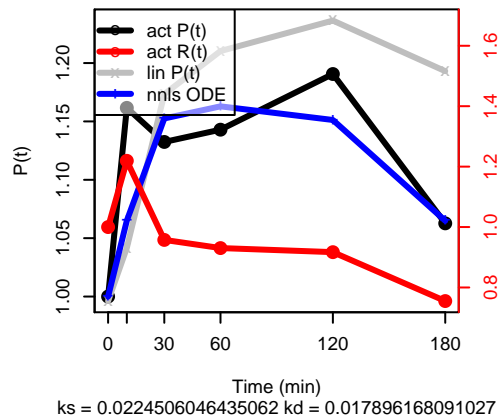

SPBC16D10.10

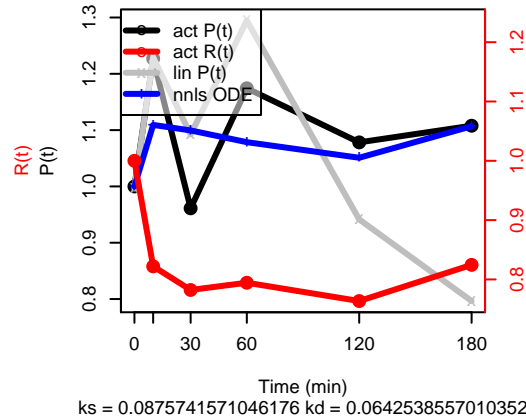

SPBC16G5.05c

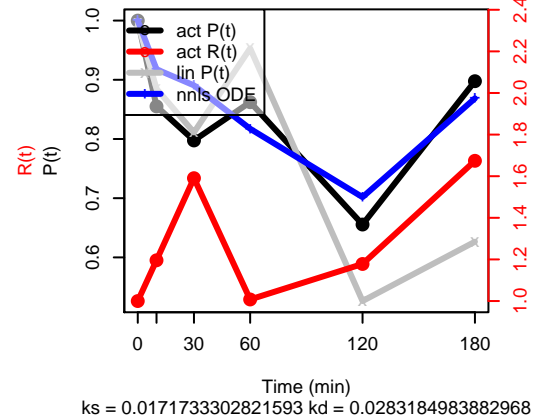

SPBC17D11.04c

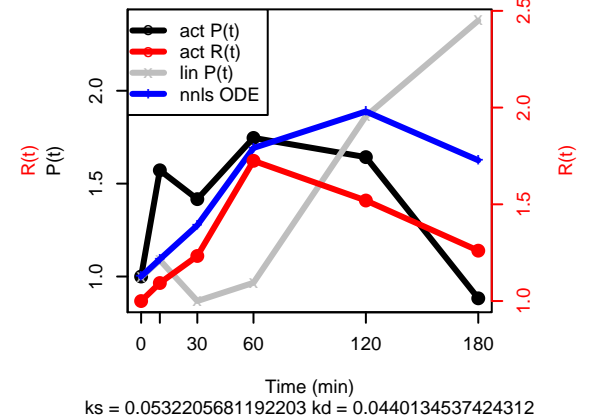



SPBC17G9.03c

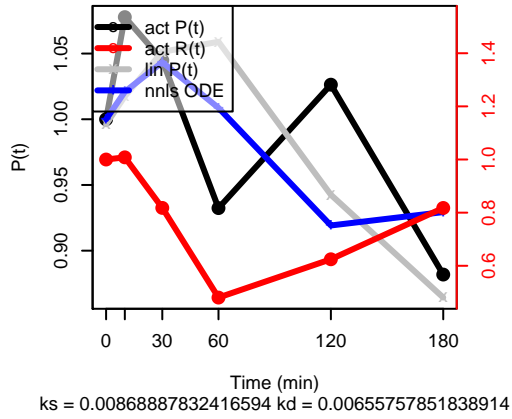

SPBC19G7.05c

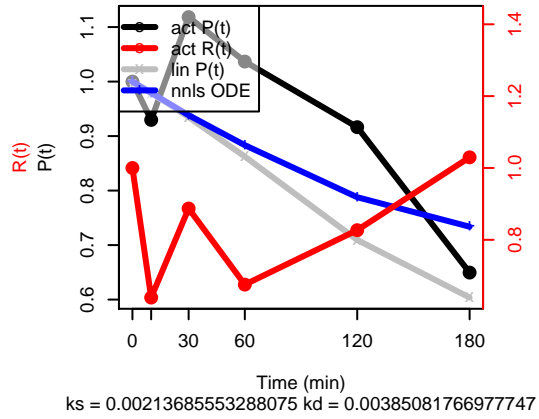

SPBC19G7.17

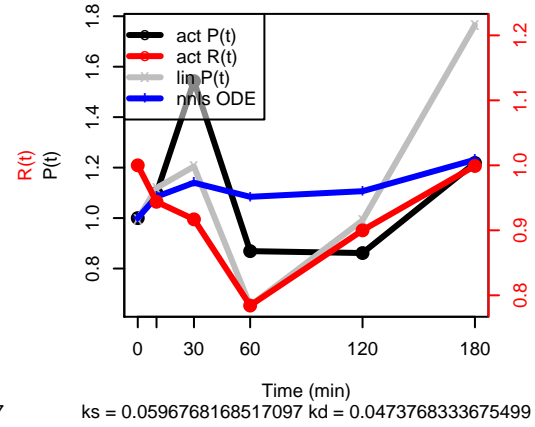

SPBC1E8.02

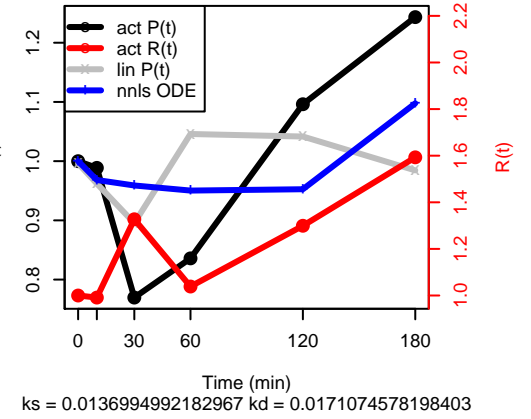

SPBC23G7.12c

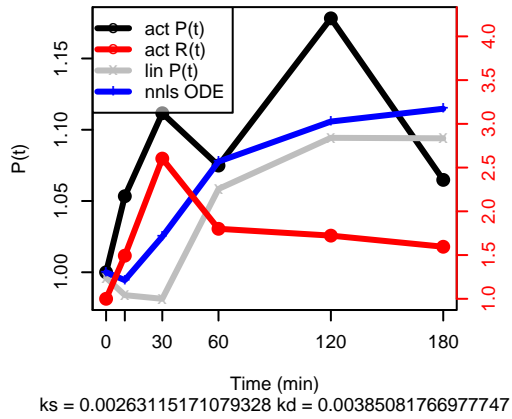

SPBC28E12.05

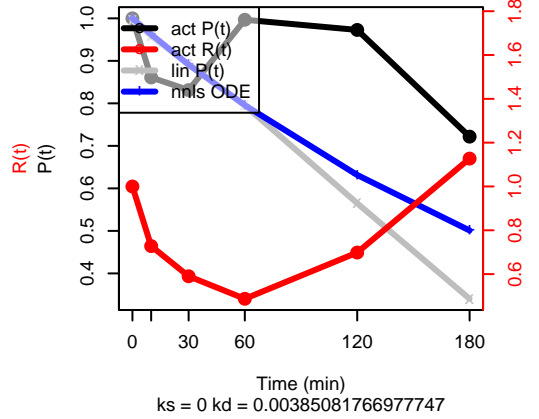

SPBC29A3.18

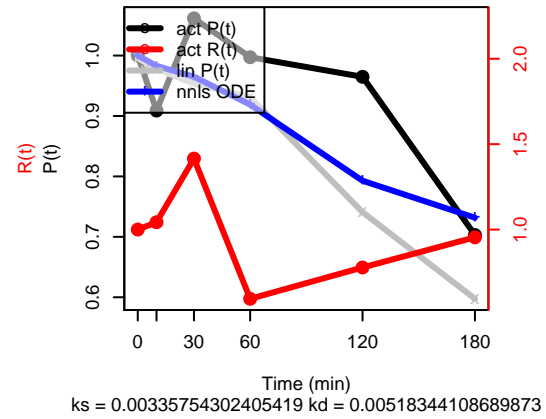

SPBC31F10.13c

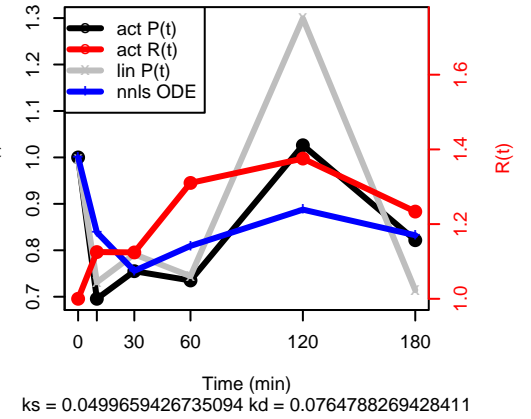

SPBC354.14c

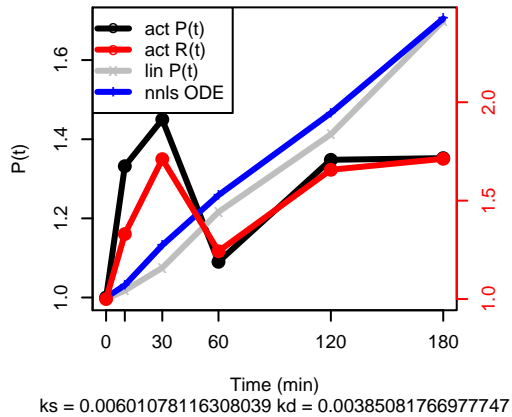

SPBC3E7.14

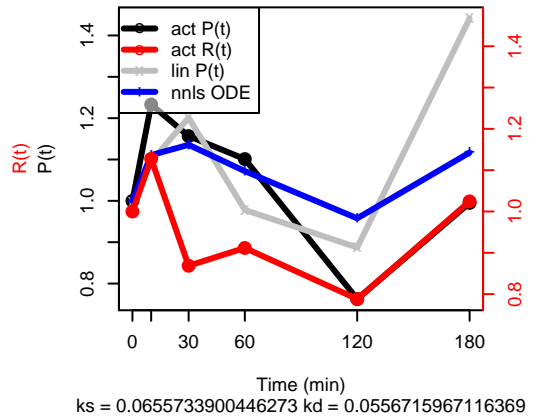

SPBC3H7.07c

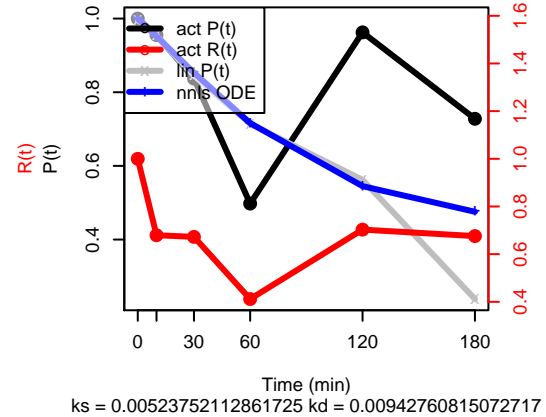

SPBC4F6.10

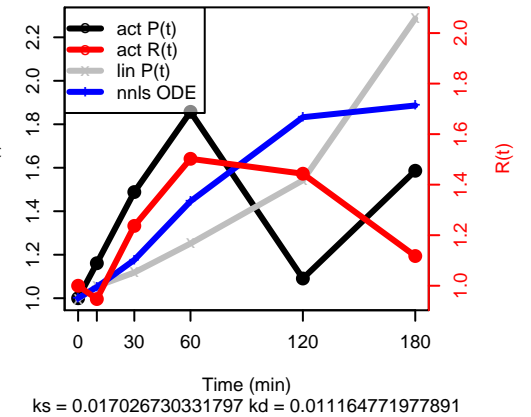

SPBC660.12c

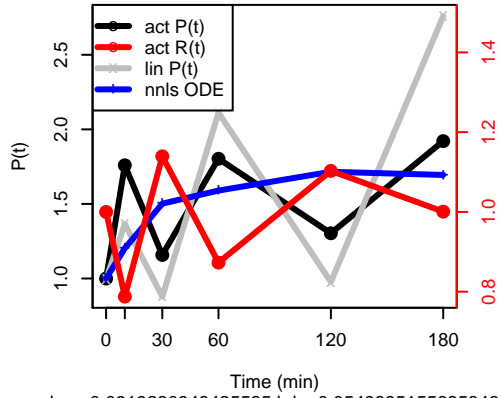

SPBC725.05c

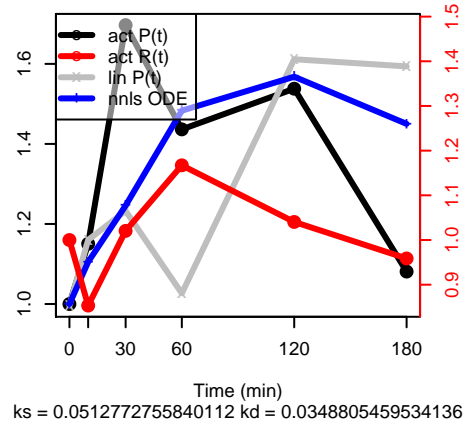

SPBC776.02c

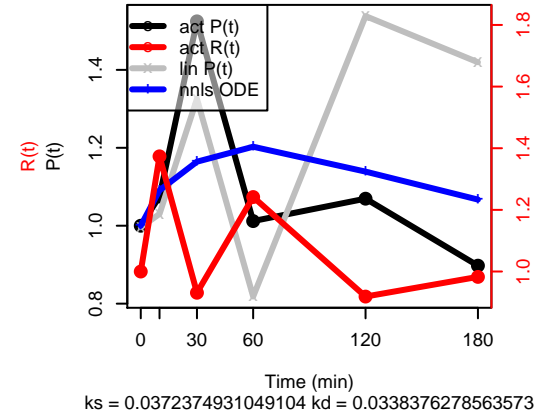

SPBC839.04

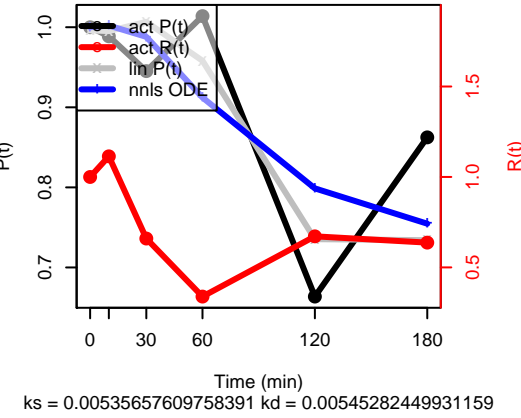

SPBP35G2.12

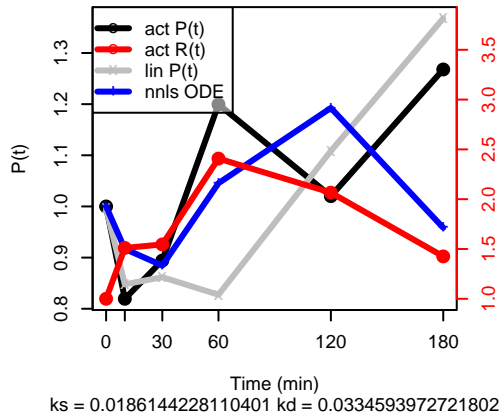

SPCC1442.05c

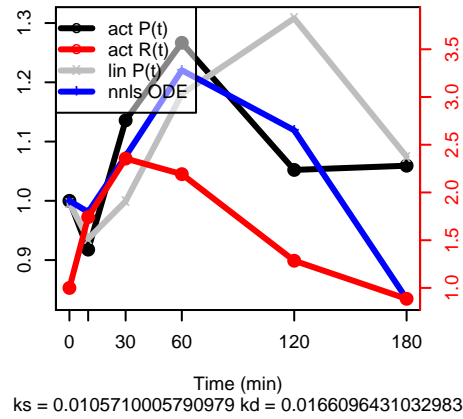

SPCC1442.16c

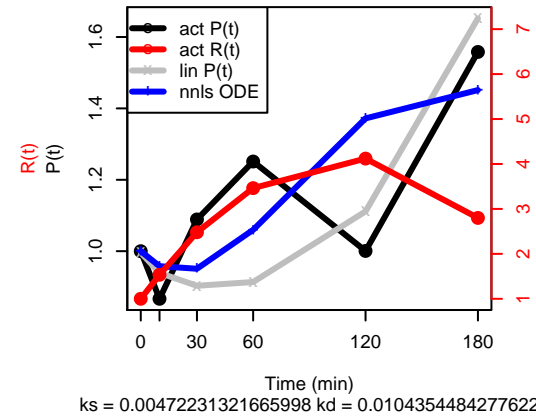

SPCC1450.06c

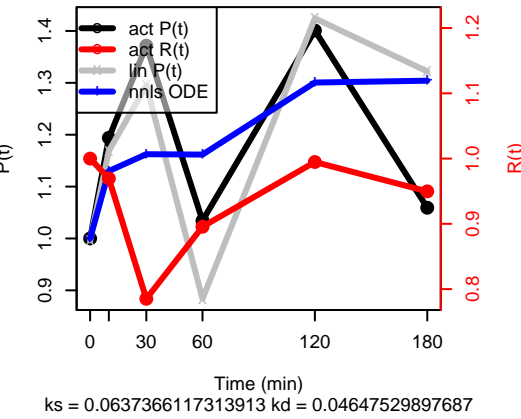

SPCC1450.11c

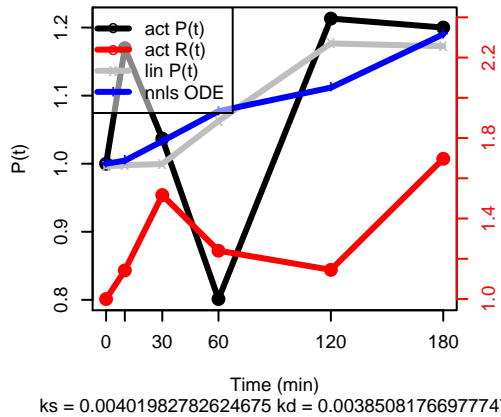

SPCC1682.09c

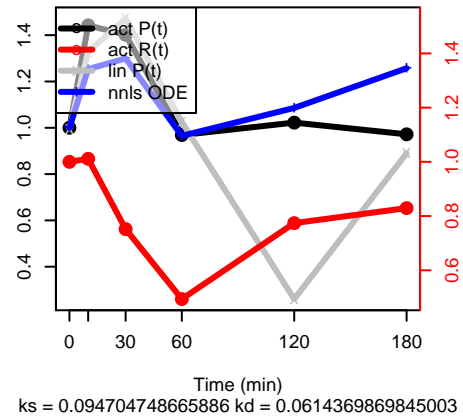

SPCC1682.14

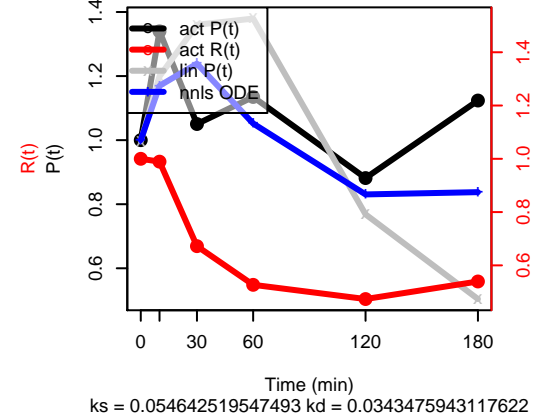

SPCC16A11.10c

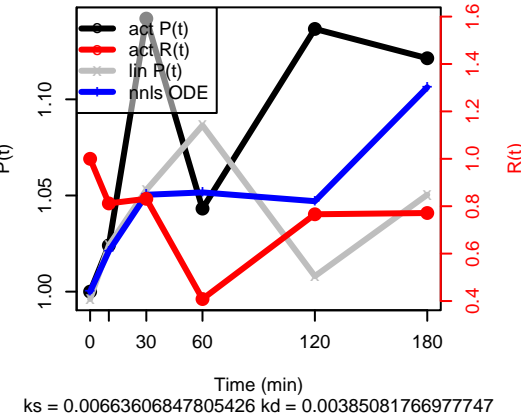

SPCC16A11.14

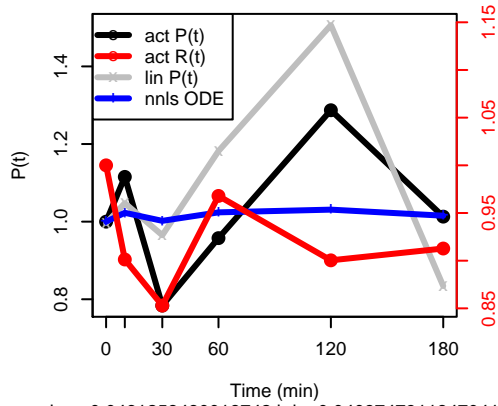

SPCC16C4.08c

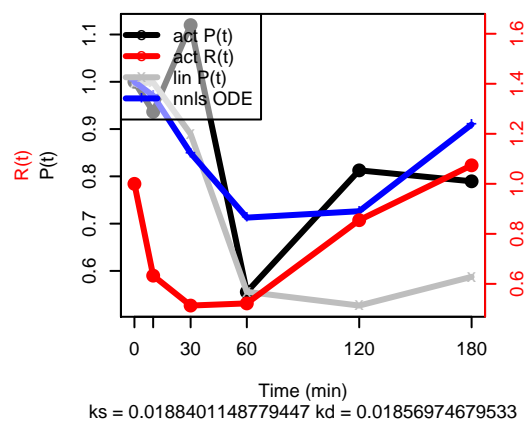

SPCC16C4.15

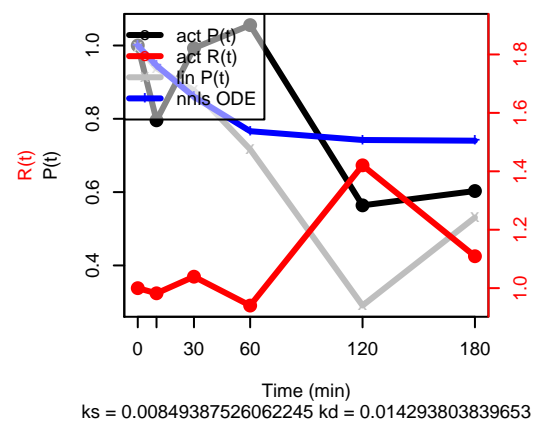

SPCC1840.11

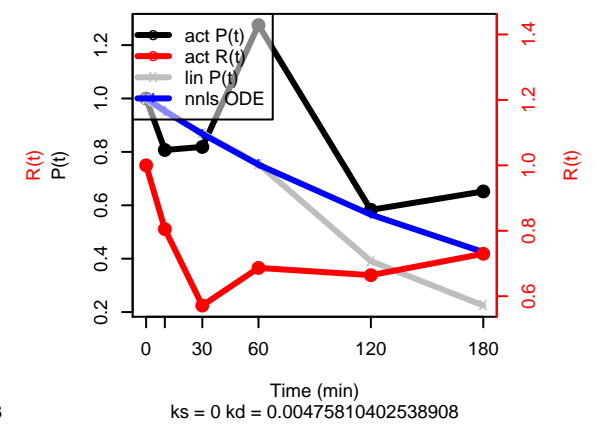

SPCC18B5.06

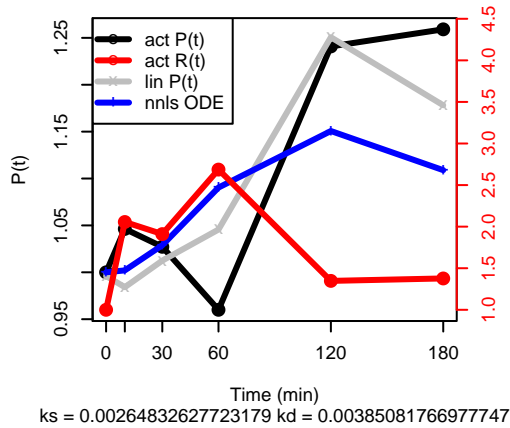

SPCC191.07

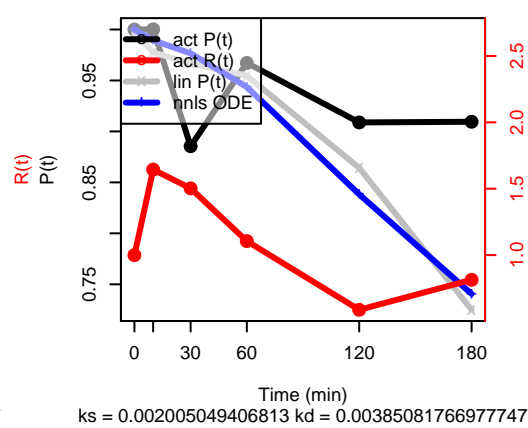

SPCC285.11

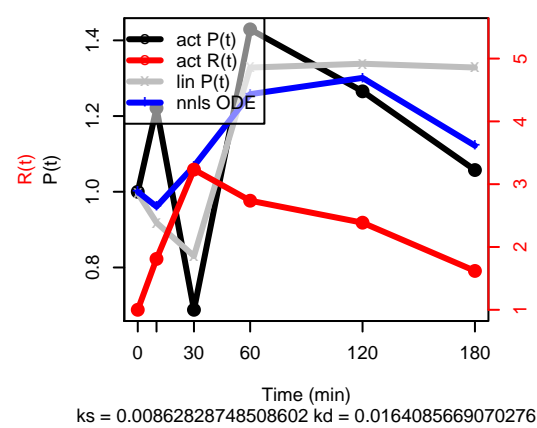

SPCC285.17

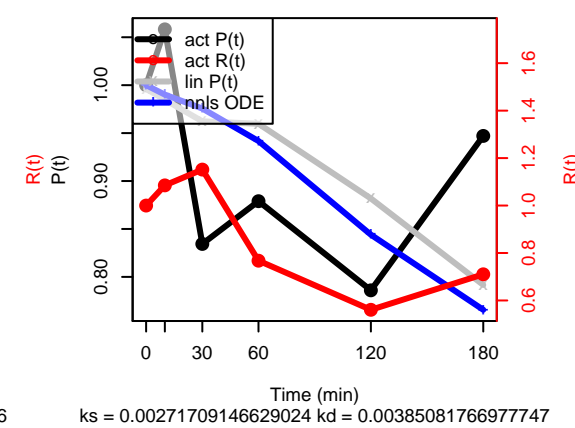

SPCC306.02c

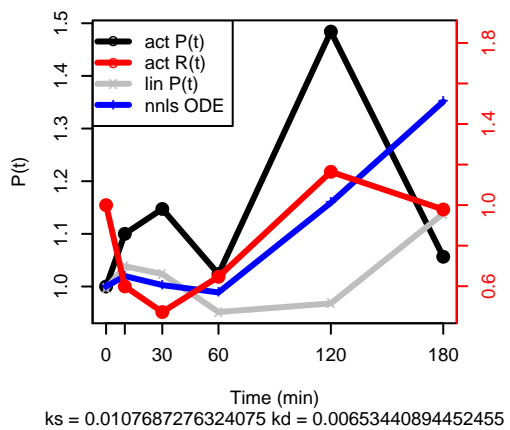

SPCC320.10

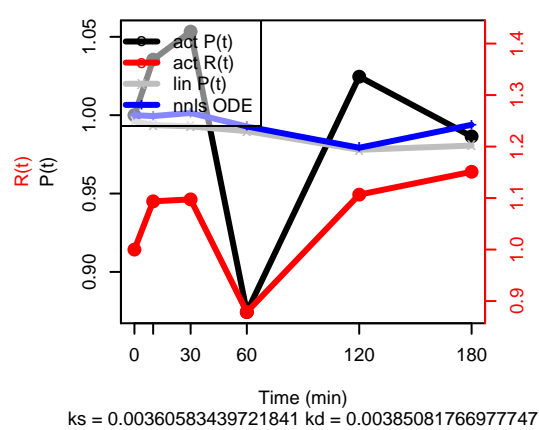

SPCC330.09

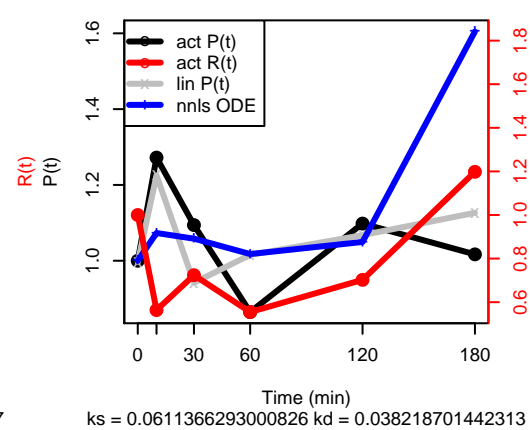

SPCC330.10

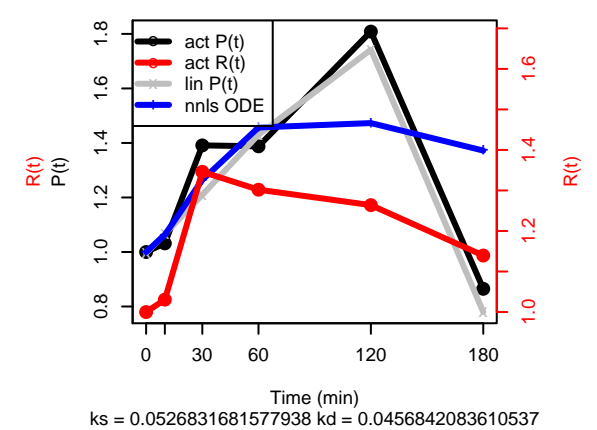

SPCC4B3.01

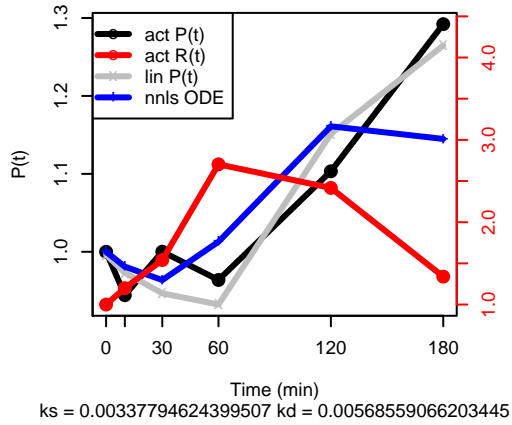

SPCC576.09

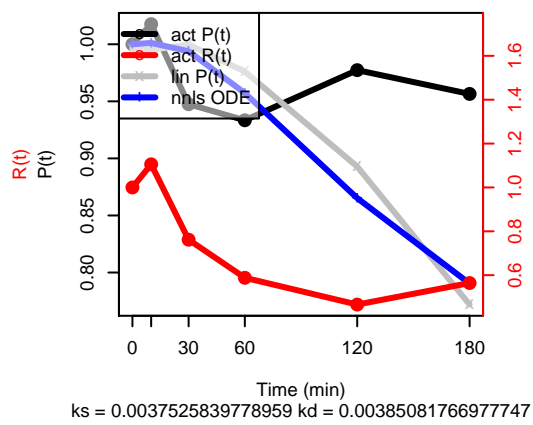

SPCC613.08

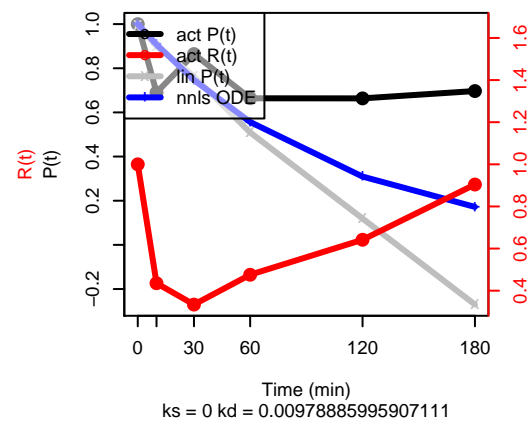

SPCC74.01

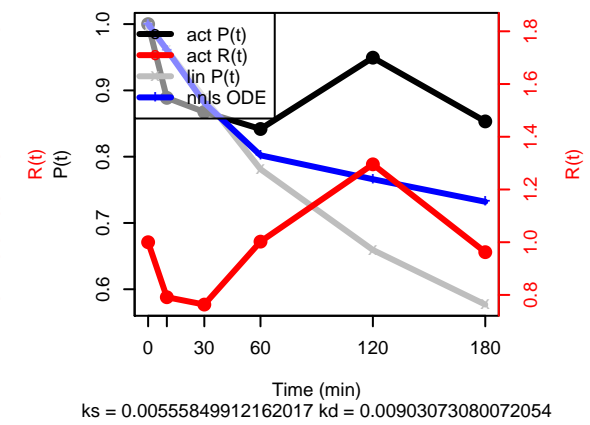

SPCC895.05

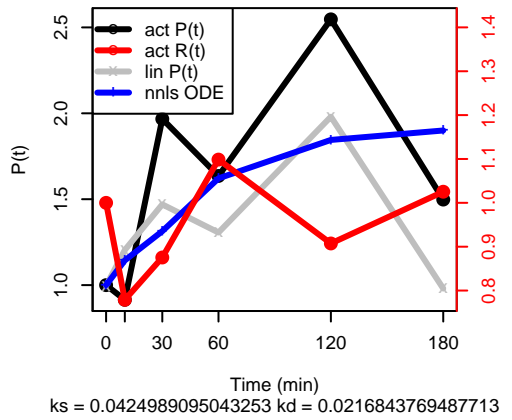

SPCC895.09c

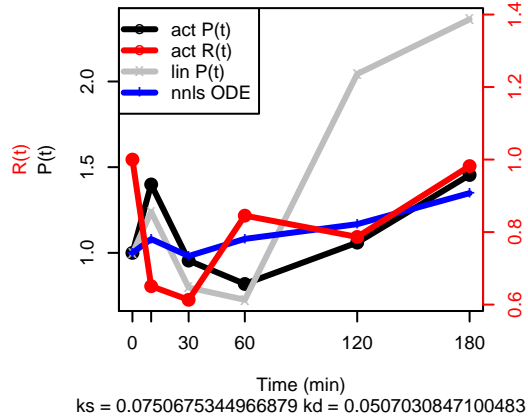

SPCC965.03

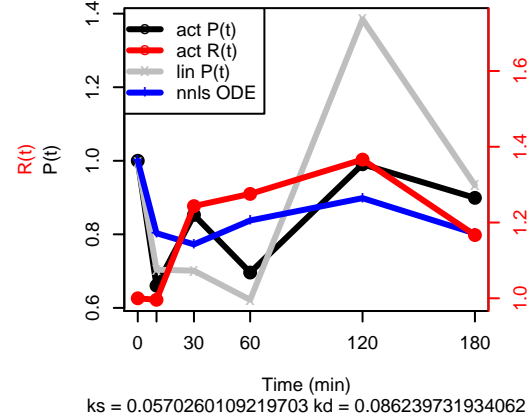

SPCP1E11.10

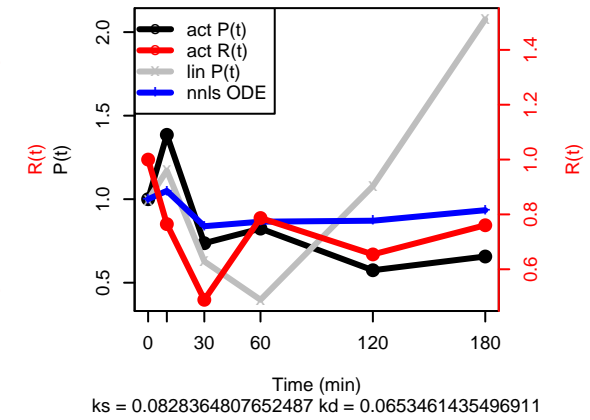

SPAC1142.07c

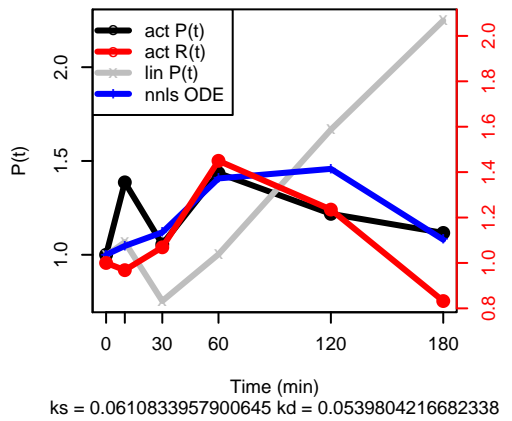

SPAC13G6.06c

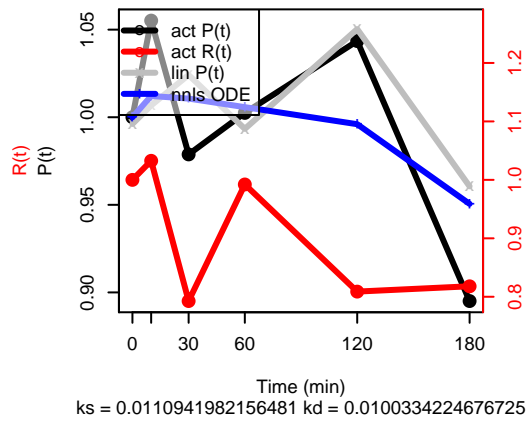

SPAC144.17c

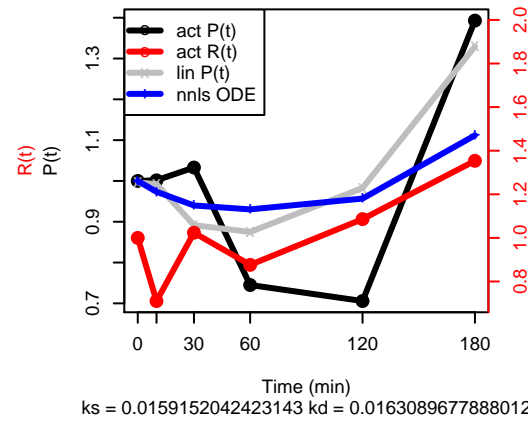

SPAC1486.04c

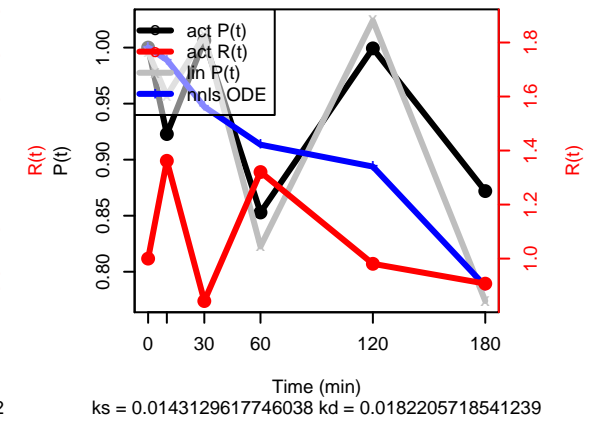

SPAC1782.07

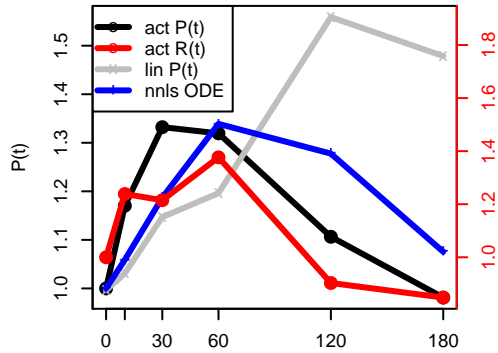

ks = 0.025491176915533 kd = 0.0220176685988426

SPAC17H9.04c

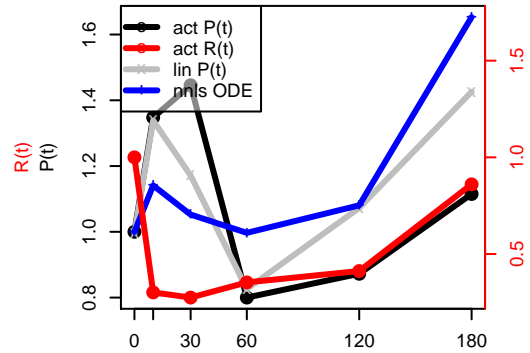

ks = 0.0520953225737188 kd = 0.0178601859968836

SPAC1805.02c

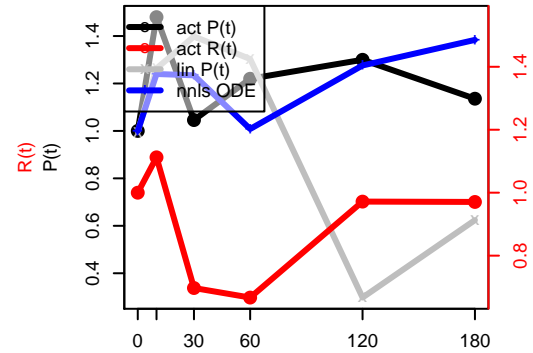

ks = 0.0892147034144165 kd = 0.0625010618202869

SPAC1B3.03c

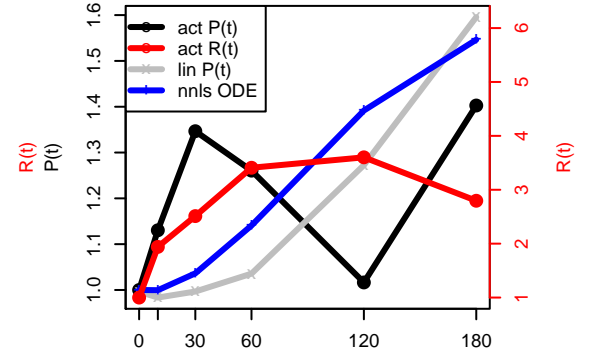

ks = 0.00258216585686048 kd = 0.00385081766977747

SPAC1F7.05

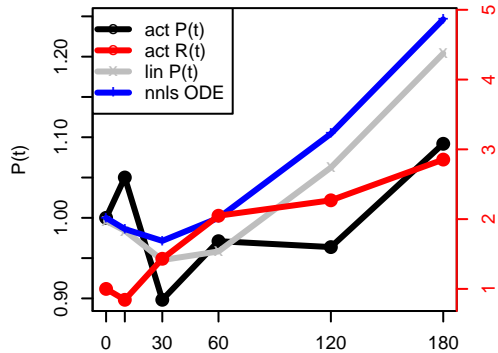

ks = 0.0026969324638543 kd = 0.00390349243367664

SPAC22E12.05c

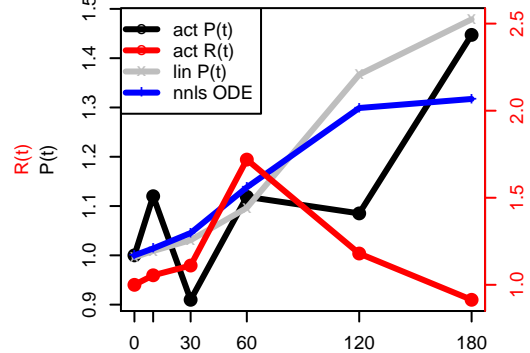

ks = 0.0051255106257678 kd = 0.00385081766977747

SPAC22E12.17c

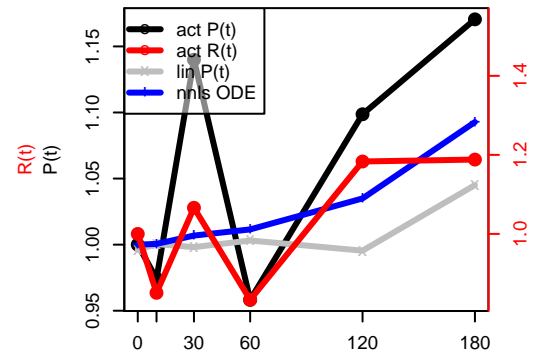

ks = 0.00427451484084115 kd = 0.00385081766977747

SPAC22F8.10c

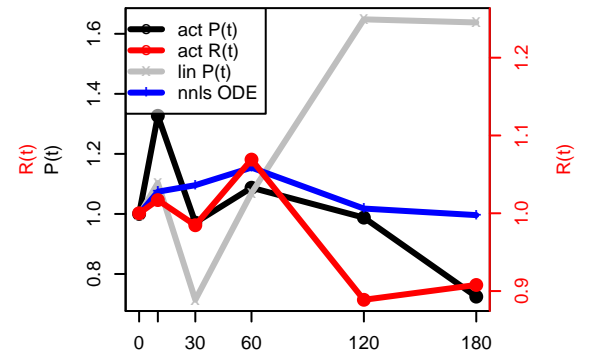

ks = 0.108578514692806 kd = 0.0978817198879741

SPAC23C11.05

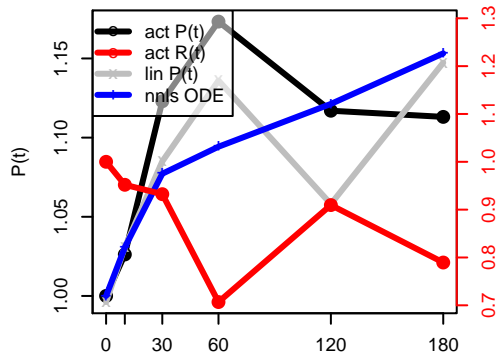

ks = 0.0115141758813704 kd = 0.0080444835126051

SPAC23H3.09c

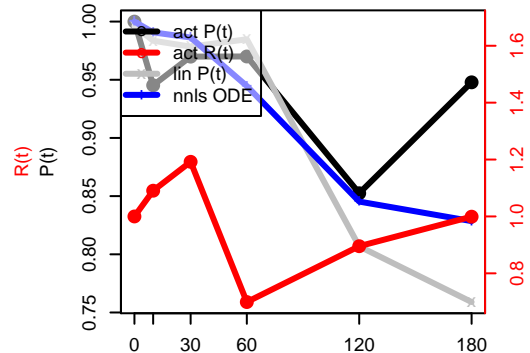

ks = 0.00644007158662319 kd = 0.00769922128199506

SPAC31G5.14

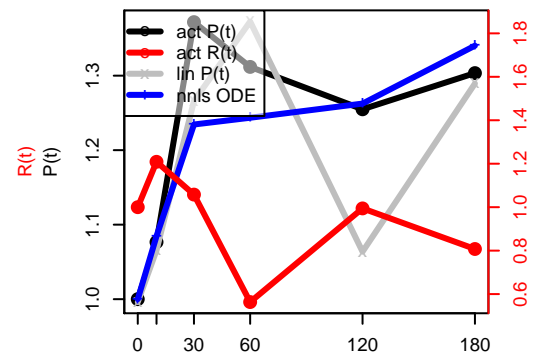

ks = 0.0190711764527305 kd = 0.0121149683874522

SPAC328.02

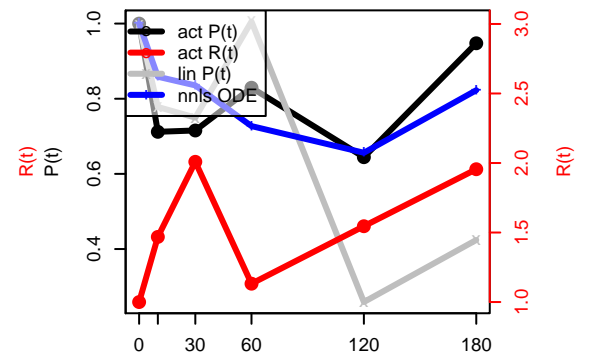

ks = 0.0186554383105735 kd = 0.0404663482137919

SPAC343.05

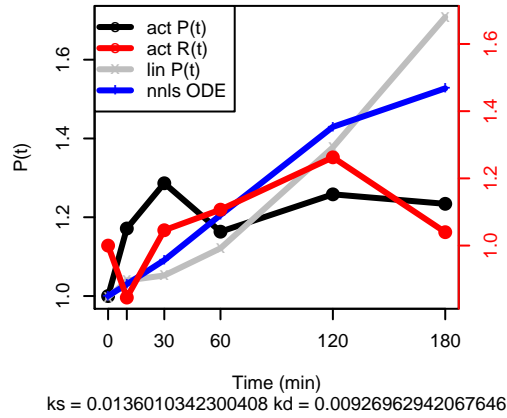

SPAC3A11.07

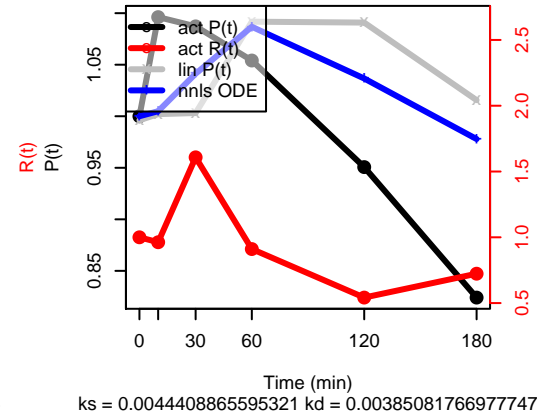

SPAC3F10.03

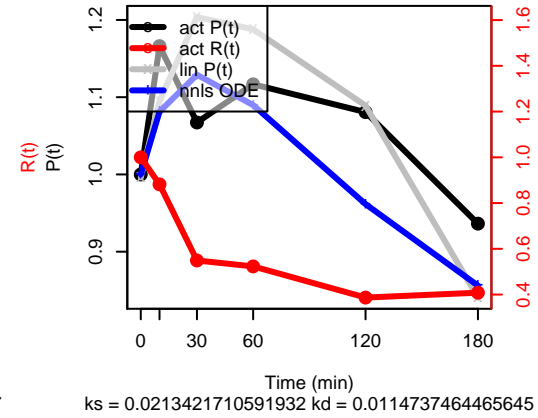

SPAC4G9.12

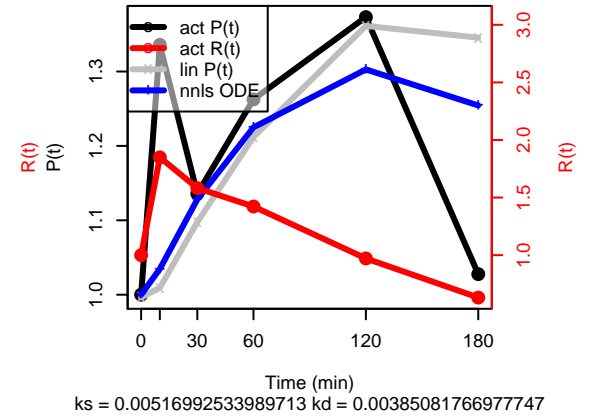

SPAC4G9.13c

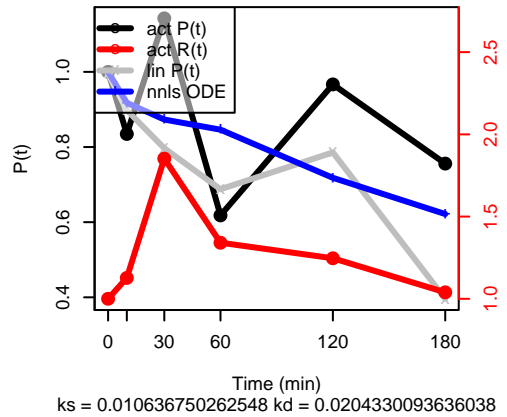

SPAC4H3.01

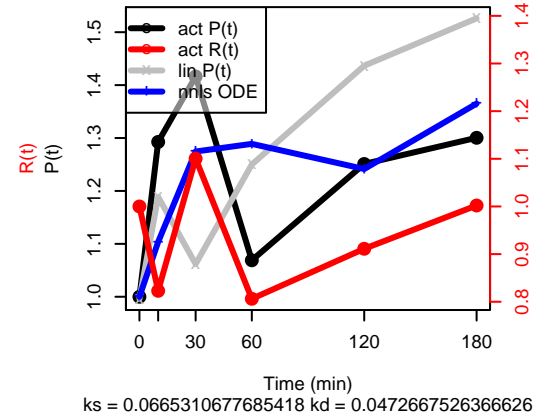

SPAC630.14c

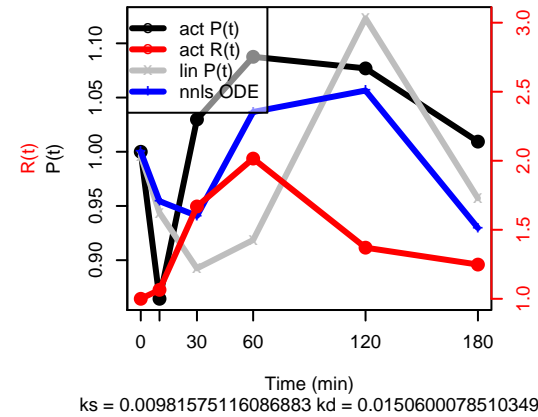

SPAC637.05c

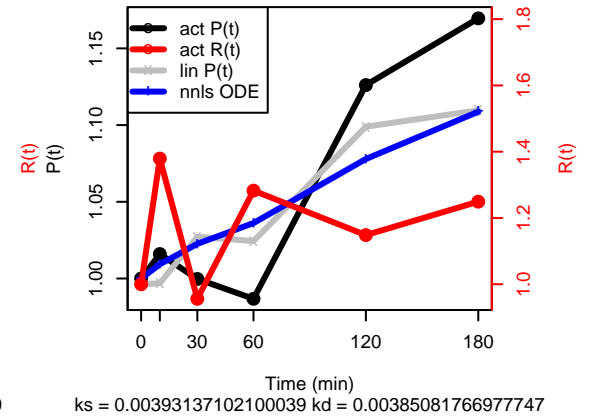

SPAC637.07

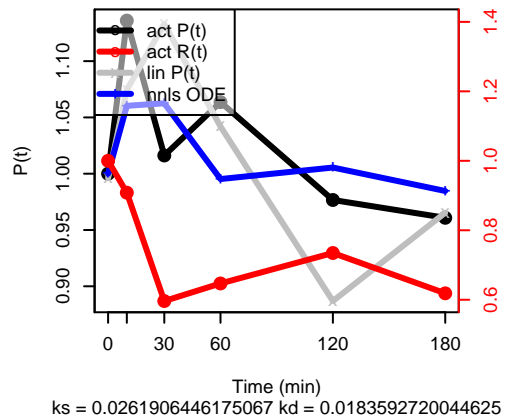

SPAC644.15

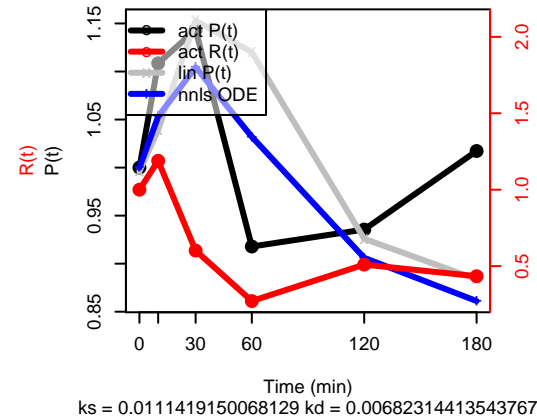

SPAC6B12.09

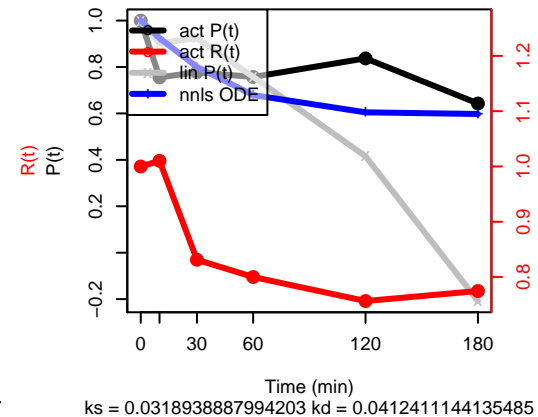

SPAC7D4.02c

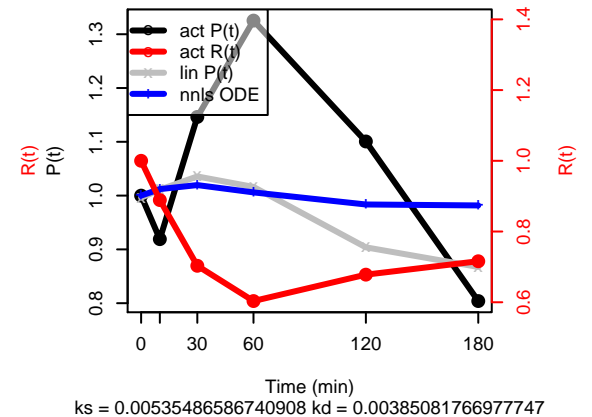

SPAC821.10c

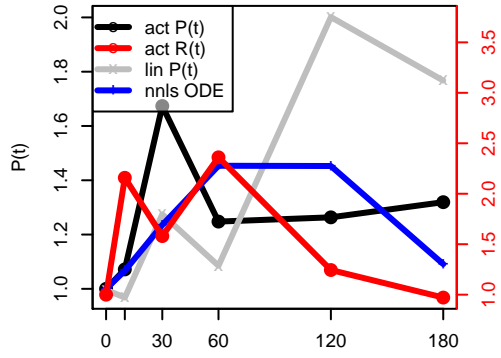

Time (min)  
ks = 0.0168881577429933 kd = 0.0197170628968757

SPAC823.06

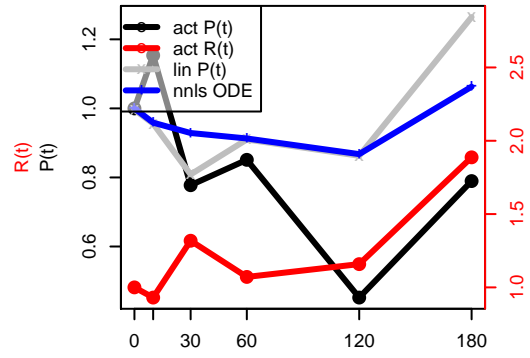

Time (min)  
ks = 0.0120615224234024 kd = 0.0161059035876156

SPAC824.02

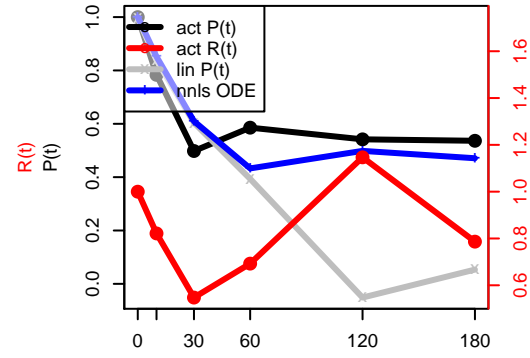

Time (min)  
ks = 0.0170184861093836 kd = 0.0327965250349735

SPAC824.04

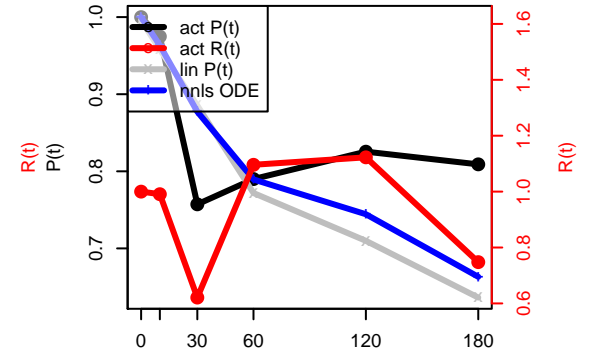

Time (min)  
ks = 0.00650280892667562 kd = 0.0103299645748459

SPAPB1E7.09

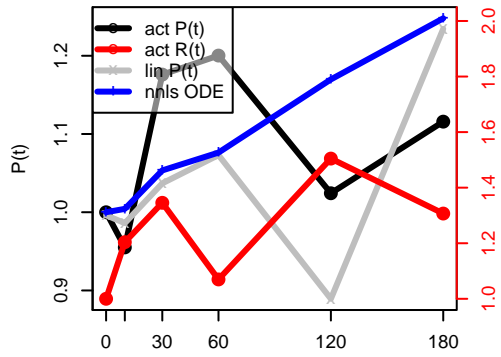

Time (min)  
ks = 0.0141309109938851 kd = 0.0151453134052634

SPBC106.04

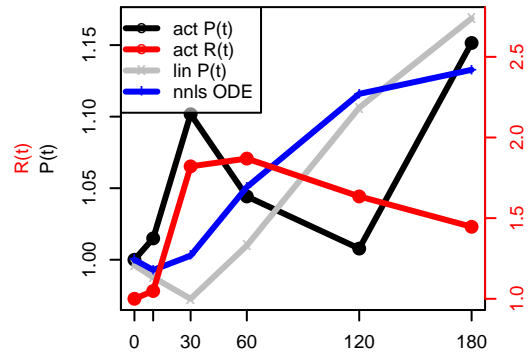

Time (min)  
ks = 0.00301035601774712 kd = 0.00385081766977747

SPBC106.18

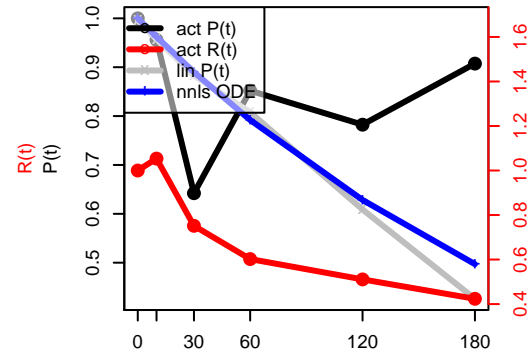

Time (min)  
ks = 0 kd = 0.00389223446593601

SPBC119.06

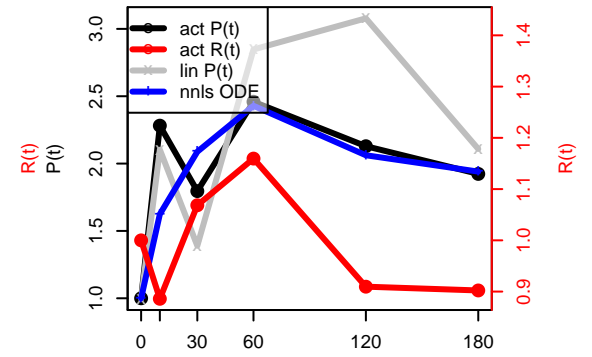

Time (min)  
ks = 0.206520565986968 kd = 0.0958211516493619

SPBC1198.08

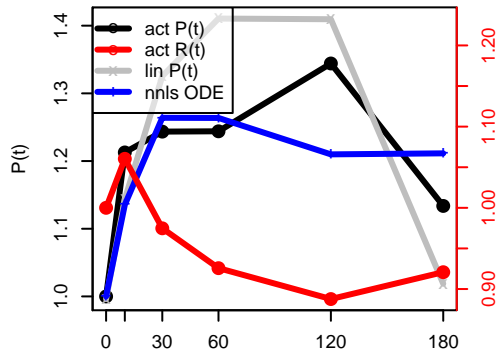

Time (min)  
ks = 0.0576865004665635 kd = 0.0429418920739496

SPBC1271.02

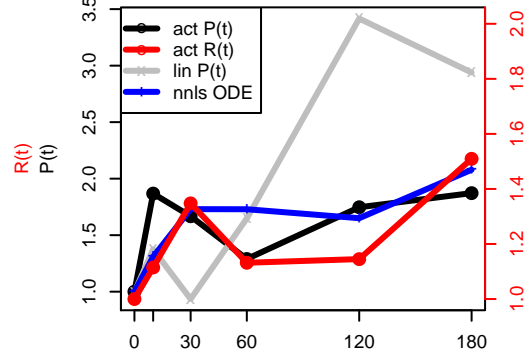

Time (min)  
ks = 0.123170856547112 kd = 0.0852833800790628

SPBC12D12.03

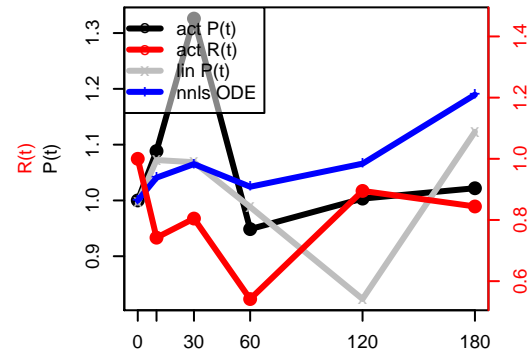

Time (min)  
ks = 0.0245242238727306 kd = 0.0168999923292422

SPBC16C6.12c

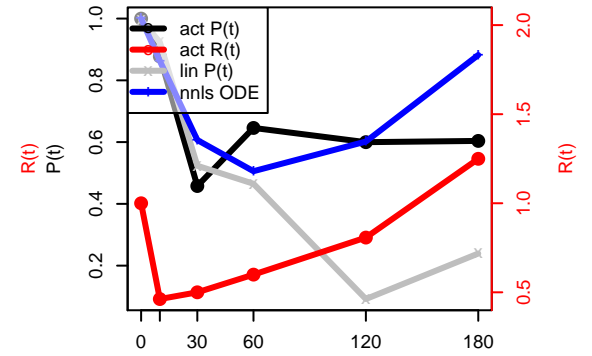

Time (min)  
ks = 0.032829540143048 kd = 0.040096550556218



SPBC1711.07

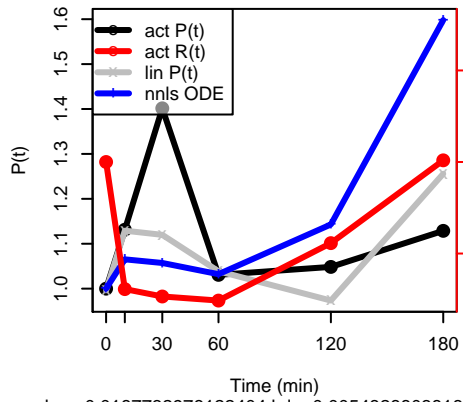

SPBC1734.01c

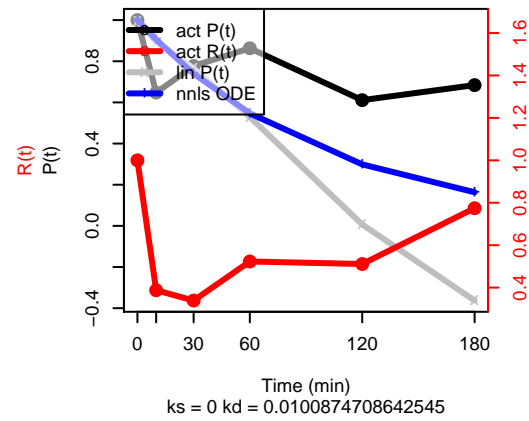

SPBC19F5.03

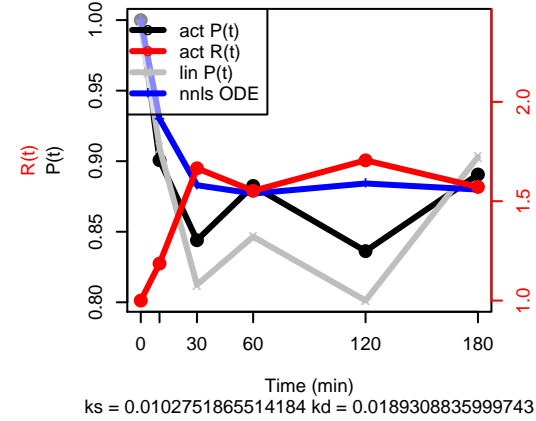

SPBC23G7.15c

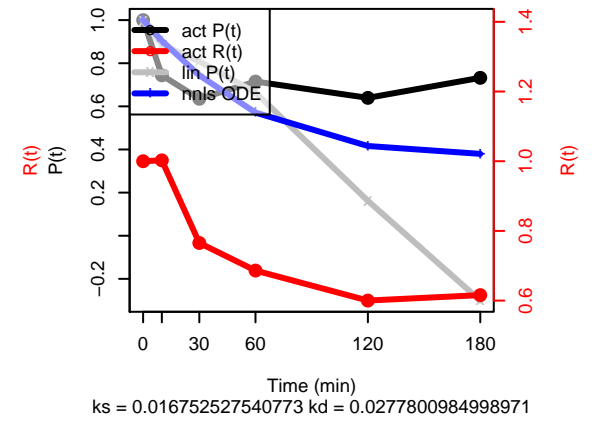

SPBC25D12.05

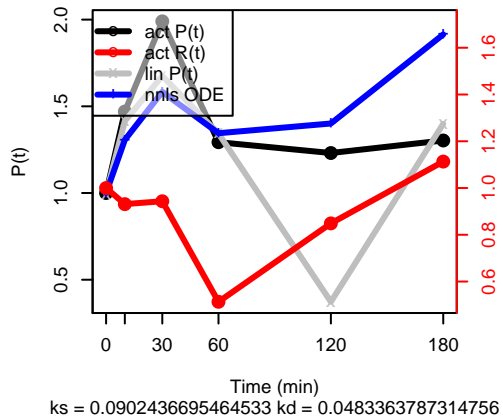

SPBC25H2.05

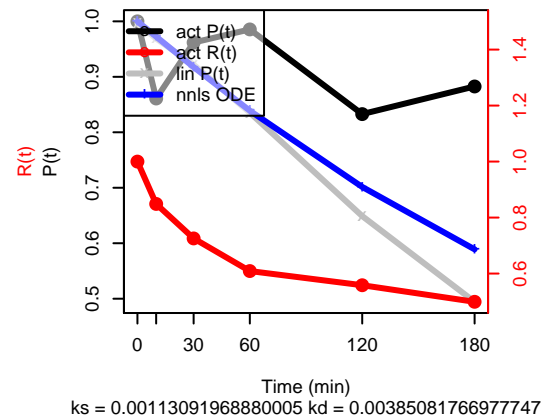

SPBC25H2.16c

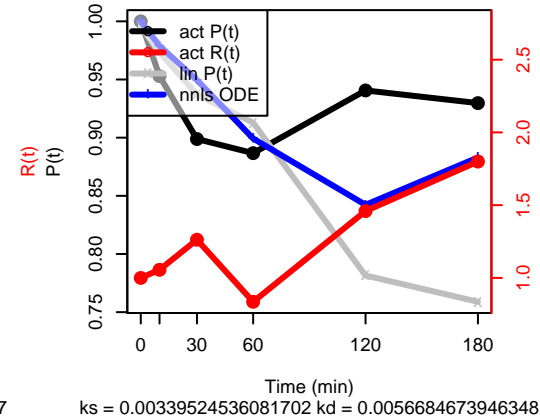

SPBC26H8.09c

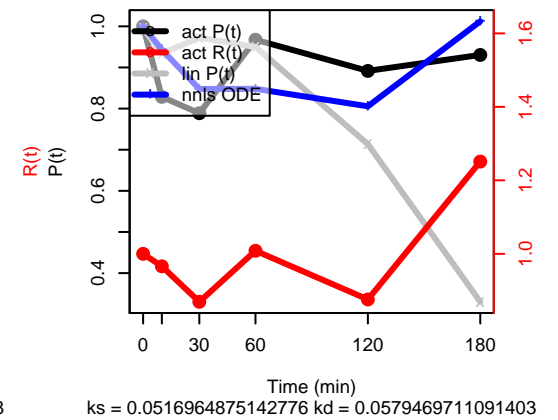

SPBC30D10.18c

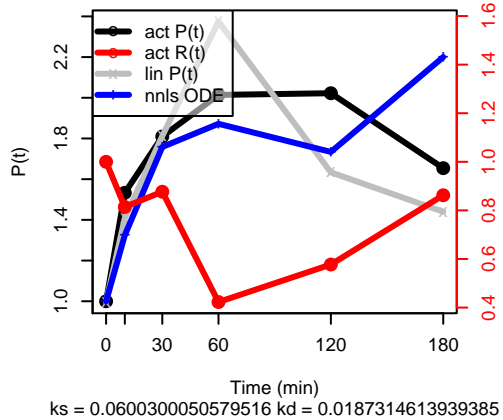

SPBC31F10.06c

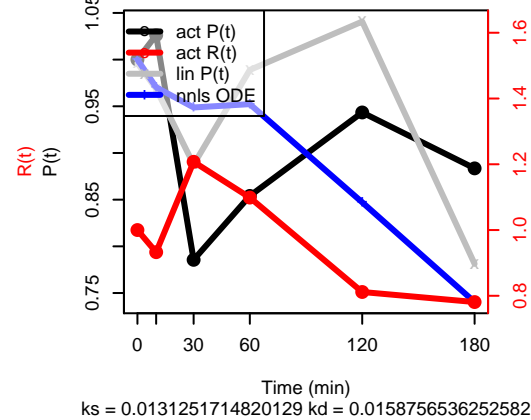

SPBC365.04c

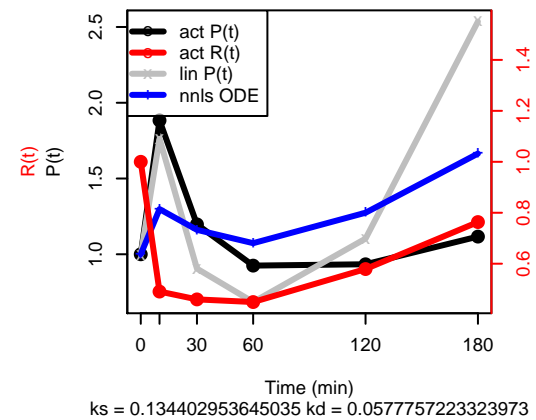

SPBC365.16

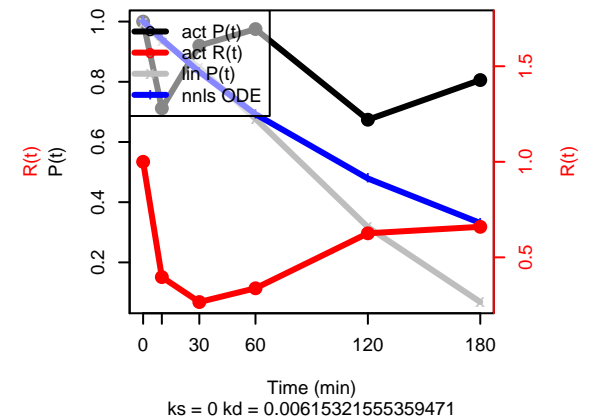

SPBC428.03c

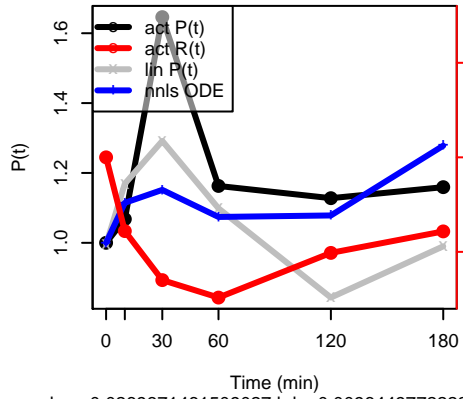

SPBC4F6.05c

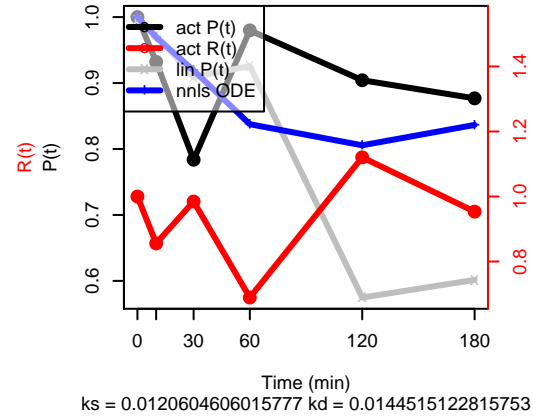

SPBC4F6.14

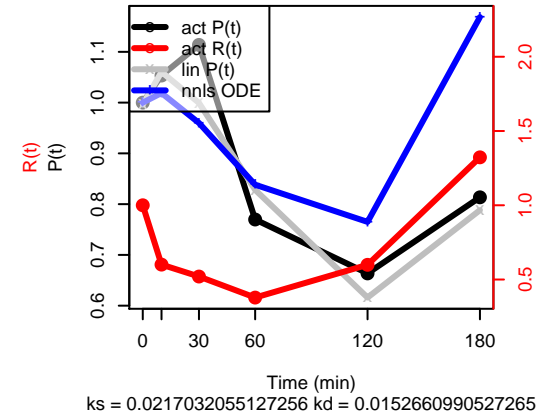

SPBC543.09

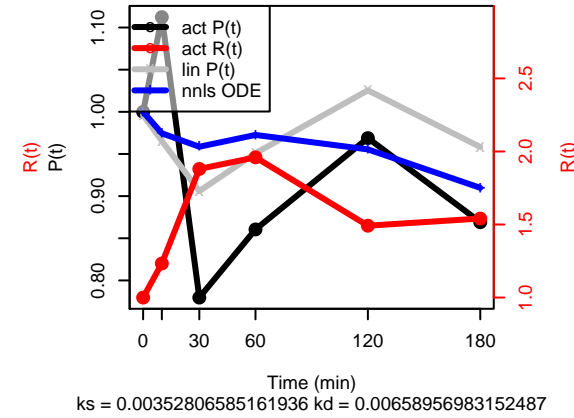

SPBC577.08c

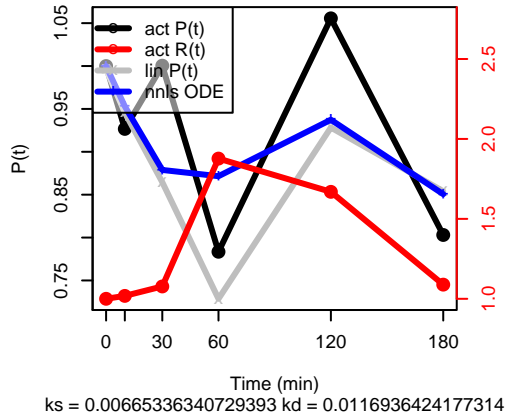

SPBC646.11

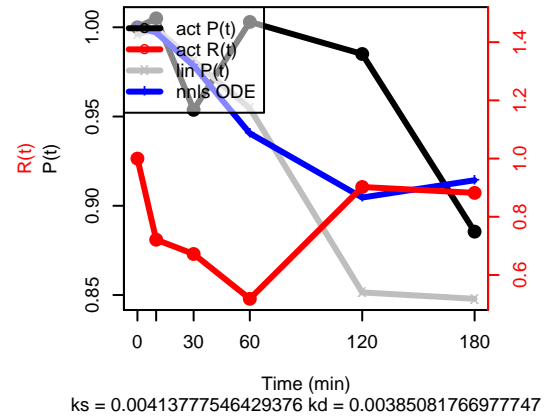

SPBC660.13c

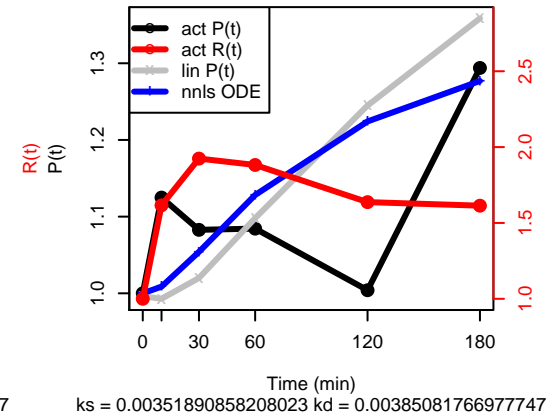

SPBC685.07c

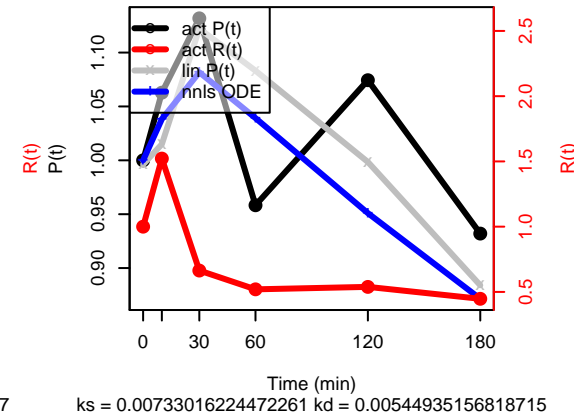

SPBC800.03

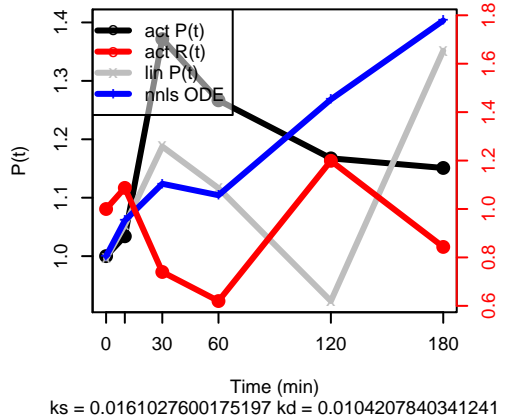

SPBC839.02

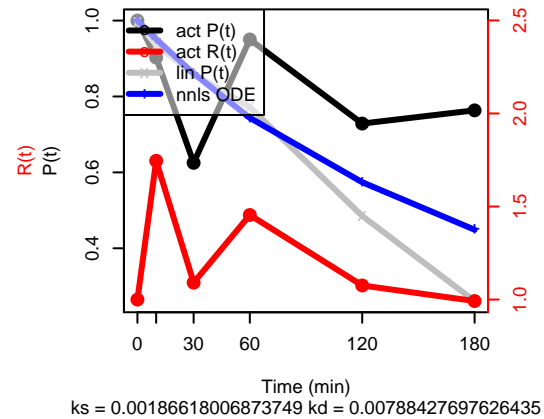

SPBC839.17c

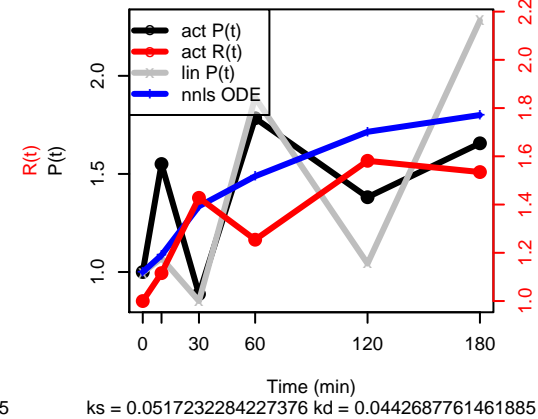

SPBC887.10

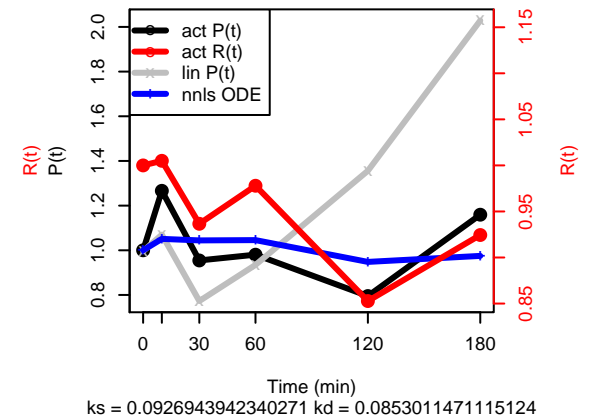

SPBP22H7.08

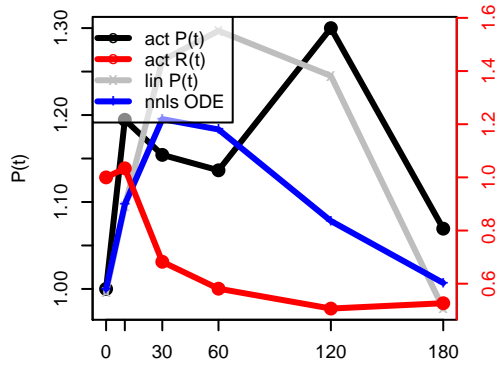

Time (min)  
ks = 0.0219102253887009 kd = 0.0119679709388694

SPBP26C9.02c

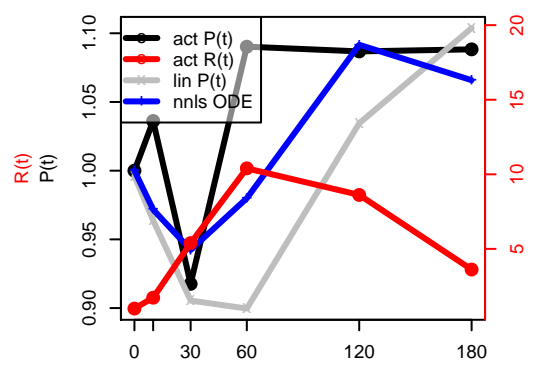

Time (min)  
ks = 0.000619617631451942 kd = 0.00385081766977747

SPCC1020.10

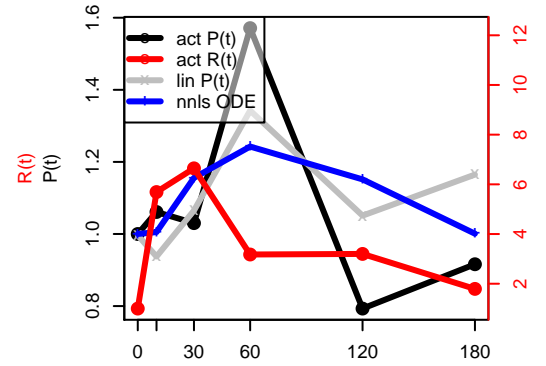

Time (min)  
ks = 0.00272501799530035 kd = 0.00860058418695538

SPCC1393.13

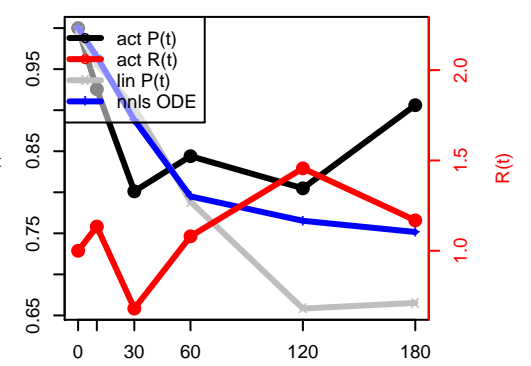

Time (min)  
ks = 0.00512119991845651 kd = 0.00912403629177951

SPCC1442.10c

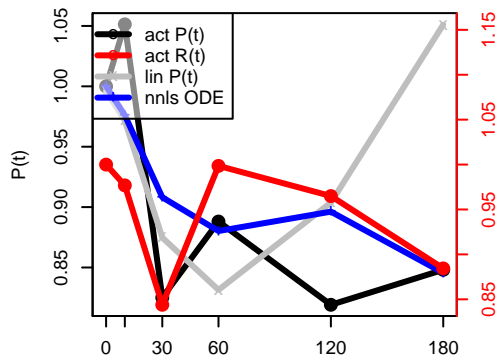

Time (min)  
ks = 0.0305602026861612 kd = 0.0330055664780494

SPCC16A11.09c

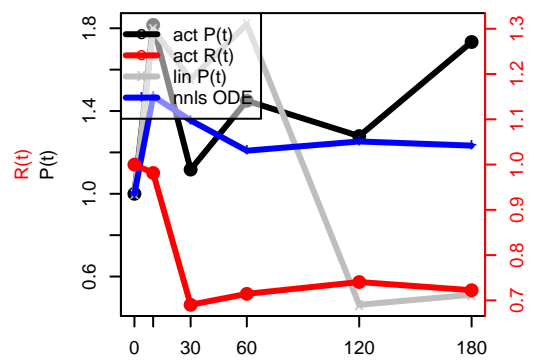

Time (min)  
ks = 0.188119328414378 kd = 0.108298801631345

SPCC16C4.10

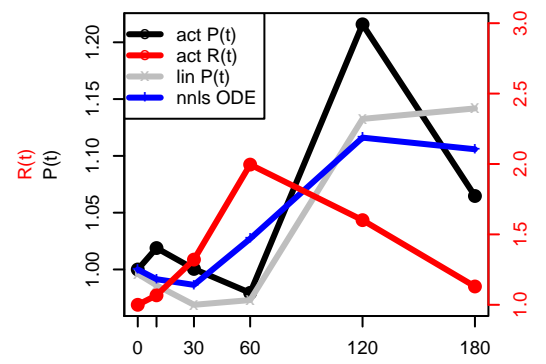

Time (min)  
ks = 0.00358922457919165 kd = 0.00460051881912983

SPCC1840.09

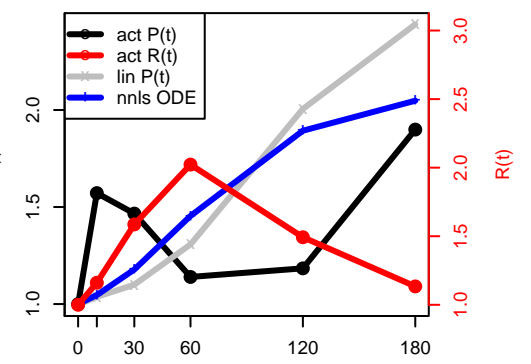

Time (min)  
ks = 0.00792215757219888 kd = 0.00385081766977747

SPCC1906.01

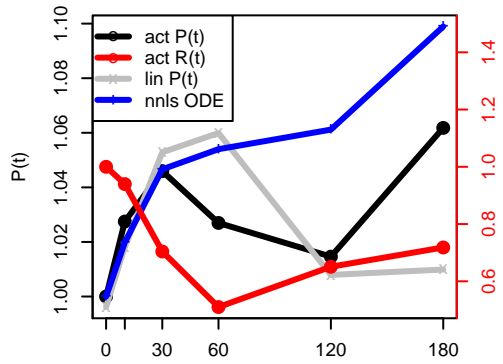

Time (min)  
ks = 0.00605426477376364 kd = 0.00385081766977747

SPCC24B10.09

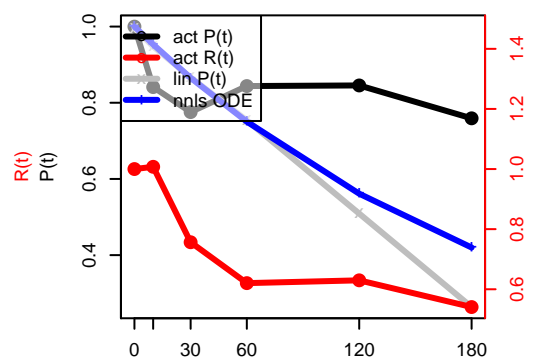

Time (min)  
ks = 0 kd = 0.00483621239800869

SPCC417.07c

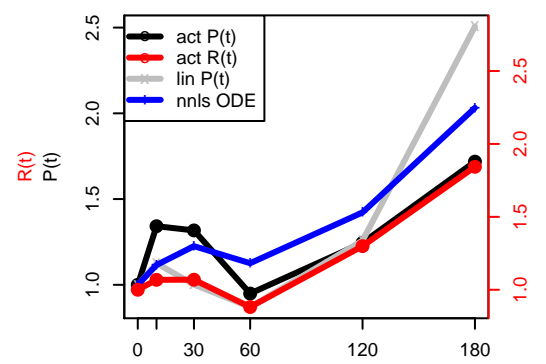

Time (min)  
ks = 0.0862139395542946 kd = 0.0732729605305106

SPCC4G3.15c

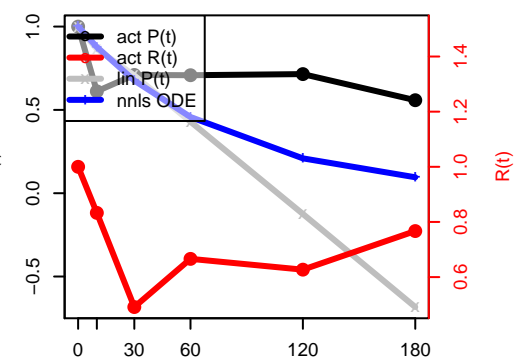

Time (min)  
ks = 0 kd = 0.0130262530962872

SPCC4G3.18

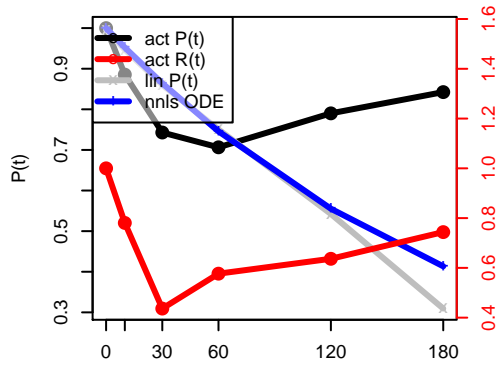

Time (min)  
ks = 0 kd = 0.00491303621219702

SPCC584.11c

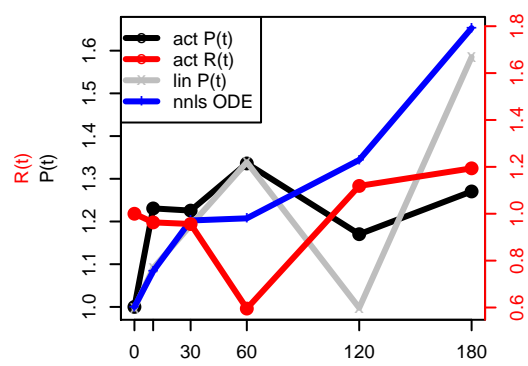

Time (min)  
ks = 0.0247368295285814 kd = 0.0152825536164643

SPCC622.09

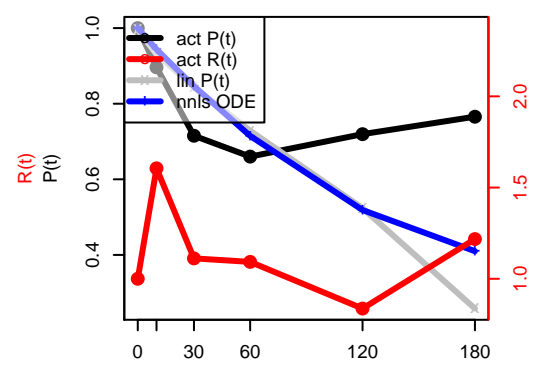

Time (min)  
ks = 0.00200330593001888 kd = 0.00848396258768439

SPCC645.10

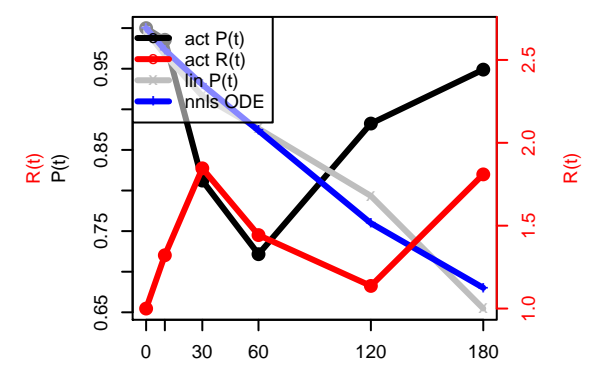

Time (min)  
ks = 0.000986978592317594 kd = 0.00389095161776441

SPCC757.09c

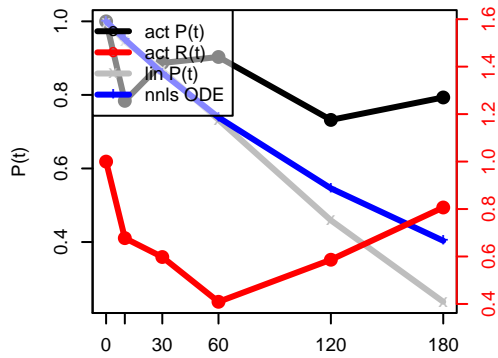

Time (min)  
ks = 0 kd = 0.00504470388321564

SPCC777.06c

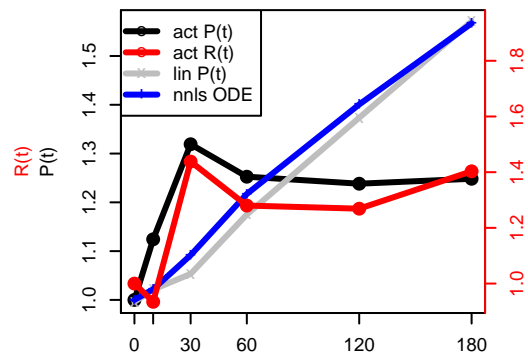

Time (min)  
ks = 0.00635226159509486 kd = 0.00385081766977747

SPAC10F6.15

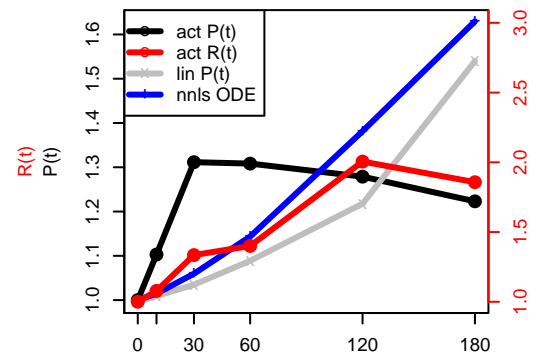

Time (min)  
ks = 0.00513189552829622 kd = 0.00385081766977747

SPAC1250.05

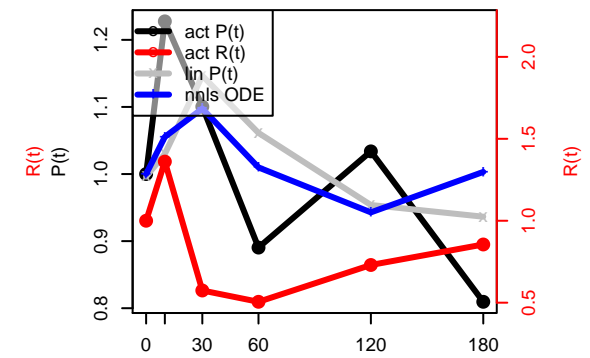

Time (min)  
ks = 0.0124821735862498 kd = 0.0090959191302629

SPAC12G12.05c

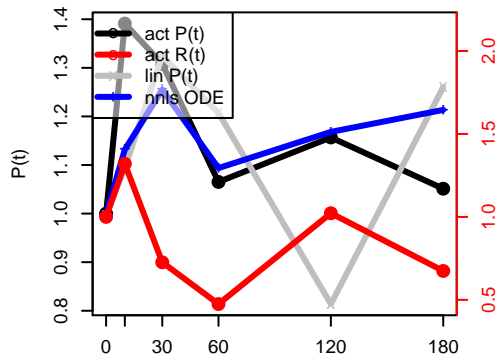

Time (min)  
ks = 0.0287274027275253 kd = 0.018957006828444

SPAC12G12.06c

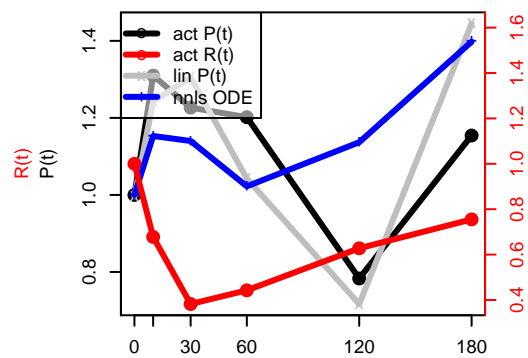

Time (min)  
ks = 0.0461790182017713 kd = 0.0215238029690058

SPAC139.06

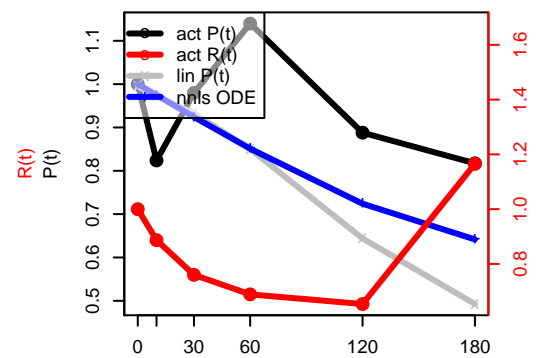

Time (min)  
ks = 0.0013731552081938 kd = 0.00385081766977747

SPAC13F5.02c

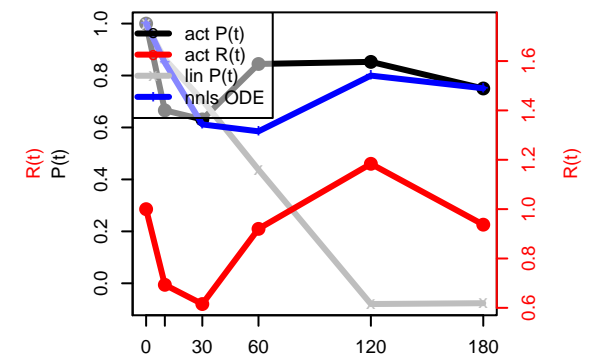

Time (min)  
ks = 0.0343795806025486 kd = 0.0476700734516723

SPAC16E8.11c

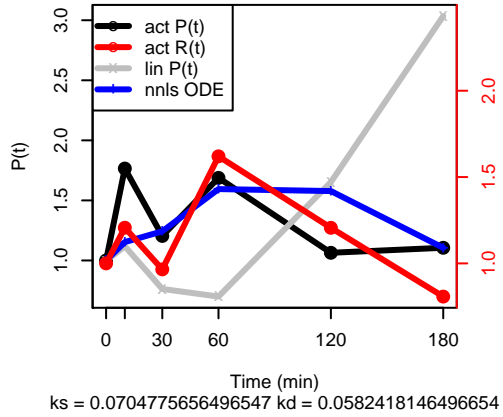

SPAC17A2.04c

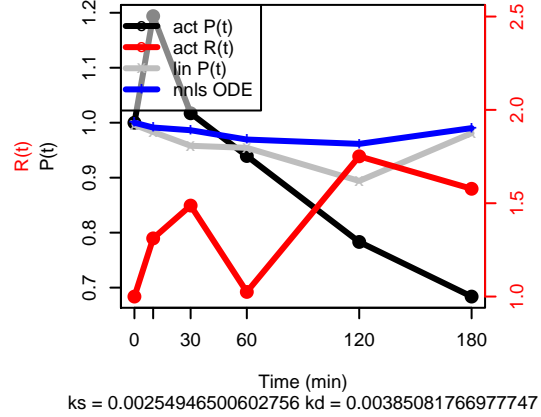

SPAC18G6.04c

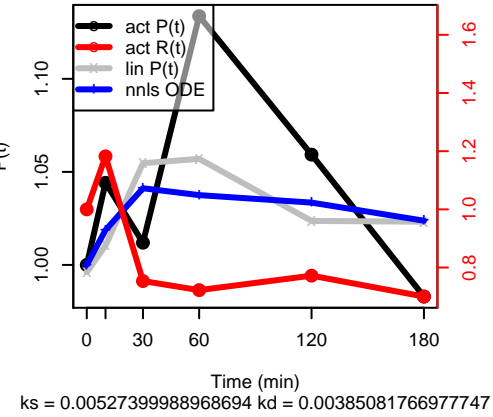

SPAC1A6.10

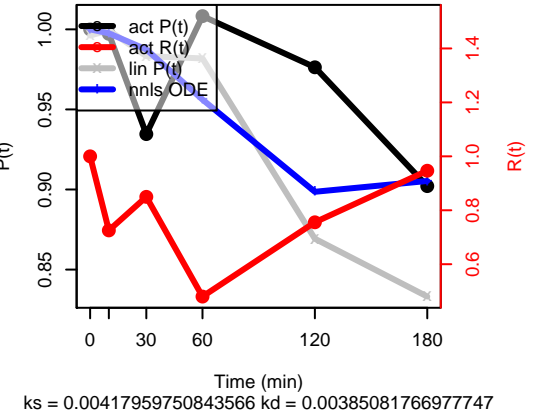

SPAC1F5.04c

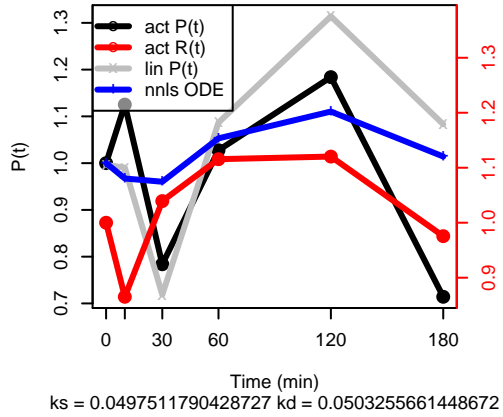

SPAC1F7.09c

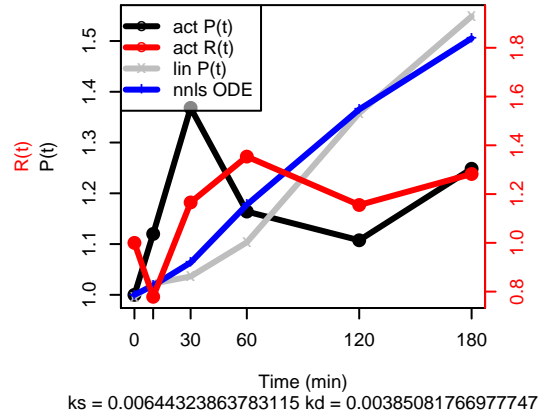

SPAC22E12.03c

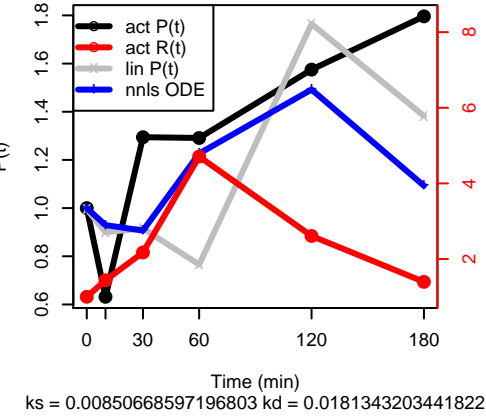

SPAC22E12.10c

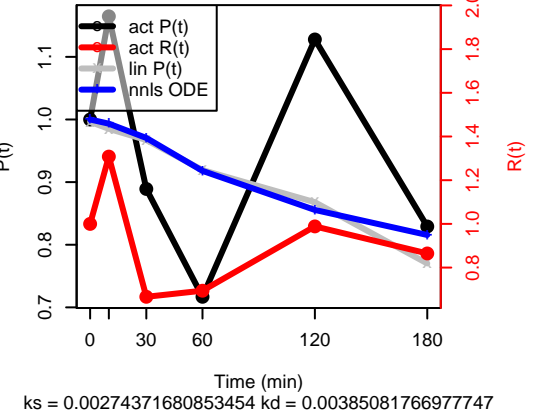

SPAC25B8.04c

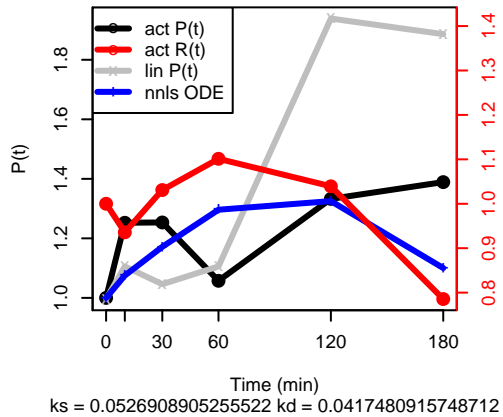

SPAC25B8.12c

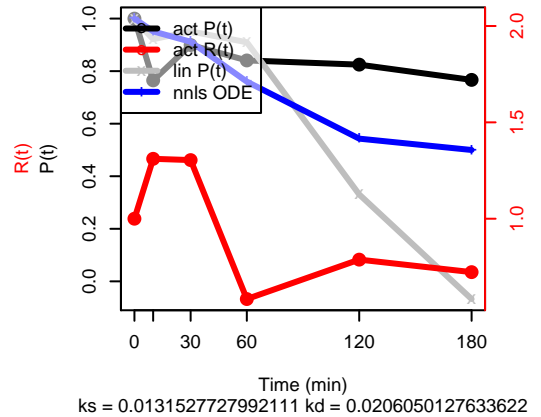

SPAC26A3.02

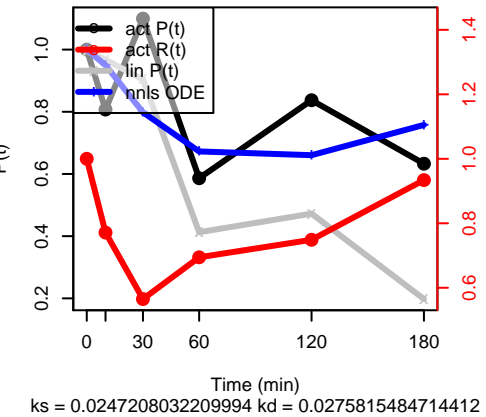

SPAC2F3.04c

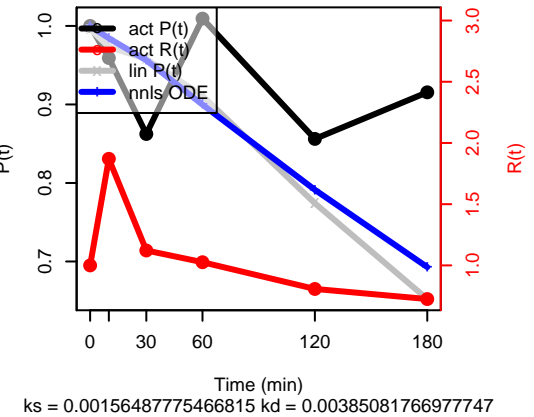

SPAC31A2.09c

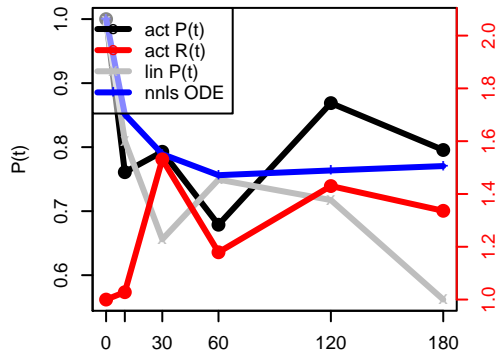

SPAC323.04

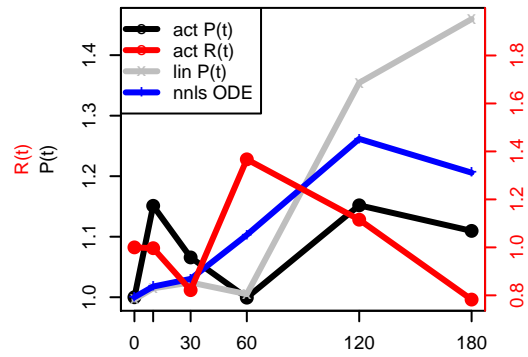

SPAC3G6.05

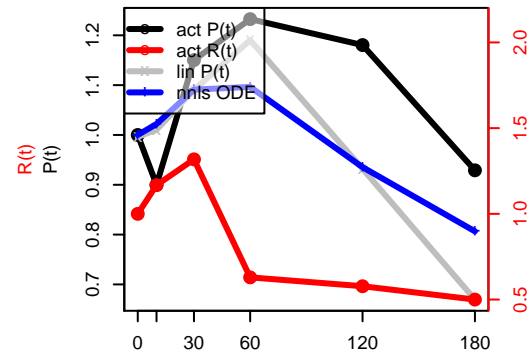

SPAC3H1.09c

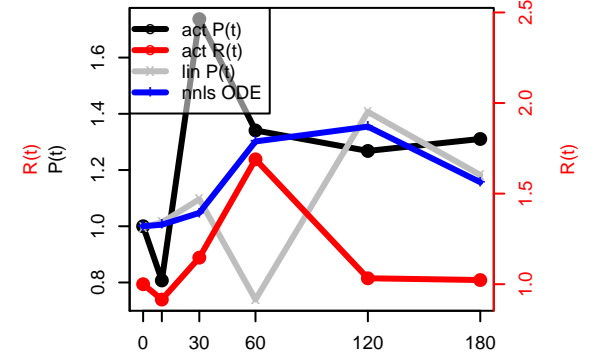

SPAC4A8.12c

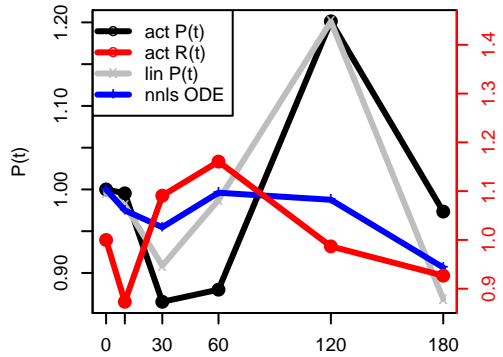

SPAC4C5.02c

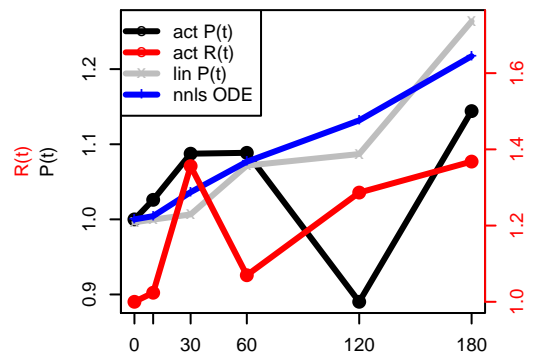

SPAC4D7.04c

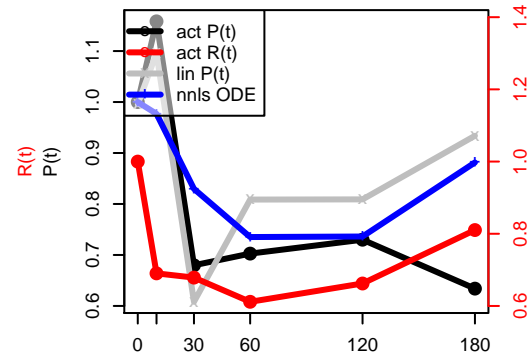

SPAC4D7.13

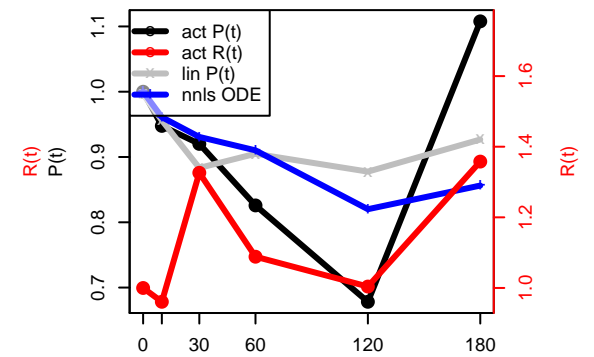

SPAC56E4.07

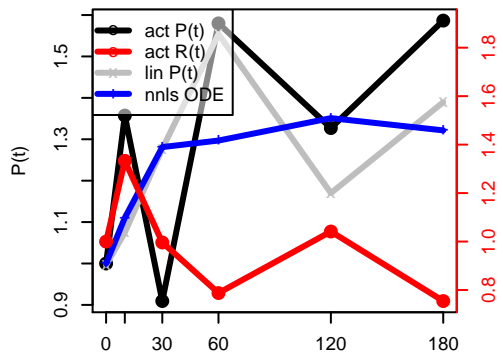

SPAC5H10.05c

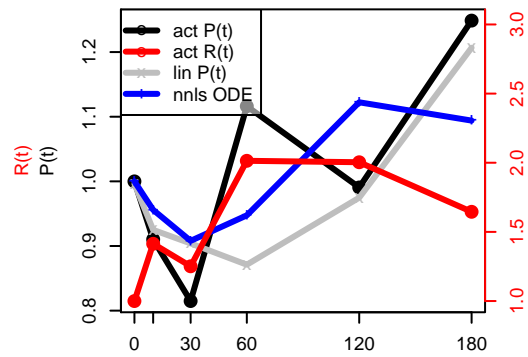

SPAC637.09

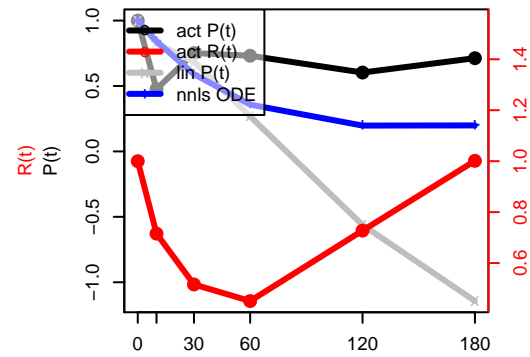

SPAC6B12.15

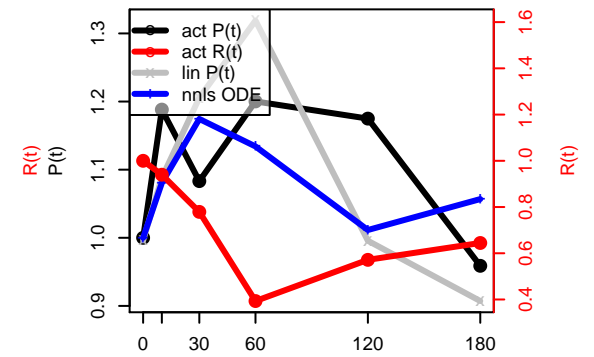

SPAC6F6.15

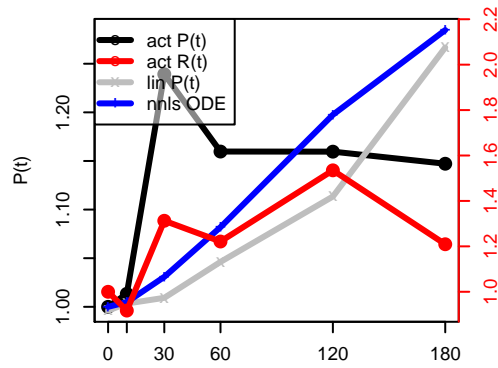

ks = 0.00457366974091182 kd = 0.00385081766977747

SPAC6G10.02c

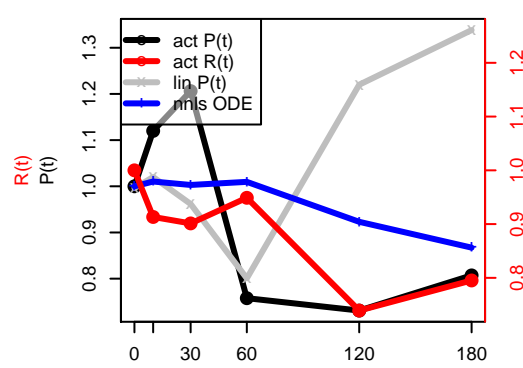

ks = 0.0270666553377348 kd = 0.0246749404177265

SPBC1271.14

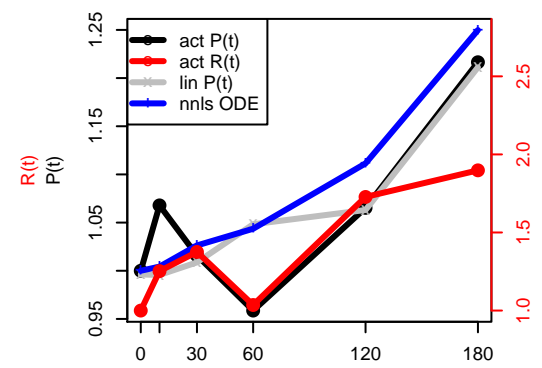

ks = 0.00380296270824706 kd = 0.00385081766977747

SPBC1289.02c

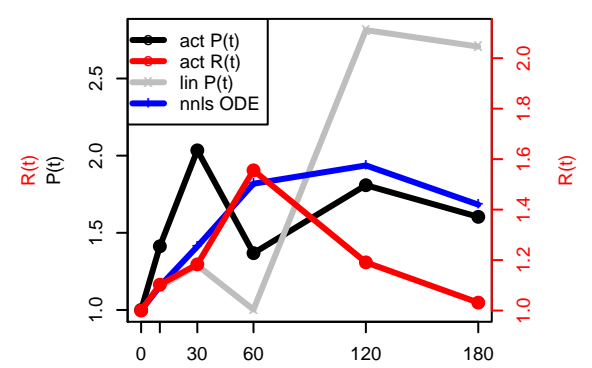

ks = 0.0481760257978912 kd = 0.0327110208133529

SPBC1289.16c

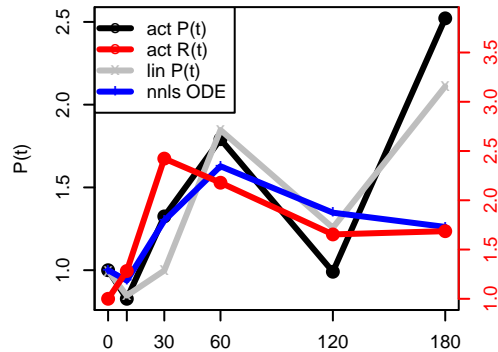

ks = 0.0438084644358119 kd = 0.0587617018953239

SPBC13E7.02

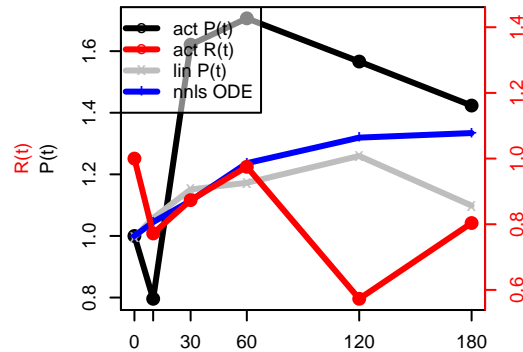

ks = 0.012482257958716 kd = 0.00628102271299184

SPBC14F5.03c

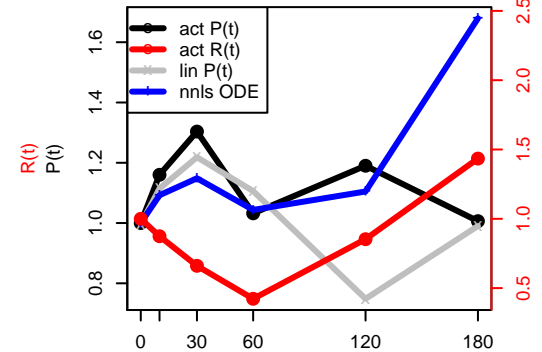

ks = 0.0298056076298876 kd = 0.0179838046851189

SPBC16A3.05c

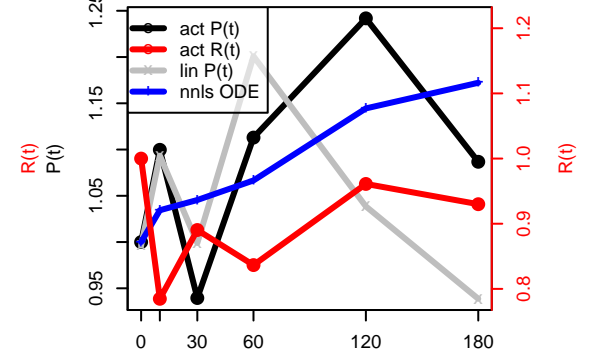

ks = 0.0489331450679084 kd = 0.0392110216669196

SPBC16A3.09c

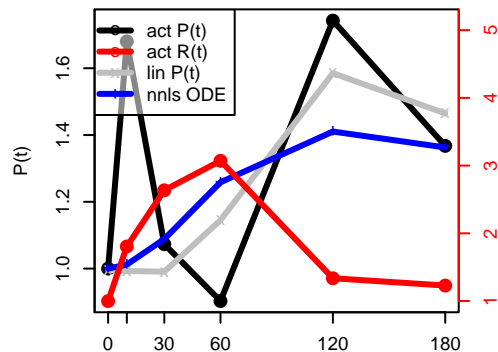

ks = 0.00352113307790345 kd = 0.00385081766977747

SPBC16E9.02c

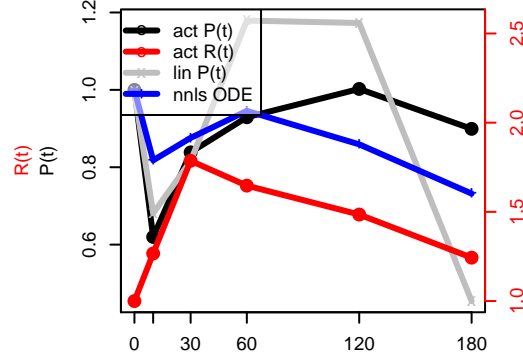

ks = 0.0406620595300572 kd = 0.0721841899401747

SPBC16G5.14c

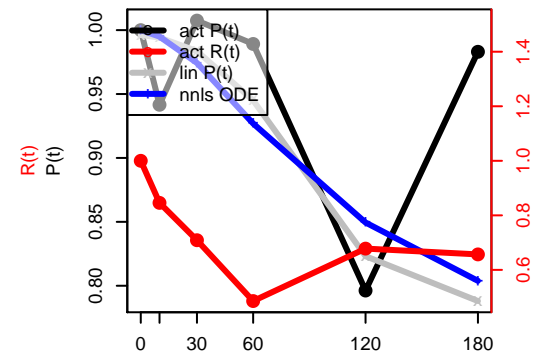

ks = 0.00365918812609934 kd = 0.00385081766977747

SPBC1709.17

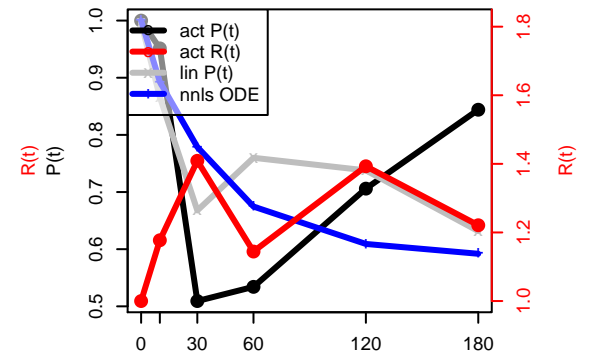

ks = 0.0107700587497303 kd = 0.0237613667057141



SPBC1711.05

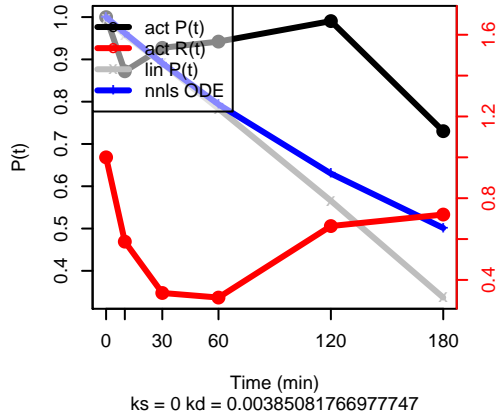

SPBC1711.13

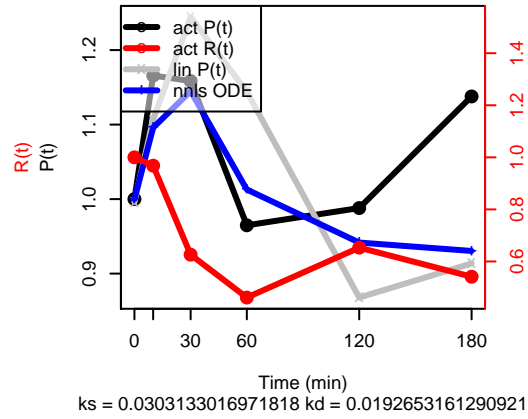

SPBC1734.04

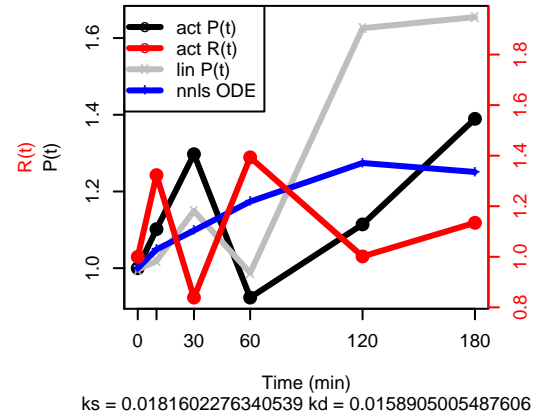

SPBC17G9.10

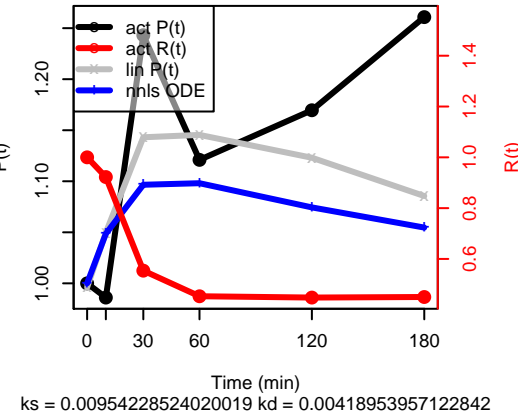

SPBC1A4.07c

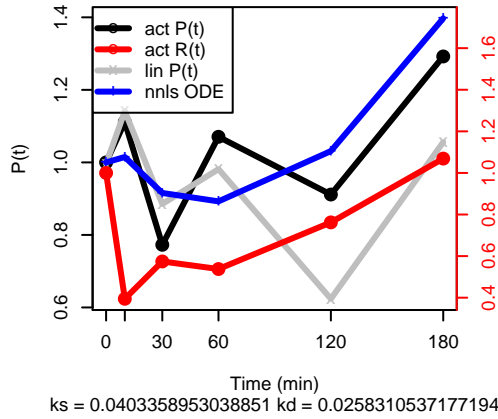

SPBC216.03

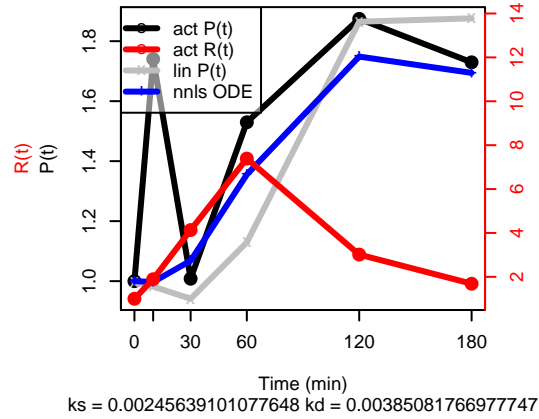

SPBC21B10.03c

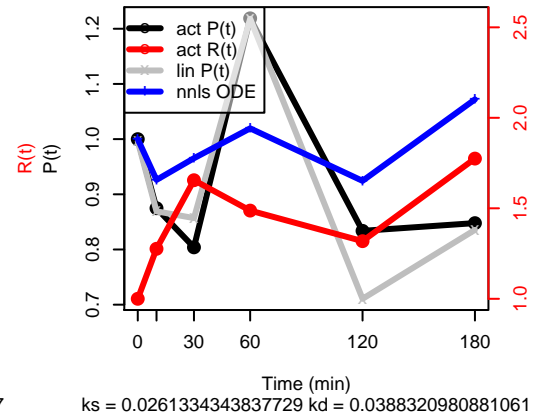

SPBC21C3.13

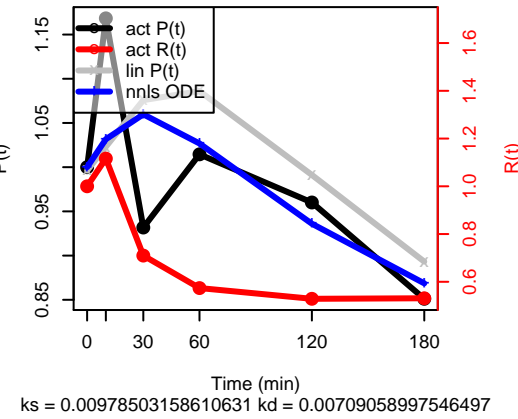

SPBC21D10.09c

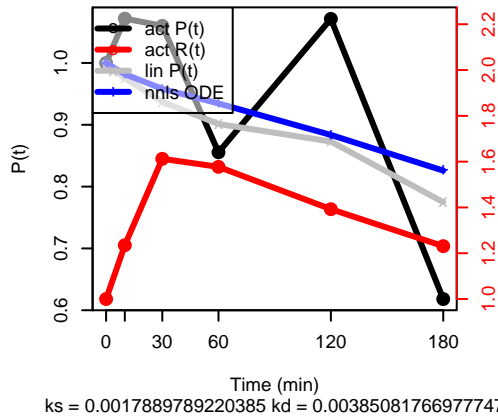

SPBC29A10.07

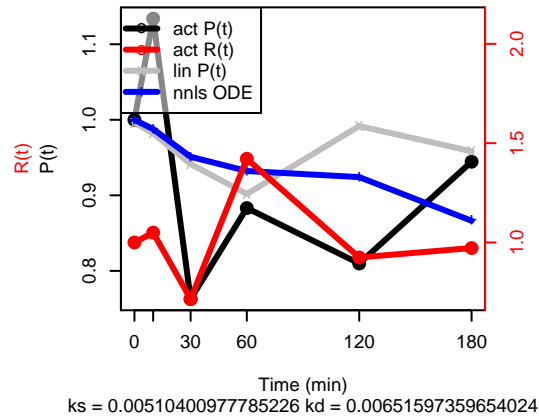

SPBC29A3.16

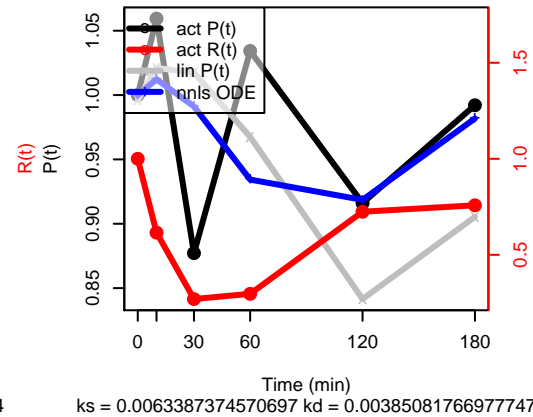

SPBC2F12.02c

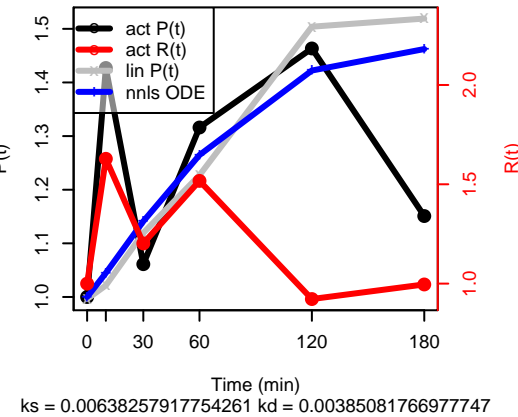

SPBC30D10.07c

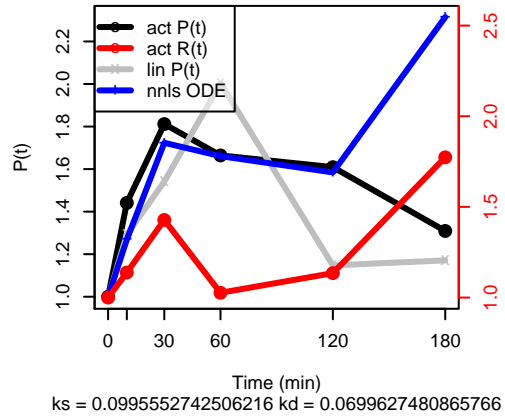

SPBC359.02

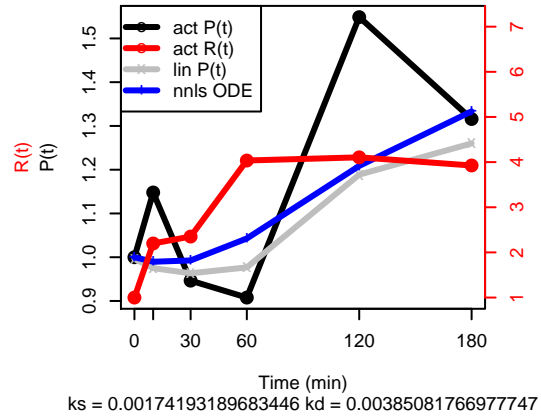

SPBC365.11

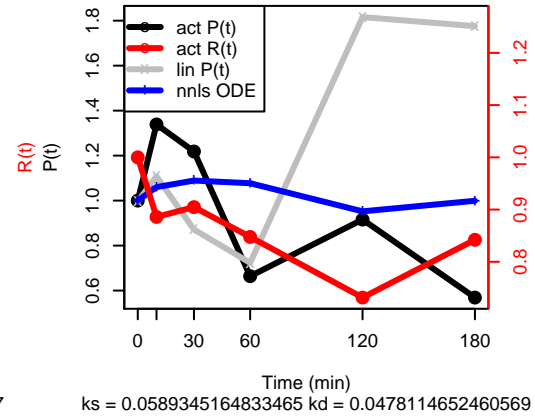

SPBC36B7.08c

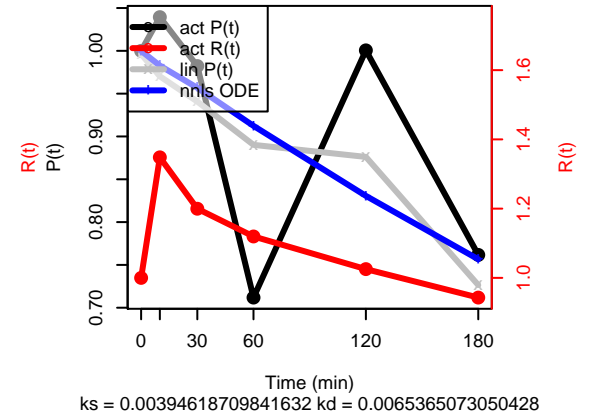

SPBC3B8.04c

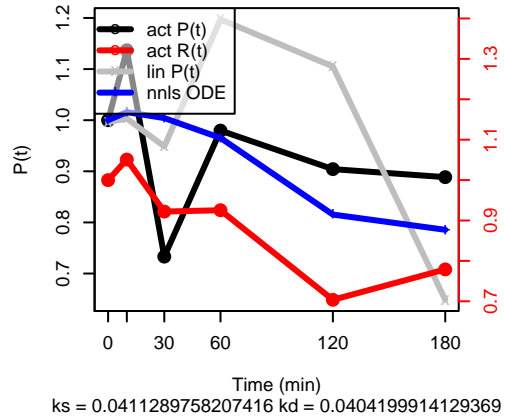

SPBC3B9.19

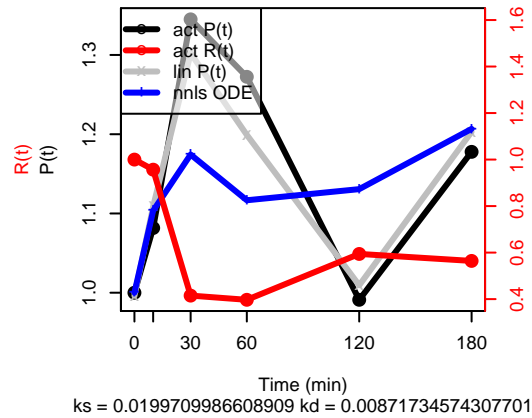

SPBC3E7.10

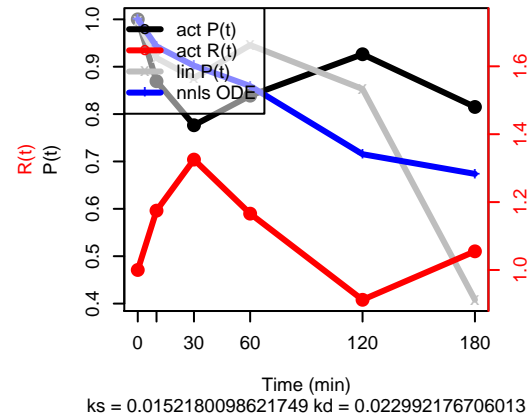

SPBC3F6.02c

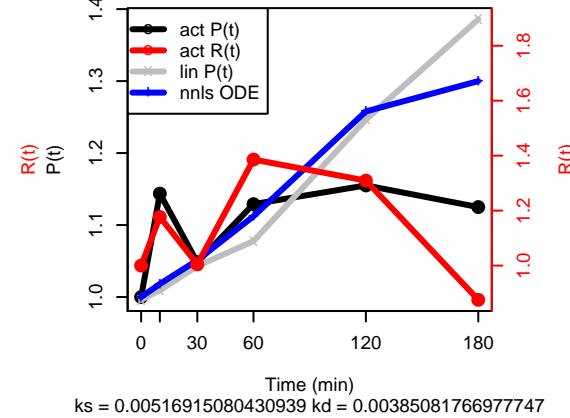

SPBC4C3.10c

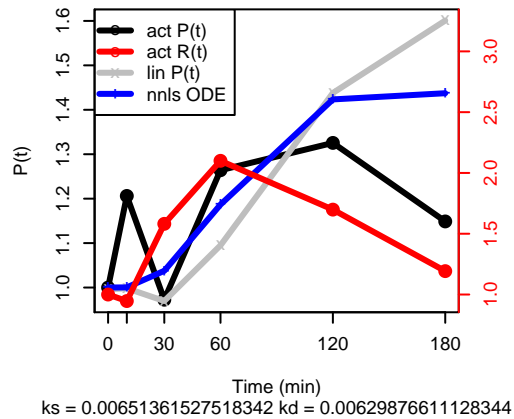

SPBC557.03c

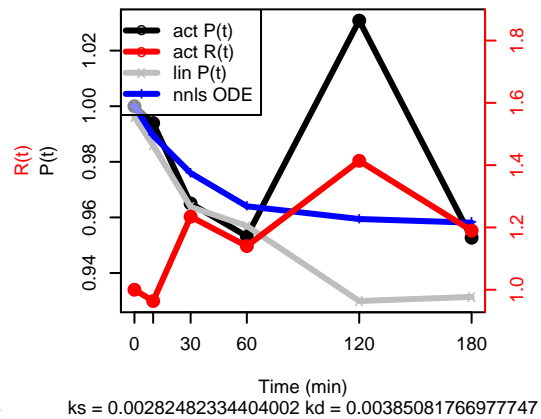

SPBC646.13

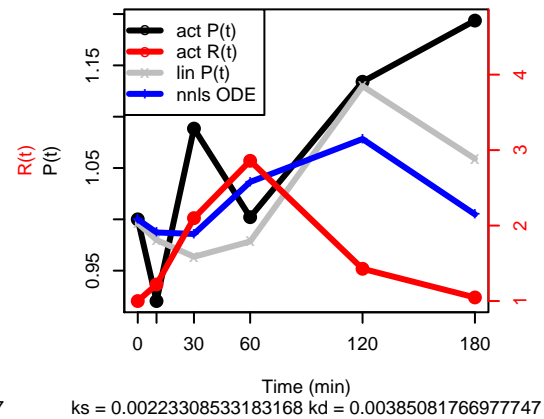

SPBC685.06

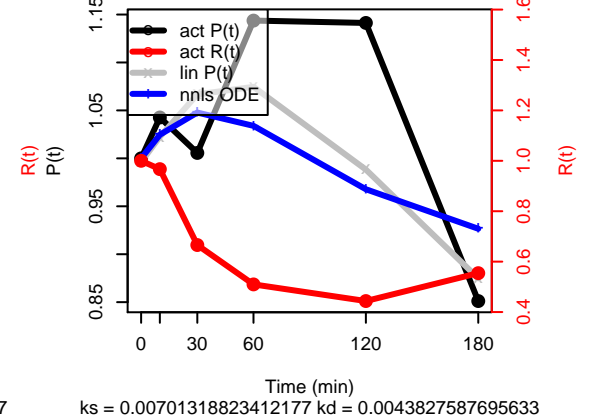

SPBC725.15

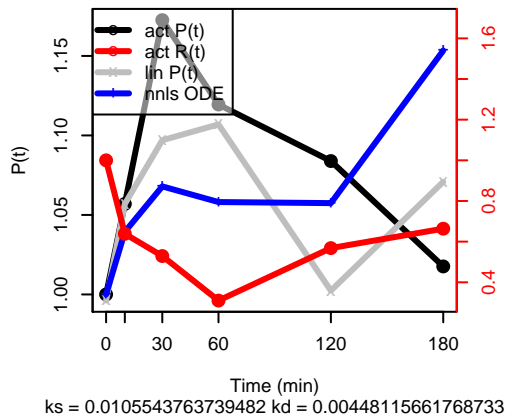

SPBC776.14

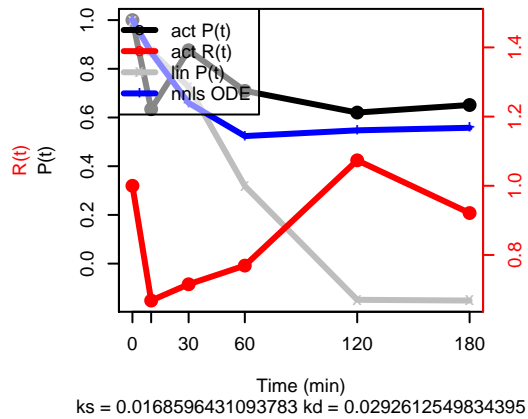

SPBC83.14c

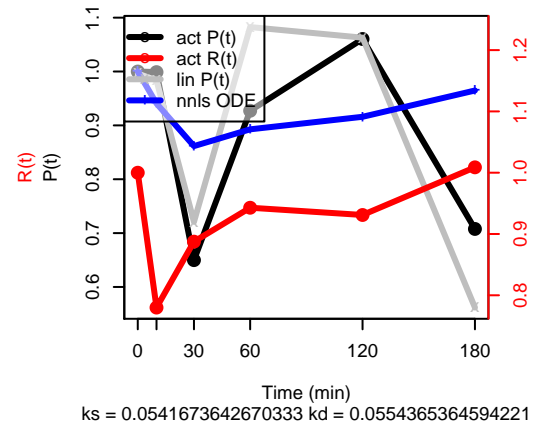

SPBP16F5.08c

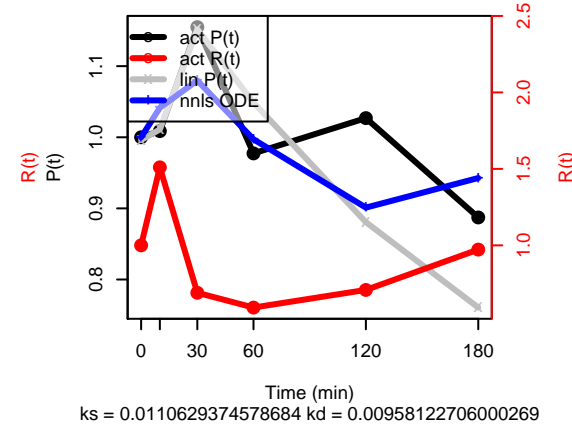

SPBP22H7.07

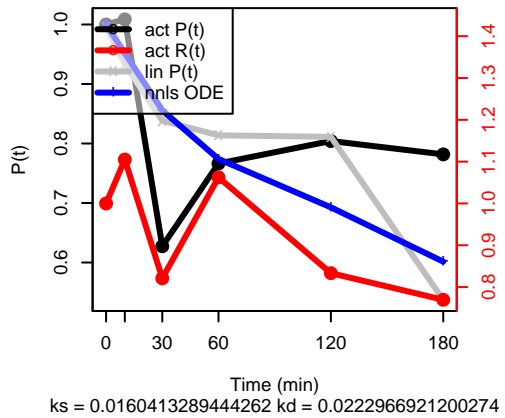

SPBP35G2.05c

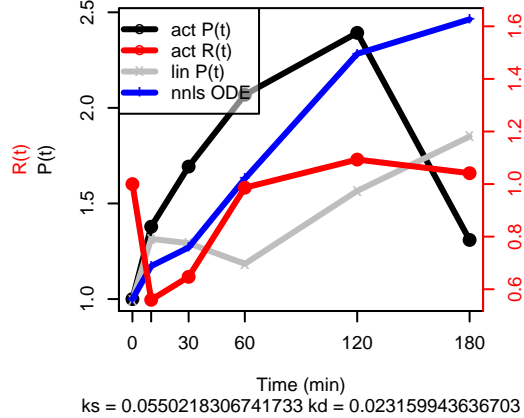

SPBP8B7.20c

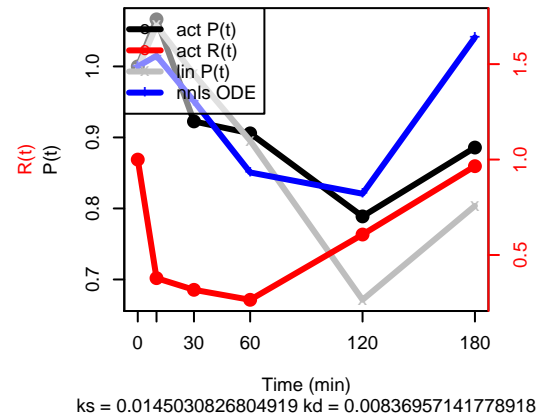

SPCC1223.14

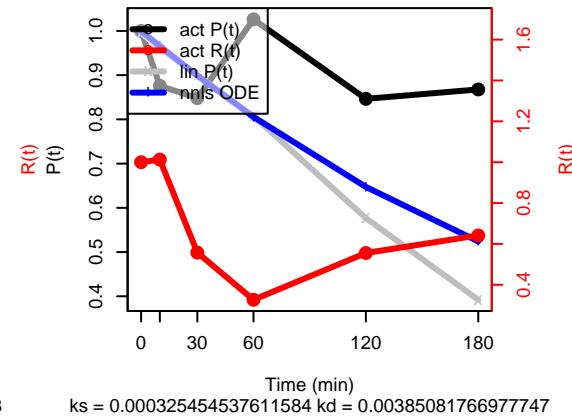

SPCC1235.11

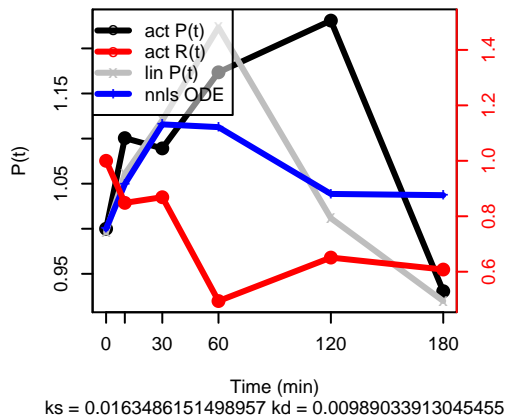

SPCC13B11.01

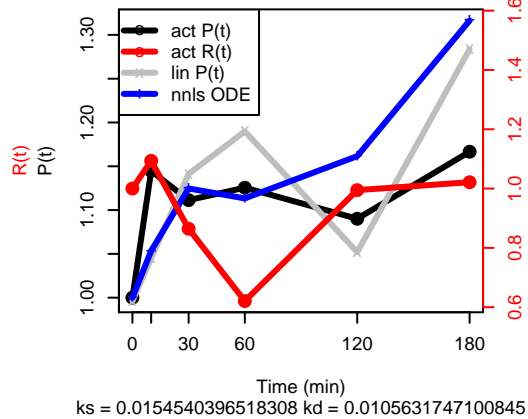

SPCC162.07

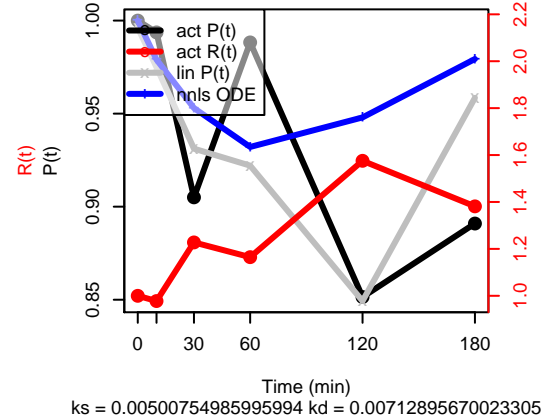

SPCC1682.12c

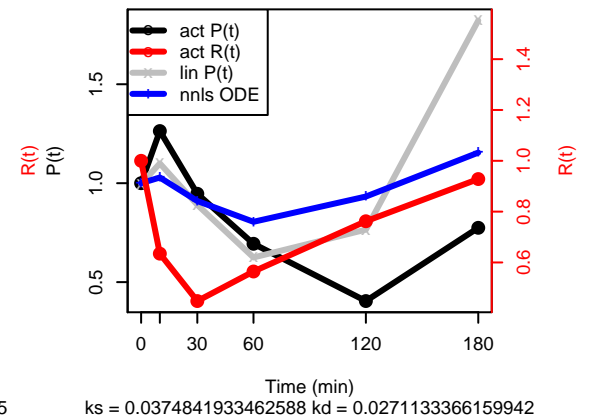

SPCC16A11.13

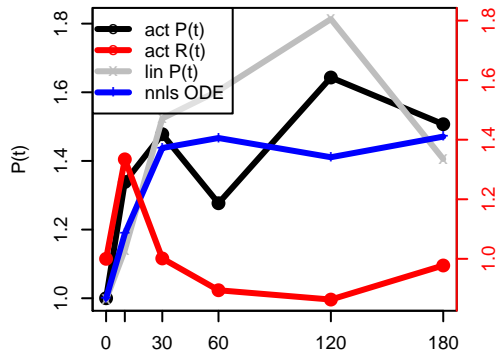

Time (min)  
ks = 0.0391419618448762 kd = 0.024697894672439

SPCC16A11.17

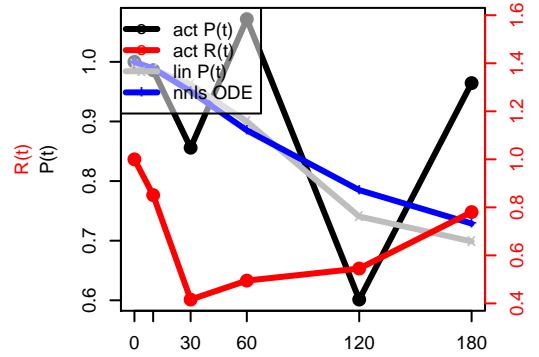

Time (min)  
ks = 0.00296796721115646 kd = 0.00385081766977747

SPCC16C4.07

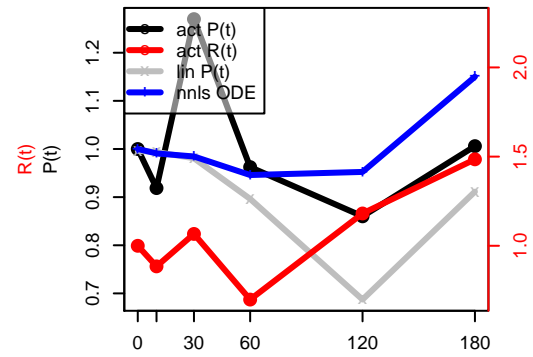

Time (min)  
ks = 0.0122997094645587 kd = 0.0125471769381332

SPCC16C4.18c

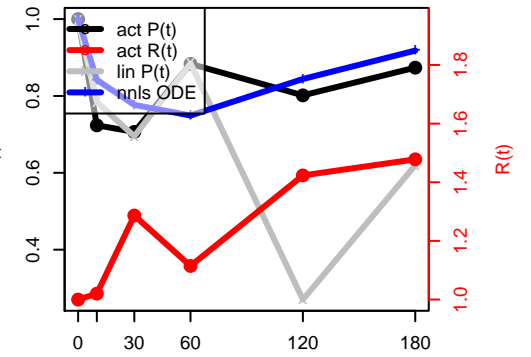

Time (min)  
ks = 0.0366965983411351 kd = 0.0578921719618888

SPCC1739.10

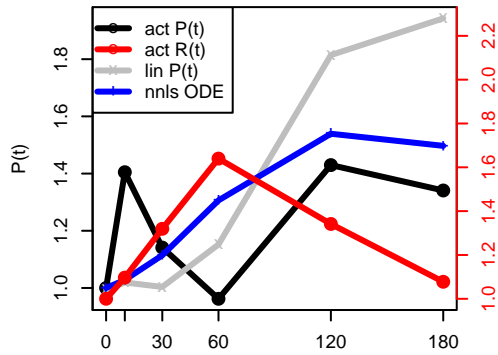

Time (min)  
ks = 0.013015643859998 kd = 0.0107135863680974

SPCC285.13c

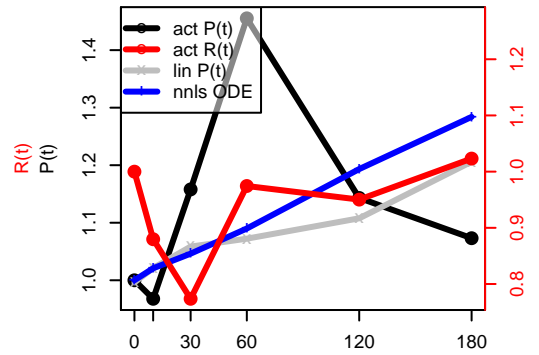

Time (min)  
ks = 0.00635651159535513 kd = 0.00385081766977747

SPCC306.03c

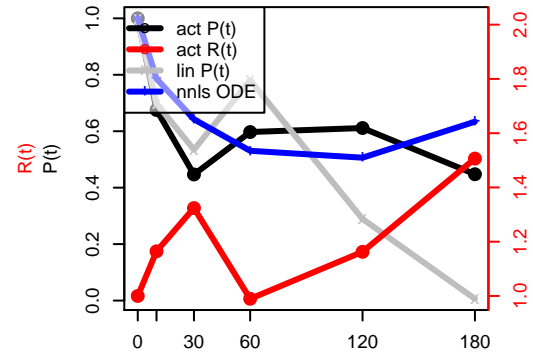

Time (min)  
ks = 0.0245523135593954 kd = 0.0544052111924761

SPCC584.01c

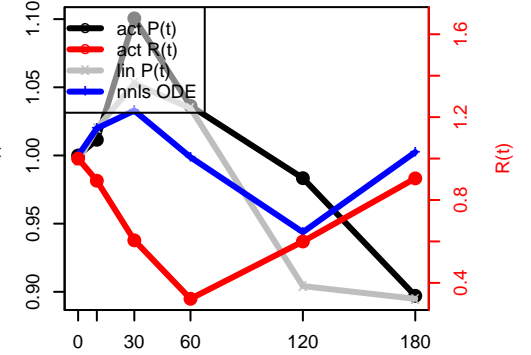

Time (min)  
ks = 0.00650932083479474 kd = 0.00412794662215581

SPCC5E4.07

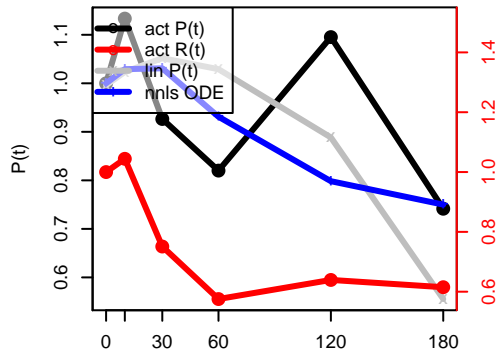

Time (min)  
ks = 0.0187283575905673 kd = 0.0160007502415774

SPCC622.18

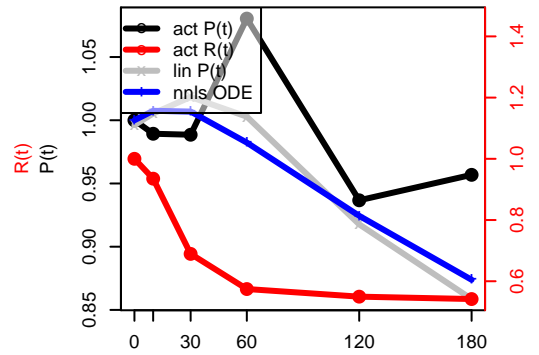

Time (min)  
ks = 0.00477085866454735 kd = 0.00385081766977747

SPCC757.10

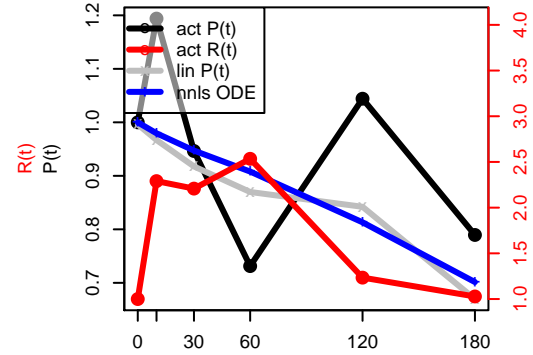

Time (min)  
ks = 0.000929490149642875 kd = 0.00385081766977747

SPCC794.11c

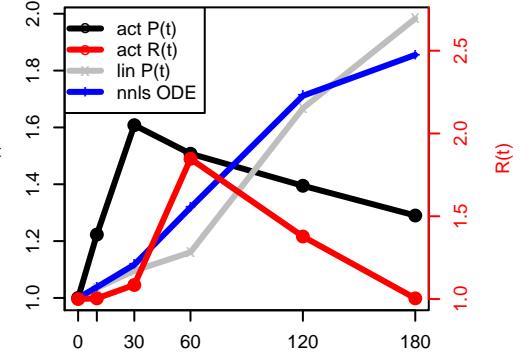

Time (min)  
ks = 0.00771446788004028 kd = 0.00385081766977747

SPCC830.10

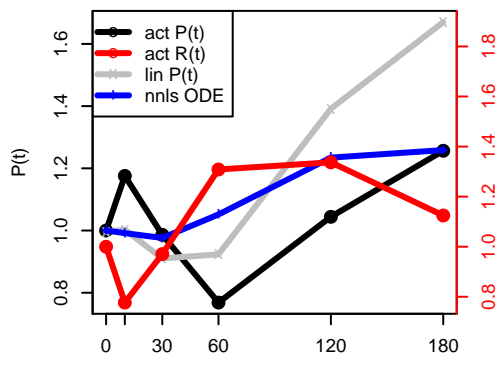

Time (min)  
ks = 0.0135151322859716 kd = 0.0128598731620478

SPCPB16A4.05c

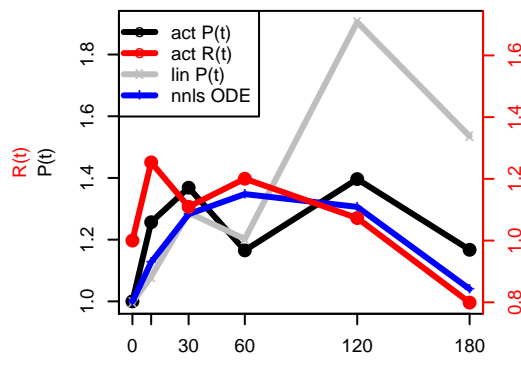

Time (min)  
ks = 0.055240303803793 kd = 0.046858354636098

SPAC12B10.06c

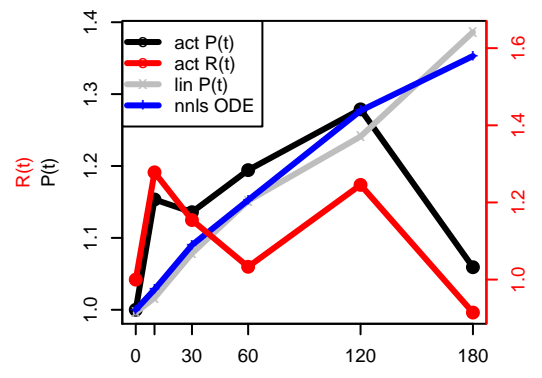

Time (min)  
ks = 0.00589644725389519 kd = 0.00385081766977747

SPAC12G12.07c

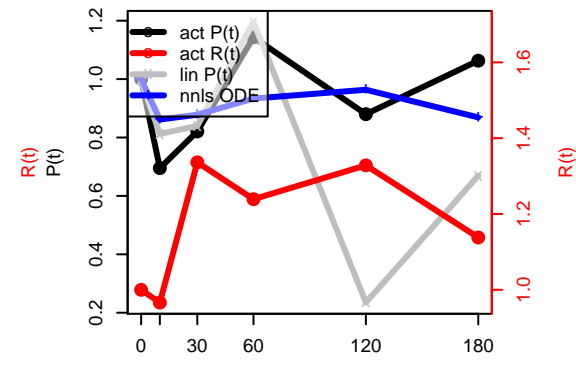

Time (min)  
ks = 0.052221498556931 kd = 0.070603663606161

SPAC16E8.15

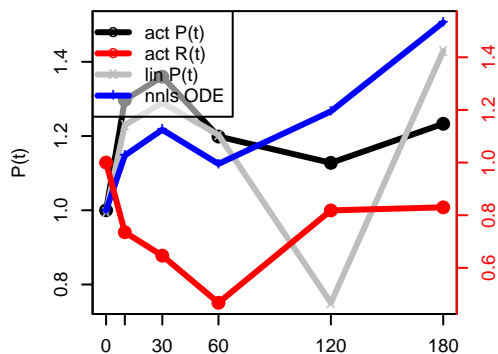

Time (min)  
ks = 0.048588857296967 kd = 0.0252266695931319

SPAC1805.17

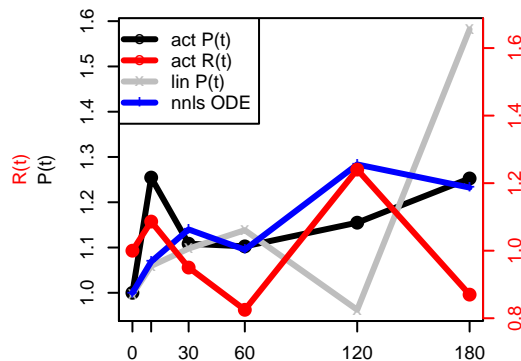

Time (min)  
ks = 0.0356166134466373 kd = 0.0293080093562312

SPAC19A8.07c

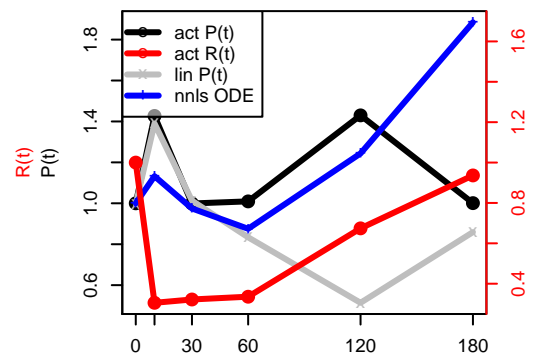

Time (min)  
ks = 0.0669520325843505 kd = 0.0275484488908791

SPAC222.12c

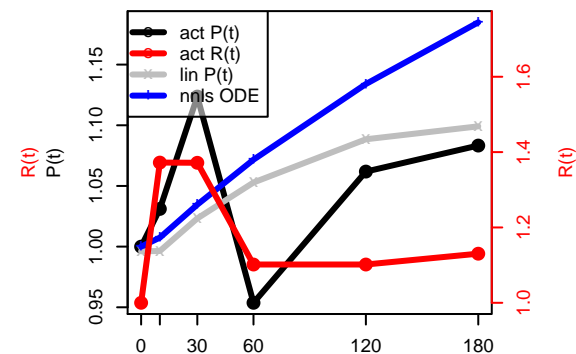

Time (min)  
ks = 0.00387297563272986 kd = 0.00385081766977747

SPAC22A12.14c

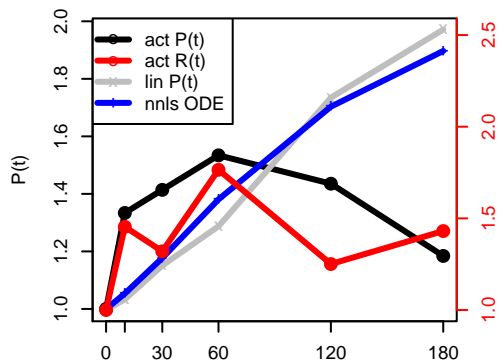

Time (min)  
ks = 0.00757120989537036 kd = 0.00385081766977747

SPAC23C4.09c

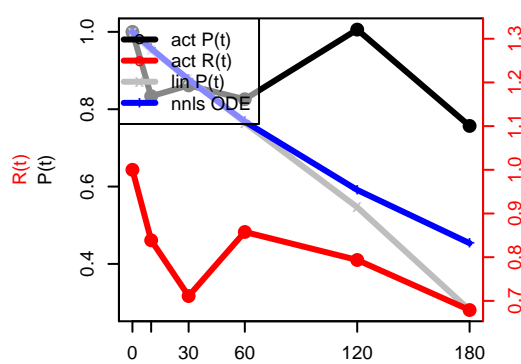

Time (min)  
ks = 0 kd = 0.00440472099189784

SPAC23G3.09

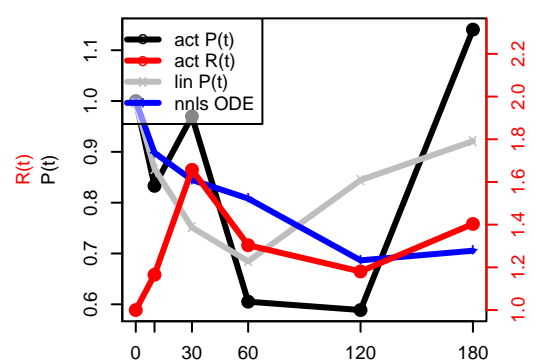

Time (min)  
ks = 0.0150100303987081 kd = 0.0279330546556021

SPAC23H3.13c

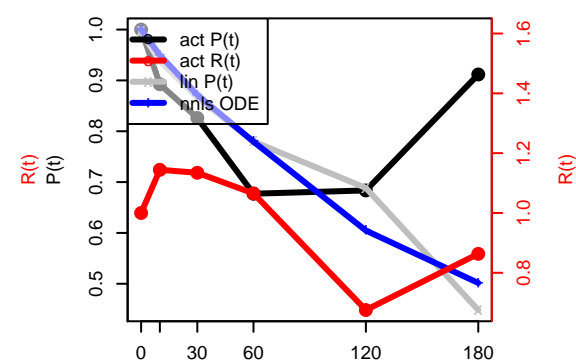

Time (min)  
ks = 0.0061561641590931 kd = 0.0119369070661154

SPAC24B11.11c

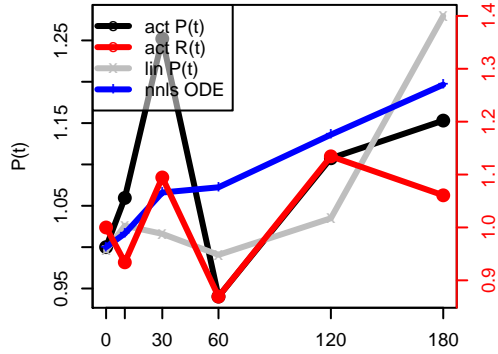

Time (min)  
ks = 0.029009988979751 kd = 0.0260370852740794

SPAC29B12.02c

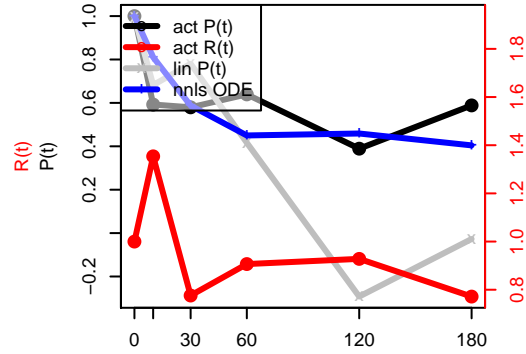

Time (min)  
ks = 0.0308699079587107 kd = 0.0622614253557846

SPAC2E12.02

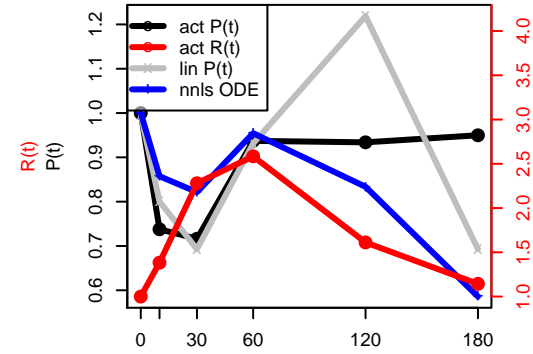

Time (min)  
ks = 0.014049565031919 kd = 0.0336315984369386

SPAC2F3.17c

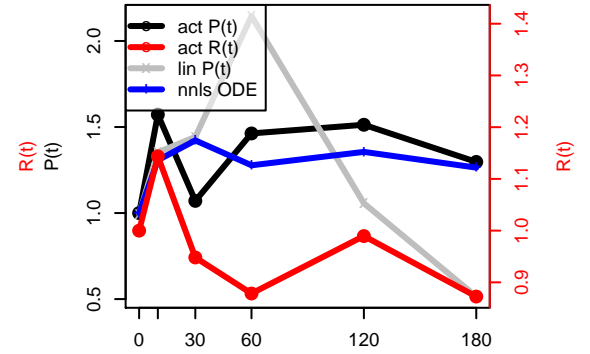

Time (min)  
ks = 0.120200987083518 kd = 0.084579772843965

SPAC31A2.03

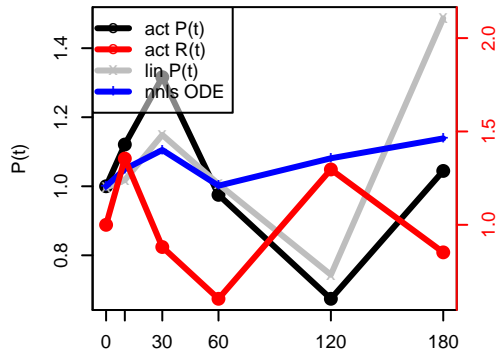

Time (min)  
ks = 0.0175255086593327 kd = 0.0153434865156615

SPAC343.14c

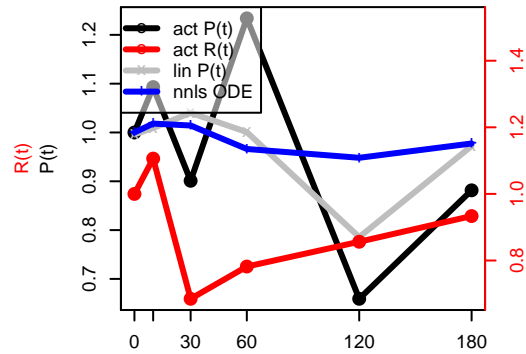

Time (min)  
ks = 0.0114535285064288 kd = 0.0101644239710359

SPAC3A12.07

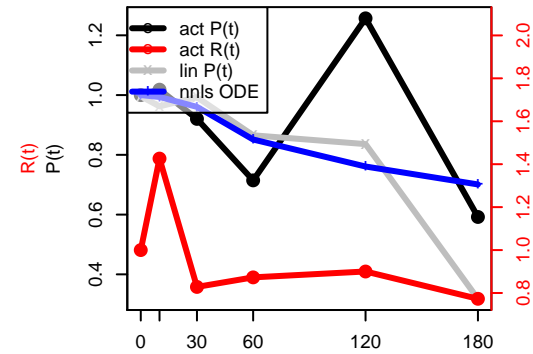

Time (min)  
ks = 0.0122258651615201 kd = 0.015621138535595

SPAC4G9.16c

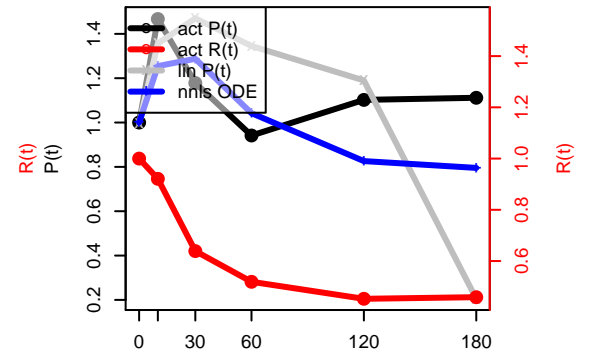

Time (min)  
ks = 0.086387426249133 kd = 0.0503632414696722

SPAC56F8.10

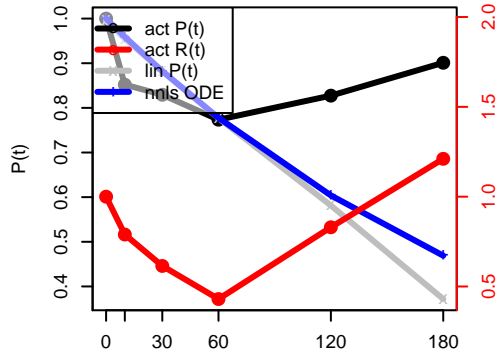

Time (min)  
ks = 0 kd = 0.00421940396447316

SPAC57A7.06

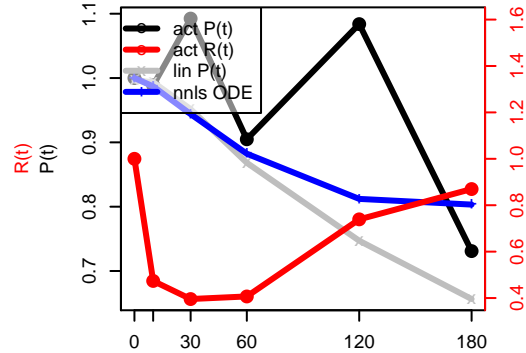

Time (min)  
ks = 0.00360249860223376 kd = 0.00385081766977747

SPAC589.09

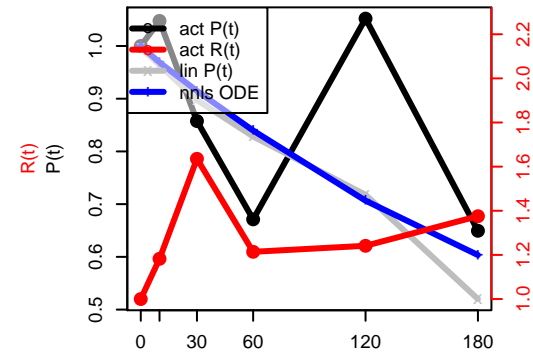

Time (min)  
ks = 0.000609689216740708 kd = 0.00385081766977747

SPAC630.03

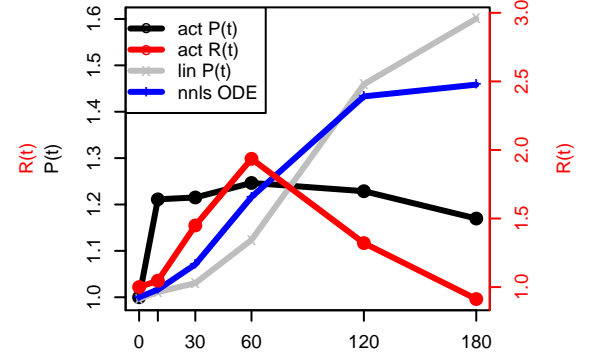

Time (min)  
ks = 0.00537000596456282 kd = 0.00385081766977747

SPAC631.01c

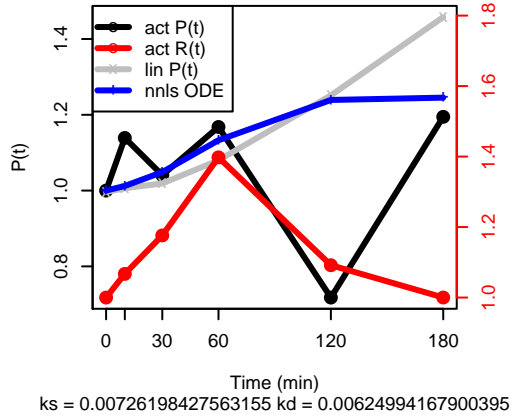

SPAC637.13c

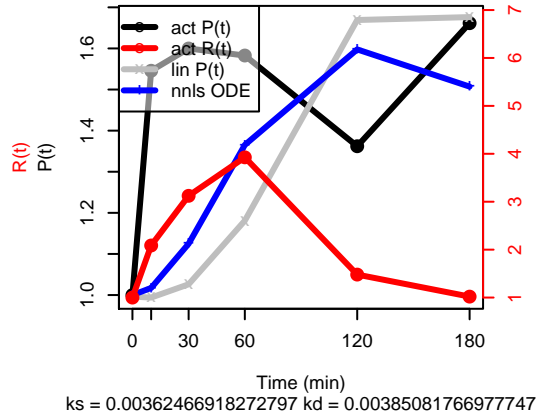

SPAC664.08c

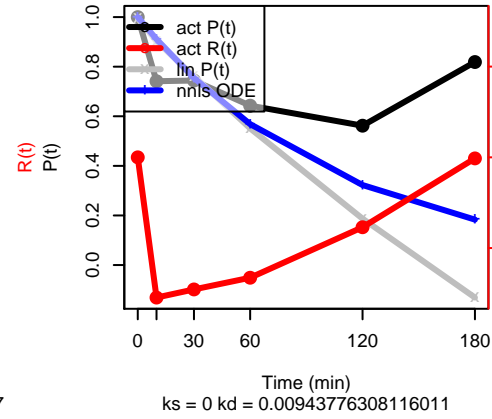

SPAC664.11

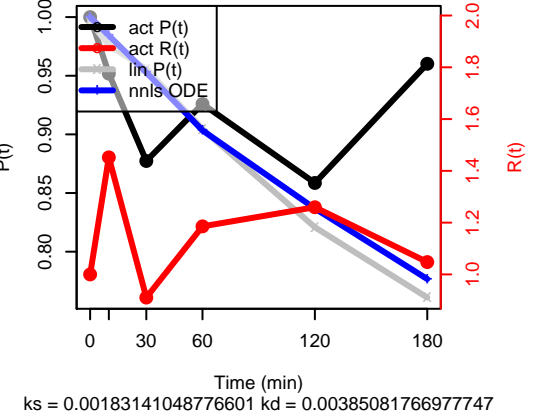

SPAC9.09

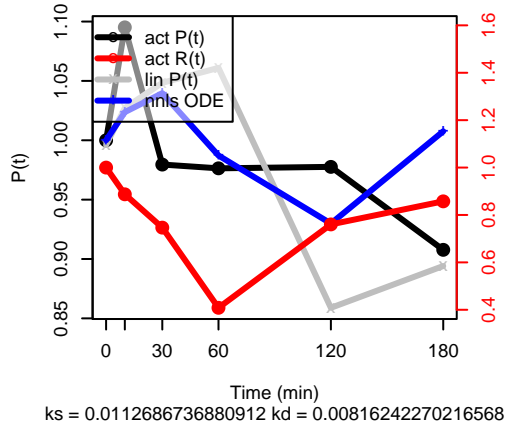

SPAC959.07

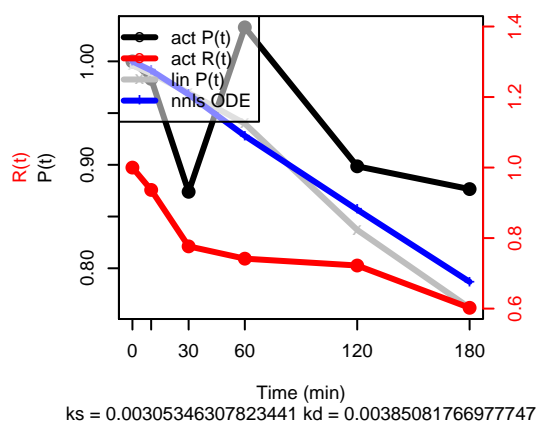

SPAPB2B4.02

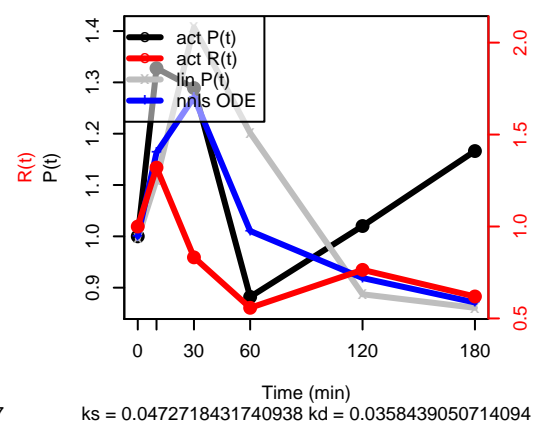

SPAPJ698.02c

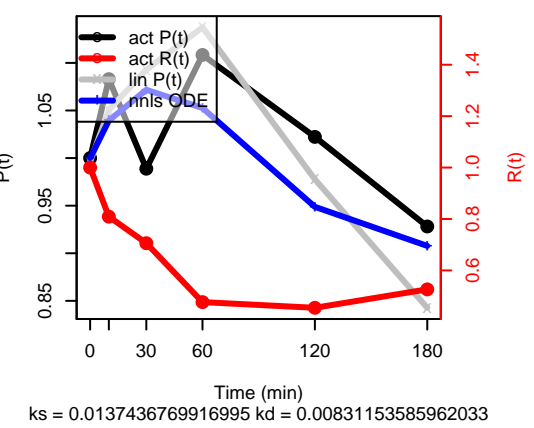

SPBC115.01c

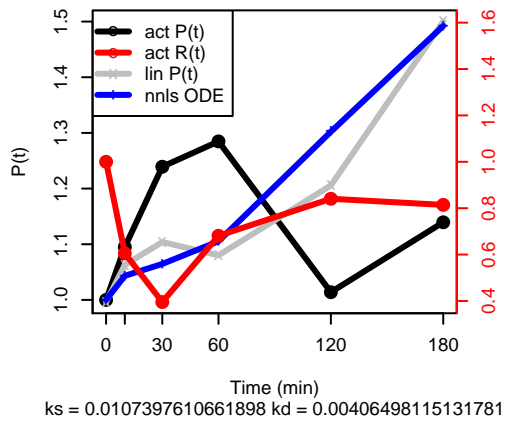

SPBC11B10.09

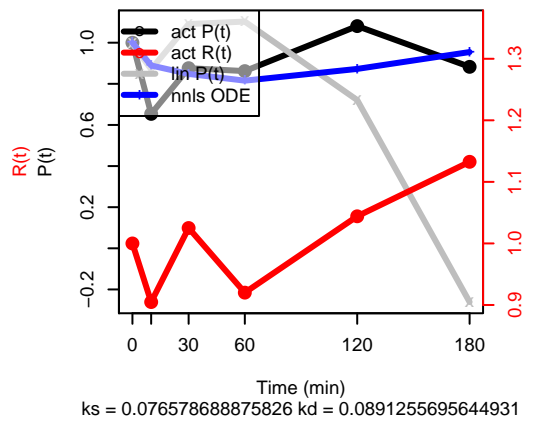

SPBC11C11.07

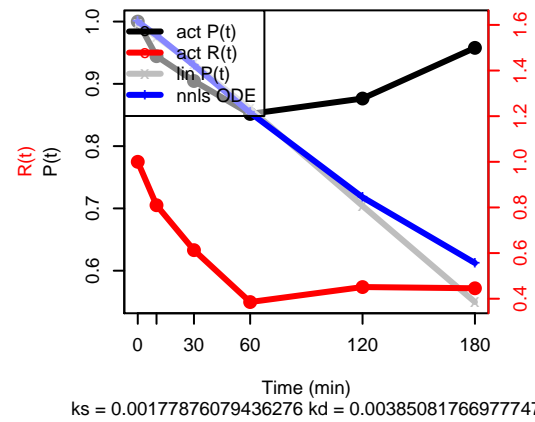

SPBC11C11.10

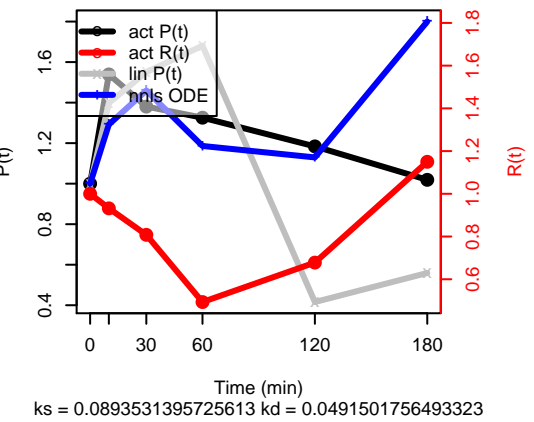



SPBC1347.02

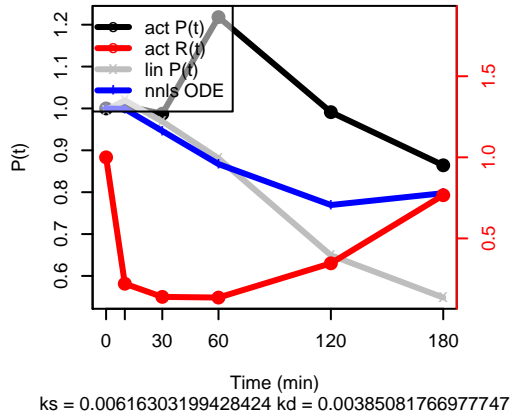

SPBC146.07

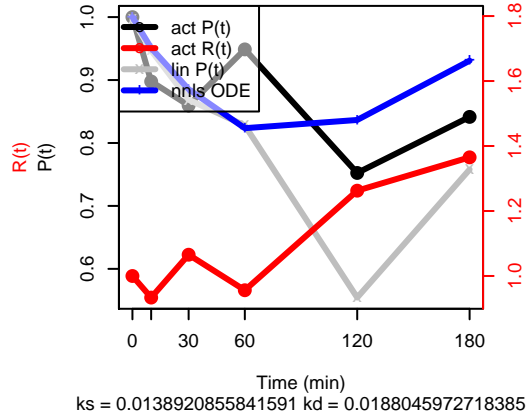

SPBC14C8.06

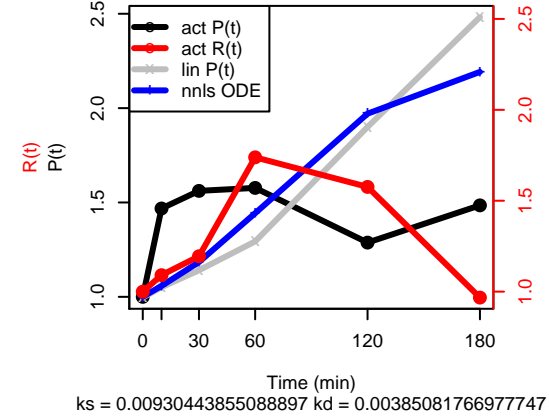

SPBC14C8.12

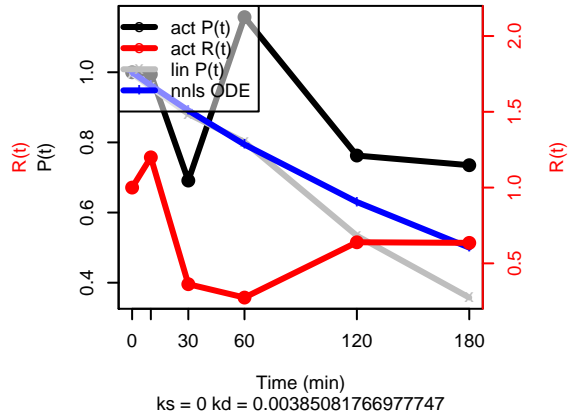

SPBC16A3.08c

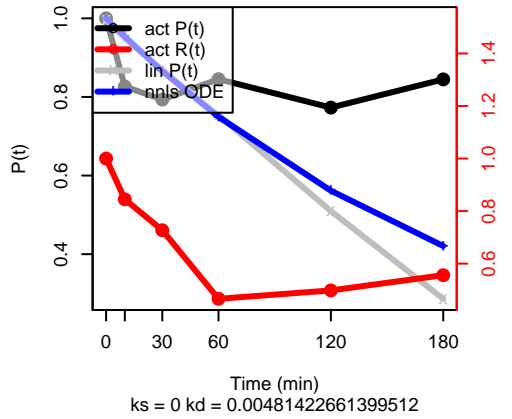

SPBC16G5.11c

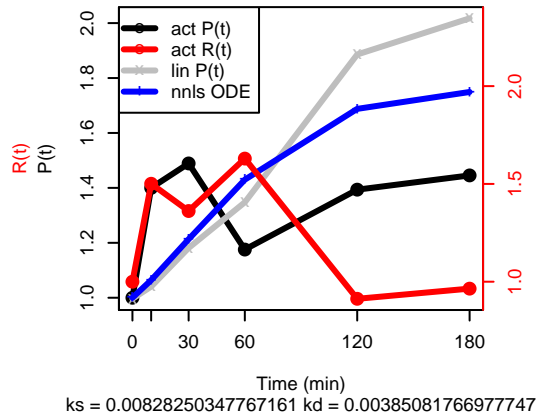

SPBC16H5.07c

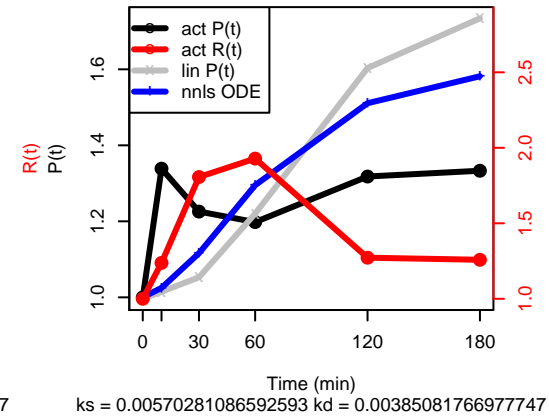

SPBC1711.04

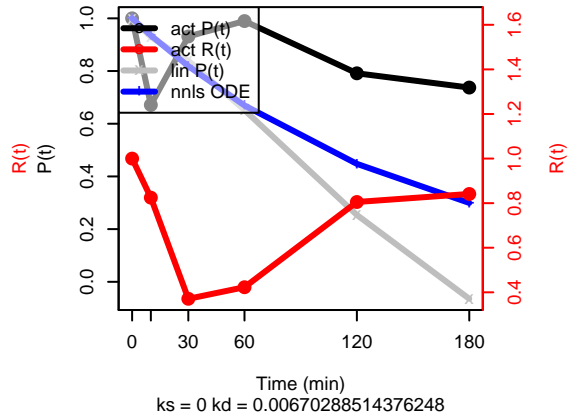

SPBC1711.12

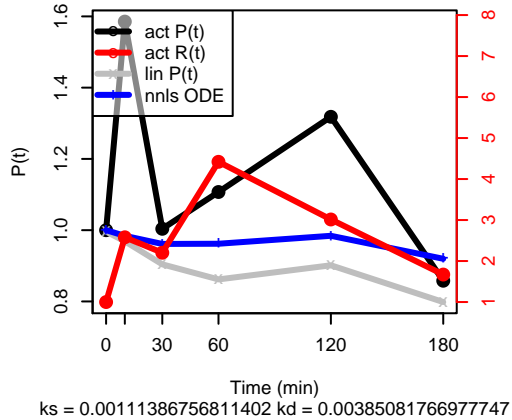

SPBC1734.16c

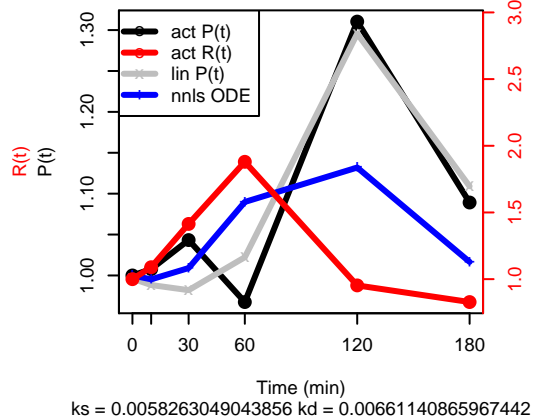

SPBC17A3.08

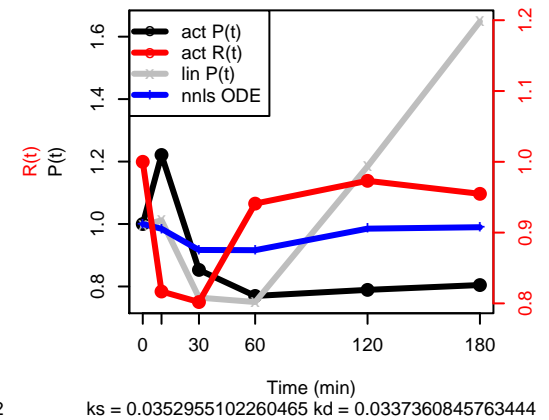

SPBC17D1.02

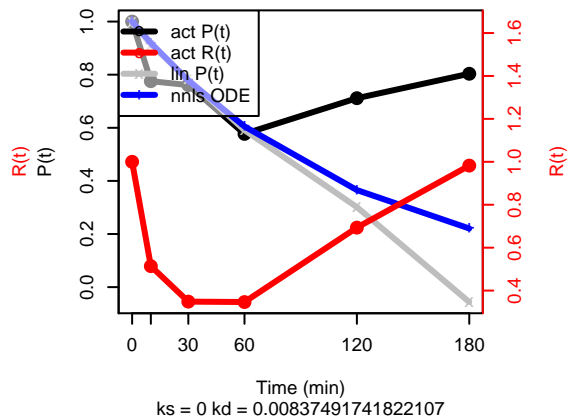

SPBC17G9.09

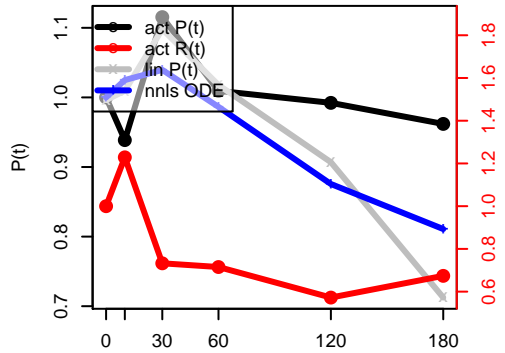

Time (min)  
ks = 0.0108962437534935 kd = 0.00955169057736893

SPBC19C2.07

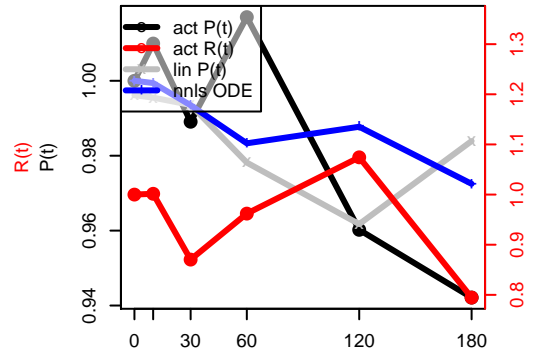

Time (min)  
ks = 0.00378612471988857 kd = 0.00385081766977747

SPBC21C3.05

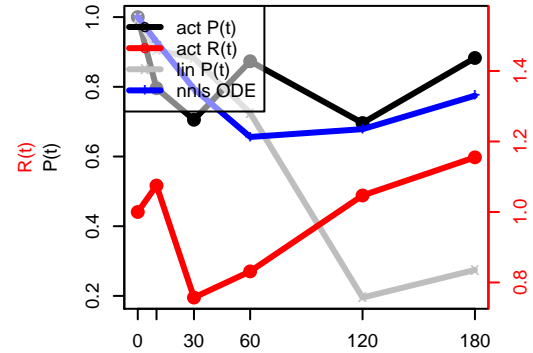

Time (min)  
ks = 0.0217511718511498 kd = 0.0308131483482111

SPBC23E6.04c

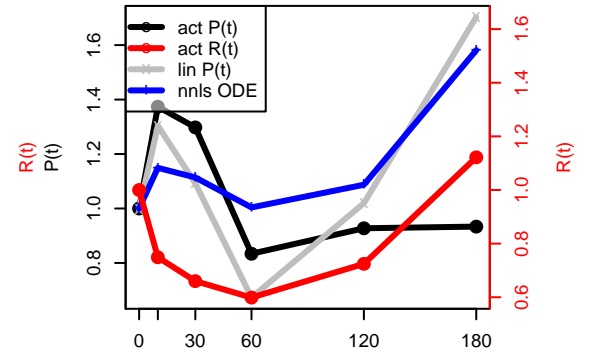

Time (min)  
ks = 0.0845594681455546 kd = 0.0537913785504999

SPBC244.02c

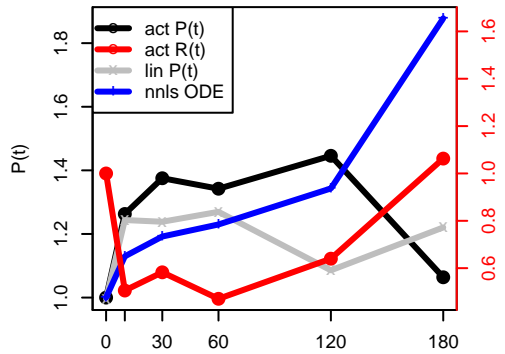

Time (min)  
ks = 0.0416442319447886 kd = 0.0168846299072243

SPBC2D10.14c

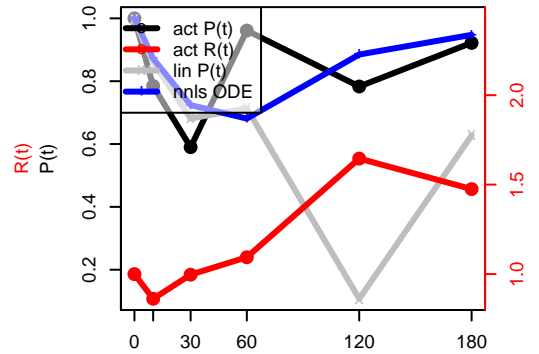

Time (min)  
ks = 0.0224075209390855 kd = 0.0360194153147696

SPBC365.13c

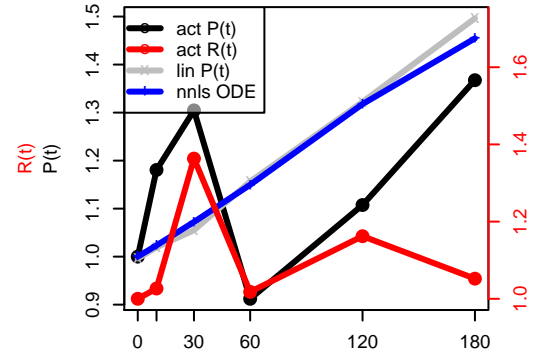

Time (min)  
ks = 0.0061655026599008 kd = 0.00385081766977747

SPBC3E7.16c

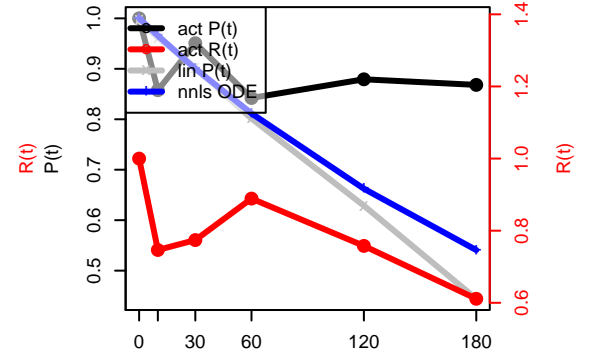

Time (min)  
ks = 0.000409411180715627 kd = 0.00385081766977747

SPBC4.05

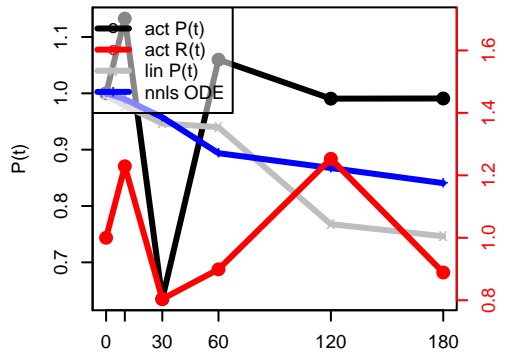

Time (min)  
ks = 0.00562239381619525 kd = 0.00747356138163843

SPBC409.05

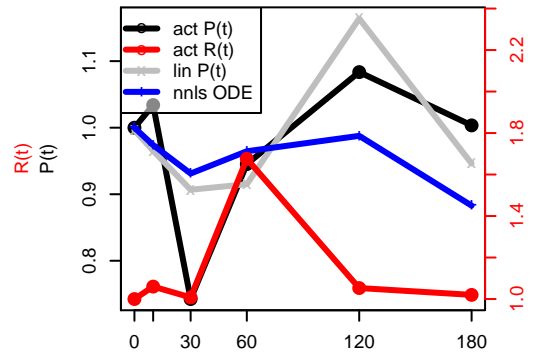

Time (min)  
ks = 0.00966073258819552 kd = 0.012738584299293

SPBC646.05c

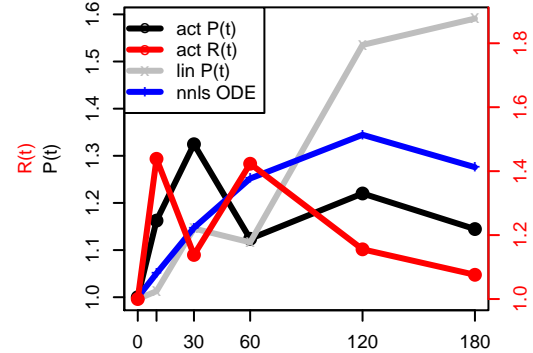

Time (min)  
ks = 0.0170584326831949 kd = 0.0153919658818844

SPBC646.10c

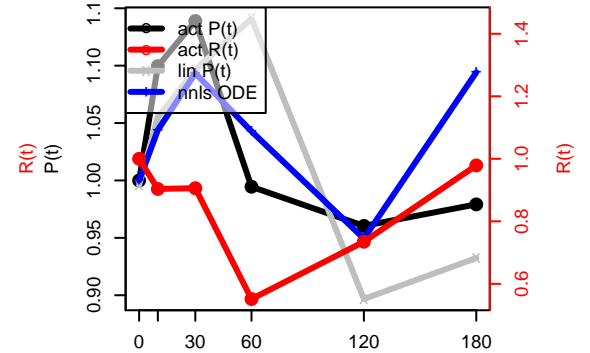

Time (min)  
ks = 0.0223848581536294 kd = 0.0165042494786023

SPBC776.09

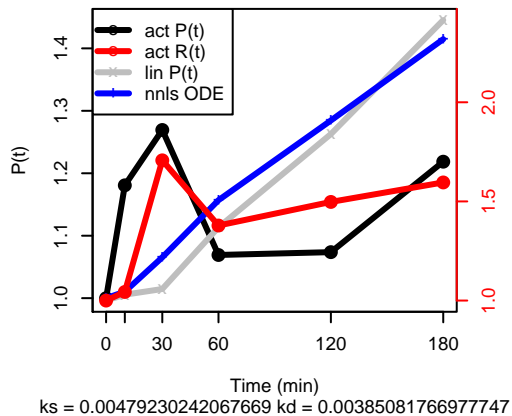

SPBC800.10c

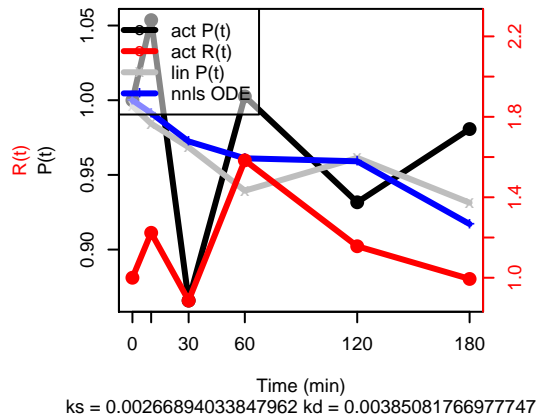

SPBC839.07

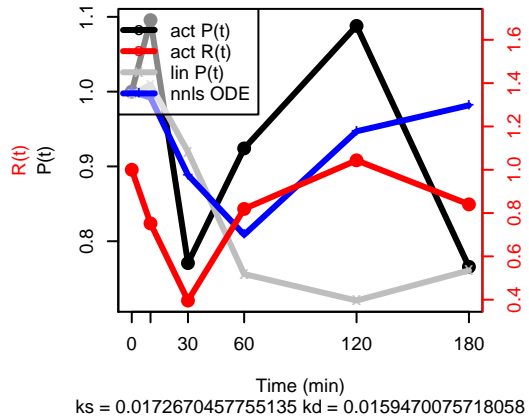

SPBP8B7.16c

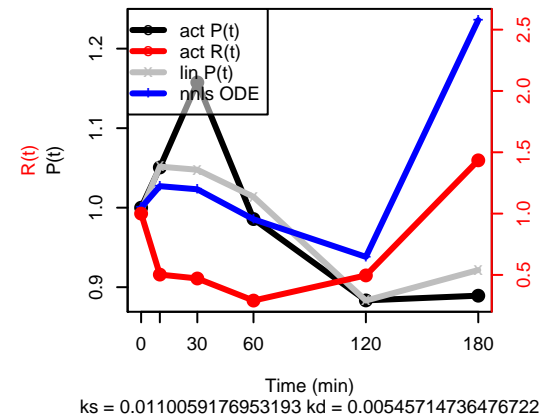

SPCC1223.07c

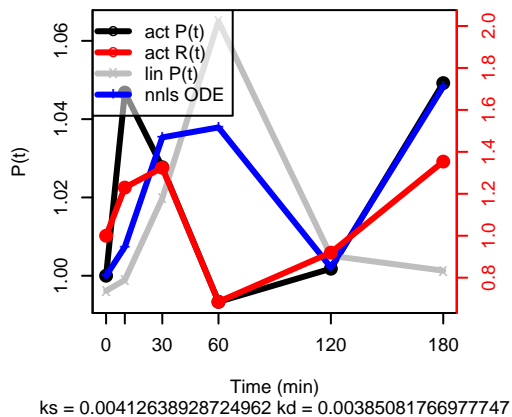

SPCC1235.06

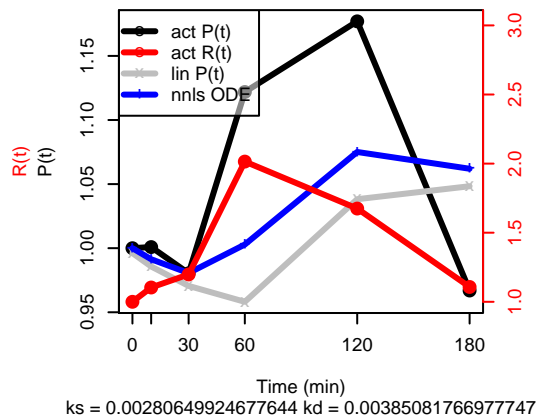

SPCC1322.09

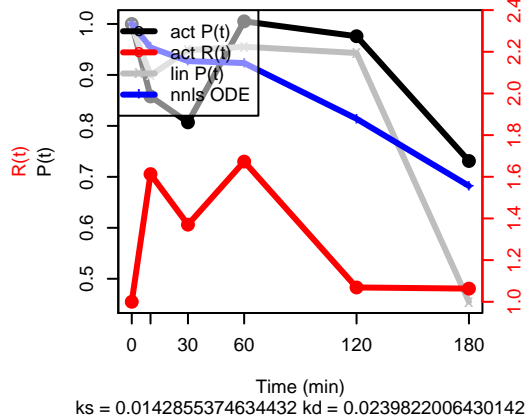

SPCC1442.09

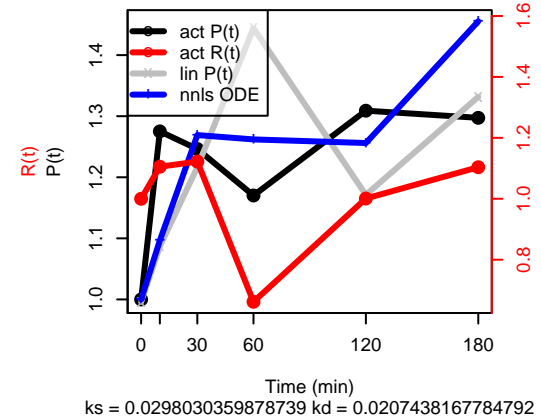

SPCC162.08c

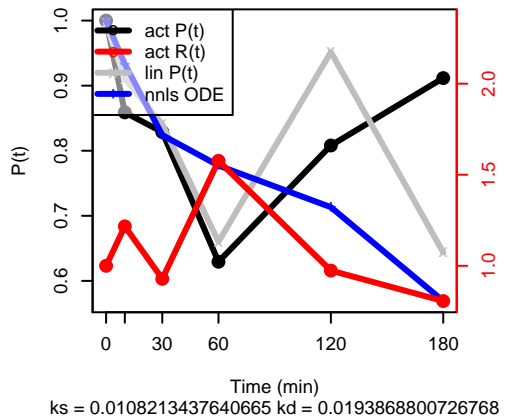

SPCC1620.06c

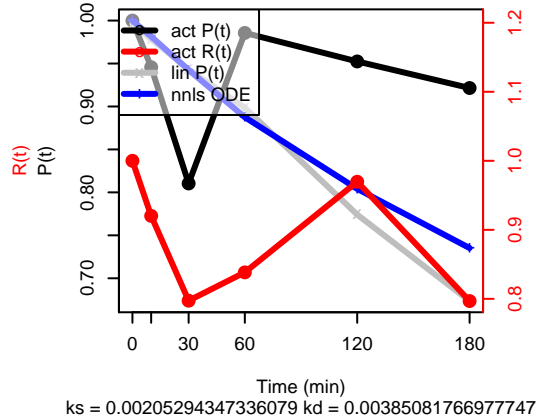

SPCC1672.01

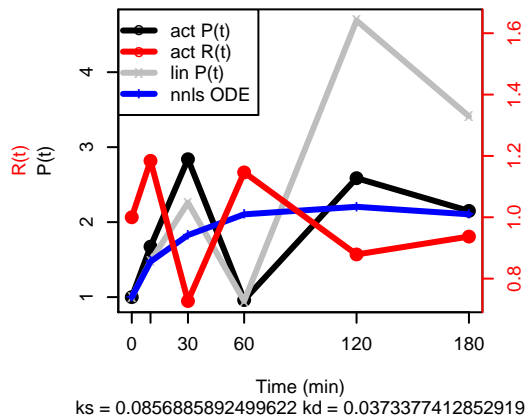

SPCC18.03

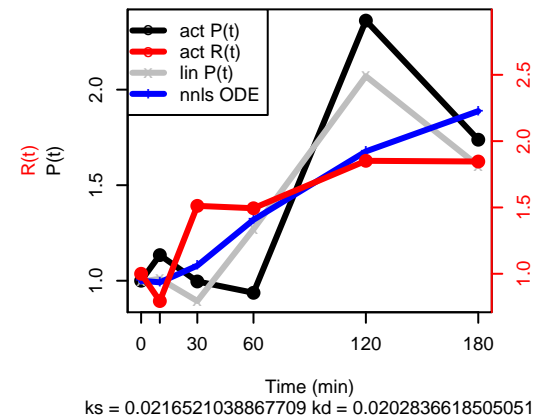

SPCC18.18c

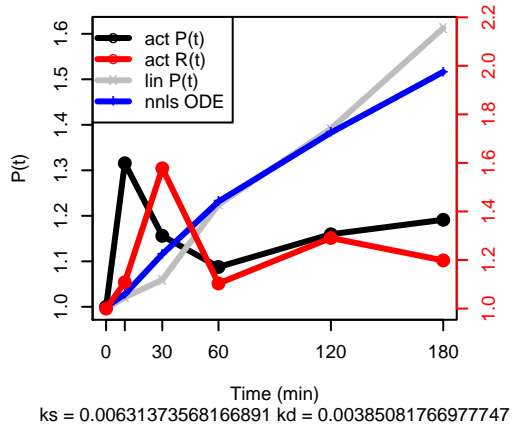

SPCC285.08

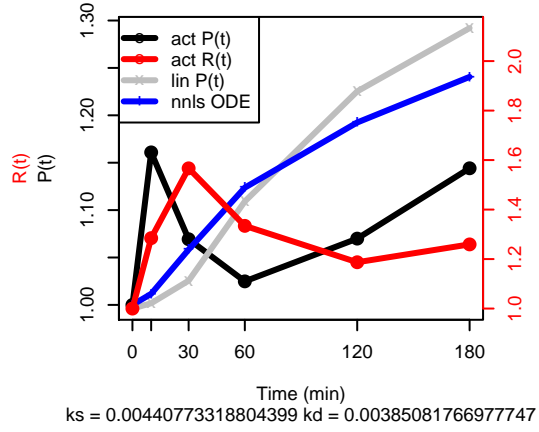

SPCC330.13

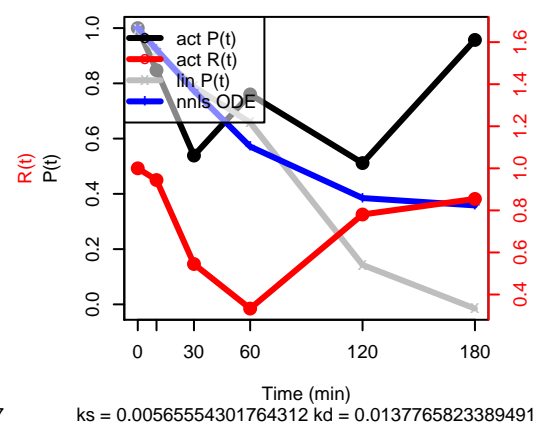

SPCC4B3.07

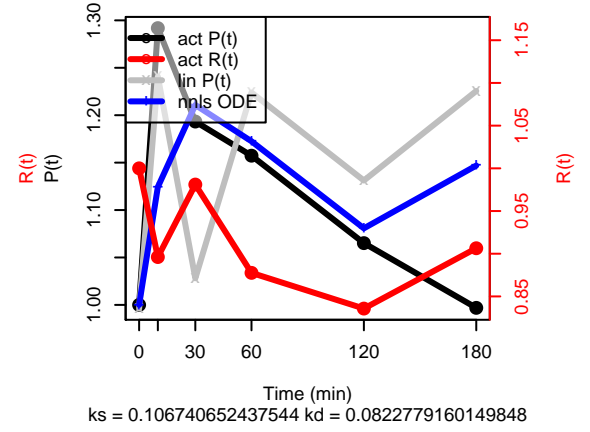

SPCC4G3.02

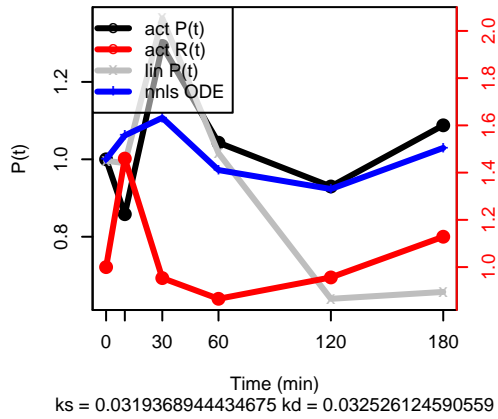

SPCC576.14

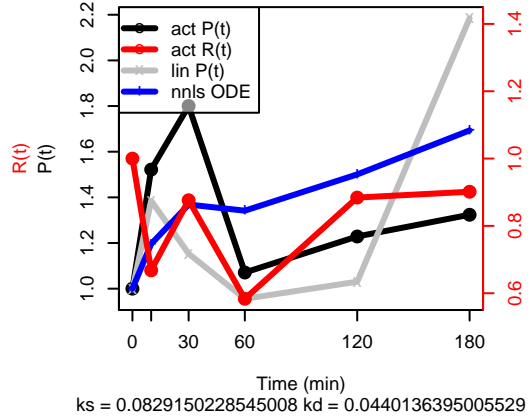

SPCC613.05c

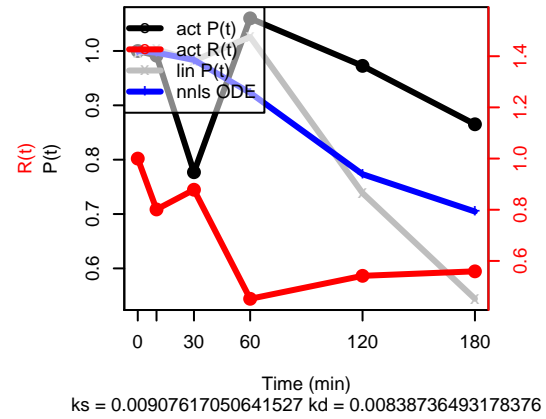

SPCC622.12c

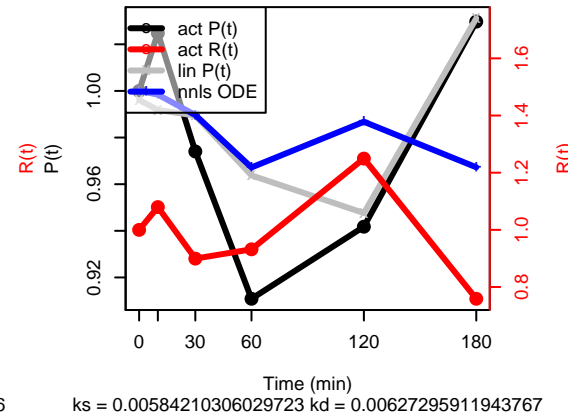

SPCC895.03c

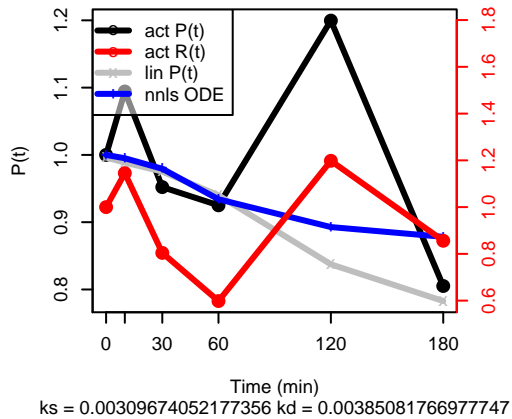

SPAC1002.18

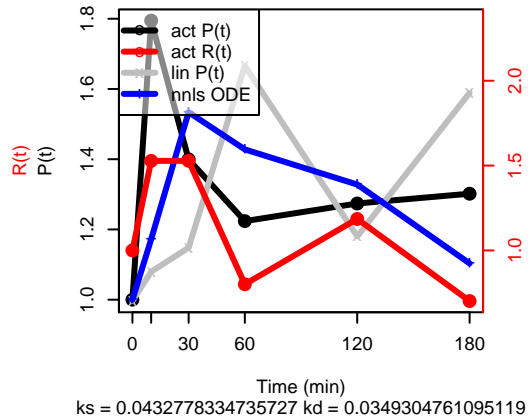

SPAC13G7.12c

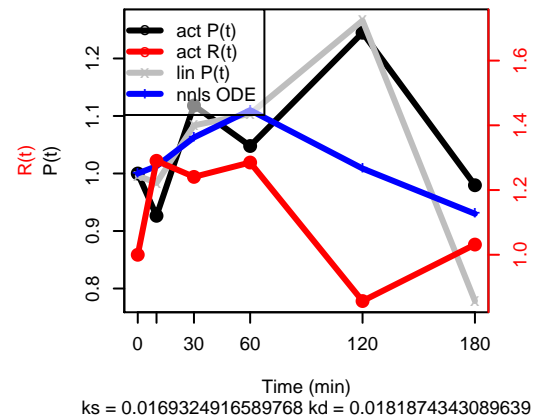

SPAC1565.01

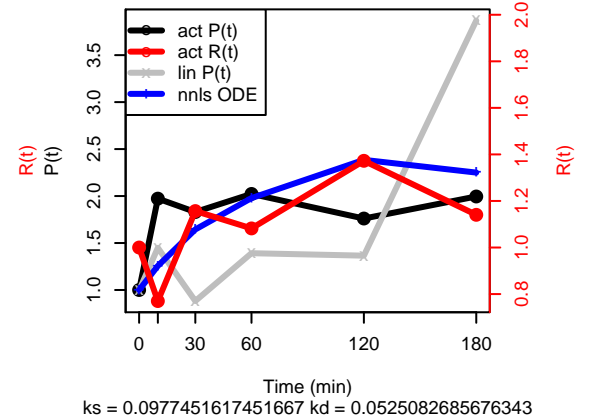

SPAC1782.05

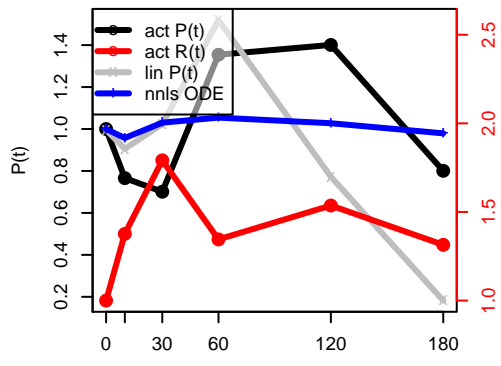

Time (min)  
ks = 0.0209809918807977 kd = 0.0300324899290891

SPAC17A2.13c

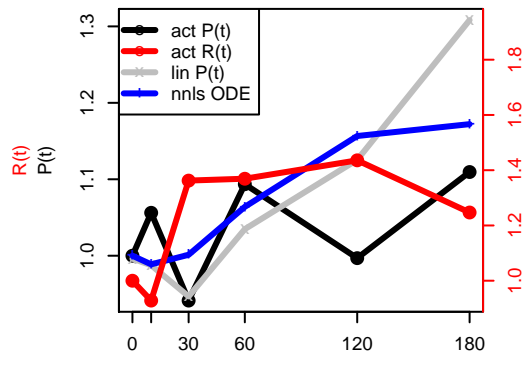

Time (min)  
ks = 0.00888772164186155 kd = 0.00974558467701703

SPAC19B12.13

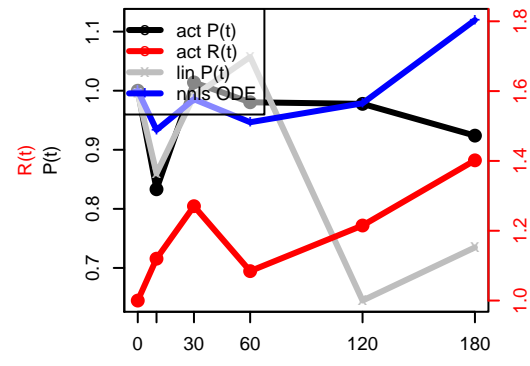

Time (min)  
ks = 0.0625079863760382 kd = 0.0761435999185472

SPAC19G12.05

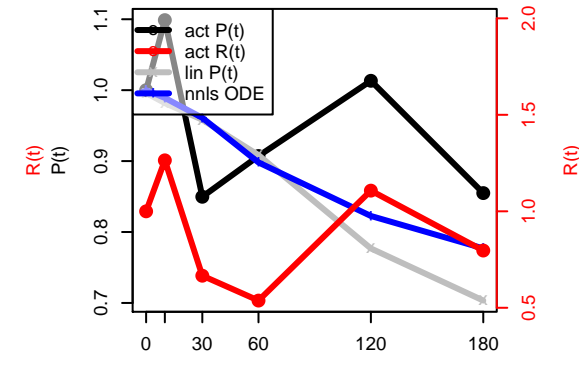

Time (min)  
ks = 0.00241773715865506 kd = 0.00385081766977747

SPAC1D4.04

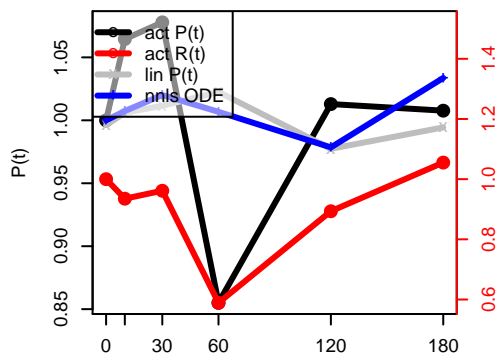

Time (min)  
ks = 0.00600314540642819 kd = 0.00501576941807034

SPAC20H4.03c

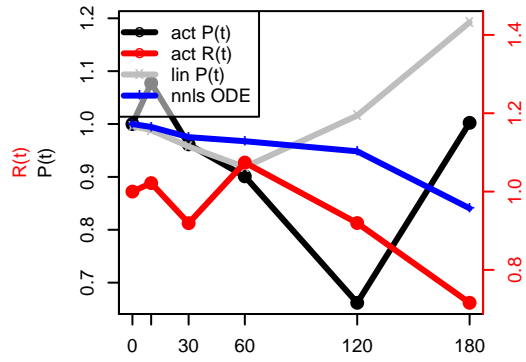

Time (min)  
ks = 0.0133513725761015 kd = 0.0141110599051403

SPAC21E11.06

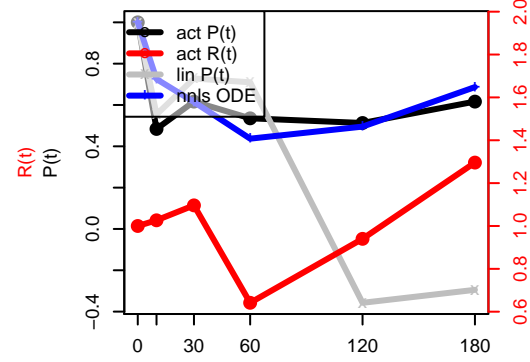

Time (min)  
ks = 0.0555289750634674 kd = 0.0997438007443664

SPAC23D3.02

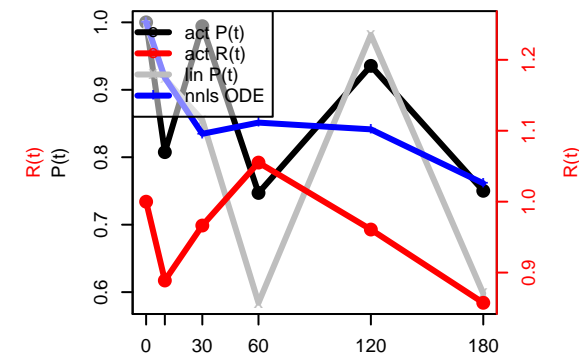

Time (min)  
ks = 0.040726940411316 kd = 0.0486578089506921

SPAC2G11.03c

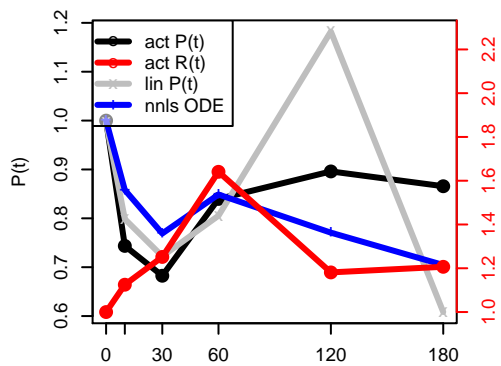

Time (min)  
ks = 0.0285506942614641 kd = 0.0483114220450406

SPAC30D11.04c

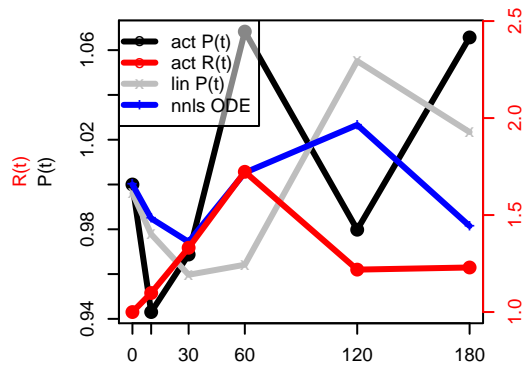

Time (min)  
ks = 0.00530770434209789 kd = 0.00714127202114235

SPAC3G6.06c

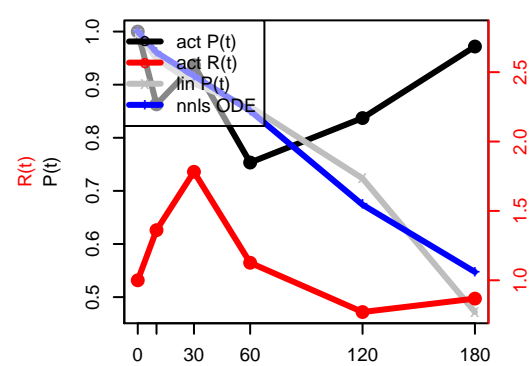

Time (min)  
ks = 0.00352183203165003 kd = 0.00825322241008013

SPAC3G6.09c

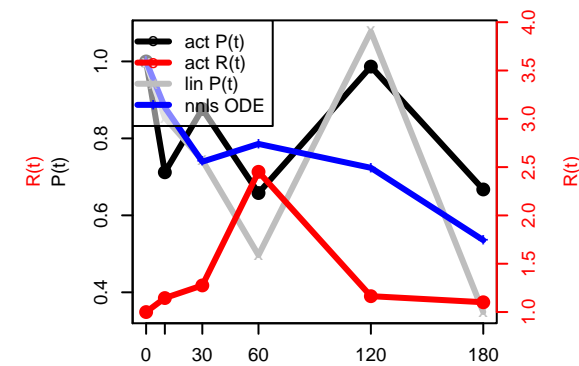

Time (min)  
ks = 0.0106177626514414 kd = 0.0248413487999932

SPAC57A10.09c

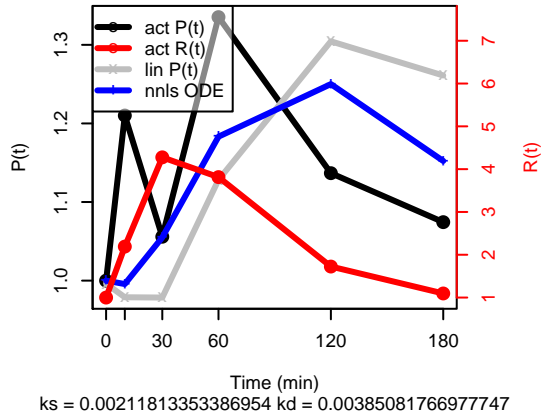

SPAC5H10.08c

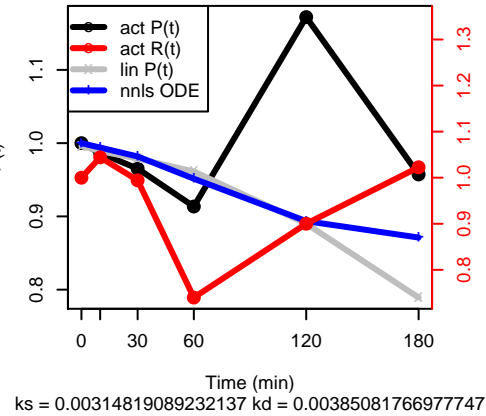

SPAC644.13c

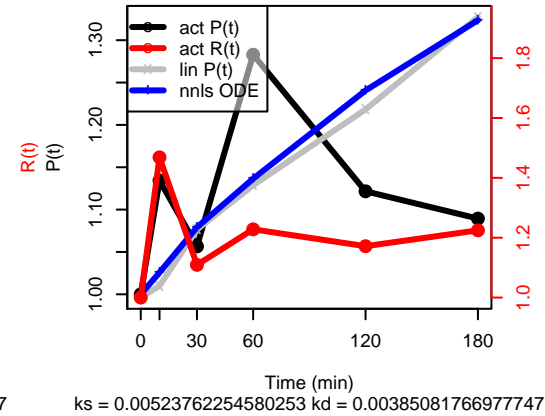

SPAC6F12.16c

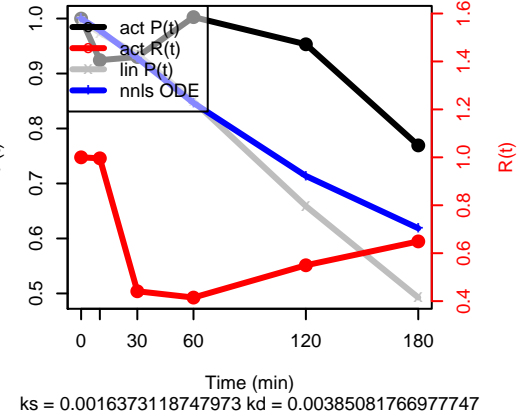

SPAC8F11.04

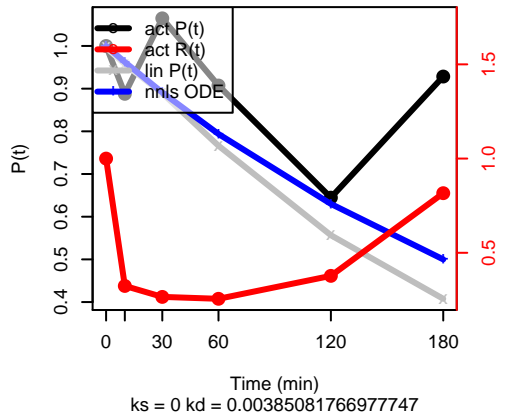

SPAC9E9.07c

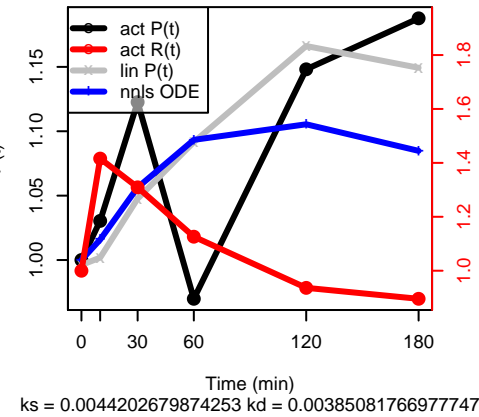

SPAPB1A10.09

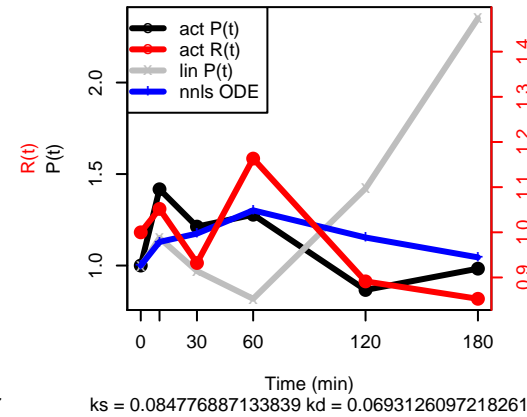

SPAPB2B4.05

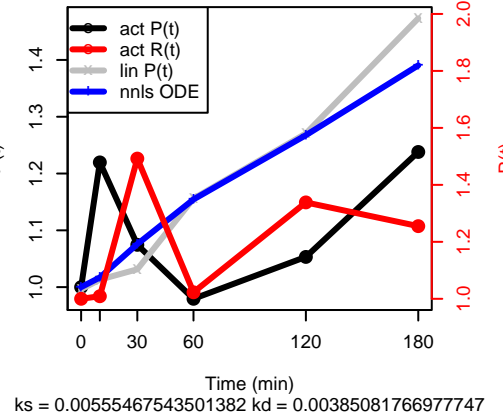

SPBC1271.04c

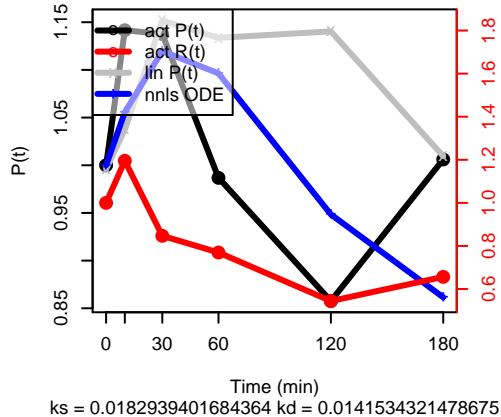

SPBC146.14c

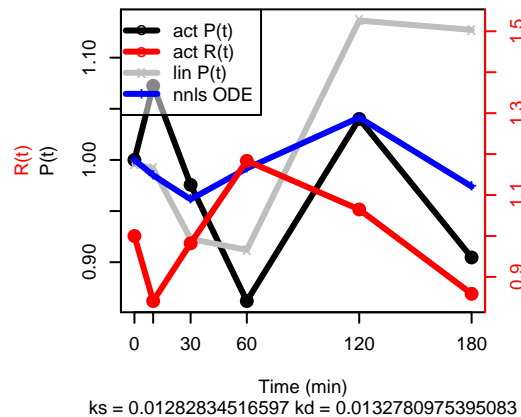

SPBC1604.07

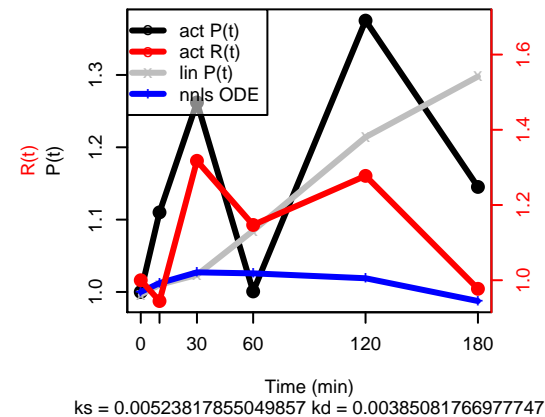

SPBC1773.02c

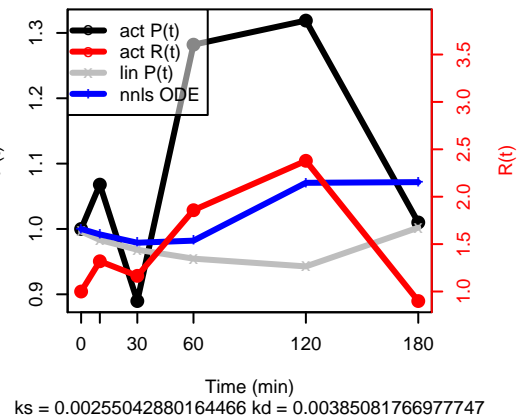

SPBC17F3.01c

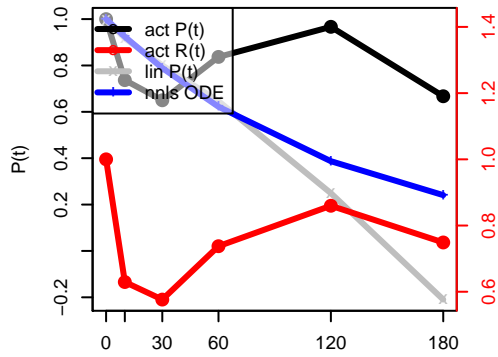

Time (min)  
ks = 0 kd = 0.00790979376294025

SPBC24C6.05

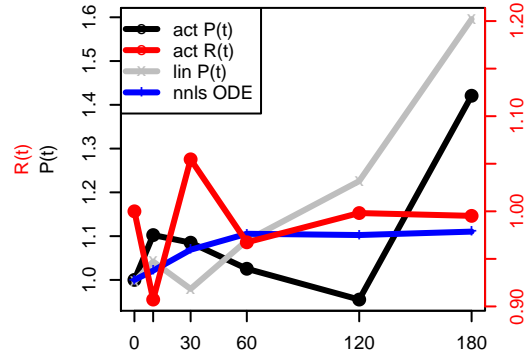

Time (min)  
ks = 0.0418288035372524 kd = 0.0372562302665146

SPBC2G5.06c

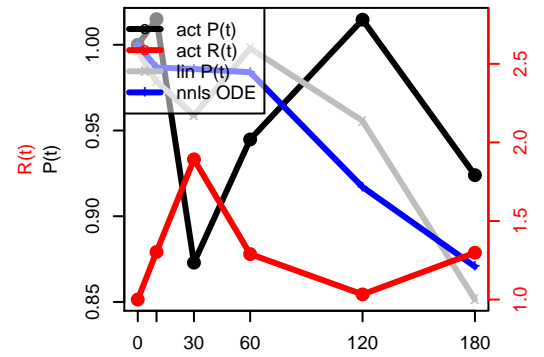

Time (min)  
ks = 0.00278649437494941 kd = 0.00454865737749686

SPBC30D10.03c

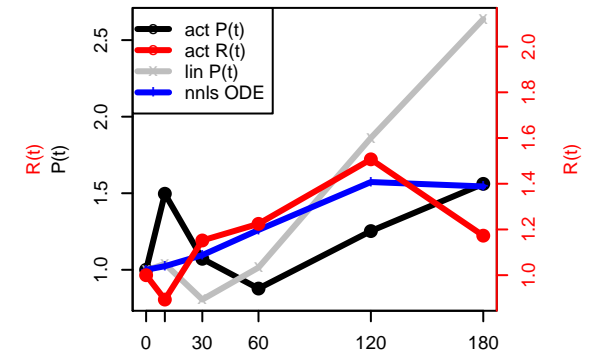

Time (min)  
ks = 0.0298956240901243 kd = 0.0256329276514304

SPBC31F10.04c

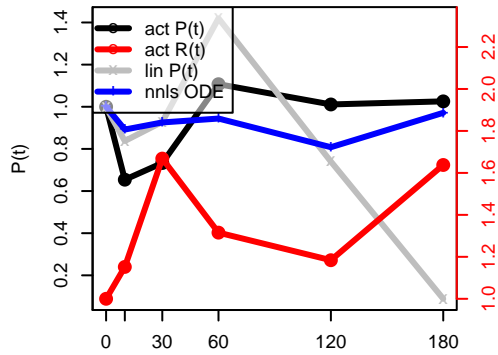

Time (min)  
ks = 0.0299477538666627 kd = 0.0458106417869624

SPBC31F10.12

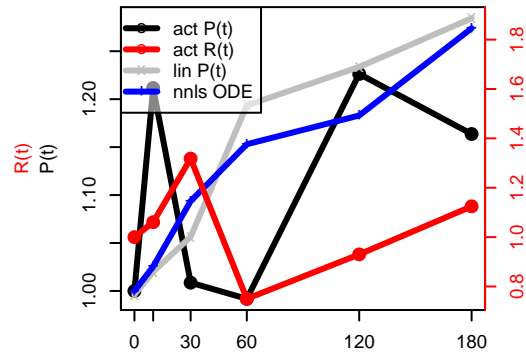

Time (min)  
ks = 0.00699875364173097 kd = 0.00461904418772995

SPBC337.07c

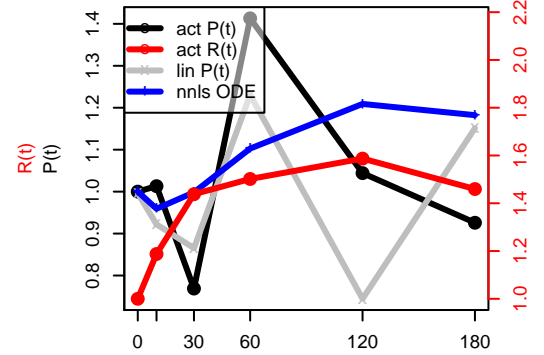

Time (min)  
ks = 0.0267374619928827 kd = 0.0341496758968861

SPBC3D6.02

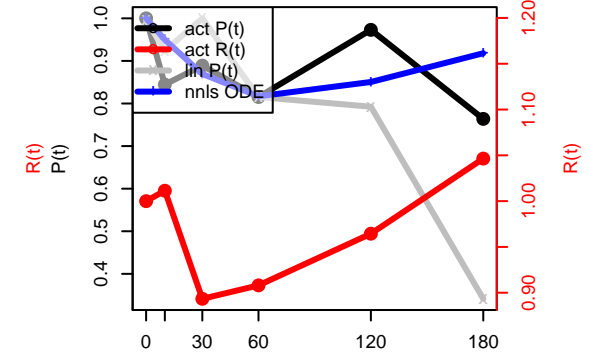

Time (min)  
ks = 0.0592040344033925 kd = 0.0664129350729195

SPBC530.10c

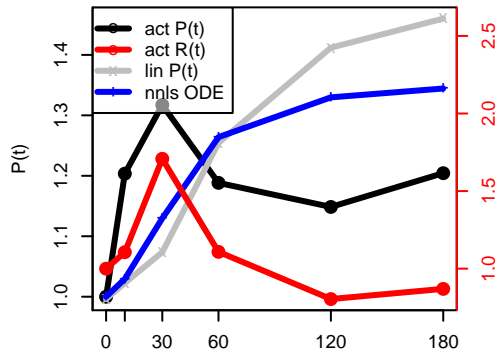

Time (min)  
ks = 0.006497345282288 kd = 0.00385081766977747

SPBC609.05

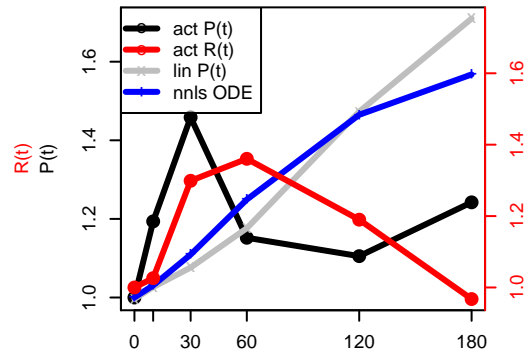

Time (min)  
ks = 0.00689413034007563 kd = 0.00385081766977747

SPBC660.15

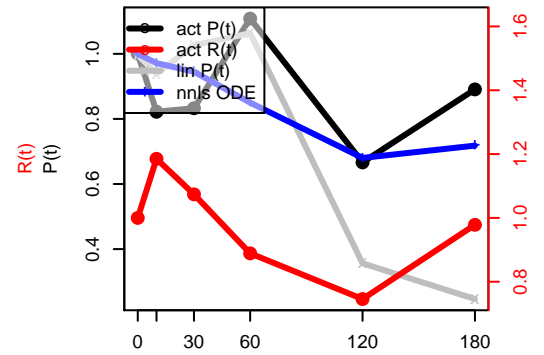

Time (min)  
ks = 0.024895631534755 kd = 0.0306017183613556

SPBC6B1.06c

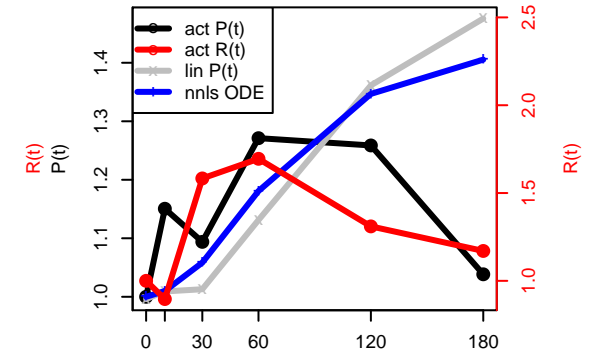

Time (min)  
ks = 0.00515170599363591 kd = 0.00385081766977747



SPBC83.17

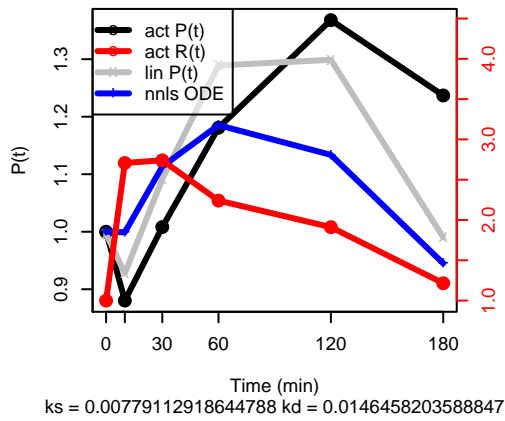

SPBC947.14c

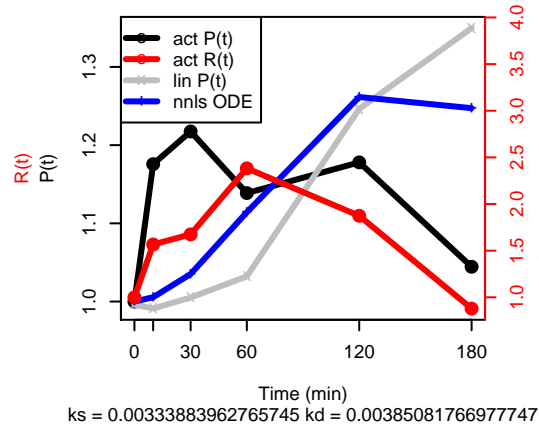

SPBP16F5.03c

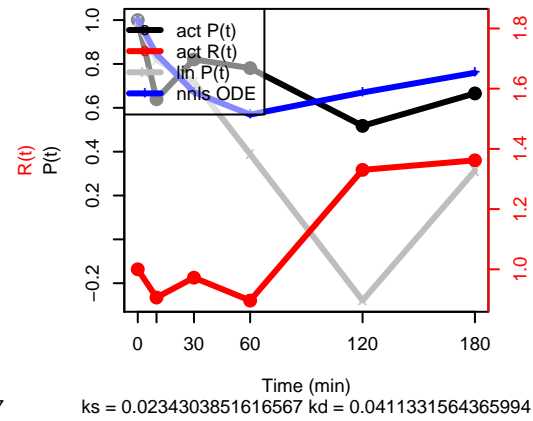

SPCC126.15c

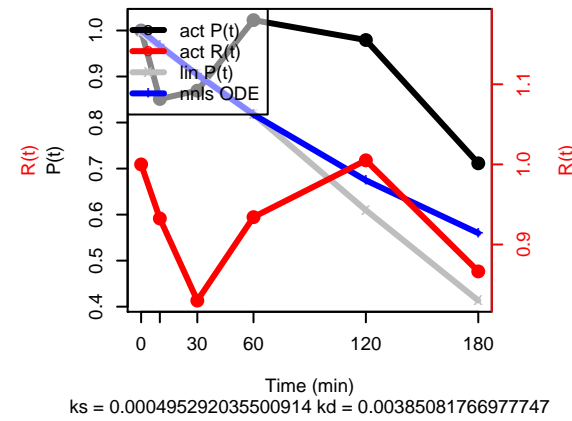

SPCC1620.08

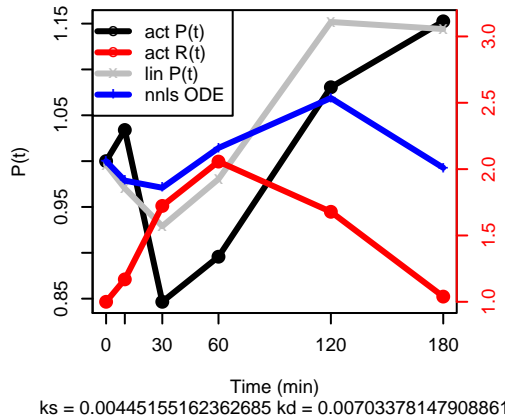

SPCC1682.10

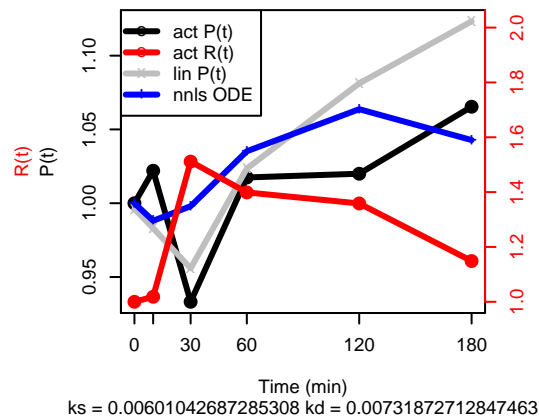

SPCC1795.03

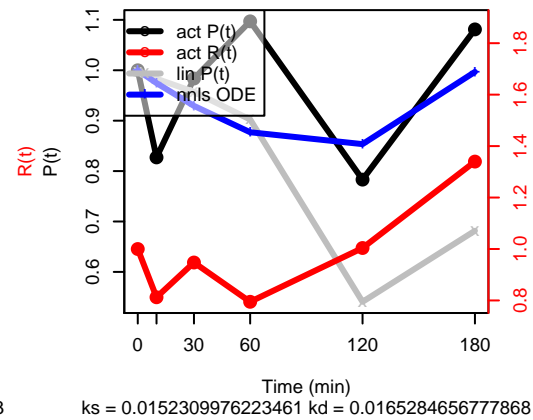

SPCC576.10c

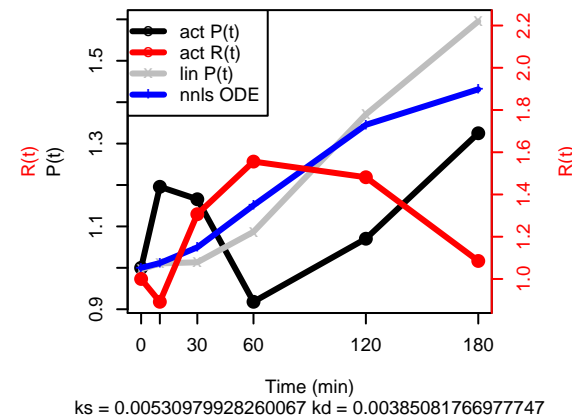

SPCC5E4.05c

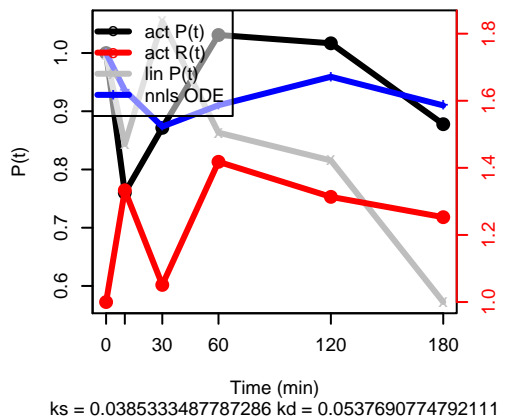

SPCC63.05

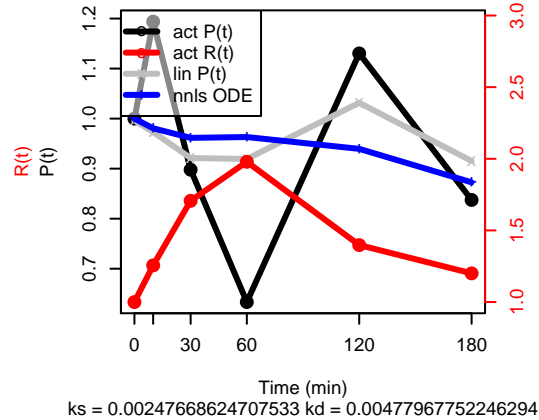

SPCC777.09c

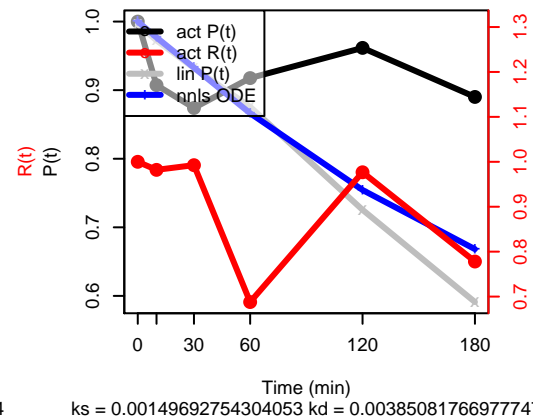

SPAC10F6.09c

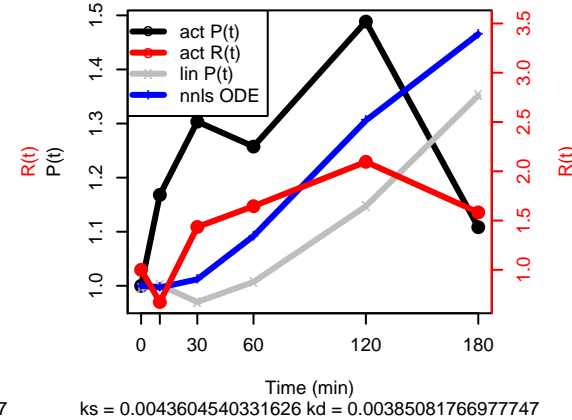

SPAC13D6.03c

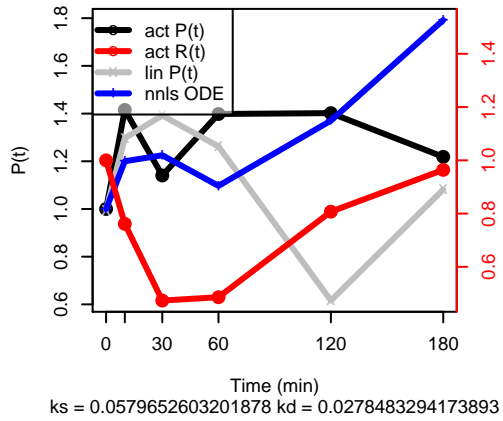

SPAC1486.01

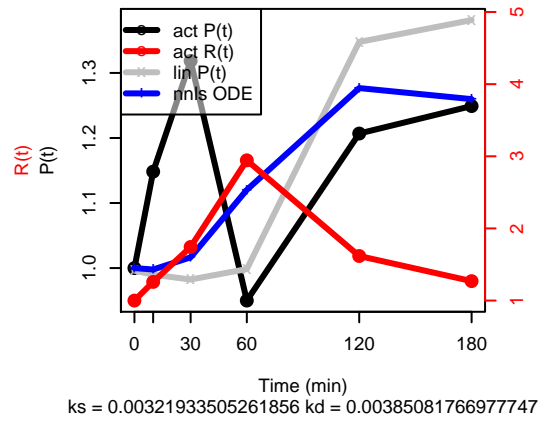

SPAC1527.03

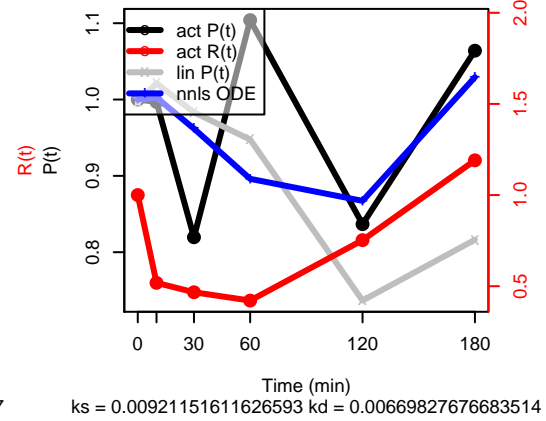

SPAC15A10.02

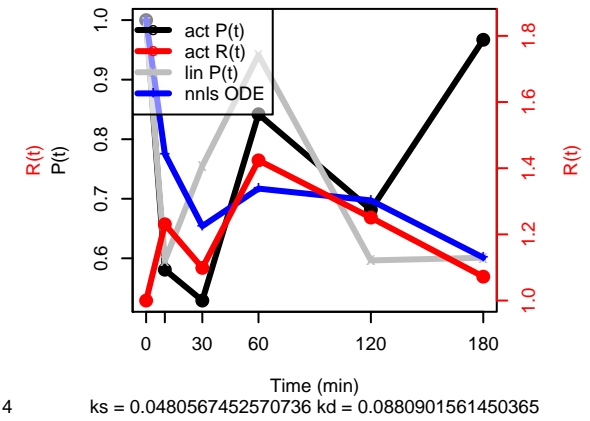

SPAC15E1.08

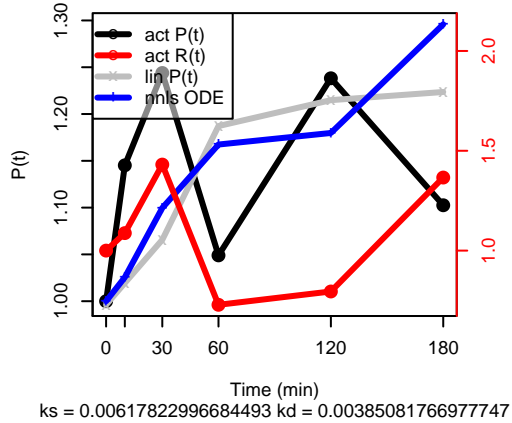

SPAC16E8.16

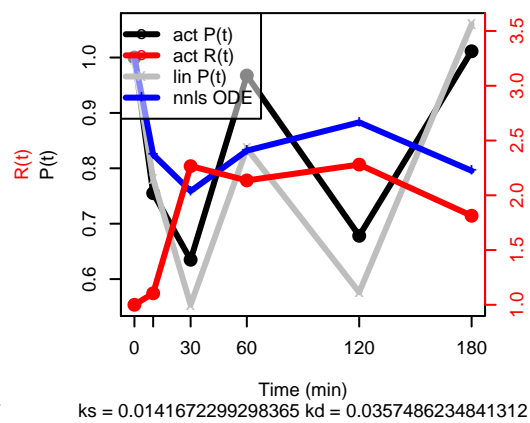

SPAC1782.11

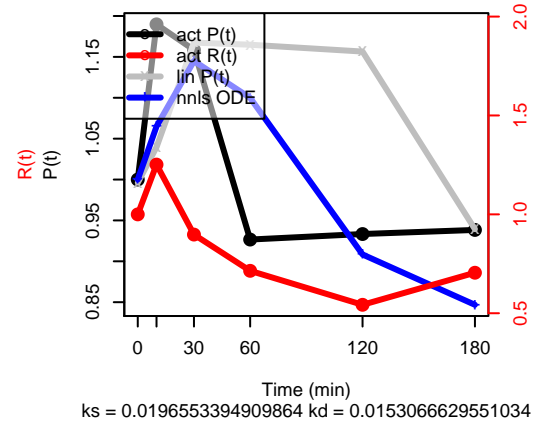

SPAC17G8.02

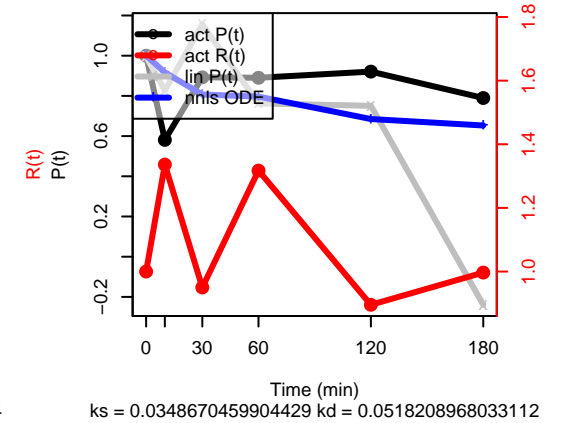

SPAC18G6.03

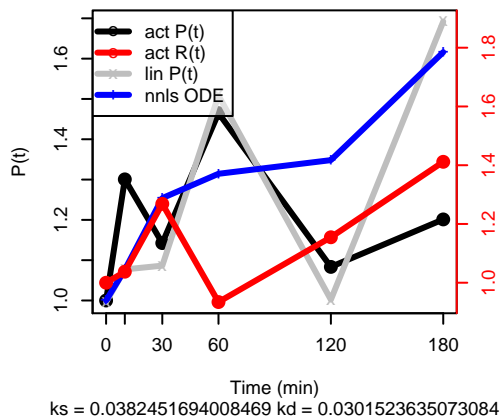

SPAC19B12.02c

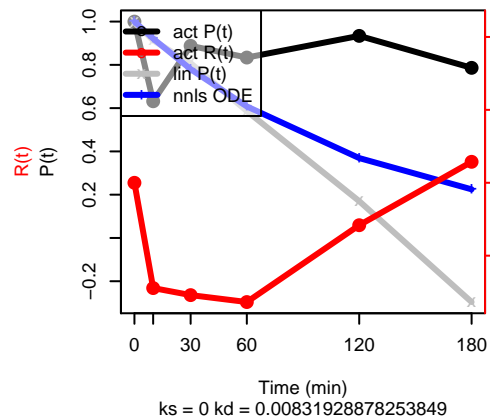

SPAC1F3.01

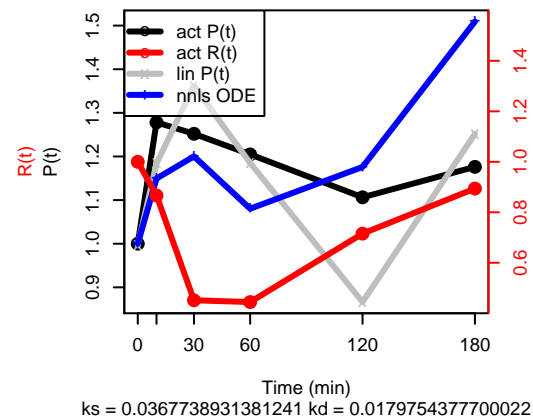

SPAC20G8.01

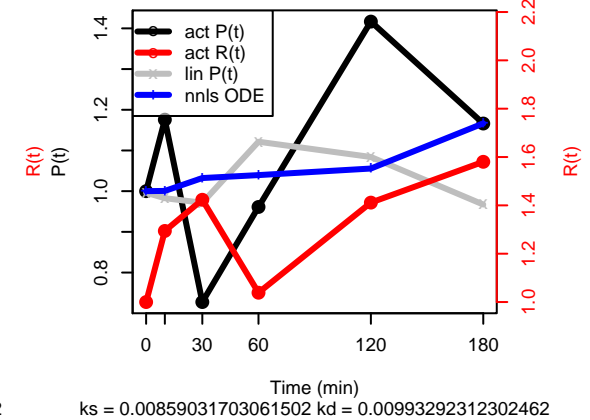

SPAC22Z.08c

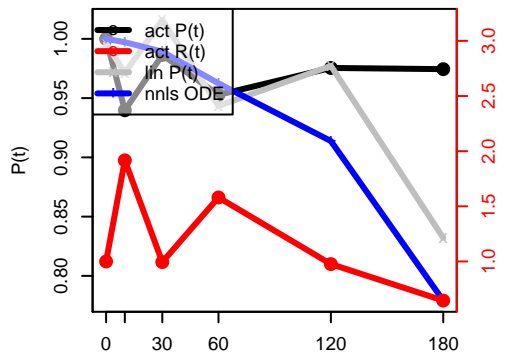

SPAC22A12.15c

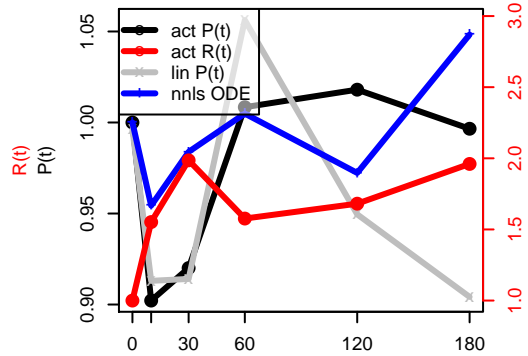

SPAC22A12.16

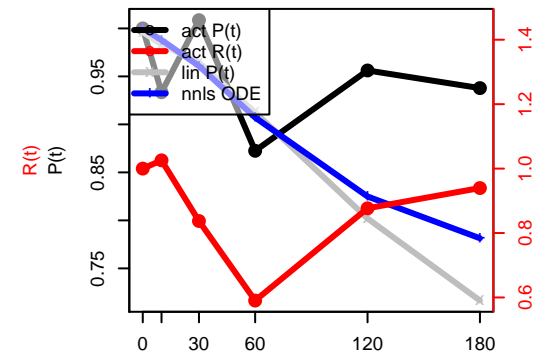

SPAC23A1.17

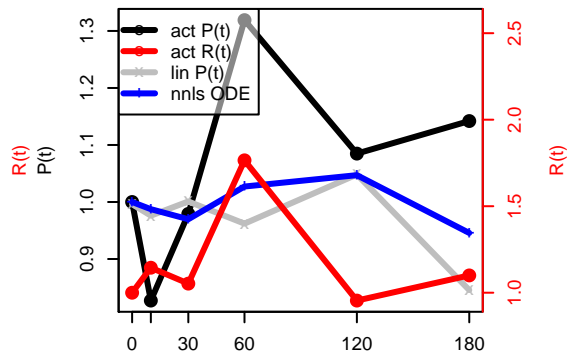

SPAC24B11.12c

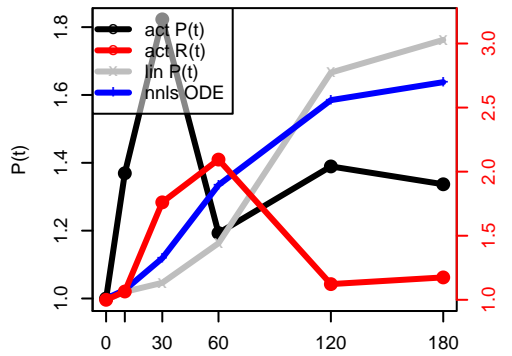

SPAC24C9.06c

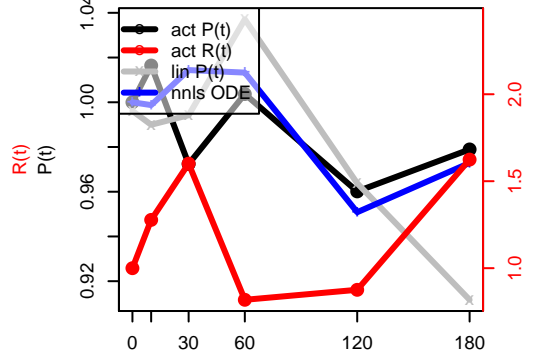

SPAC27F1.06c

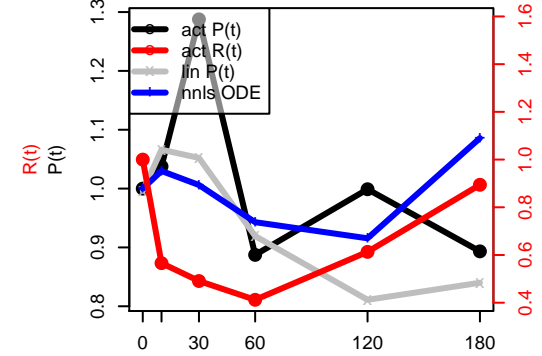

SPAC27F1.07

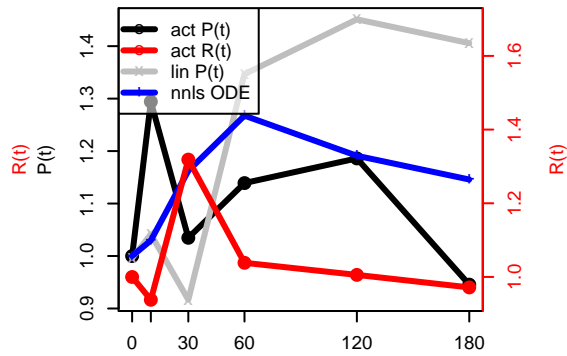

SPAC29A4.16

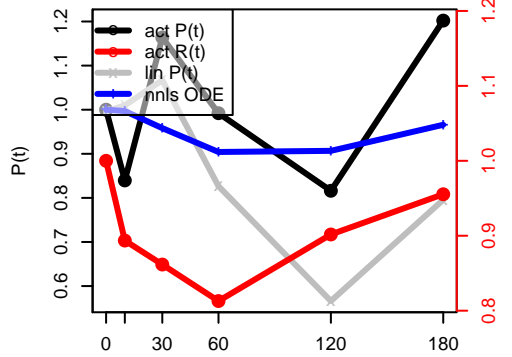

SPAC29B12.07

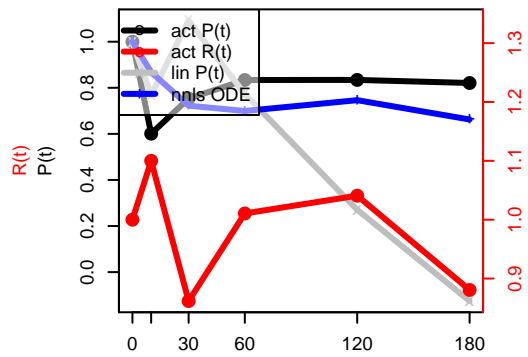

SPAC2F7.13c

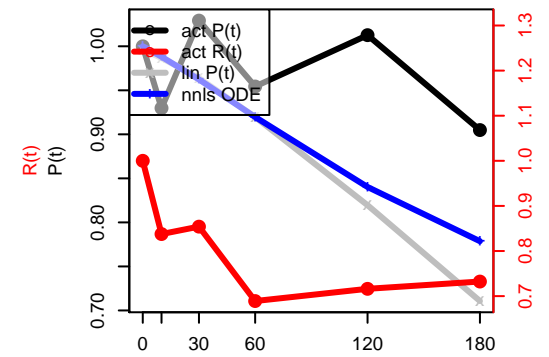

SPAC3A12.05c

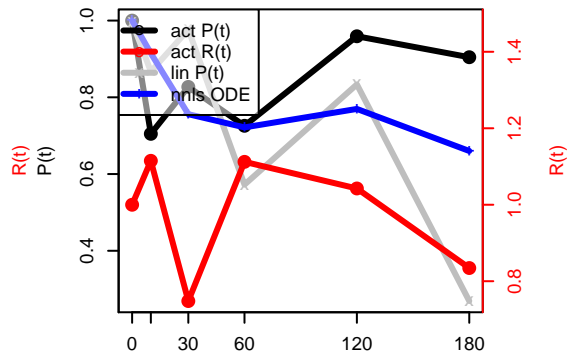

SPAC3G9.09c

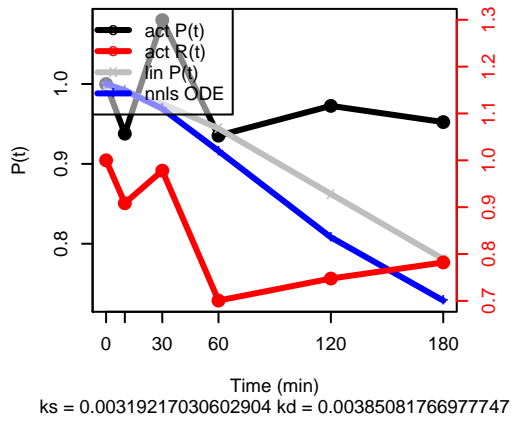

SPAC3H1.02c

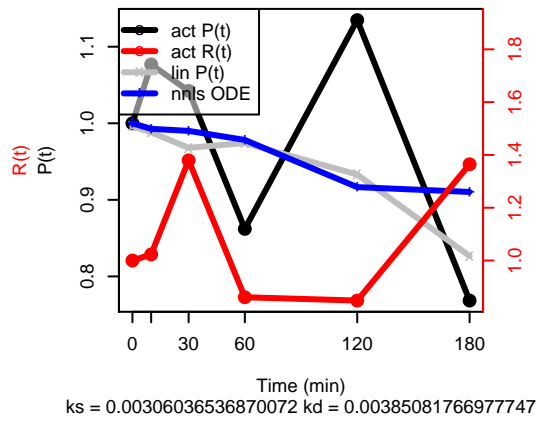

SPAC4A8.03c

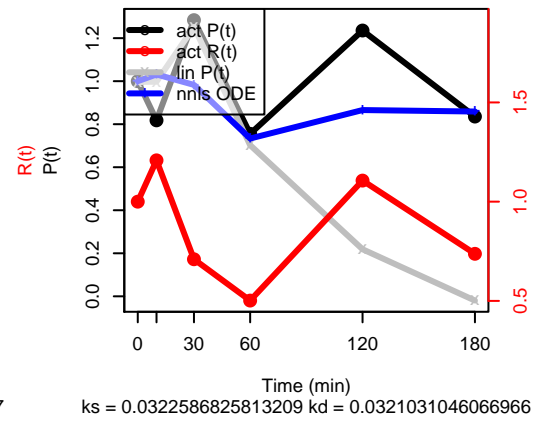

SPAC5H10.13c

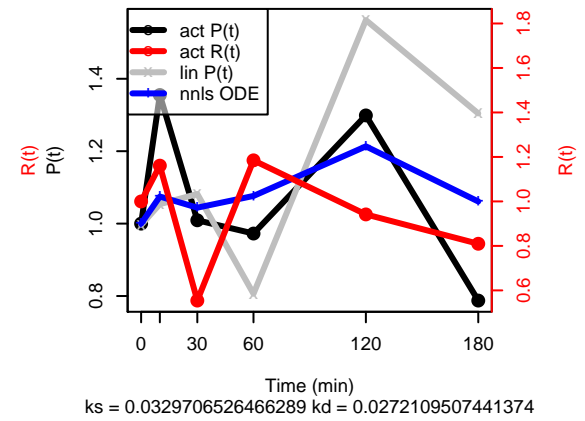

SPAC607.07c

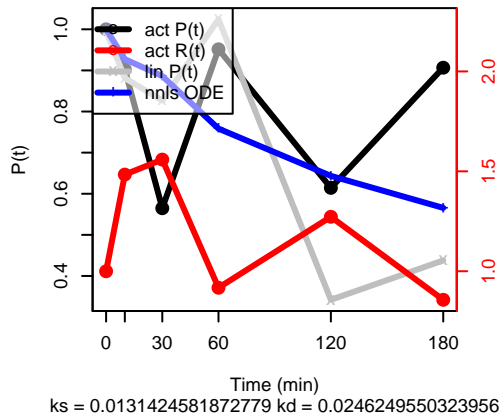

SPAC664.03

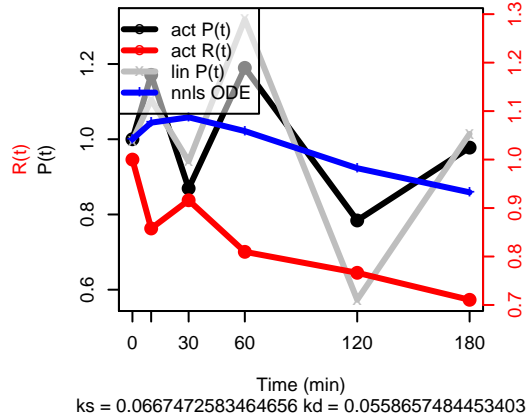

SPAC664.05

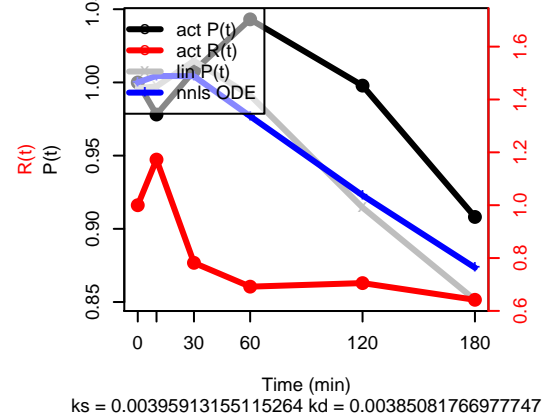

SPAC688.07c

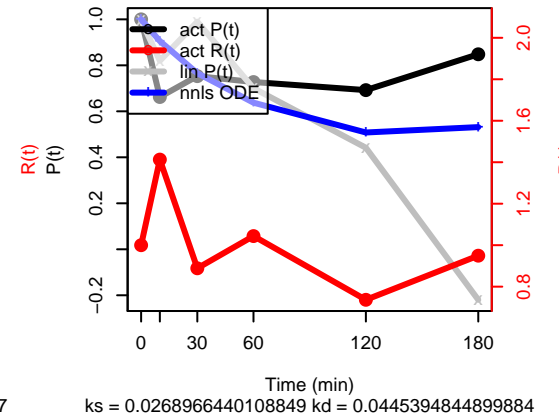

SPAC6C3.04

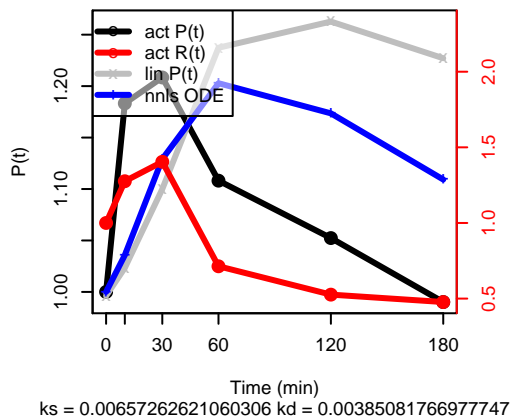

SPAC6F12.13c

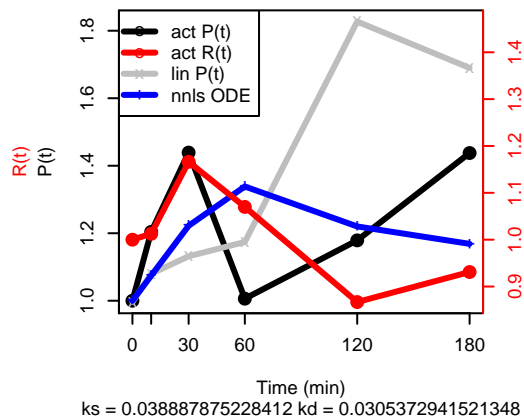

SPAC6F6.11c

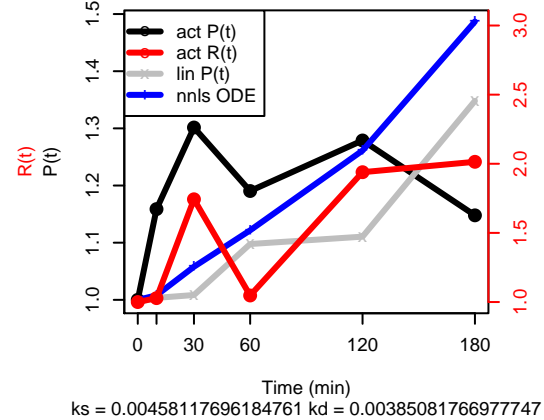

SPAC806.03c

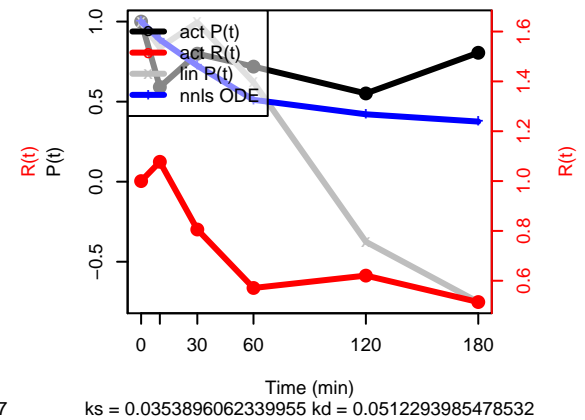

SPAC806.04c

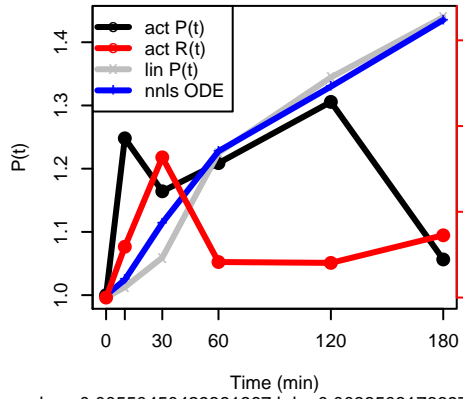

SPAC823.14

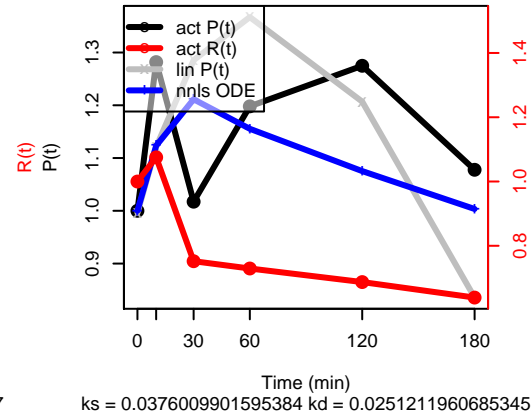

SPAC9G1.05

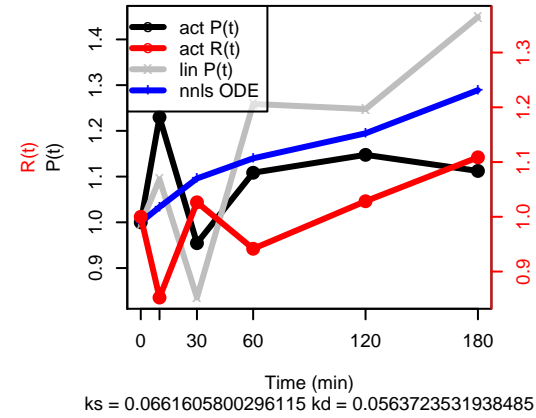

SPAC9G1.11c

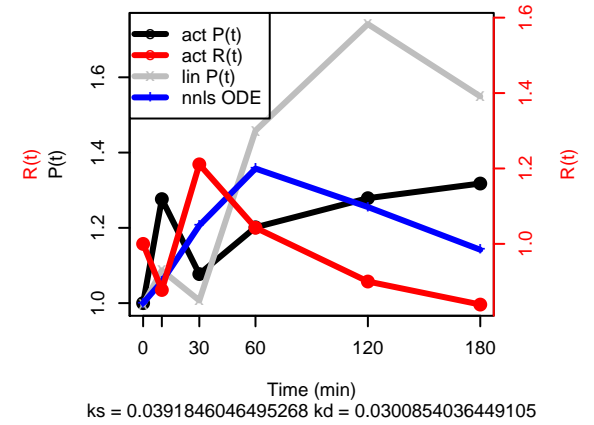

SPAP27G11.06c

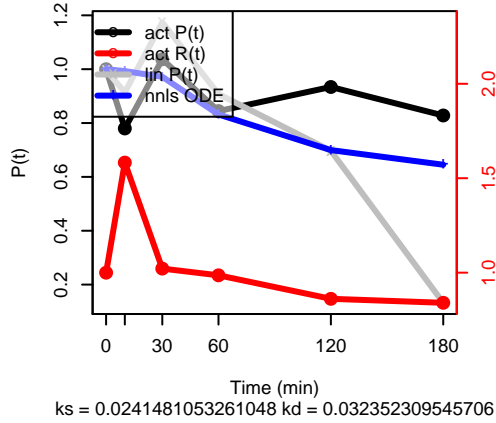

SPBC119.09c

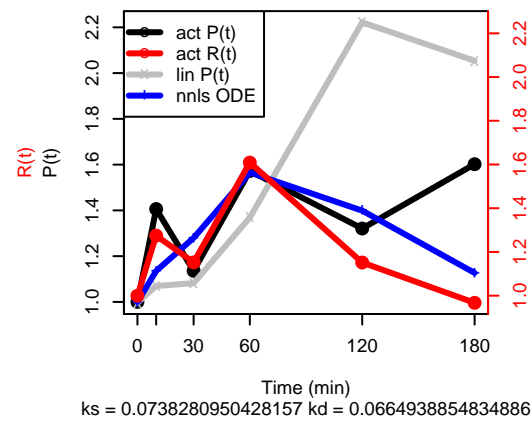

SPBC11C11.02

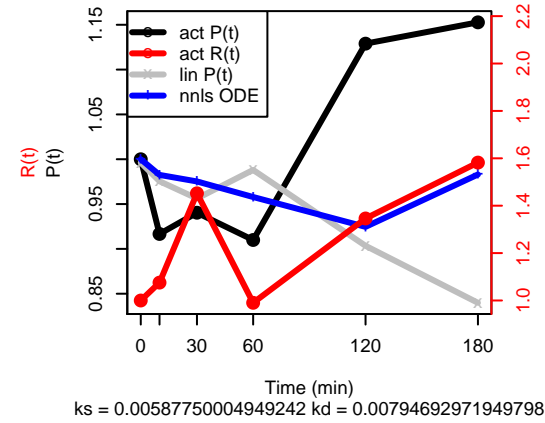

SPBC11G11.07

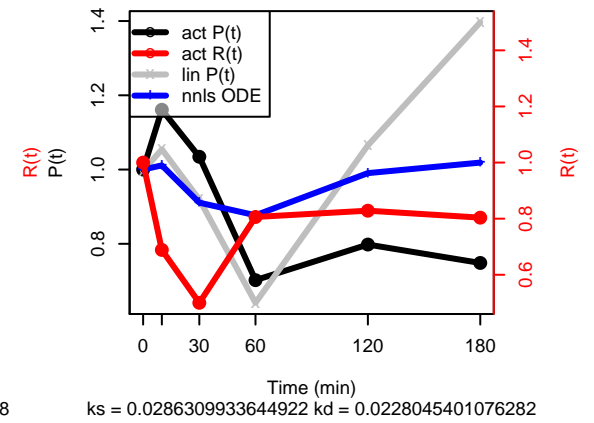

SPBC1289.12

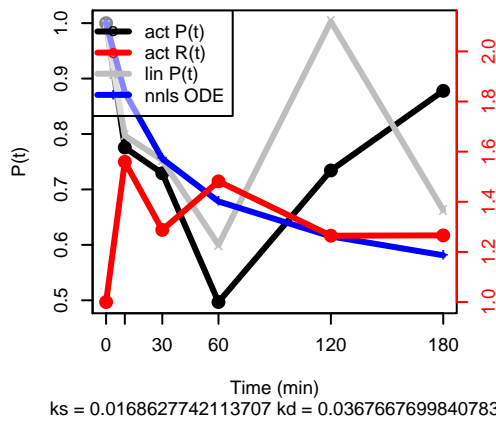

SPBC1683.10c

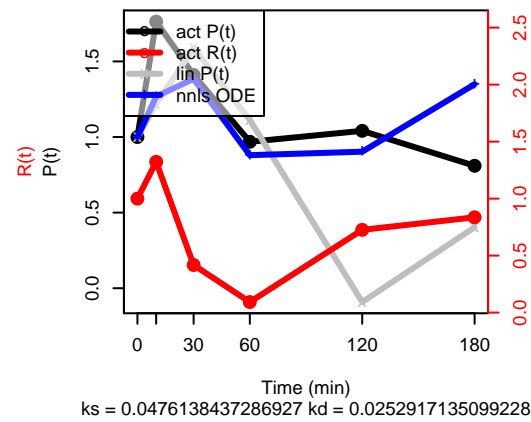

SPBC16C6.05

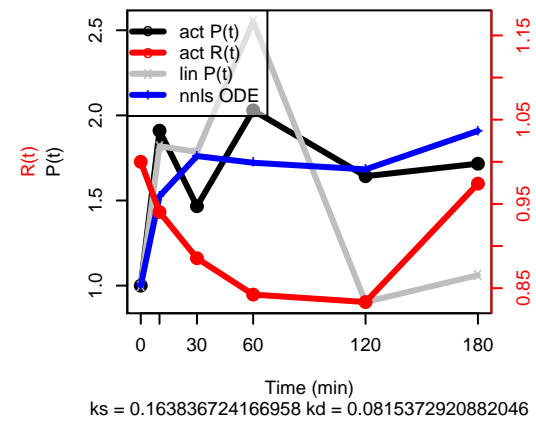

SPBC16G5.18

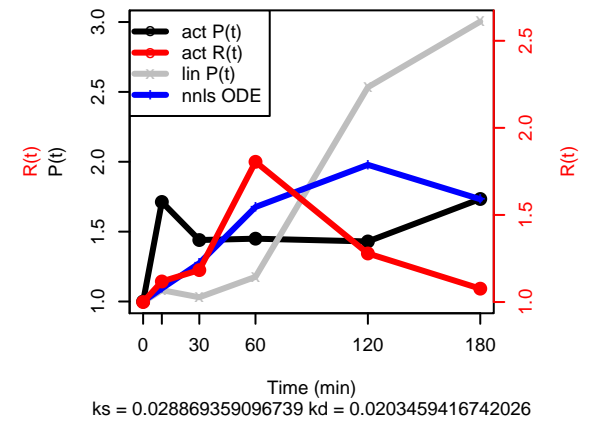

SPBC1734.13

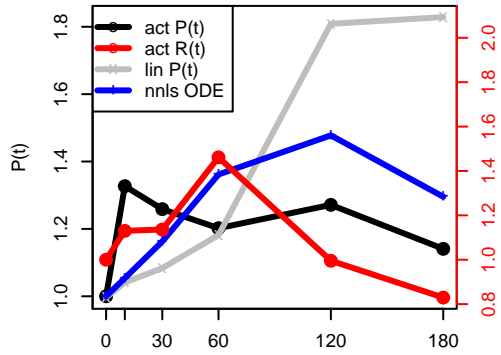

ks = 0.0194965279254591 kd = 0.0150047499470569

SPBC18H10.12c

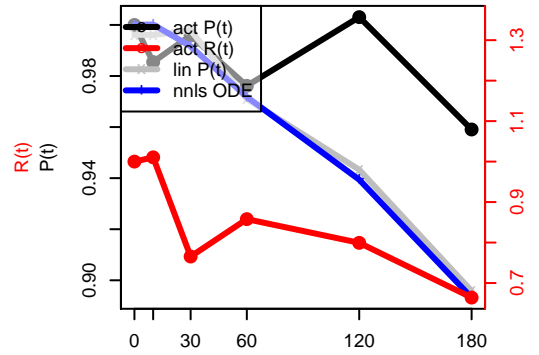

ks = 0.00384285760094282 kd = 0.00385081766977747

SPBC19F5.04

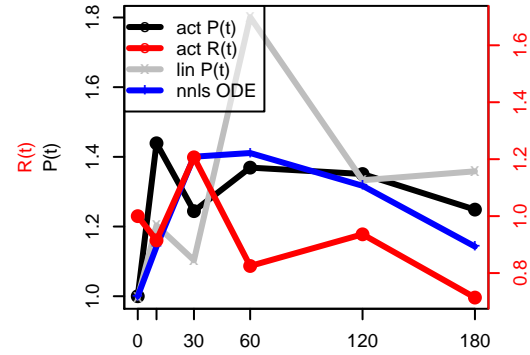

ks = 0.0664552768921947 kd = 0.0457405720085234

SPBC21C3.09c

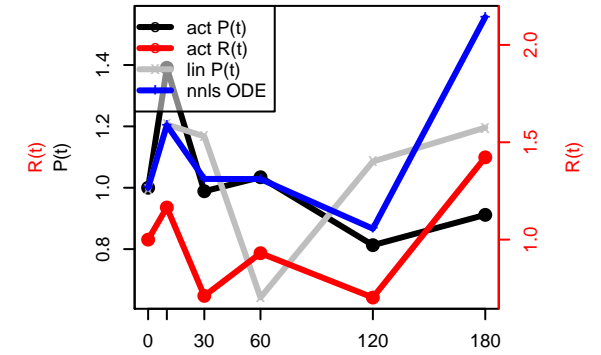

ks = 0.137864370872176 kd = 0.116852988929764

SPBC25H2.11c

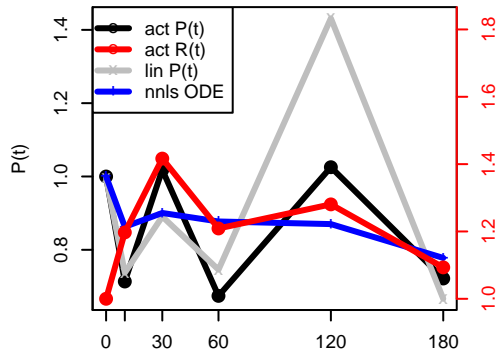

ks = 0.0540038313346283 kd = 0.0798786397699894

SPBC27B12.13

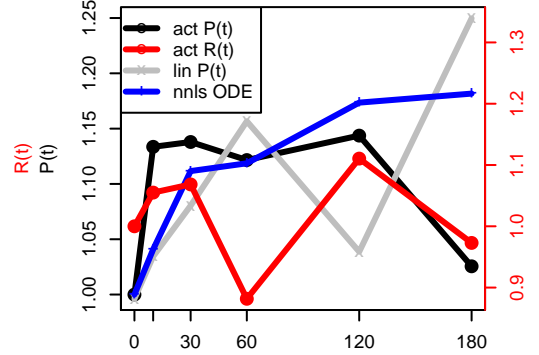

ks = 0.0261159365497804 kd = 0.0222829063093775

SPBC31A8.01c

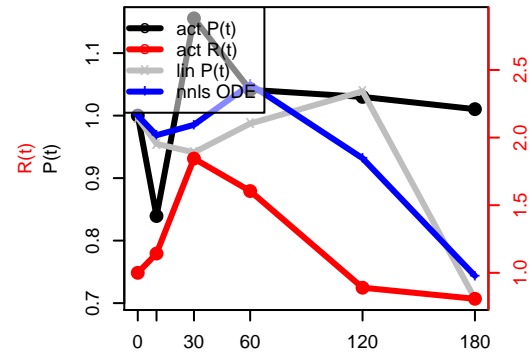

ks = 0.00915223714503351 kd = 0.0132802529357417

SPBC36.05c

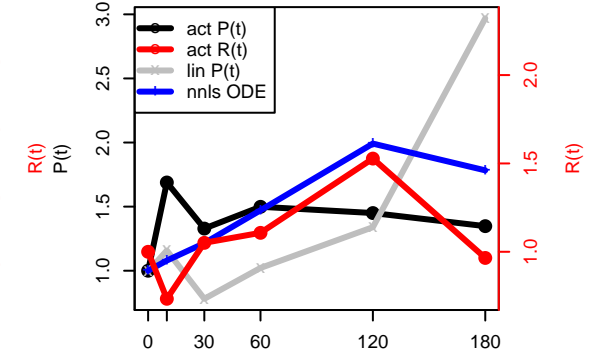

ks = 0.0482840737364805 kd = 0.0321393237748033

SPBC3B8.02

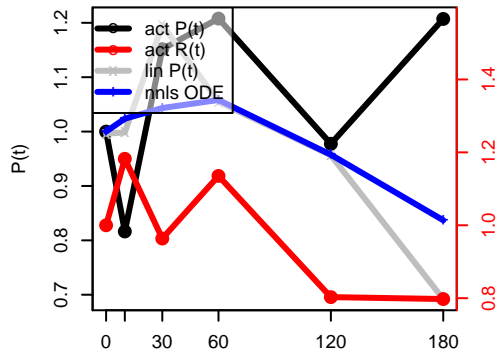

ks = 0.0265017489969297 kd = 0.0262710470540449

SPBC428.11

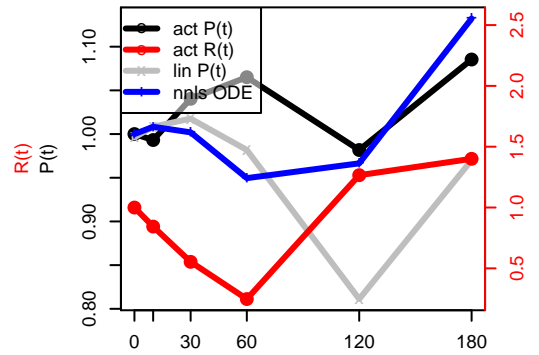

ks = 0.00507895669127828 kd = 0.00385081766977747

SPBC4F6.04

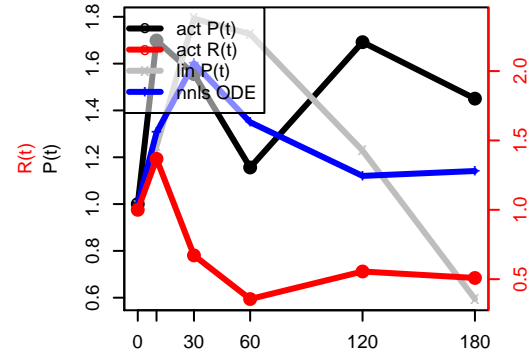

ks = 0.0467382187140752 kd = 0.0215890879925798

SPBC530.14c

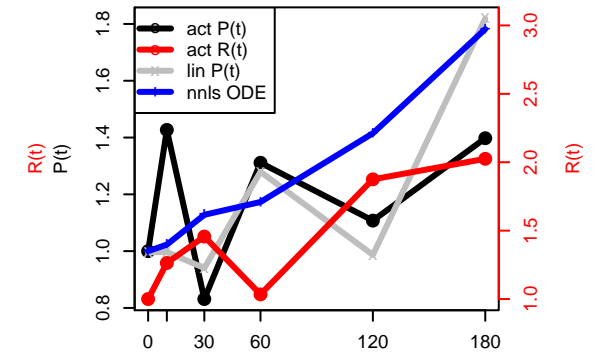

ks = 0.0179627677440215 kd = 0.0178870112524024

SPBC582.07c

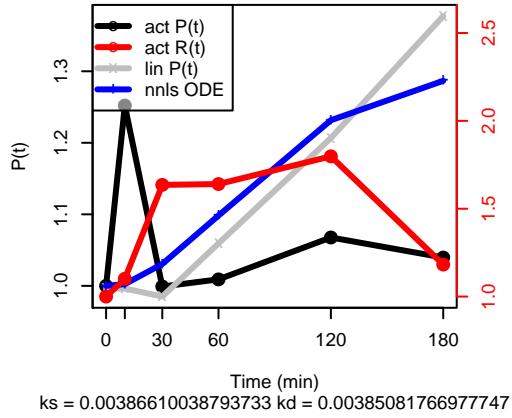

SPBC725.01

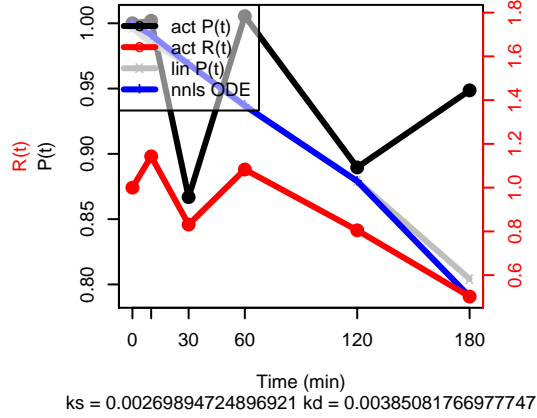

SPBC800.08

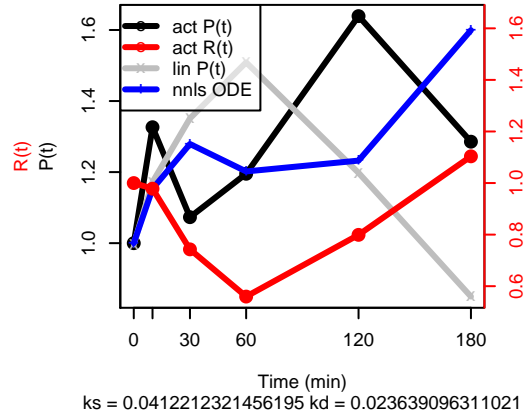

SPBC83.15

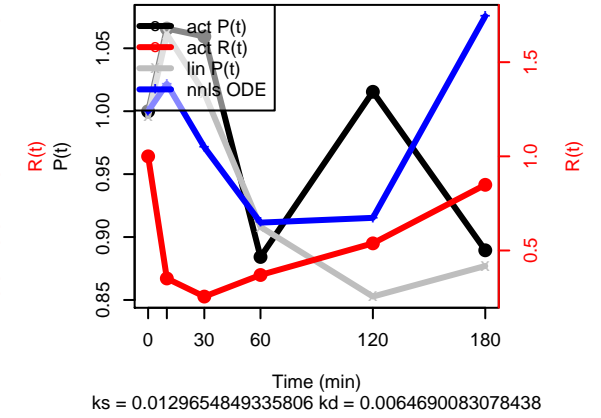

SPBC887.03c

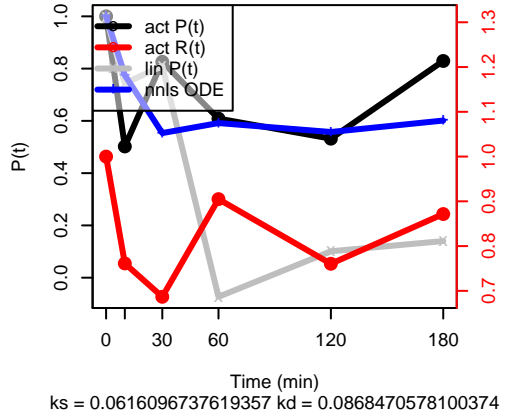

SPBP8B7.23

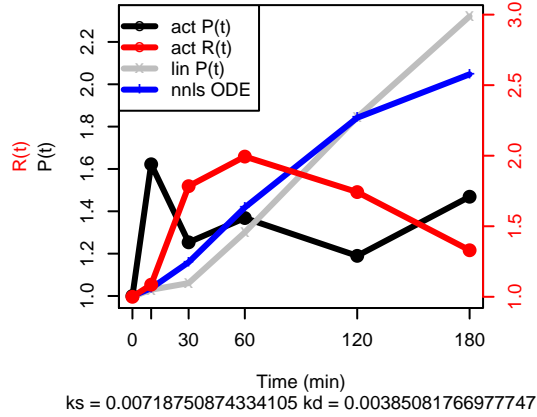

SPBP8B7.26

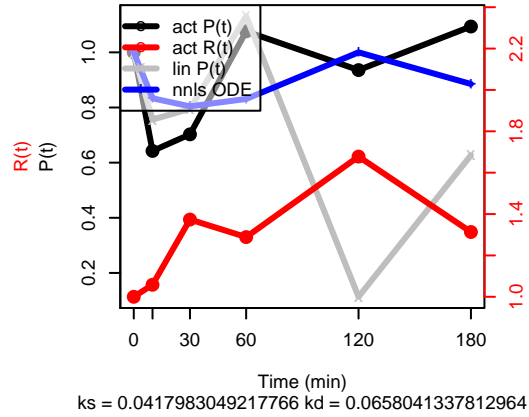

SPCC126.11c

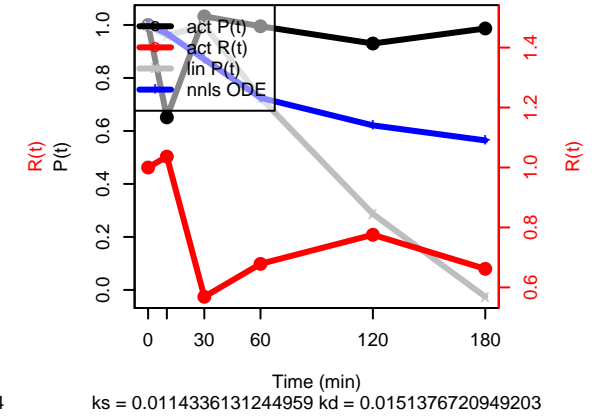

SPCC1450.15

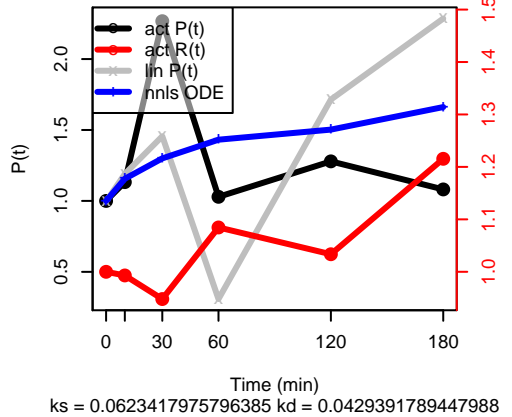

SPCC1795.05c

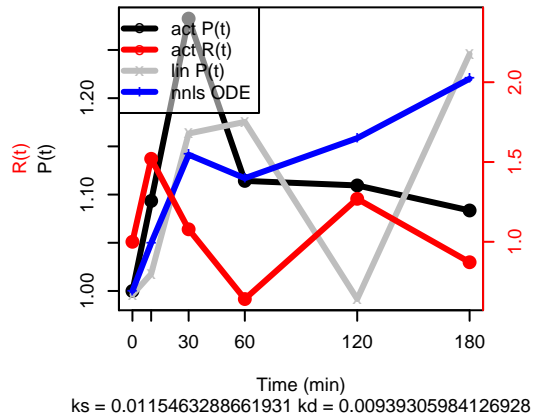

SPCC18.07

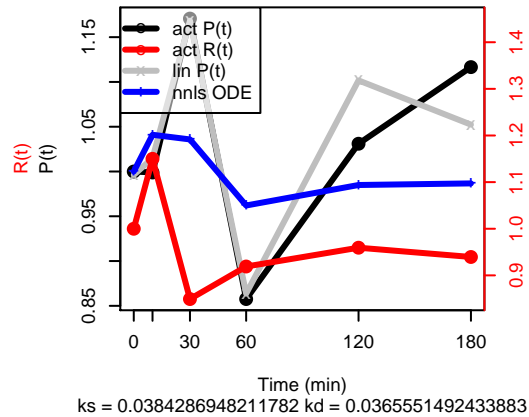

SPCC1840.02c

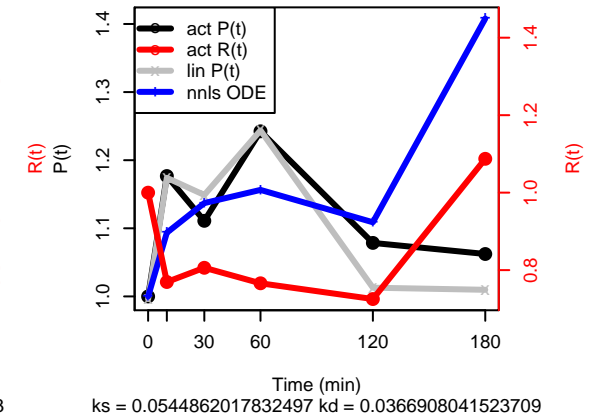



SPCC1840.08c

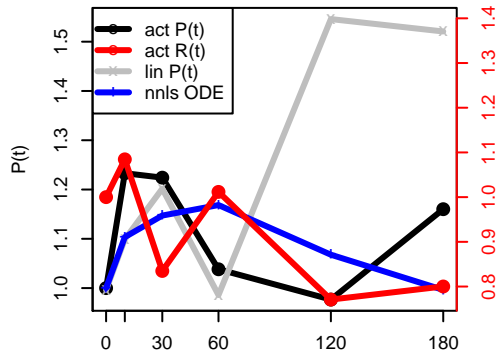

Time (min)  
ks = 0.050841169647679 kd = 0.040553275385784

SPCC24B10.19c

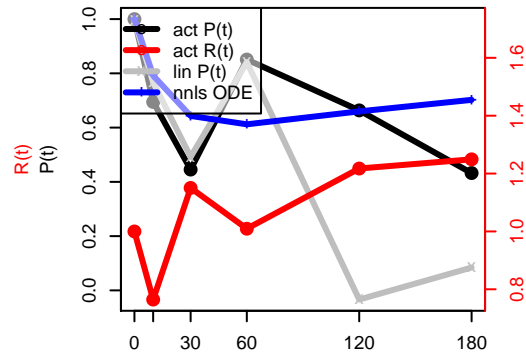

Time (min)  
ks = 0.03100518974655 kd = 0.0539195746824063

SPCC31H12.03c

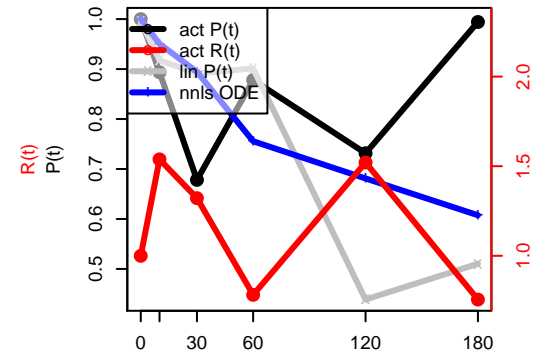

Time (min)  
ks = 0.00876473704798531 kd = 0.0165864505082023

SPCC4G3.14

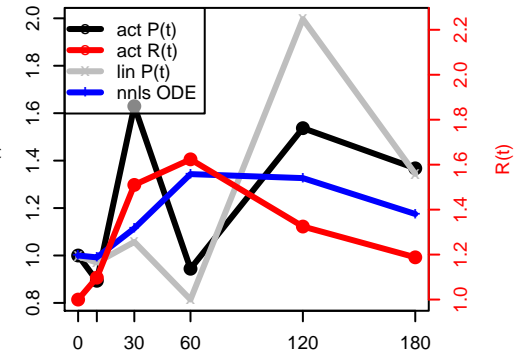

Time (min)  
ks = 0.0325874186843433 kd = 0.035168431543845

SPCC553.02

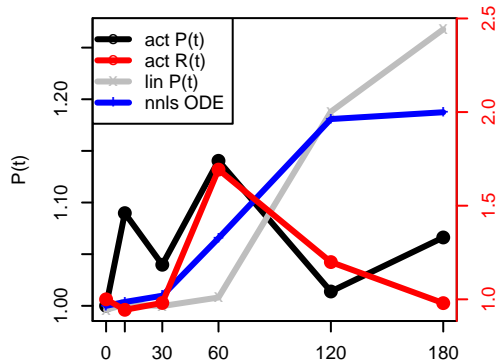

Time (min)  
ks = 0.00436481894198625 kd = 0.00385081766977747

SPCC70.05c

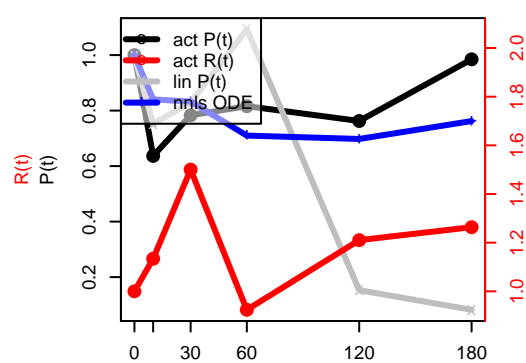

Time (min)  
ks = 0.0388362355337065 kd = 0.0631810550722997

SPCC74.06

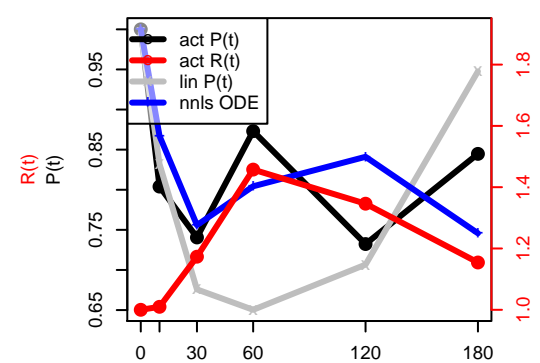

Time (min)  
ks = 0.026114415576808 kd = 0.0425200441213437

SPCC970.08

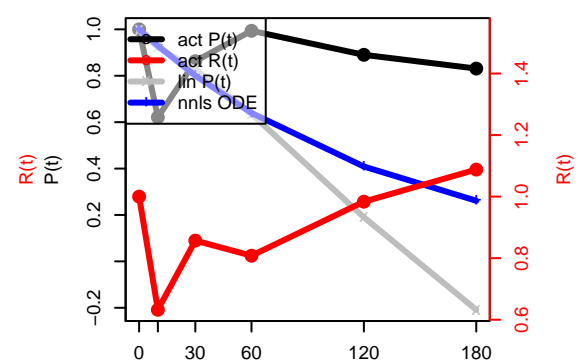

Time (min)  
ks = 0 kd = 0.00746731258676649

SPCP1E11.06

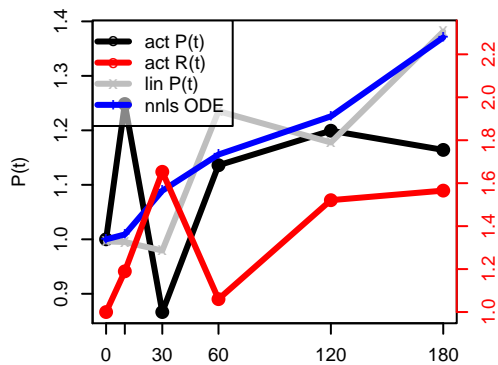

Time (min)  
ks = 0.0109675272975001 kd = 0.0110790436053292

SPAC14C4.04

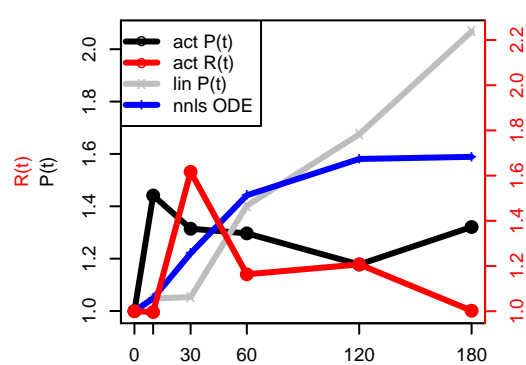

Time (min)  
ks = 0.0160434173853728 kd = 0.0108907143078148

SPAC167.02

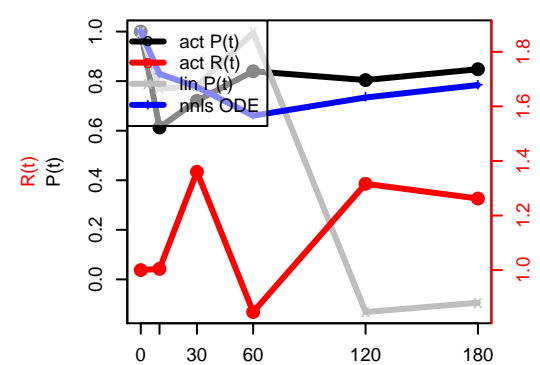

Time (min)  
ks = 0.0368392672885931 kd = 0.0595049236663642

SPAC1687.04

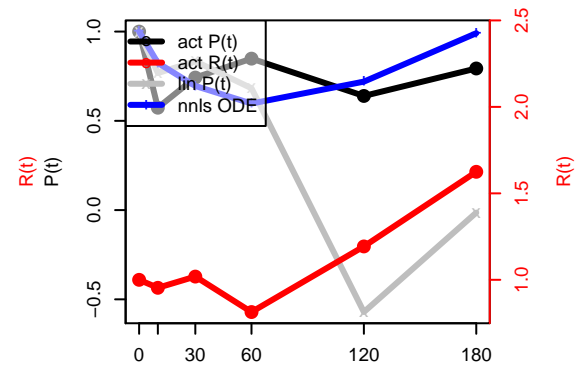

Time (min)  
ks = 0.0431461442921594 kd = 0.0659971606344276

SPAC16C9.04c

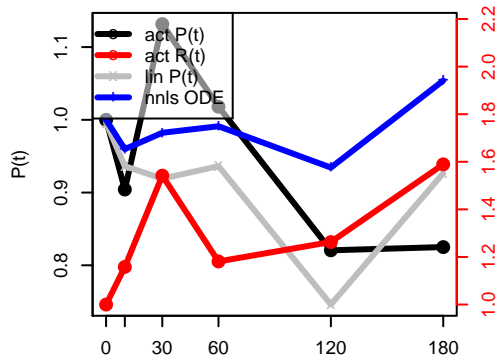

Time (min)  
ks = 0.0179090941854333 kd = 0.0238940319609653

SPAC17A5.16

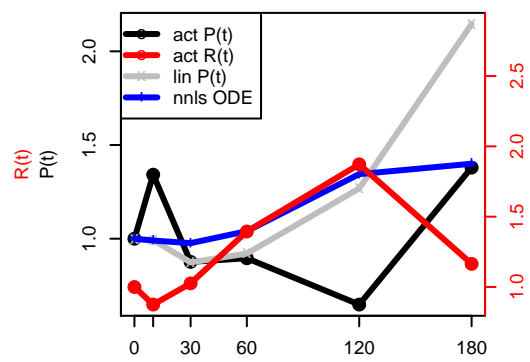

Time (min)  
ks = 0.0120894573785458 kd = 0.0123570444641688

SPAC18G6.15

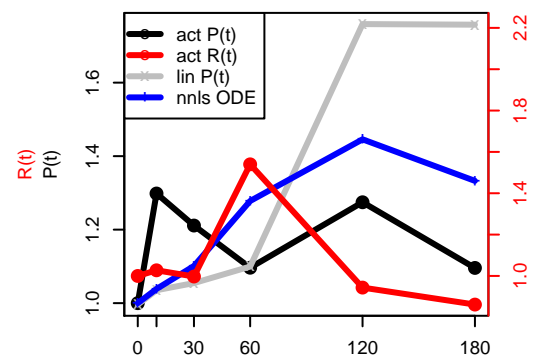

Time (min)  
ks = 0.0151329930016558 kd = 0.0112252966113319

SPAC1F12.10c

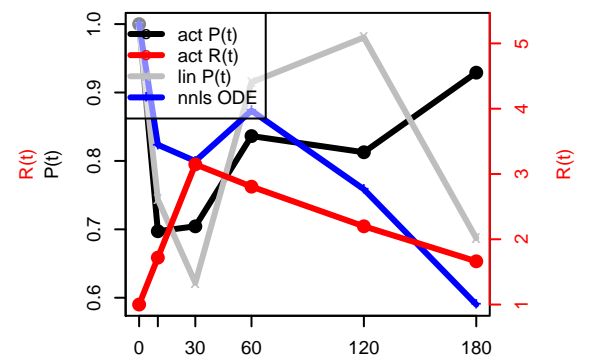

Time (min)  
ks = 0.0112793152950081 kd = 0.0365366206143197

SPAC1F7.11c

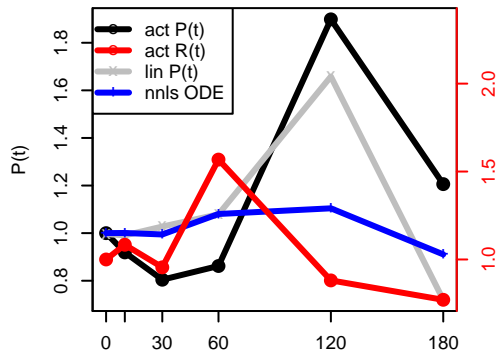

Time (min)  
ks = 0.0143352552431842 kd = 0.0148886249404607

SPAC22E12.04

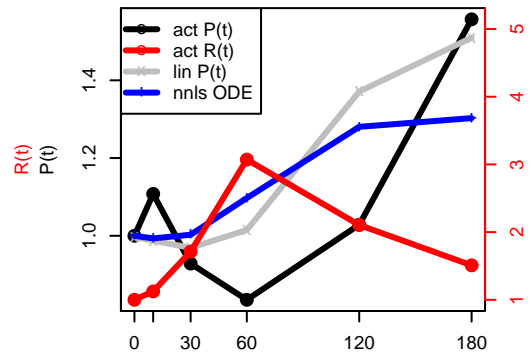

Time (min)  
ks = 0.0029797979792171 kd = 0.00385081766977747

SPAC22H12.03

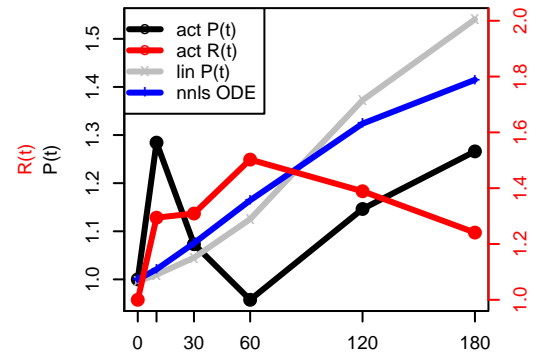

Time (min)  
ks = 0.00519540489474888 kd = 0.00385081766977747

SPAC23C11.09

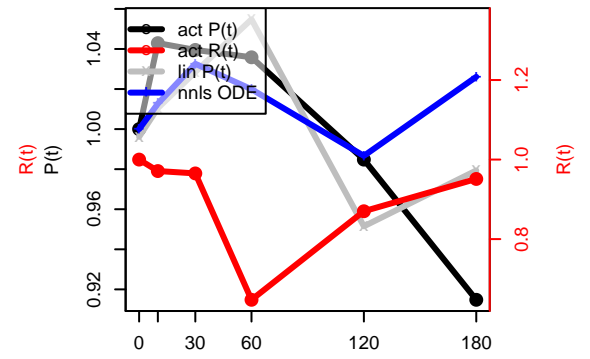

Time (min)  
ks = 0.00825271975846804 kd = 0.00682001970509495

SPAC23C11.14

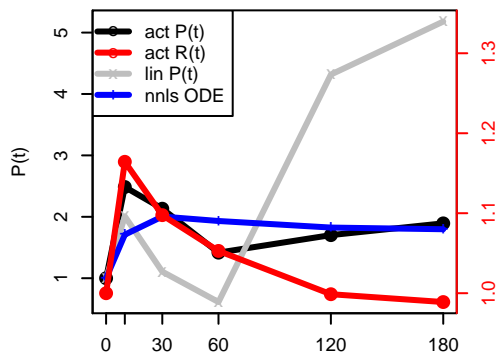

Time (min)  
ks = 0.224469092455827 kd = 0.123284020134031

SPAC23C4.06c

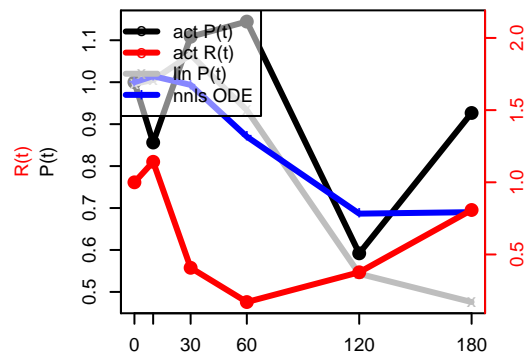

Time (min)  
ks = 0.00777026615836753 kd = 0.00684030470136844

SPAC23D3.13c

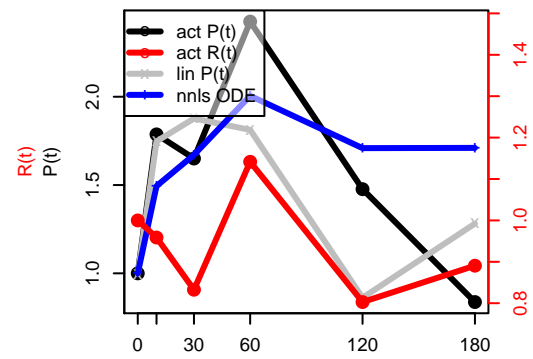

Time (min)  
ks = 0.154181975815018 kd = 0.0790898927066108

SPAC3G9.12

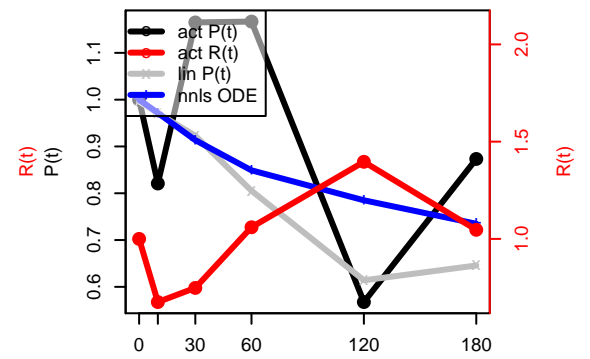

Time (min)  
ks = 0.00236014519600503 kd = 0.00487654216734428

SPAC3H8.07c

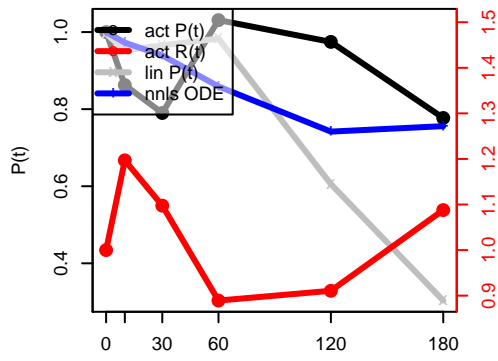

Time (min)  
ks = 0.0129978143362332 kd = 0.0173132839073802

SPAC4D7.05

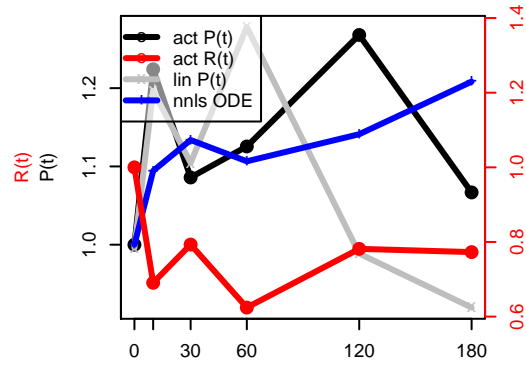

Time (min)  
ks = 0.0546546619366439 kd = 0.0345948147270418

SPAC4F8.01

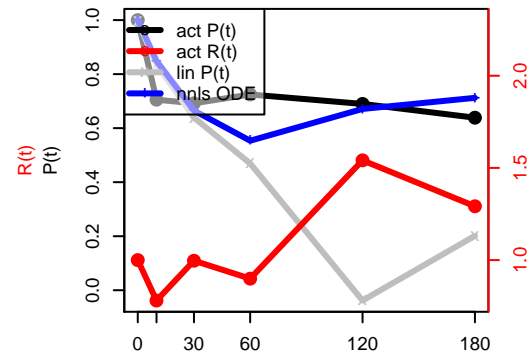

Time (min)  
ks = 0.0175809643004964 kd = 0.03349133853544

SPAC5H10.03

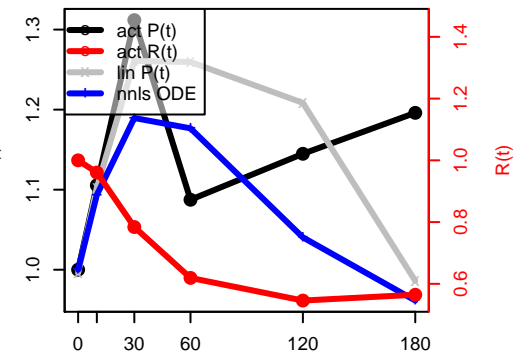

Time (min)  
ks = 0.0265119040574857 kd = 0.0158772103159948

SPAC688.11

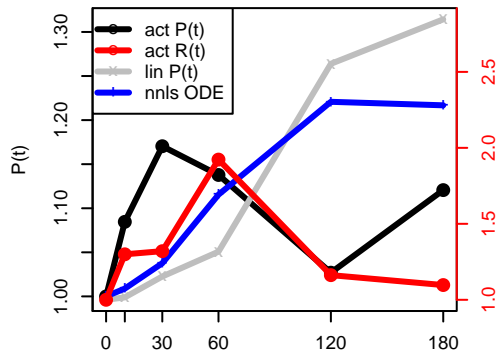

Time (min)  
ks = 0.00412556630934668 kd = 0.00385081766977747

SPAPB8E5.09

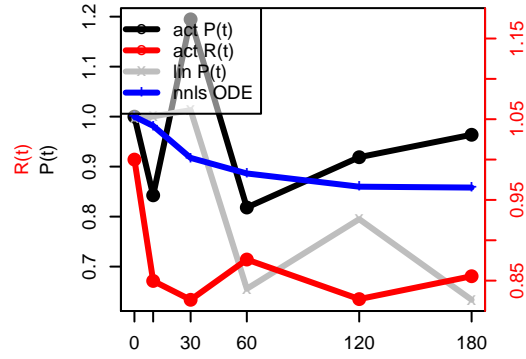

Time (min)  
ks = 0.033786826667574 kd = 0.0333394650335747

SPBC15D4.14

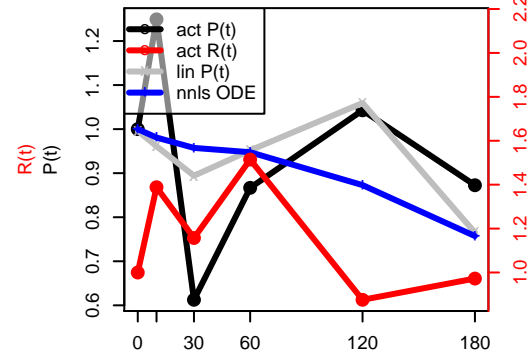

Time (min)  
ks = 0.00746436126296864 kd = 0.0109717289019195

SPBC16A3.14

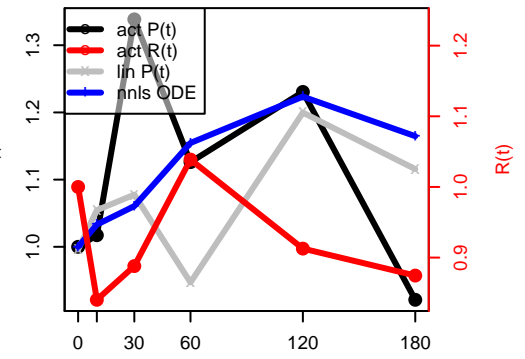

Time (min)  
ks = 0.0270003407944659 kd = 0.0211661801125977

SPBC1773.14

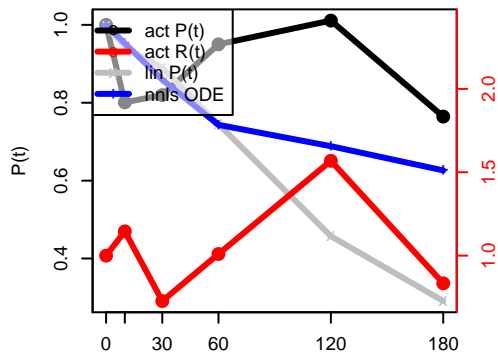

Time (min)  
ks = 0.00471564618254238 kd = 0.0100615530430316

SPBC17G9.07

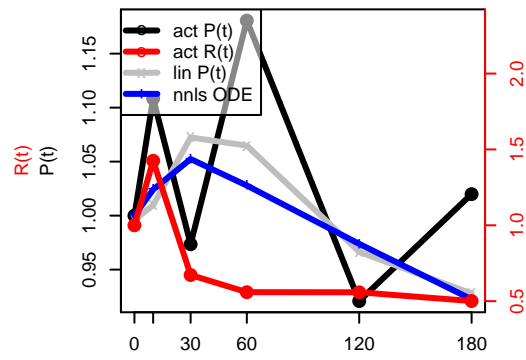

Time (min)  
ks = 0.00519751932565946 kd = 0.00385081766977747

SPBC20F10.05

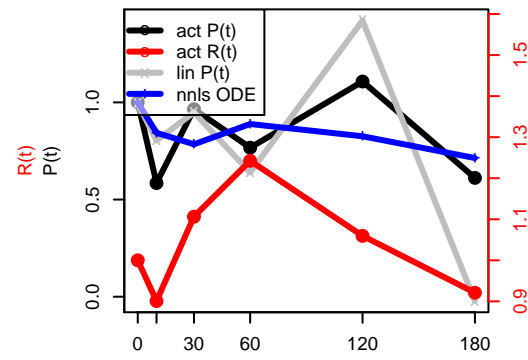

Time (min)  
ks = 0.0583746606198703 kd = 0.0775725323969092

SPBC216.05

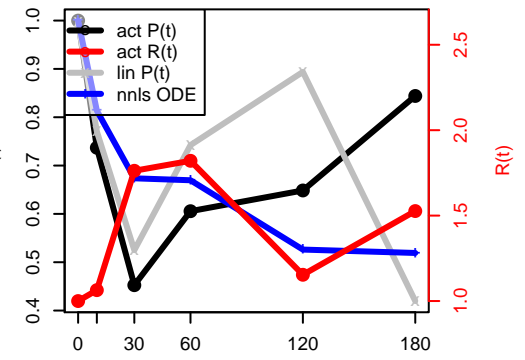

Time (min)  
ks = 0.0133265053047842 kd = 0.0358961232313492

SPBC24C6.11

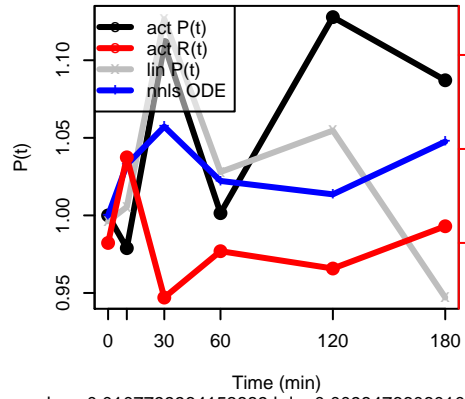

SPBC2D10.10c

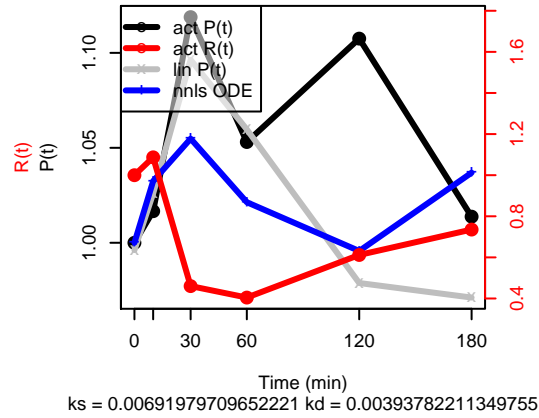

SPBC3D6.06c

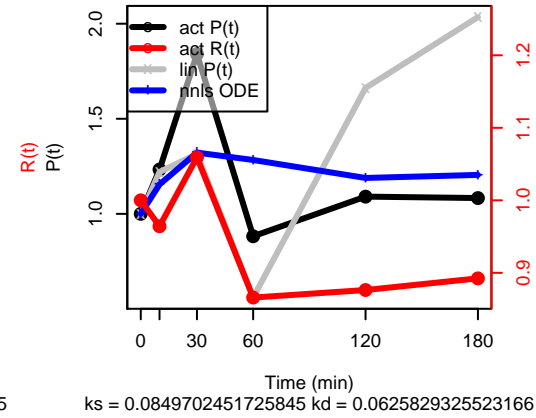

SPBC3E7.07c

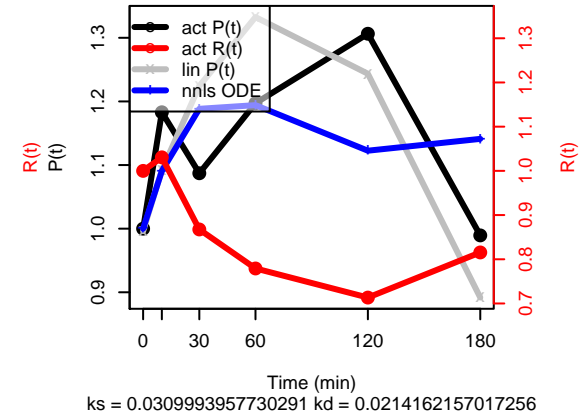

SPBC3F6.04c

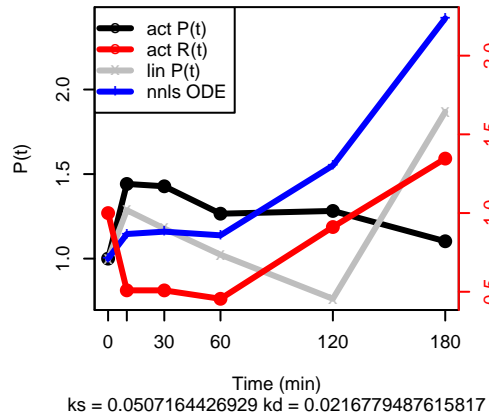

SPBC9B6.04c

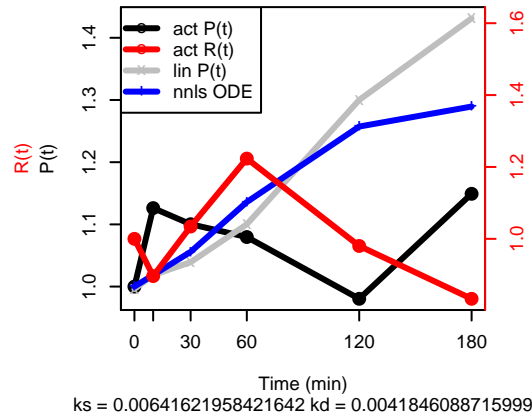

SPBC9B6.05c

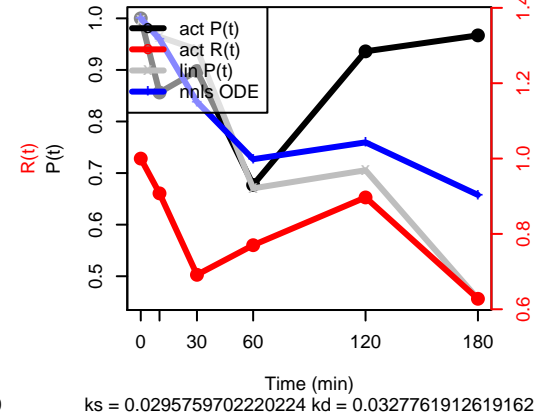

SPBP8B7.18c

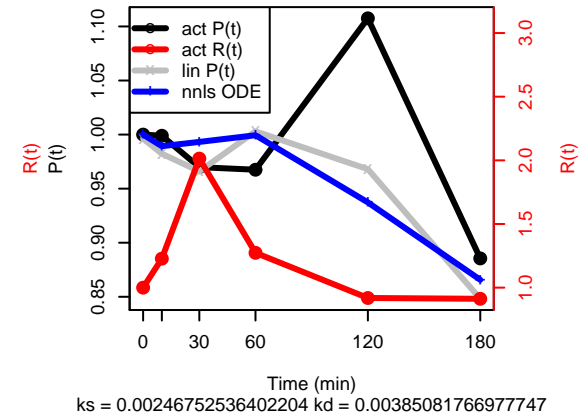

SPCC1442.06

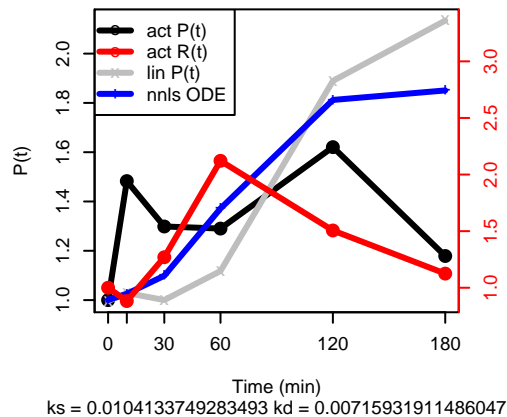

SPCC1672.06c

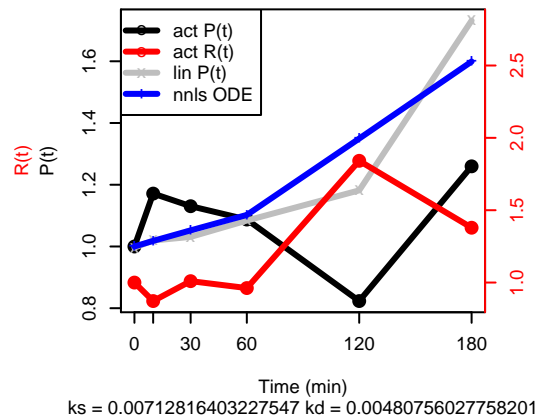

SPCC338.05c

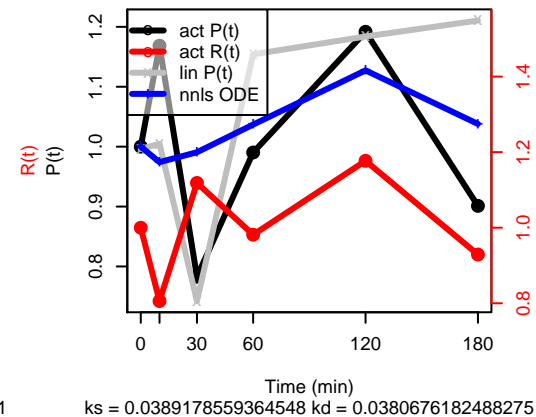

SPCC4G3.13c

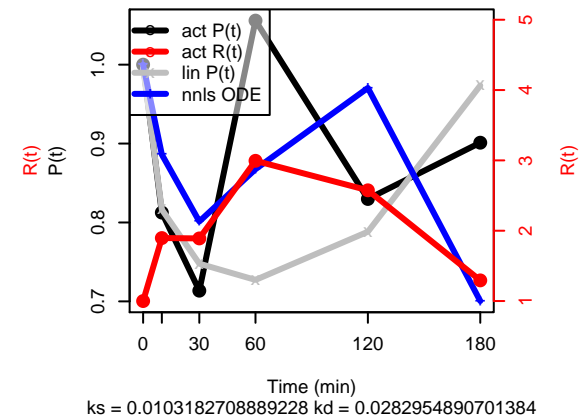

SPCC4G3.17

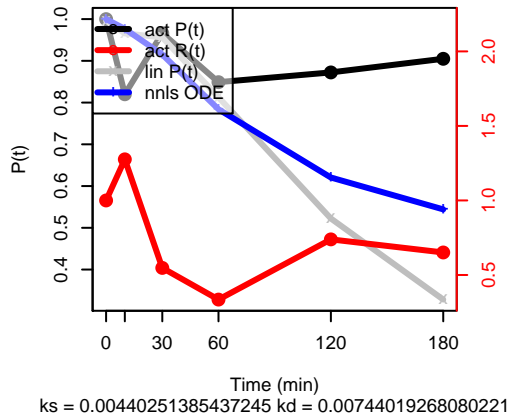

SPCC550.15c

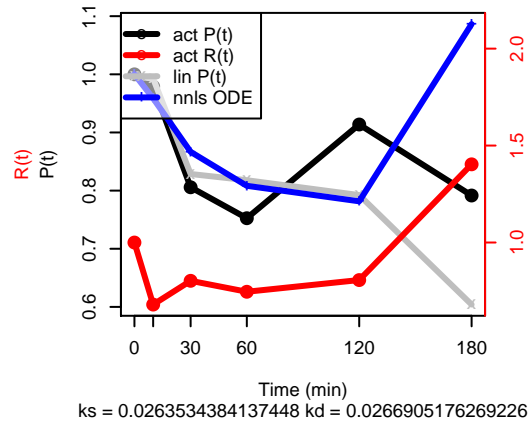

SPCC622.13c

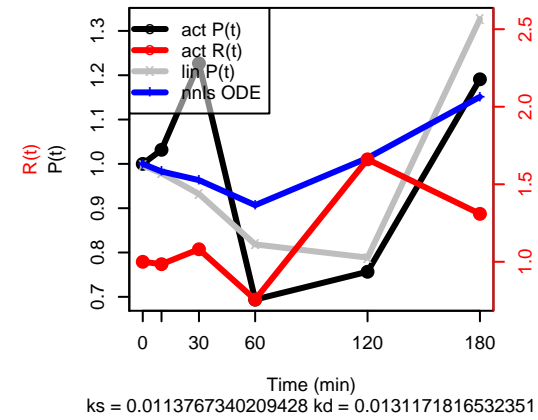

SPCC825.03c

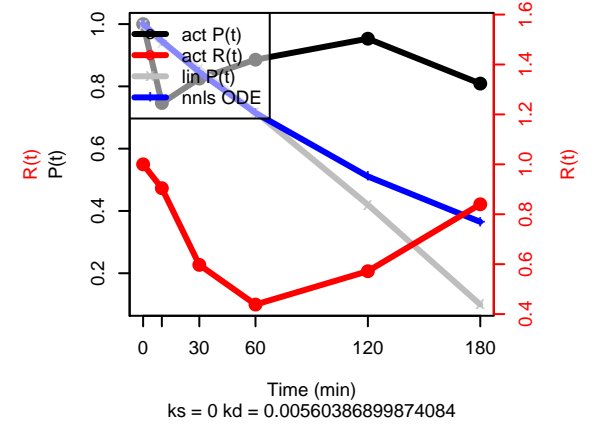

SPCC962.03c

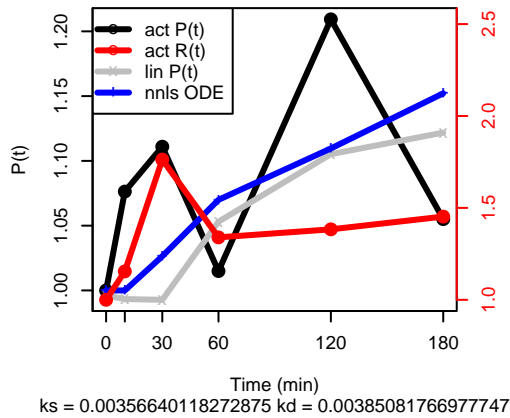

SPAC1006.01

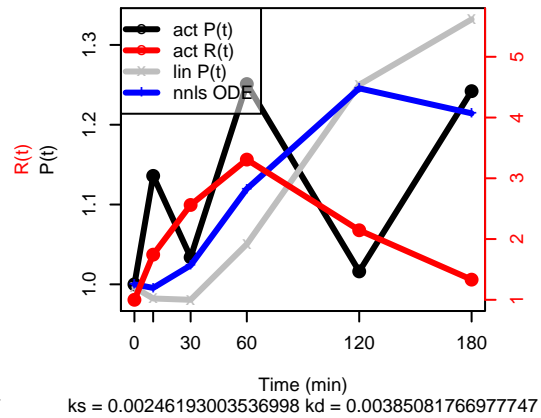

SPAC10F6.10

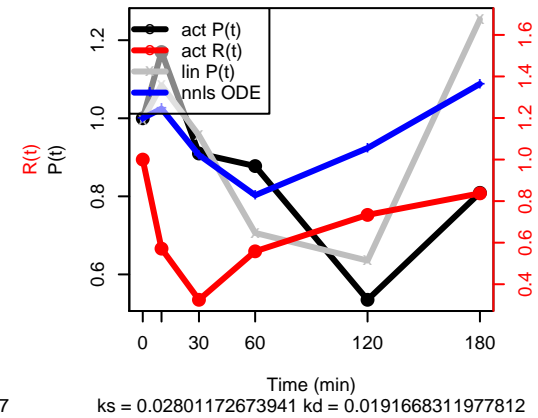

SPAC11D3.15

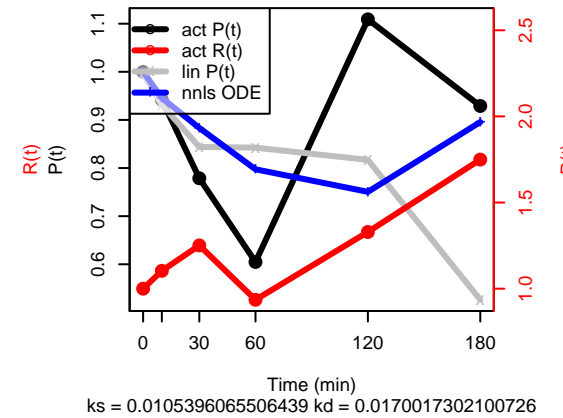

SPAC12G12.03

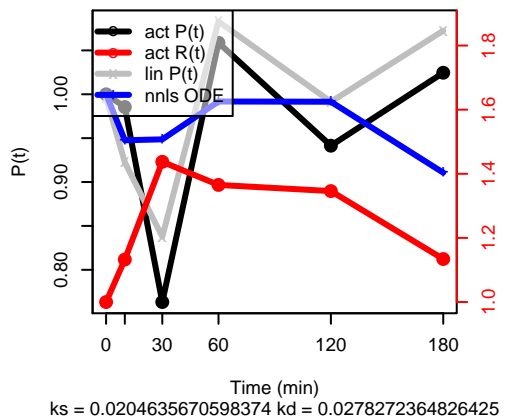

SPAC1420.02c

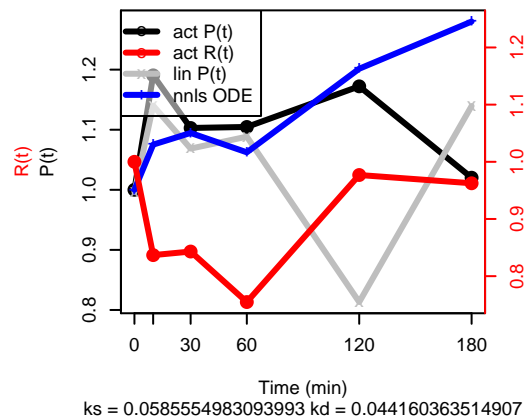

SPAC144.02

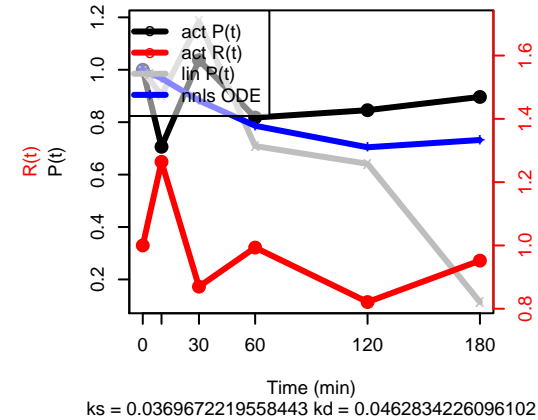

SPAC1687.15

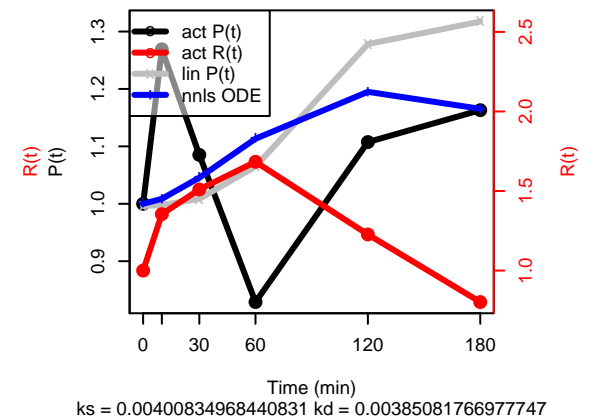

SPAC17C9.06

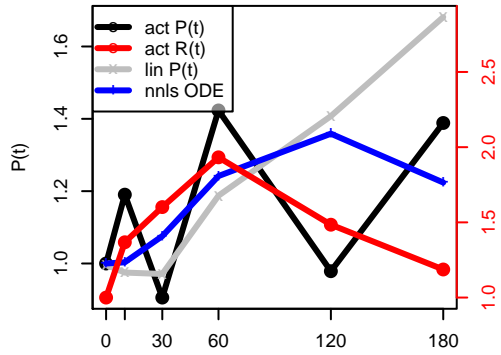

Time (min)  
ks = 0.0131232658593653 kd = 0.0152421399791961

SPAC17C9.09c

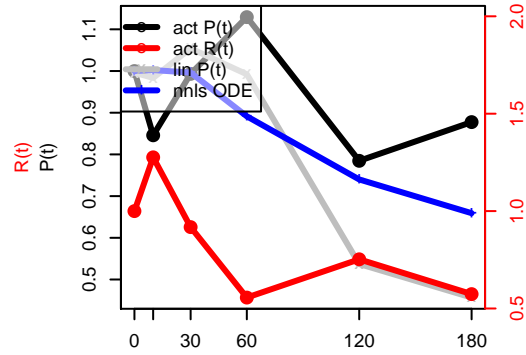

Time (min)  
ks = 0.0107282413196495 kd = 0.0119975560716759

SPAC17H9.09c

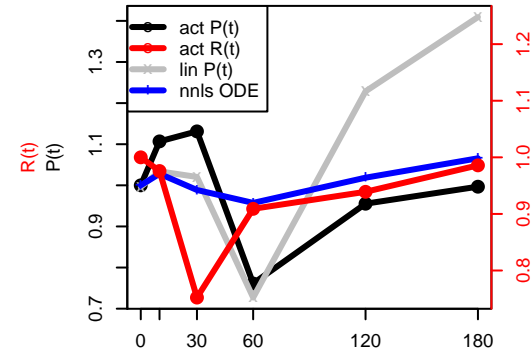

Time (min)  
ks = 0.037087155639525 kd = 0.0333065105680015

SPAC18B11.02c

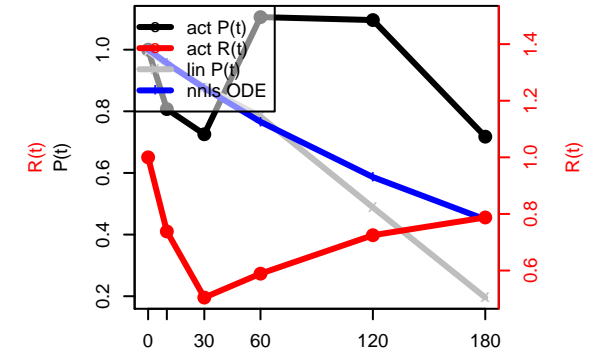

Time (min)  
ks = 0 kd = 0.00444660940193459

SPAC19B12.04

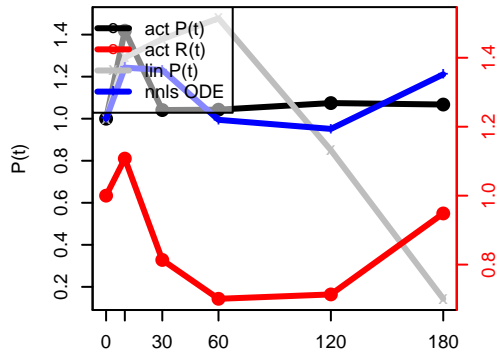

Time (min)  
ks = 0.12046937352251 kd = 0.0909707576390404

SPAC22A12.07c

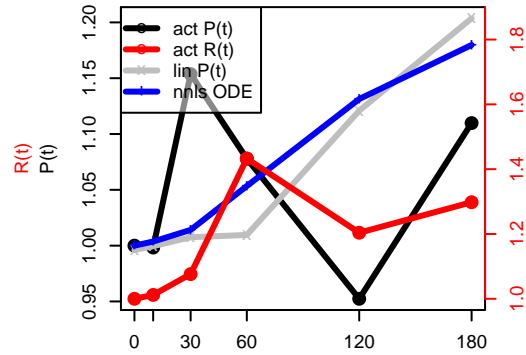

Time (min)  
ks = 0.00419190358502403 kd = 0.00385081766977747

SPAC23C4.05c

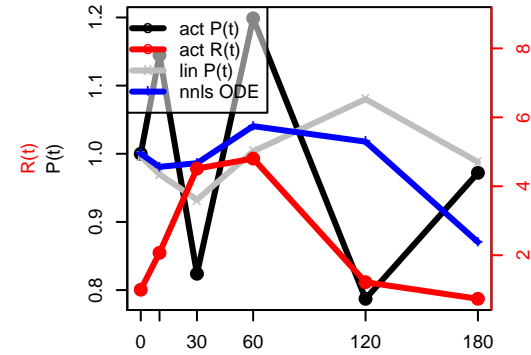

Time (min)  
ks = 0.00122691583066152 kd = 0.00385081766977747

SPAC23D3.04c

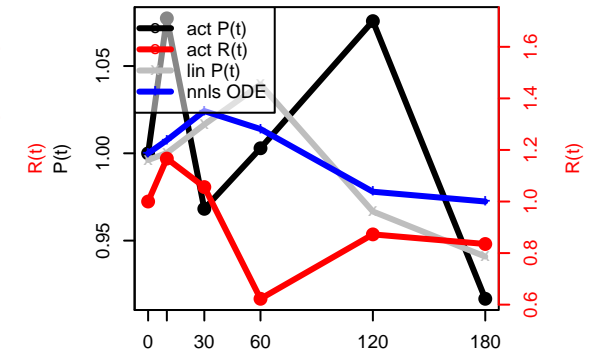

Time (min)  
ks = 0.00425456624194144 kd = 0.00385081766977747

SPAC23D3.08

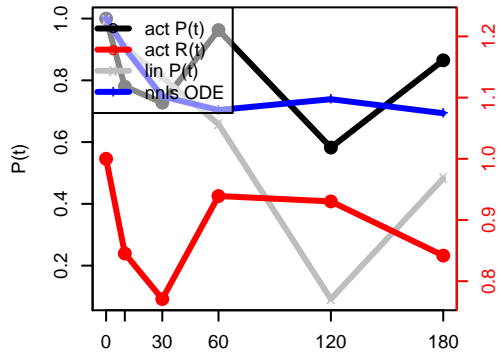

Time (min)  
ks = 0.0337290321226168 kd = 0.0427044363706206

SPAC23G3.12c

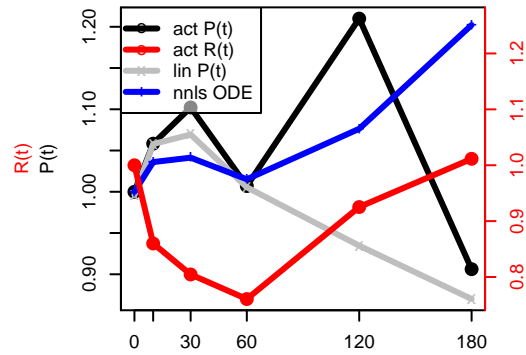

Time (min)  
ks = 0.030001041002653 kd = 0.0238319548831384

SPAC25A8.01c

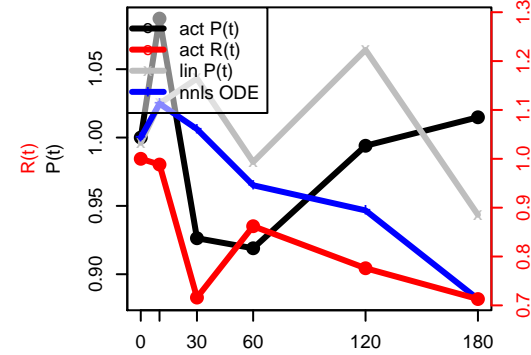

Time (min)  
ks = 0.022312904879419 kd = 0.0194434871305907

SPAC27D7.14c

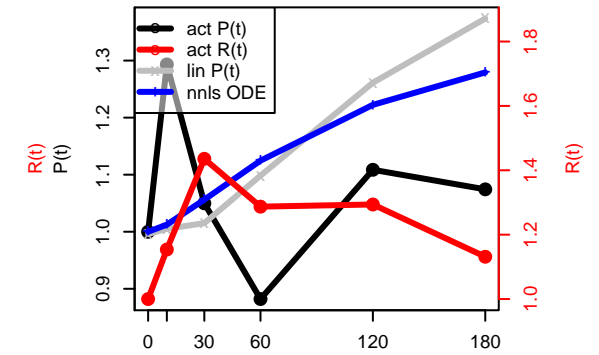

Time (min)  
ks = 0.00474817693750894 kd = 0.00385081766977747

SPAC2F7.11

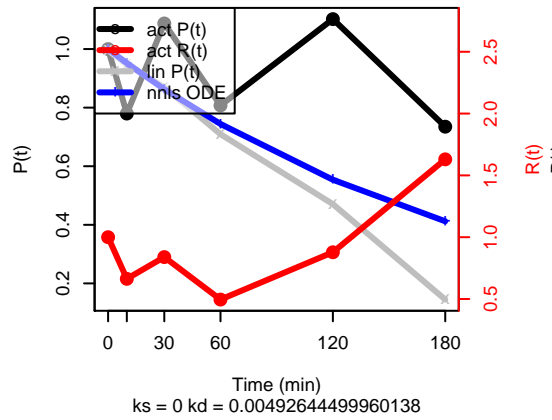

SPAC31A2.07c

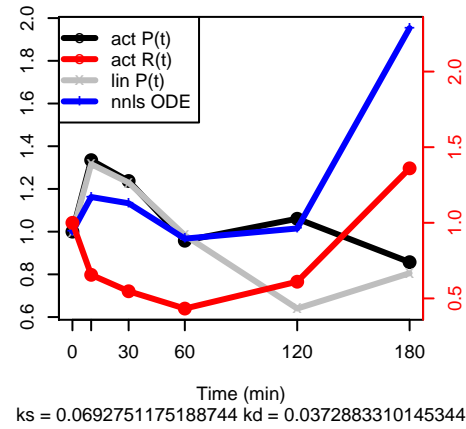

SPAC31G5.19

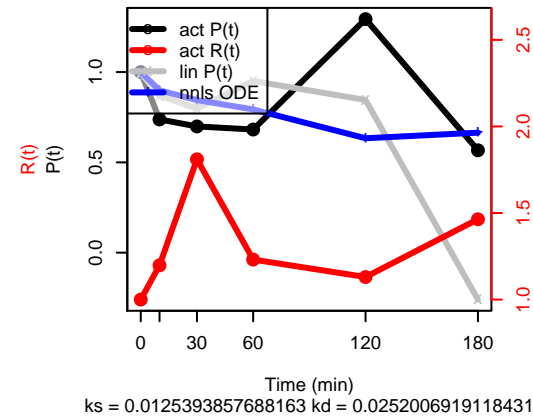

SPAC3F10.11c

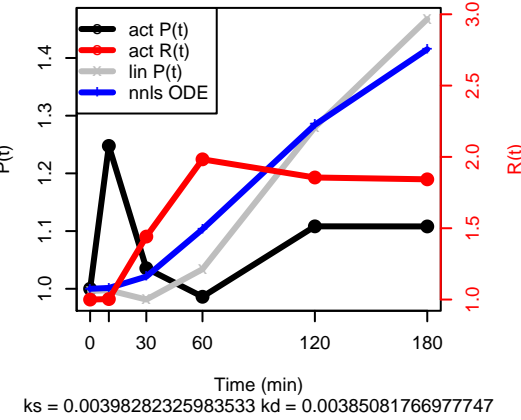

SPAC4F8.02c

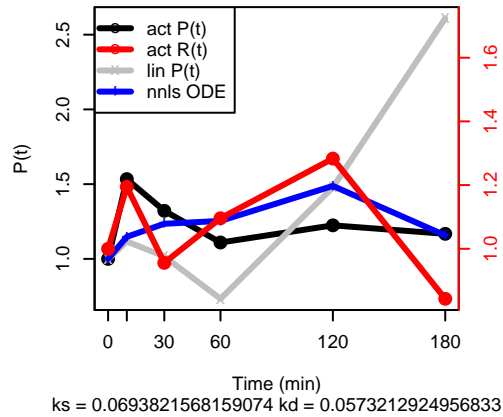

SPAC4G9.09c

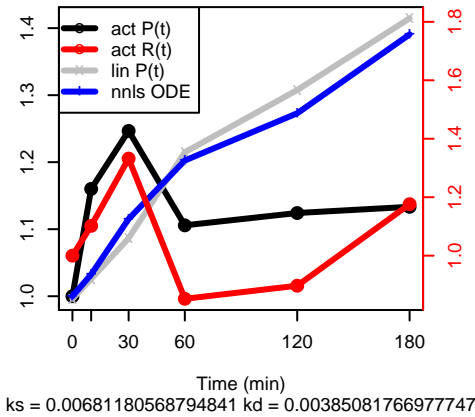

SPAC57A7.07c

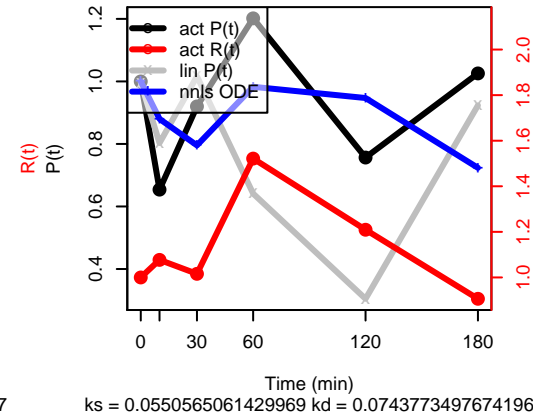

SPAC630.08c

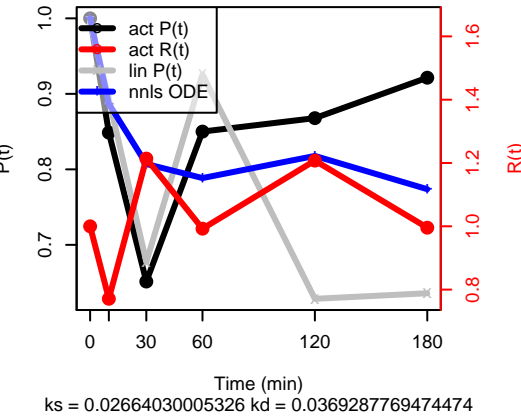

SPAC637.08

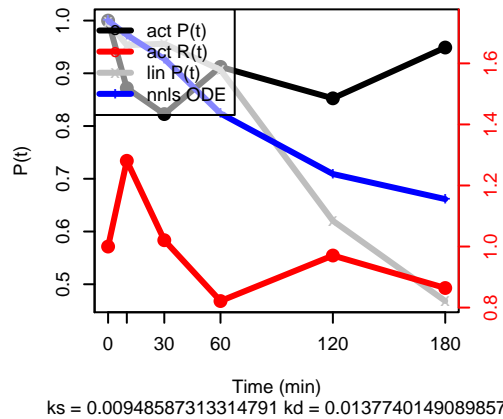

SPAC823.05c

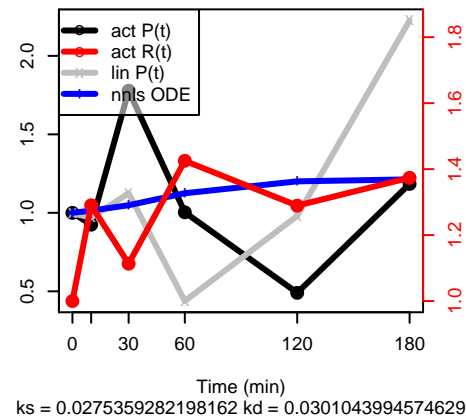

SPAC823.08c

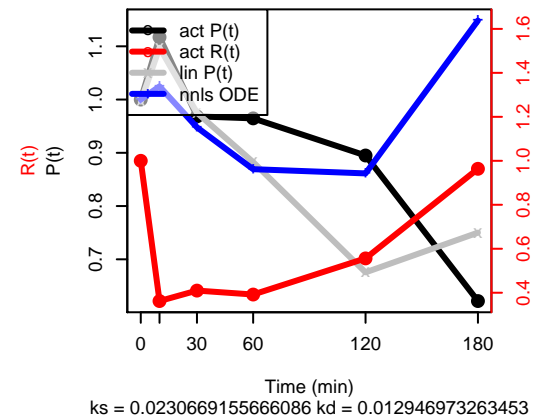

SPAC890.07c

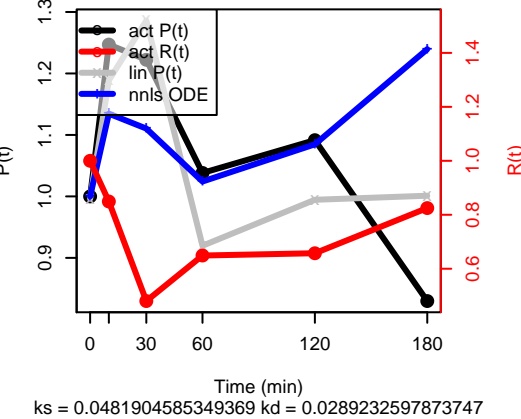



SPAC890.08

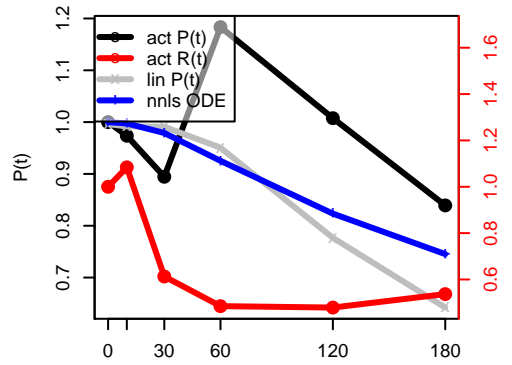

Time (min)  
ks = 0.00342015010892293 kd = 0.00385081766977747

SPAC8C9.12c

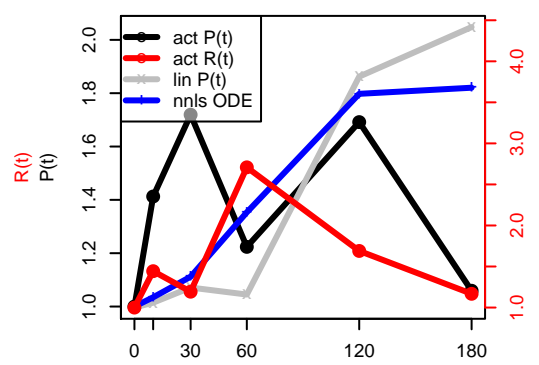

Time (min)  
ks = 0.00766080245675536 kd = 0.00582343178359534

SPAC922.04

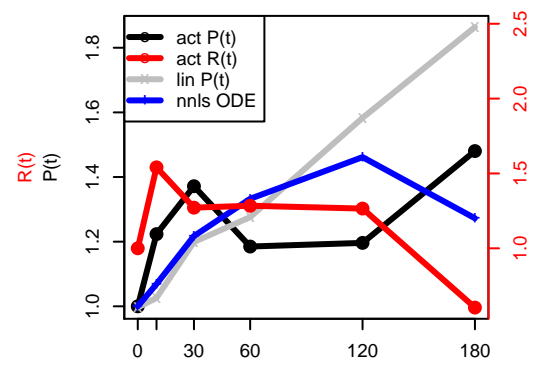

Time (min)  
ks = 0.0156315869412688 kd = 0.0126237921716102

SPAPJ696.02

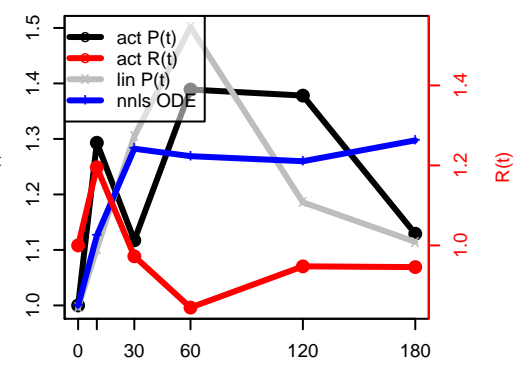

Time (min)  
ks = 0.0367594590404088 kd = 0.0261408473057472

SPBC1198.05

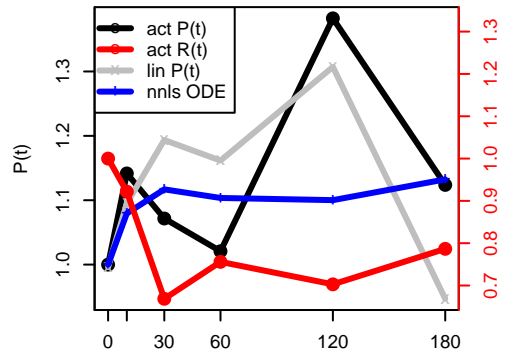

Time (min)  
ks = 0.0289400707580761 kd = 0.0190543202731817

SPBC1215.02c

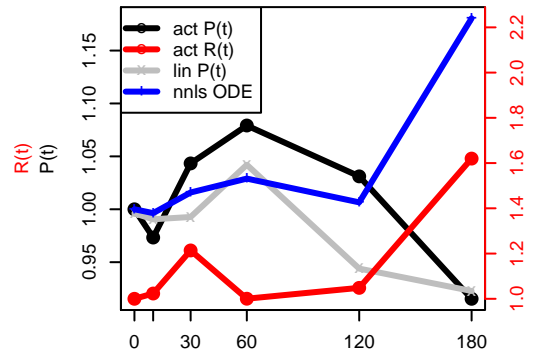

Time (min)  
ks = 0.013077980892098 kd = 0.0136389062247978

SPBC16C6.08c

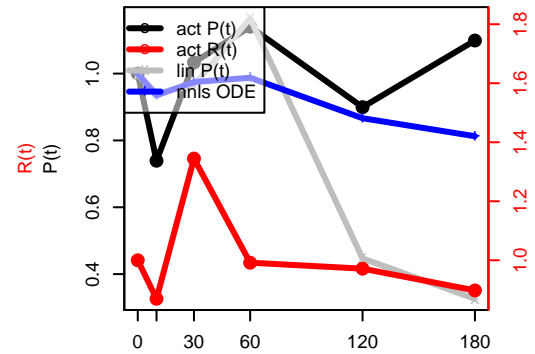

Time (min)  
ks = 0.0392959214331818 kd = 0.0446810131255721

SPBC16E9.09c

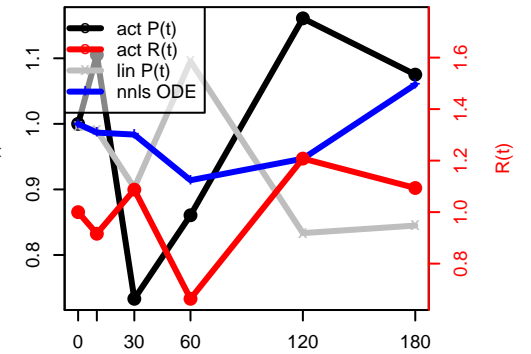

Time (min)  
ks = 0.0194408611418237 kd = 0.0200621123875969

SPBC16G5.04

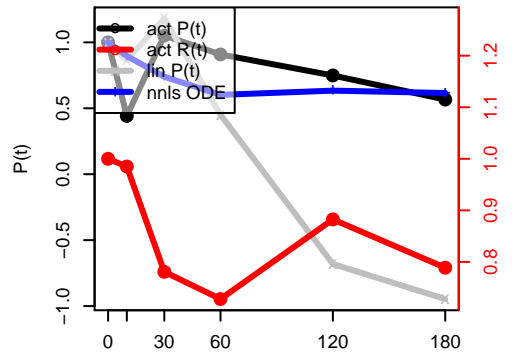

Time (min)  
ks = 0.0394368669935473 kd = 0.0523873114298812

SPBC1778.08c

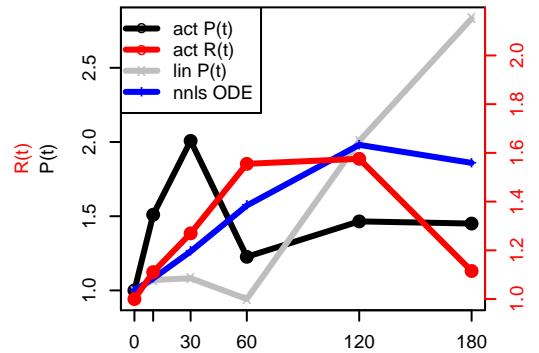

Time (min)  
ks = 0.0264290812858942 kd = 0.0190393265371065

SPBC17G9.02c

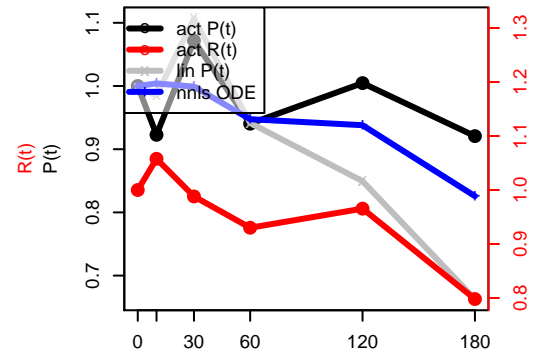

Time (min)  
ks = 0.0521560564320934 kd = 0.0532203720910209

SPBC19F5.05c

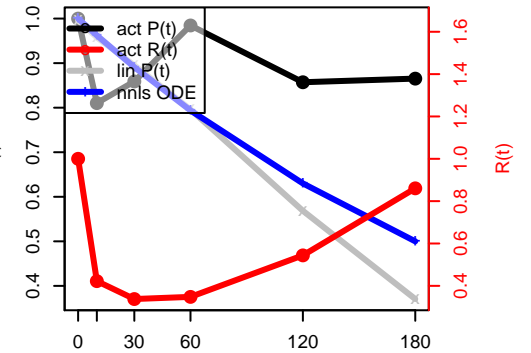

Time (min)  
ks = 0 kd = 0.00385081766977747

SPBC19G7.15

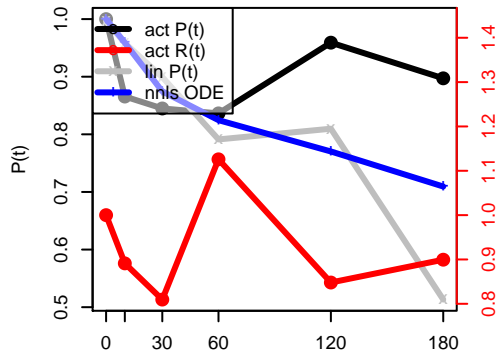

Time (min)  
ks = 0.0119551839865654 kd = 0.0157229984426013

SPBC23G7.06c

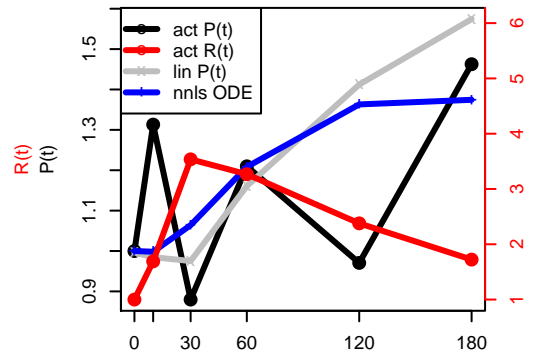

Time (min)  
ks = 0.00270761816325078 kd = 0.00385081766977747

SPBC26H8.06

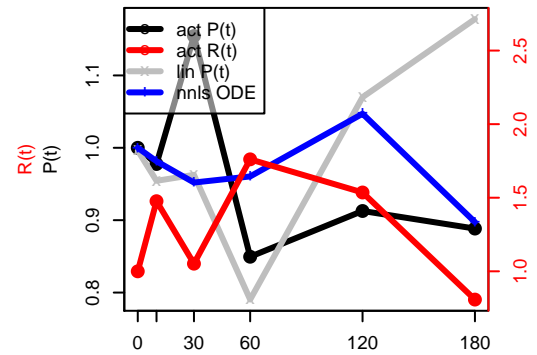

Time (min)  
ks = 0.00900428473754538 kd = 0.0131801920693694

SPBC26H8.07c

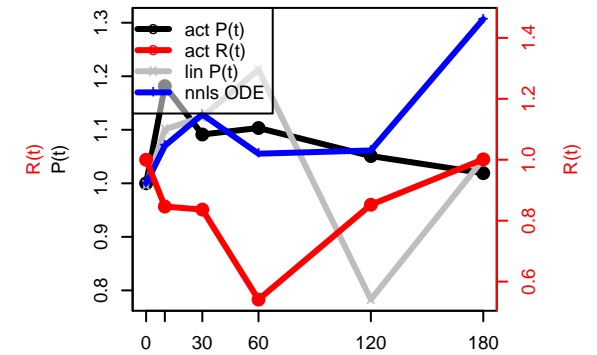

Time (min)  
ks = 0.0331954502943647 kd = 0.0227637643100982

SPBC365.05c

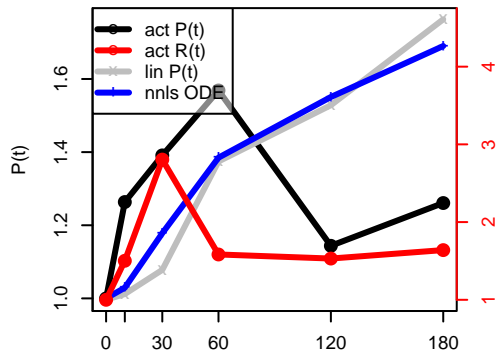

Time (min)  
ks = 0.00543431255194605 kd = 0.00385081766977747

SPBC3B9.07c

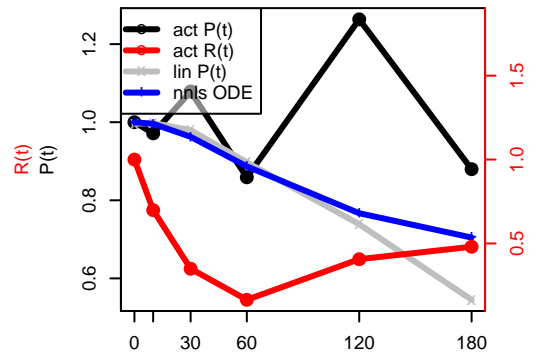

Time (min)  
ks = 0.00403637588909935 kd = 0.00385081766977747

SPBC3B9.18c

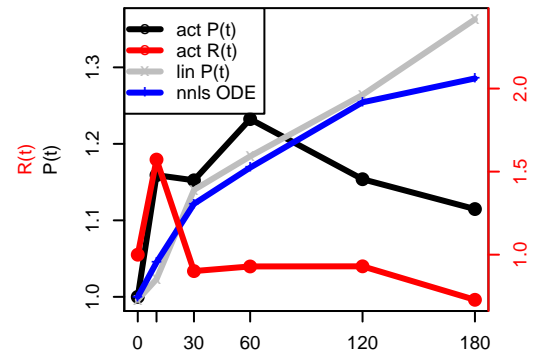

Time (min)  
ks = 0.00654732666720067 kd = 0.00385081766977747

SPBC3D6.08c

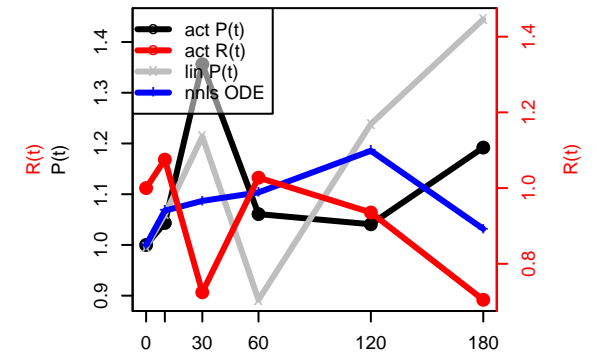

Time (min)  
ks = 0.0307397658997176 kd = 0.0243318708032925

SPBC4.06

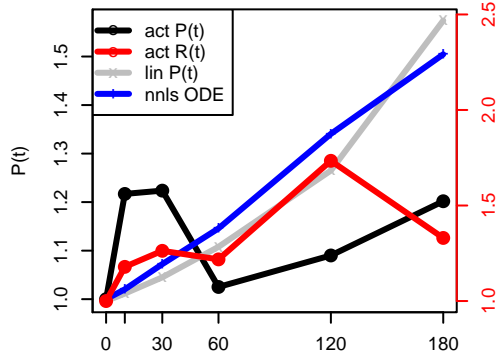

Time (min)  
ks = 0.0053914858428534 kd = 0.00385081766977747

SPBC405.07

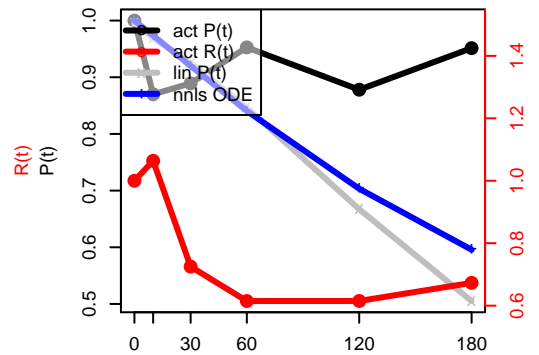

Time (min)  
ks = 0.00110591120414771 kd = 0.00385081766977747

SPBC4F6.18c

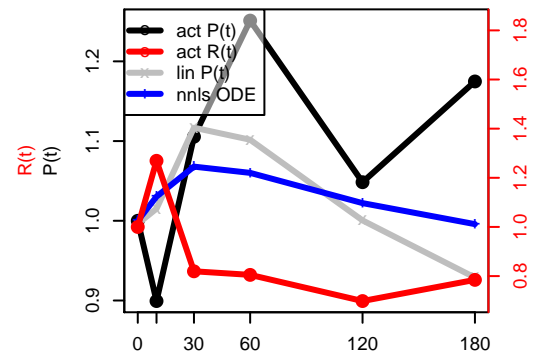

Time (min)  
ks = 0.009112010682558 kd = 0.00721030530165183

SPBC557.04

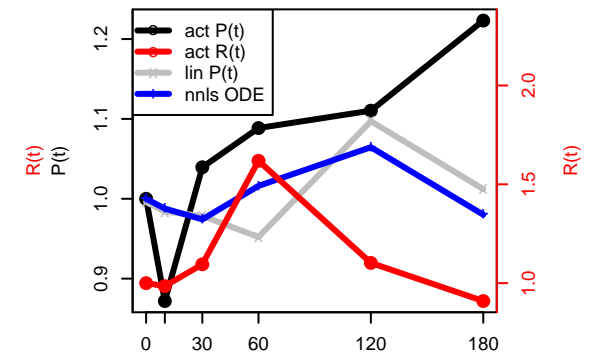

Time (min)  
ks = 0.00707370096707339 kd = 0.0082995222478869

SPBC646.04

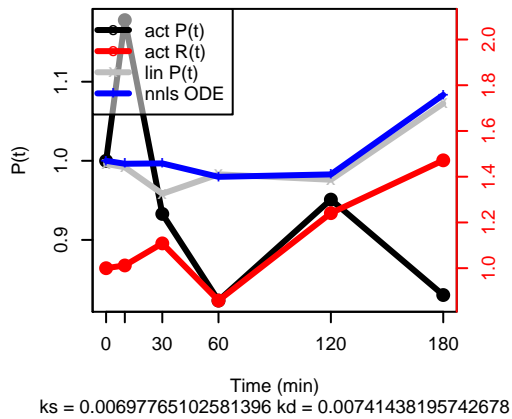

SPBC713.12

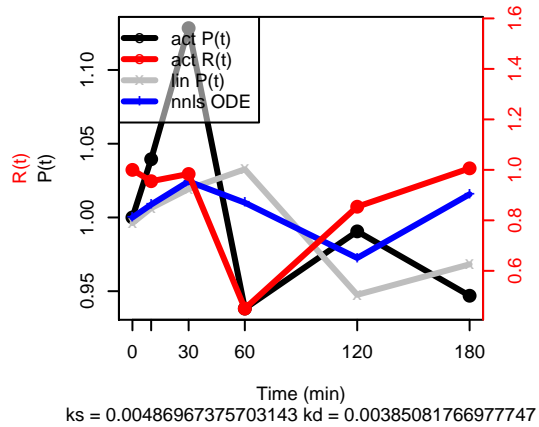

SPBC947.01

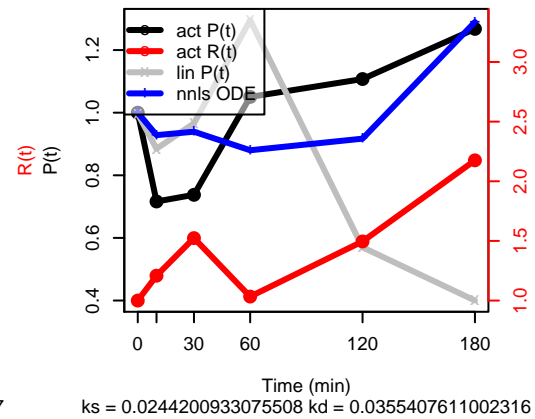

SPBP23A10.15c

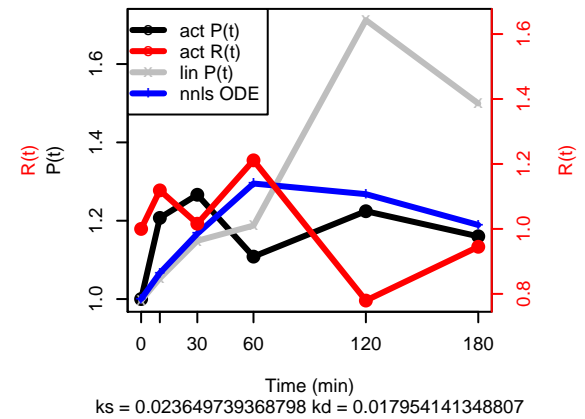

SPCC1494.07

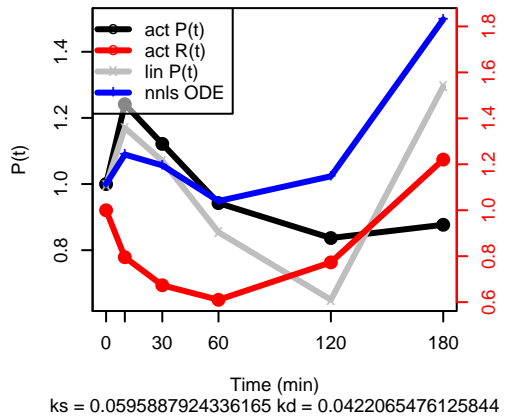

SPCC1672.02c

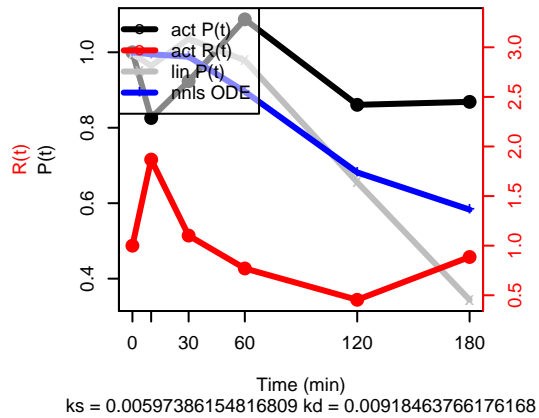

SPCC1682.02c

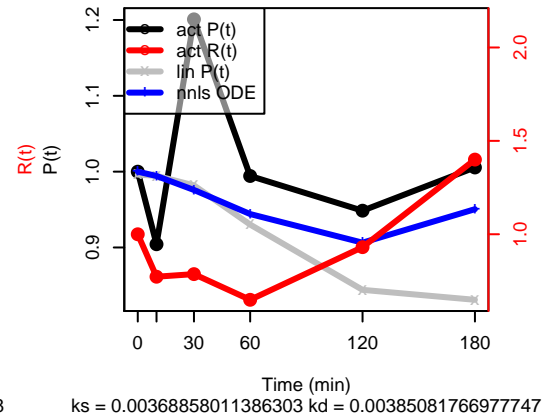

SPCC1682.04

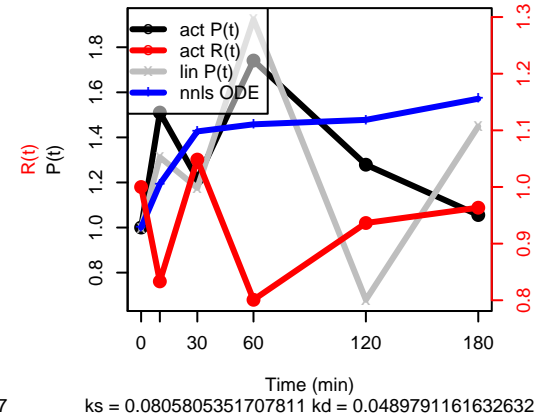

SPCC16C4.11

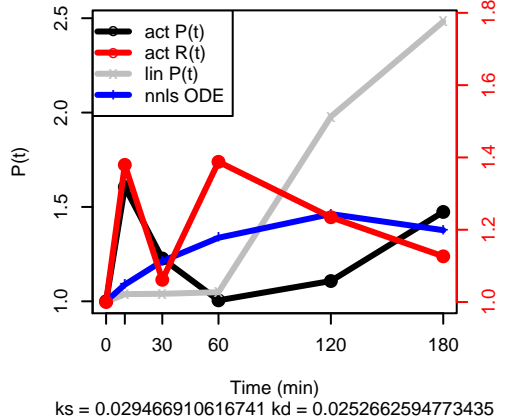

SPCC1739.14

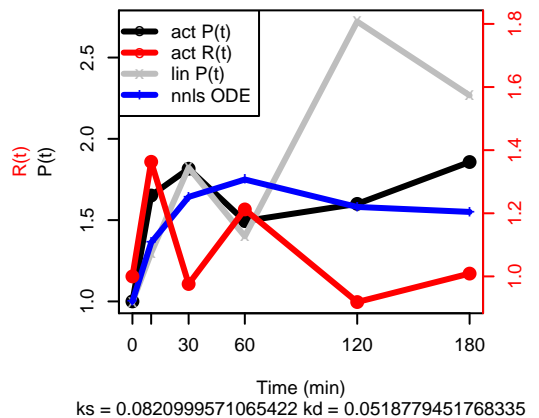

SPCC1840.01c

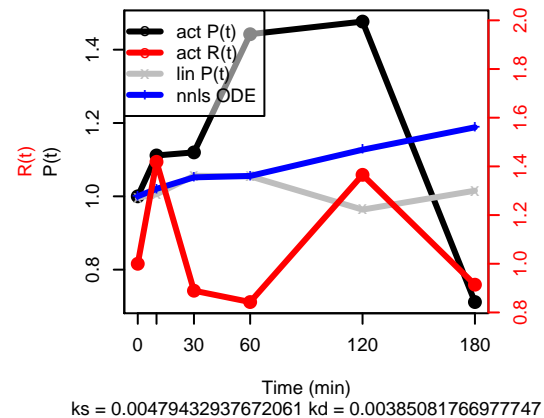

SPCC330.08

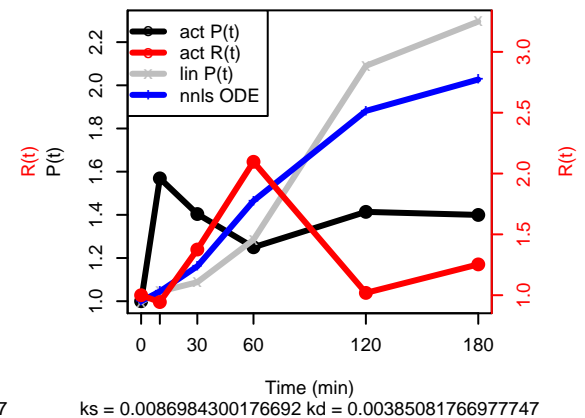

SPCC63.02c

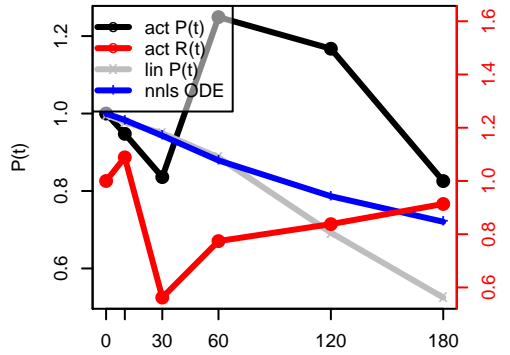

Time (min)  
ks = 0.00203009151054816 kd = 0.00385081766977747

SPCC962.04

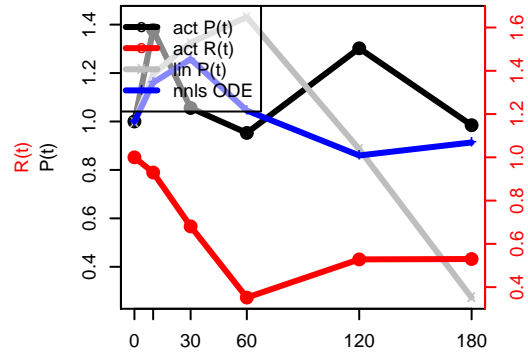

Time (min)  
ks = 0.0467033306892603 kd = 0.0267828288528192

SPAC1142.06

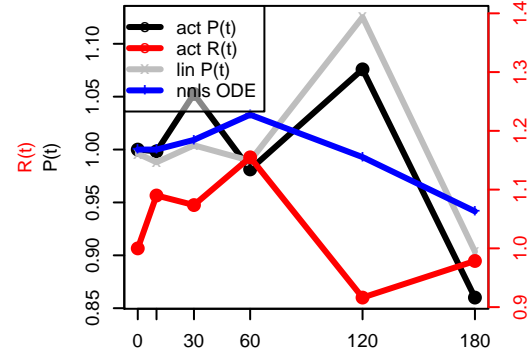

Time (min)  
ks = 0.0176491273890722 kd = 0.0184667795896829

SPAC11D3.02c

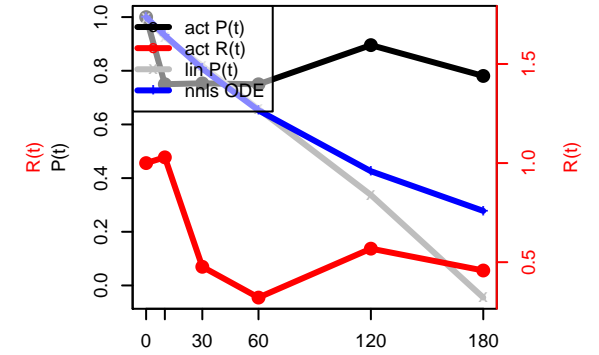

Time (min)  
ks = 0 kd = 0.00711669281419105

SPAC12B10.07

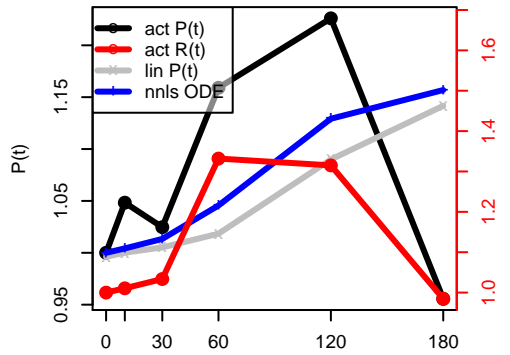

Time (min)  
ks = 0.0042455688844237 kd = 0.00385081766977747

SPAC12G12.13c

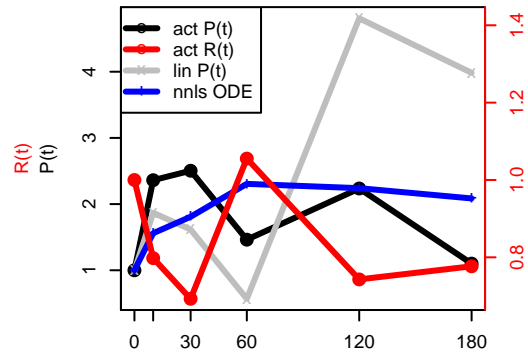

Time (min)  
ks = 0.139857860554208 kd = 0.0526216697514702

SPAC13G7.08c

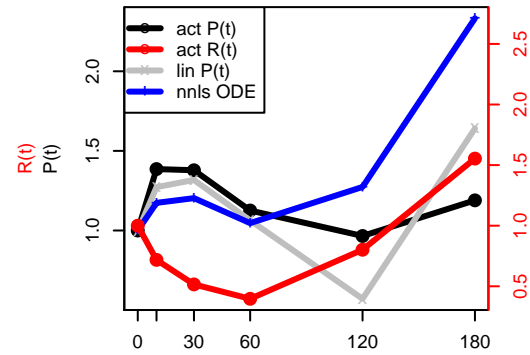

Time (min)  
ks = 0.053925903013032 kd = 0.0263090170169245

SPAC1486.10

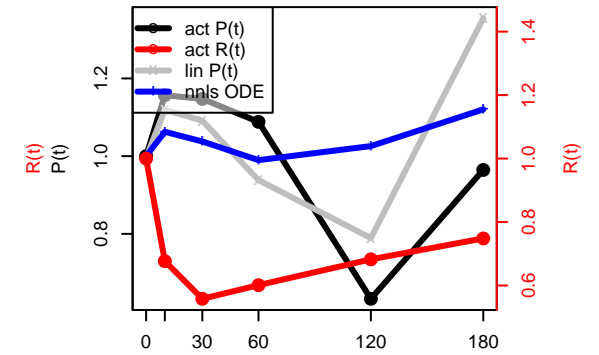

Time (min)  
ks = 0.0326612213544537 kd = 0.0203285040749749

SPAC15E1.04

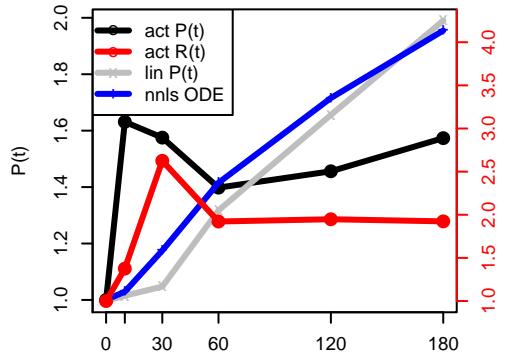

Time (min)  
ks = 0.0057379010243632 kd = 0.00385081766977747

SPAC16E8.07c

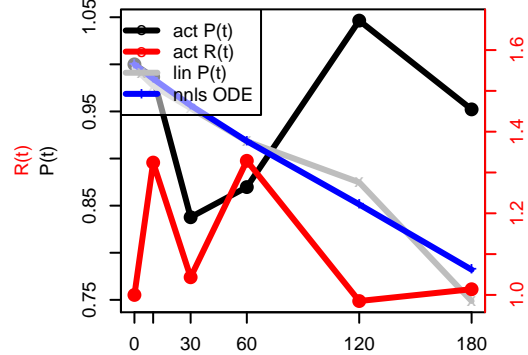

Time (min)  
ks = 0.00199860745624764 kd = 0.00388808981110072

SPAC17A5.13

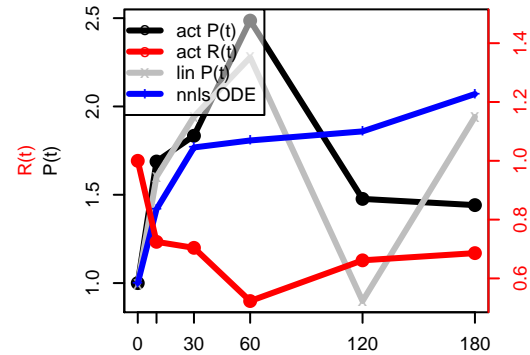

Time (min)  
ks = 0.088415813280507 kd = 0.0278479368561058

SPAC17G8.03c

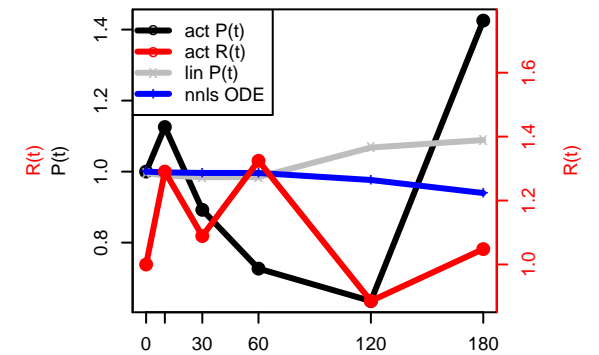

Time (min)  
ks = 0.00316176200904156 kd = 0.00385081766977747

SPAC1805.04

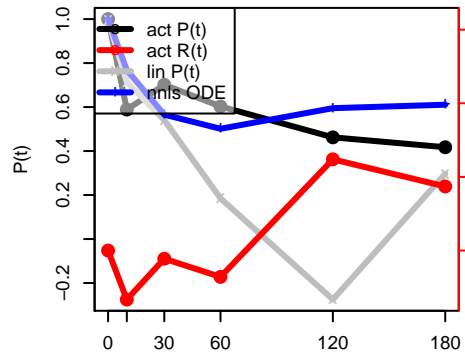

Time (min)  
ks = 0.0287679627012707 kd = 0.0570205221808029

SPAC1834.01

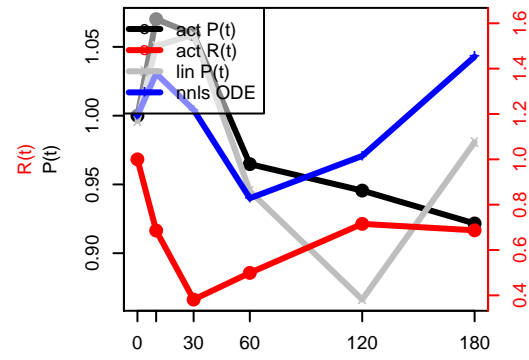

Time (min)  
ks = 0.0141212227617958 kd = 0.00866789800160925

SPAC1834.05

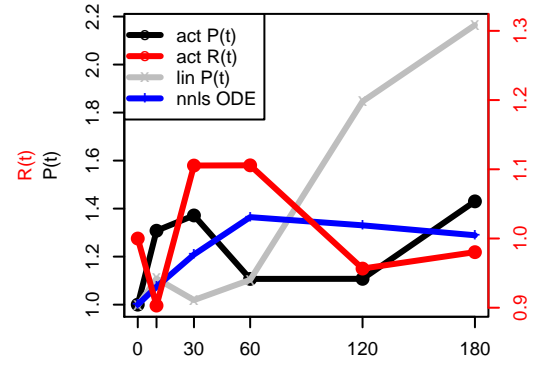

Time (min)  
ks = 0.0473864223344145 kd = 0.0361418519208626

SPAC1B1.03c

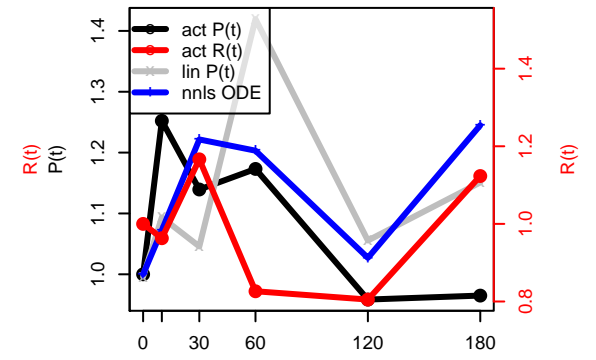

Time (min)  
ks = 0.0504268626170307 kd = 0.0406905344286274

SPAC20G8.06

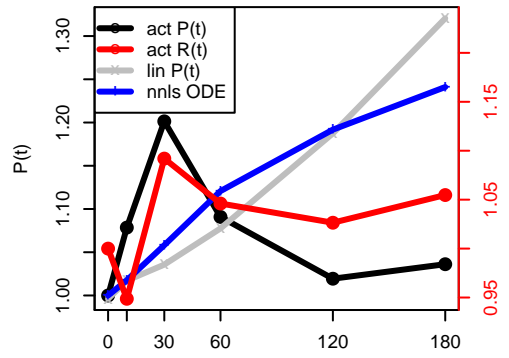

Time (min)  
ks = 0.0103474230352616 kd = 0.00824383989582045

SPAC222.09

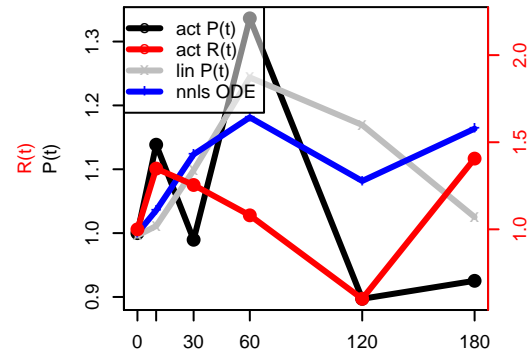

Time (min)  
ks = 0.0126698541916783 kd = 0.0111713641457692

SPAC227.07c

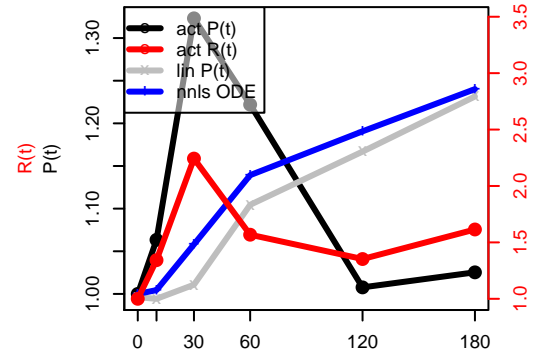

Time (min)  
ks = 0.00366410193627454 kd = 0.00385081766977747

SPAC22F3.10c

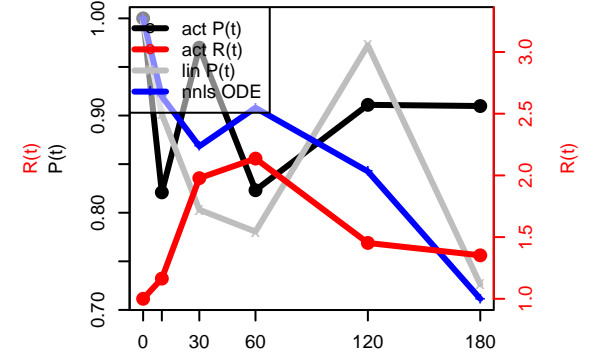

Time (min)  
ks = 0.0083758699328013 kd = 0.0178575578238429

SPAC23C4.15

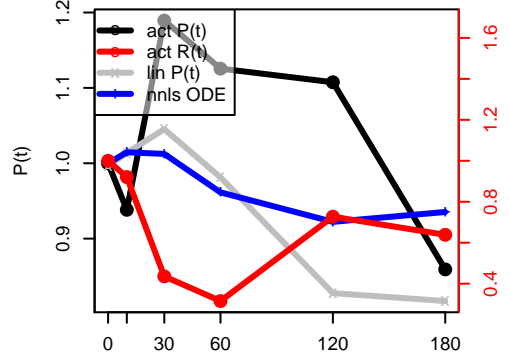

Time (min)  
ks = 0.00562405215753832 kd = 0.00385081766977747

SPAC27E2.02

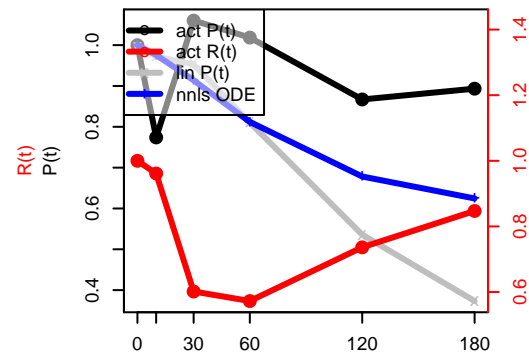

Time (min)  
ks = 0.00476566774278559 kd = 0.00717333579322163

SPAC29B12.04

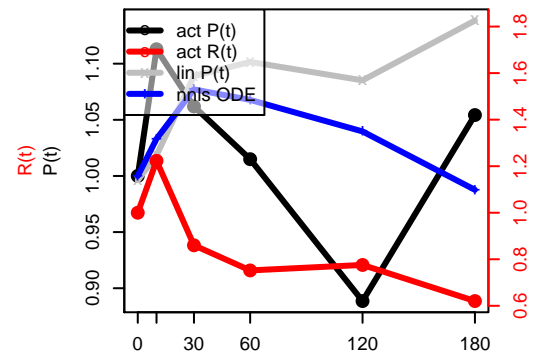

Time (min)  
ks = 0.00961676468760992 kd = 0.00739539529935174

SPAC2G11.06

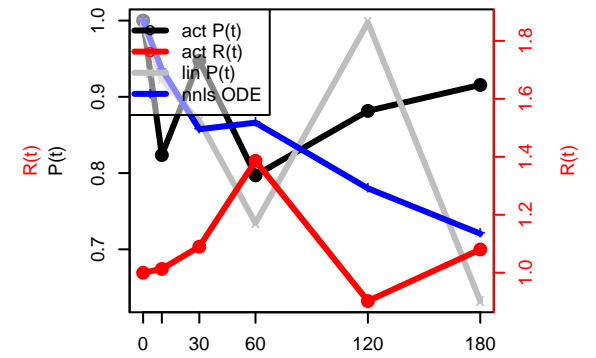

Time (min)  
ks = 0.017331577482189 kd = 0.0246453409397071

SPAC31G5.05c

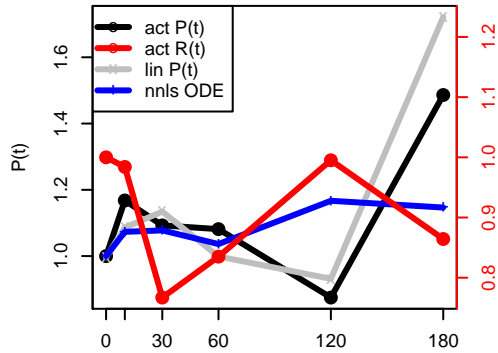

Time (min)  
ks = 0.0440314597739818 kd = 0.0350400419802224

SPAC3F10.04

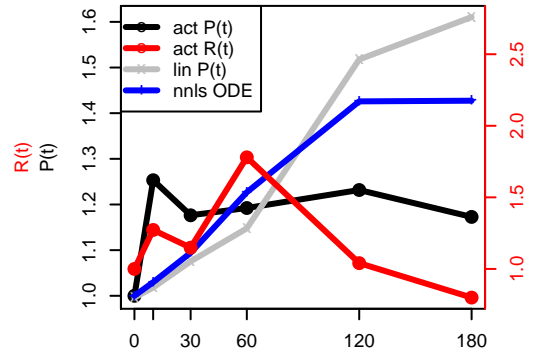

Time (min)  
ks = 0.00604444515011808 kd = 0.00385081766977747

SPAC3H8.02

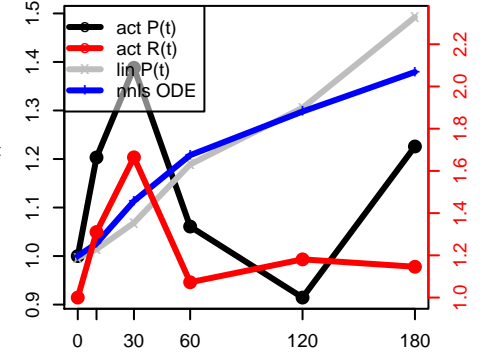

Time (min)  
ks = 0.00562108407408837 kd = 0.00385081766977747

SPAC4A8.16c

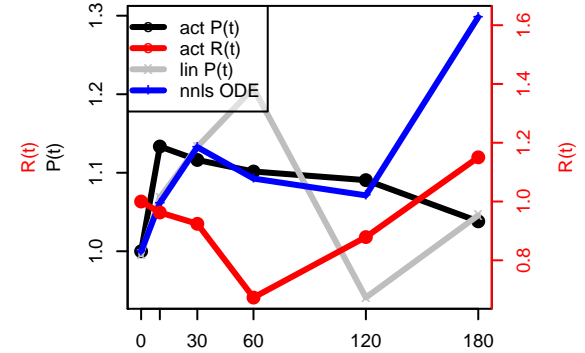

Time (min)  
ks = 0.0289151323166019 kd = 0.0217052949438534

SPAC4D7.08c

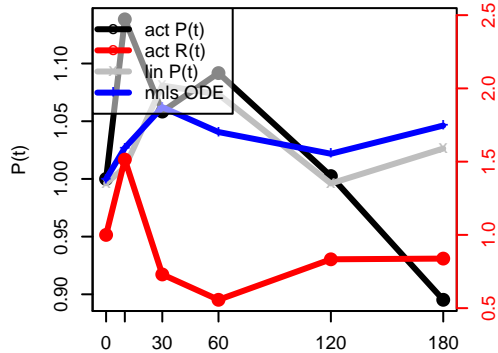

Time (min)  
ks = 0.0052363571821181 kd = 0.00385081766977747

SPAC4F8.03

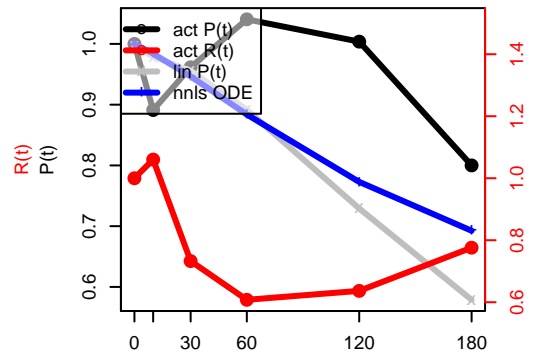

Time (min)  
ks = 0.00213682045565915 kd = 0.00385081766977747

SPAC4G9.03

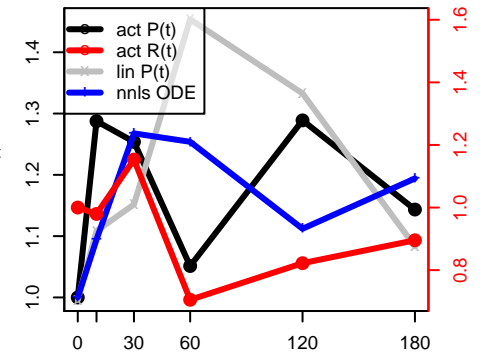

Time (min)  
ks = 0.0399325665917617 kd = 0.0287007468395932

SPAC57A10.11c

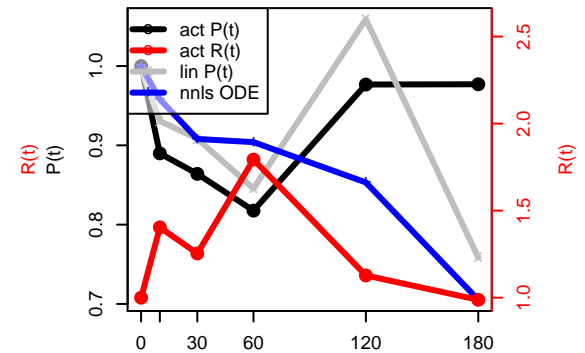

Time (min)  
ks = 0.0091197740700749 kd = 0.0156541956119401

SPAC694.02

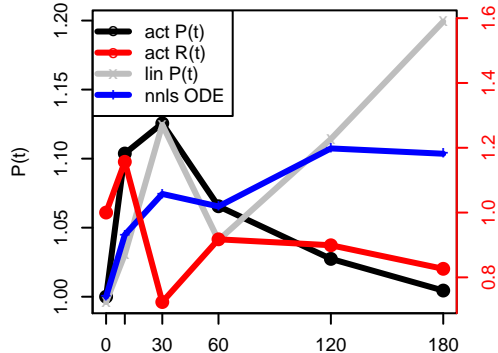

Time (min)  
ks = 0.0166118316098536 kd = 0.0131576290004432

SPAC8F11.10c

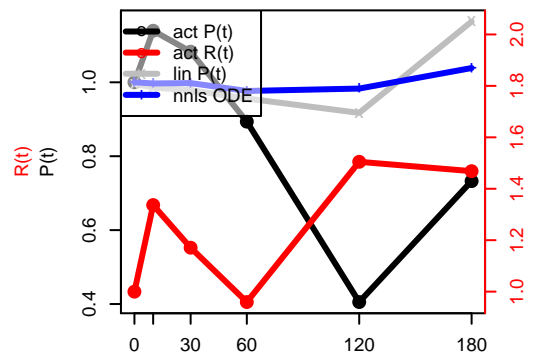

Time (min)  
ks = 0.00412588983541722 kd = 0.00515569424673535

SPAC959.02

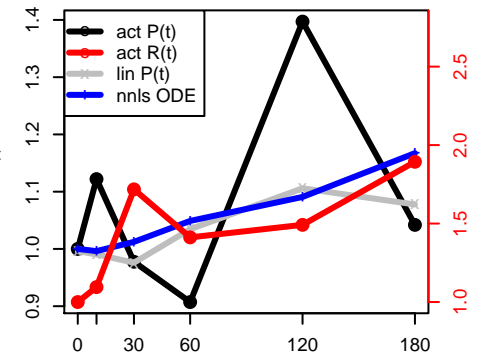

Time (min)  
ks = 0.00337965867424163 kd = 0.00394645296681379

SPAC9E9.04

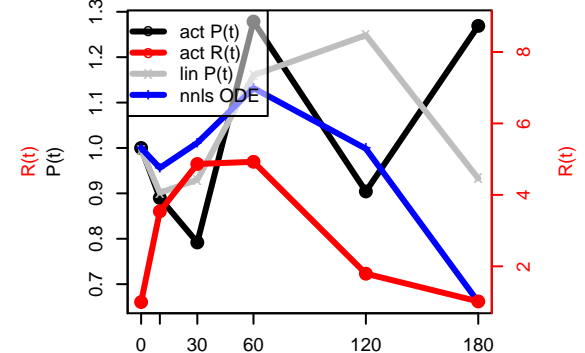

Time (min)  
ks = 0.0037256311107109 kd = 0.0132051568437929

SPAP27G11.10c

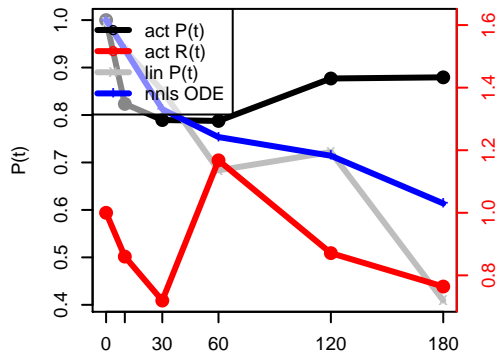

Time (min)  
ks = 0.0138268693385639 kd = 0.0196844863726001

SPBC106.15

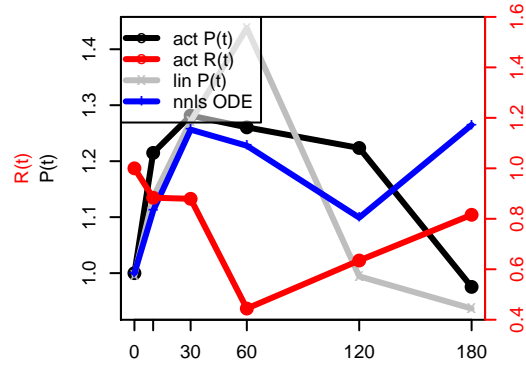

Time (min)  
ks = 0.0305641306538425 kd = 0.0166386948009916

SPBC1198.13c

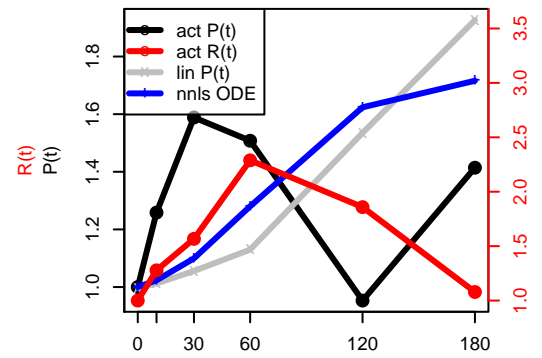

Time (min)  
ks = 0.00548490090628116 kd = 0.00385081766977747

SPBC1289.11

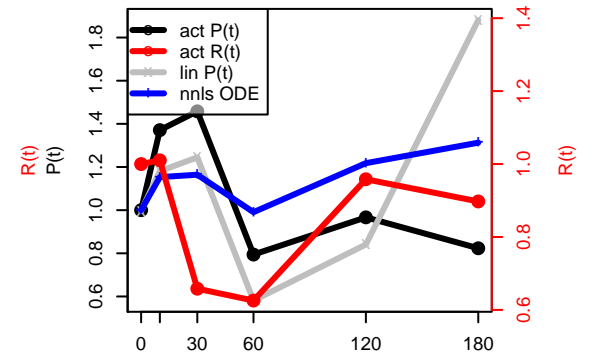

Time (min)  
ks = 0.0613120250950305 kd = 0.0428455099432015

SPBC1347.06c

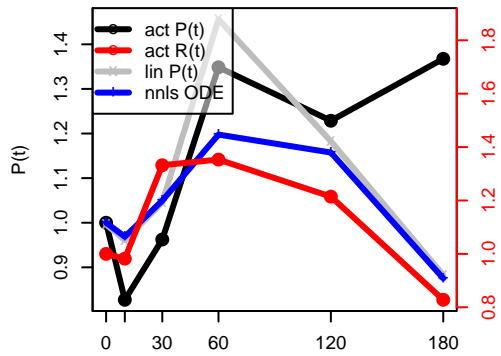

Time (min)  
ks = 0.0462288764431147 kd = 0.0497678004450173

SPBC13E7.08c

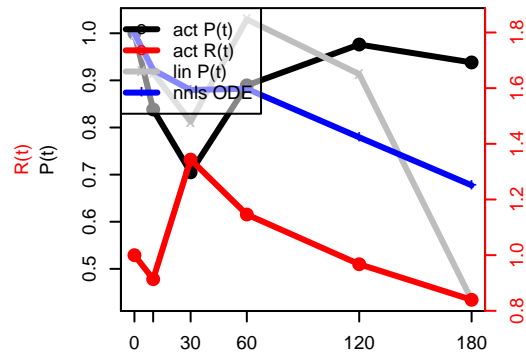

Time (min)  
ks = 0.0201594738806386 kd = 0.028156932964366

SPBC13G1.08c

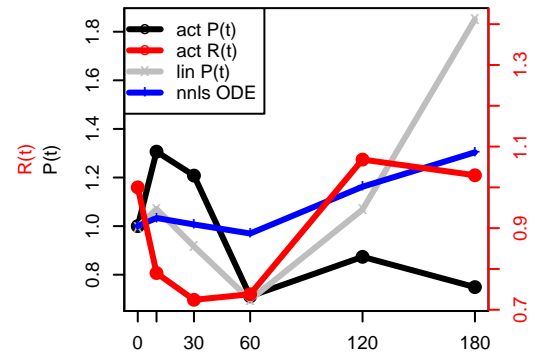

Time (min)  
ks = 0.0337014021834498 kd = 0.0262710587152164

SPBC13G1.09

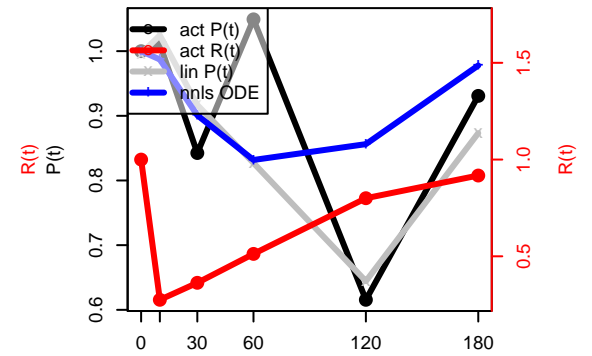

Time (min)  
ks = 0.0112131874997948 kd = 0.00838065069268387

SPBC146.13c

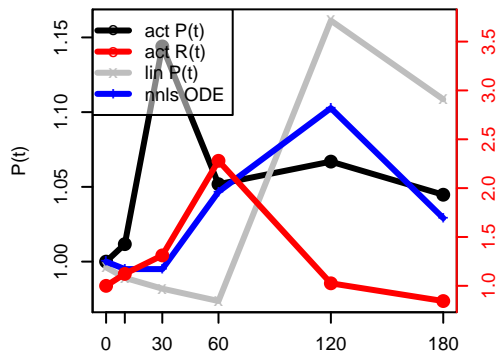

Time (min)  
ks = 0.00314858383156211 kd = 0.00385081766977747

SPBC16A3.01

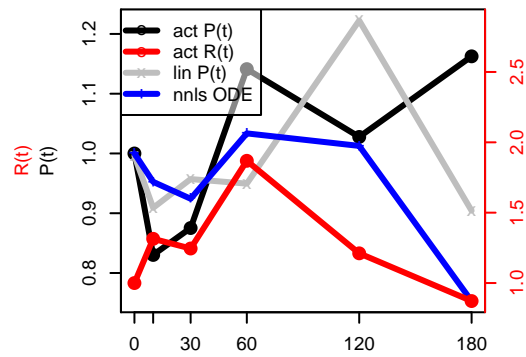

Time (min)  
ks = 0.0199217626330894 kd = 0.028635324968774

SPBC16D10.11c

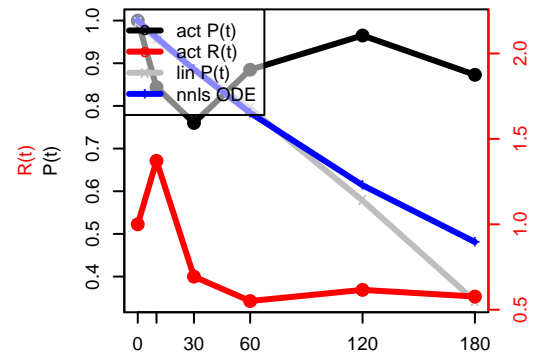

Time (min)  
ks = 0 kd = 0.00406724434996763

SPBC16H5.11c

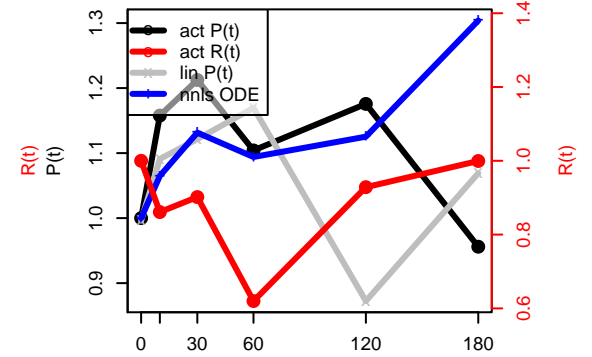

Time (min)  
ks = 0.0318400877002456 kd = 0.022361591964498



SPBC1703.10

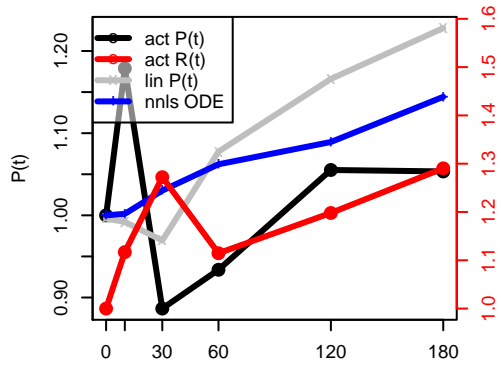

Time (min)  
ks = 0.0103122273614345 kd = 0.0107300200551021

SPBC1734.08

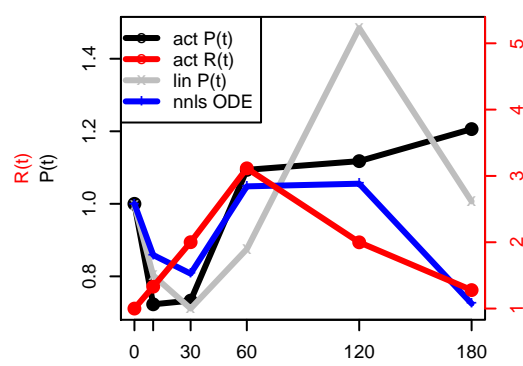

Time (min)  
ks = 0.0154938862250736 kd = 0.034837128666531

SPBC17D1.07c

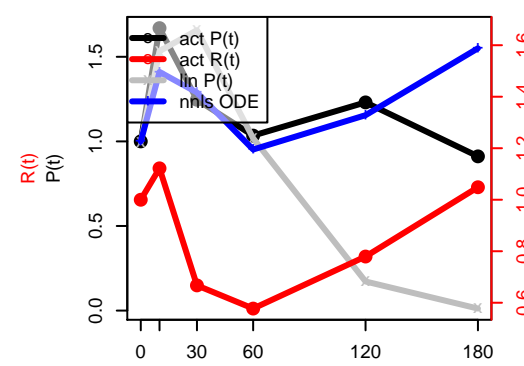

Time (min)  
ks = 0.152499967202079 kd = 0.0987676919970848

SPBC17G9.06c

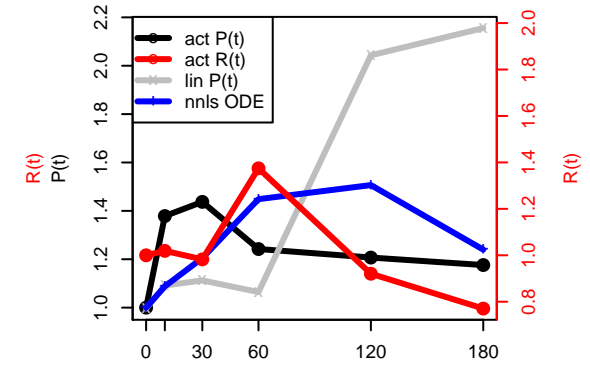

Time (min)  
ks = 0.0336831391828511 kd = 0.024138827135619

SPBC18E5.06

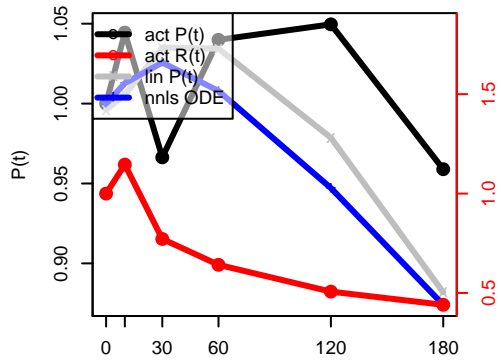

Time (min)  
ks = 0.00479374153274509 kd = 0.00385081766977747

SPBC21C3.14c

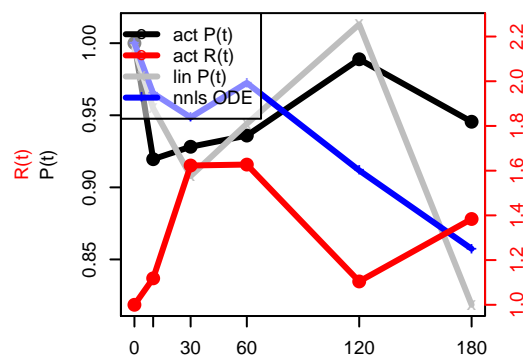

Time (min)  
ks = 0.00724929920646489 kd = 0.0113755445608511

SPBC21C3.15c

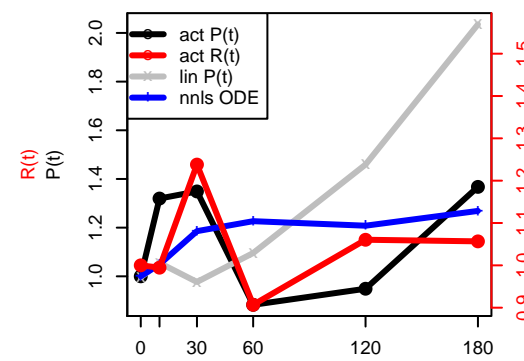

Time (min)  
ks = 0.0359610985454916 kd = 0.0300696490782564

SPBC23E6.09

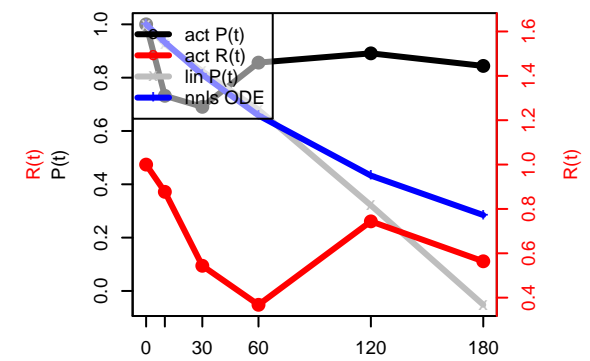

Time (min)  
ks = 0 kd = 0.00697686417146131

SPBC23G7.05

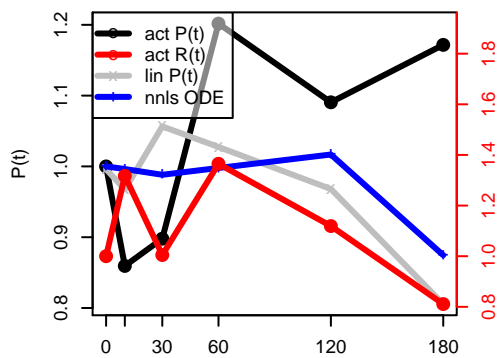

Time (min)  
ks = 0.0151444622540849 kd = 0.0180247518181289

SPBC25B2.06c

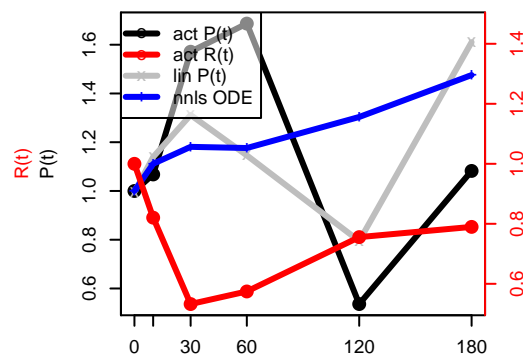

Time (min)  
ks = 0.0269731810506947 kd = 0.0126589812061048

SPBC26H8.02c

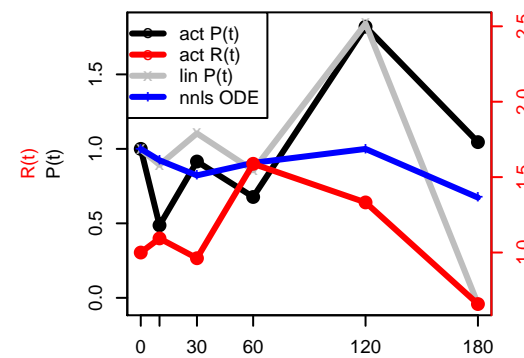

Time (min)  
ks = 0.0257034751296918 kd = 0.0360499918471232

SPBC27.08c

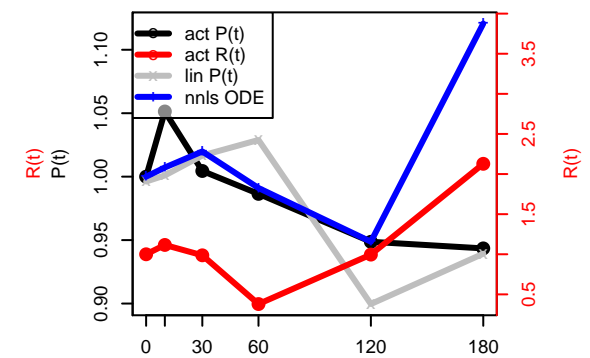

Time (min)  
ks = 0.00433148741392646 kd = 0.00385081766977747

SPBC2D10.05

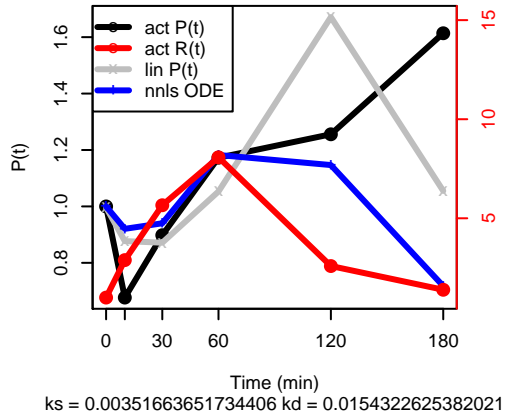

SPBC2G2.08

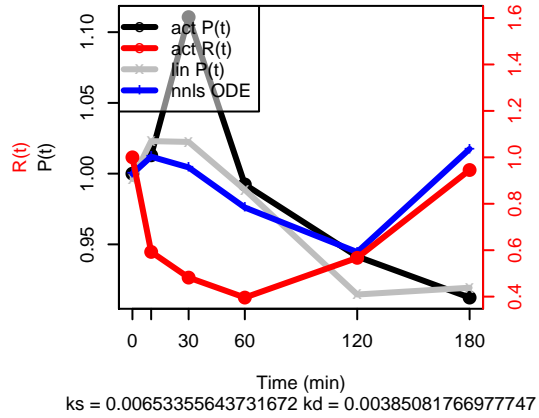

SPBC30B4.02c

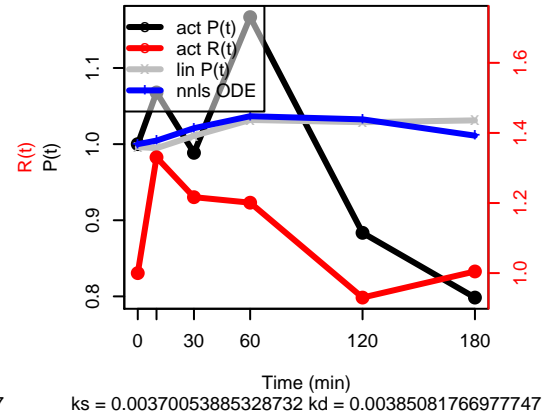

SPBC31F10.07

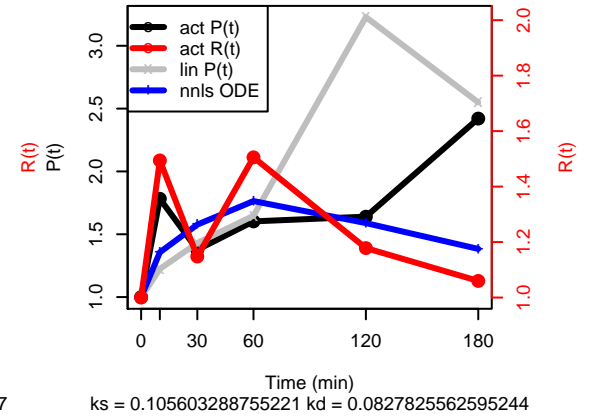

SPBC32F12.02

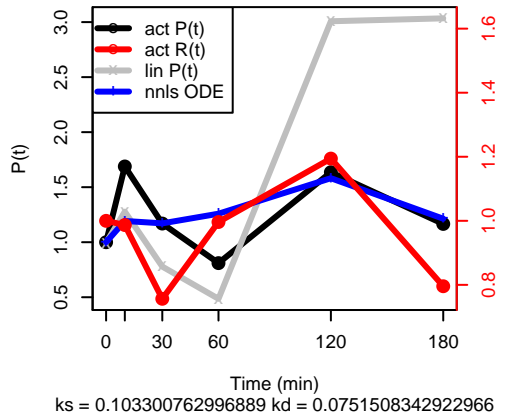

SPBC336.04

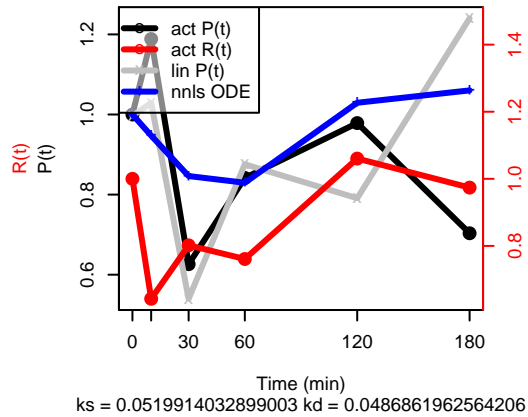

SPBC36.09

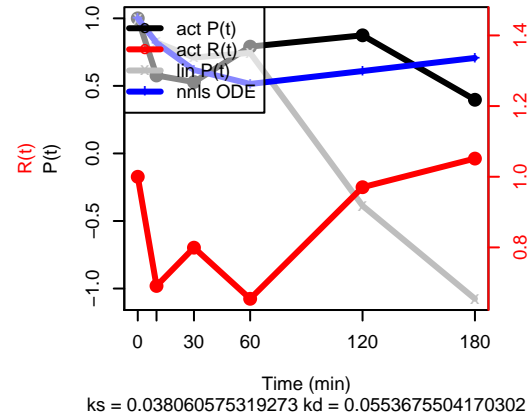

SPBC409.10

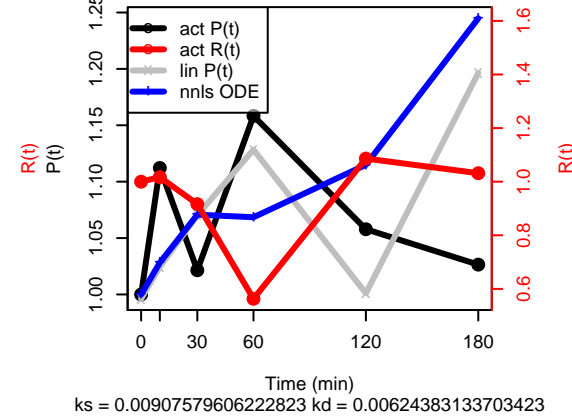

SPBC428.05c

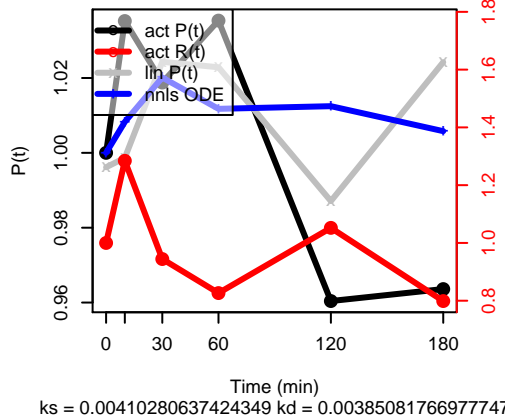

SPBC4B4.01c

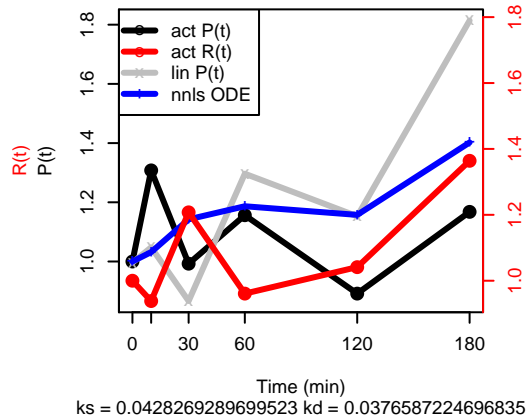

SPBC4C3.03

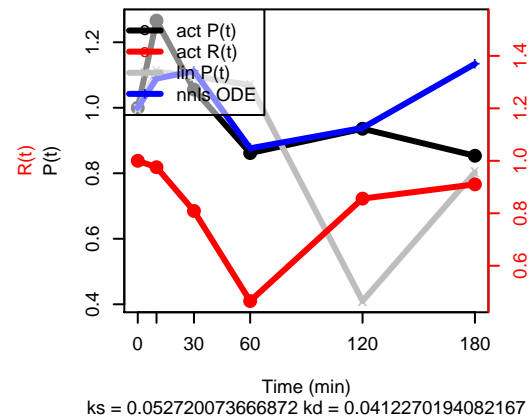

SPBC4F6.06

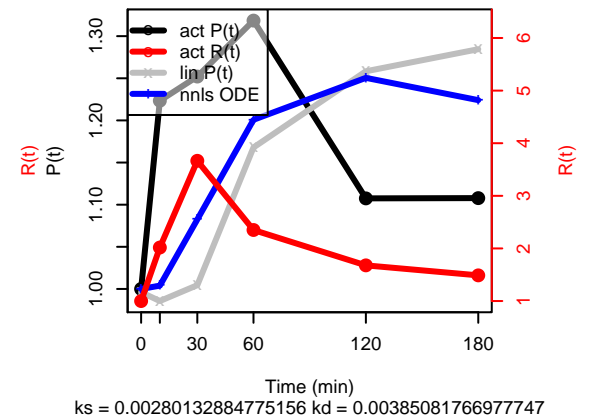

SPBC4F6.07c

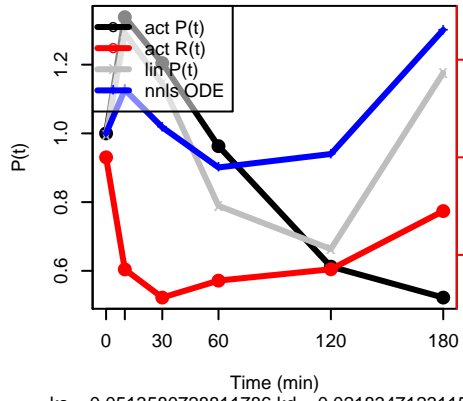

SPBC543.02c

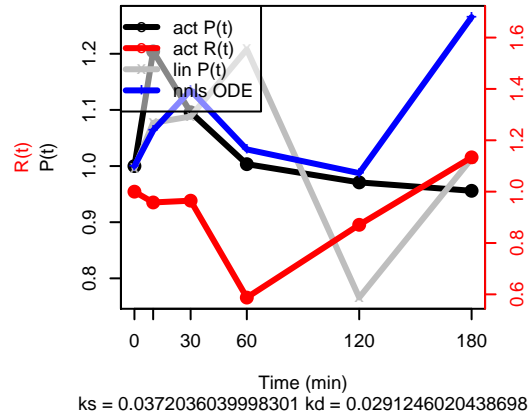

SPBC660.11

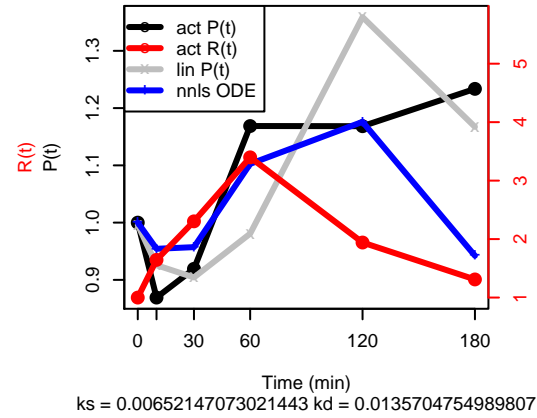

SPBC713.10

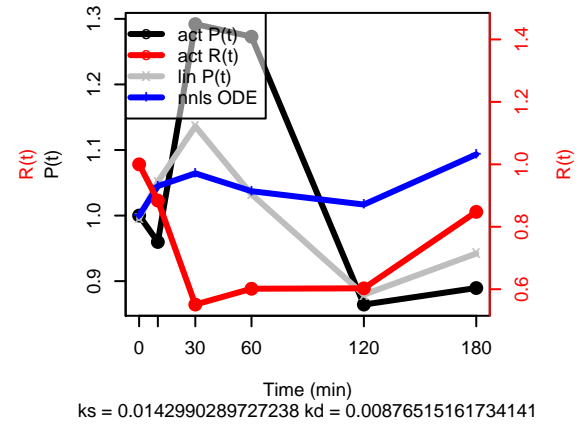

SPBC725.09c

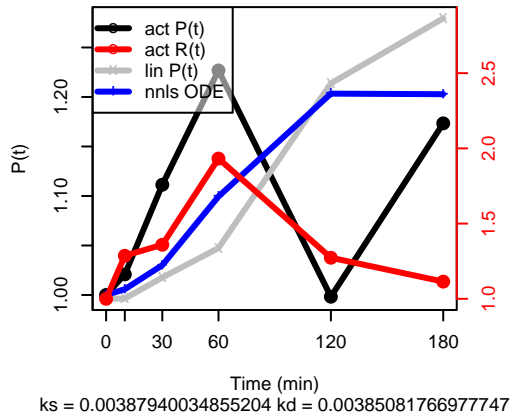

SPBPJ4664.06

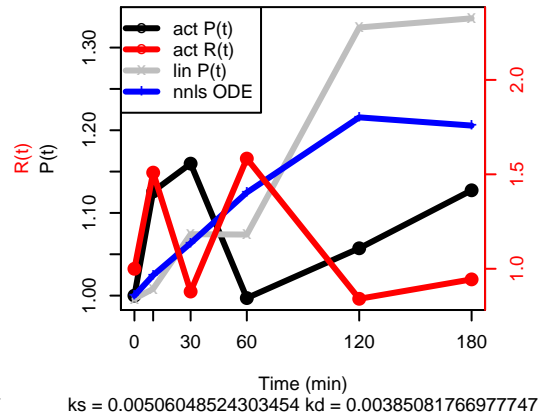

SPCC1494.10

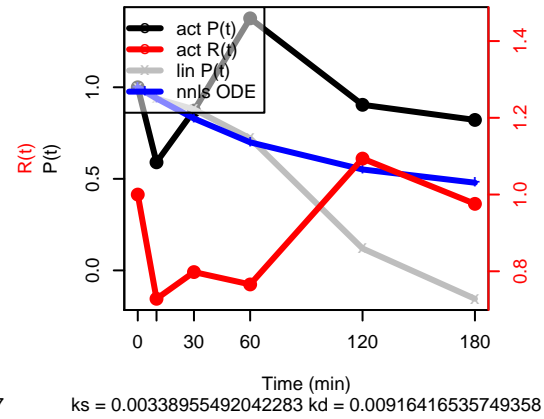

SPCC14G10.03c

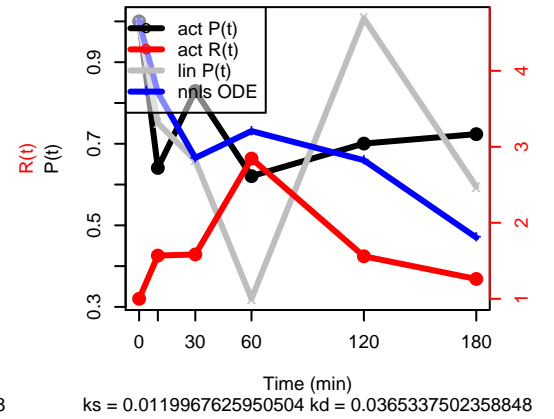

SPCC1672.10

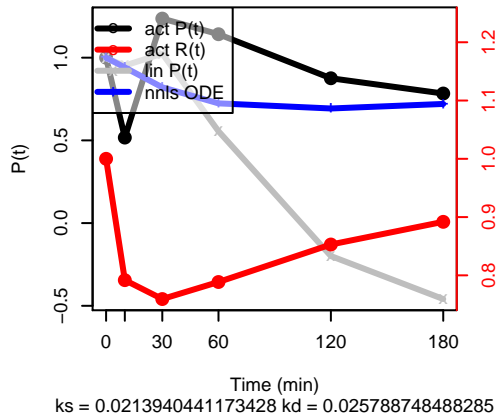

SPCC1682.05c

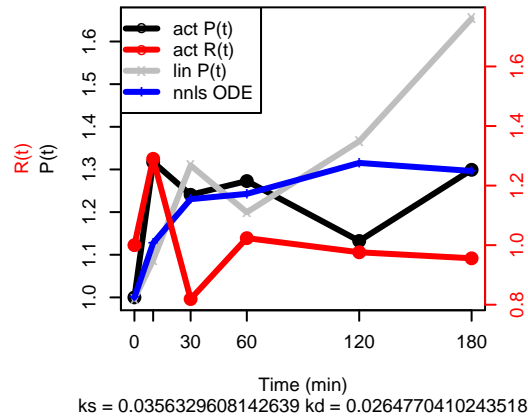

SPCC16C4.03

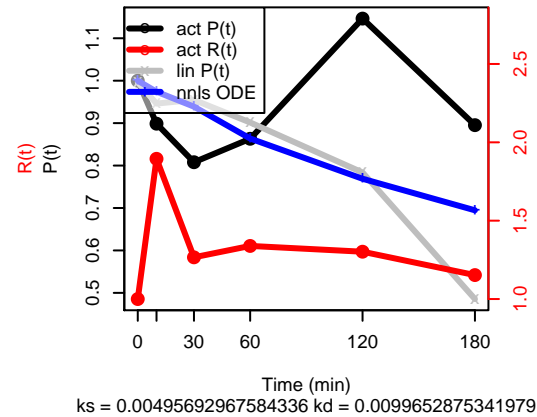

SPCC1840.05c

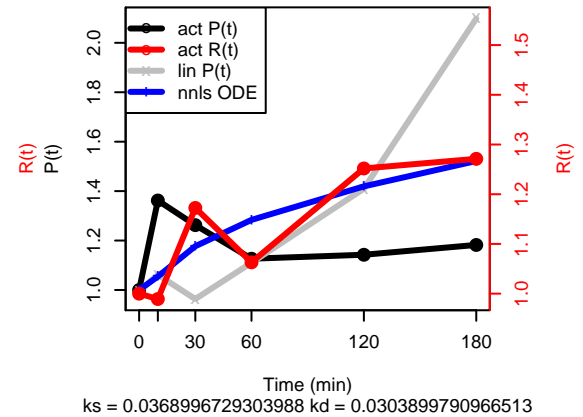

SPCC24B10.04

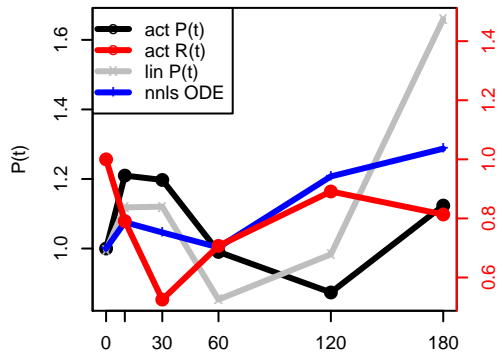

Time (min)  
ks = 0.0349992816002958 kd = 0.0227958083332047

SPCC24B10.05

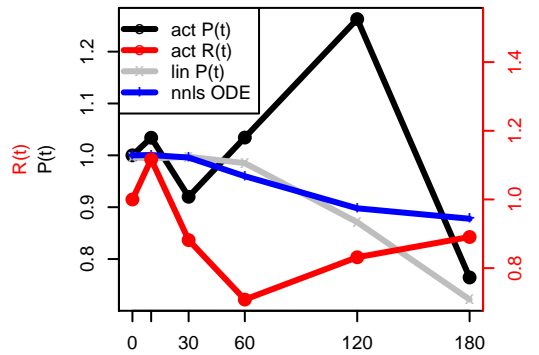

Time (min)  
ks = 0.00507893449965187 kd = 0.00531468714596017

SPCC285.15c

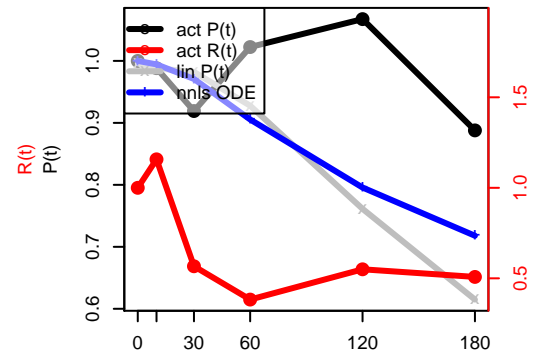

Time (min)  
ks = 0.0030384385681179 kd = 0.00385081766977747

SPCC338.04

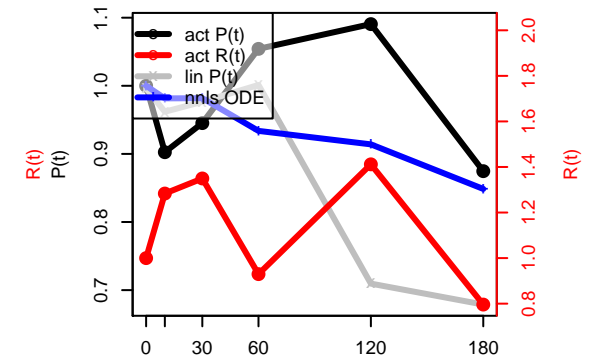

Time (min)  
ks = 0.010038037939439 kd = 0.013462772845147

SPCC338.11c

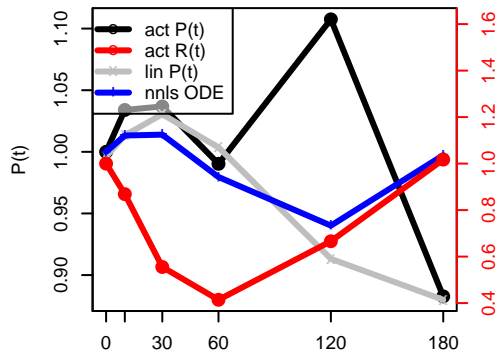

Time (min)  
ks = 0.00557090434989817 kd = 0.00385081766977747

SPCC4G3.04c

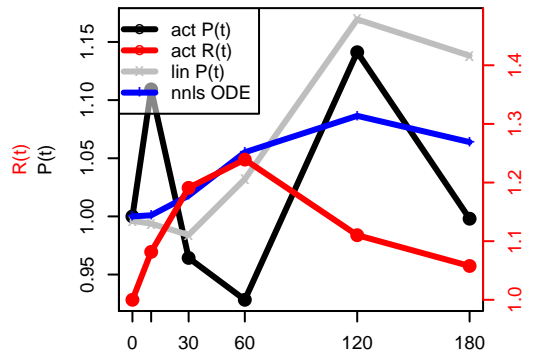

Time (min)  
ks = 0.00807346866785348 kd = 0.0083110774975081

SPCC553.08c

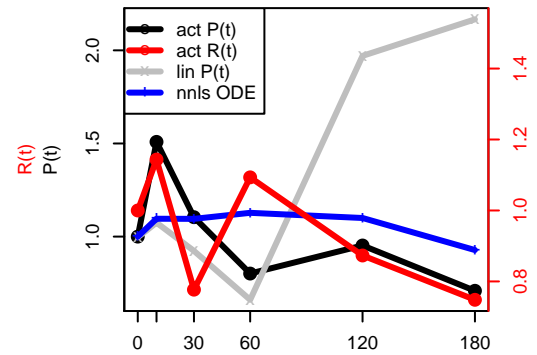

Time (min)  
ks = 0.0532265260024199 kd = 0.0453655246829128

SPCC569.08c

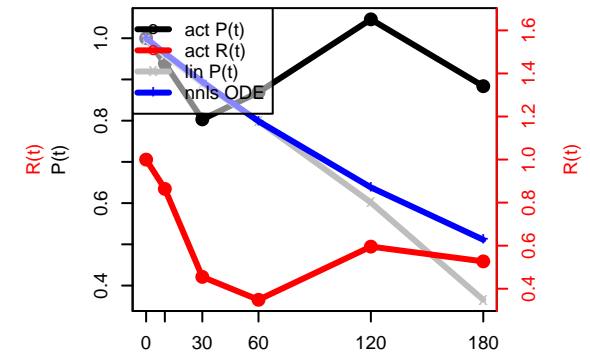

Time (min)  
ks = 0.000156354129607314 kd = 0.00385081766977747

SPCC613.04c

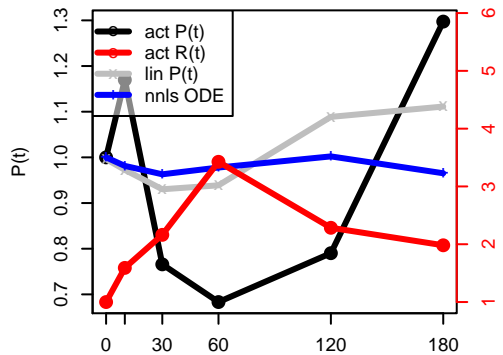

Time (min)  
ks = 0.00149681336486108 kd = 0.00385081766977747

SPCC613.10

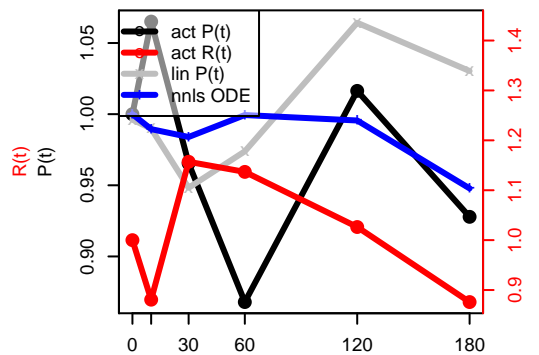

Time (min)  
ks = 0.00763827131612077 kd = 0.00826897155841801

SPCC736.12c

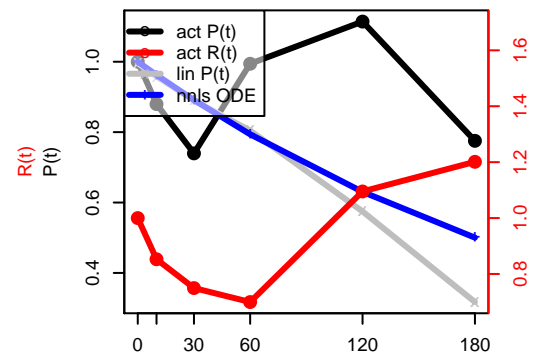

Time (min)  
ks = 0 kd = 0.00385081766977747

SPCC737.09c

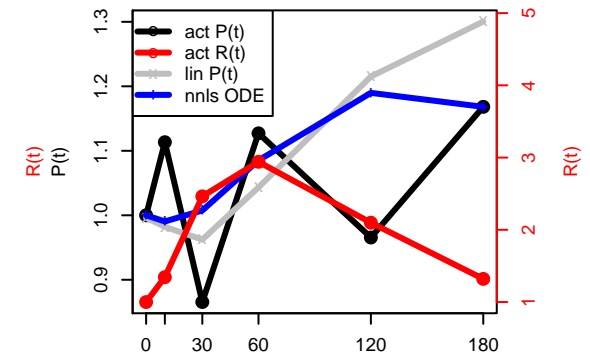

Time (min)  
ks = 0.00244923968783194 kd = 0.00385081766977747

SPCP1E11.11

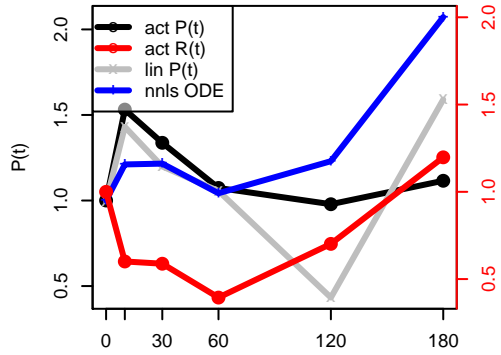

Time (min)  
ks = 0.0839237976012372 kd = 0.0404858612585718

SPAC140.01

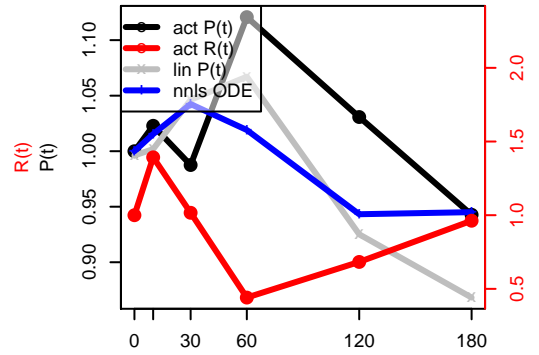

Time (min)  
ks = 0.00442287664383665 kd = 0.00385081766977747

SPAC14C4.02c

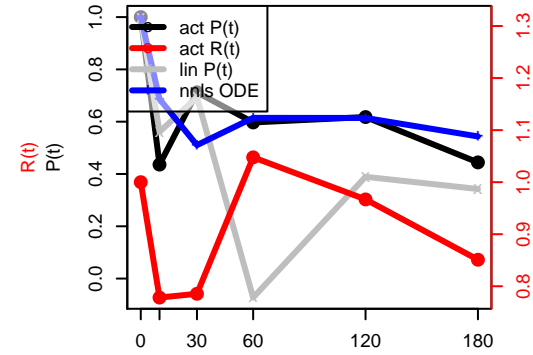

Time (min)  
ks = 0.0747410667598114 kd = 0.118243349360596

SPAC15E1.03

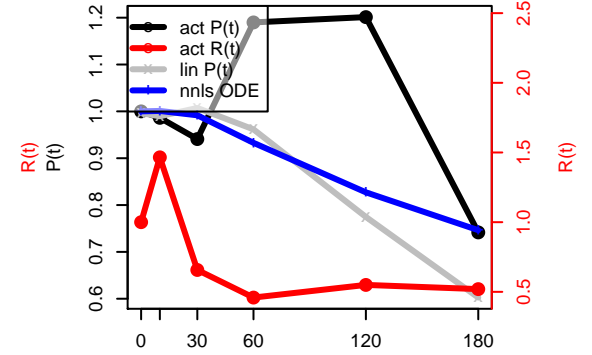

Time (min)  
ks = 0.00319545526894928 kd = 0.00385081766977747

SPAC17A2.03c

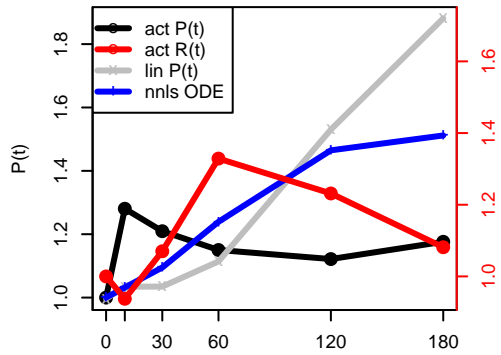

Time (min)  
ks = 0.0142218699935964 kd = 0.0103983207903446

SPAC17A5.12

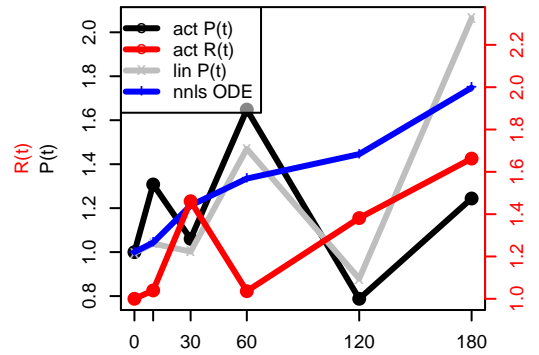

Time (min)  
ks = 0.0275659332195045 kd = 0.0232975770787835

SPAC1851.02

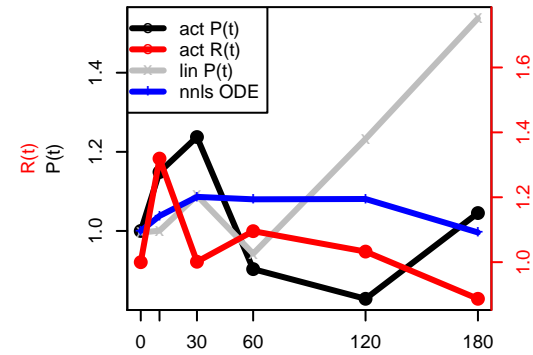

Time (min)  
ks = 0.0230826129772746 kd = 0.0226383014115805

SPAC18G6.12c

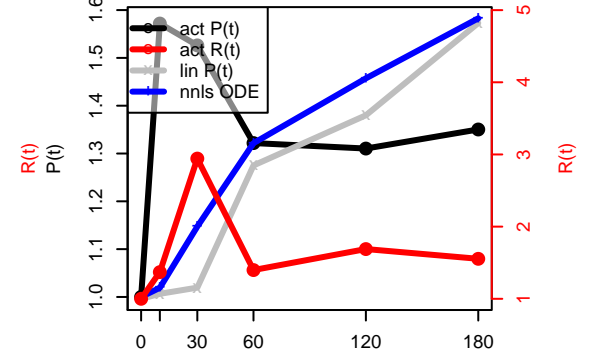

Time (min)  
ks = 0.0048911963620998 kd = 0.00385081766977747

SPAC18G6.14c

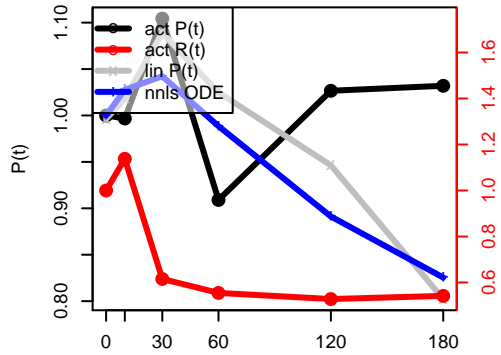

Time (min)  
ks = 0.00937778098786062 kd = 0.00716192272597871

SPAC23D3.06c

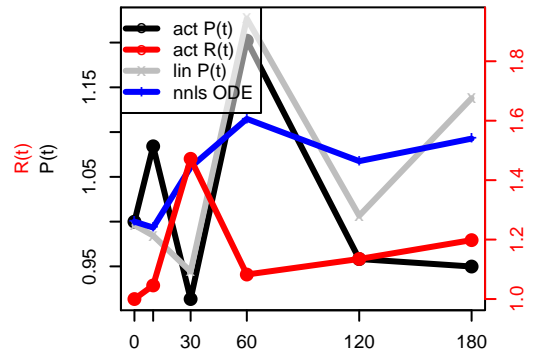

Time (min)  
ks = 0.0188039963964561 kd = 0.0199855975309186

SPAC23H4.10c

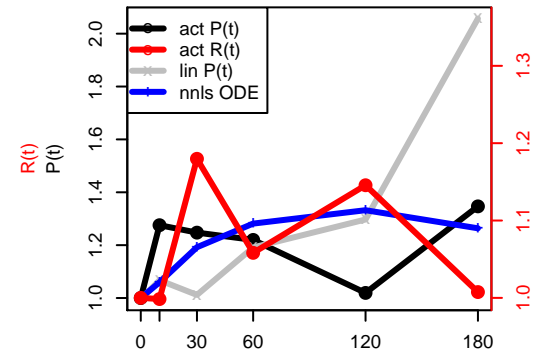

Time (min)  
ks = 0.042827578204561 kd = 0.0357080701676494

SPAC24H6.07

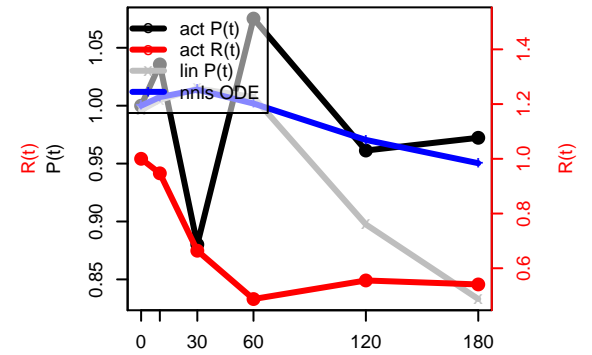

Time (min)  
ks = 0.0047321590843574 kd = 0.00385081766977747

SPAC25B8.13c

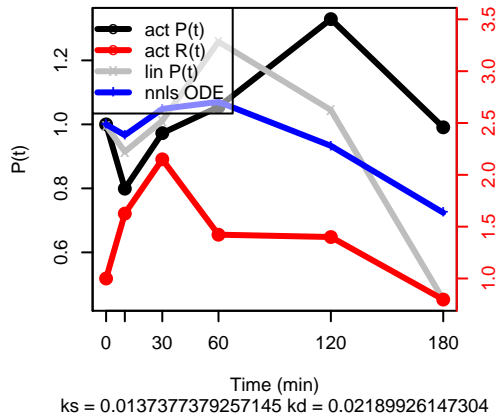

SPAC29A4.18

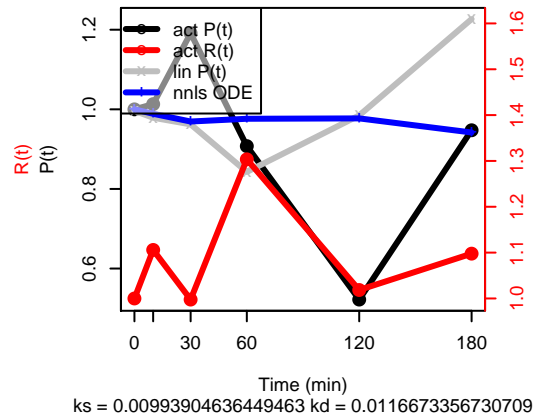

SPAC2H10.02c

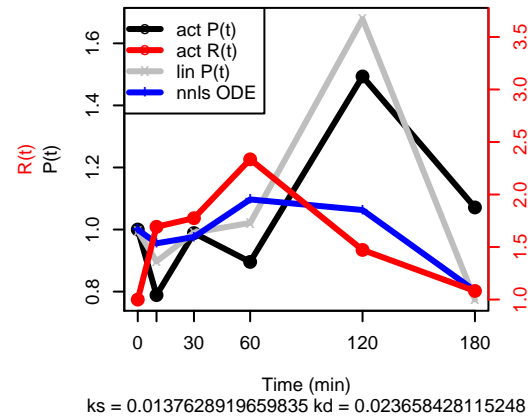

SPAC3A12.11c

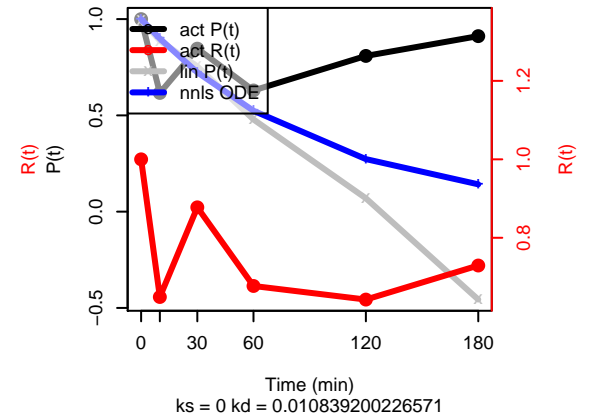

SPAC3G9.06

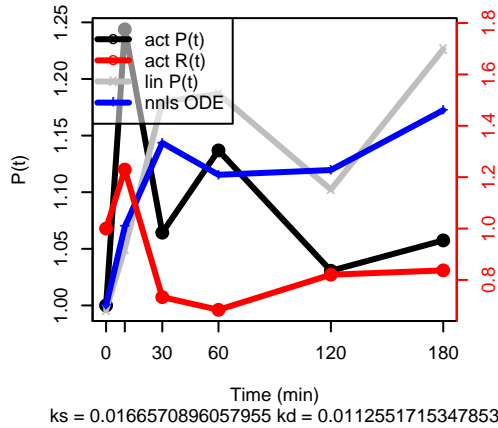

SPAC3H1.05

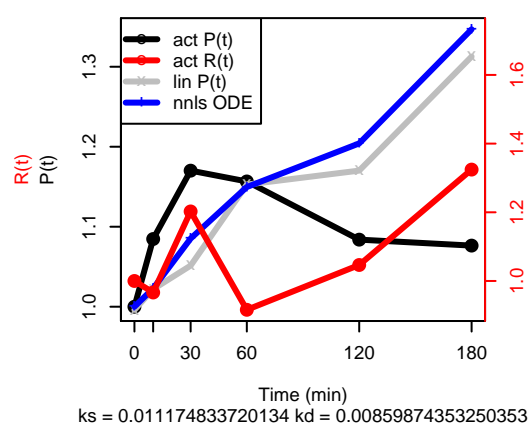

SPAC56F8.08

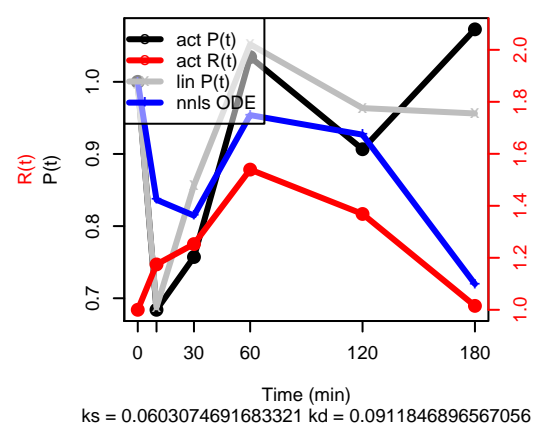

SPAC644.08

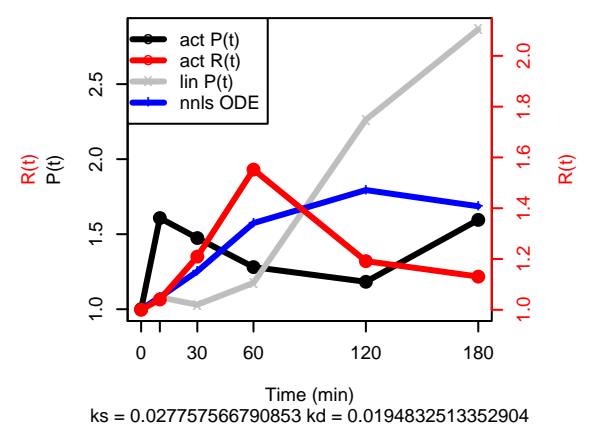

SPAC732.02c

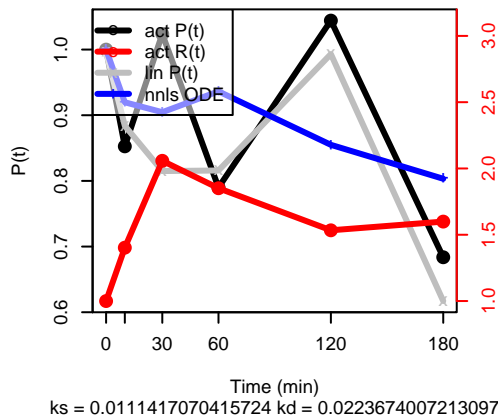

SPAC823.15

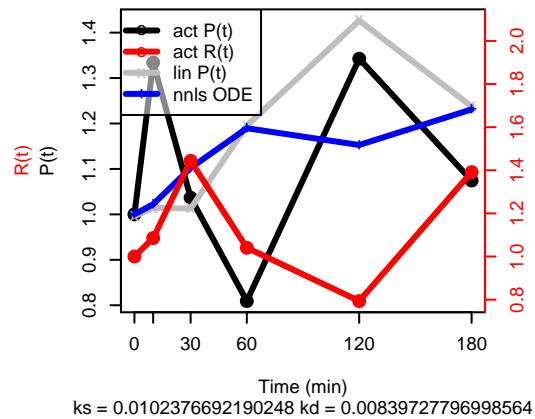

SPAP8A3.09c

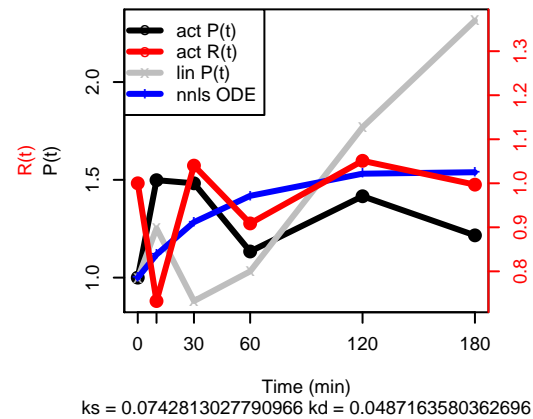

SPBC1289.03c

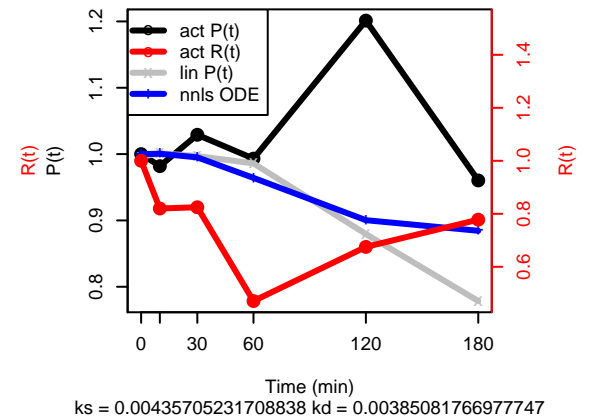

SPBC12C2.07c

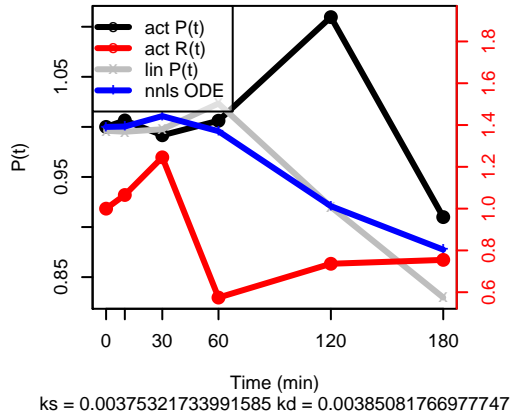

SPBC12C2.08

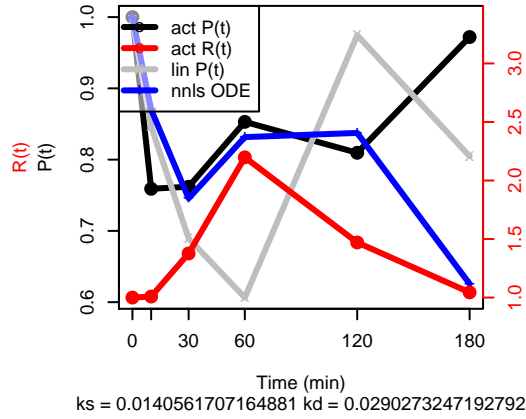

SPBC13A2.02

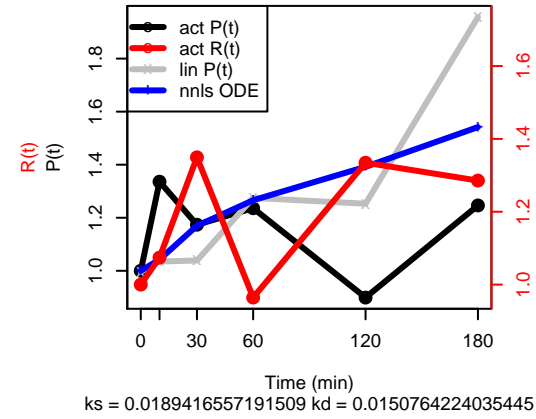

SPBC1734.15

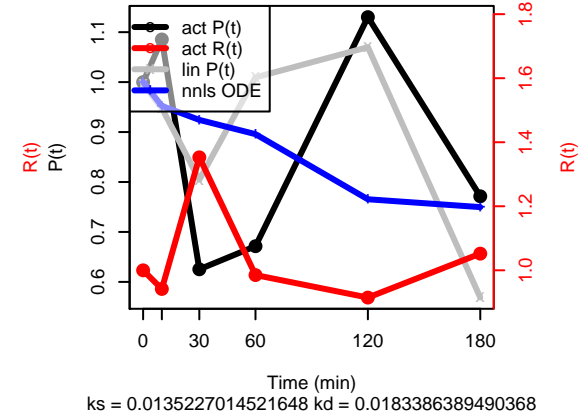

SPBC23E6.06c

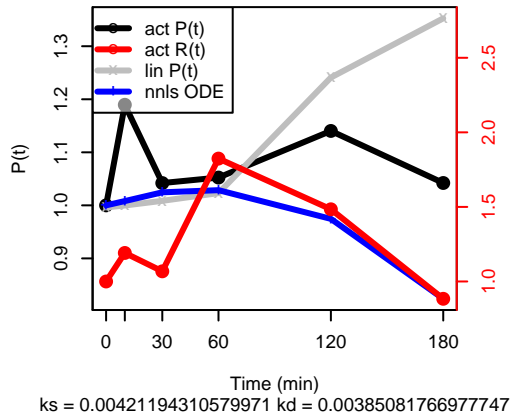

SPBC24C6.04

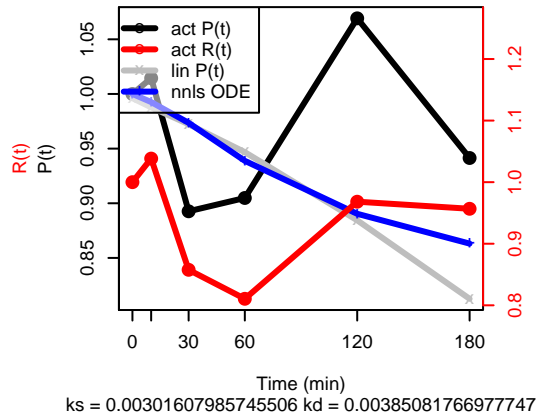

SPBC25H2.03

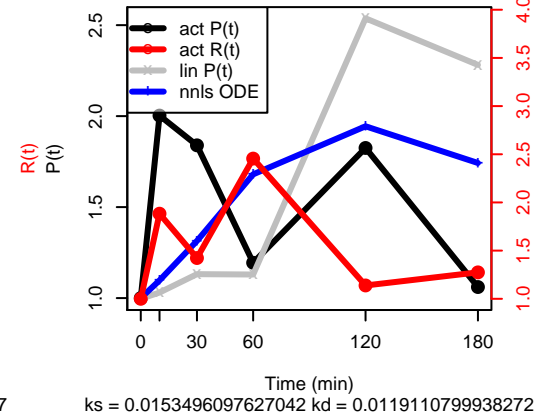

SPBC25H2.13c

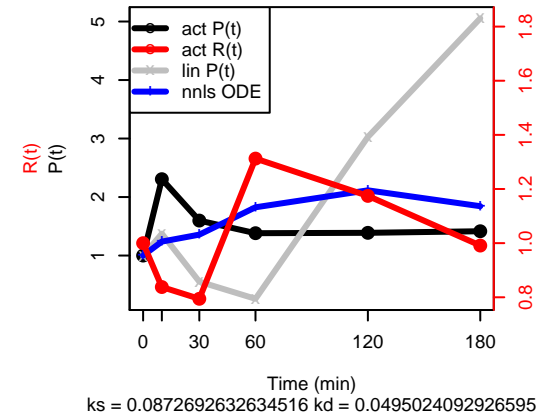

SPBC29A10.06c

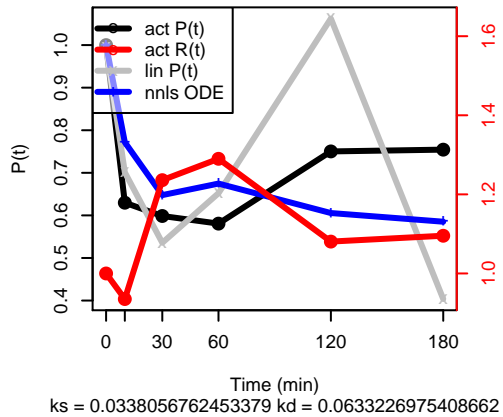

SPBC29A3.07c

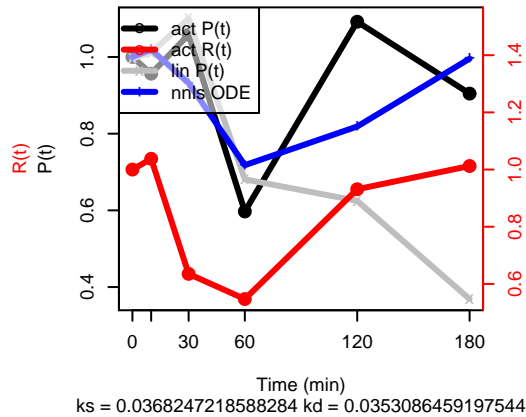

SPBC29B5.04c

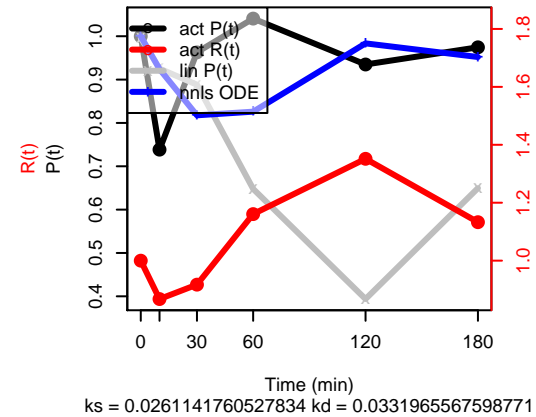

SPBC2A9.09

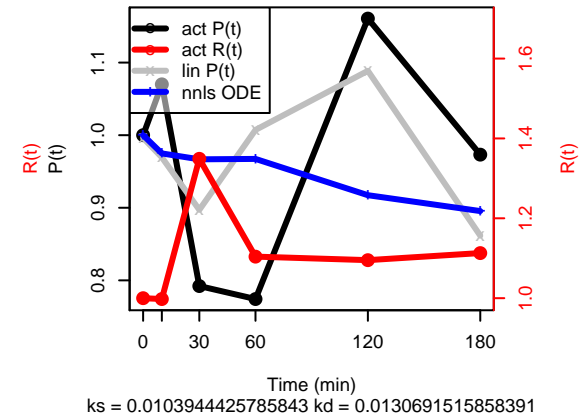



SPBC30D10.05c

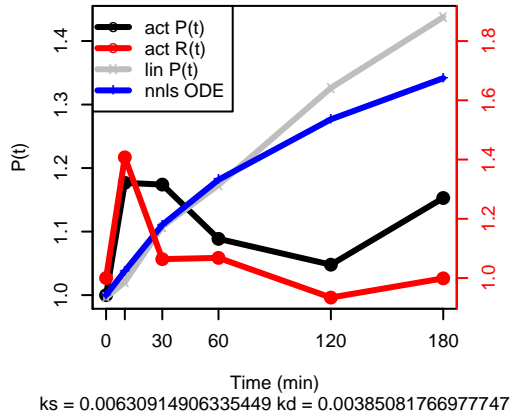

SPBC31E1.02c

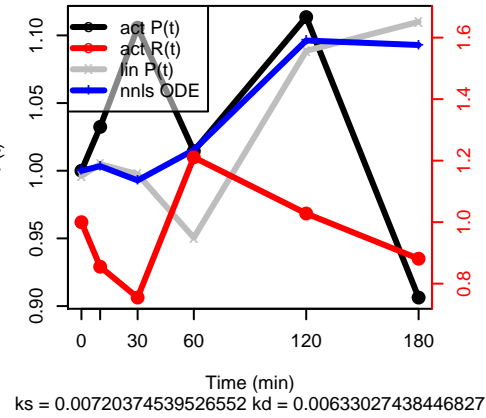

SPBC31F10.16

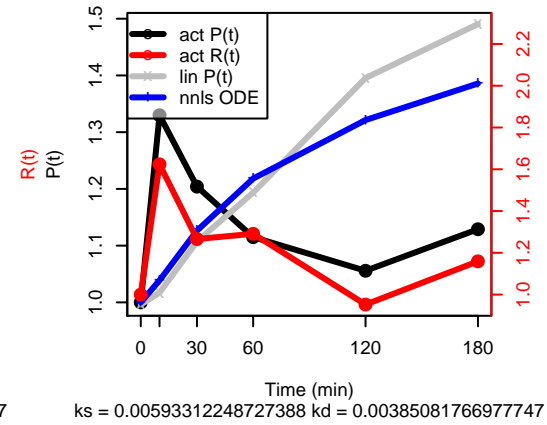

SPBC32H8.12c

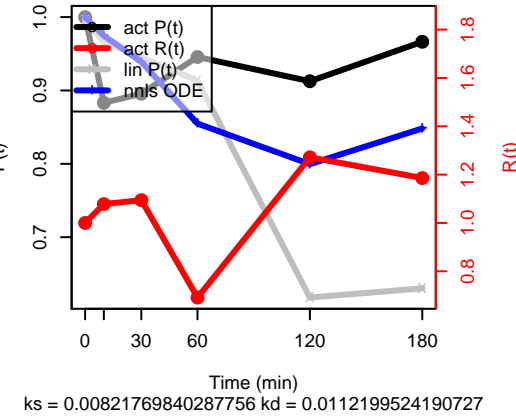

SPBC342.02

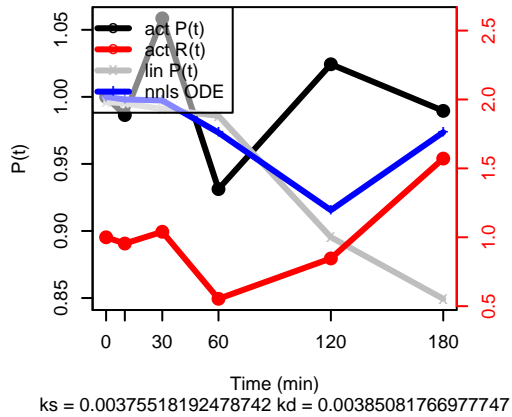

SPBC36.04

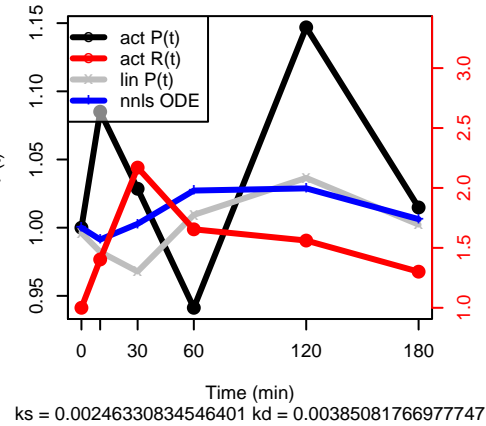

SPBC3D6.04c

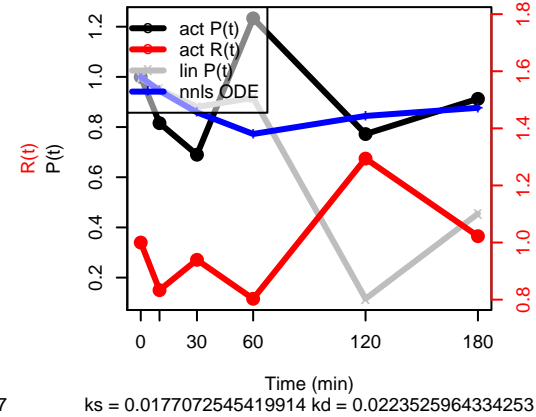

SPBC3H7.01

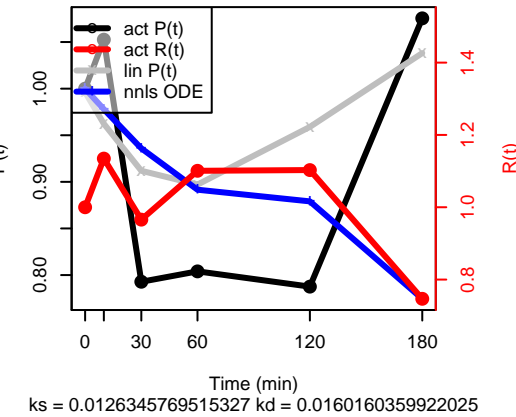

SPBC405.06

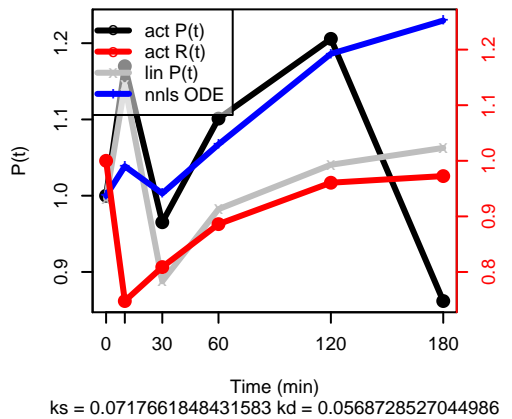

SPBC56F2.04

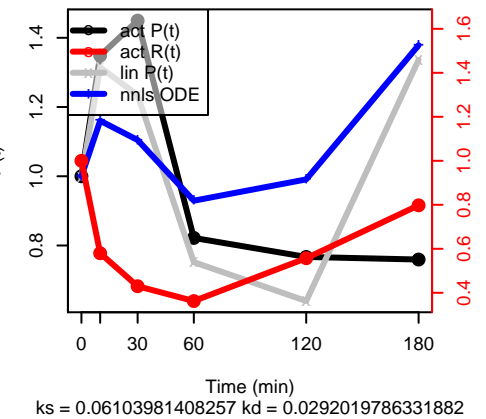

SPBC56F2.08c

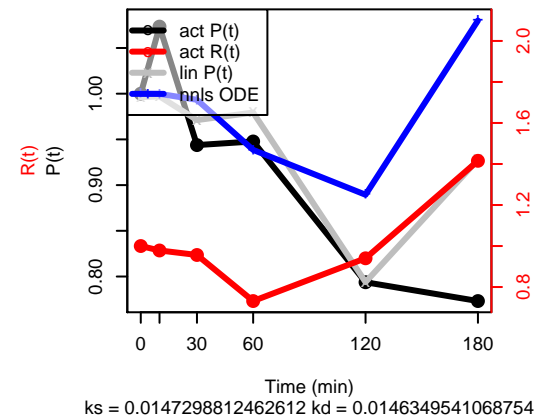

SPBC582.09

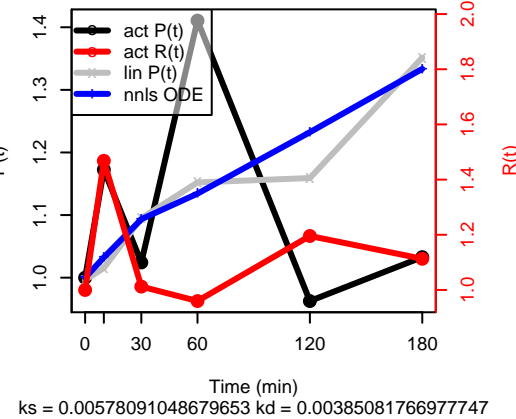

SPBC646.08c

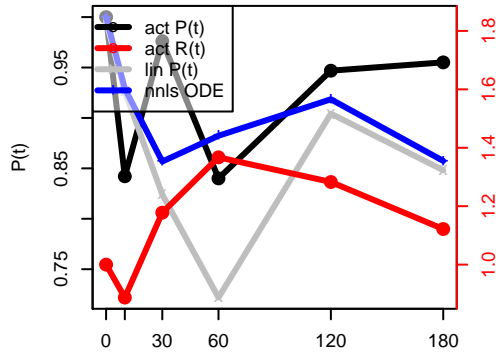

Time (min)  
ks = 0.0168847908632575 kd = 0.023863171561138

SPBC646.15c

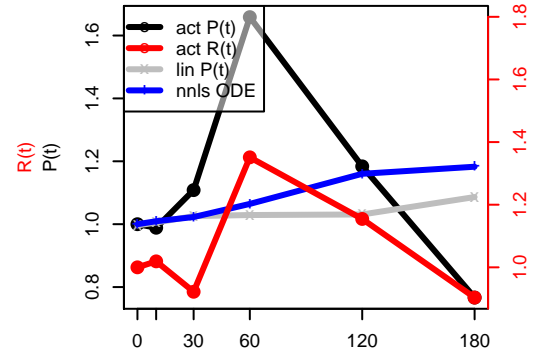

Time (min)  
ks = 0.00474880195698014 kd = 0.00385081766977747

SPBC8D2.17

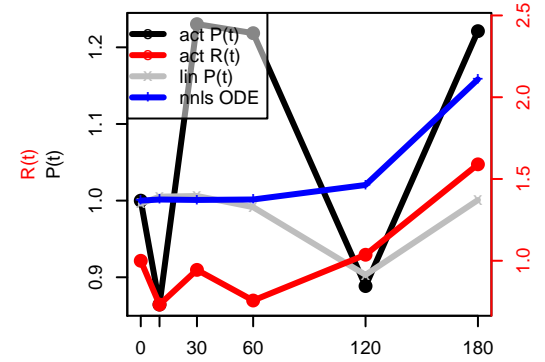

Time (min)  
ks = 0.00557338356065468 kd = 0.00467158500729306

SPCC1183.02

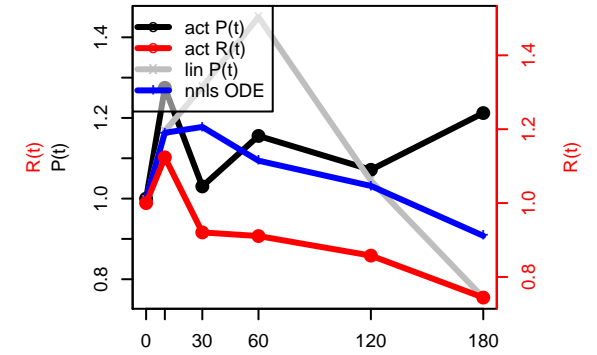

Time (min)  
ks = 0.108671043775777 kd = 0.0915146164334734

SPCC126.10

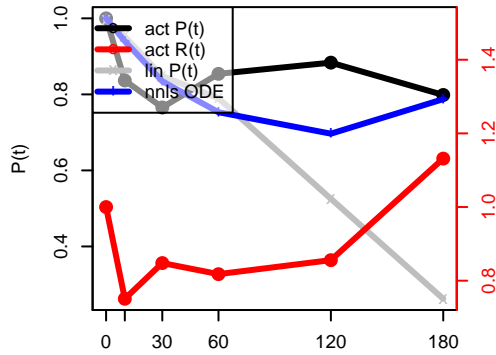

Time (min)  
ks = 0.0174972358611889 kd = 0.0219132136710154

SPCC16C4.14c

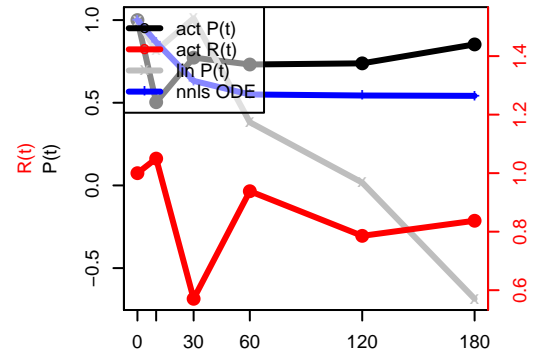

Time (min)  
ks = 0.0345054141621434 kd = 0.0525832208956021

SPCC1739.12

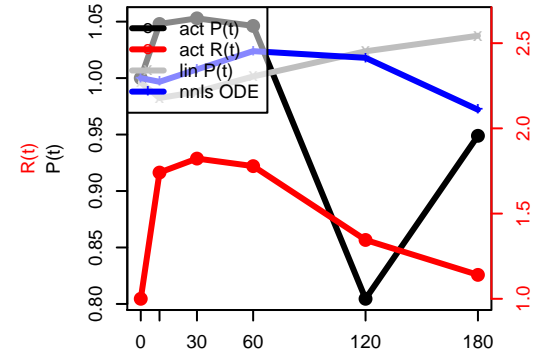

Time (min)  
ks = 0.00247377039899993 kd = 0.00385081766977747

SPCC188.08c

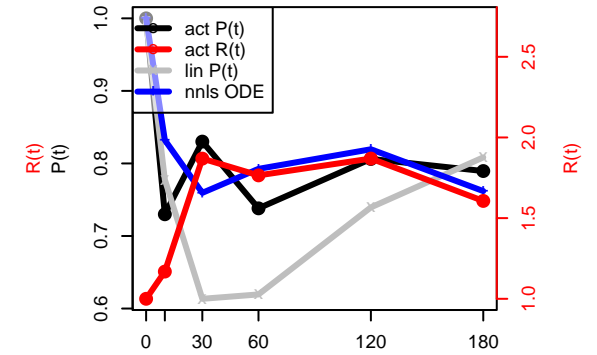

Time (min)  
ks = 0.0176593521500103 kd = 0.0395192922484636

SPCC1902.02

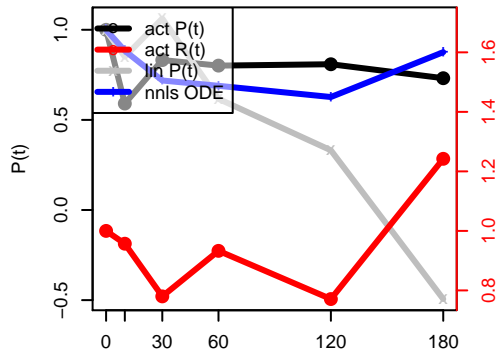

Time (min)  
ks = 0.0523712428722922 kd = 0.0669321628034115

SPCC338.15

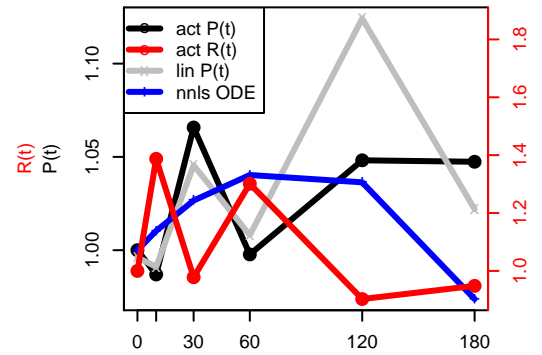

Time (min)  
ks = 0.0080481965596901 kd = 0.0085563272366995

SPCC613.06

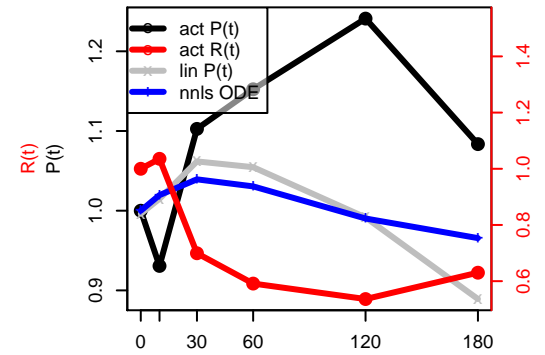

Time (min)  
ks = 0.00572699666323852 kd = 0.00385081766977747

SPCC63.12c

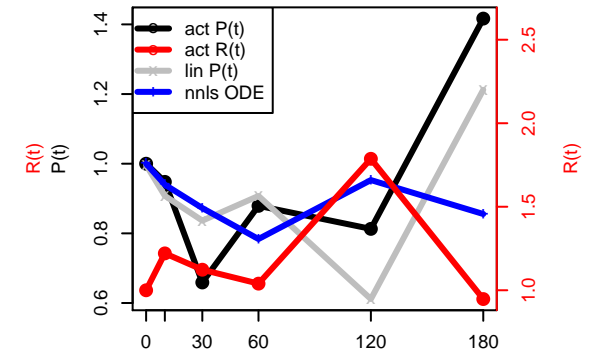

Time (min)  
ks = 0.0176574224344551 kd = 0.0264993769817191

SPCC645.07

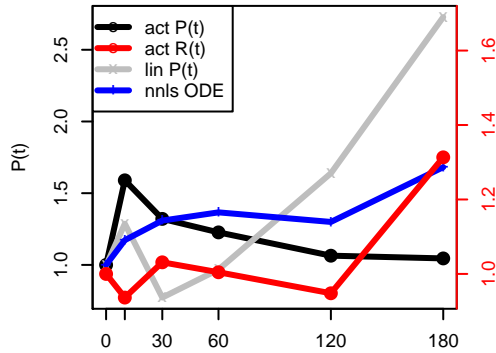

Time (min)  
ks = 0.110167402972117 kd = 0.0810800067647723

SPCC736.03c

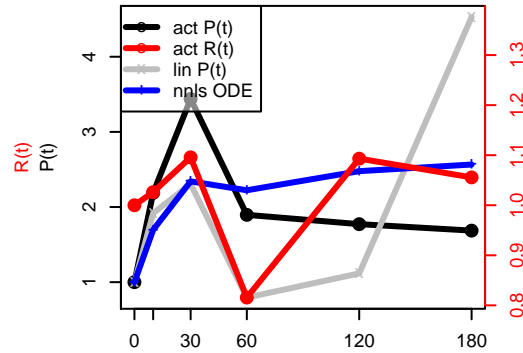

Time (min)  
ks = 0.156703902777368 kd = 0.0645845925744335

SPCC794.10

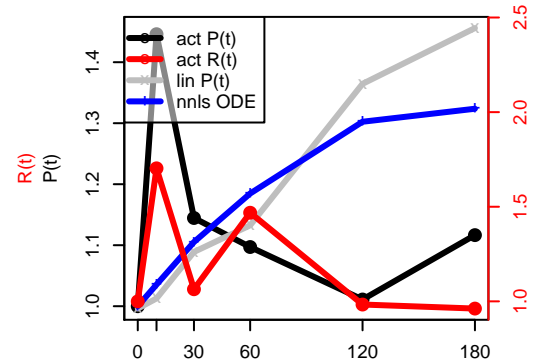

Time (min)  
ks = 0.00550869818046043 kd = 0.00385081766977747

SPCC825.02

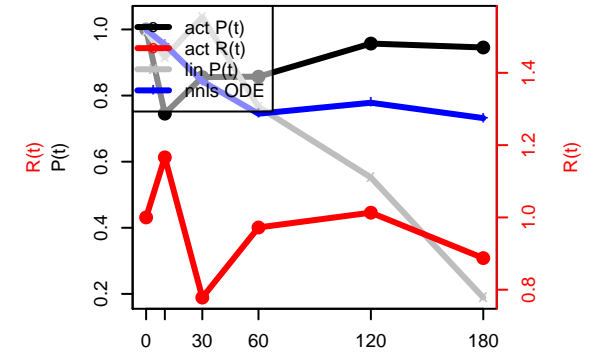

Time (min)  
ks = 0.0285267228722368 kd = 0.0365128485444892

SPCC962.02c

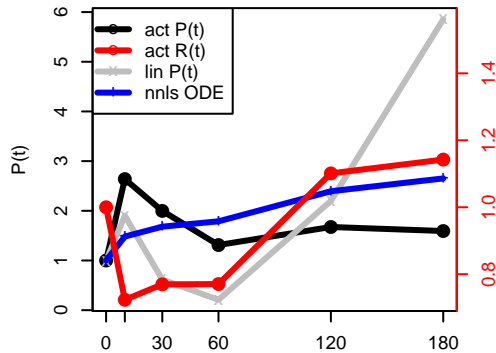

Time (min)  
ks = 0.158400170352031 kd = 0.0678015927200238

SPAC1006.05c

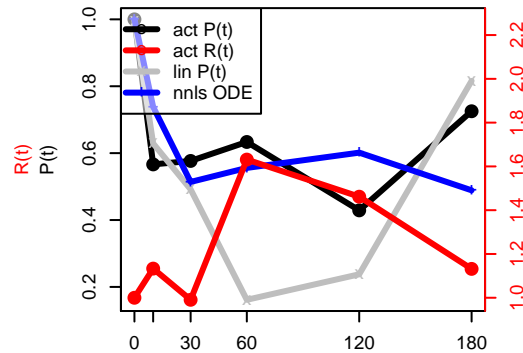

Time (min)  
ks = 0.0245856552681175 kd = 0.0613154922684686

SPAC11E3.13c

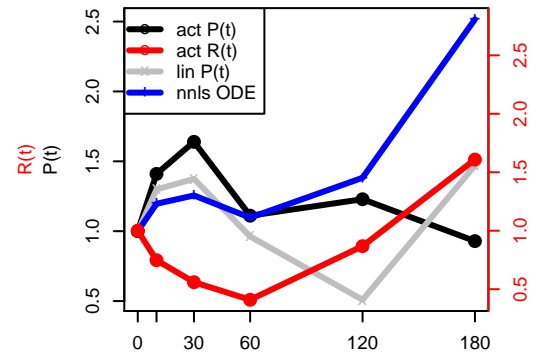

Time (min)  
ks = 0.0586359262107284 kd = 0.0284015094916754

SPAC15A10.13

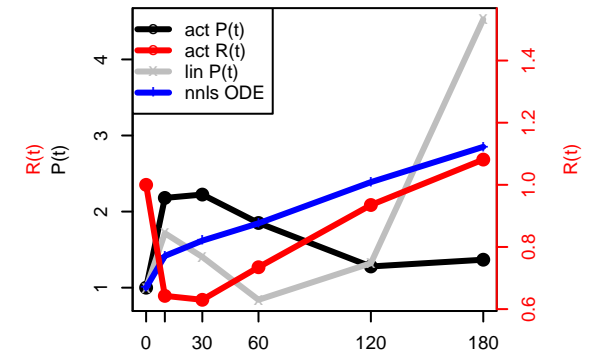

Time (min)  
ks = 0.11214048589689 kd = 0.04021029354881

SPAC1687.09

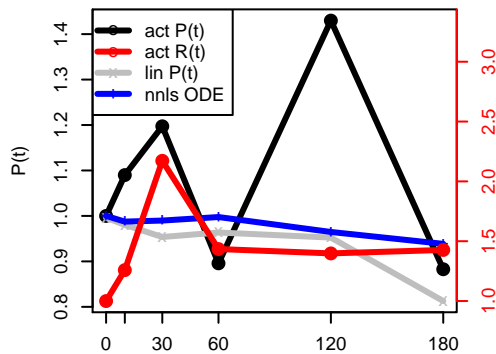

Time (min)  
ks = 0.00227415724964181 kd = 0.00385081766977747

SPAC1F5.11c

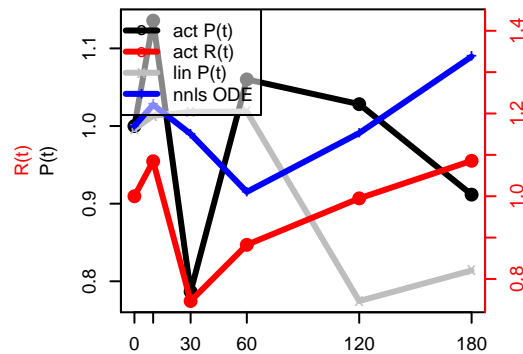

Time (min)  
ks = 0.0331237768121547 kd = 0.0314132190090828

SPAC20G8.05c

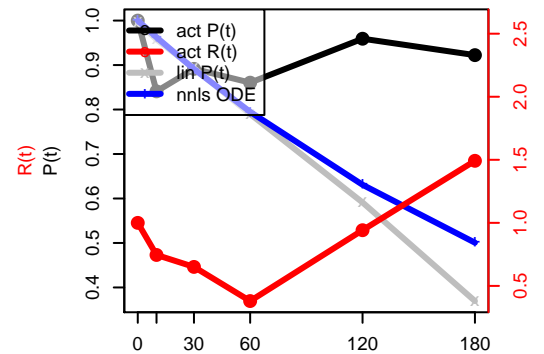

Time (min)  
ks = 0 kd = 0.00385081766977747

SPAC22E12.18

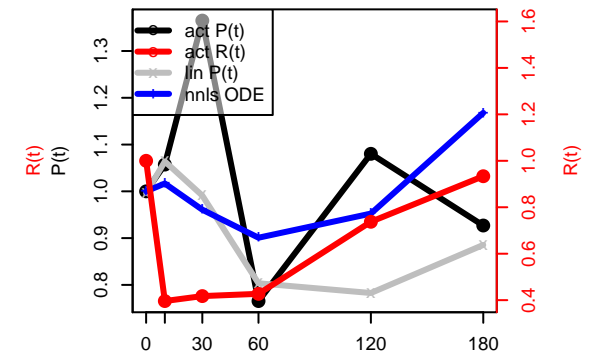

Time (min)  
ks = 0.0163574148885669 kd = 0.00958220564743085

SPAC22F8.08

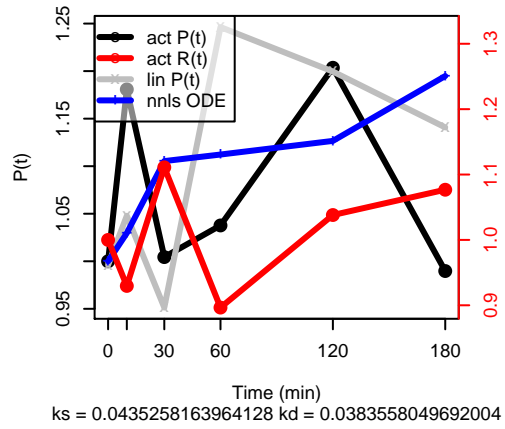

SPAC23E2.01

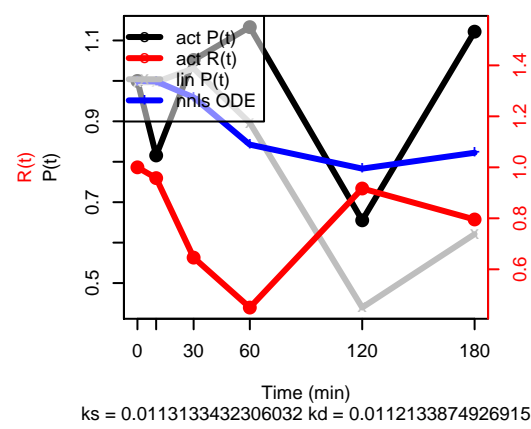

SPAC26A3.11

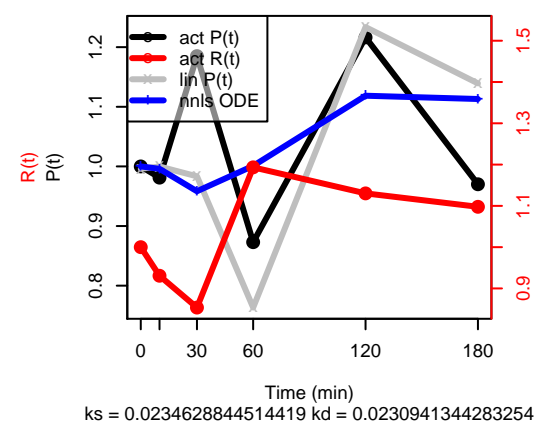

SPAC27E2.10c

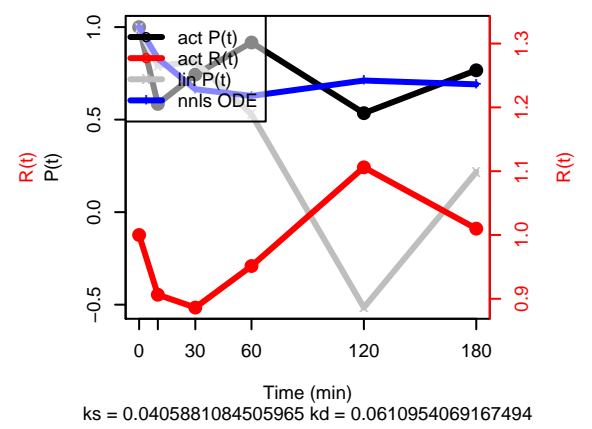

SPAC2F3.02

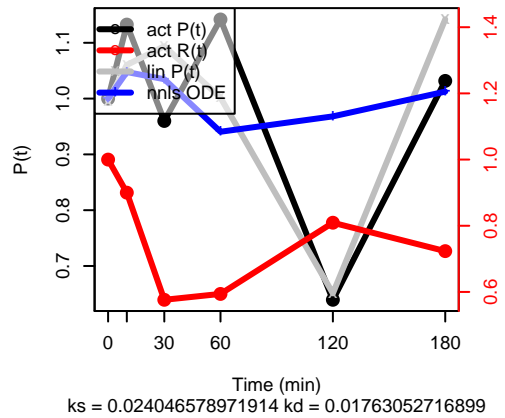

SPAC30.04c

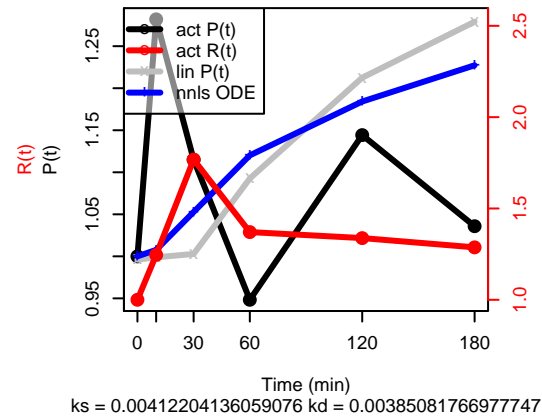

SPAC6G9.06c

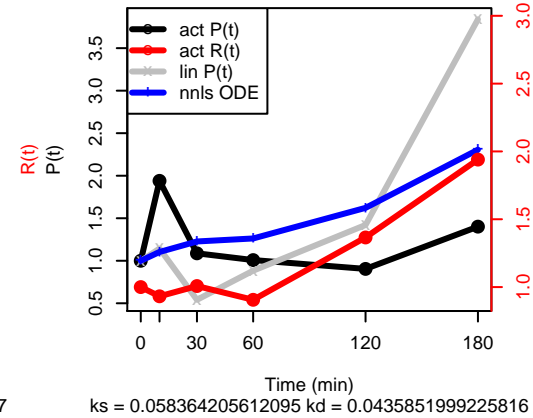

SPBC106.11c

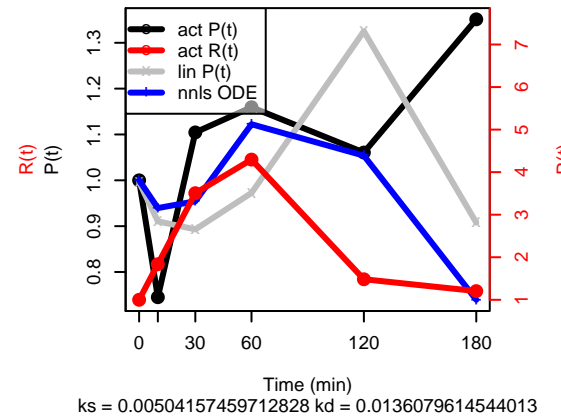

SPBC106.14c

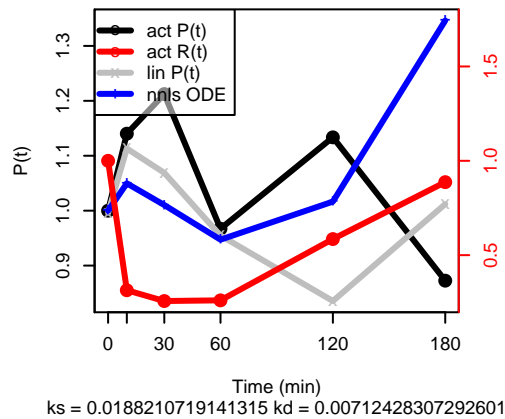

SPBC11G11.03

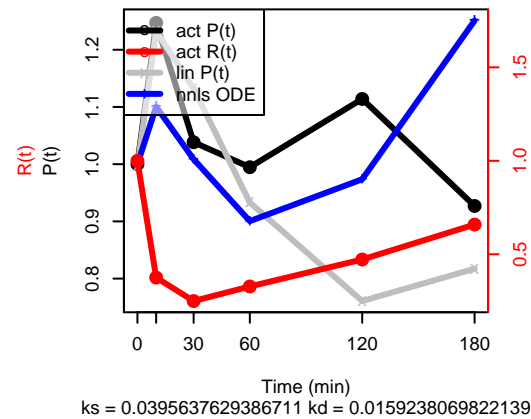

SPBC12D12.04c

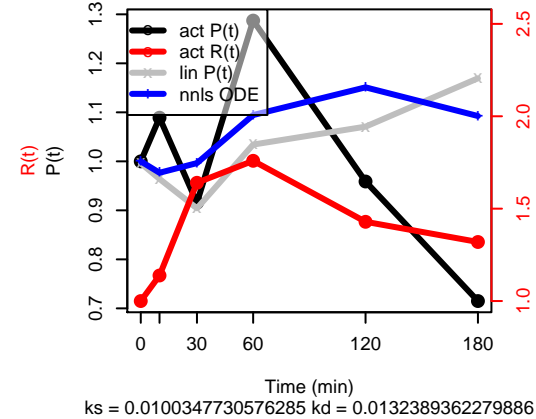

SPBC16C6.11

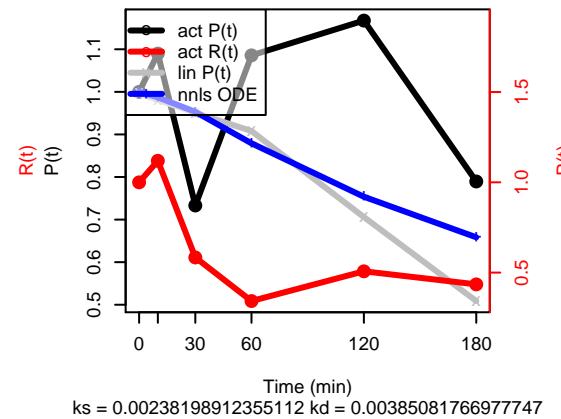

SPBC16E9.10c

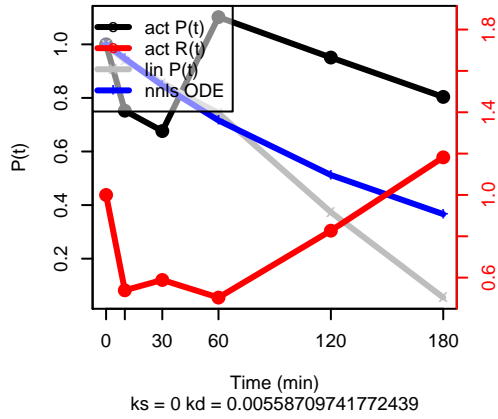

SPBC16G5.08

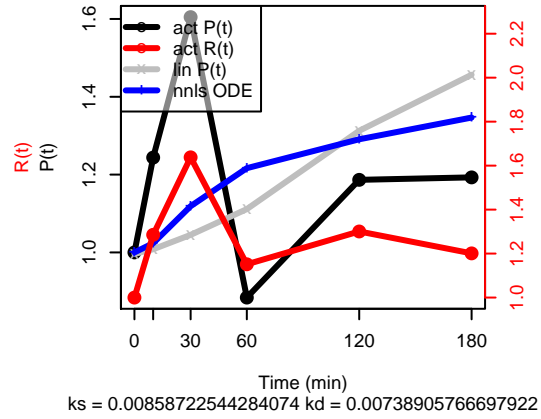

SPBC16H5.04

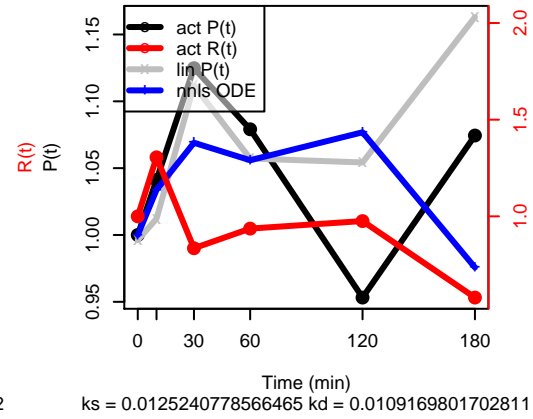

SPBC18E5.12c

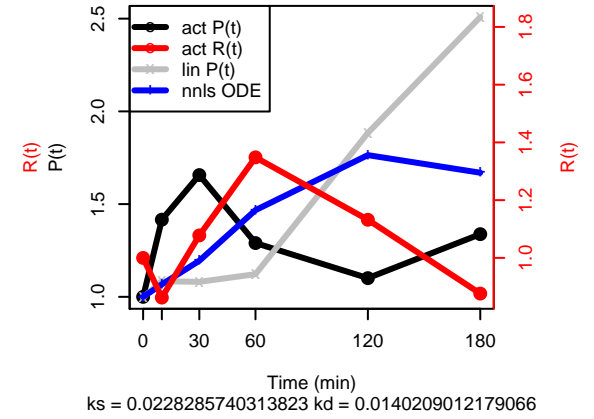

SPBC19C2.14

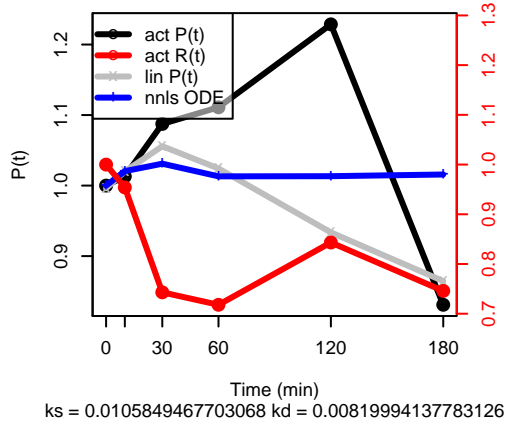

SPBC25H2.07

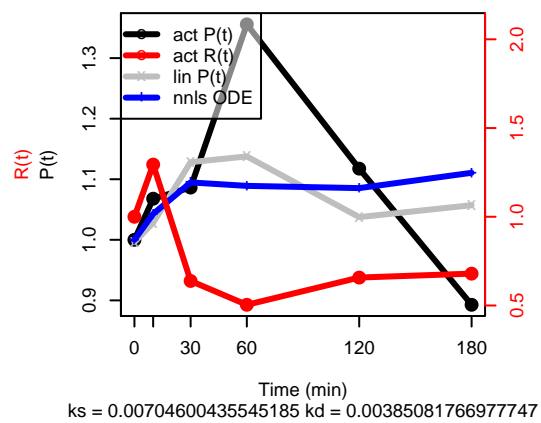

SPBC25H2.12c

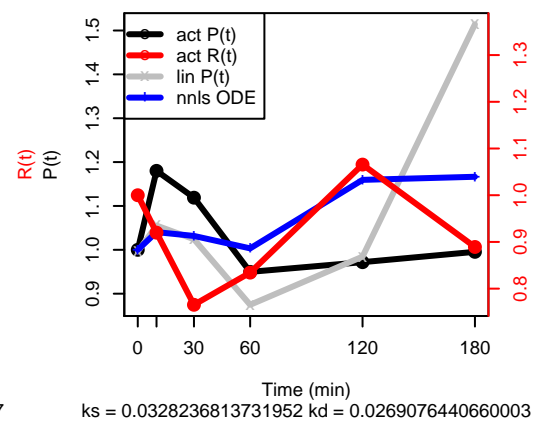

SPBC27B12.08

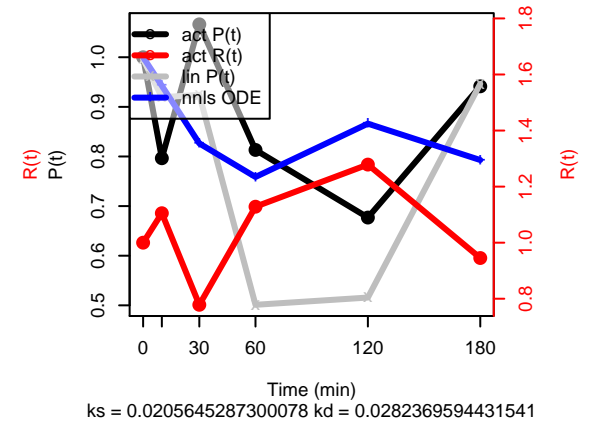

SPBC2F12.10

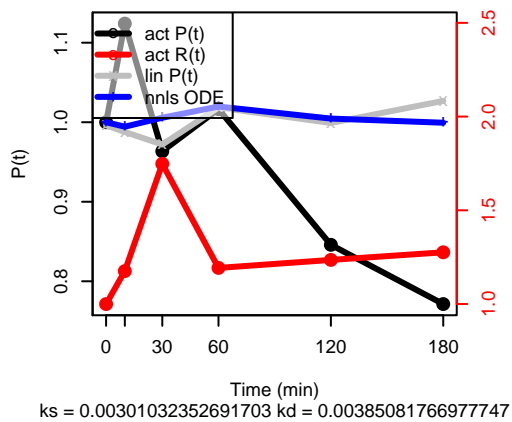

SPBC31E1.04

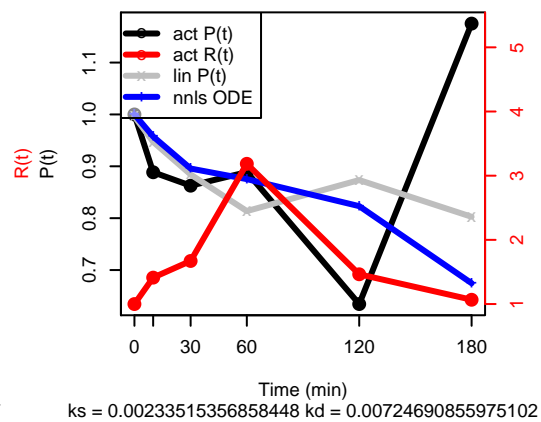

SPBC405.04c

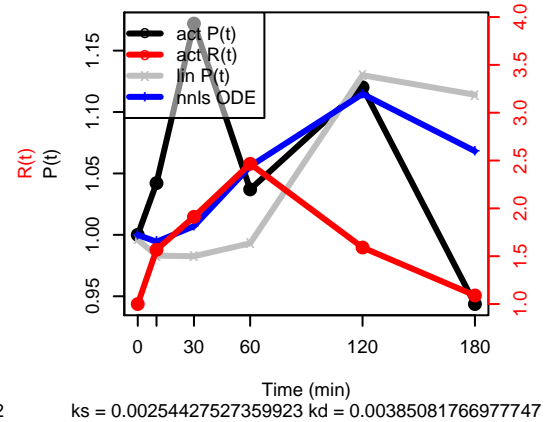

SPBC409.06

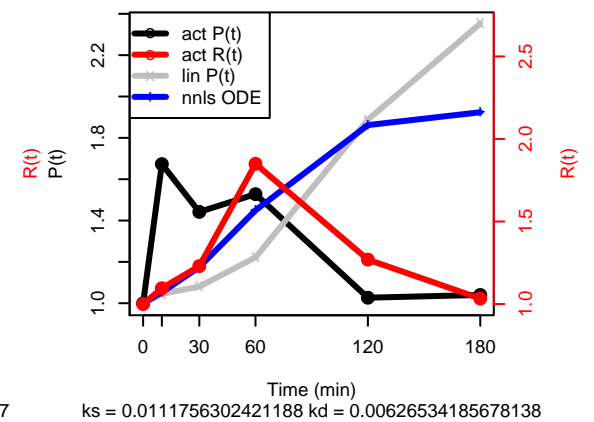

SPBC428.19c

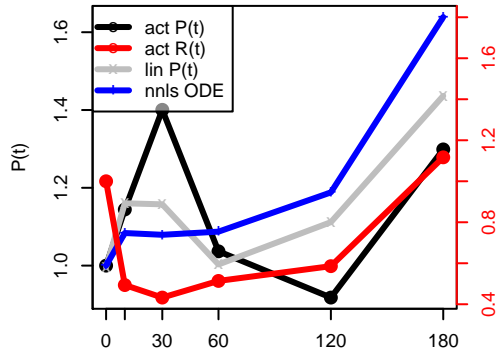

Time (min)  
ks = 0.029065935121394 kd = 0.0126585969896719

SPBC887.04c

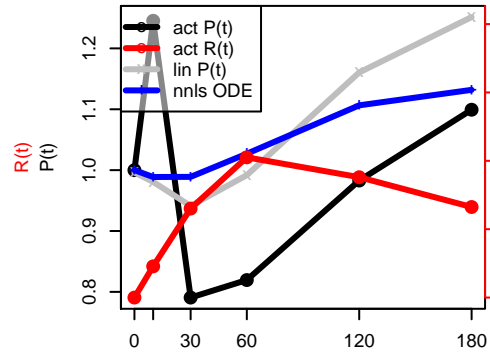

Time (min)  
ks = 0.00337984639651459 kd = 0.00492300011781868

SPBP8B7.19

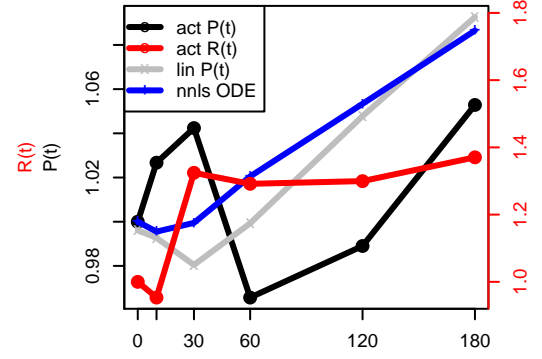

Time (min)  
ks = 0.00350497719970236 kd = 0.00385081766977747

SPCC1223.11

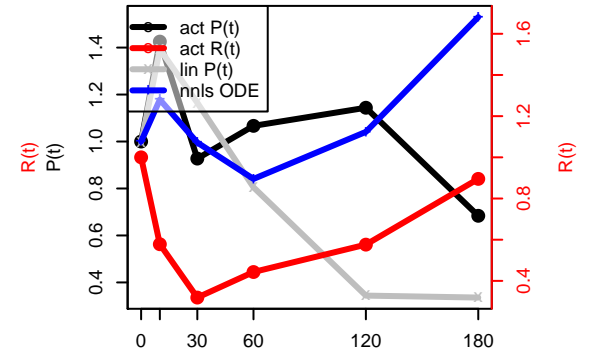

Time (min)  
ks = 0.0802057100987884 kd = 0.0405190573283705

SPCC1322.14c

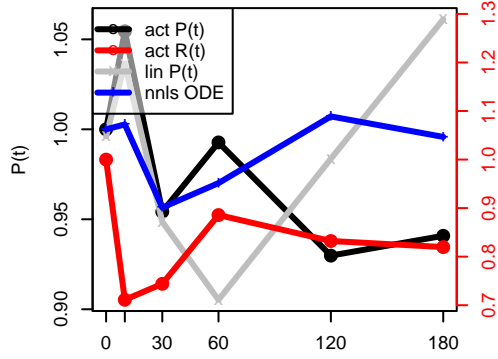

Time (min)  
ks = 0.0251698806611684 kd = 0.0211406164494289

SPCC14G10.04

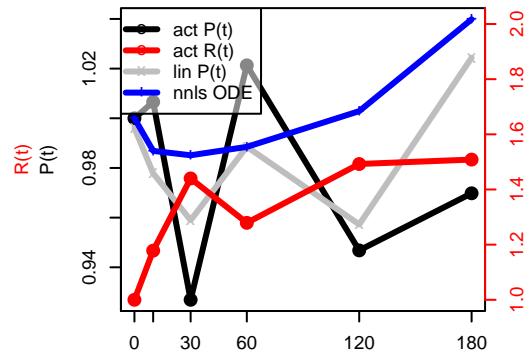

Time (min)  
ks = 0.00522563071910694 kd = 0.00705518079913817

SPCC1919.09

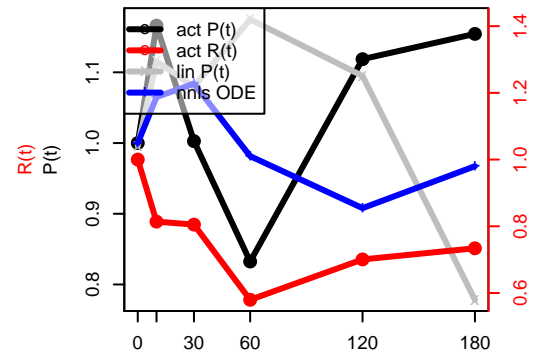

Time (min)  
ks = 0.0445628241398351 kd = 0.0326257768433062

SPCC290.03c

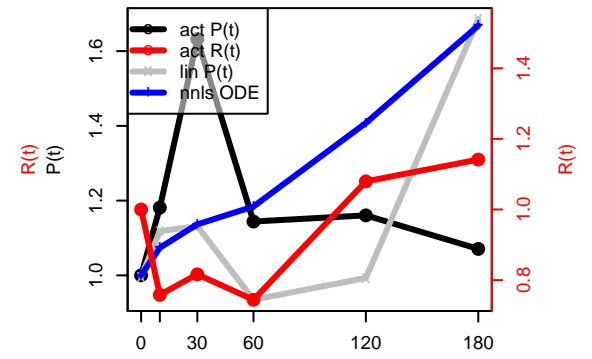

Time (min)  
ks = 0.032465233376032 kd = 0.020263290281022

SPCC576.07

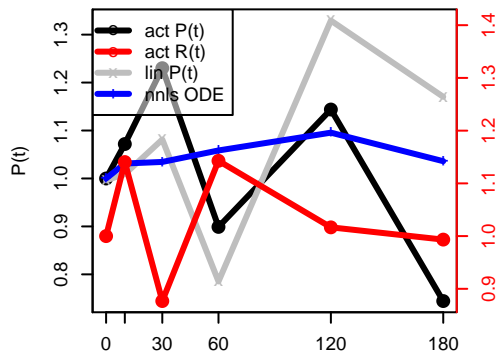

Time (min)  
ks = 0.0324388733537503 kd = 0.0311473316641533

SPCC584.05

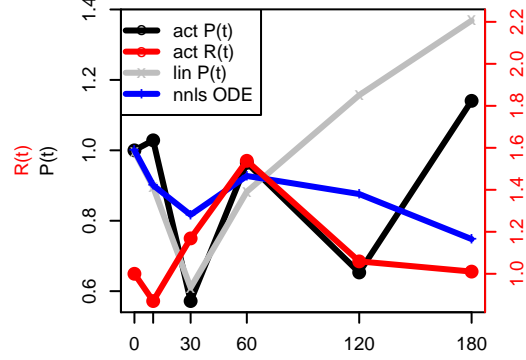

Time (min)  
ks = 0.0248830834110203 kd = 0.0349447120233963

SPCC613.03

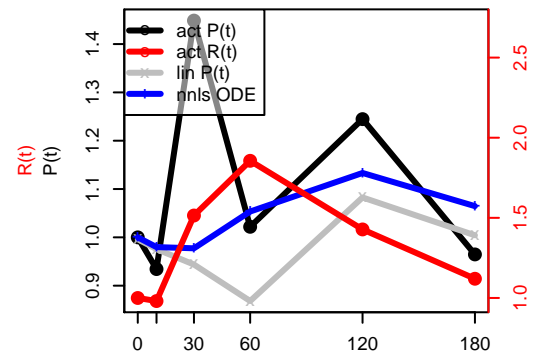

Time (min)  
ks = 0.00679258047813325 kd = 0.00883994260934066

SPCC70.08c

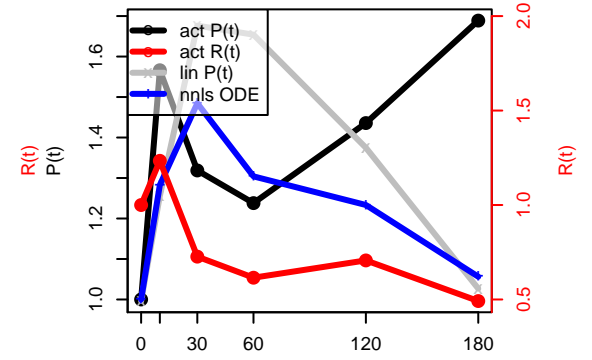

Time (min)  
ks = 0.059096515199775 kd = 0.0331342750718712

SPCC736.04c

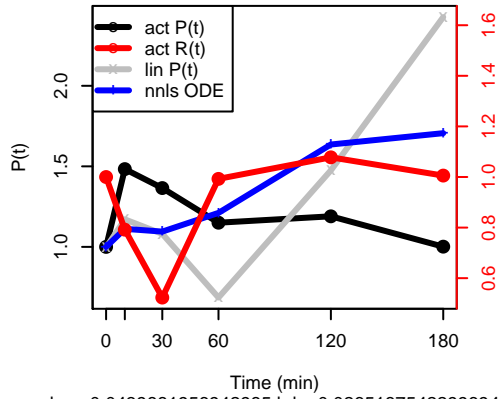

SPCC74.03c

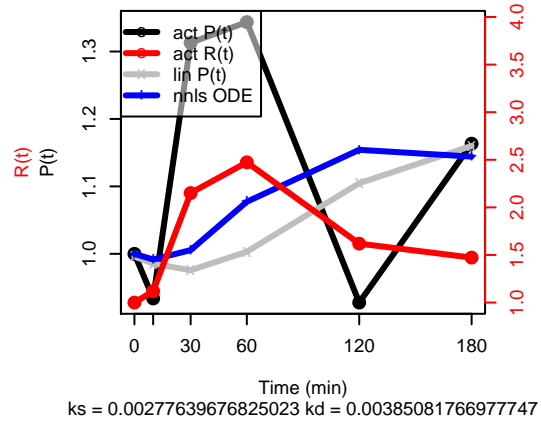

SPCC830.11c

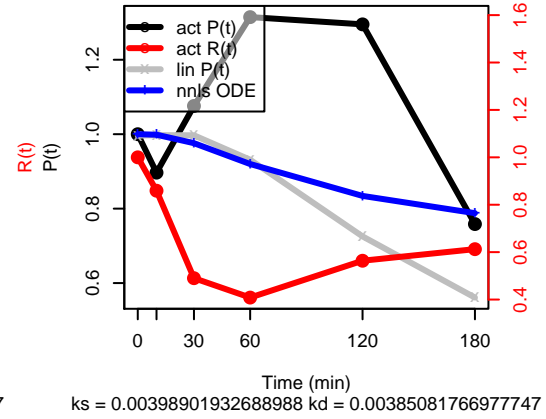

SPAC1071.06

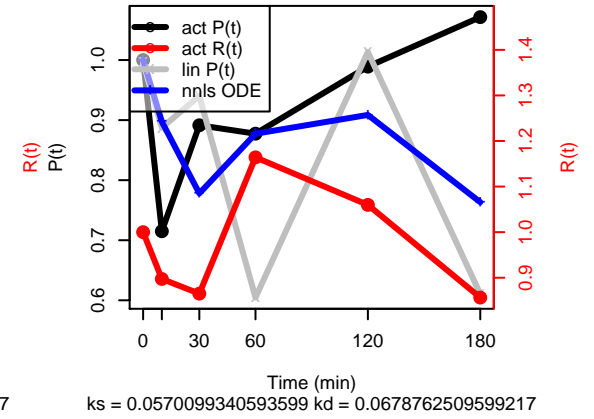

SPAC11D3.07c

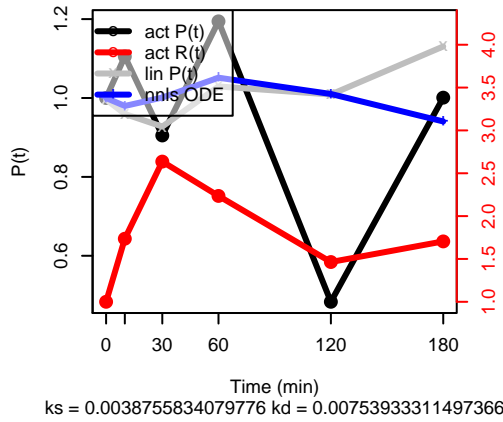

SPAC12G12.02

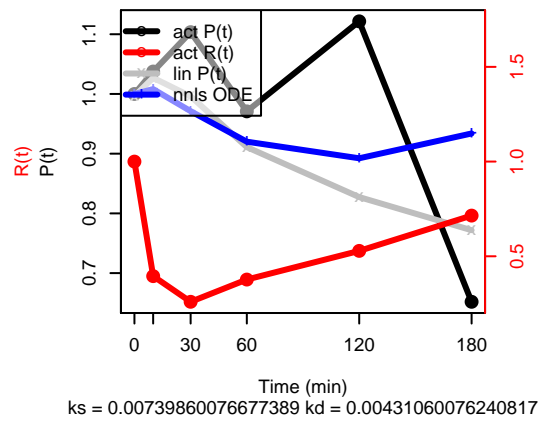

SPAC1565.05

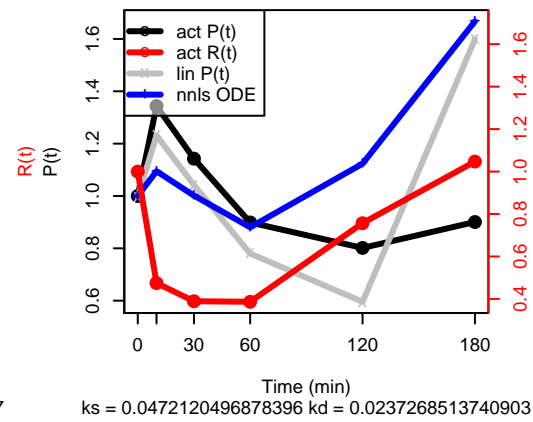

SPAC1687.12c

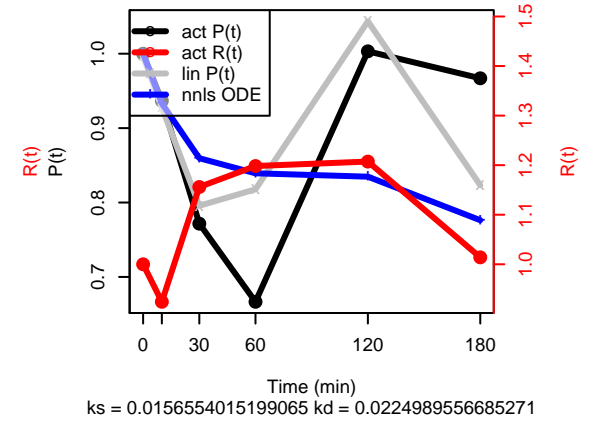

SPAC1687.19c

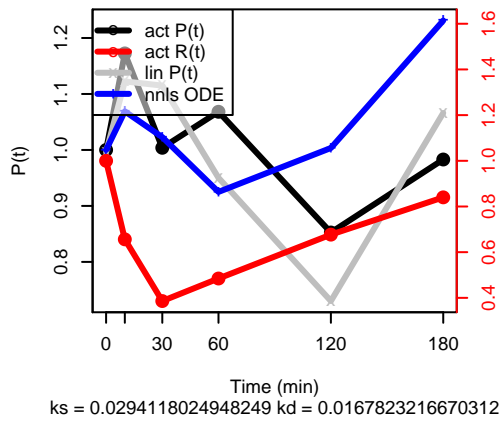

SPAC19B12.11c

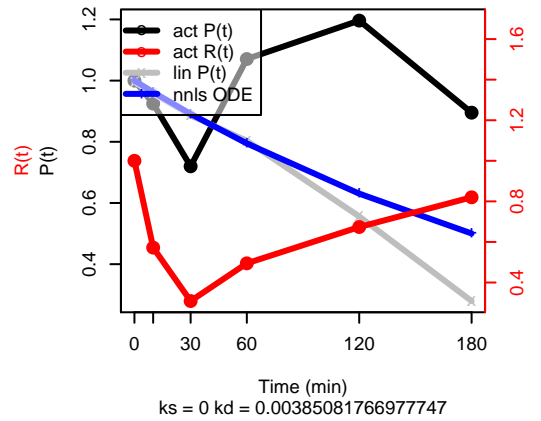

SPAC19G12.07c

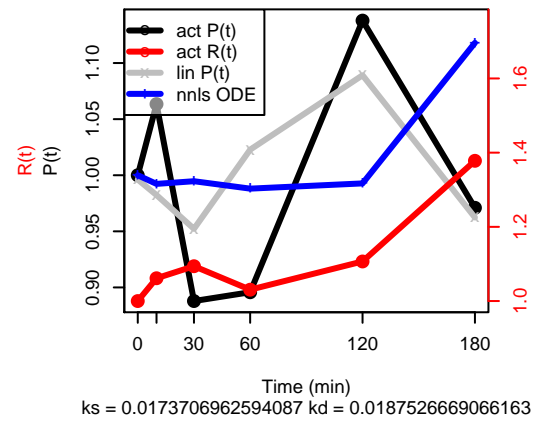

SPAC1B3.01c

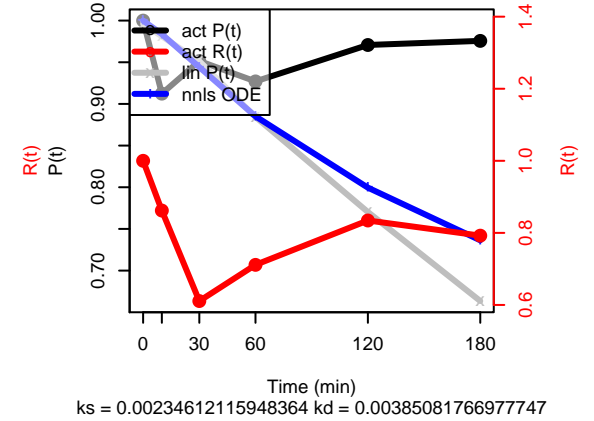



SPAC20G4.02c

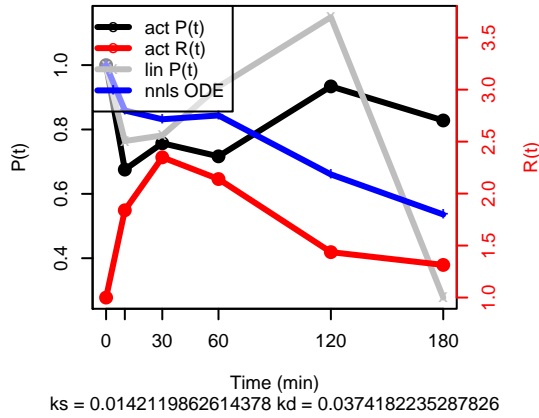

SPAC23C4.19

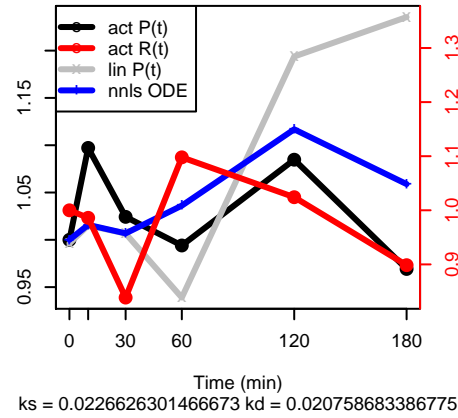

SPAC23H3.03c

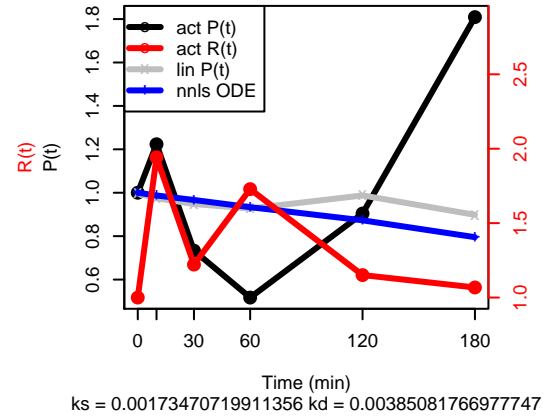

SPAC25B8.08

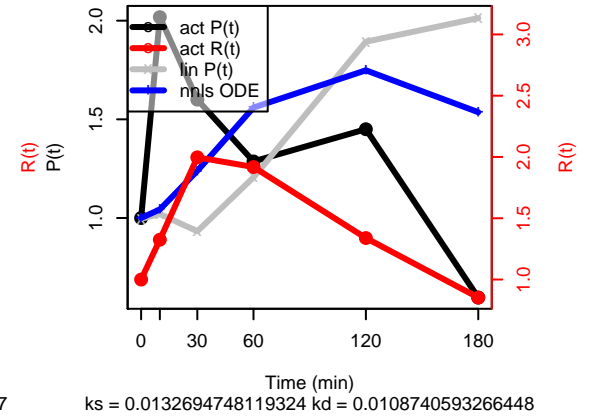

SPAC328.06

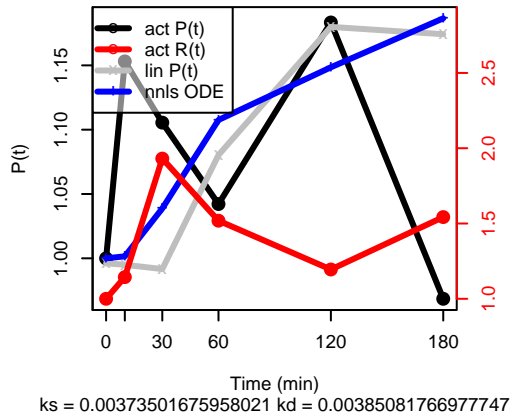

SPAC343.01c

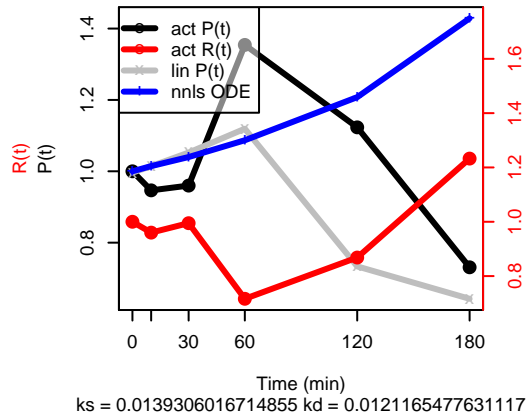

SPAC3C7.12

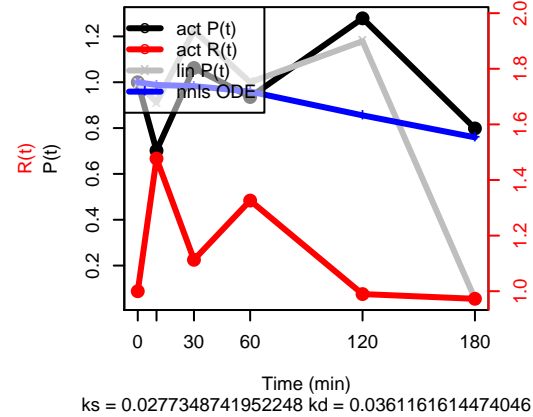

SPAC3G9.05

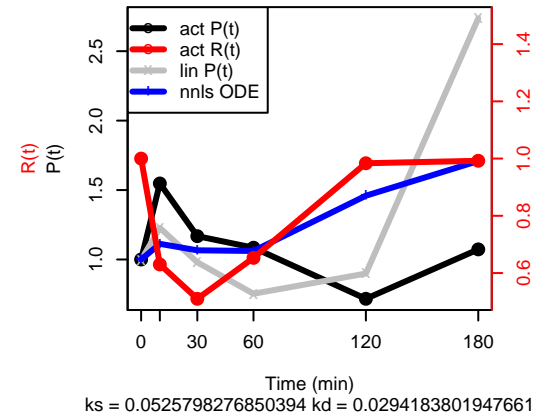

SPAC3G9.15c

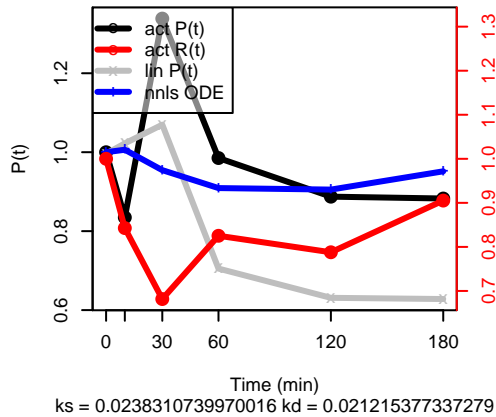

SPAC589.06c

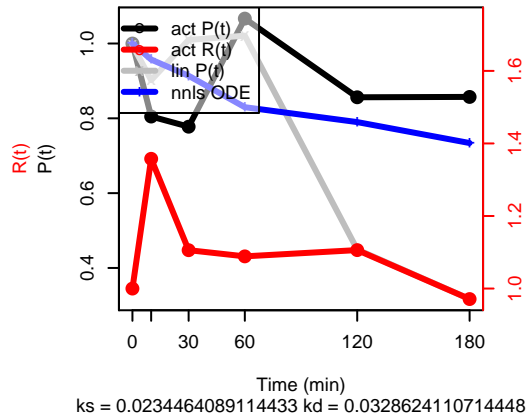

SPAC6G10.04c

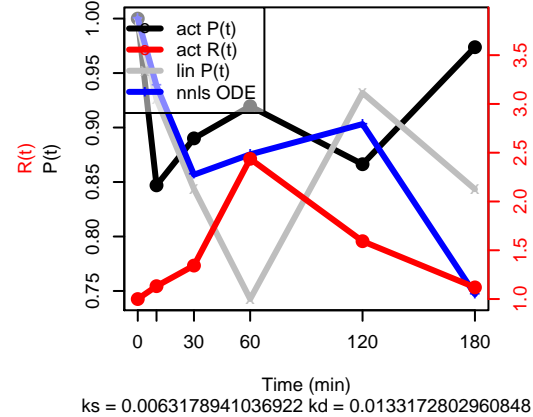

SPAC8E11.02c

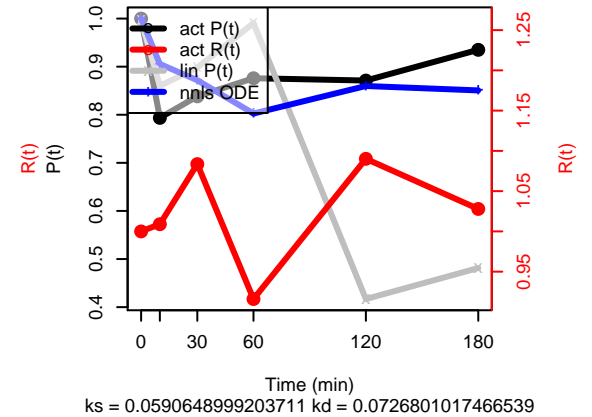

SPACUNK4.14

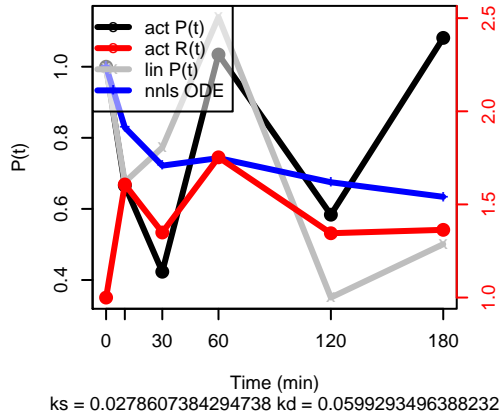

SPBC106.05c

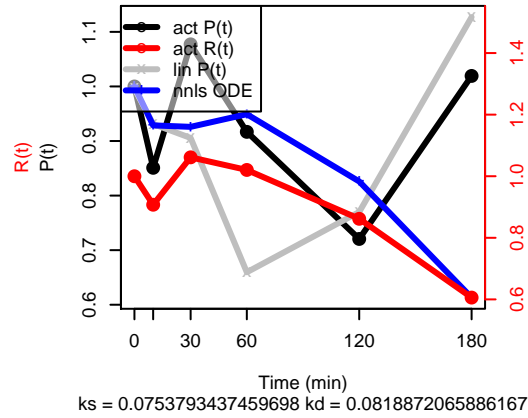

SPBC119.10

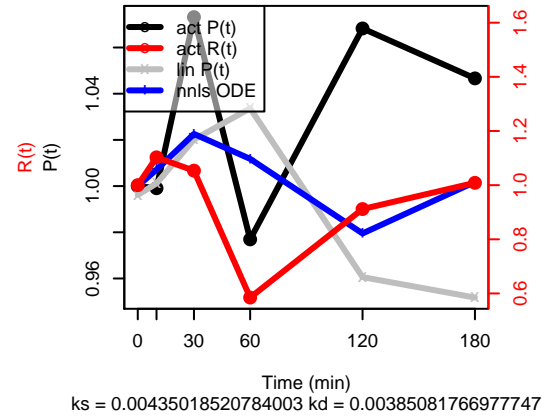

SPBC13G1.01c

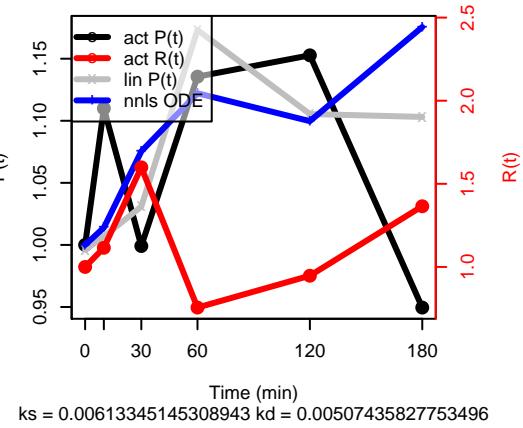

SPBC14C8.16c

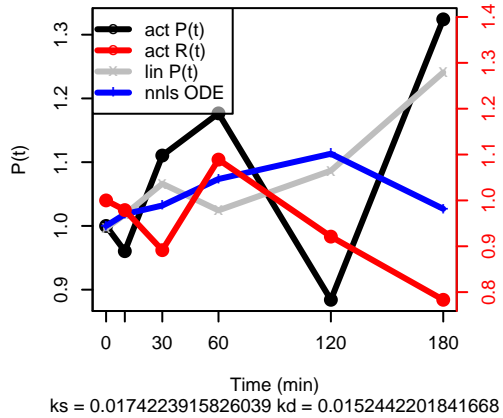

SPBC16H5.05c

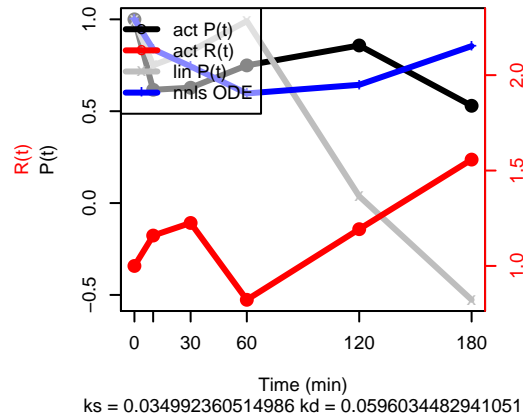

SPBC16H5.10c

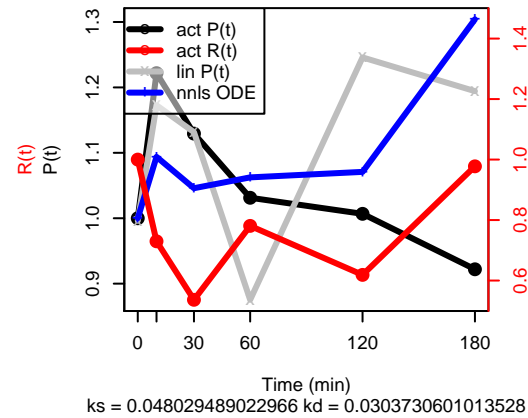

SPBC1703.13c

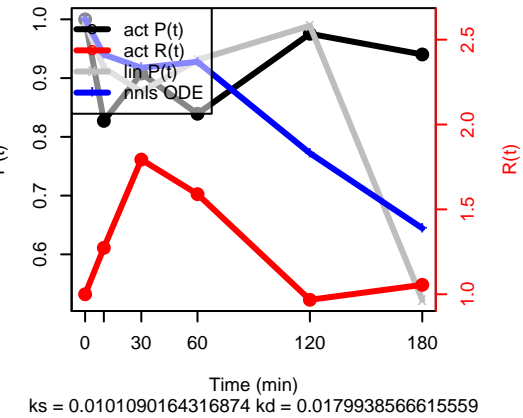

SPBC215.09c

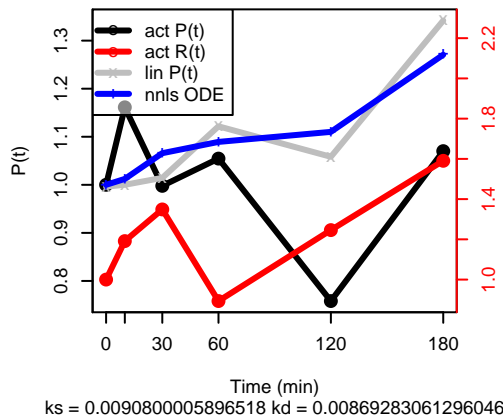

SPBC21D10.12

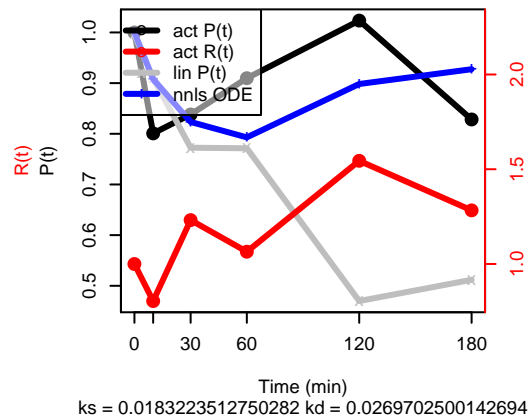

SPBC28F2.11

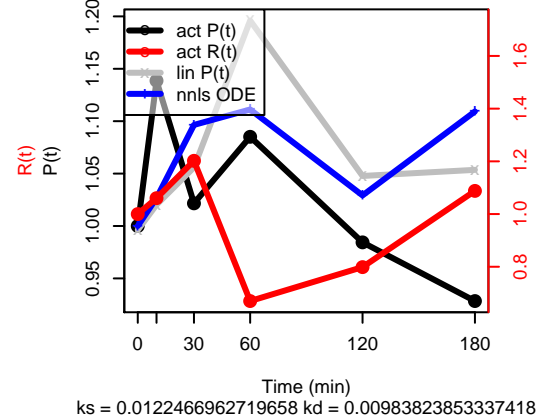

SPBC31F10.11c

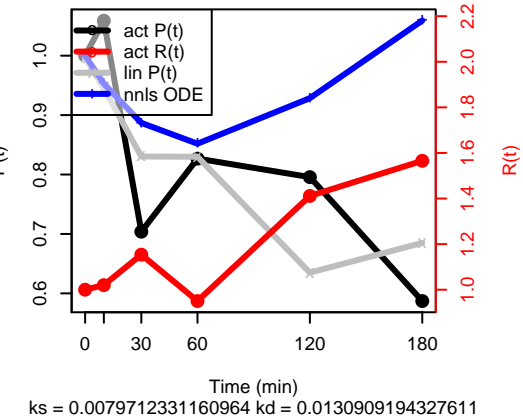

SPBC32F12.04

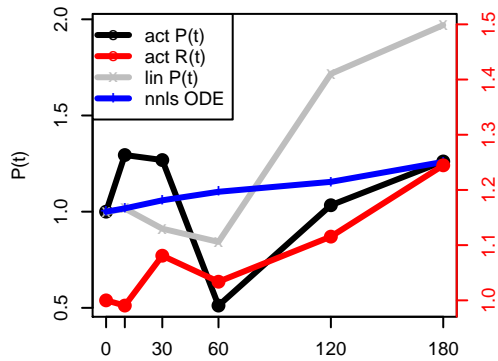

Time (min)  
ks = 0.0259170694112484 kd = 0.023889794563636

SPBC365.06

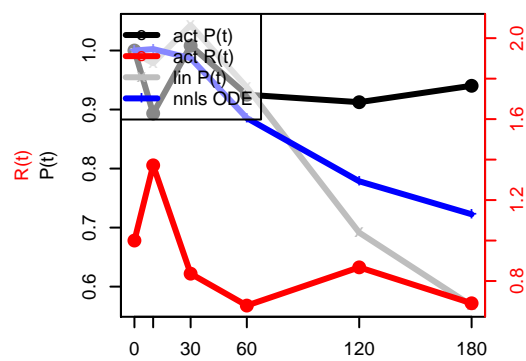

Time (min)  
ks = 0.0100432555857599 kd = 0.0118076270587811

SPBC428.16c

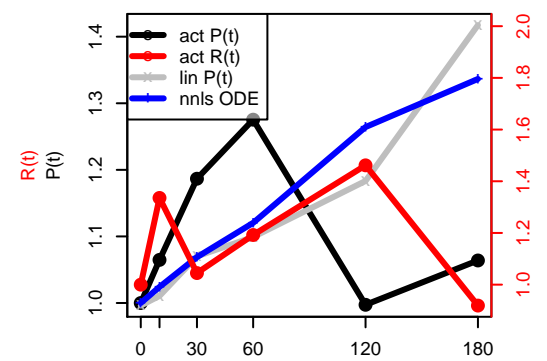

Time (min)  
ks = 0.00529693872851148 kd = 0.00385081766977747

SPBC651.09c

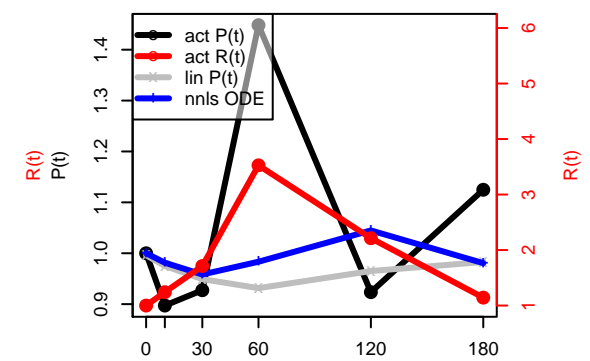

Time (min)  
ks = 0.00174051897068414 kd = 0.00385081766977747

SPBC8D2.12c

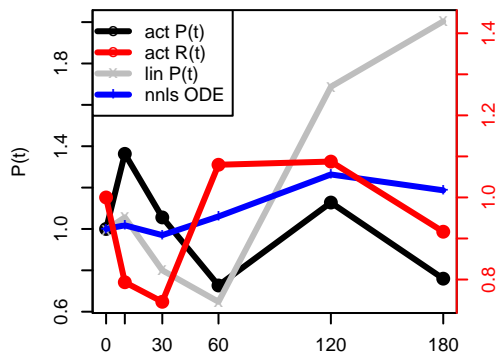

Time (min)  
ks = 0.0367762854824355 kd = 0.030786488570601

SPBC947.13

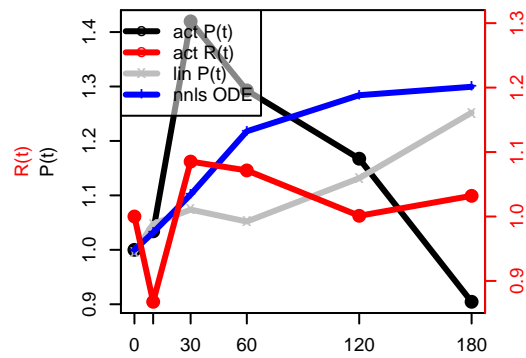

Time (min)  
ks = 0.0239924661049362 kd = 0.0188562885885232

SPBP8B7.15c

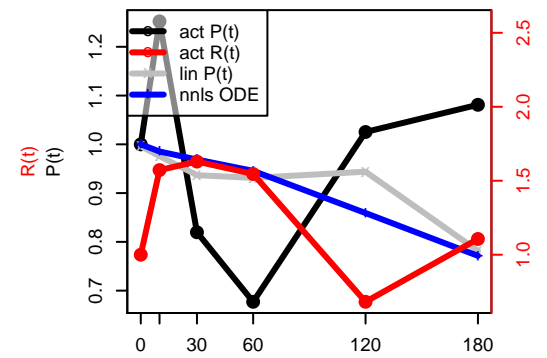

Time (min)  
ks = 0.00182337294253902 kd = 0.00385081766977747

SPCC11E10.07c

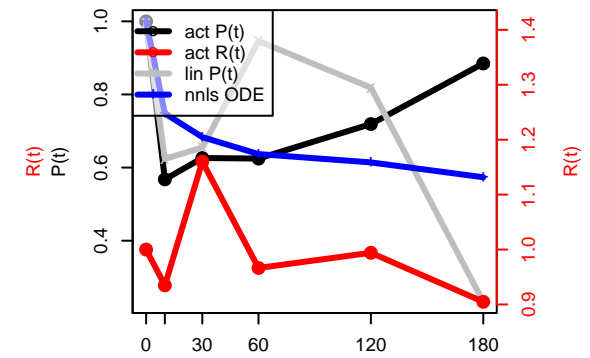

Time (min)  
ks = 0.0618476973050282 kd = 0.0990912953203076

SPCC1322.15

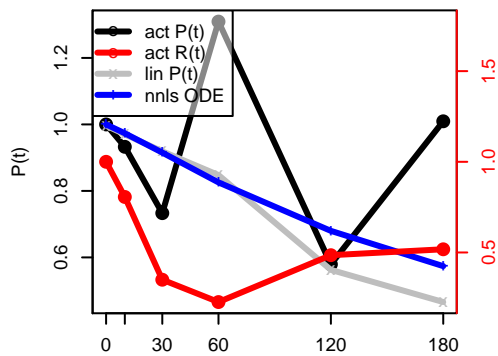

Time (min)  
ks = 0.00127356857290546 kd = 0.00385081766977747

SPCC188.11

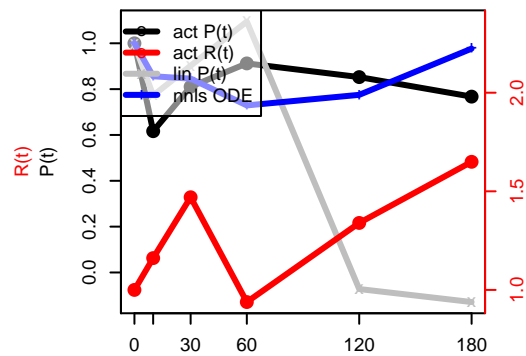

Time (min)  
ks = 0.0372667373893881 kd = 0.0596658780746979

SPCC364.06

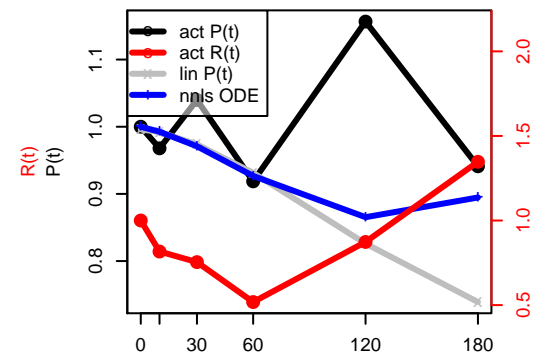

Time (min)  
ks = 0.00343965578036226 kd = 0.00385081766977747

SPCC4B3.16

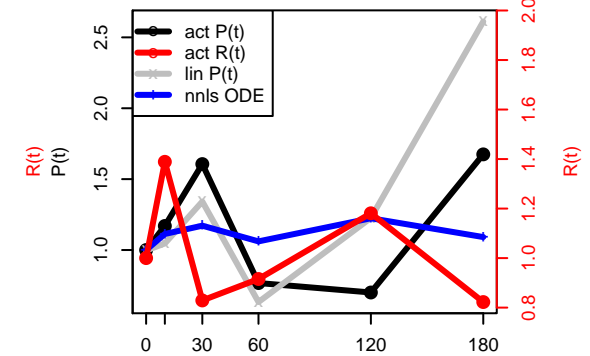

Time (min)  
ks = 0.0407394591760806 kd = 0.0357345395531589

SPCC594.01

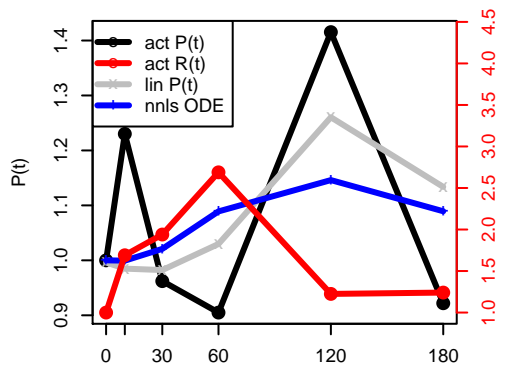

Time (min)  
ks = 0.00272573107048365 kd = 0.00385081766977747

SPCP31B10.08c

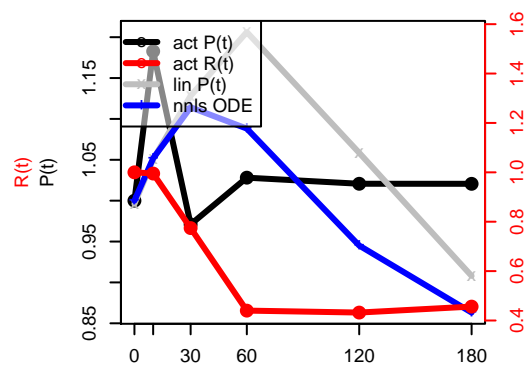

Time (min)  
ks = 0.0137243836085032 kd = 0.00826836651792451

SPAC110.04c

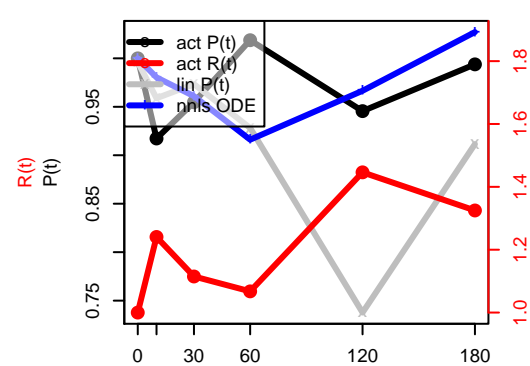

Time (min)  
ks = 0.0128320217889656 kd = 0.0165619652828828

SPAC12B10.03

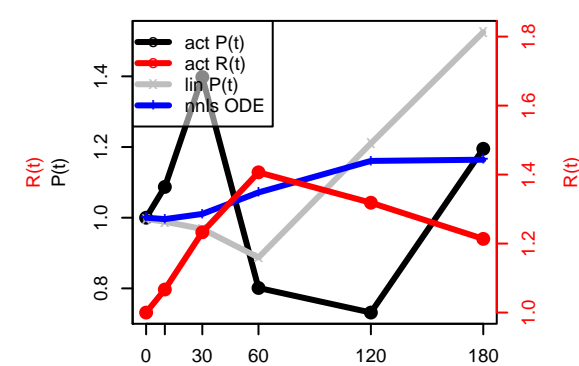

Time (min)  
ks = 0.00988911722322146 kd = 0.0106457874674137

SPAC1834.08

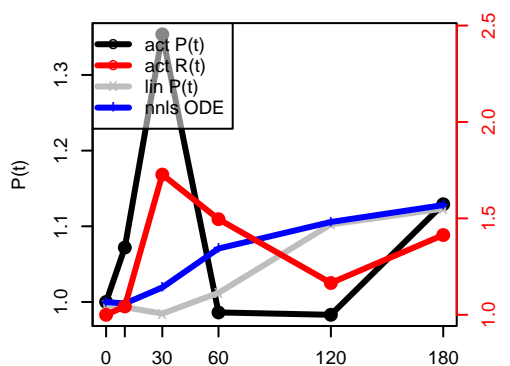

Time (min)  
ks = 0.00354705266167713 kd = 0.00385081766977747

SPAC18B11.04

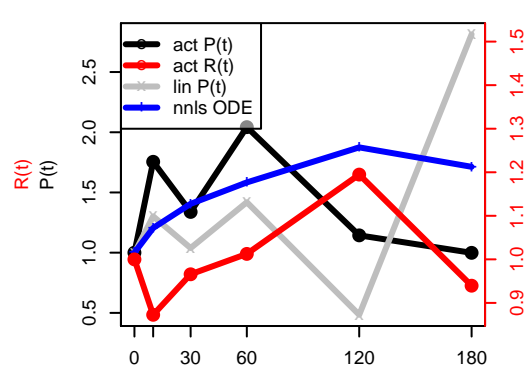

Time (min)  
ks = 0.0757429806122401 kd = 0.0451756809354293

SPAC18G6.05c

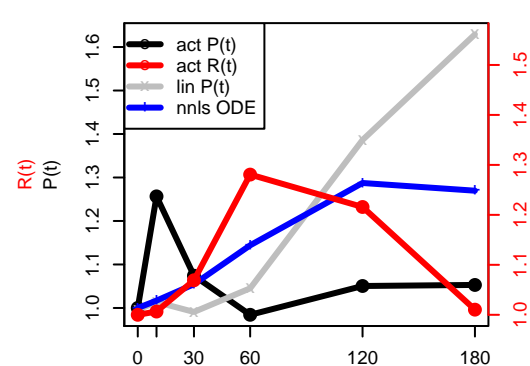

Time (min)  
ks = 0.0133668897248863 kd = 0.0116159872638185

SPAC1952.11c

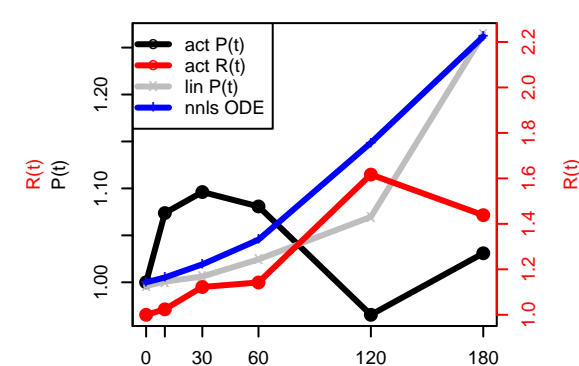

Time (min)  
ks = 0.00430371684956317 kd = 0.00385081766977747

SPAC1952.13

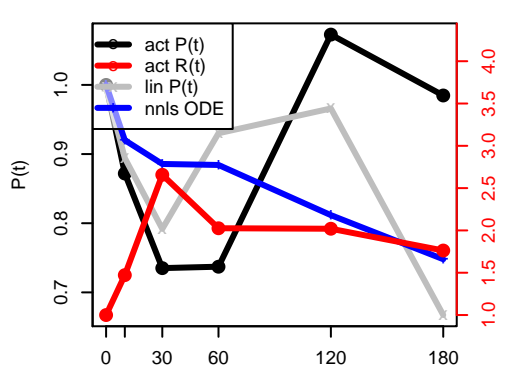

Time (min)  
ks = 0.00629844735892363 kd = 0.0164996042879402

SPAC19B12.09

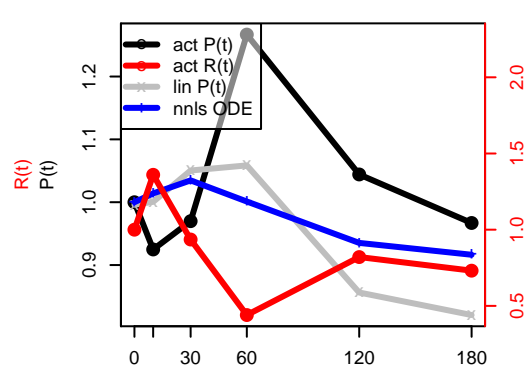

Time (min)  
ks = 0.004766005378493 kd = 0.00431717669295706

SPAC1B3.05

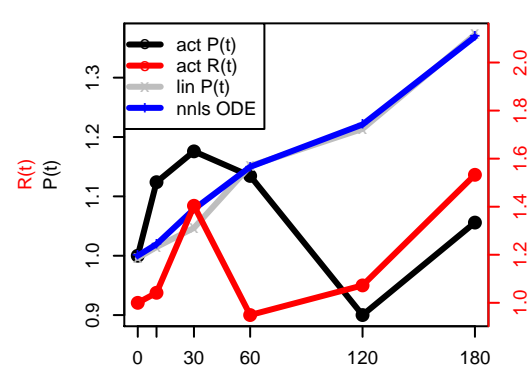

Time (min)  
ks = 0.00570076664313488 kd = 0.00385081766977747

SPAC20G8.09c

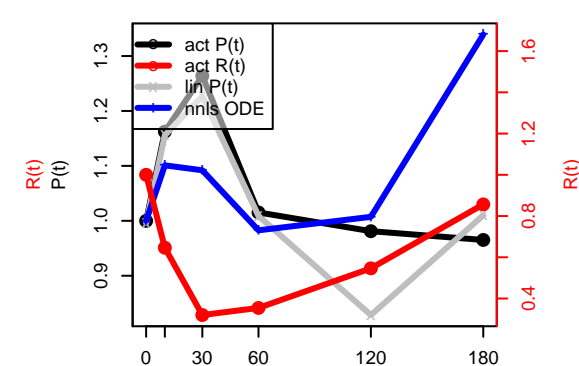

Time (min)  
ks = 0.0290787656508636 kd = 0.013111196828734

SPAC23C11.15

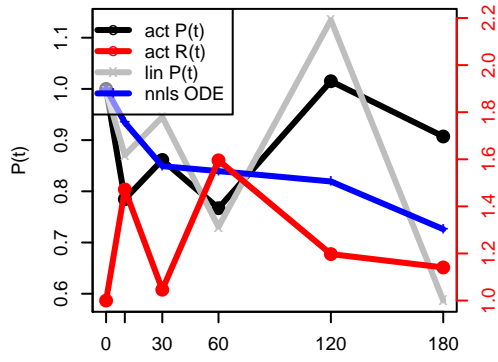

Time (min)  
ks = 0.0197317630955307 kd = 0.0322711198695571

SPAC29A4.11

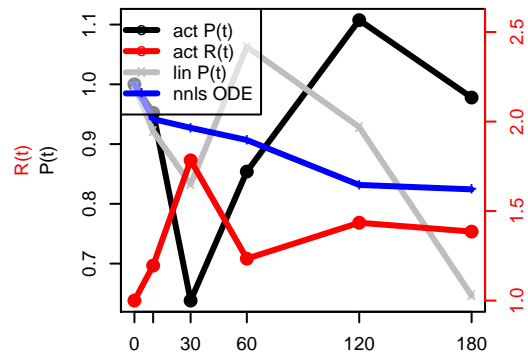

Time (min)  
ks = 0.0108562007307031 kd = 0.0183087133542616

SPAC343.09

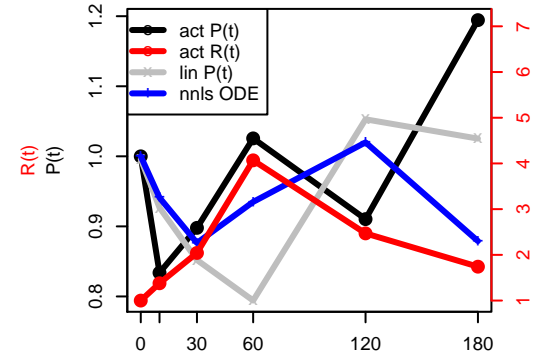

Time (min)  
ks = 0.0037550745398988 kd = 0.0106907426664919

SPAC3A11.02

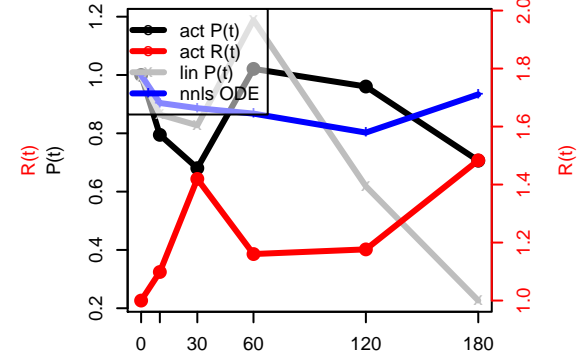

Time (min)  
ks = 0.0284270186424308 kd = 0.0416181633589246

SPAC3A11.11c

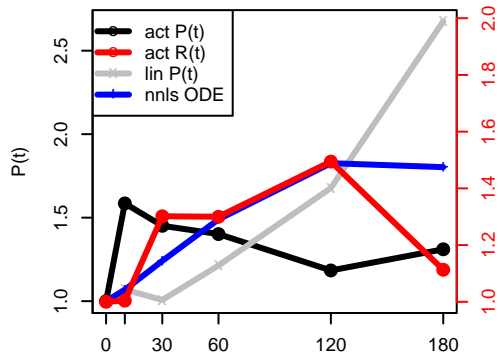

Time (min)  
ks = 0.0254832436399525 kd = 0.0181158806904609

SPAC3G6.03c

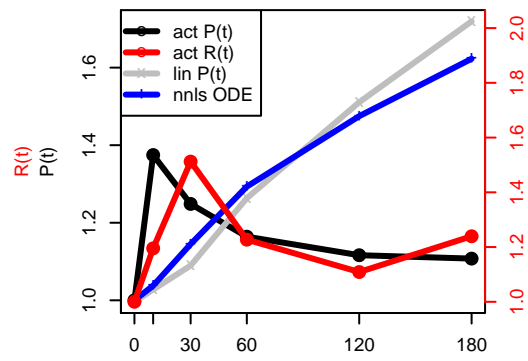

Time (min)  
ks = 0.00701209542183586 kd = 0.00385081766977747

SPAC3G6.04

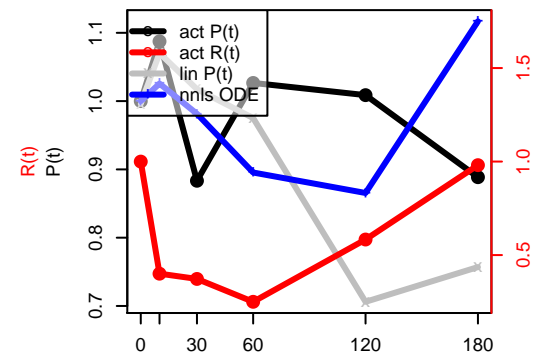

Time (min)  
ks = 0.0155675235387282 kd = 0.00816117477155273

SPAC57A7.05

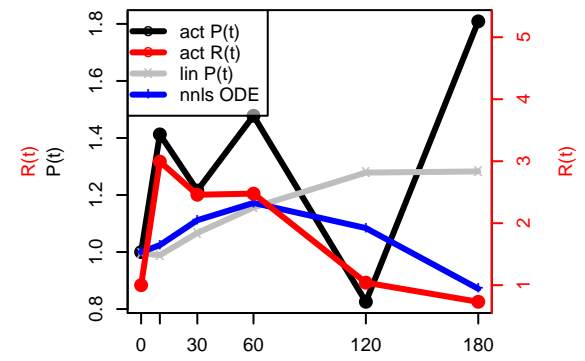

Time (min)  
ks = 0.00311862538785982 kd = 0.00385081766977747

SPAC6F12.17

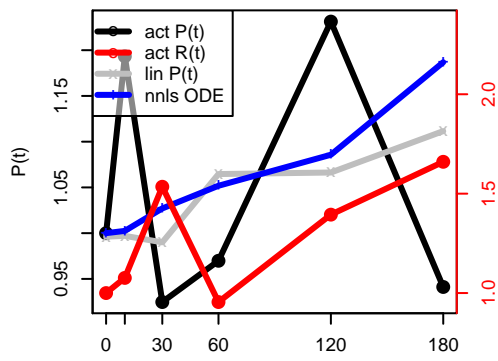

Time (min)  
ks = 0.00394106865949473 kd = 0.00385081766977747

SPBC14F5.04c

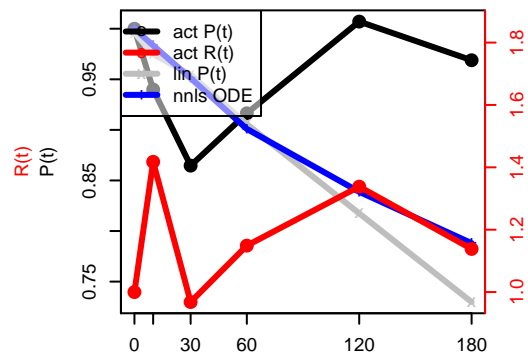

Time (min)  
ks = 0.00206577581771572 kd = 0.0041953994172448

SPBC15D4.09c

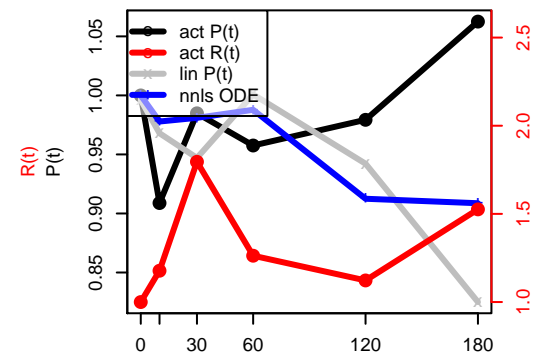

Time (min)  
ks = 0.00563486894109623 kd = 0.00845239344526614

SPBC16C6.06

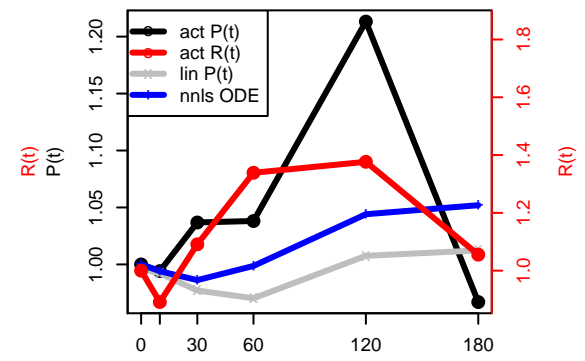

Time (min)  
ks = 0.00345051434326277 kd = 0.00385081766977747

SPBC16D10.05

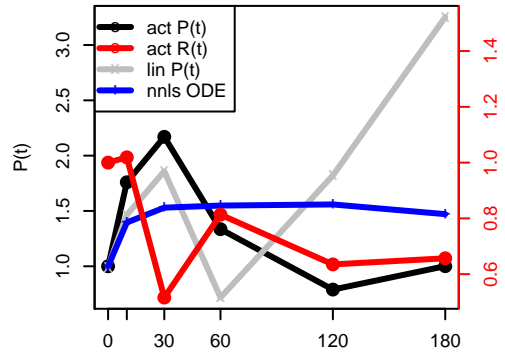

Time (min)  
ks = 0.0843030556697522 kd = 0.0375847823372313

SPBC1815.01

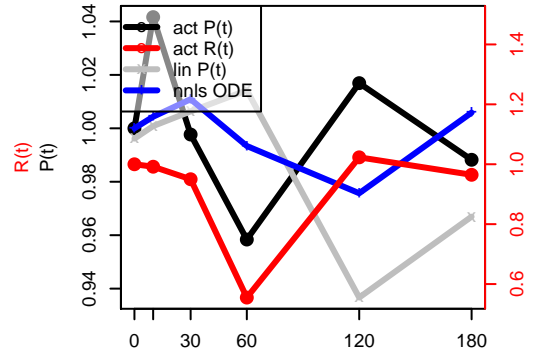

Time (min)  
ks = 0.00432101452276978 kd = 0.00385081766977747

SPBC19C2.13c

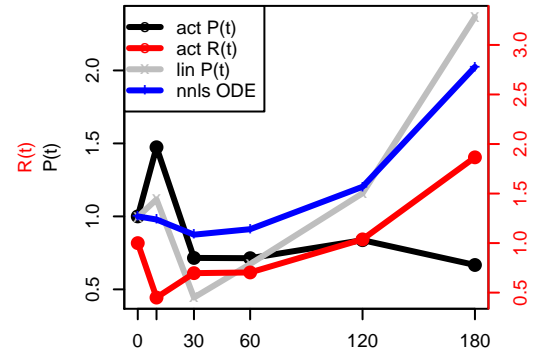

Time (min)  
ks = 0.0501522021048972 kd = 0.0381340376696103

SPBC1A4.05

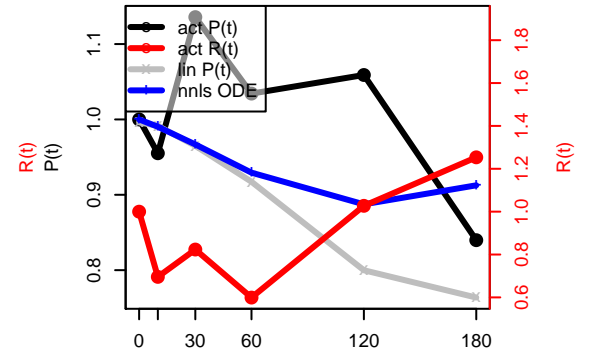

Time (min)  
ks = 0.00338186383686156 kd = 0.00385081766977747

SPBC23G7.07c

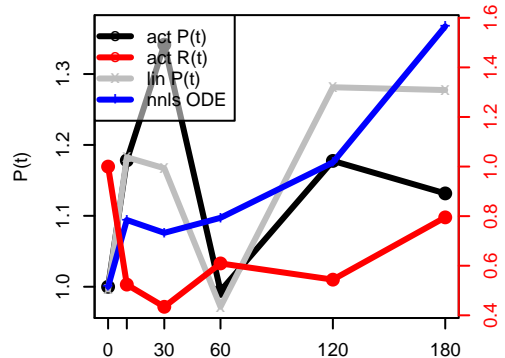

Time (min)  
ks = 0.0347561123791589 kd = 0.0161111761150309

SPBC25B2.07c

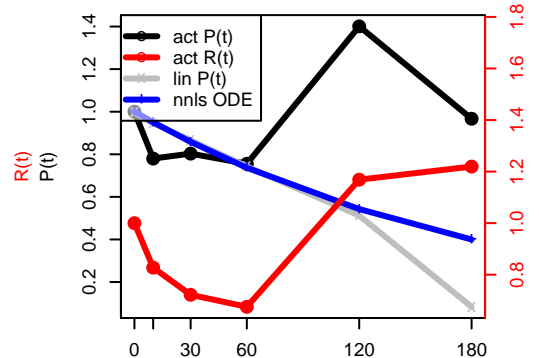

Time (min)  
ks = 0 kd = 0.00509566387856531

SPBC29A10.13

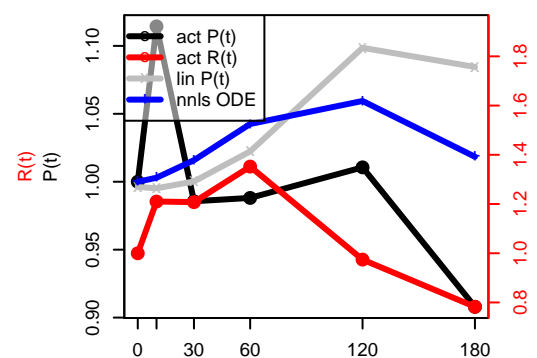

Time (min)  
ks = 0.00375376537457302 kd = 0.00385081766977747

SPBC29A3.06

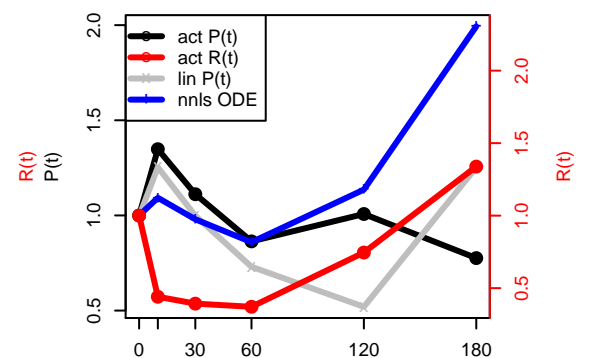

Time (min)  
ks = 0.0521836715750411 kd = 0.0264982624202733

SPBC2G5.01

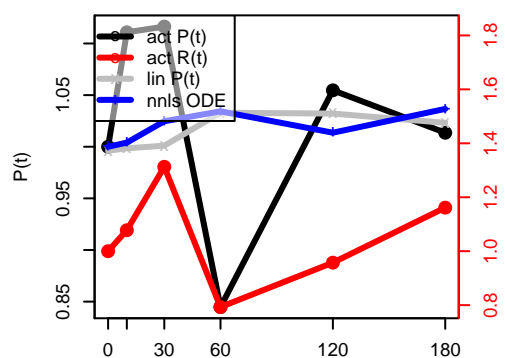

Time (min)  
ks = 0.00408540382682149 kd = 0.00385081766977747

SPBC30D10.02

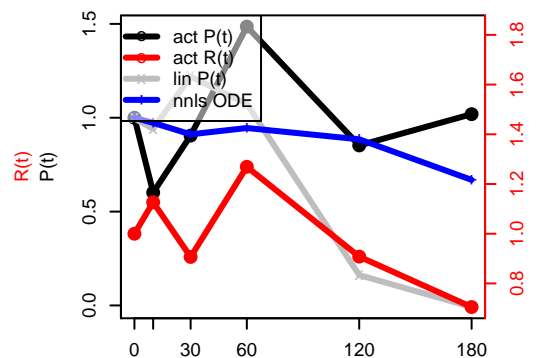

Time (min)  
ks = 0.0327522951053267 kd = 0.0382062939410121

SPBC32H8.10

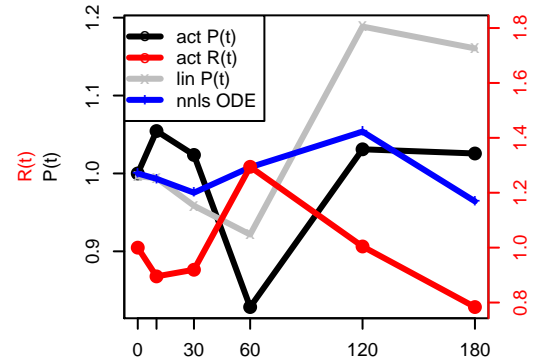

Time (min)  
ks = 0.00989734247096195 kd = 0.0100932880931382

SPBC3B9.03

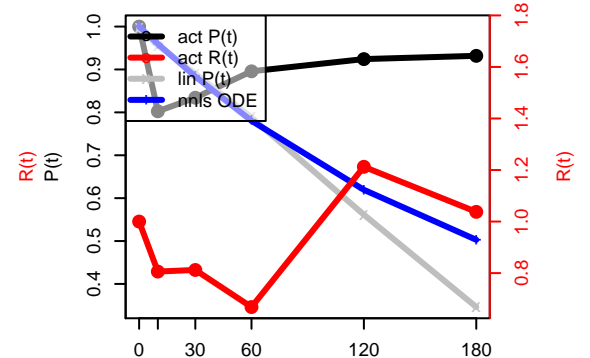

Time (min)  
ks = 0.000590013496361962 kd = 0.00465678795763276

SPBC409.15

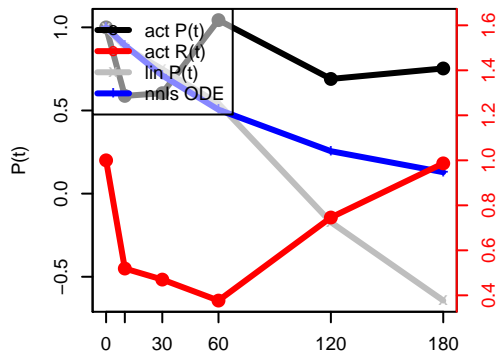

Time (min)  
ks = 0 kd = 0.0113936777831051

SPBC646.07c

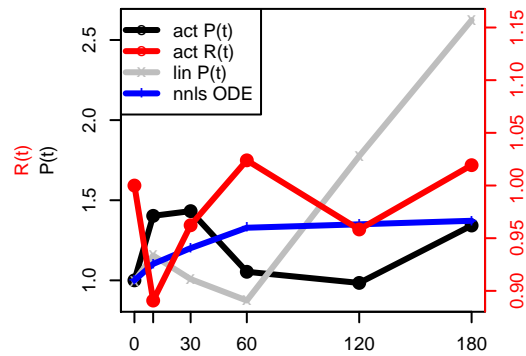

Time (min)  
ks = 0.0579336699484319 kd = 0.0420422508962601

SPBC646.09c

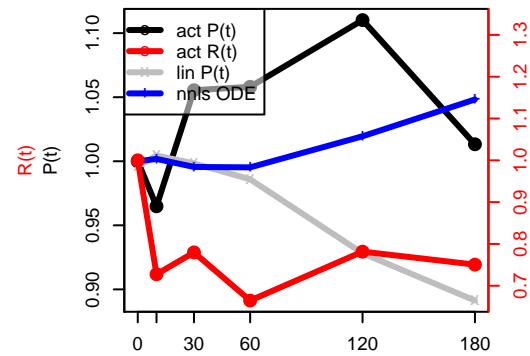

Time (min)  
ks = 0.00468267693375909 kd = 0.00385081766977747

SPBC725.08

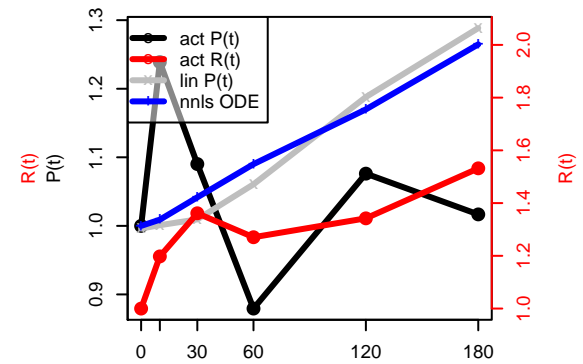

Time (min)  
ks = 0.00433578568127229 kd = 0.00385081766977747

SPBC800.05c

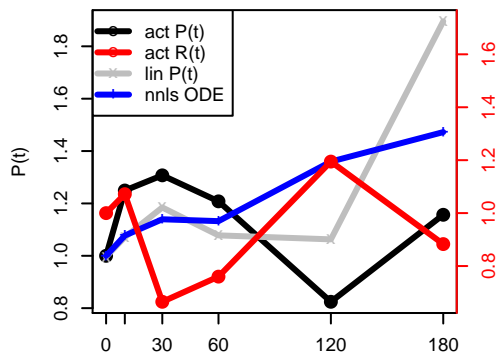

Time (min)  
ks = 0.0207830125580982 kd = 0.0132864320409843

SPBC9B6.09c

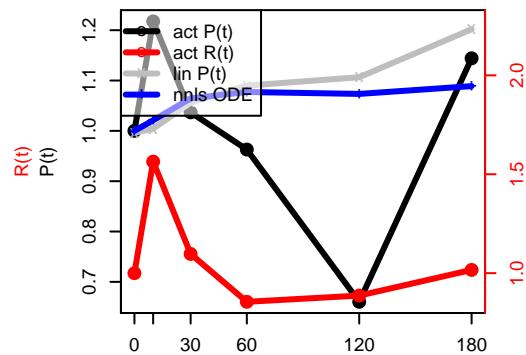

Time (min)  
ks = 0.00466028400531498 kd = 0.00385081766977747

SPBC9B6.11c

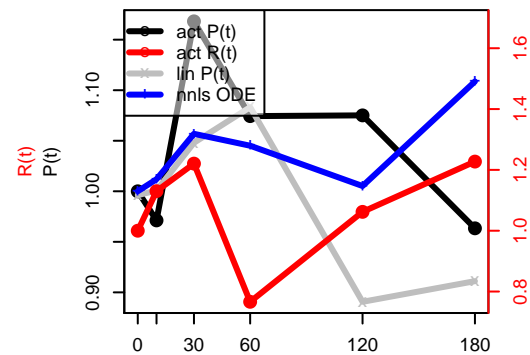

Time (min)  
ks = 0.0120304529467862 kd = 0.0115673215237443

SPCC1450.12

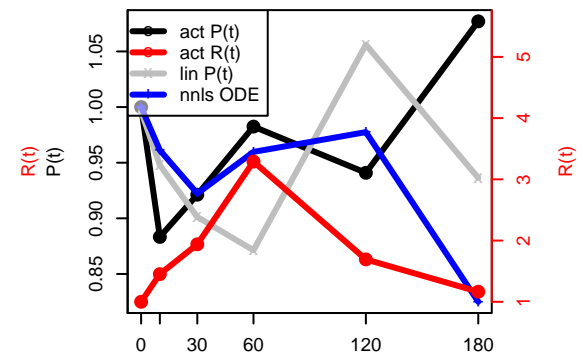

Time (min)  
ks = 0.00338918389373259 kd = 0.00821644351302125

SPCC188.03

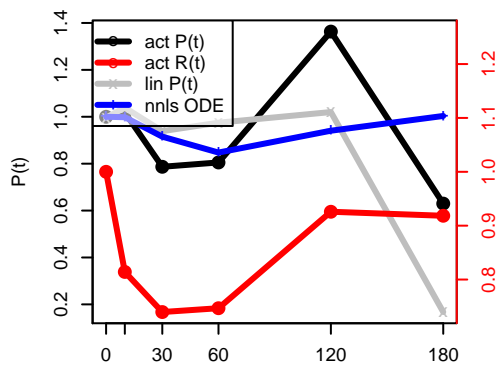

Time (min)  
ks = 0.0457665721071441 kd = 0.0415072496259416

SPCC4G3.16

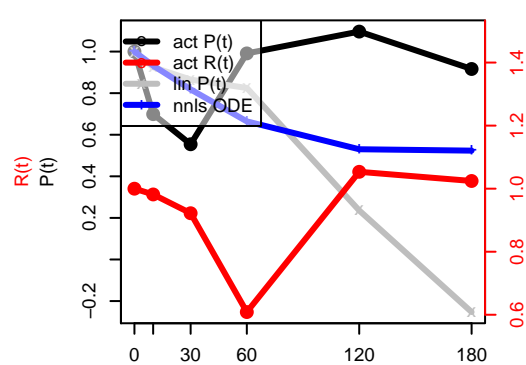

Time (min)  
ks = 0.00714407695218787 kd = 0.0142948910053875

SPCC737.08

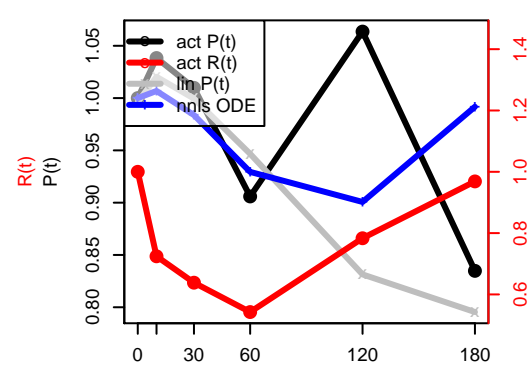

Time (min)  
ks = 0.0113176364673114 kd = 0.00889906092323706

SPCC777.13

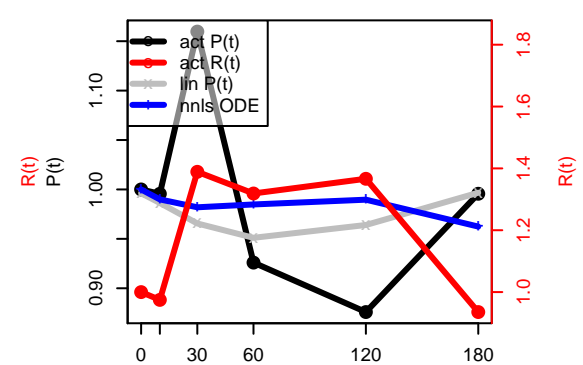

Time (min)  
ks = 0.00286746625477432 kd = 0.00385081766977747



SPCP1E11.09c

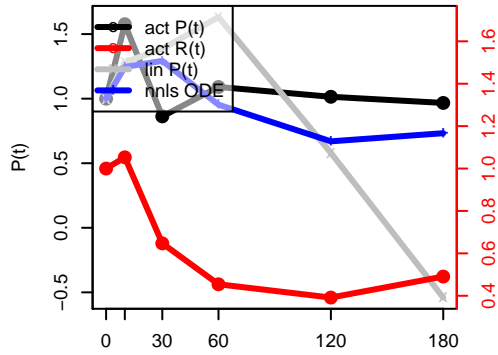

Time (min)  
ks = 0.0767215488126275 kd = 0.048016003859761

SPAC17G8.04c

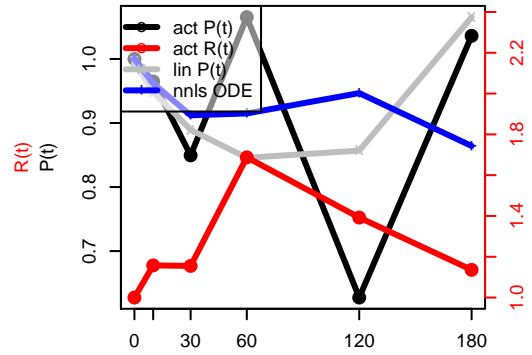

Time (min)  
ks = 0.00843923134071788 kd = 0.0131918677829157

SPAC1F7.02c

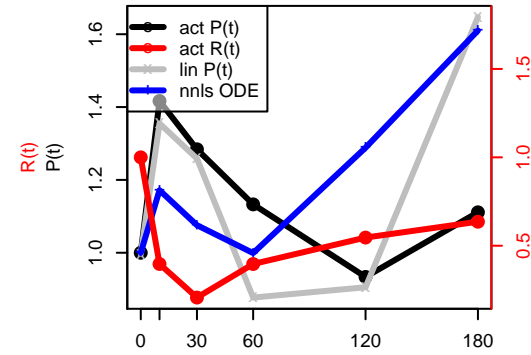

Time (min)  
ks = 0.0545993898910175 kd = 0.018696849632007

SPAC22G7.10

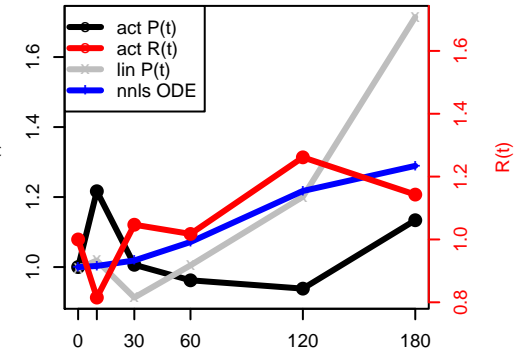

Time (min)  
ks = 0.019969095062018 kd = 0.0177238531084538

SPAC23H3.10

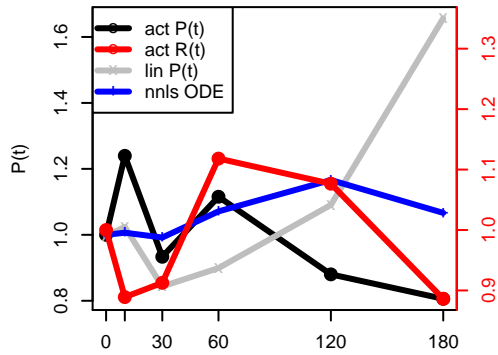

Time (min)  
ks = 0.0355593052720363 kd = 0.0327822072419185

SPAC4F10.15c

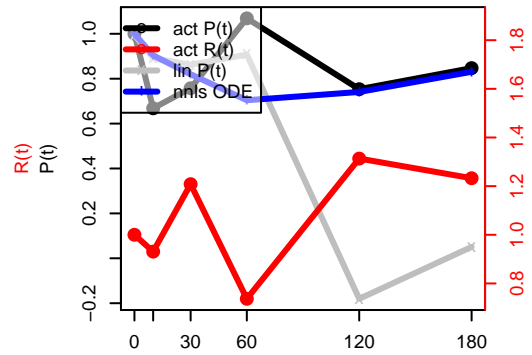

Time (min)  
ks = 0.0209457258736763 kd = 0.031401192051901

SPAC5H10.10

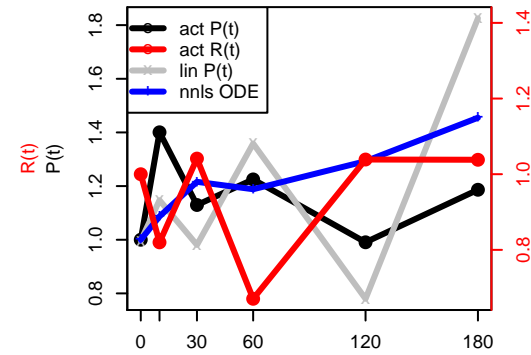

Time (min)  
ks = 0.0507968886923241 kd = 0.0356813808176269

SPAC5H10.12c

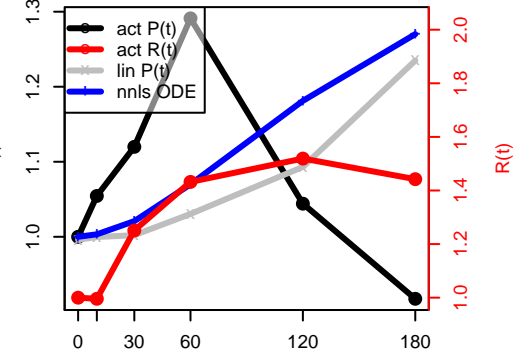

Time (min)  
ks = 0.00420176179465218 kd = 0.00385081766977747

SPAC630.09c

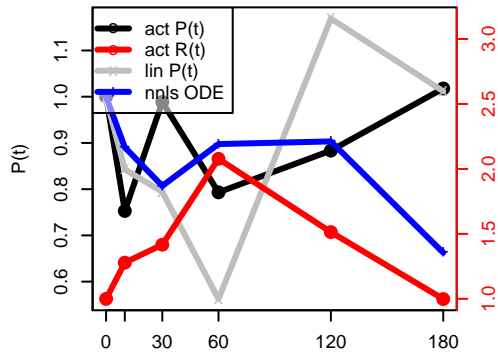

Time (min)  
ks = 0.0173359502358636 kd = 0.0326695296747907

SPAC7D4.04

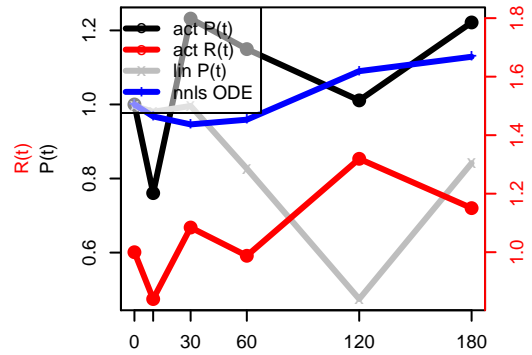

Time (min)  
ks = 0.0250341879506209 kd = 0.0266169910340977

SPAC821.11

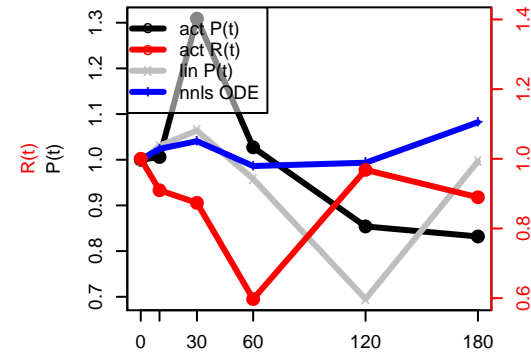

Time (min)  
ks = 0.018379527385536 kd = 0.0149578467510577

SPBC1105.02c

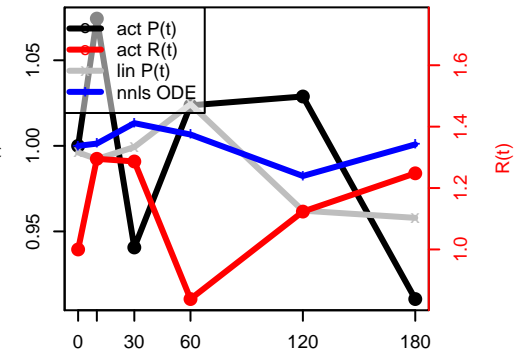

Time (min)  
ks = 0.00346452670884615 kd = 0.00385081766977747

SPBC1703.05

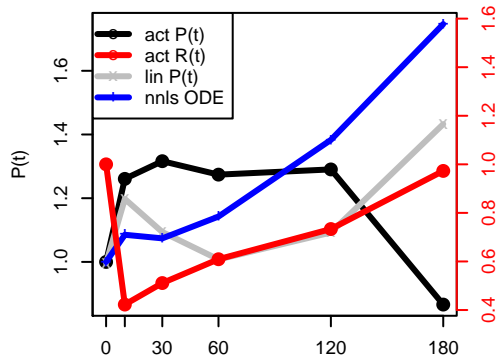

Time (min)  
ks = 0.036491254662689 kd = 0.0163469225385871

SPBC19F8.03c

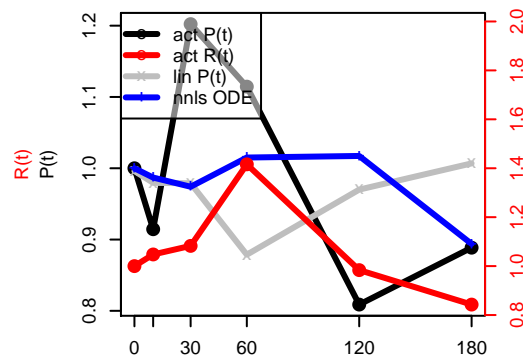

Time (min)  
ks = 0.011196232581936 kd = 0.0128595315798499

SPBC28F2.02

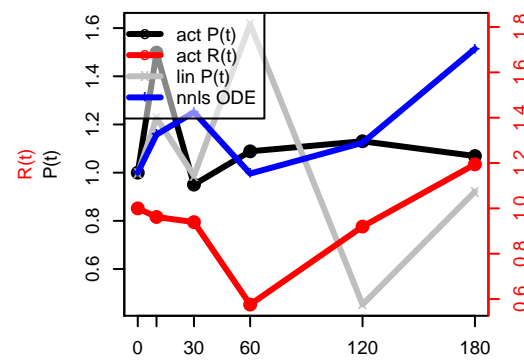

Time (min)  
ks = 0.0868056910818766 kd = 0.0637327044427422

SPBC32F12.06

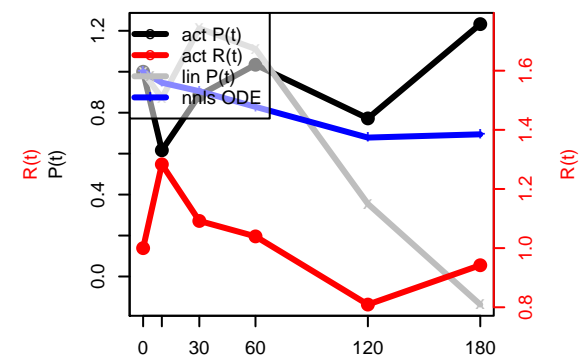

Time (min)  
ks = 0.0368843978849629 kd = 0.0492666223693661

SPBC337.14

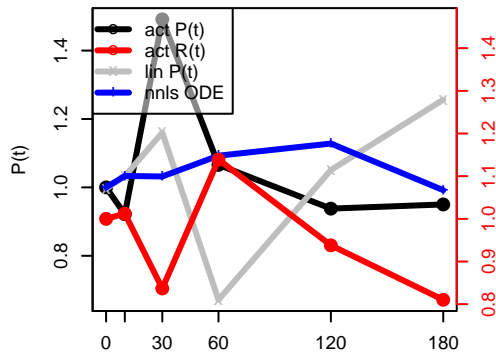

Time (min)  
ks = 0.0332286523493525 kd = 0.0295735162042381

SPBC3D6.12

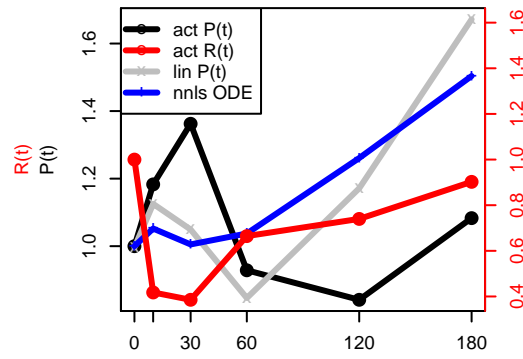

Time (min)  
ks = 0.0249282929028193 kd = 0.0120138679892974

SPBC3H7.03c

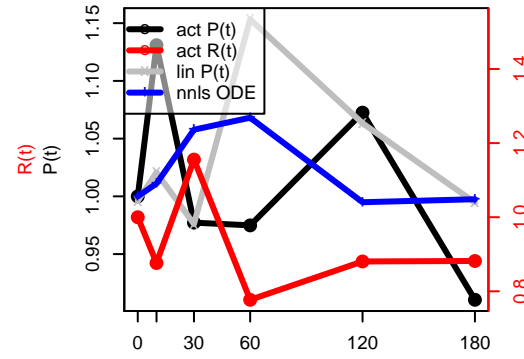

Time (min)  
ks = 0.0196842215117553 kd = 0.0172289394841564

SPBC577.06c

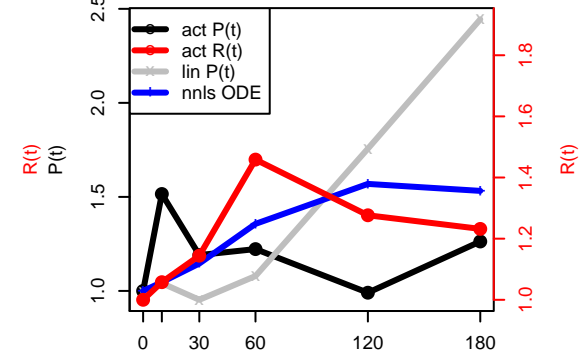

Time (min)  
ks = 0.0245167046776354 kd = 0.0200219577960076

SPBC660.16

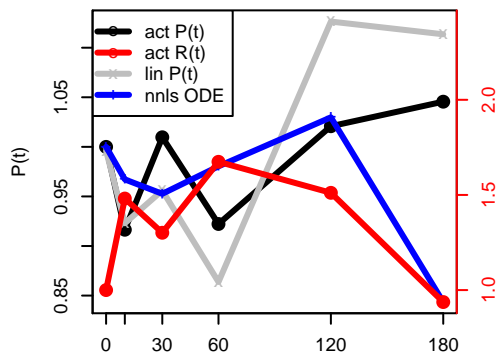

Time (min)  
ks = 0.0147970877766422 kd = 0.0221151292342617

SPBP16F5.07

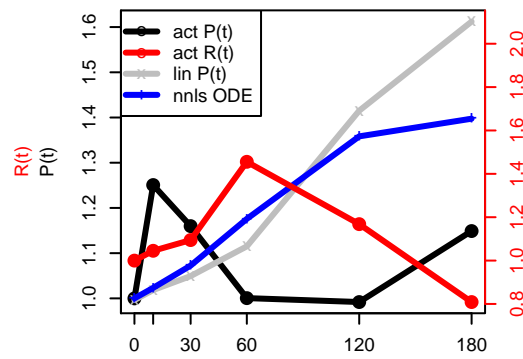

Time (min)  
ks = 0.00608245492228773 kd = 0.00385081766977747

SPCC1235.14

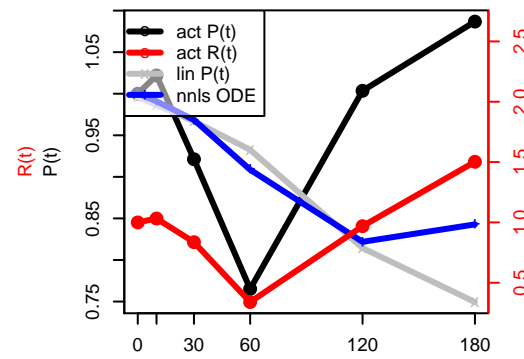

Time (min)  
ks = 0.00287194645168857 kd = 0.00385081766977747

SPCC18.06c

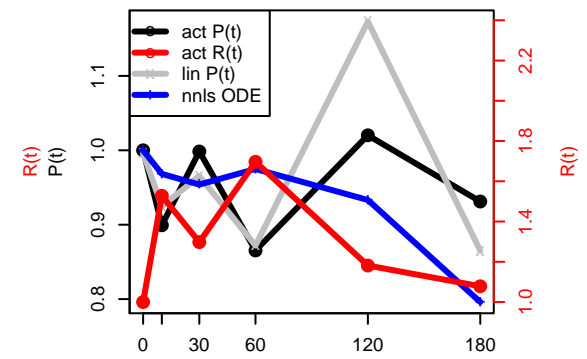

Time (min)  
ks = 0.0134863548689616 kd = 0.0206470681971883

SPCC18.12c

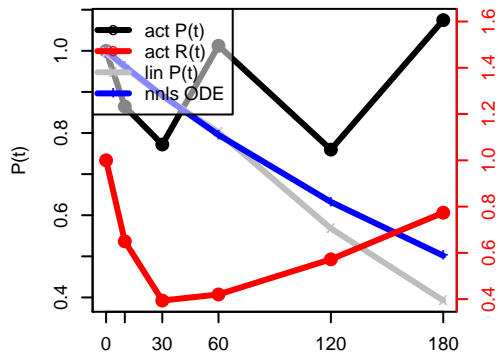

Time (min)  
ks = 0 kd = 0.00385081766977747

SPAC1002.03c

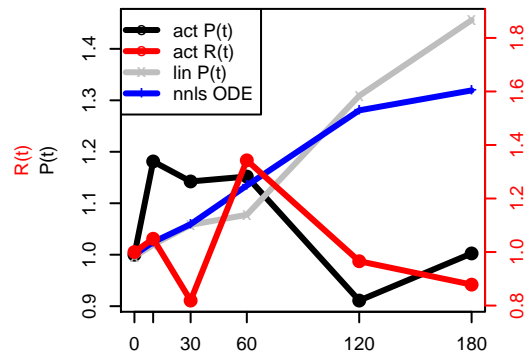

Time (min)  
ks = 0.0061721831982931 kd = 0.00385081766977747

SPAC1093.05

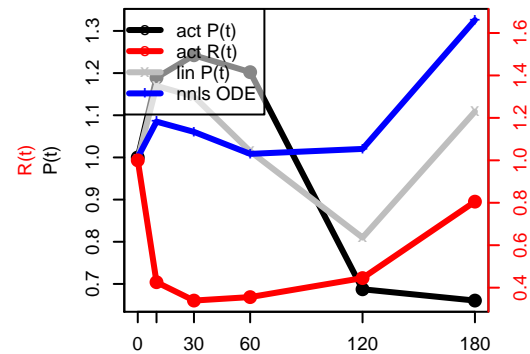

Time (min)  
ks = 0.0286563537463468 kd = 0.0113138954632418

SPAC16E8.04c

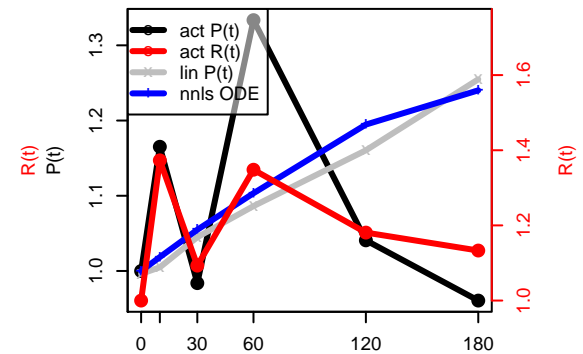

Time (min)  
ks = 0.00472593672747336 kd = 0.00385081766977747

SPAC17G6.14c

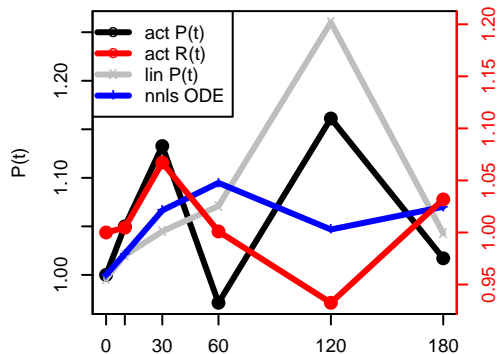

Time (min)  
ks = 0.0279708847790151 kd = 0.0255811453281572

SPAC17H9.16

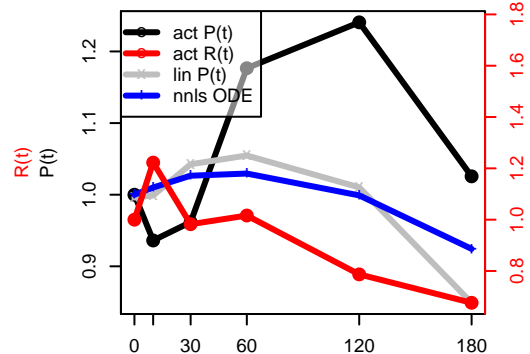

Time (min)  
ks = 0.00668341053577882 kd = 0.00640284023638186

SPAC19D5.04

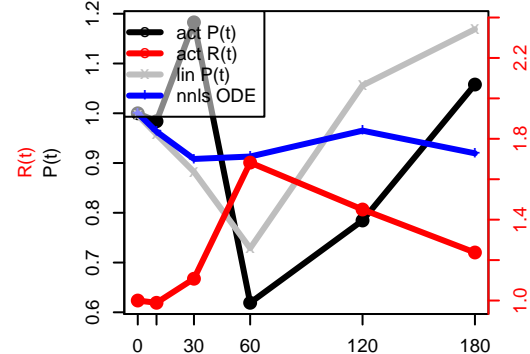

Time (min)  
ks = 0.00737762789389082 kd = 0.0112388460855575

SPAC19G12.11

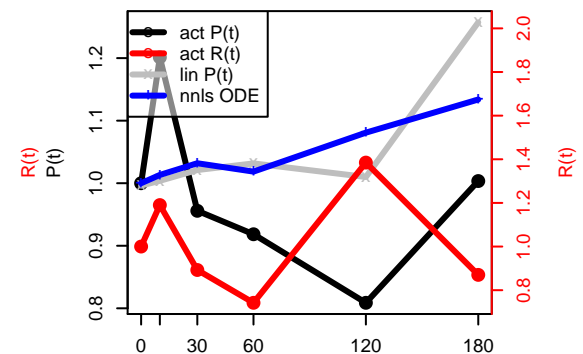

Time (min)  
ks = 0.00607049349837184 kd = 0.00529939526893194

SPAC20G4.06c

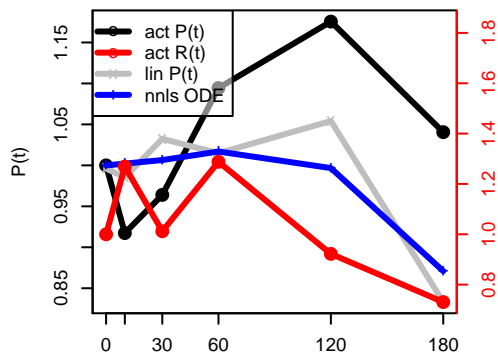

Time (min)  
ks = 0.00951256105643522 kd = 0.010595260530909

SPAC22A12.09c

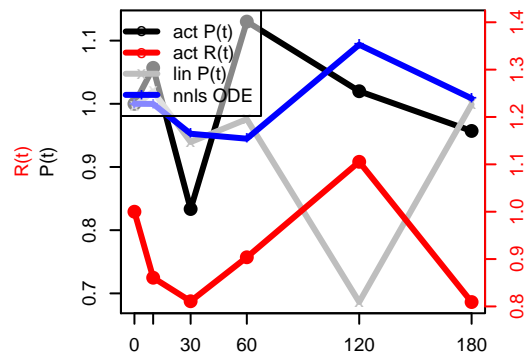

Time (min)  
ks = 0.0330265923148644 kd = 0.0306828599883018

SPAC2F7.15

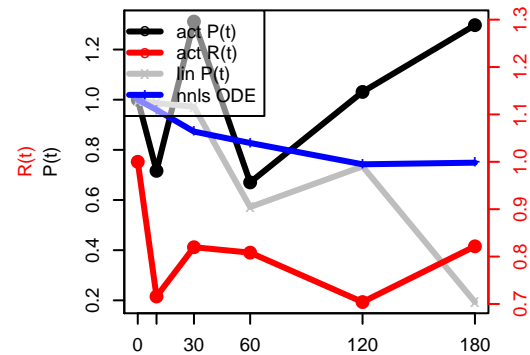

Time (min)  
ks = 0.0244248820998321 kd = 0.0254228341471635

SPAC343.10

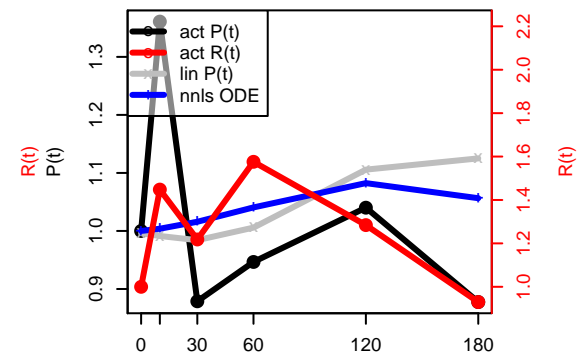

Time (min)  
ks = 0.0033700170277646 kd = 0.00385081766977747

SPAC3H1.12c

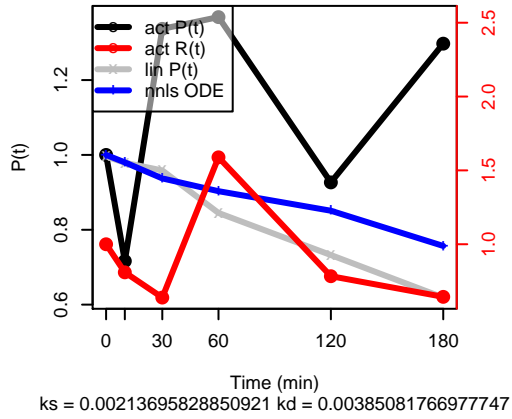

SPAC4F8.12c

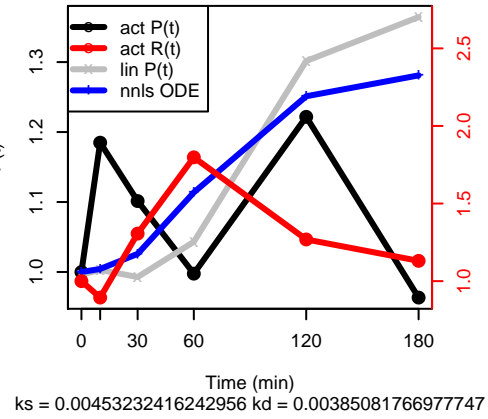

SPAC644.12

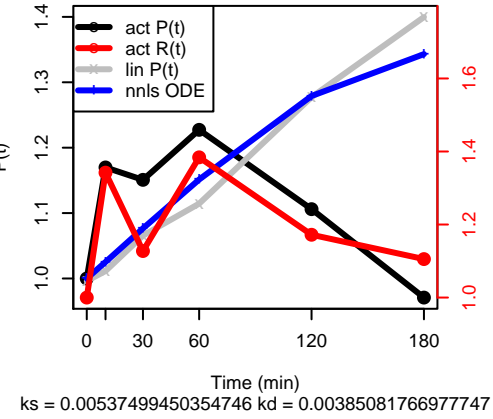

SPAC8E11.10

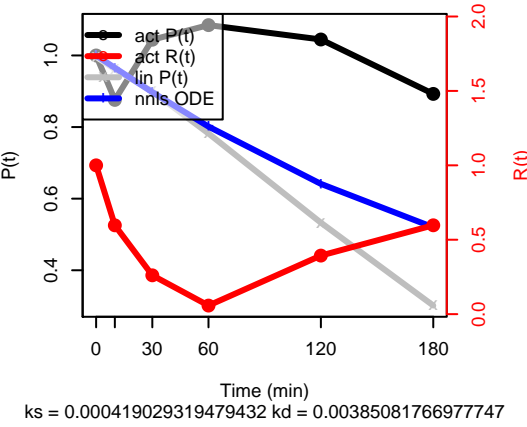

SPAC926.09c

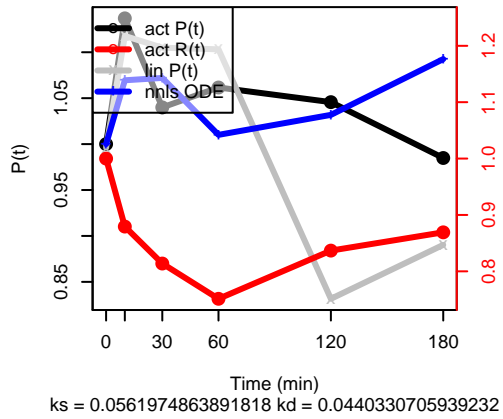

SPAPB17E12.13

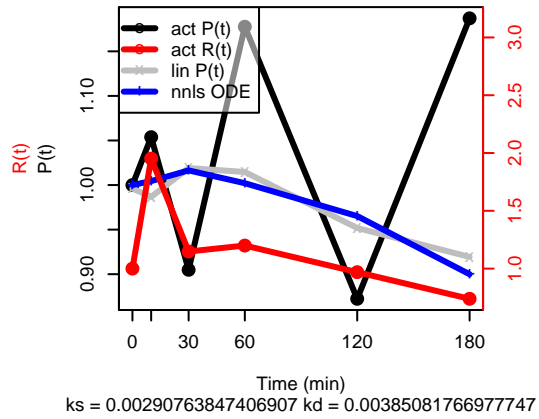

SPAPB21F2.02

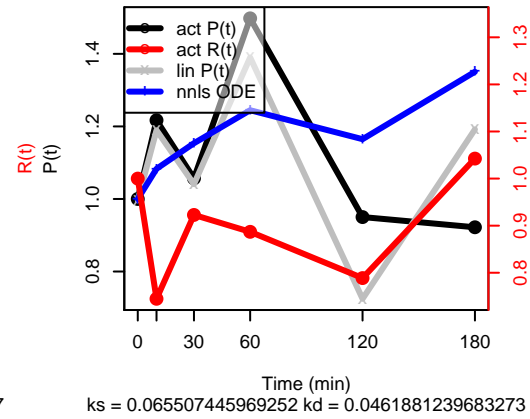

SPBC1271.07c

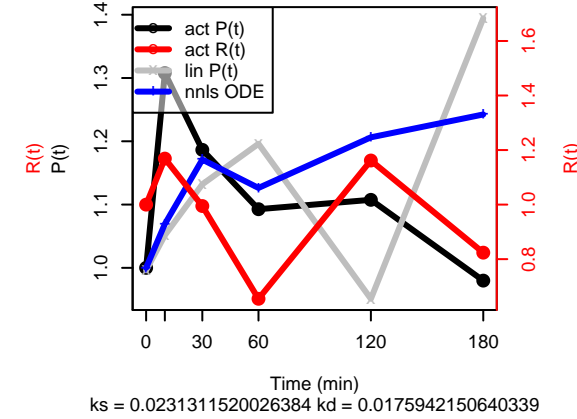

SPBC1347.09

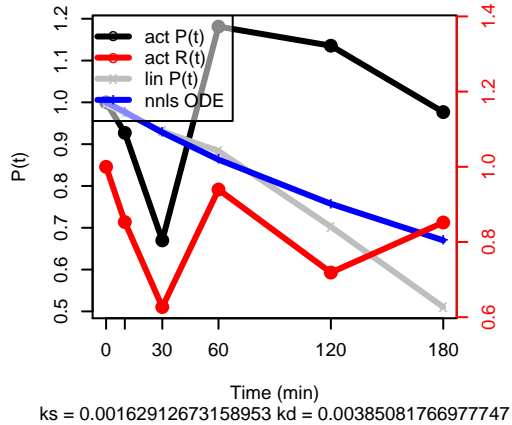

SPBC1539.10

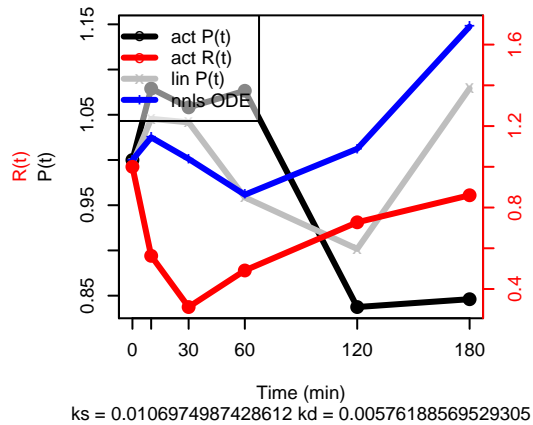

SPBC16G5.15c

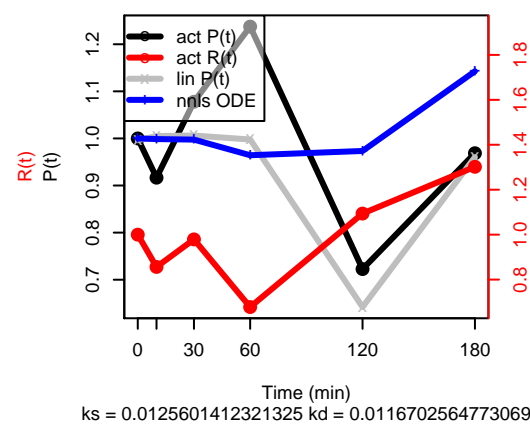

SPBC1711.10c

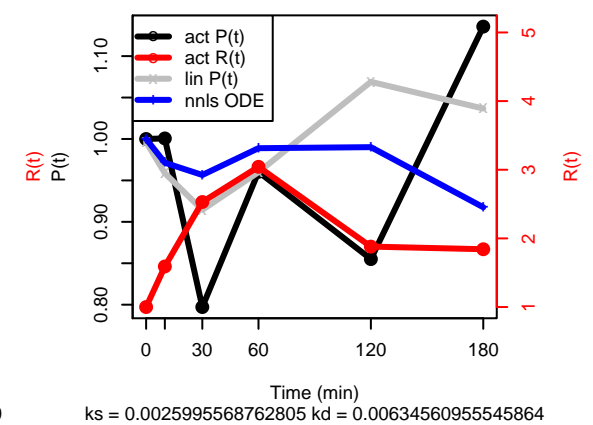

SPBC1778.03c

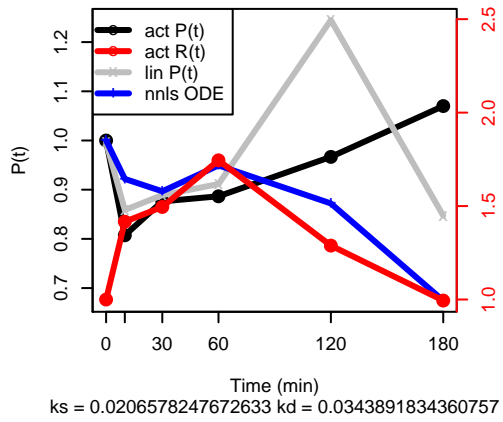

SPBC23E6.05

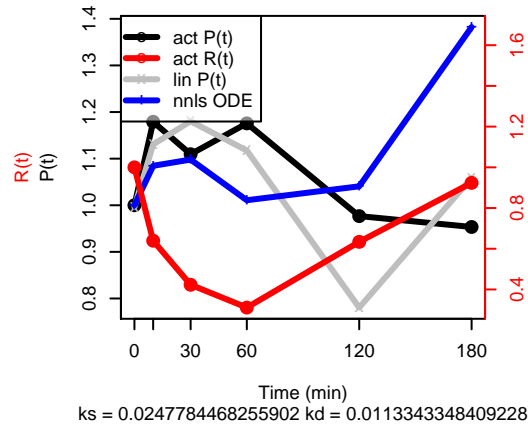

SPBC26H8.11c

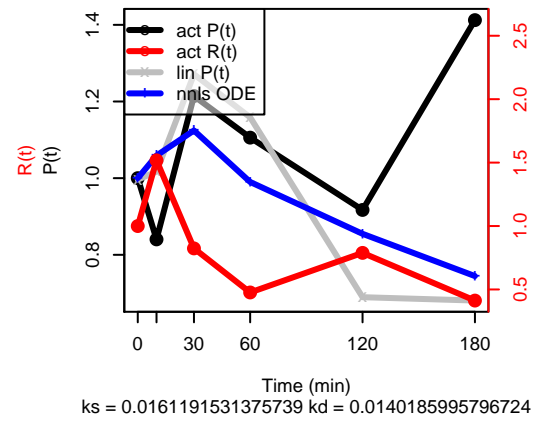

SPBC29A3.04

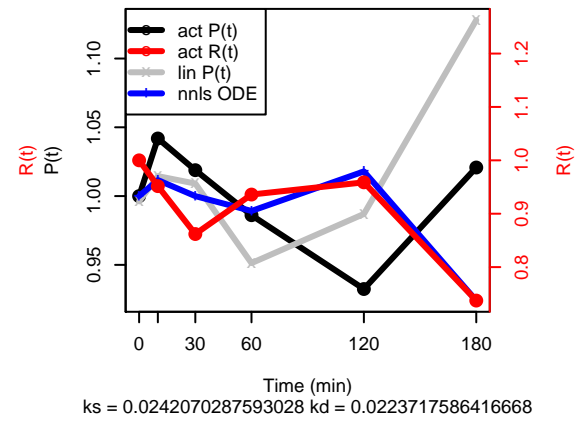

SPBC337.03

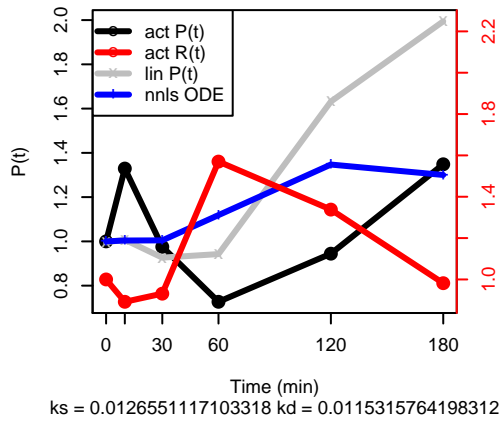

SPBC3B9.11c

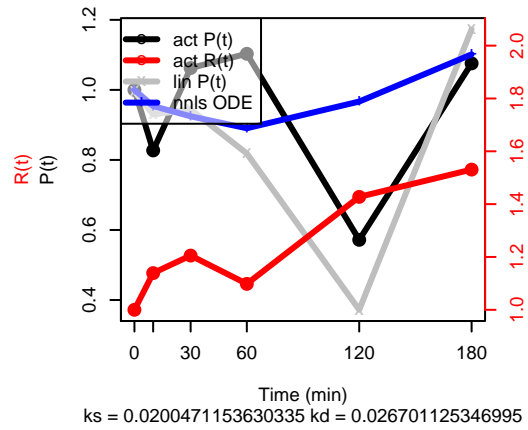

SPBC4B4.03

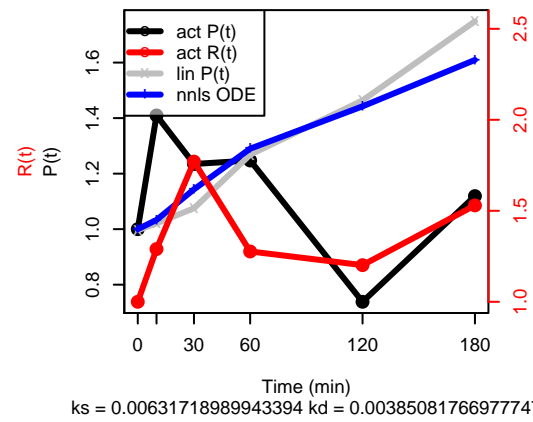

SPBC582.08

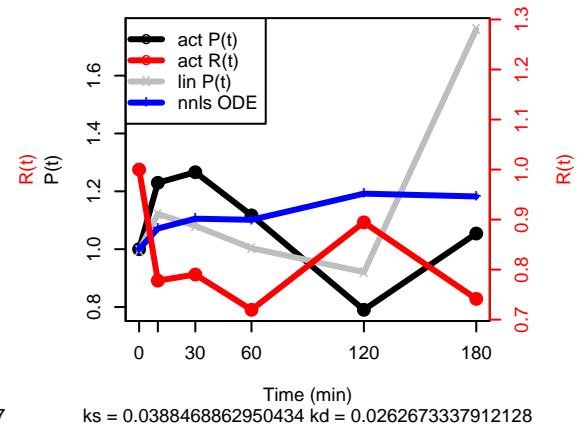

SPBC800.06

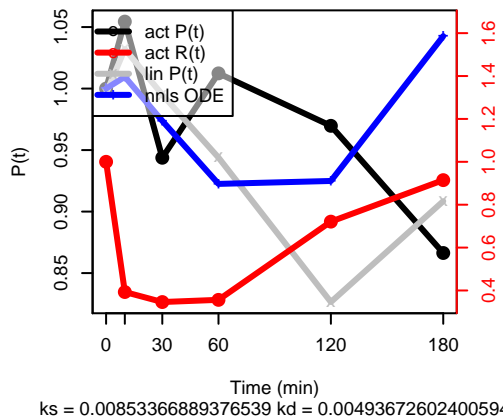

SPBC83.08

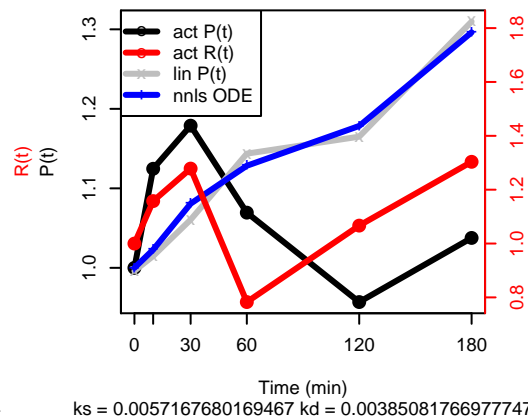

SPBP23A10.07

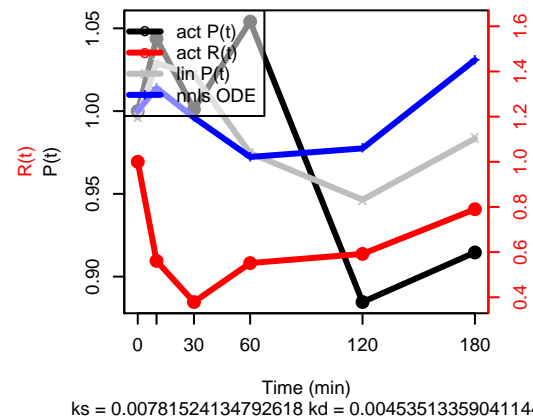

SPBP8B7.11

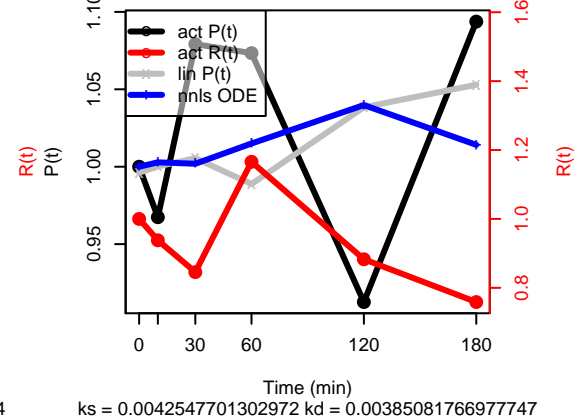

SPBP8B7.31

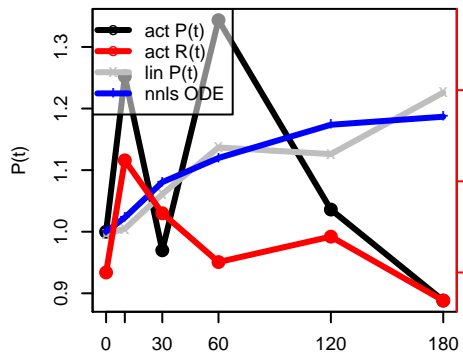

Time (min)  
ks = 0.00472465533697886 kd = 0.00385081766977747

SPCC1620.09c

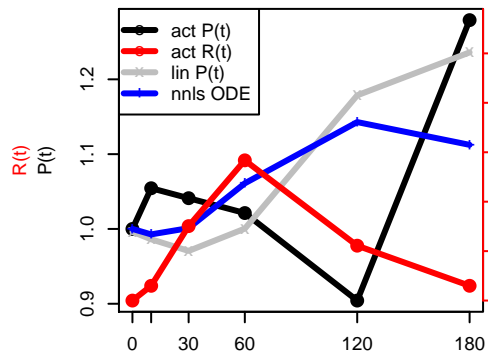

Time (min)  
ks = 0.00285443713870784 kd = 0.00385081766977747

SPCC1672.05c

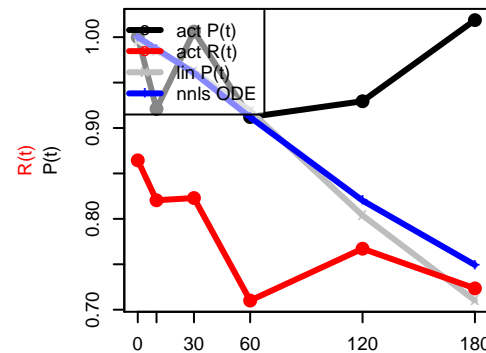

Time (min)  
ks = 0.00273911283011905 kd = 0.00385081766977747

SPCC1827.05c

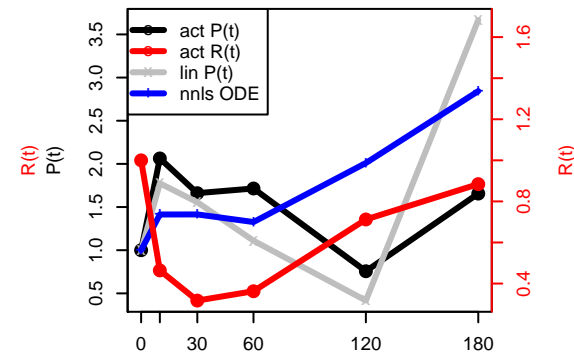

Time (min)  
ks = 0.107310738139154 kd = 0.0294366689443292

SPCC645.05c

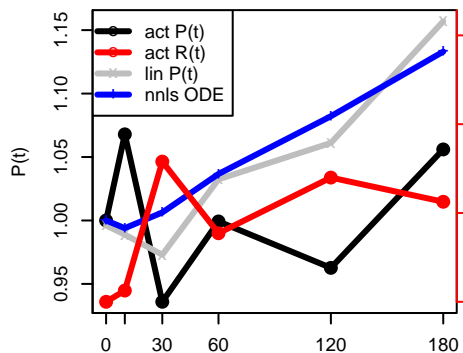

Time (min)  
ks = 0.0031211255411891 kd = 0.00385081766977747

SPCC663.13c

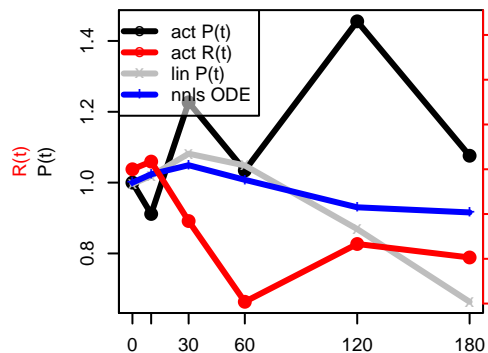

Time (min)  
ks = 0.00855310395946378 kd = 0.0062666428089661

SPCC794.08

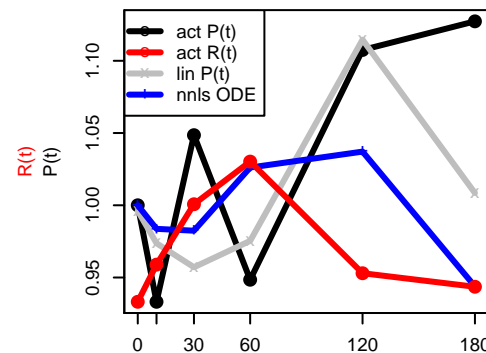

Time (min)  
ks = 0.00160602050898957 kd = 0.00385081766977747

SPCPJ732.01

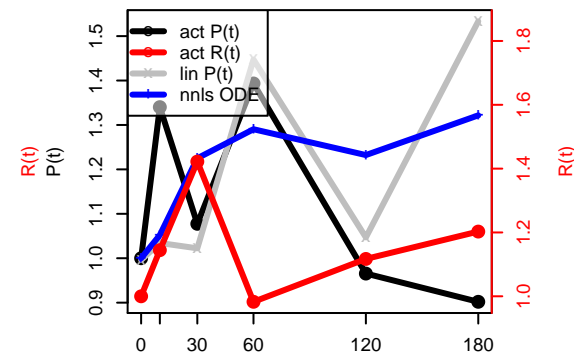

Time (min)  
ks = 0.0291840066219304 kd = 0.0253703380019665

SPAC13G6.10c

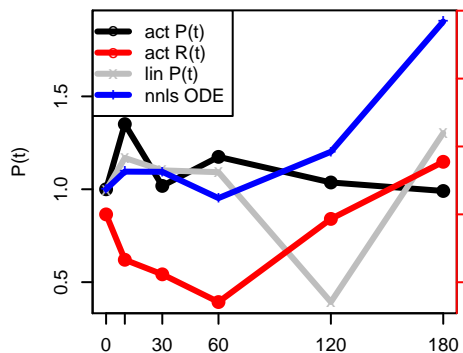

Time (min)  
ks = 0.0389121295494354 kd = 0.0216569735948577

SPAC1F3.05

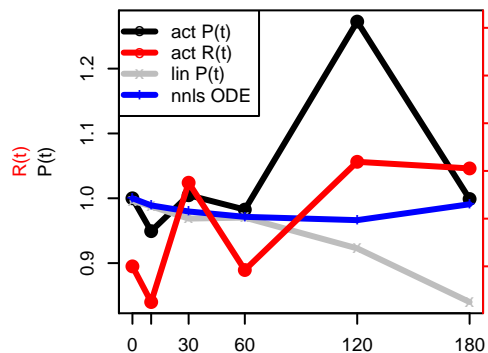

Time (min)  
ks = 0.00536619796149748 kd = 0.00622515379551645

SPAC22G7.09c

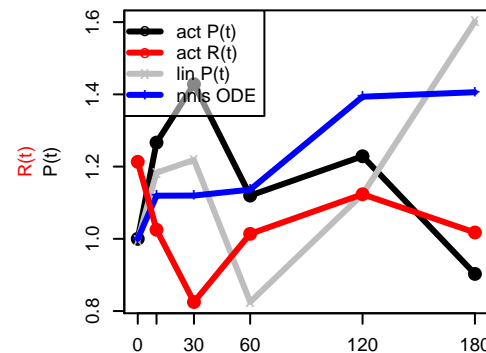

Time (min)  
ks = 0.0447780573956373 kd = 0.0260652416410067

SPAC23C11.11

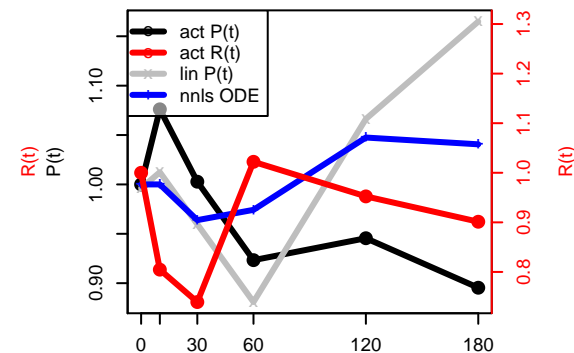

Time (min)  
ks = 0.0161323351647162 kd = 0.0145120177175269

SPAC26H5.07c

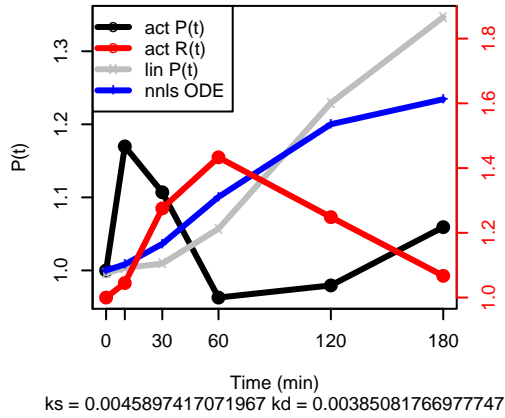

SPAC29A4.08c

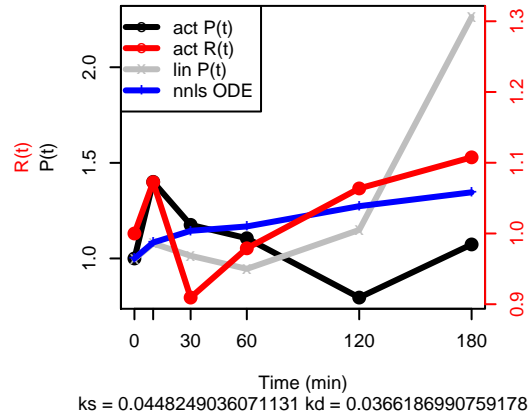

SPAC31G5.10

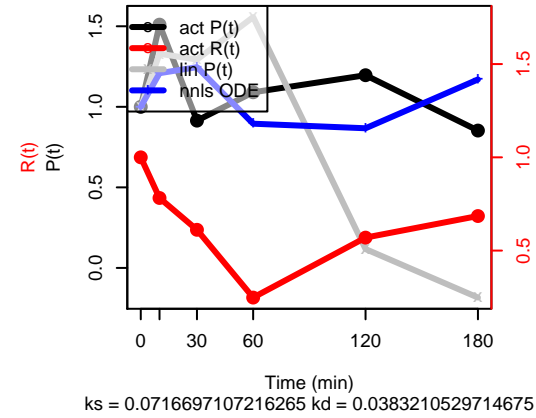

SPAC3F10.16c

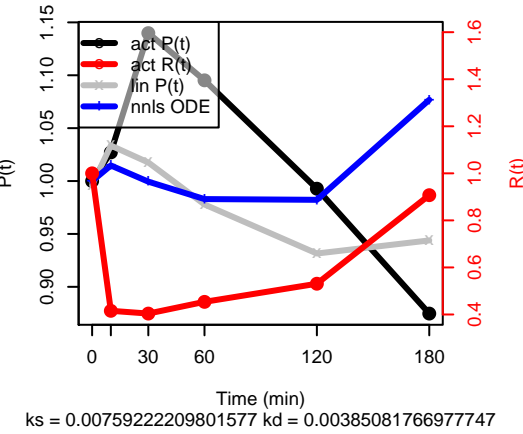

SPAC4F8.05c

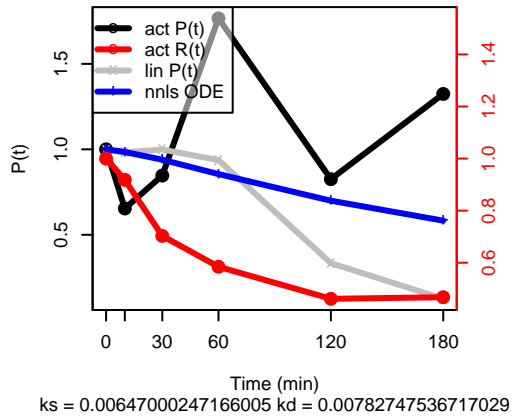

SPAC56E4.06c

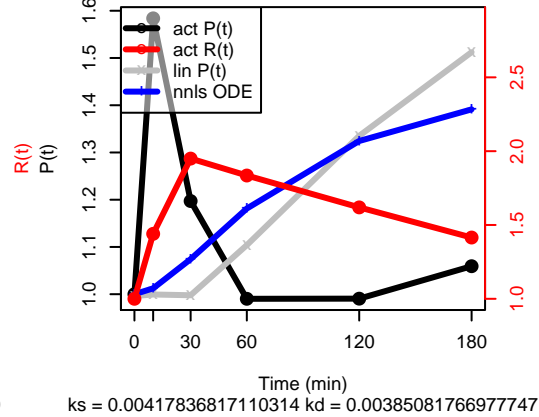

SPAC57A7.10c

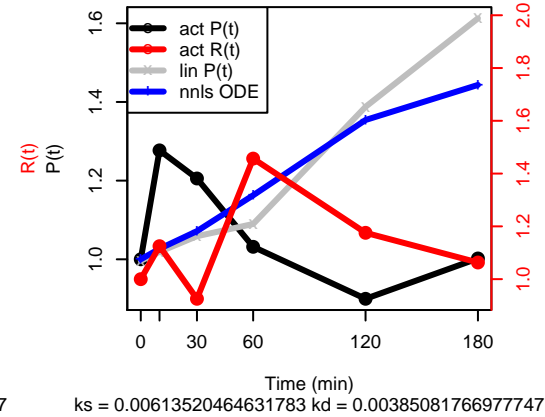

SPAC6B12.12

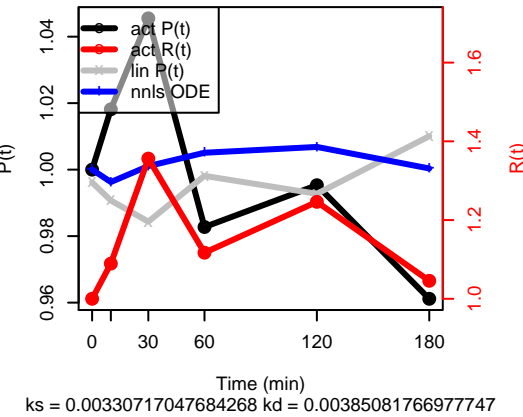

SPAC7D4.12c

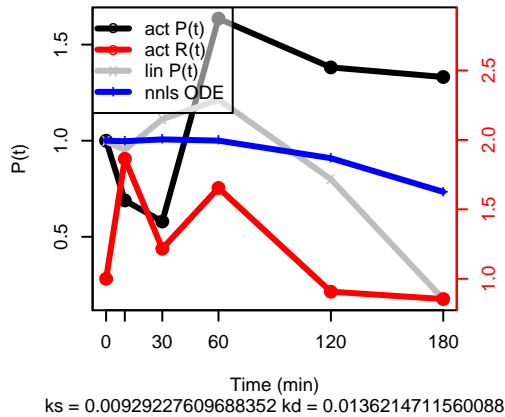

SPAPB1E7.02c

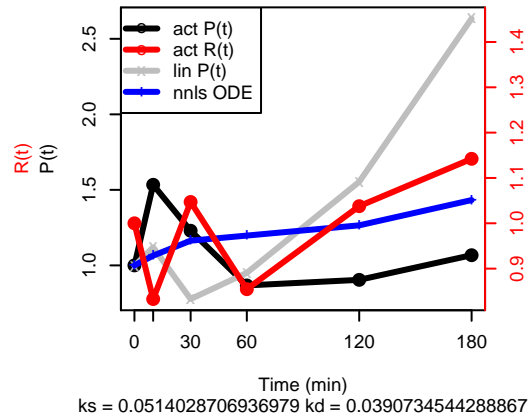

SPBC11G11.05

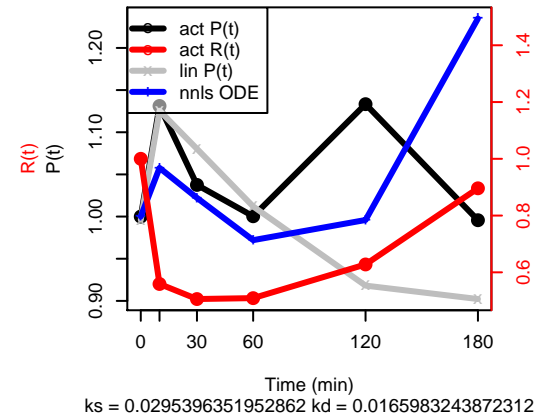

SPBC13E7.09

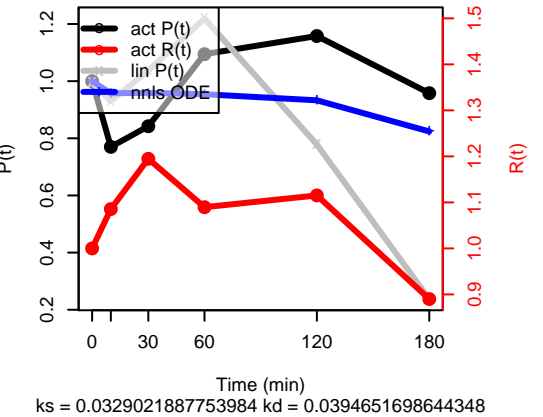



SPBC14F5.11c

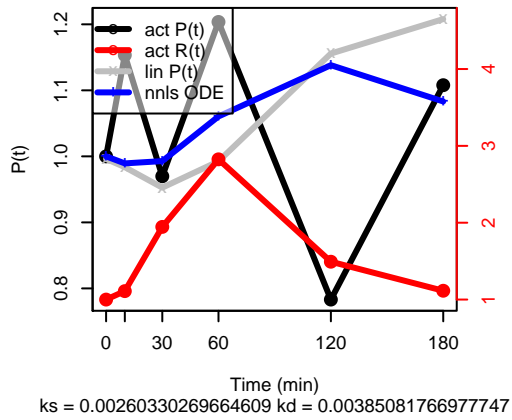

SPBC15C4.04c

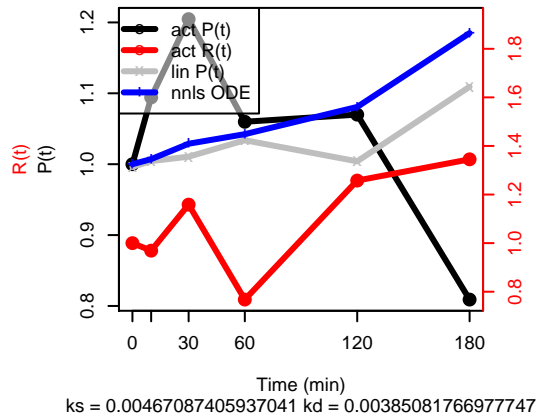

SPBC1604.12

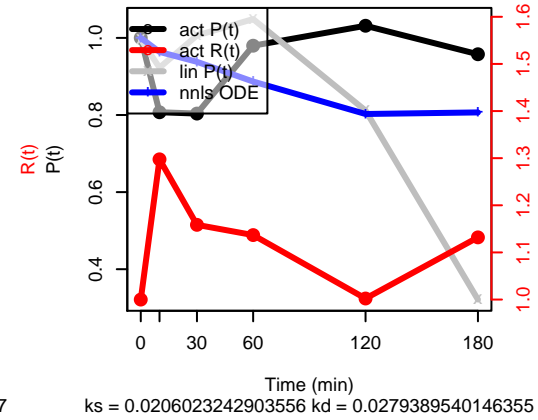

SPBC16E9.13

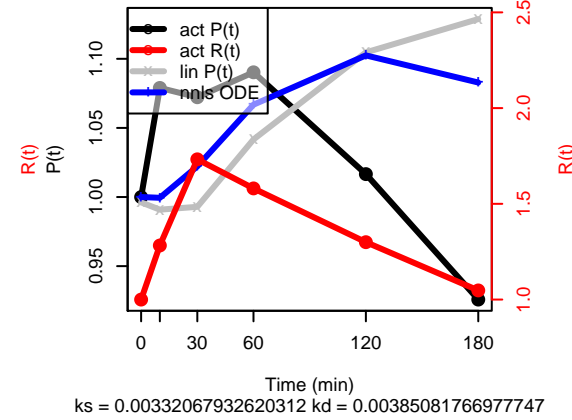

SPBC1709.08

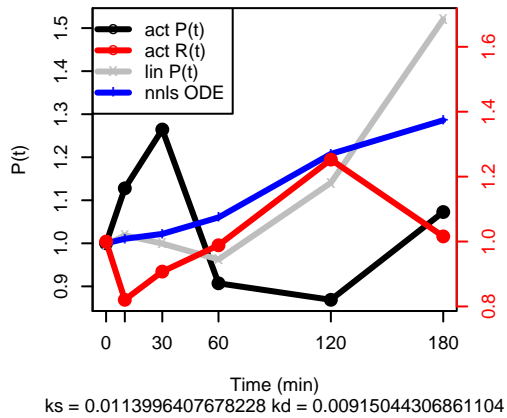

SPBC18E5.07

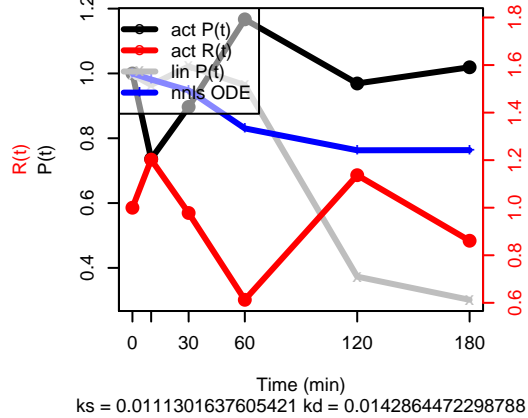

SPBC365.01

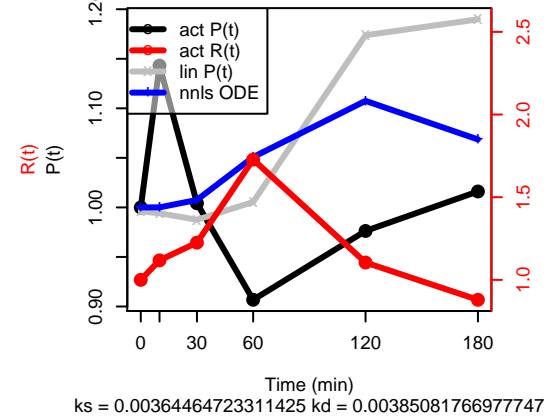

SPBC3D6.13c

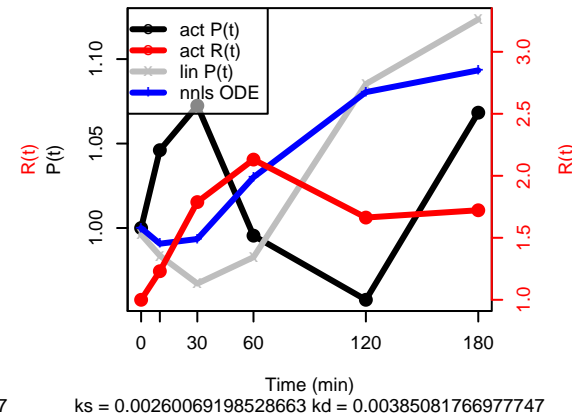

SPBC4.03c

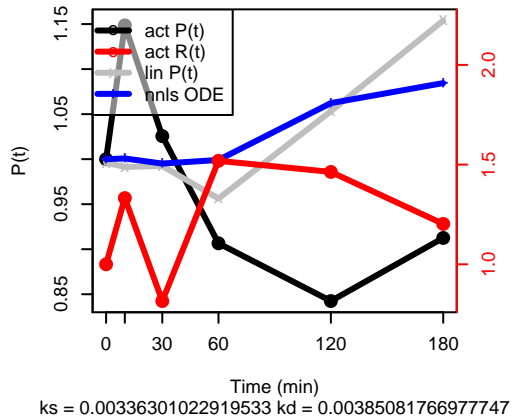

SPBC56F2.07c

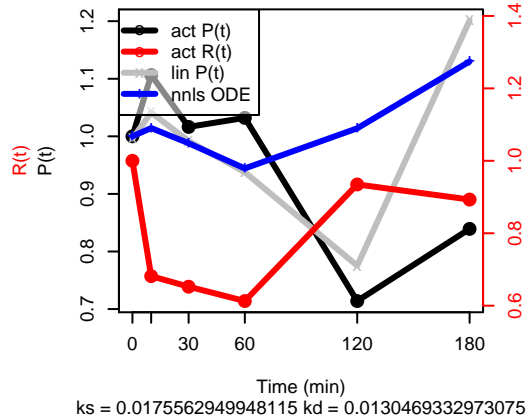

SPBP8B7.25

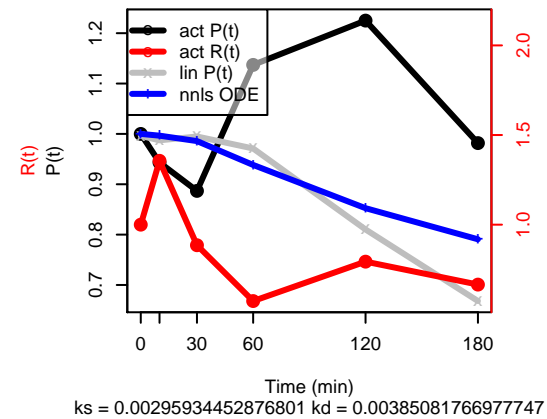

SPCC550.03c

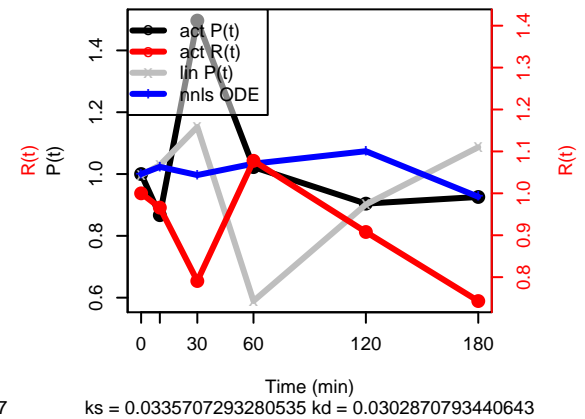

SPAC11E3.07

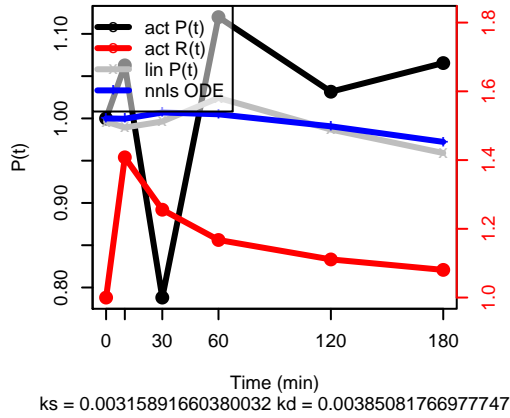

SPAC11E3.15

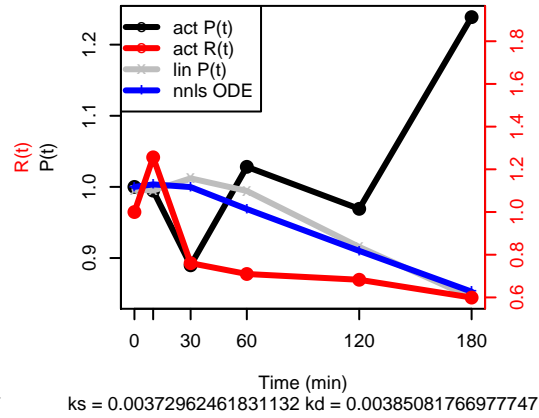

SPAC12B10.02c

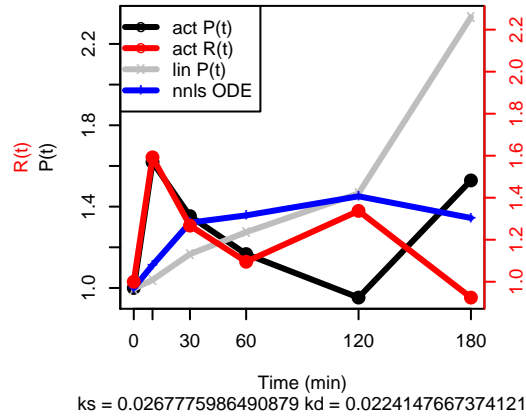

SPAC13A11.05

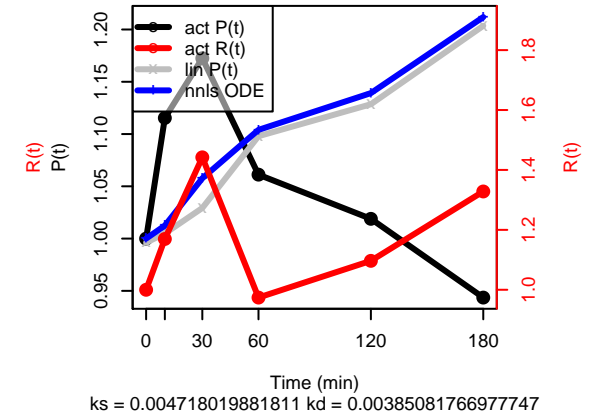

SPAC13C5.05c

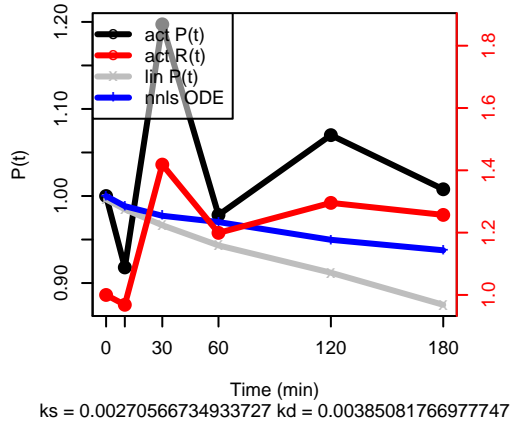

SPAC1B2.03c

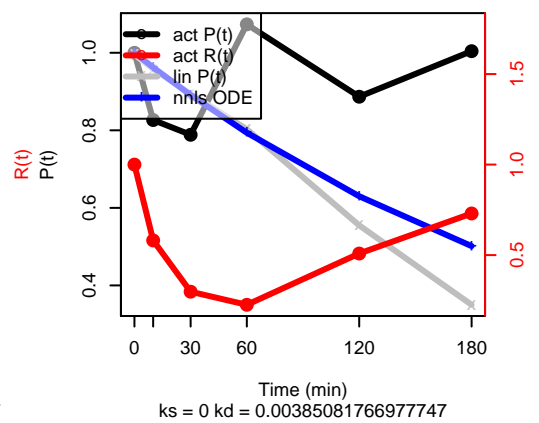

SPAC20G8.03

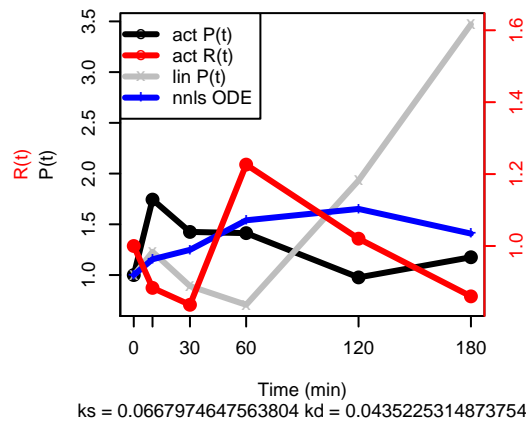

SPAC21E11.04

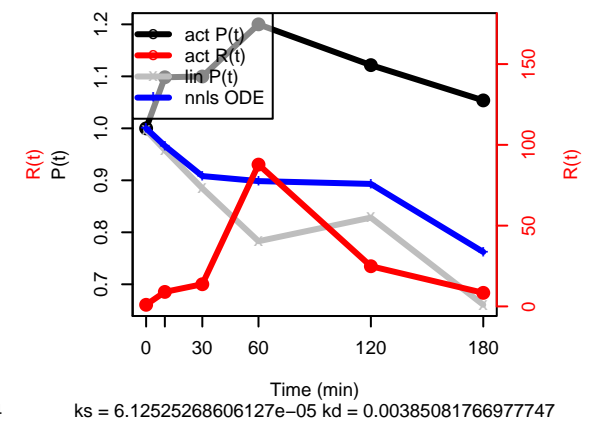

SPAC22E12.07

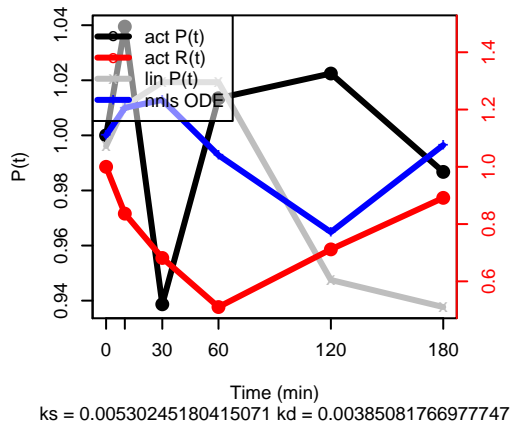

SPAC27E2.09

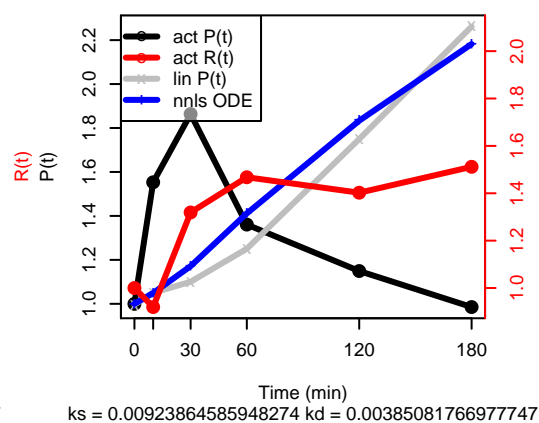

SPAC3A12.13c

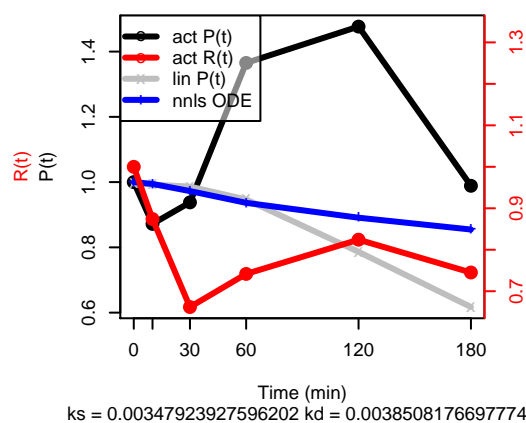

SPAC3C7.11c

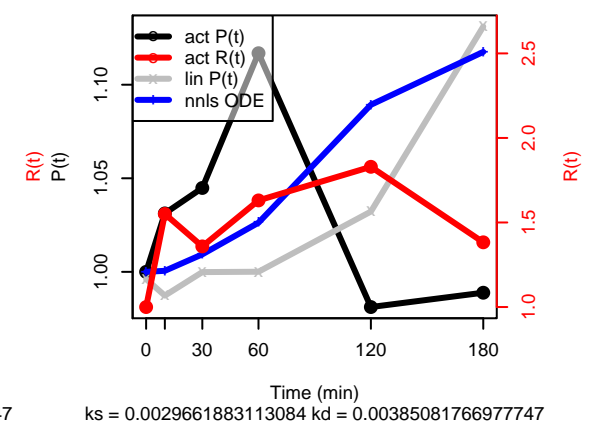

SPAC458.02c

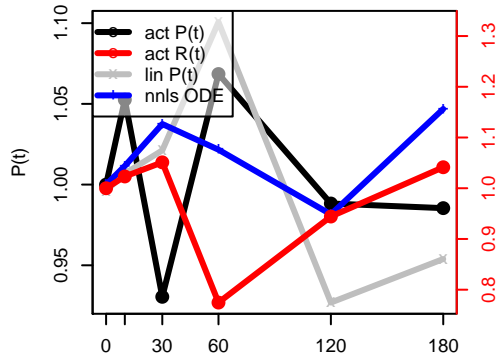

Time (min)  
ks = 0.0137325726348297 kd = 0.0126656919036804

SPAC4F10.11

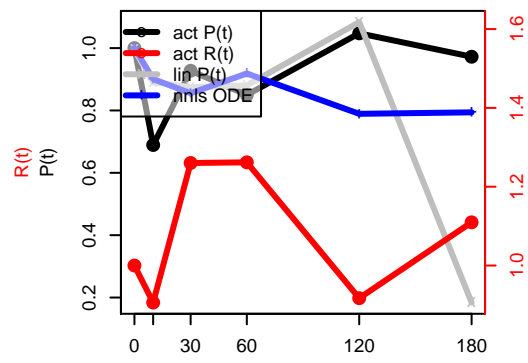

Time (min)  
ks = 0.0300339156083281 kd = 0.0406133791088403

SPAC589.04

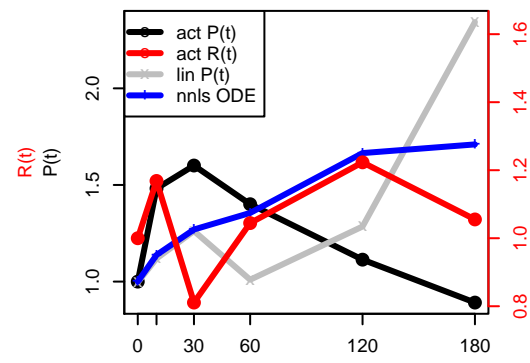

Time (min)  
ks = 0.0356128151531783 kd = 0.0232852822904384

SPAC824.08

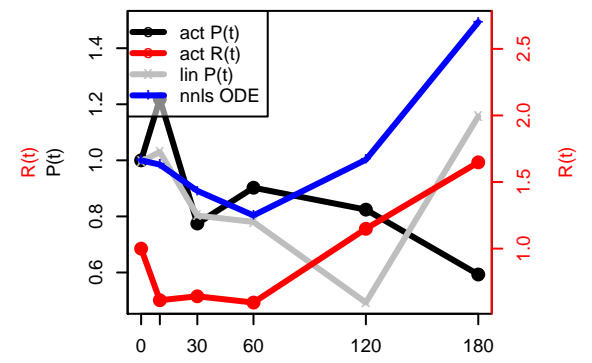

Time (min)  
ks = 0.0254996087147061 kd = 0.0221232245175701

SPBC106.17c

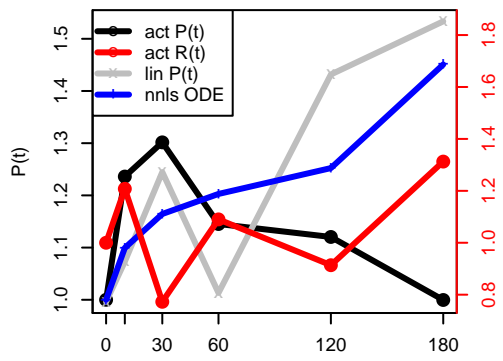

Time (min)  
ks = 0.0335438776681372 kd = 0.0258402297233109

SPBC12C2.05c

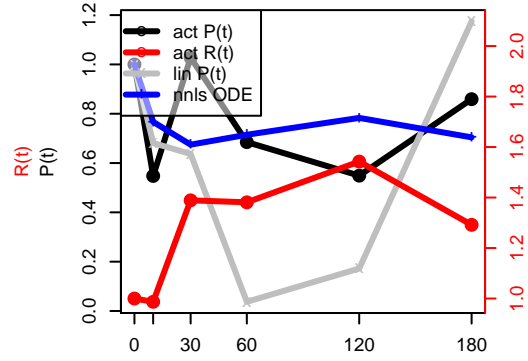

Time (min)  
ks = 0.0342068347280422 kd = 0.0656873051468227

SPBC13E7.07

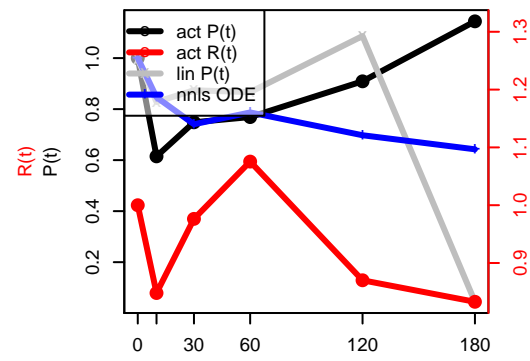

Time (min)  
ks = 0.0540591195179668 kd = 0.0708481384359026

SPBC13G1.03c

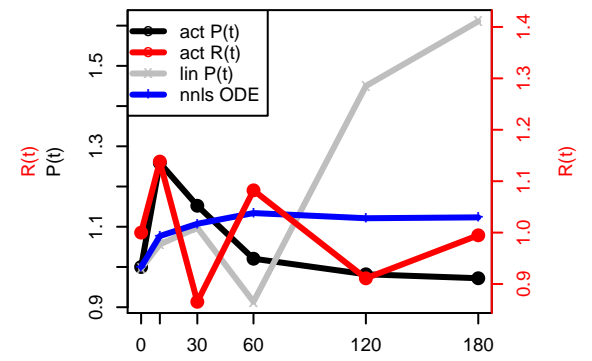

Time (min)  
ks = 0.0455488544522372 kd = 0.0395383592945124

SPBC14F5.07

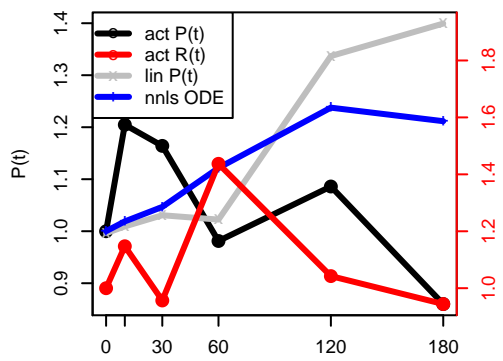

Time (min)  
ks = 0.00868582241925287 kd = 0.00737927375960441

SPBC1539.01c

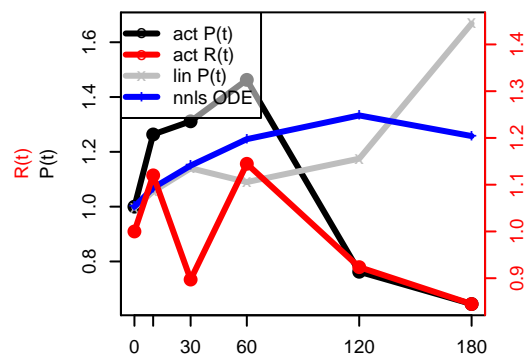

Time (min)  
ks = 0.0228693211901478 kd = 0.0169253499137439

SPBC1604.08c

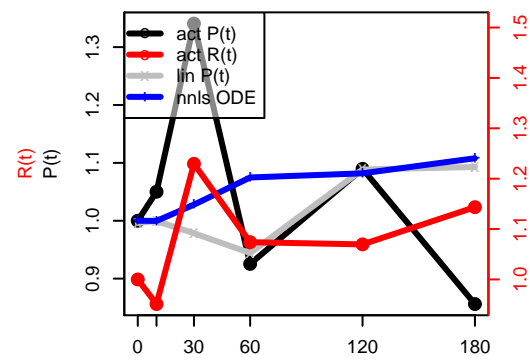

Time (min)  
ks = 0.0141563837408373 kd = 0.0138288732563459

SPBC1685.13

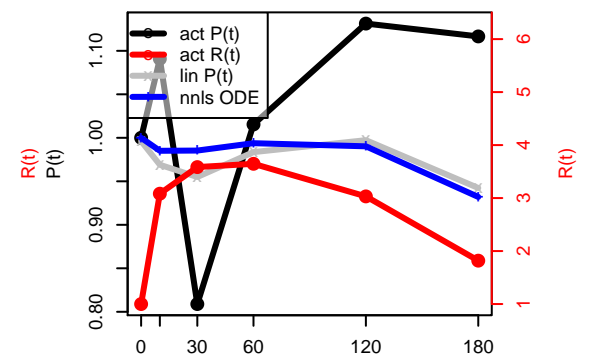

Time (min)  
ks = 0.00113491626325813 kd = 0.00385081766977747

SPBC16C6.02c

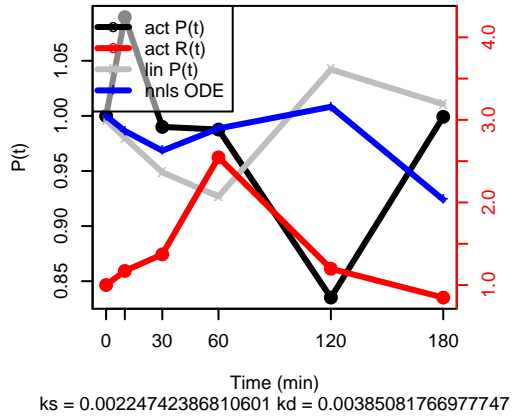

SPBC1703.14c

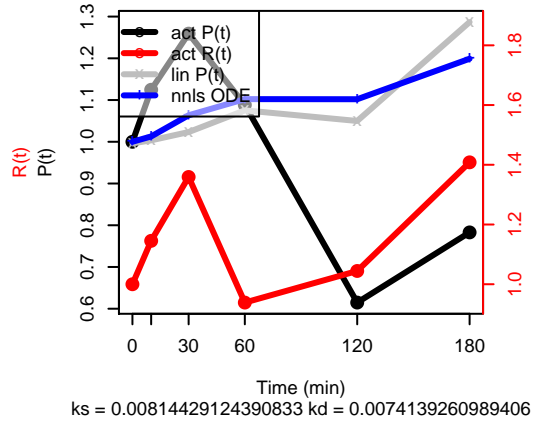

SPBC1921.03c

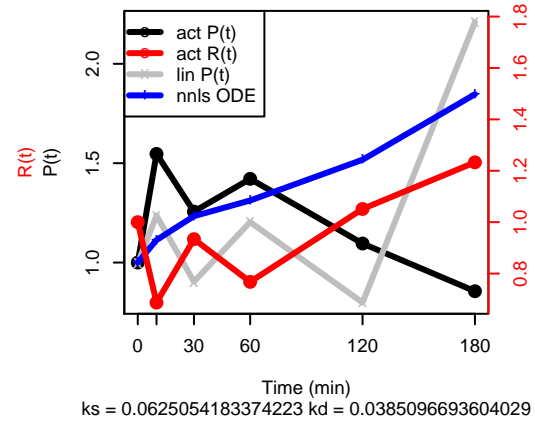

SPBC25B2.05

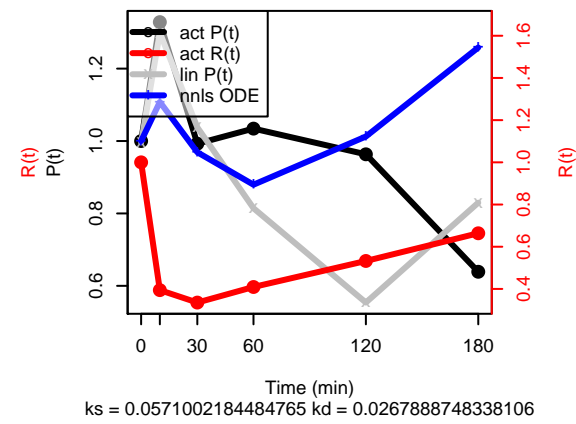

SPBC25H2.09

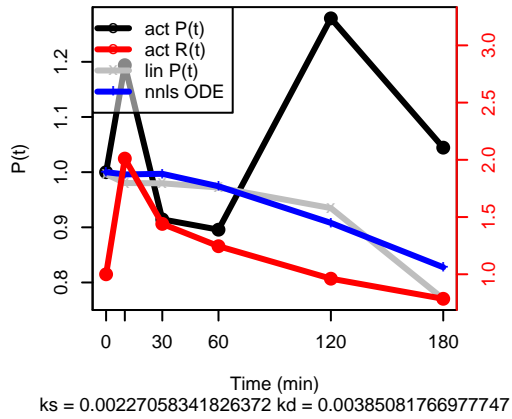

SPBC28E12.03

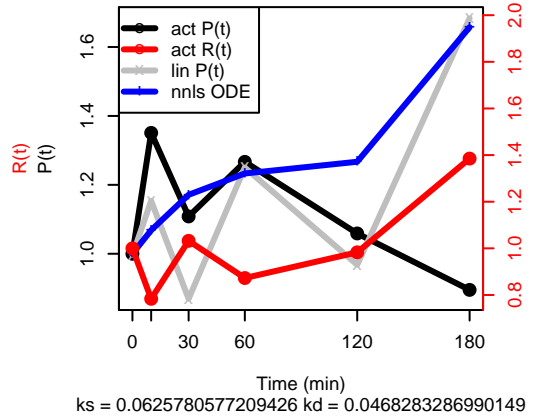

SPBC30D10.17c

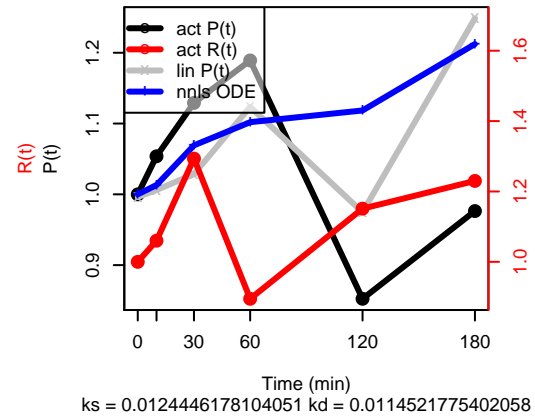

SPBC337.05c

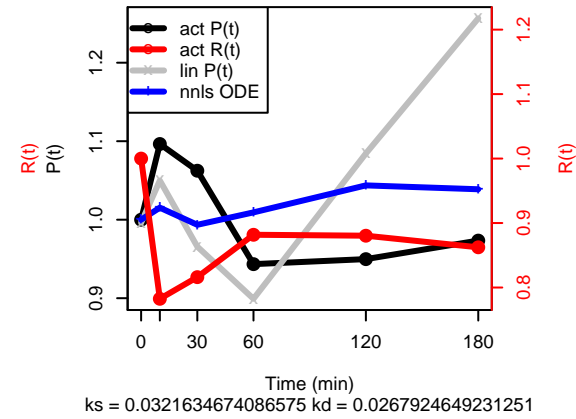

SPBC354.12

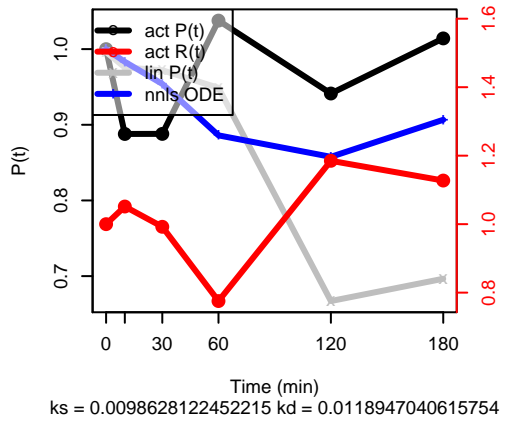

SPBC776.04

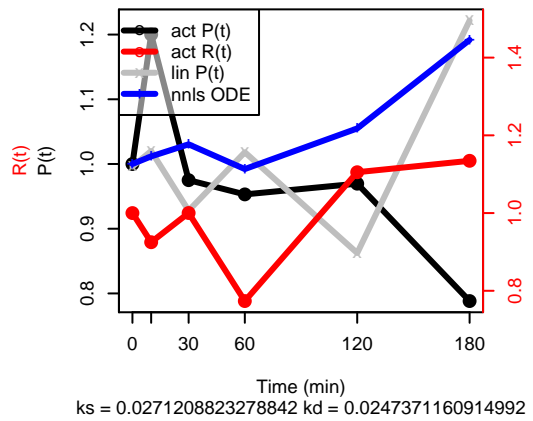

SPBC776.07

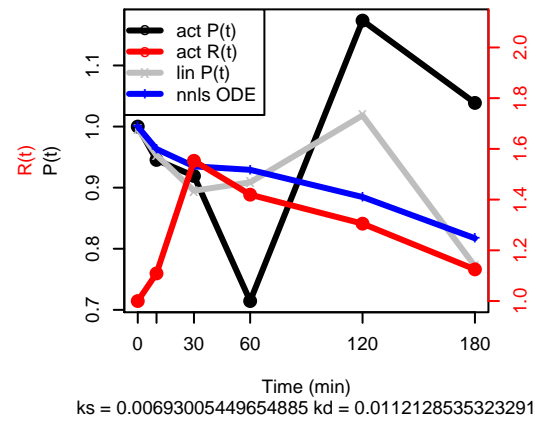

SPBC947.15c

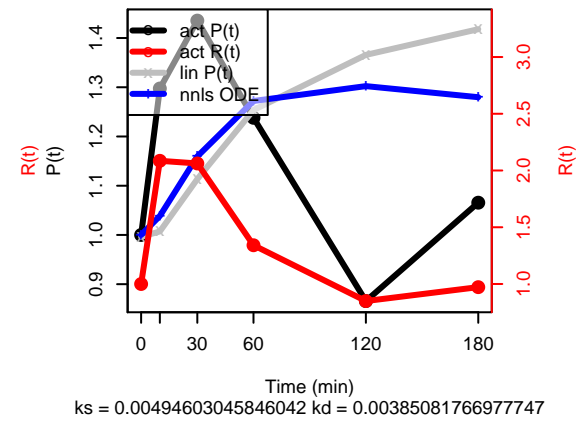

SPAC17A5.14

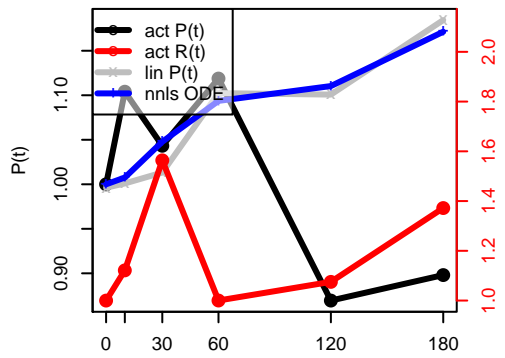

Time (min)  
ks = 0.0047495554964579 kd = 0.0042701234283699

SPAC20G8.07c

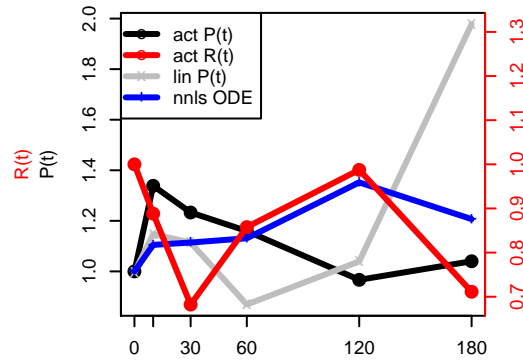

Time (min)  
ks = 0.0487113349523127 kd = 0.03357842286764

SPAC227.18

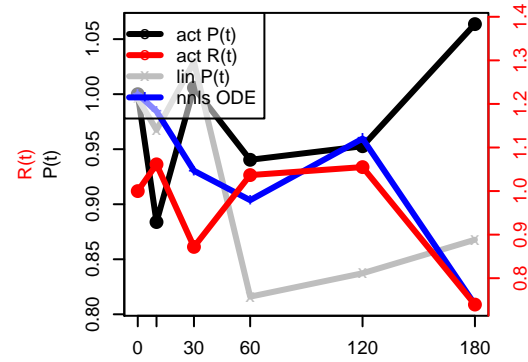

Time (min)  
ks = 0.0315784541579801 kd = 0.0344368101426789

SPAC26A3.10

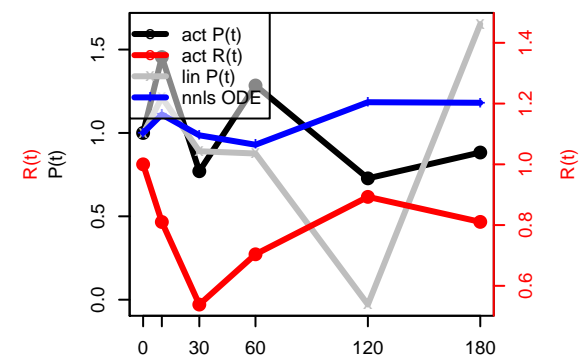

Time (min)  
ks = 0.0740154045525452 kd = 0.0523016034964259

SPAC26H5.05

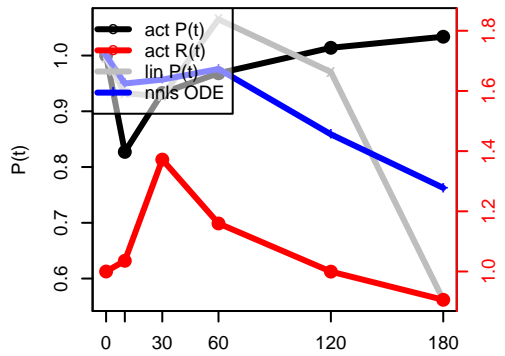

Time (min)  
ks = 0.0240217414751555 kd = 0.0303992494143923

SPAC2C4.07c

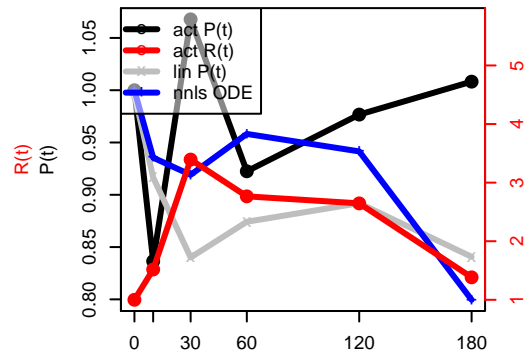

Time (min)  
ks = 0.00413885210313702 kd = 0.0120881662001238

SPAC2F3.09

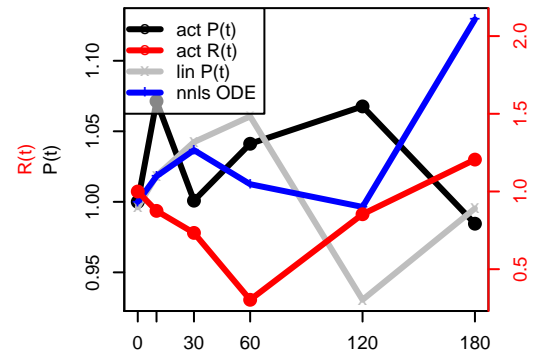

Time (min)  
ks = 0.00608027238622604 kd = 0.00385081766977747

SPAC30C2.06c

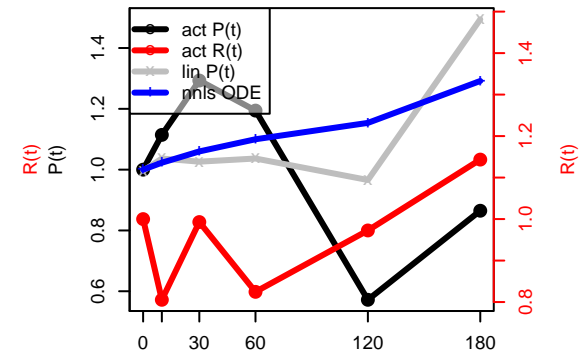

Time (min)  
ks = 0.0162215985640008 kd = 0.0121865984373013

SPBC1271.12

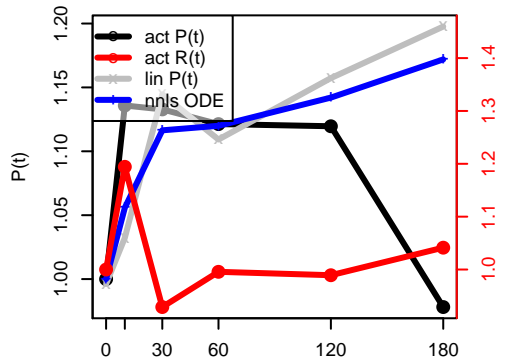

Time (min)  
ks = 0.0258598703271778 kd = 0.0222484388292008

SPBC1604.11

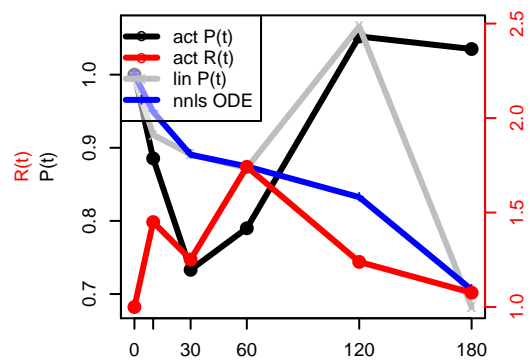

Time (min)  
ks = 0.00988017709375923 kd = 0.0177067099775487

SPBC1773.04

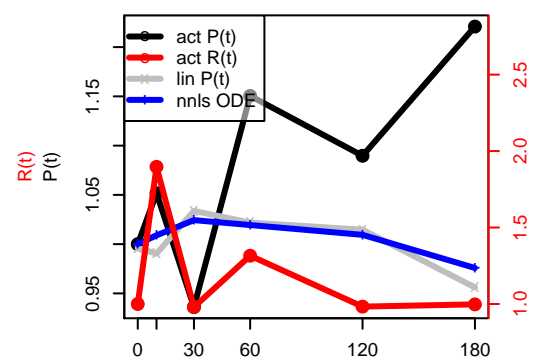

Time (min)  
ks = 0.00327590694901446 kd = 0.00385081766977747

SPBC19G7.16

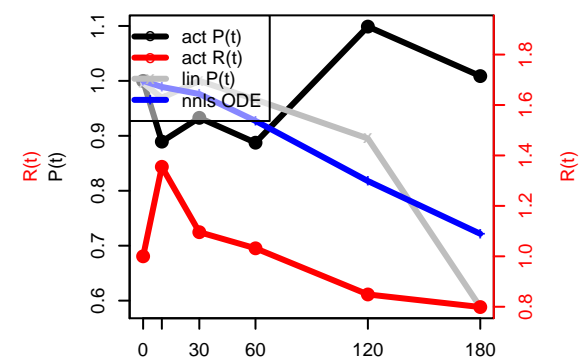

Time (min)  
ks = 0.00852472412524443 kd = 0.0112384397403395

SPBC216.07c

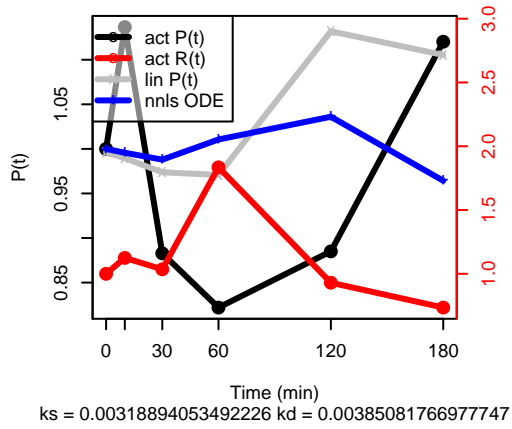

SPBC354.07c

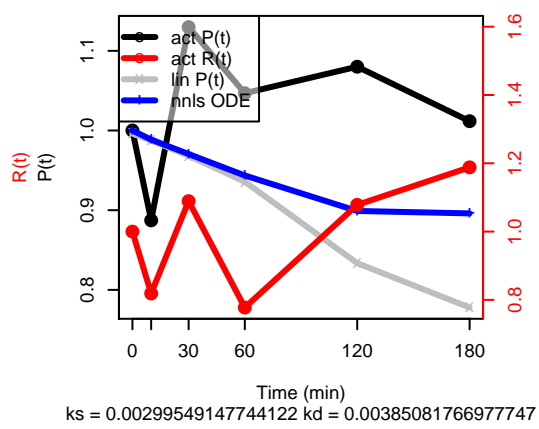

SPBC36.07

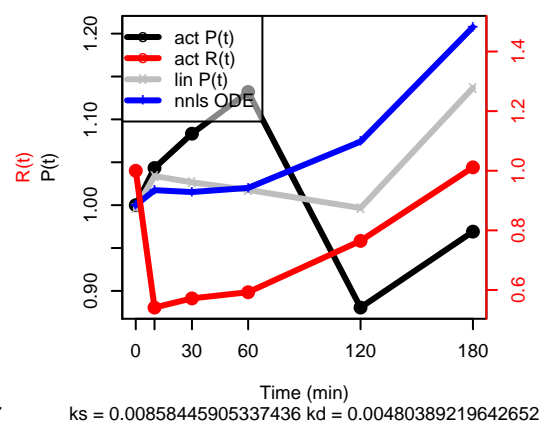

SPBC4C3.06

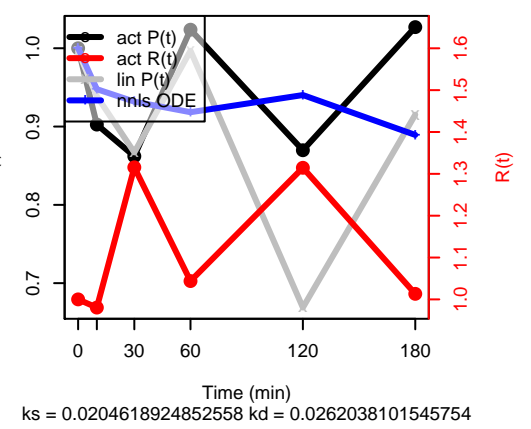

SPBC776.15c

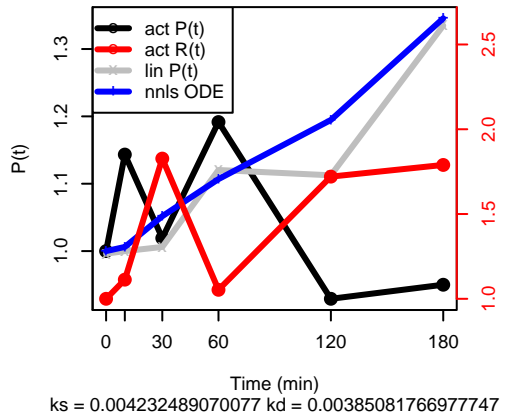

SPBP4H10.05c

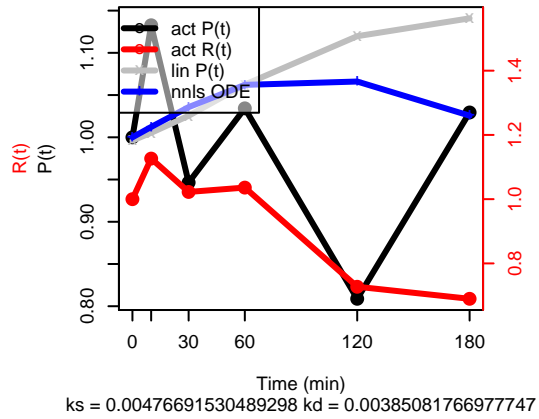

SPCC126.06

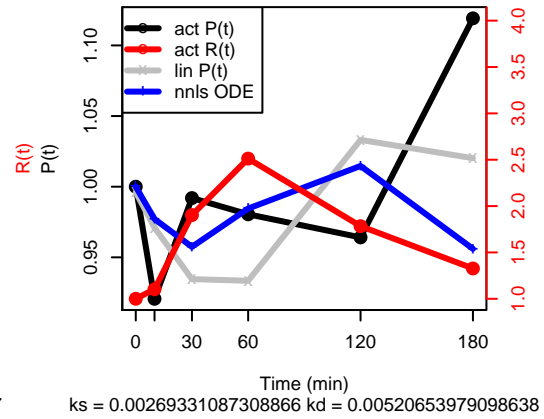

SPCC18.15

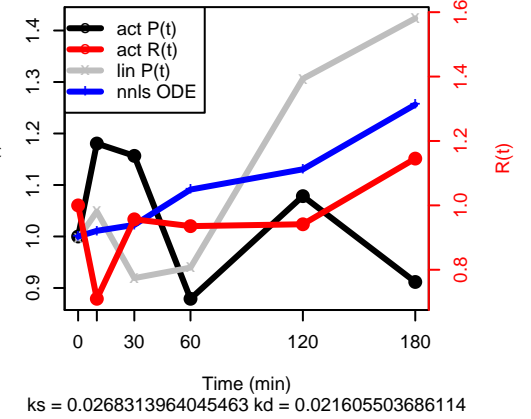

SPCC188.02

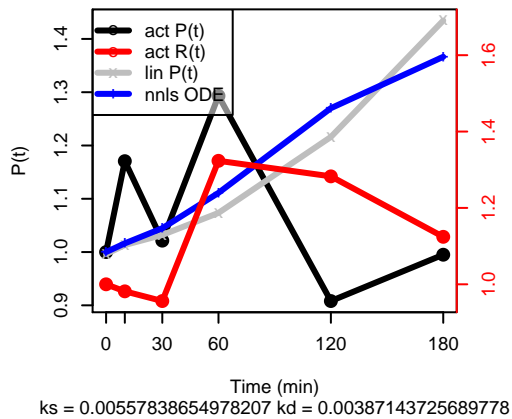

SPCC4B3.18

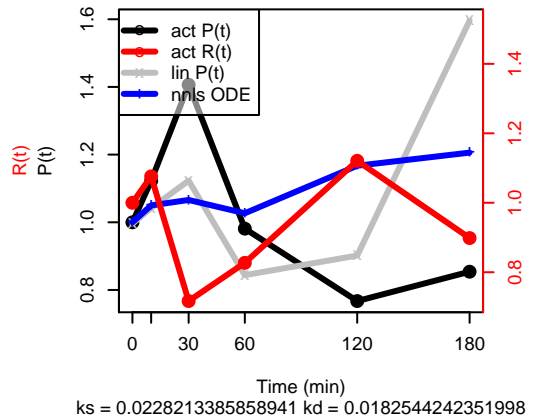

SPCC70.03c

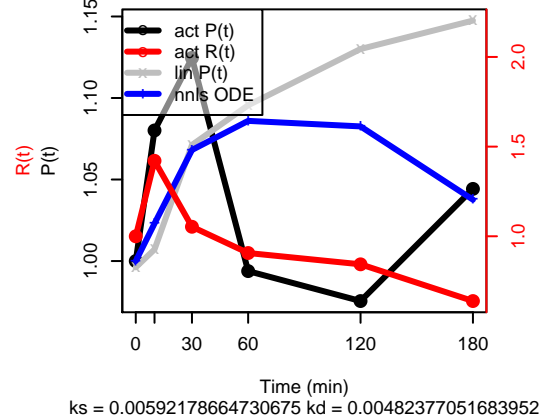

SPAC16E8.17c

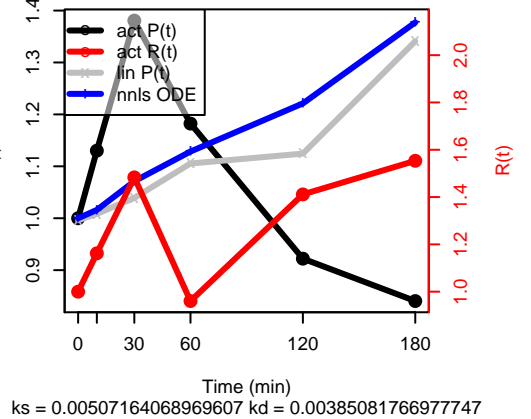

SPAC1834.11c

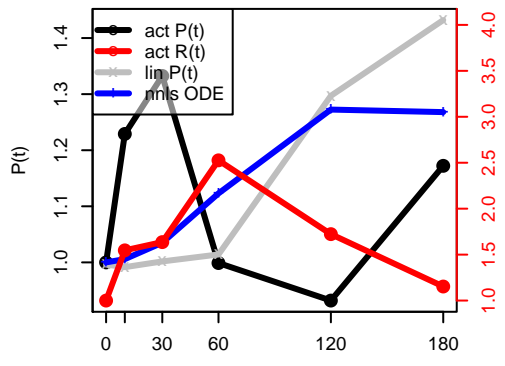

Time (min)  
ks = 0.0033889608182309 kd = 0.00385081766977747

SPAC24H6.13

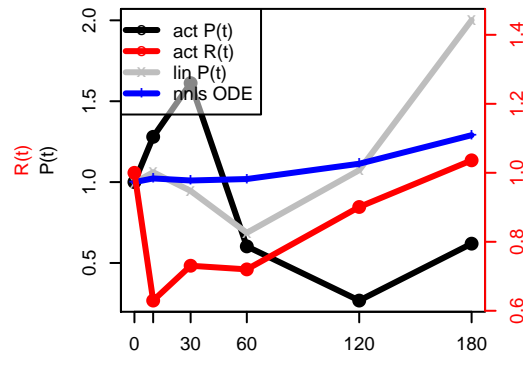

Time (min)  
ks = 0.0216677687711367 kd = 0.015176275671962

SPAC31G5.17c

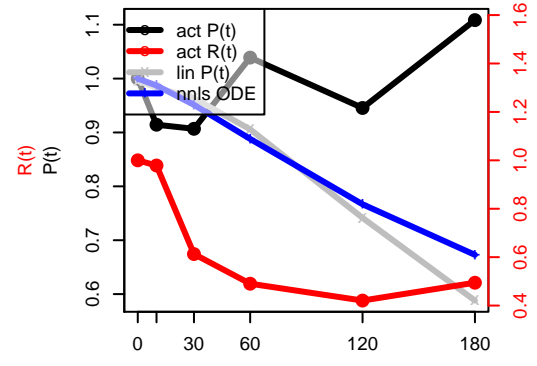

Time (min)  
ks = 0.00257324947073214 kd = 0.00385081766977747

SPBC1289.04c

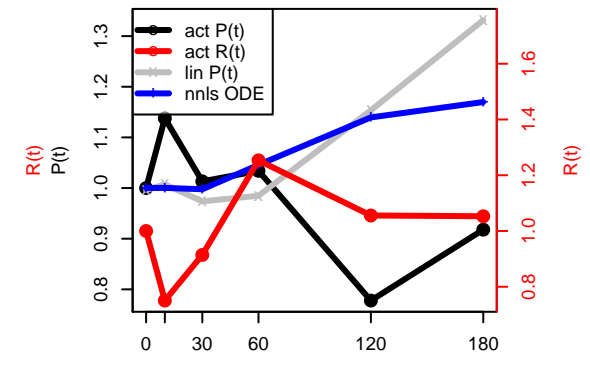

Time (min)  
ks = 0.00758487441575478 kd = 0.00647686161599296

SPBC15C4.01c

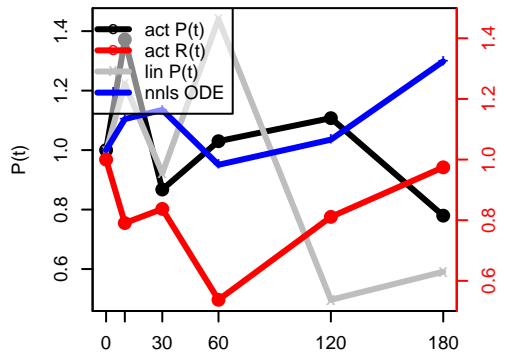

Time (min)  
ks = 0.079260417530401 kd = 0.0566229057942673

SPBC215.12

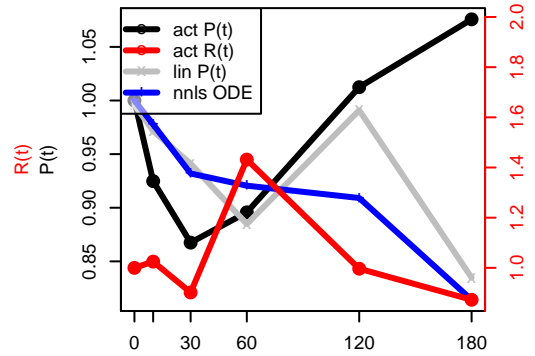

Time (min)  
ks = 0.00739881447191865 kd = 0.00985252989488151

SPBC29A10.10c

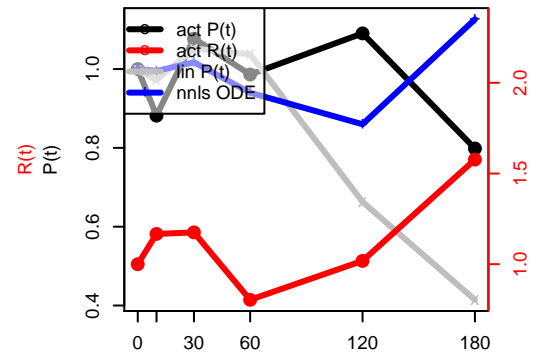

Time (min)  
ks = 0.0213182395694483 kd = 0.0237046148246902

SPBC32H8.08c

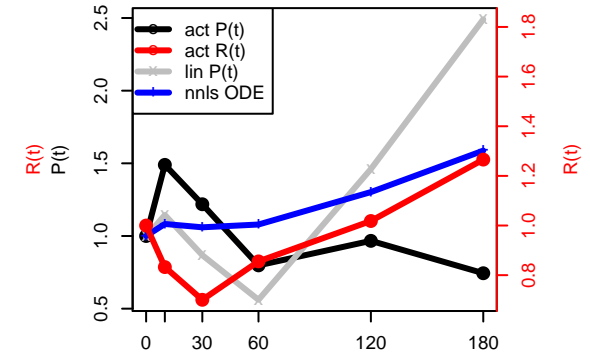

Time (min)  
ks = 0.0547162613172694 kd = 0.0398711967178771

SPBC8D2.20c

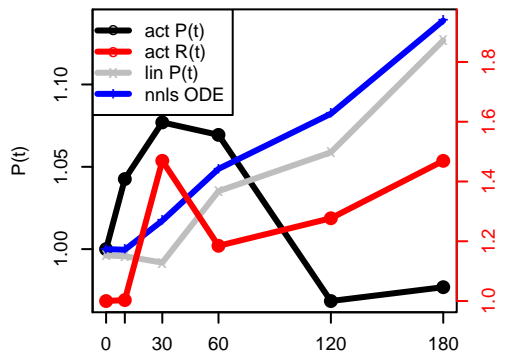

Time (min)  
ks = 0.0038074133663449 kd = 0.00385081766977747

SPCC1620.01c

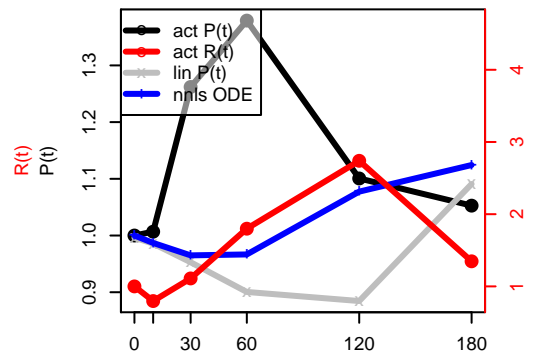

Time (min)  
ks = 0.00280313012634268 kd = 0.00385081766977747

SPCC1902.01

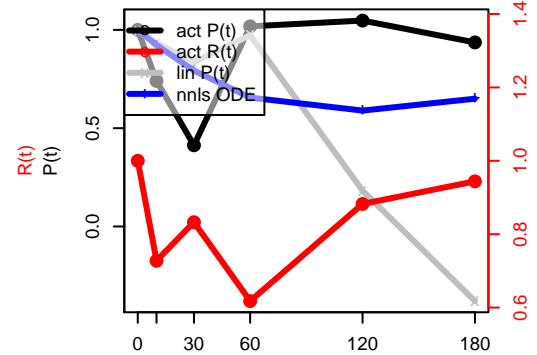

Time (min)  
ks = 0.0169874066487324 kd = 0.0232493586981007

SPCC830.03

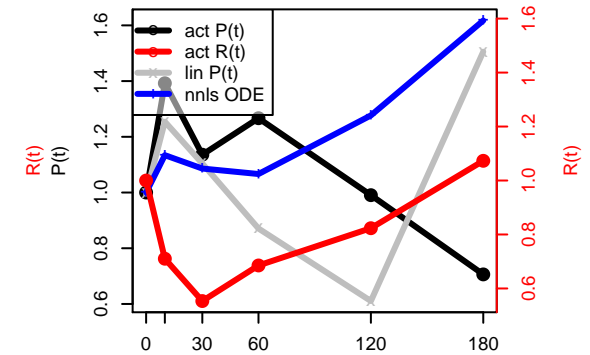

Time (min)  
ks = 0.0636847355582557 kd = 0.0378755065919942



SPAC1687.06c

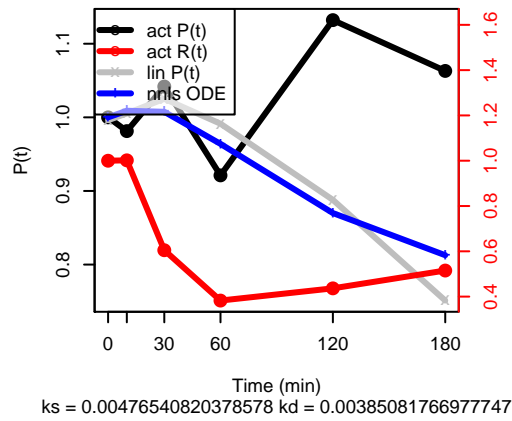

SPAC17A2.09c

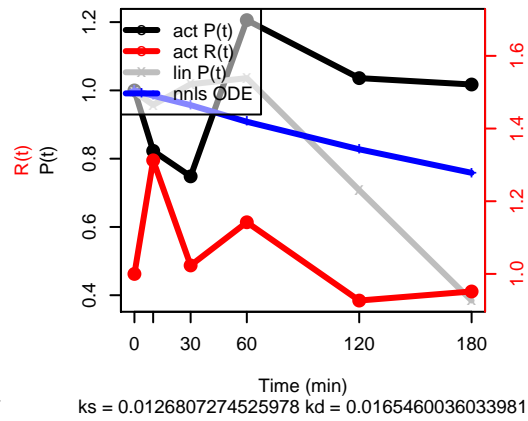

SPAC22H10.08

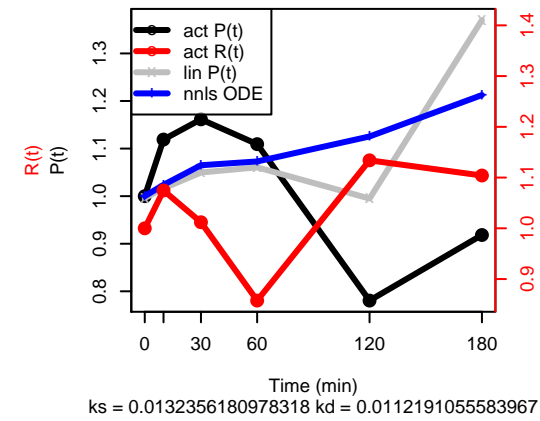

SPAC23H4.03c

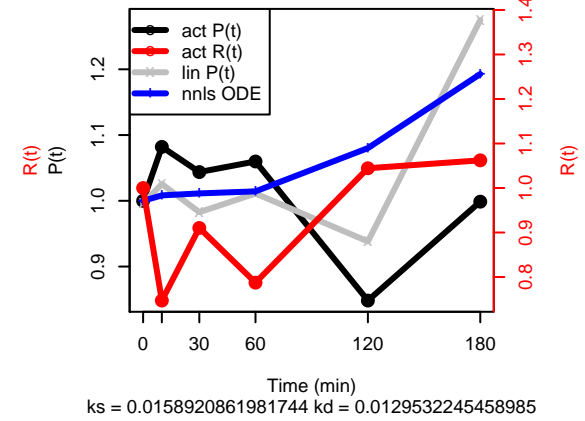

SPAC25H1.07

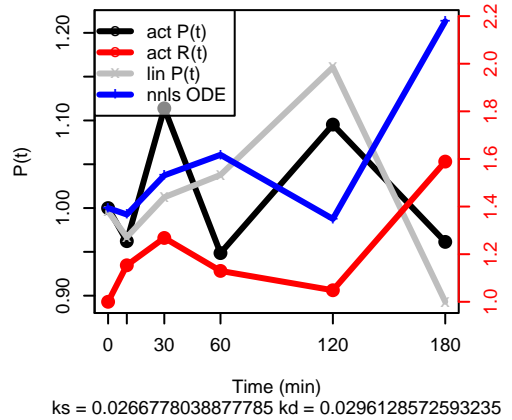

SPAC26A3.05

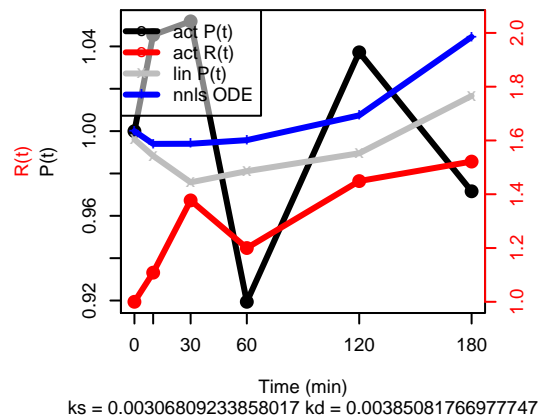

SPAC664.06

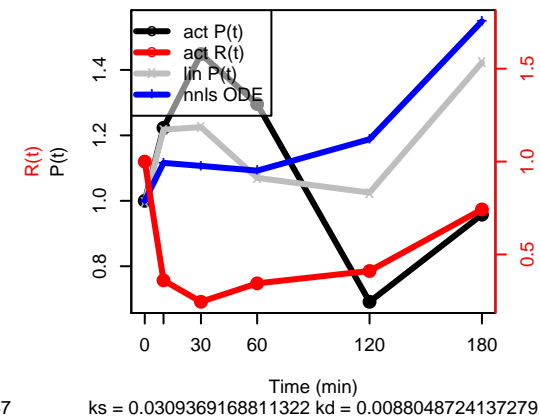

SPAC6F12.05c

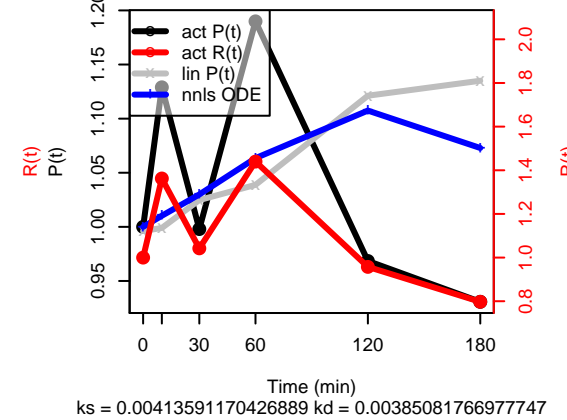

SPAC8F11.08c

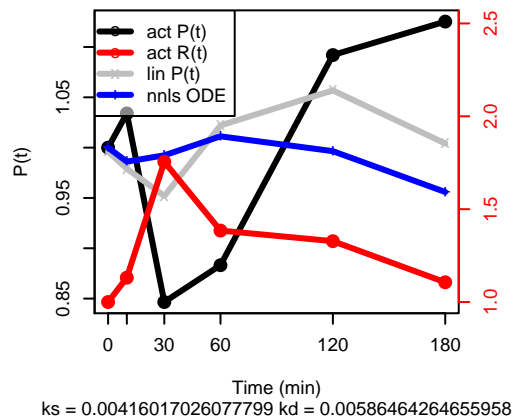

SPAPJ696.01c

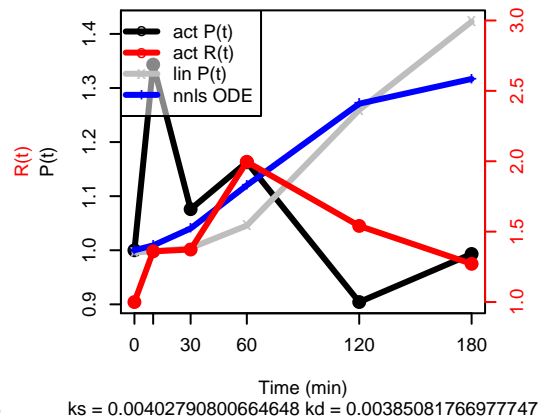

SPBC12C2.03c

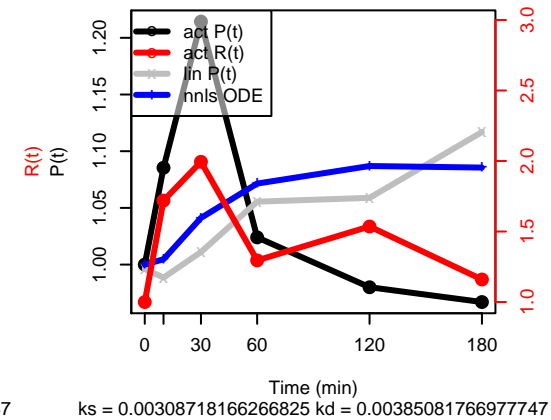

SPBC16A3.10

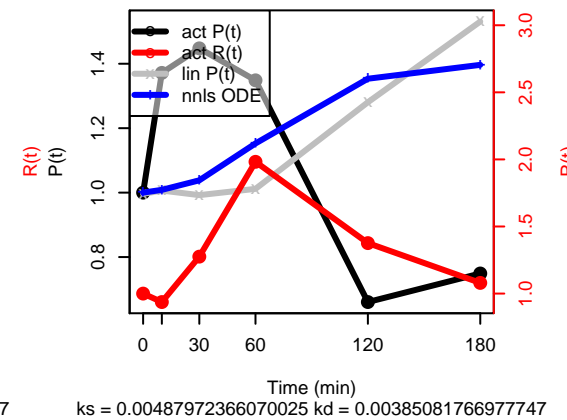

SPBC1861.08c

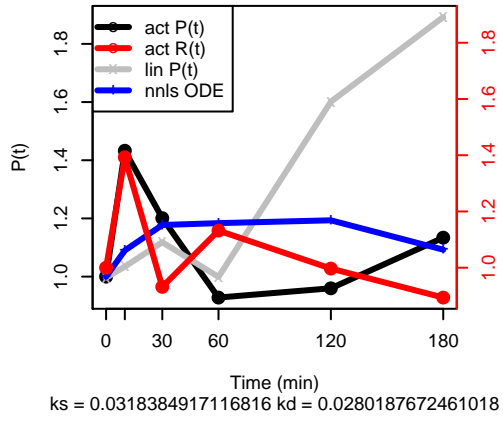

SPBC4B4.09

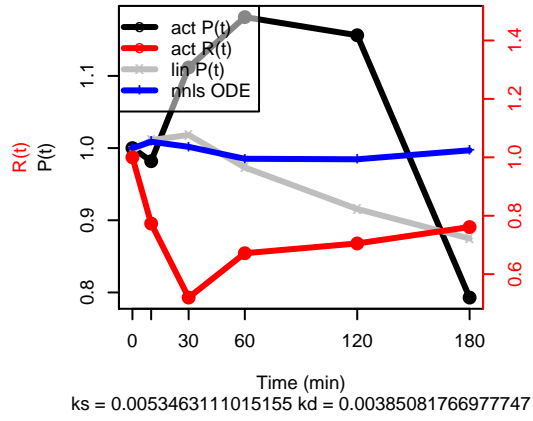

SPBP4H10.13

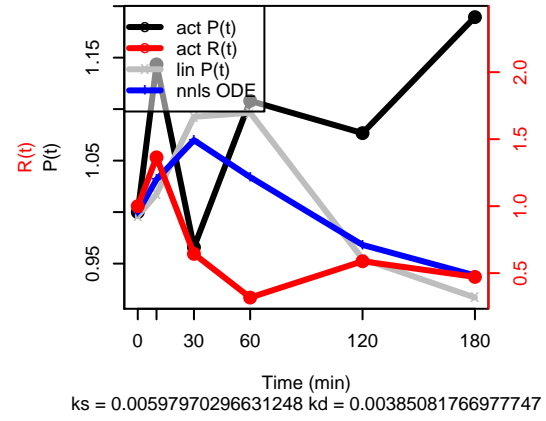

SPBP8B7.29

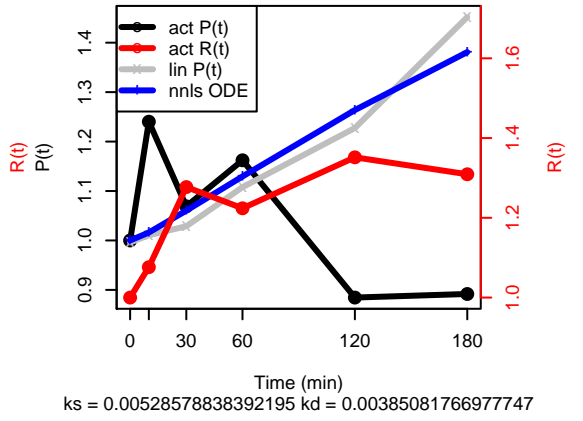

SPCC1393.03

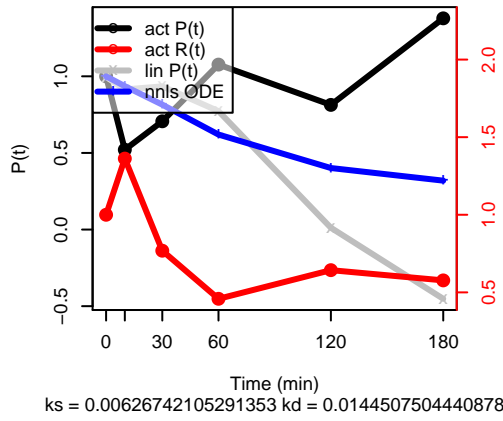

SPCC1393.06c

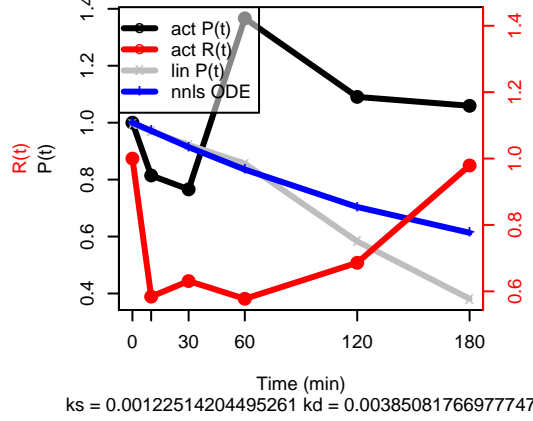

SPCC24B10.21

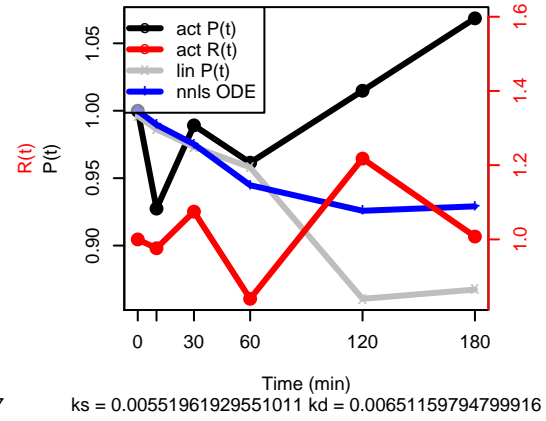

SPCC330.03c

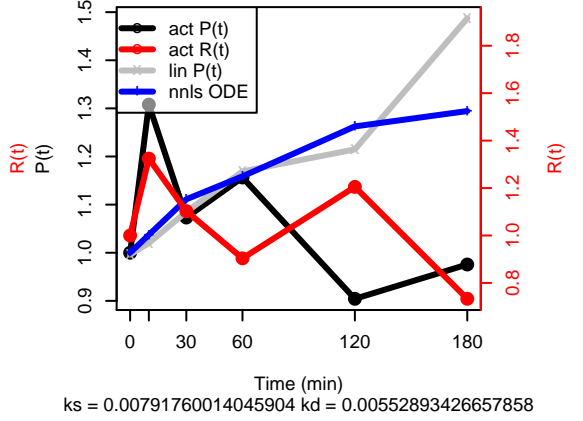

SPAC1250.01

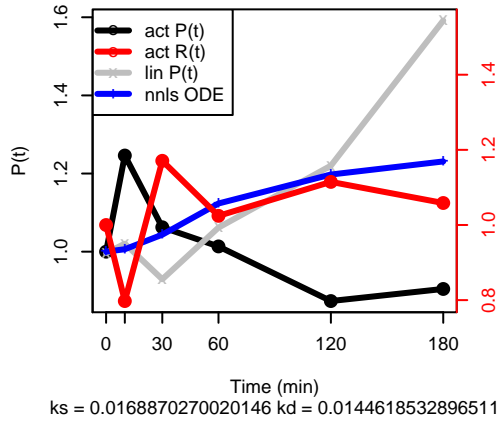

SPAC1952.17c

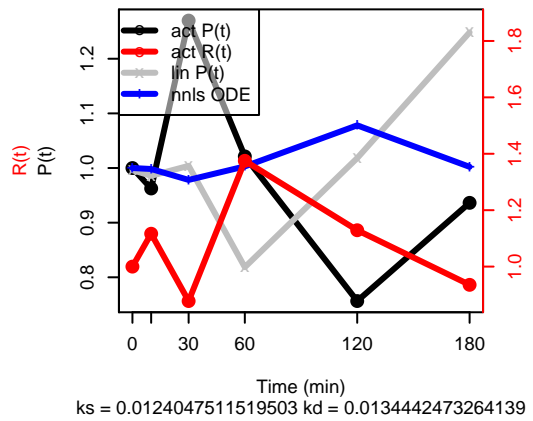

SPAC19A8.04

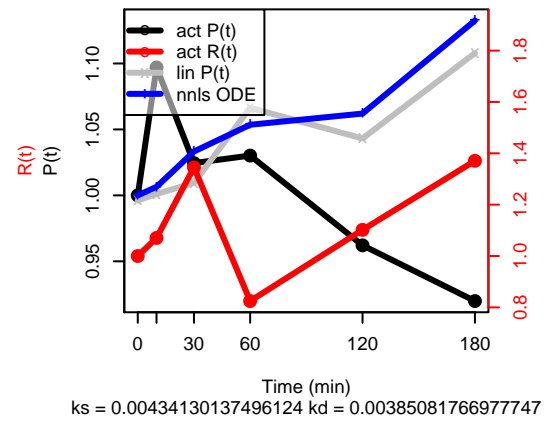

SPAC1F3.02c

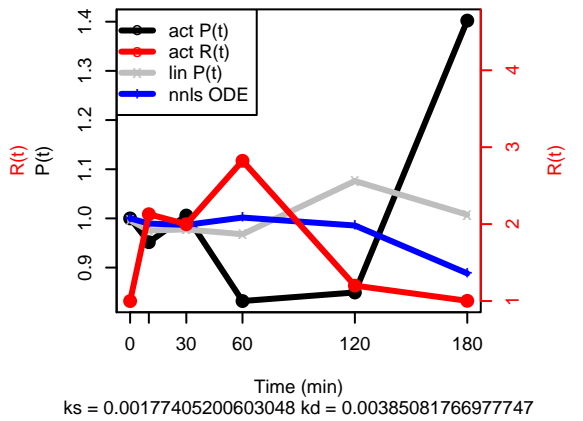

SPAC1F5.02

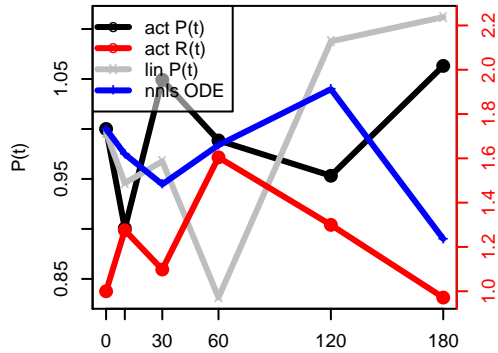

Time (min)  
ks = 0.0150099816977765 kd = 0.0200430487279466

SPAC22F8.06

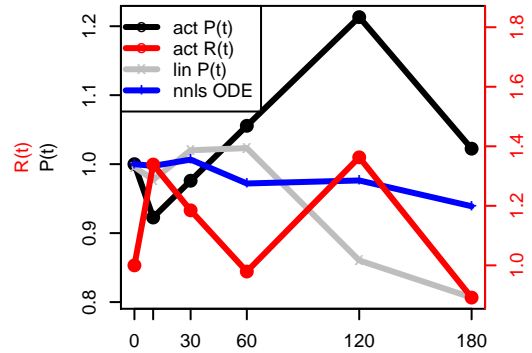

Time (min)  
ks = 0.00935667714327675 kd = 0.0112514003320954

SPBC11G11.02c

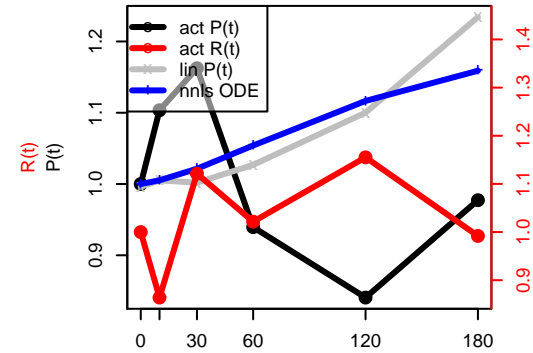

Time (min)  
ks = 0.00473646604361556 kd = 0.00385081766977747

SPBC1711.16

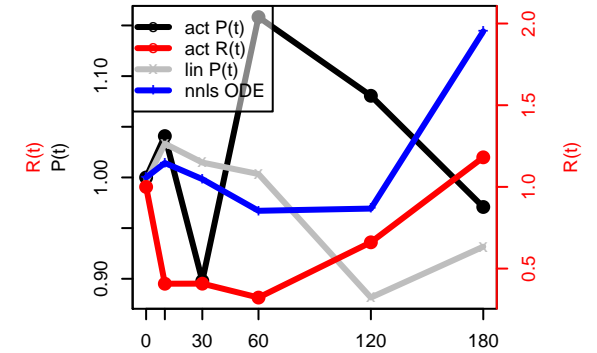

Time (min)  
ks = 0.0075916126376344 kd = 0.00386883649630208

SPBC1A4.08c

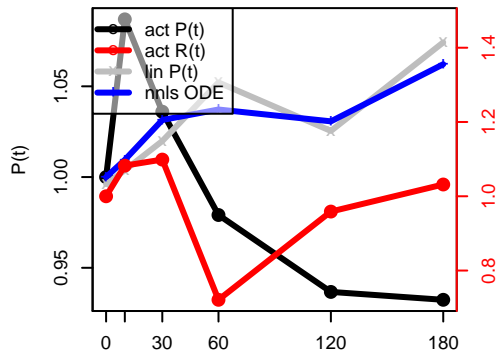

Time (min)  
ks = 0.00461021692280934 kd = 0.00385081766977747

SPBC2D10.18

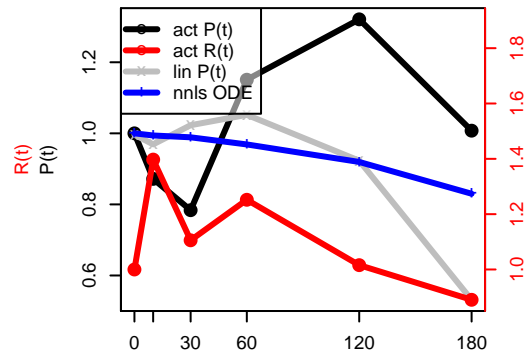

Time (min)  
ks = 0.00963279671188261 kd = 0.0123478811239829

SPBC2G2.02

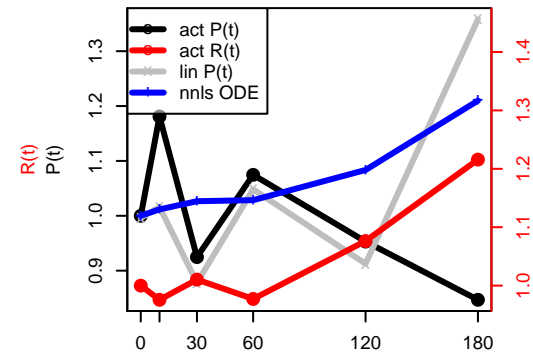

Time (min)  
ks = 0.0449635718121375 kd = 0.042989351918458

SPBC36B7.03

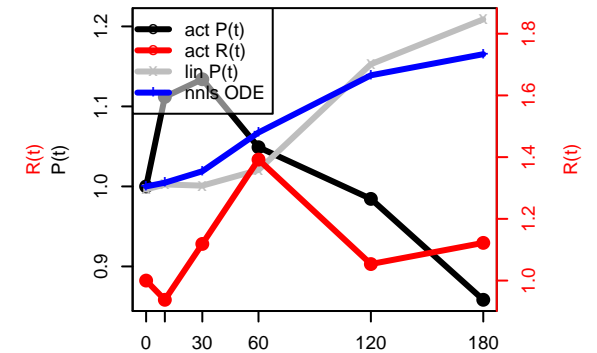

Time (min)  
ks = 0.00448513050222178 kd = 0.00385081766977747

SPBC409.20c

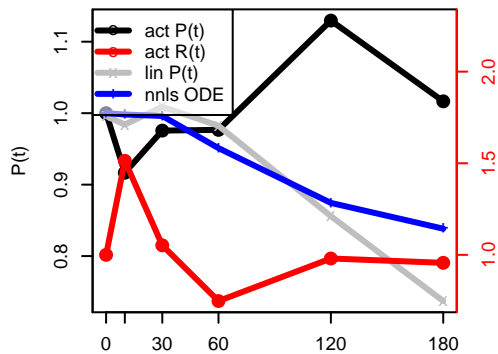

Time (min)  
ks = 0.00398783336964879 kd = 0.00521231593201729

SPBC530.03c

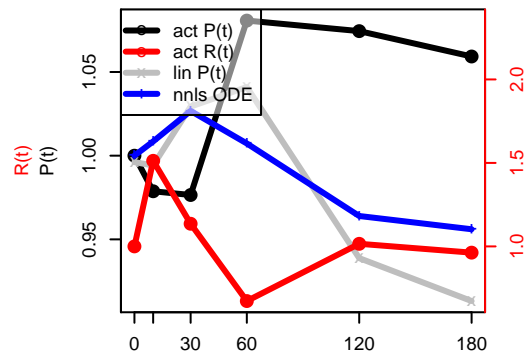

Time (min)  
ks = 0.00365364180929597 kd = 0.00385081766977747

SPCC1281.05

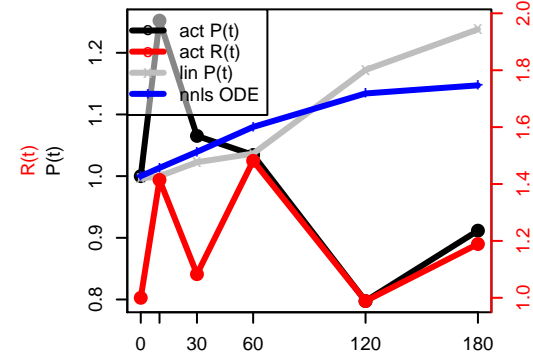

Time (min)  
ks = 0.00421498090876231 kd = 0.00385081766977747

SPCC1672.03c

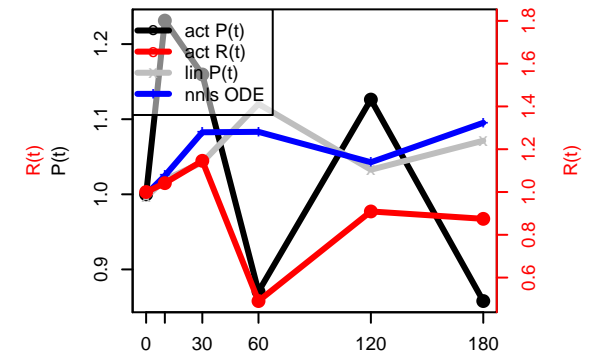

Time (min)  
ks = 0.00921708199485252 kd = 0.00686964477918406

SPCC1840.06

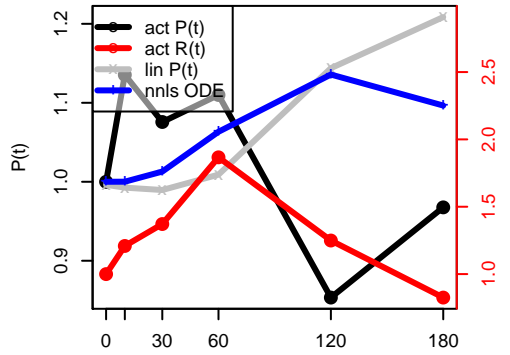

Time (min)  
ks = 0.00349301431250188 kd = 0.00385081766977747

SPCC736.07c

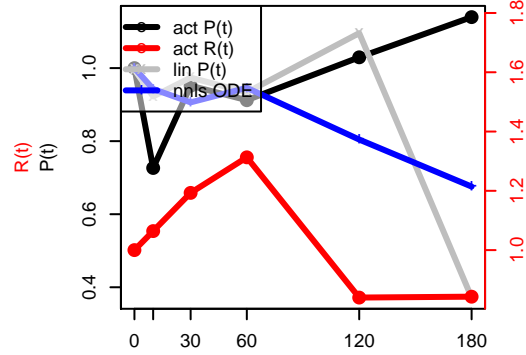

Time (min)  
ks = 0.0235342658639017 kd = 0.030915254497274

SPAC1687.21

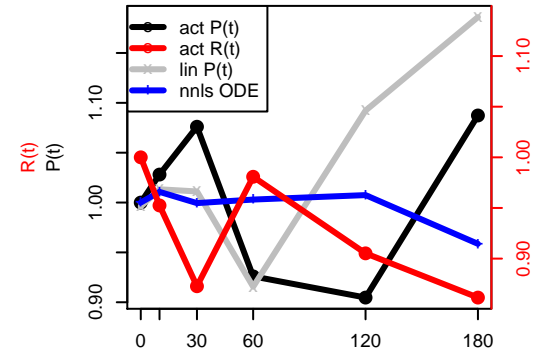

Time (min)  
ks = 0.0247374378435375 kd = 0.0230236759675767

SPAC22H10.05c

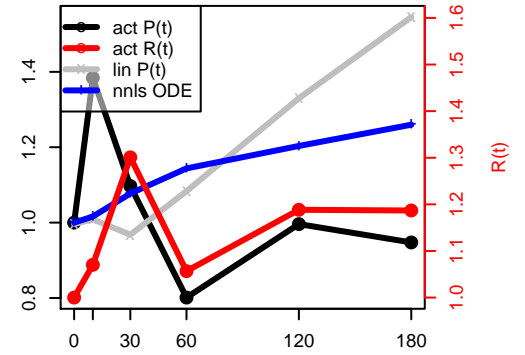

Time (min)  
ks = 0.0121063005326272 kd = 0.0108402770018221

SPAC23C4.02

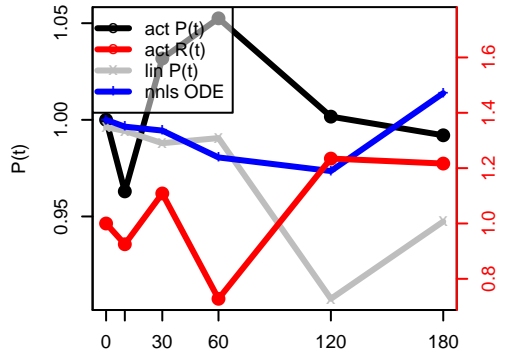

Time (min)  
ks = 0.00366409278333007 kd = 0.00385081766977747

SPAC23D3.10c

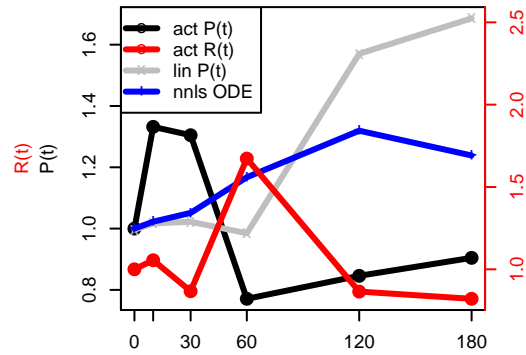

Time (min)  
ks = 0.00904604407400272 kd = 0.0069681026078177

SPAC2C4.03c

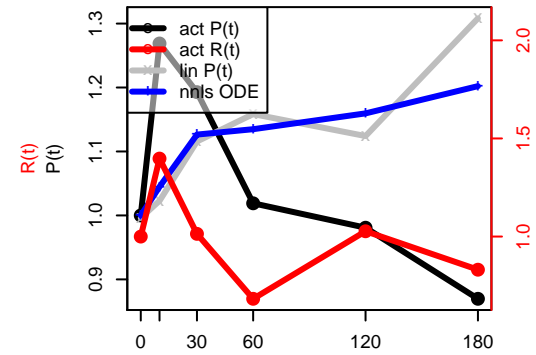

Time (min)  
ks = 0.00978478312319846 kd = 0.0071190246277521

SPAC30D11.13

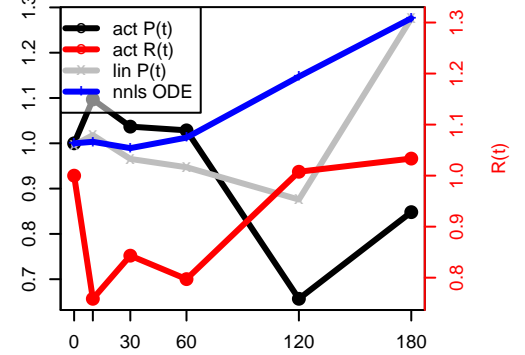

Time (min)  
ks = 0.014886692206998 kd = 0.0126945679140587

SPAC6G9.12

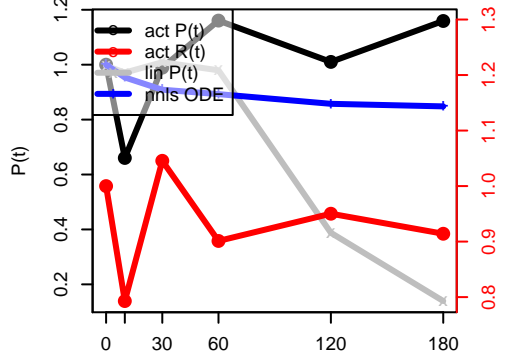

Time (min)  
ks = 0.0267901159119224 kd = 0.0293009297491056

SPBC2G2.16

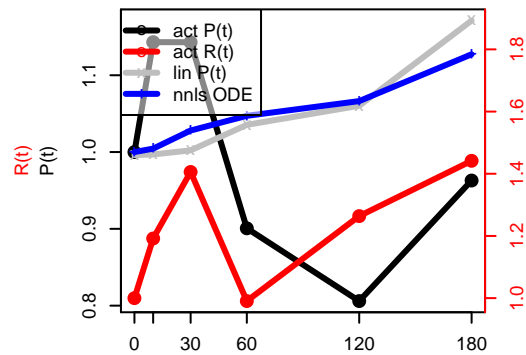

Time (min)  
ks = 0.00391862541723977 kd = 0.00385081766977747

SPBC83.01

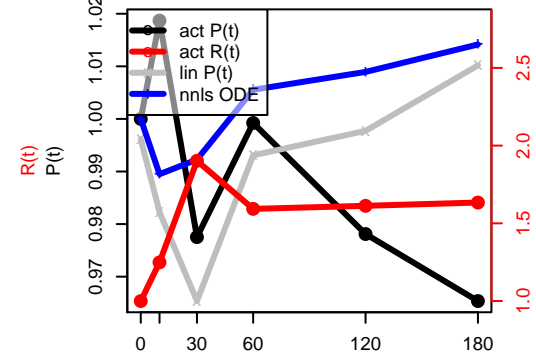

Time (min)  
ks = 0.00246418674694439 kd = 0.00385081766977747

SPCC1281.06c

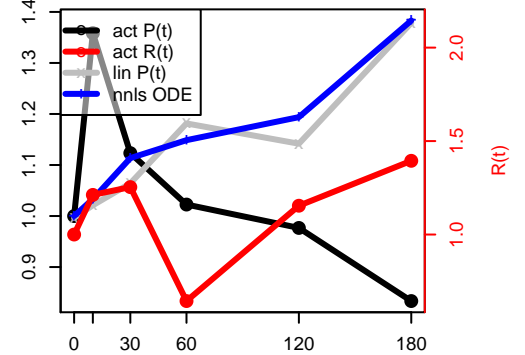

Time (min)  
ks = 0.00849697760044416 kd = 0.00600068958815389

SPCC1827.03c

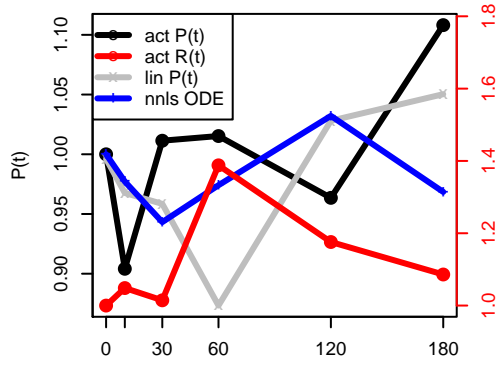

Time (min)  
ks = 0.0146947981867803 kd = 0.0175468806442264

SPCC306.08c

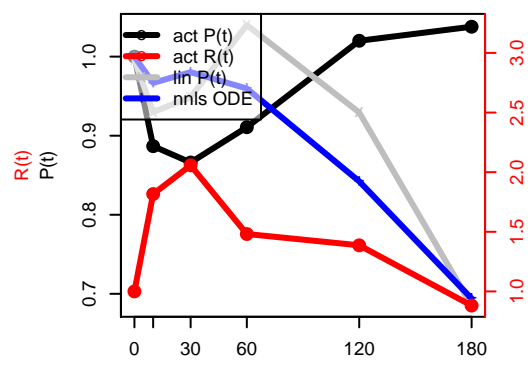

Time (min)  
ks = 0.0073683916367294 kd = 0.0140079850456278

SPAC16C9.03

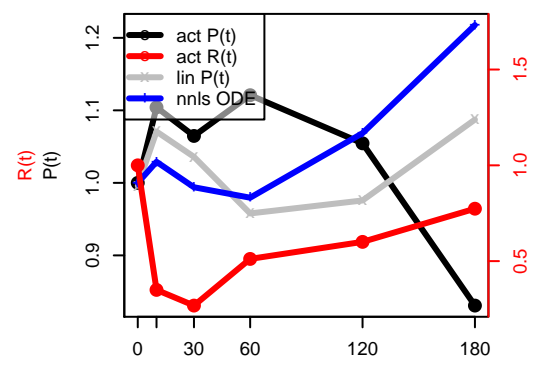

Time (min)  
ks = 0.0132380445948102 kd = 0.00577598161994543

SPAC4H3.10c

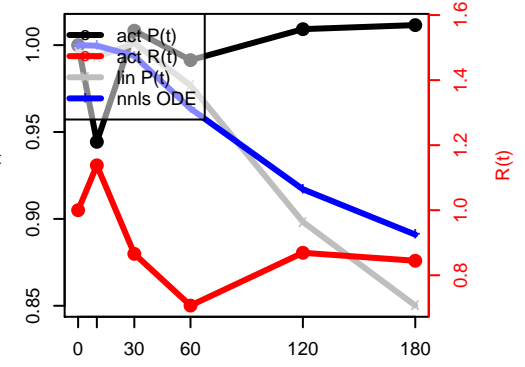

Time (min)  
ks = 0.00354834915460438 kd = 0.00385081766977747

SPAC6G10.05c

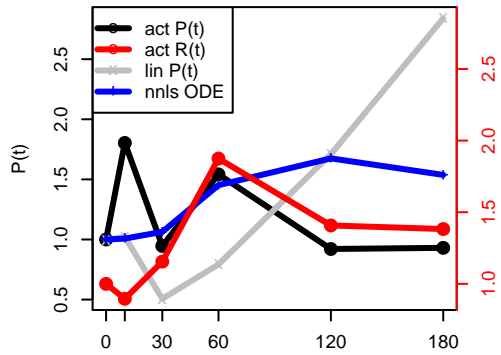

Time (min)  
ks = 0.0336868162975148 kd = 0.031043194900147

SPAC9.03c

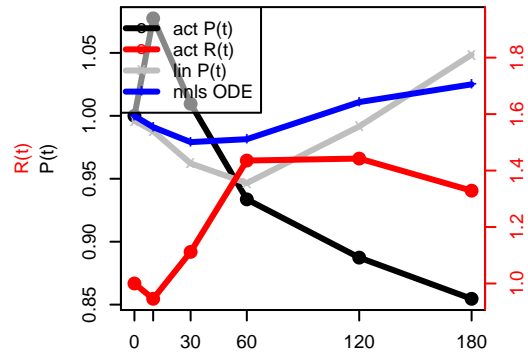

Time (min)  
ks = 0.00302712668382622 kd = 0.00385081766977747

SPBC1734.14c

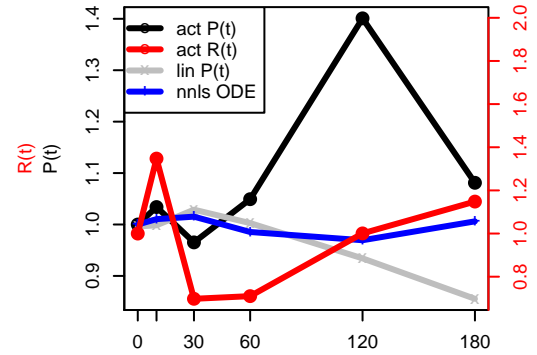

Time (min)  
ks = 0.00408127581277369 kd = 0.00385081766977747

SPBC2G2.04c

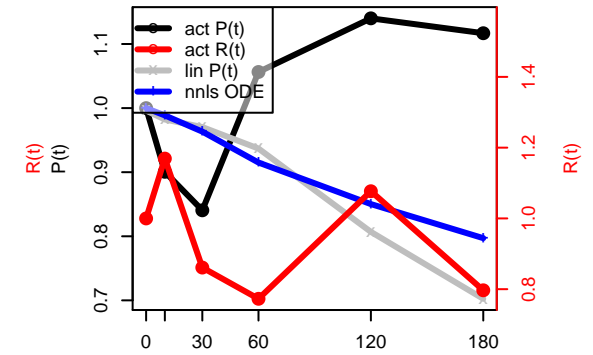

Time (min)  
ks = 0.00246041620800227 kd = 0.00385081766977747

SPBC3B8.09

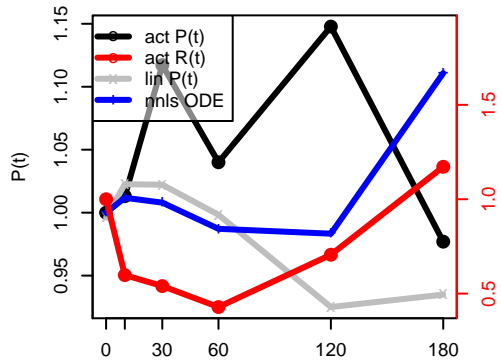

Time (min)  
ks = 0.00649274260084178 kd = 0.00385081766977747

SPCC1827.01c

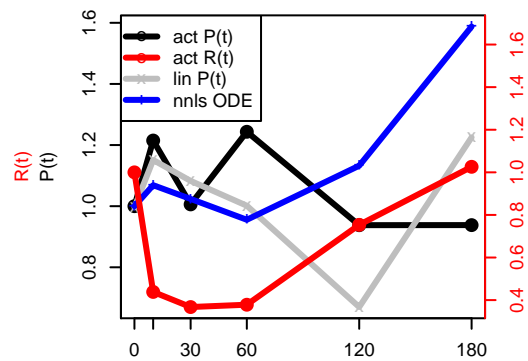

Time (min)  
ks = 0.0286679545622726 kd = 0.0131658367332929

SPAC3H8.10

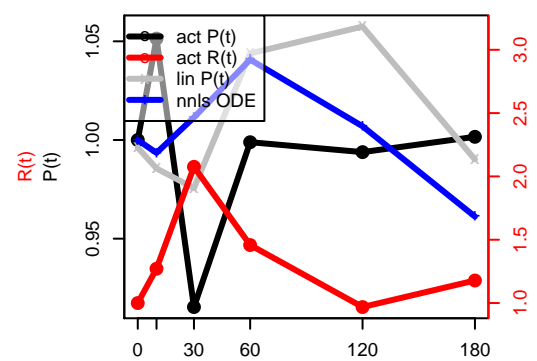

Time (min)  
ks = 0.00279352697886769 kd = 0.00385081766977747

SPAC630.12

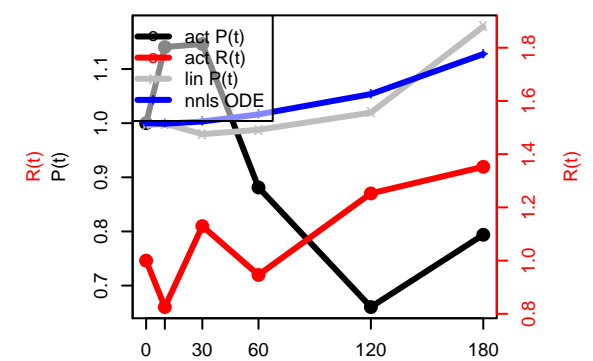

Time (min)  
ks = 0.00414547725267879 kd = 0.00385081766977747

SPAC9.02c

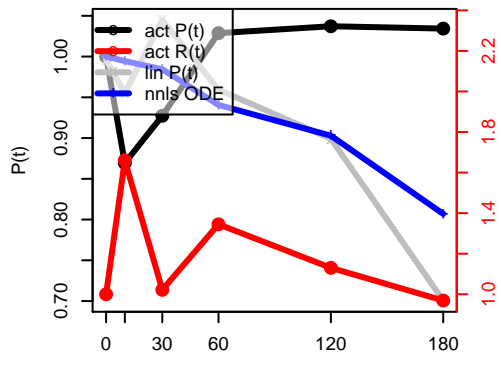

SPAPB1A10.04c

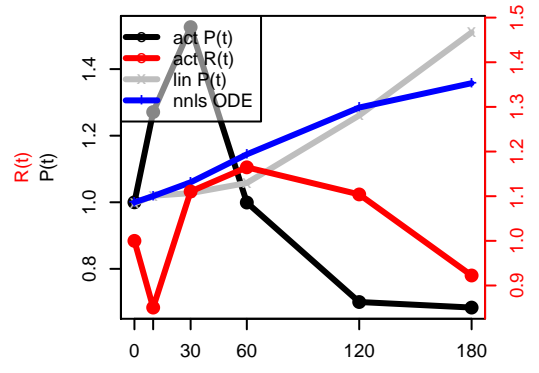

SPBC16G5.10

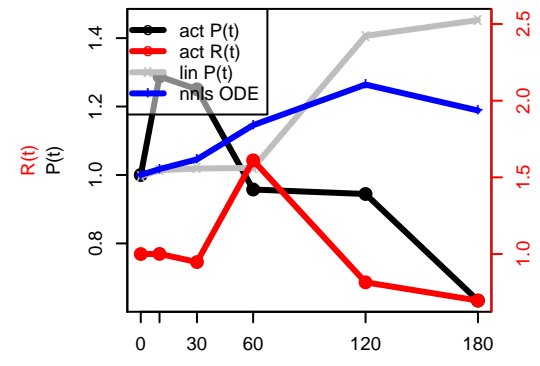

SPBC2G2.13c

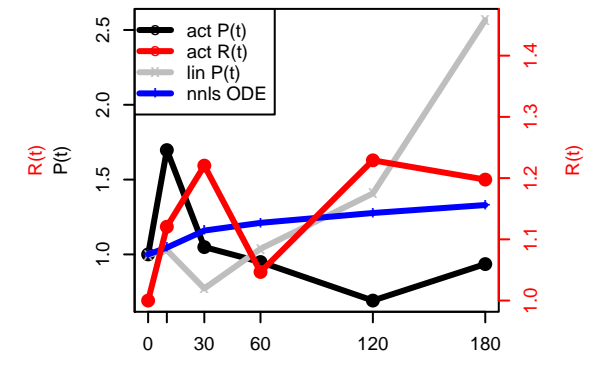

SPBC839.05c

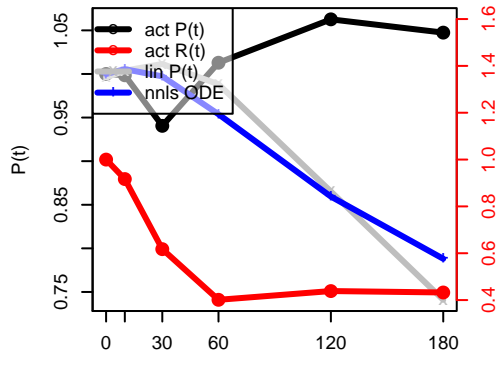

SPCC1393.02c

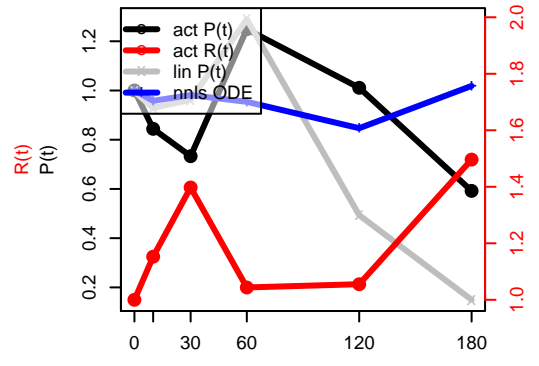

SPCC1919.10c

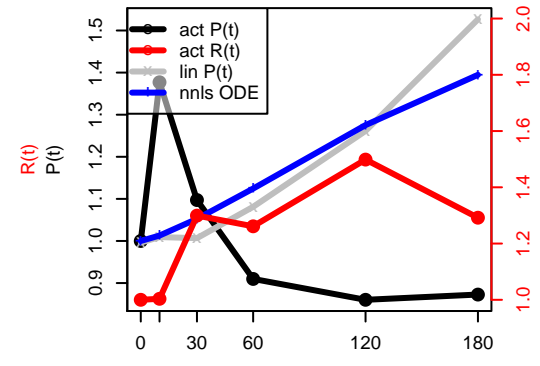

SPCC338.07c

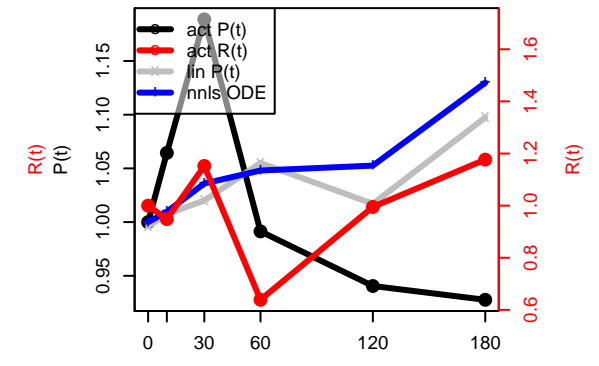

SPAC14C4.14

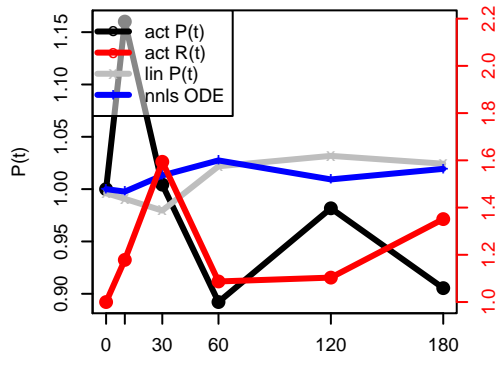

SPAC17G6.05c

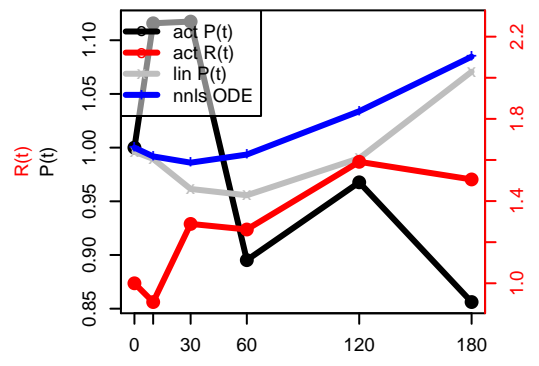

SPAC17H9.02

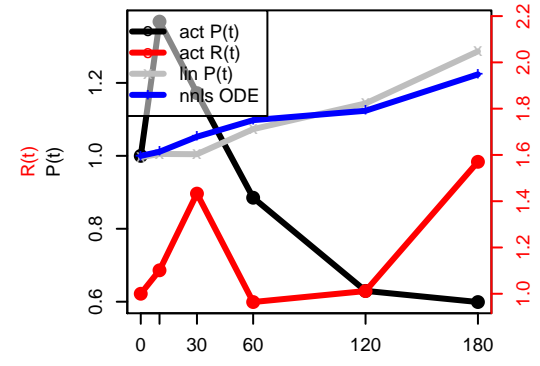

SPAC4A8.14

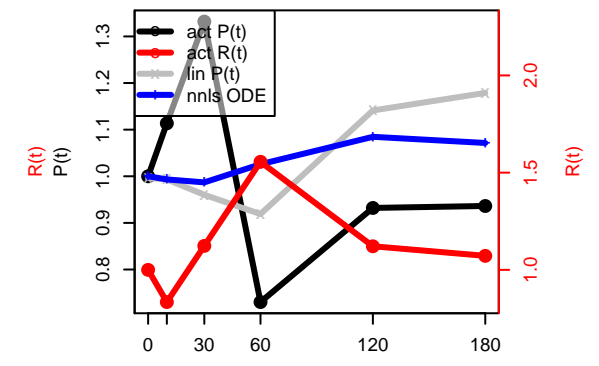

SPBC8D2.15

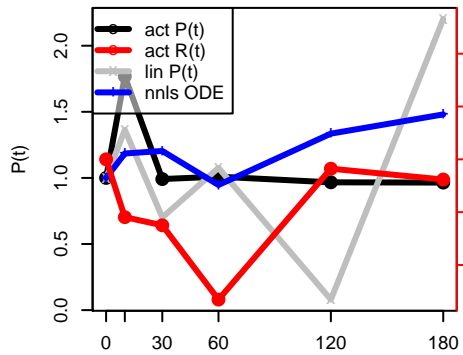

Time (min)  
ks = 0.0994484004773202 kd = 0.0626610457544289

SPCC965.04c

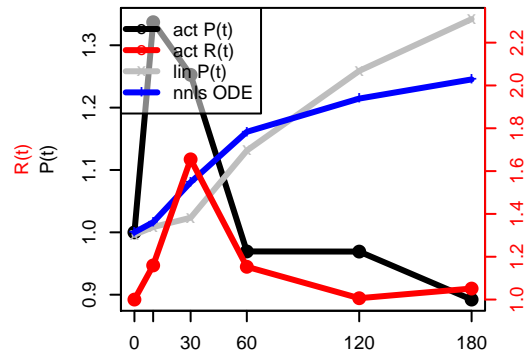

Time (min)  
ks = 0.00508393048182824 kd = 0.00385081766977747

SPAC18B11.10

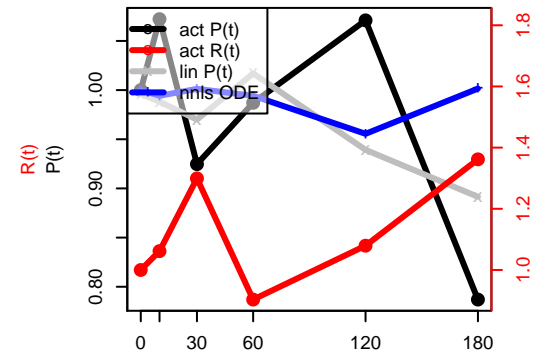

Time (min)  
ks = 0.00613460815831679 kd = 0.00692631471293048

SPAC1F5.06

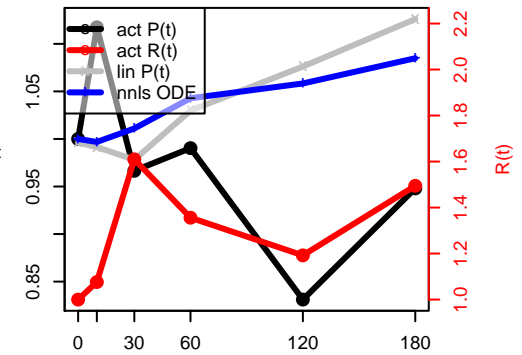

Time (min)  
ks = 0.00338205874343024 kd = 0.00385081766977747

SPAC644.05c

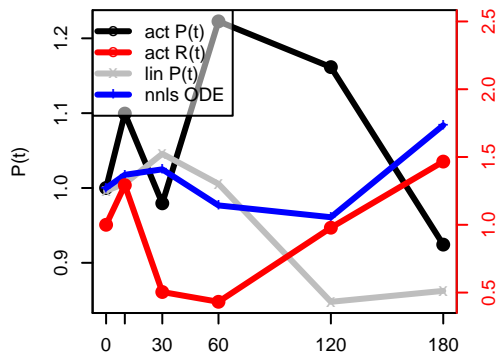

Time (min)  
ks = 0.0048195812712226 kd = 0.00385081766977747

SPBC211.04c

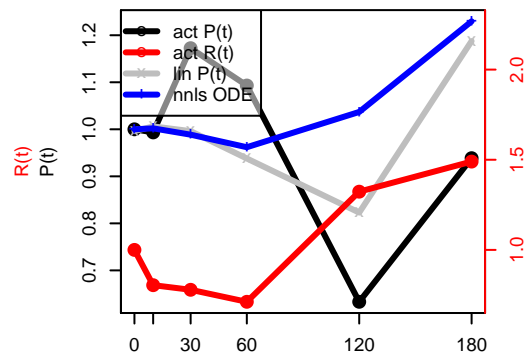

Time (min)  
ks = 0.00789487326055055 kd = 0.00689680477528843

SPBC4.04c

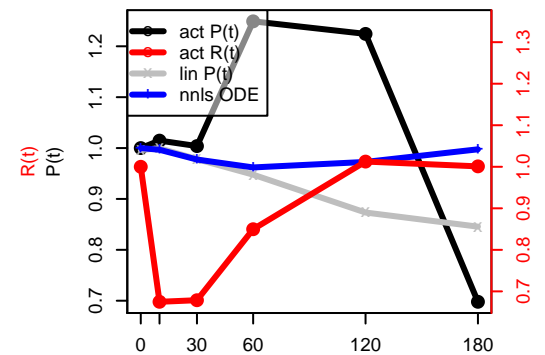

Time (min)  
ks = 0.0042000357062789 kd = 0.00385081766977747

SPBC646.16

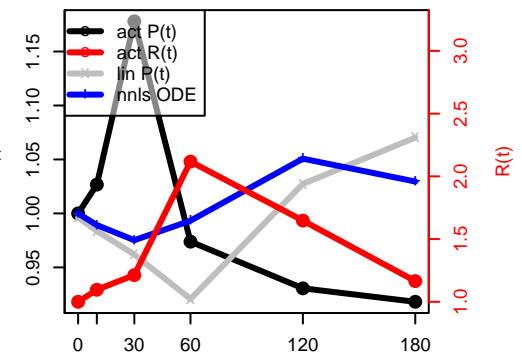

Time (min)  
ks = 0.00260952849151857 kd = 0.00385081766977747

SPBC1709.15c

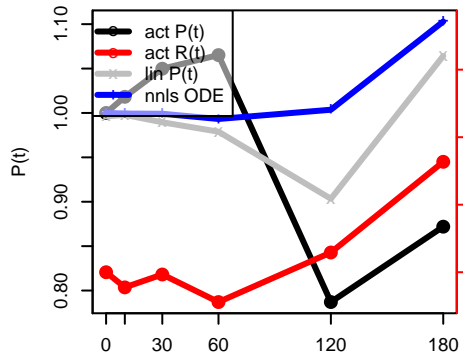

Time (min)  
ks = 0.00938259690547816 kd = 0.00921220714254945

SPBC902.04

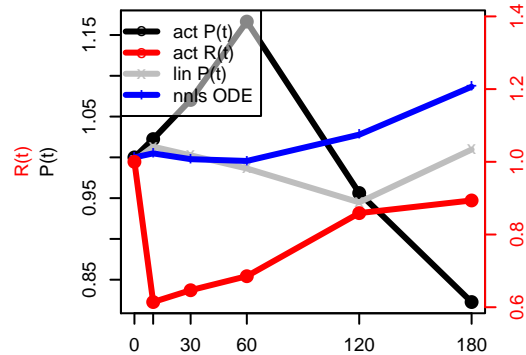

Time (min)  
ks = 0.00554423602848907 kd = 0.00385081766977747

SPCC31H12.07

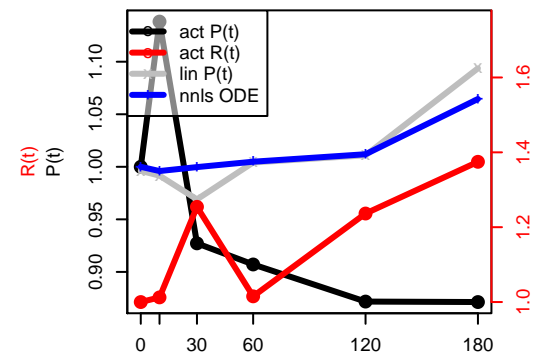

Time (min)  
ks = 0.00487010758532159 kd = 0.00532555896911175

SPCC188.06c

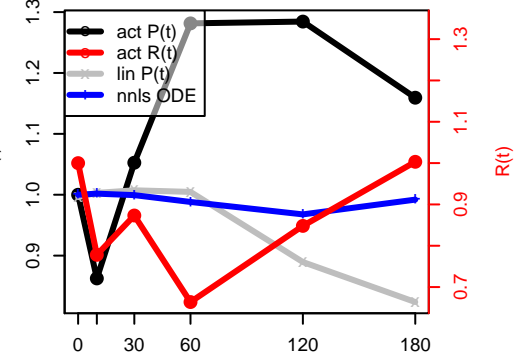

Time (min)  
ks = 0.0045414141532949 kd = 0.00385081766977747
