# Supplementary material for: One third of dynamic protein expression profiles can be predicted by a simple rate equation
Source: Royal Society of Chemistry journal article supplement (doi:10.1039/c4mb00358f), 2014-08-01
Supplement: c4mb00358f2.zip [file c4mb00358f2.zip]

IMD3

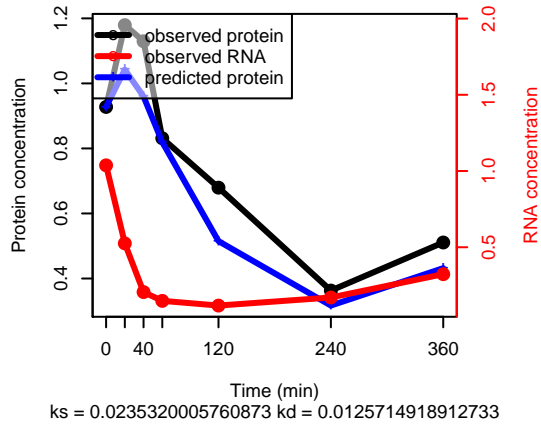

EFT2

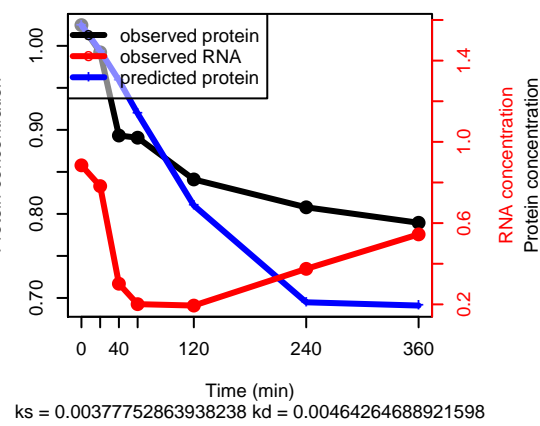

CPS1

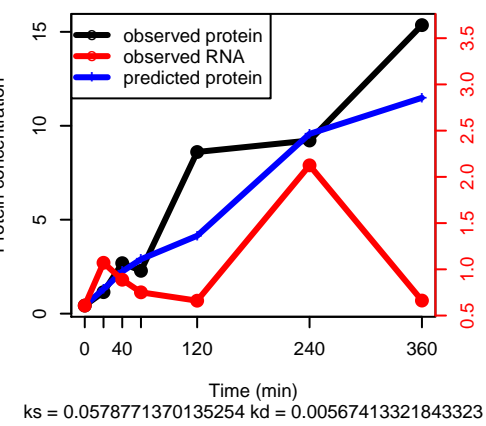

PYC1

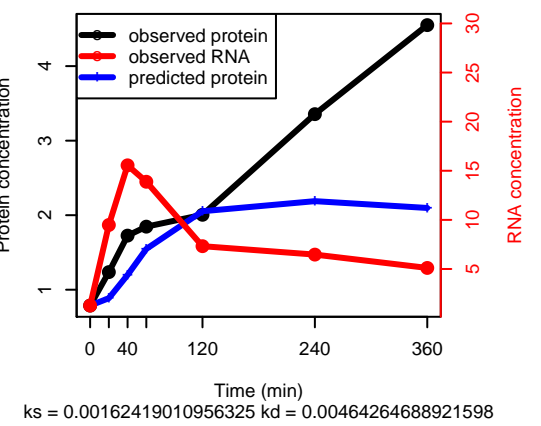

IDH1

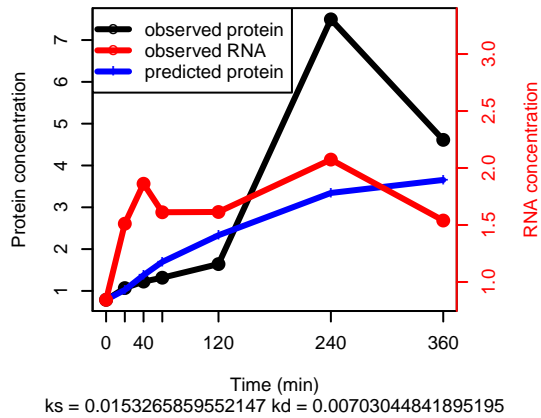

ASC1

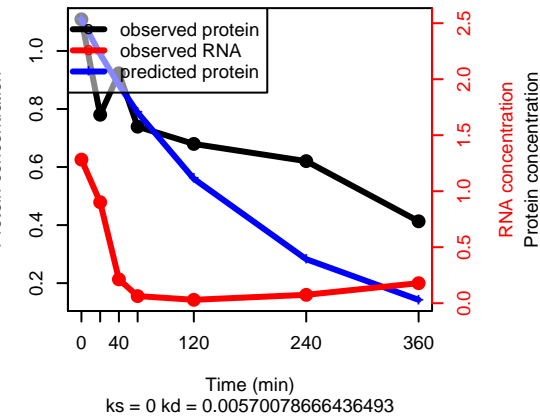

IMD4

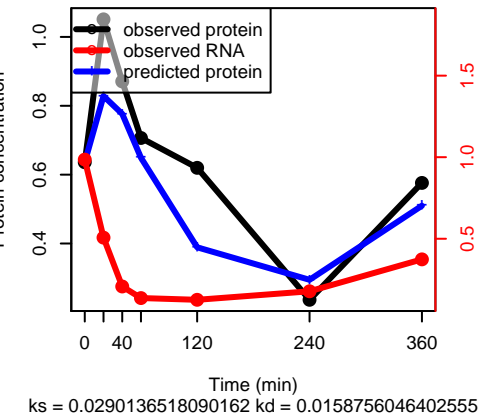

RPP0

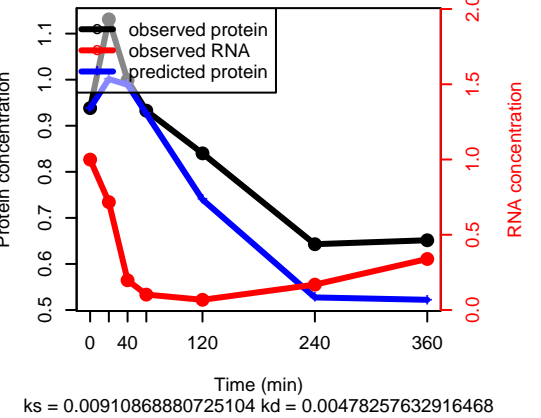

SHM2

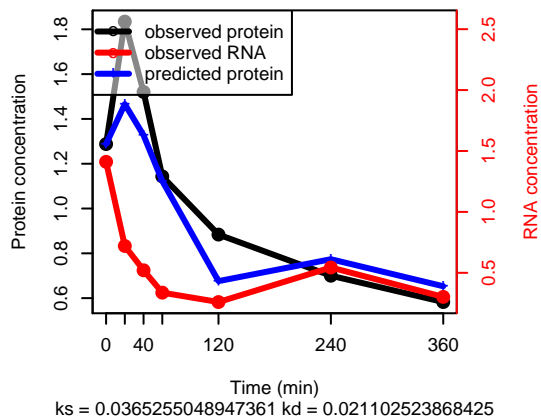

TYS1

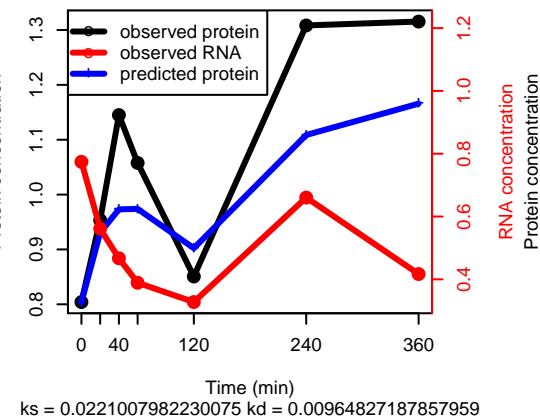

KRS1

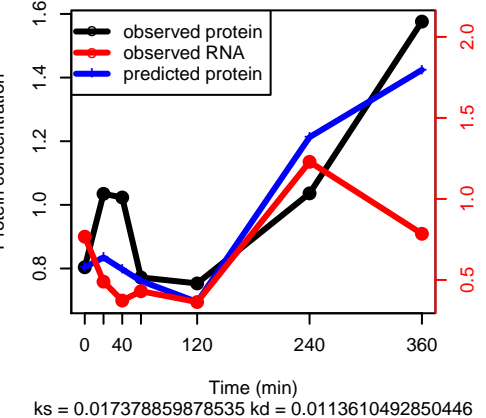

ARG1

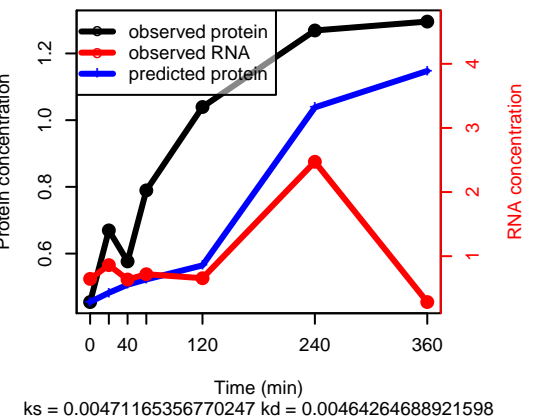

CDC48

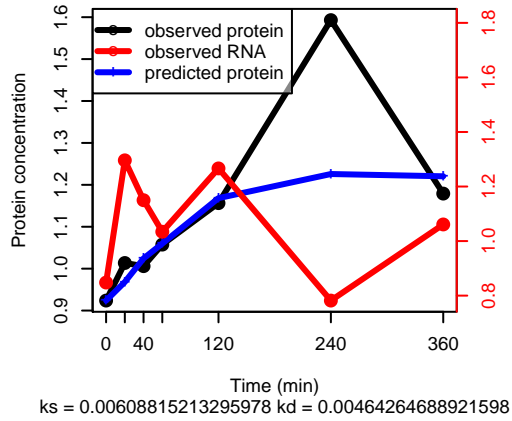

LEU4

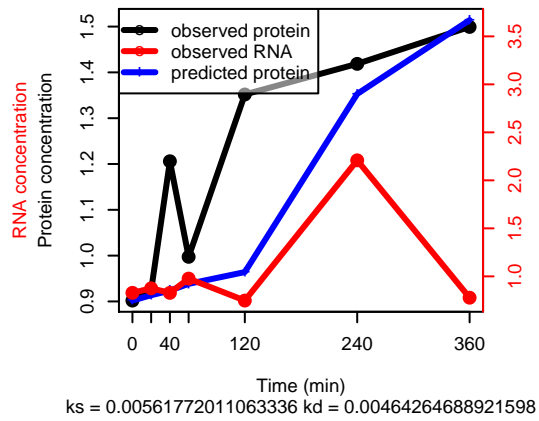

WTM1

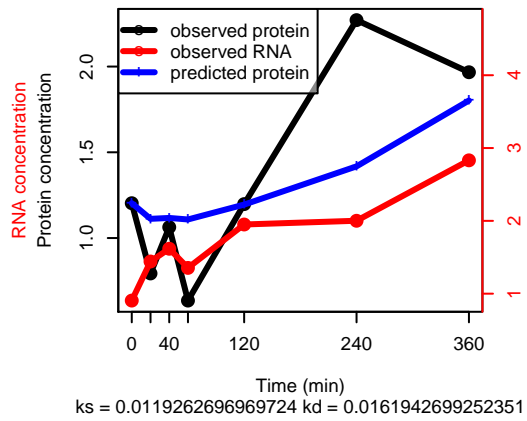

DLD3

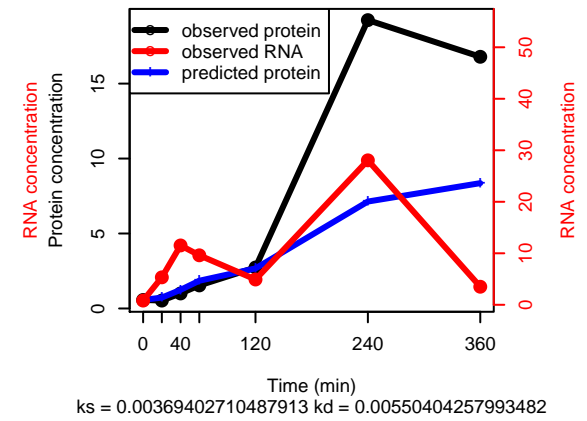

SSE2

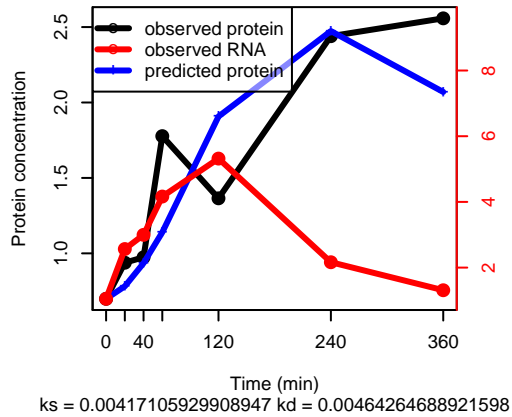

POR1

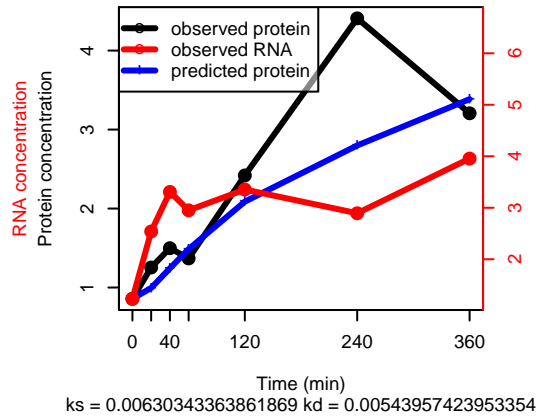

PEP4

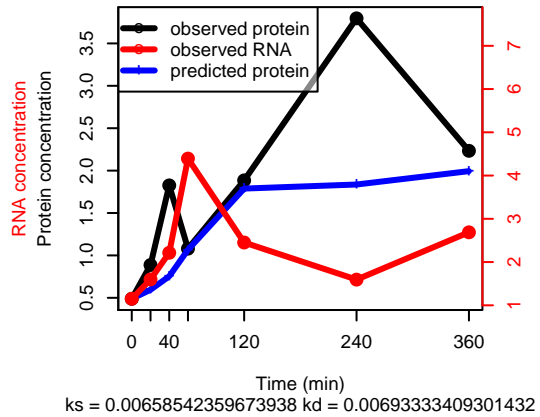

IDH2

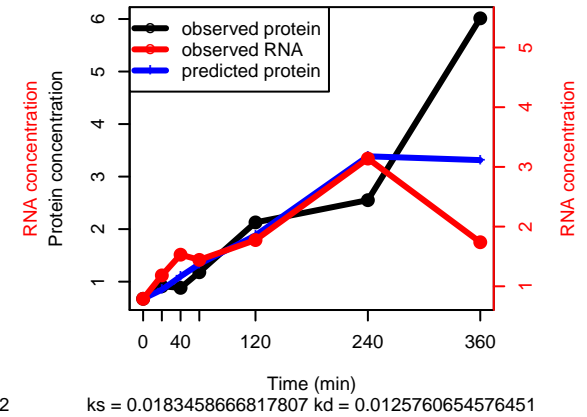

PRC1

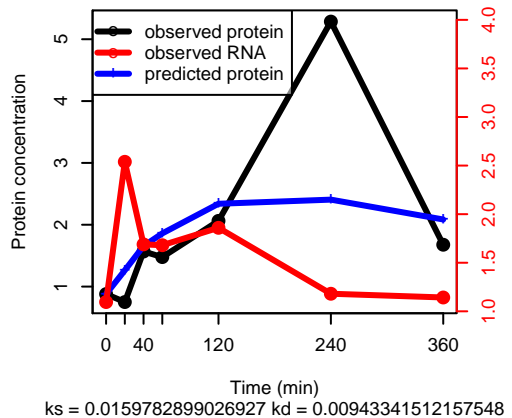

RPL12B

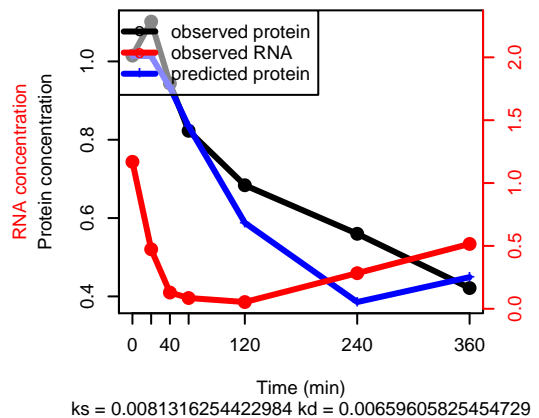

RPS10B

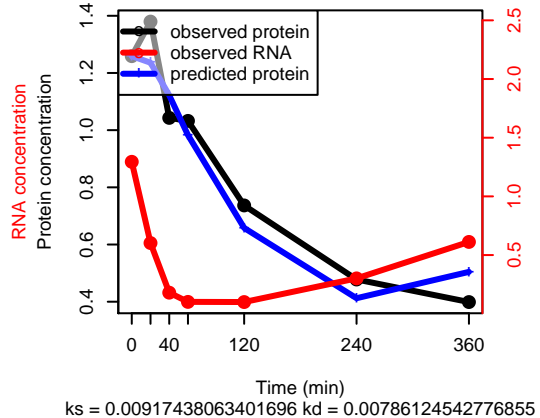

RPL6A

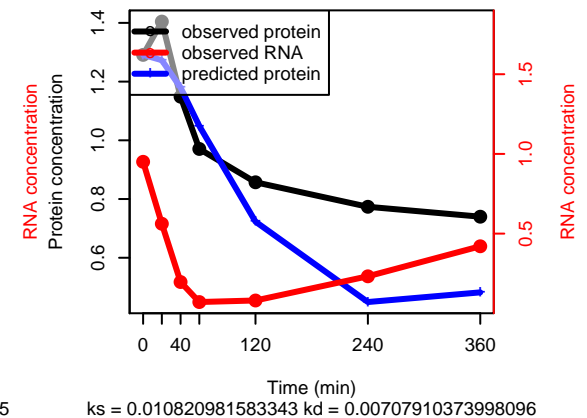

RPA190

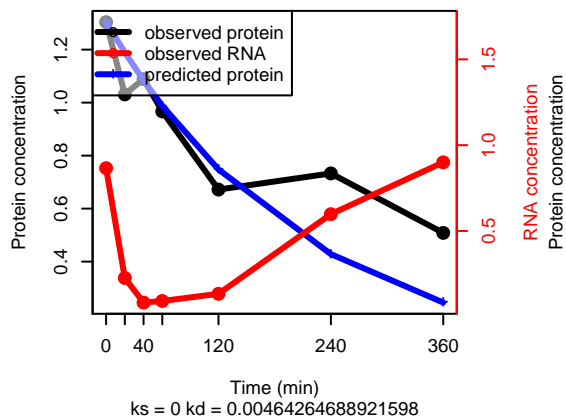

PRP43

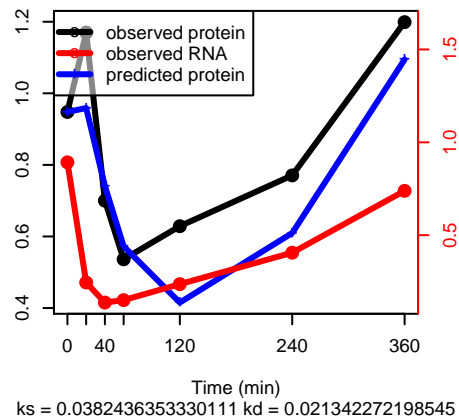

HTS1

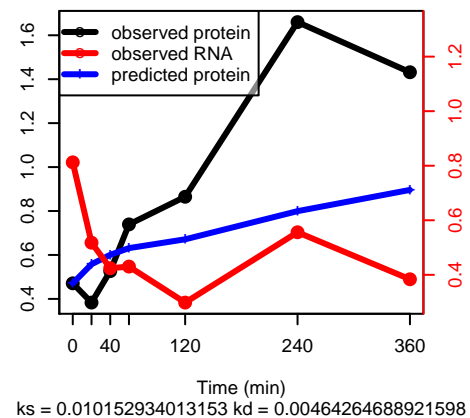

RPL7A

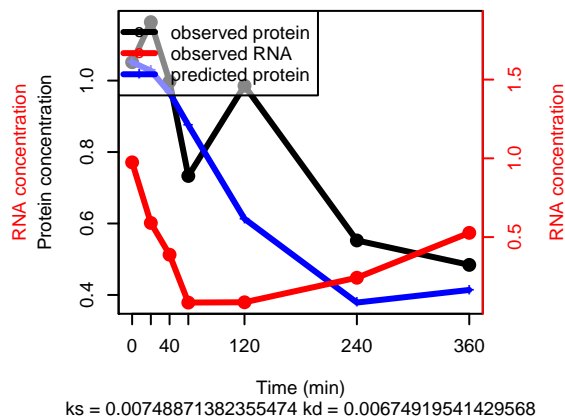

GLY1

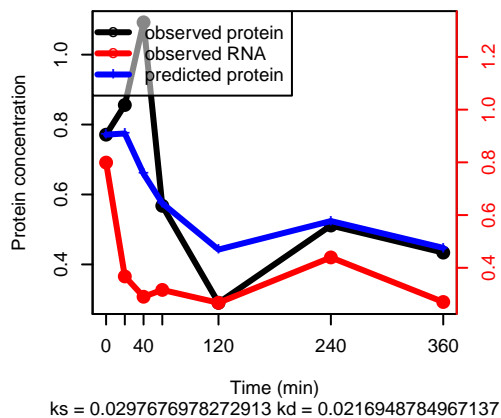

STM1

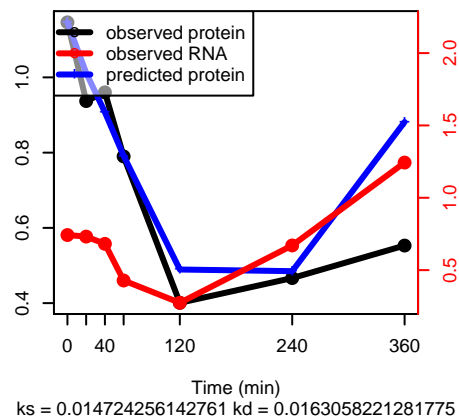

HOM6

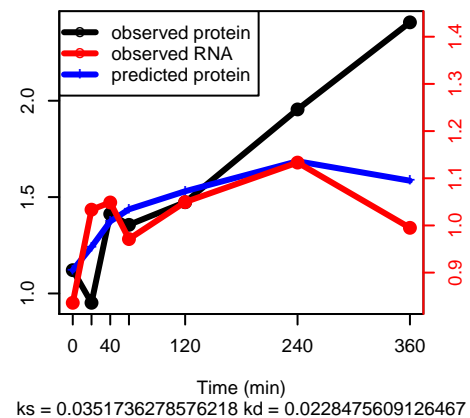

PDR5

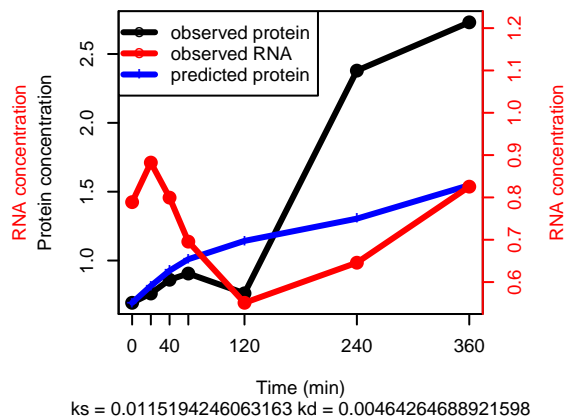

HSP82

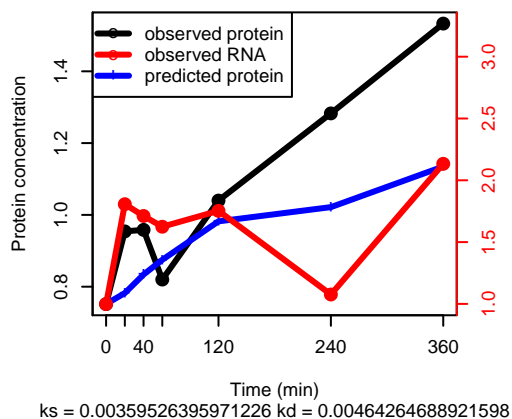

ECM33

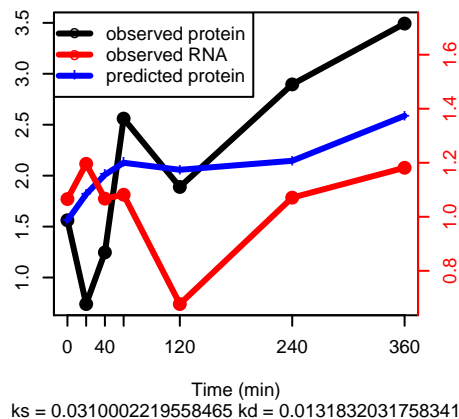

ACO1

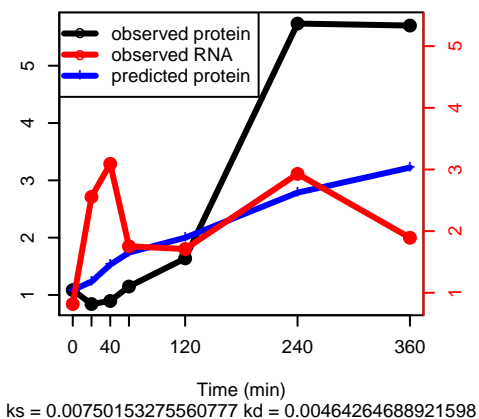

RPS7A

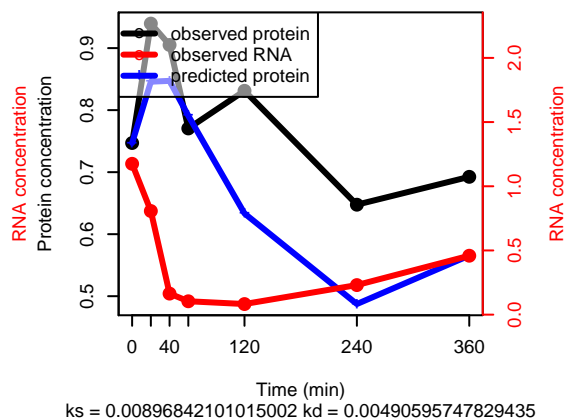

RPL6B

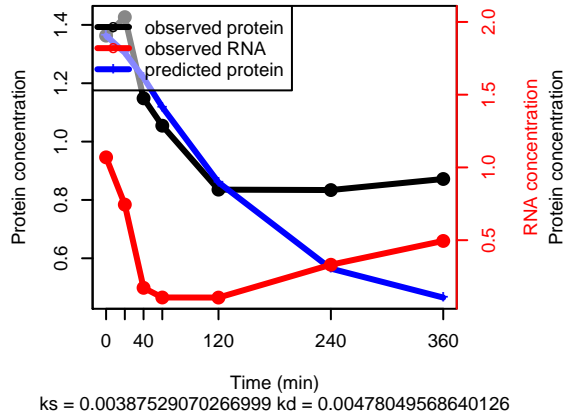

LEU9

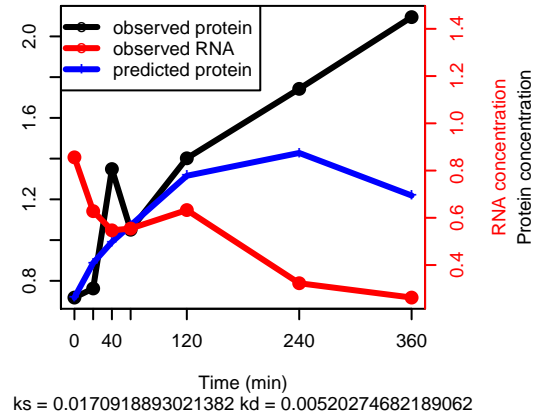

VAS1

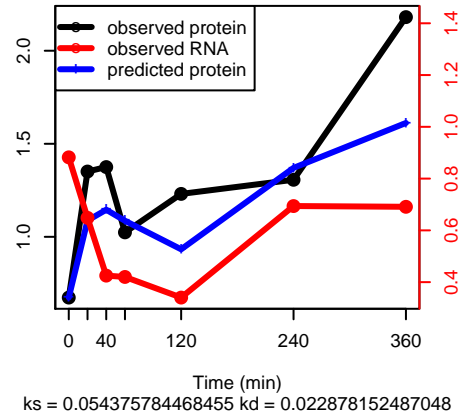

ZUO1

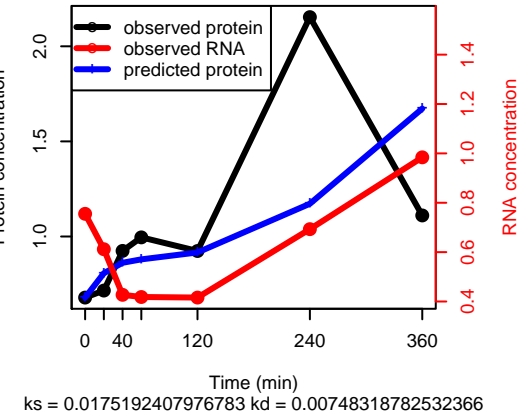

LYS1

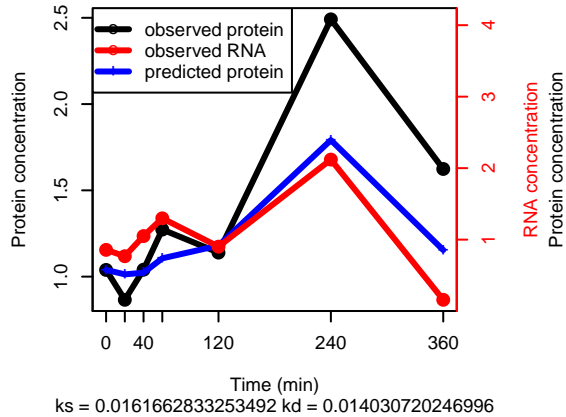

ACT1

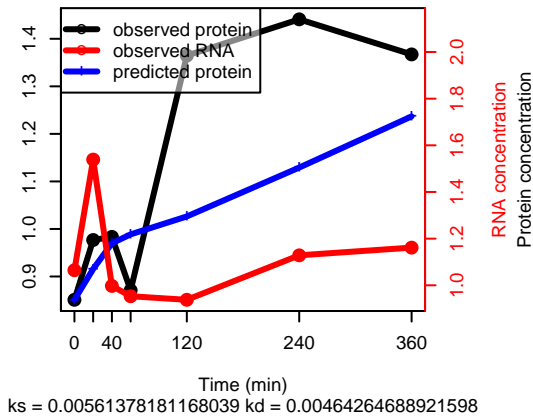

YCP4

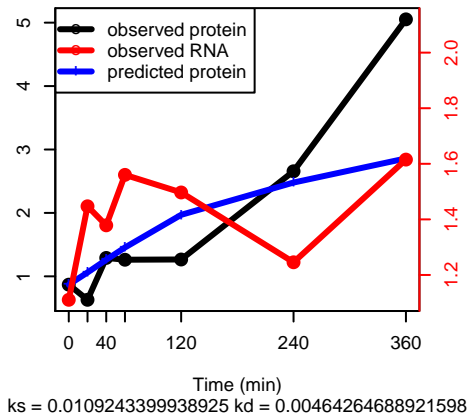

SSC1

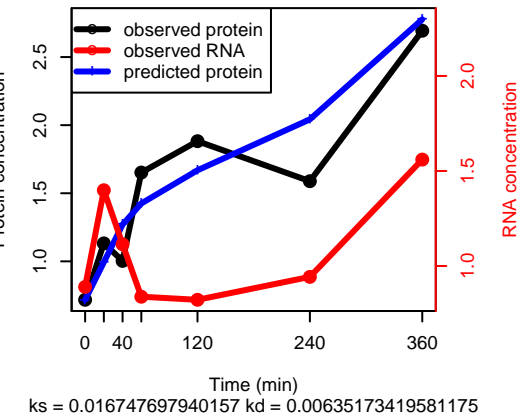

AHP1

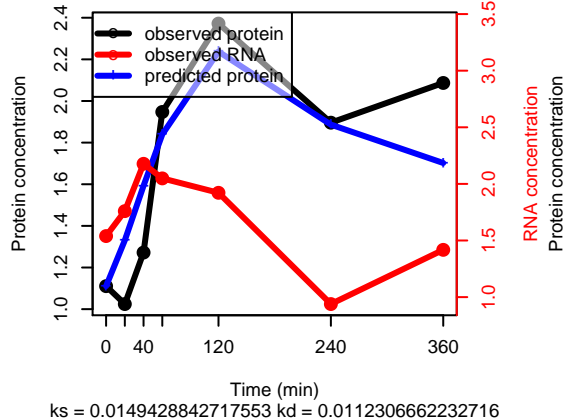

RPL13A

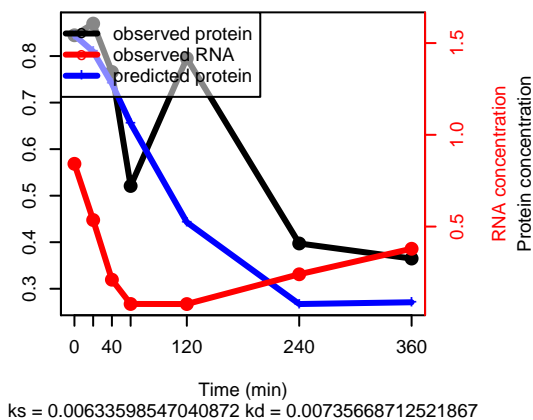

RPP2B

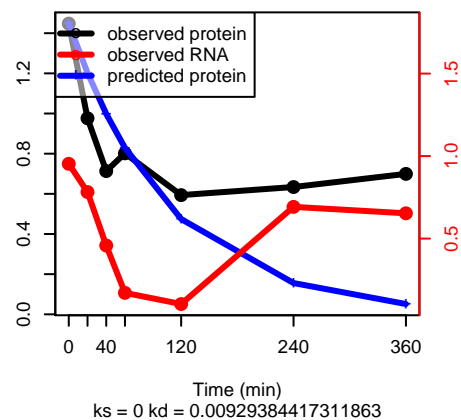

KAR2

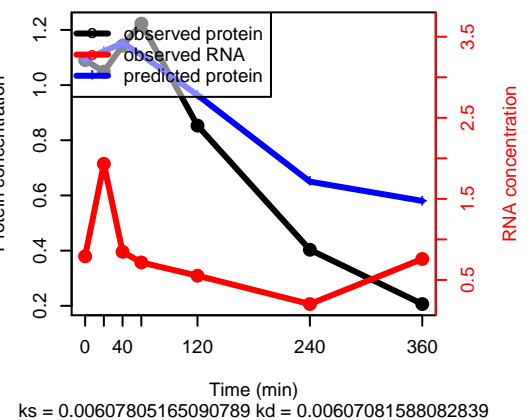

ENO2

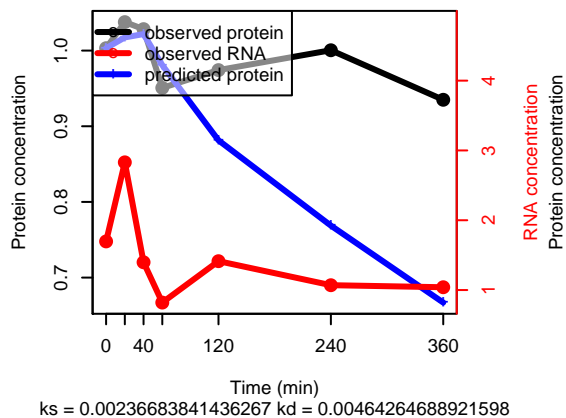

PFK1

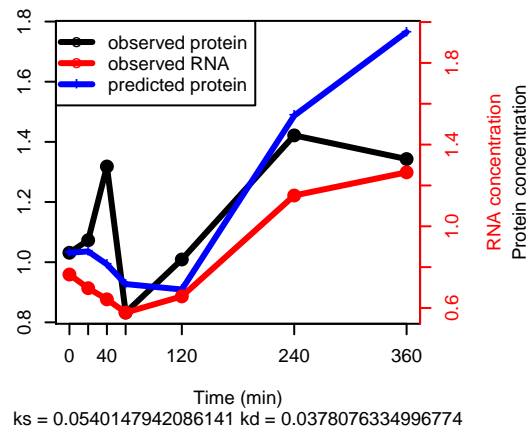

FUM1

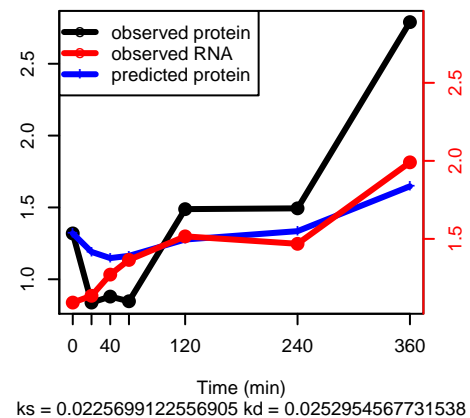

UGP1

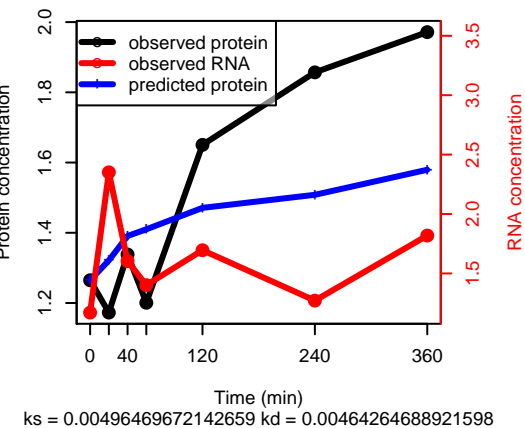

PMA1

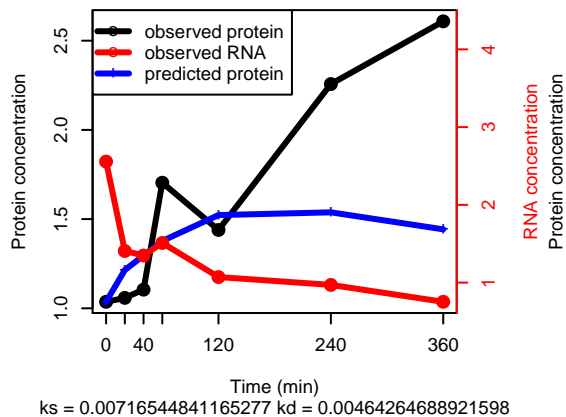

IDP1

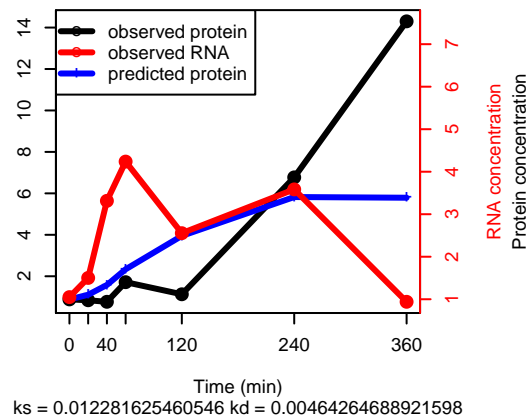

FBA1

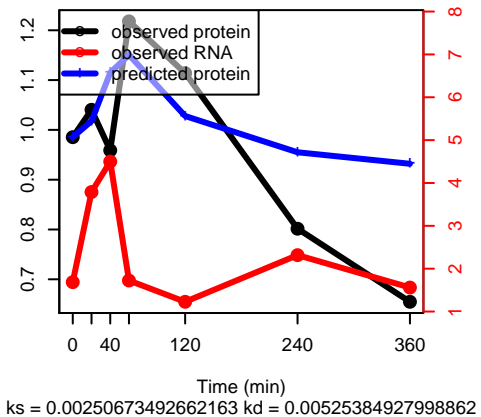

BAT2

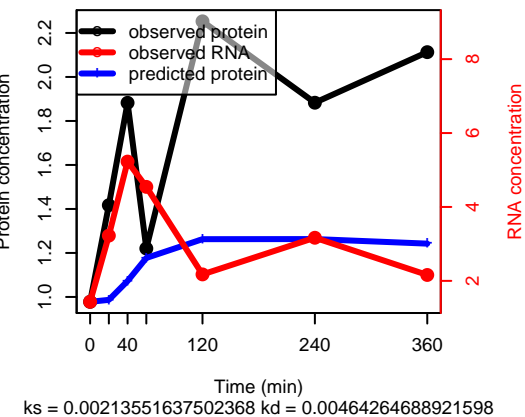

RPS19B

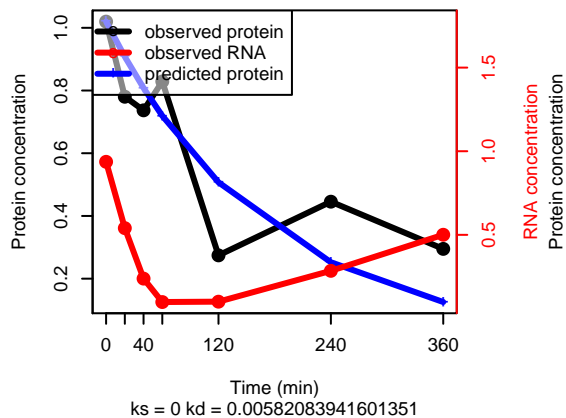

RPL22A

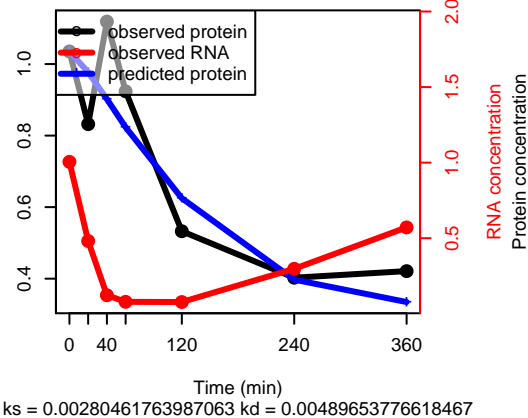

RPL30

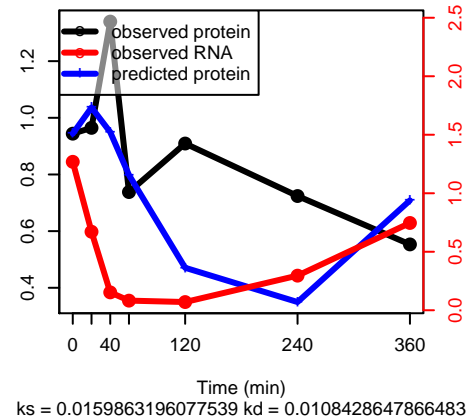

ILV5

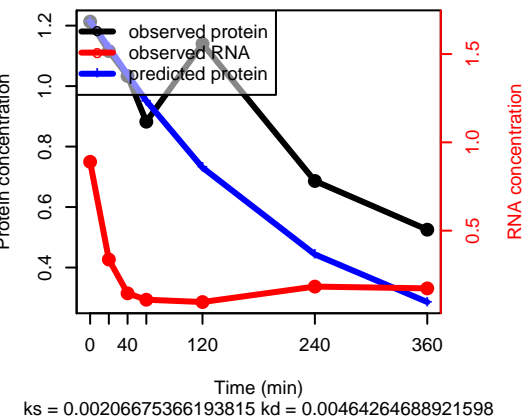

IMD2

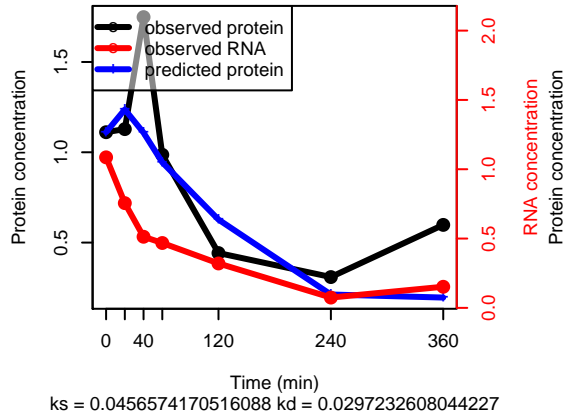

PFK2

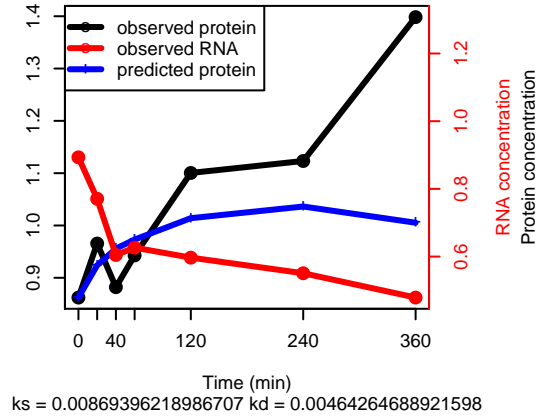

GND1

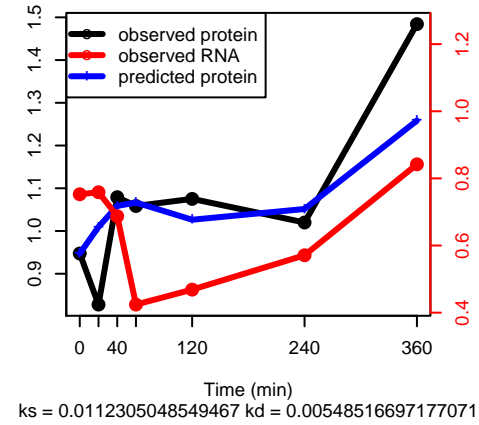

ADE13

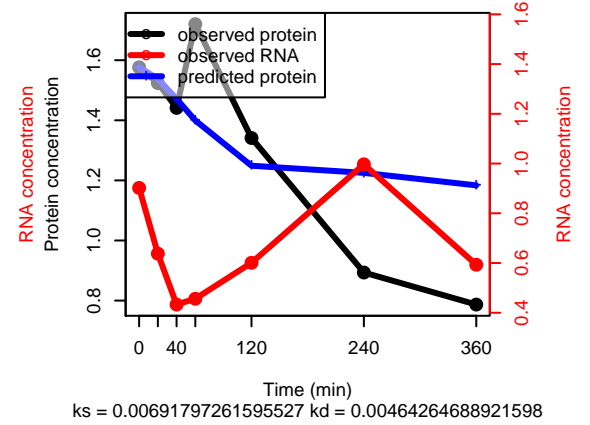

GLT1

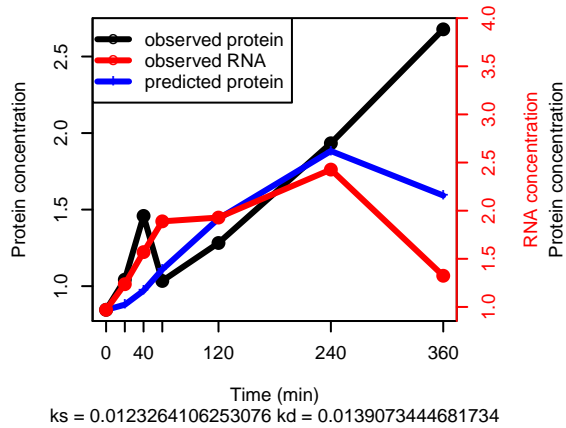

SGT2

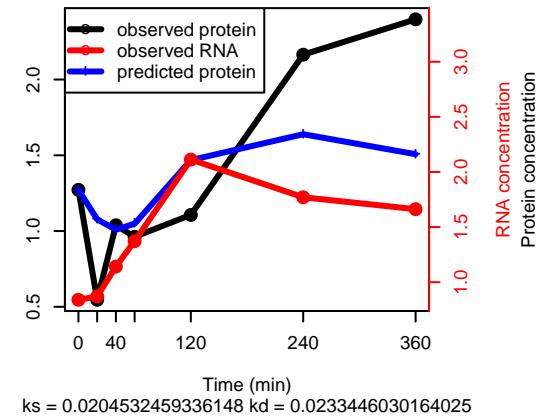

RPL14A

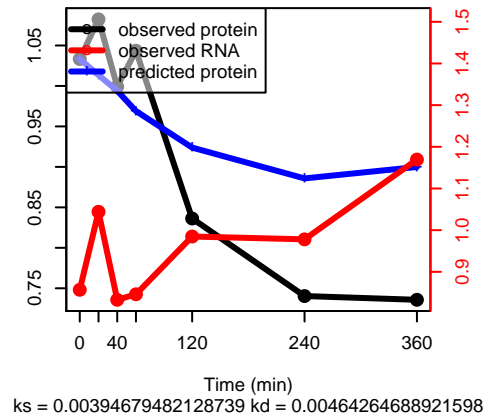

TY1B-ER1

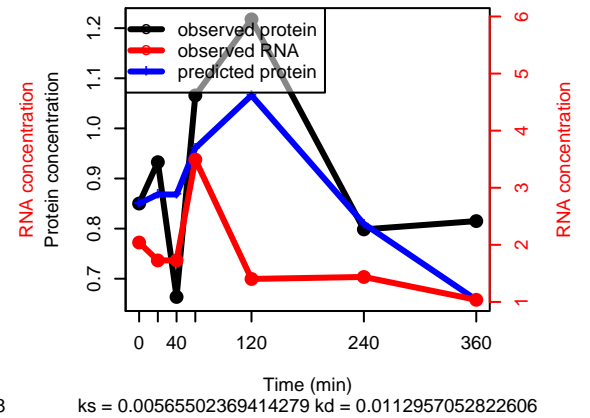

GLK1

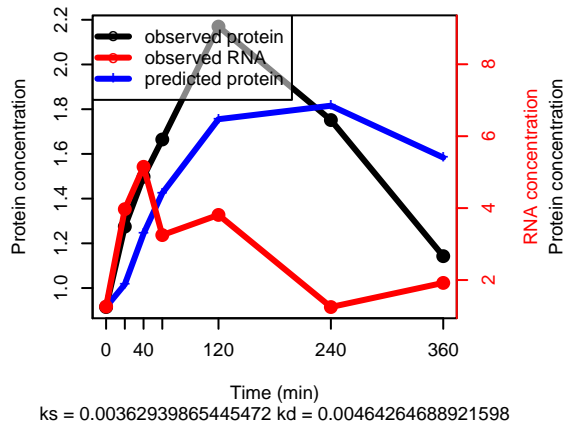

HSP104

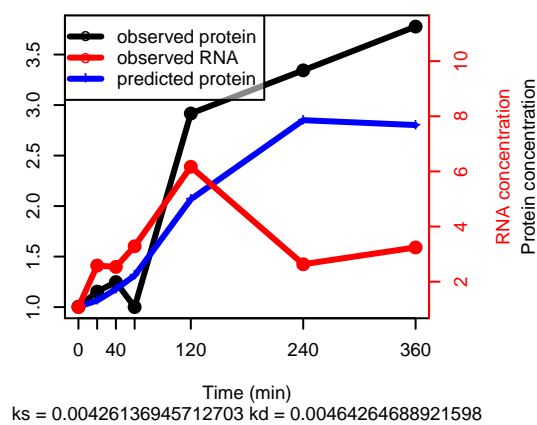

RPS14A

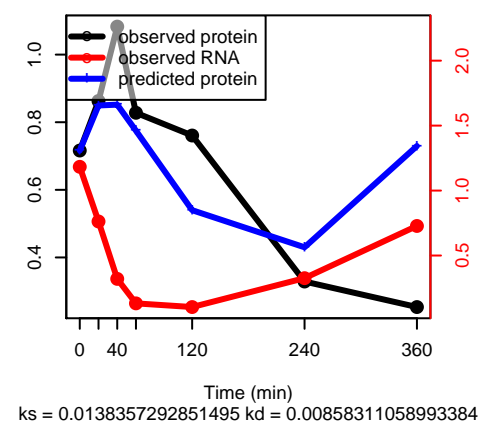

RPL11B

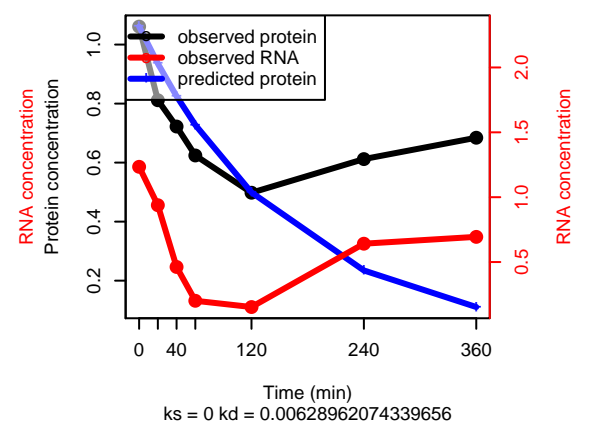

GLN4

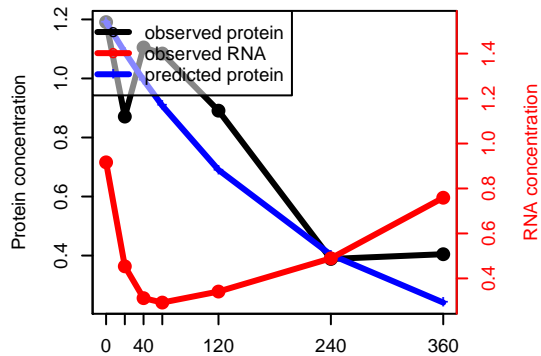

ks = 0.000184264360447901 kd = 0.00464264688921598

EGD1

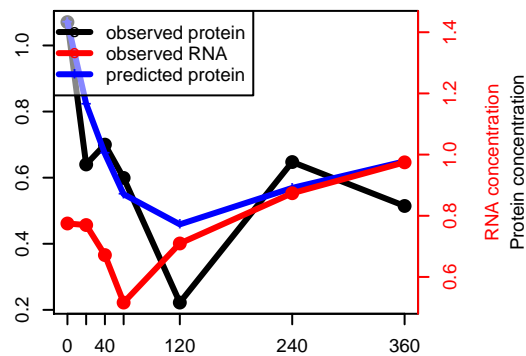

ks = 0.0210570124816477 kd = 0.0305725769657902

TCB3

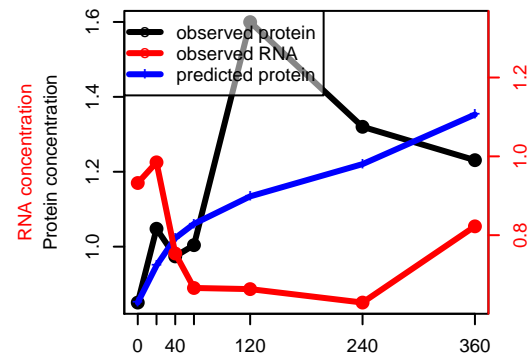

ks = 0.00950890556866828 kd = 0.00464264688921598

TUB2

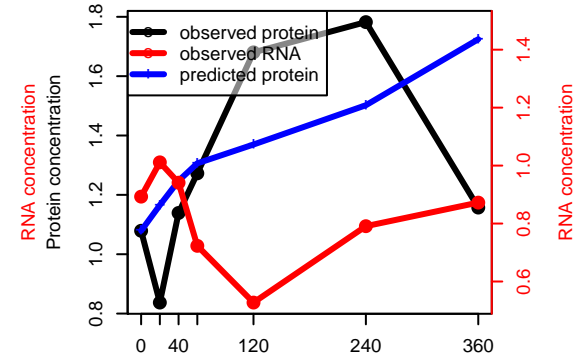

ks = 0.0109448831504569 kd = 0.00544979195447271

SSZ1

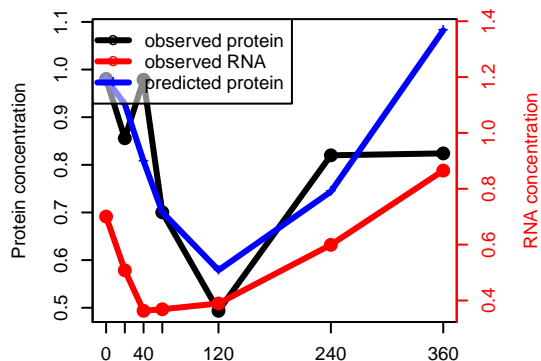

ks = 0.0322205068173553 kd = 0.0230292787898547

PYC2

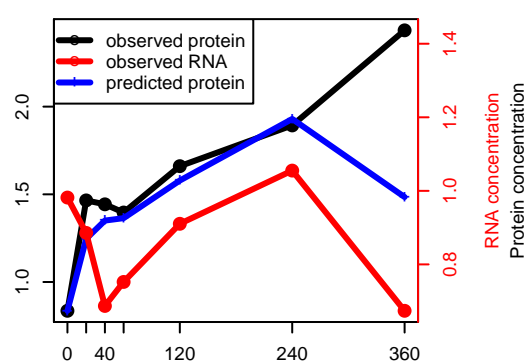

ks = 0.055249514054554 kd = 0.0290897736707182

SPT6

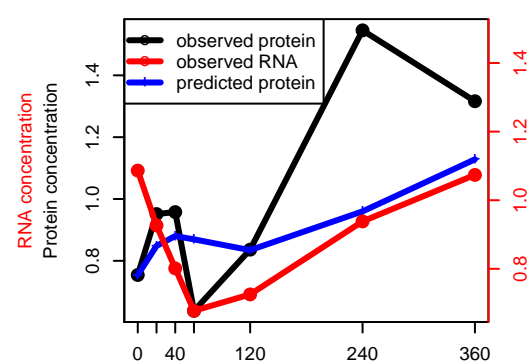

ks = 0.0157537313123944 kd = 0.013855021057256

TSA1

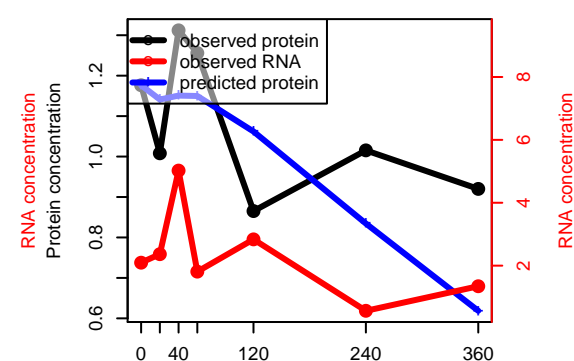

ks = 0.001563537702778 kd = 0.00464264688921598

RPL20B

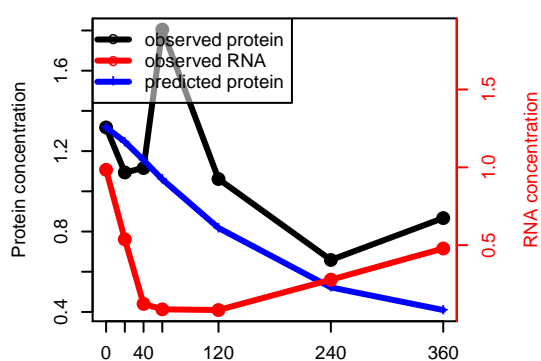

ks = 0.00314135729306333 kd = 0.00464264688921598

HIS1

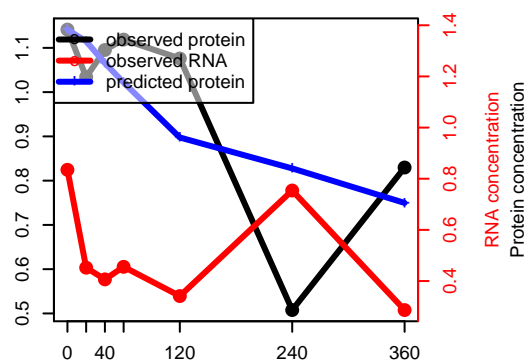

ks = 0.0061149986931715 kd = 0.00464264688921598

OLA1

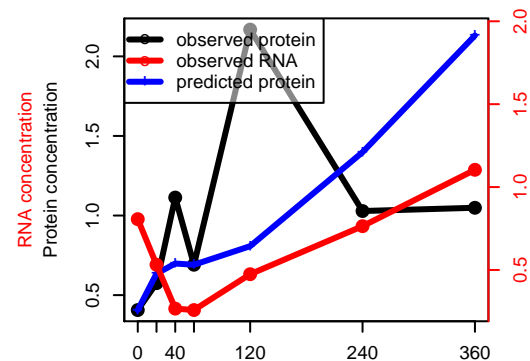

ks = 0.025242699812508 kd = 0.0102622884462975

TIF4631

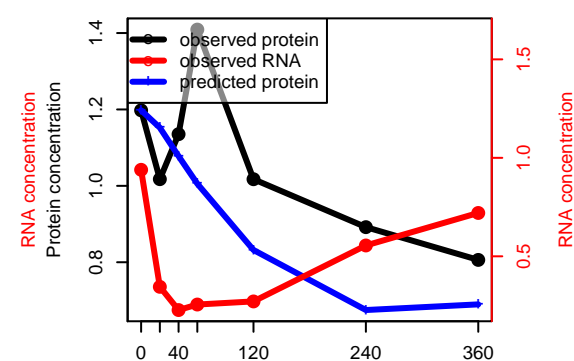

ks = 0.00508829023581106 kd = 0.00464264688921598



GCD11

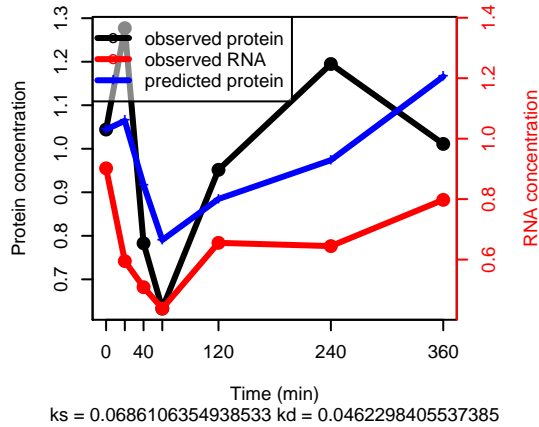

KAP123

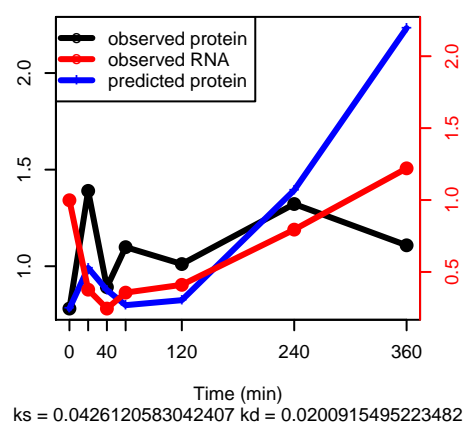

HIS7

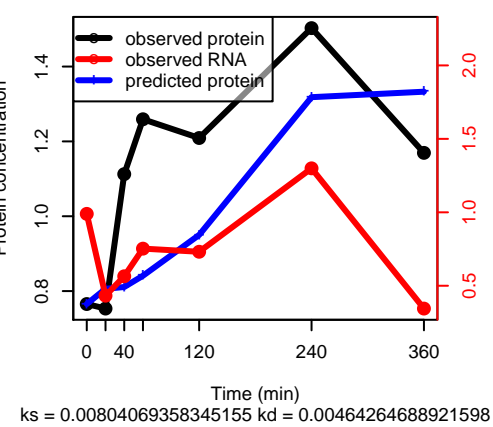

SEC23

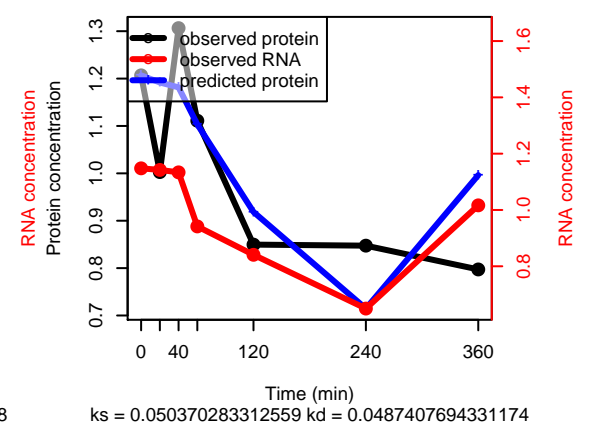

VMA13

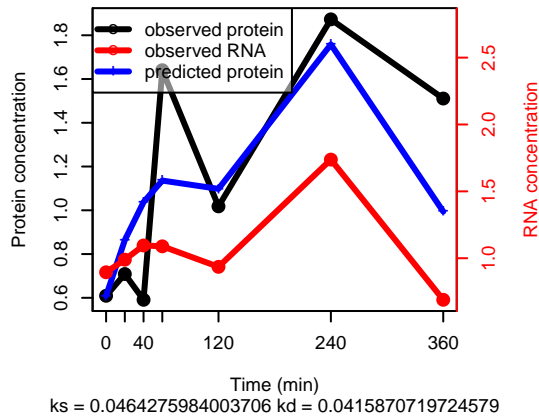

SPT16

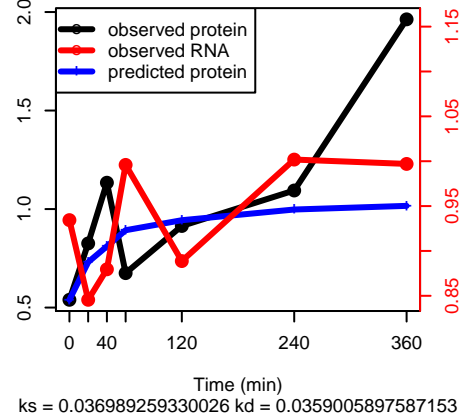

RPB2

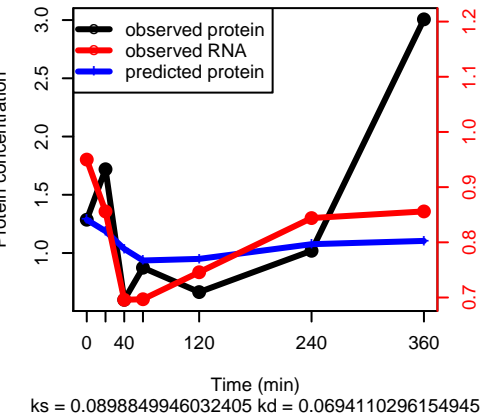

BAT1

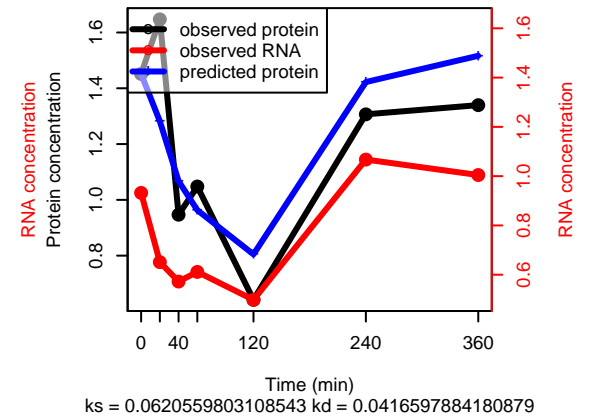

PDC6

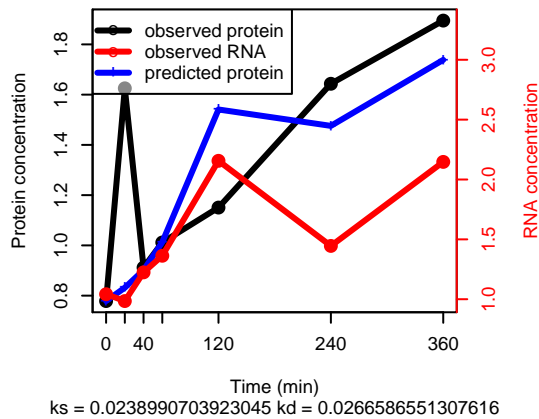

ATP1

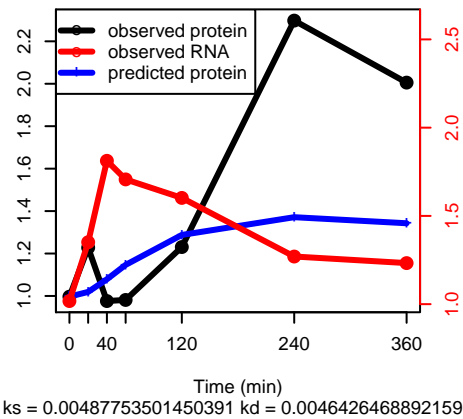

GSC2

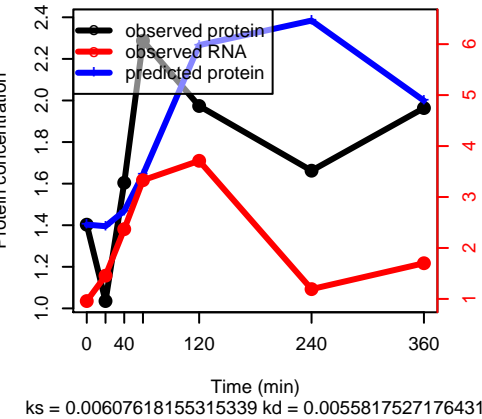

RNR4

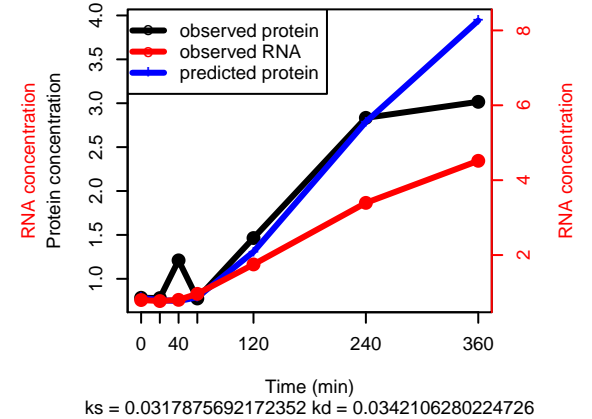



RPS4B

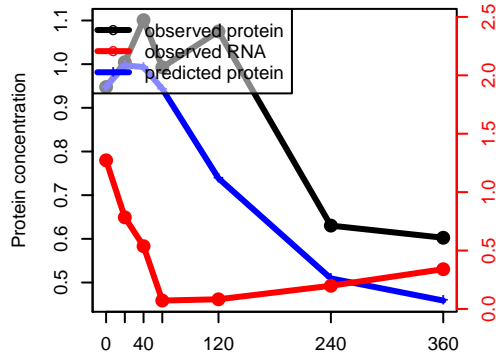

ks = 0.00682232649141638 kd = 0.00464264688921598

SSB2

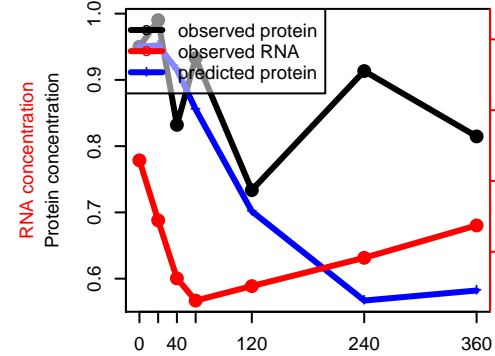

ks = 0.00480977283907388 kd = 0.00464264688921598

BMH1

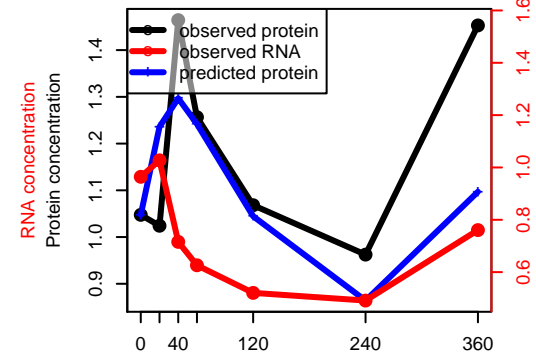

ks = 0.0302831385685401 kd = 0.0181462291396666

HOM3

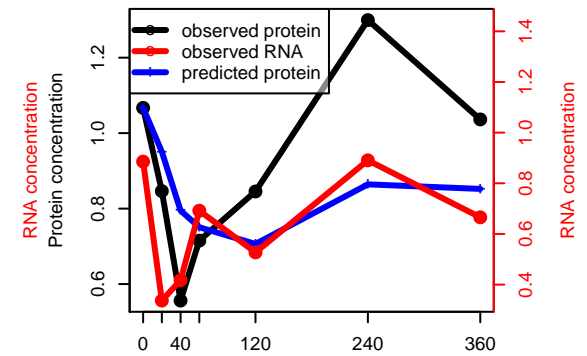

ks = 0.0207684926797409 kd = 0.0180461652038329

GAS1

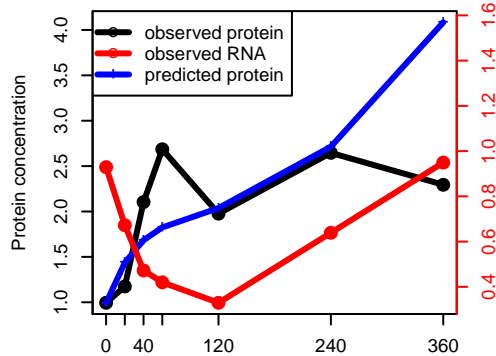

ks = 0.0349819802177289 kd = 0.00480824229967443

TRP2

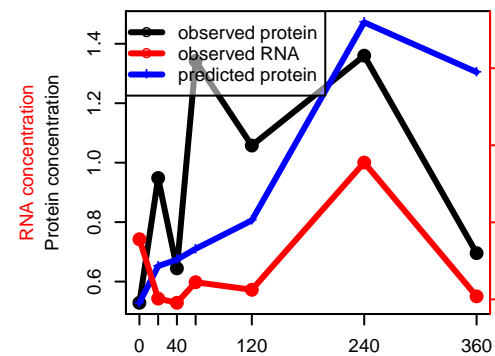

ks = 0.0205568331384497 kd = 0.0134834068443038

VMA1

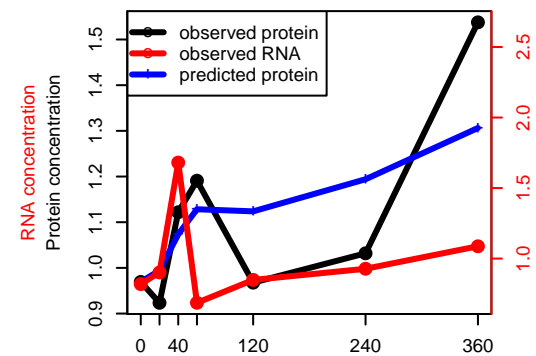

ks = 0.00682787304542619 kd = 0.00470715307387563

CHC1

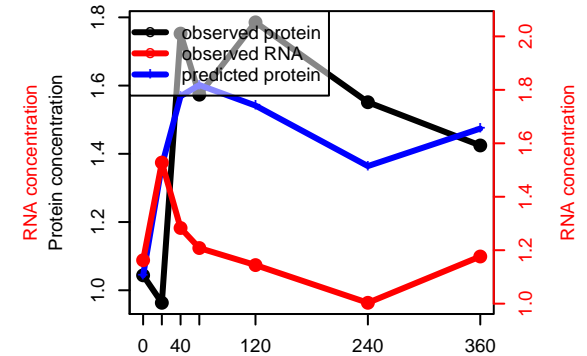

ks = 0.0364357545251526 kd = 0.0274838161081051

MCK1

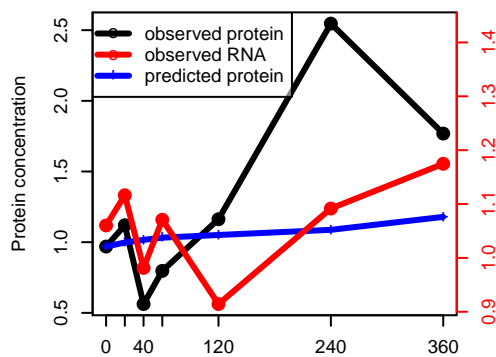

ks = 0.00670190828774684 kd = 0.00601161322182432

HEF3

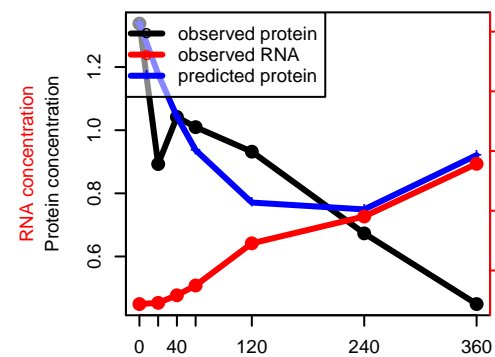

ks = 0.00163549659926778 kd = 0.00759931045448962

SSA3

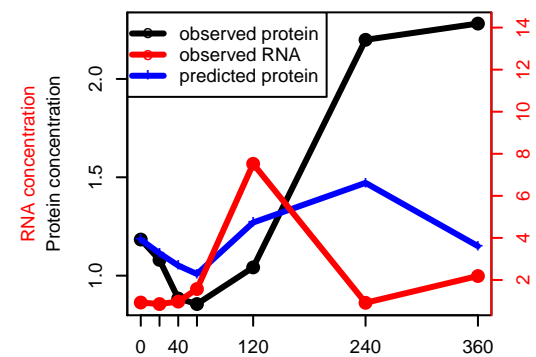

ks = 0.00206314425862278 kd = 0.00464264688921598

RPS11B

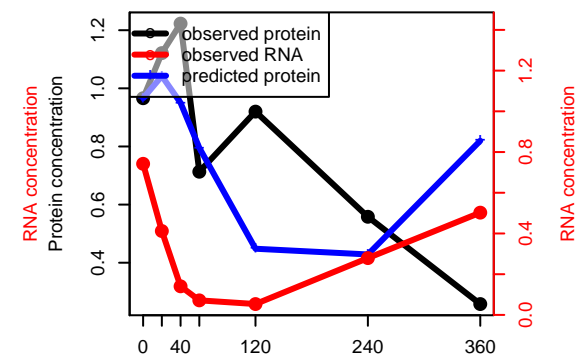

ks = 0.027827588207364 kd = 0.0120327570458009

RPL2A

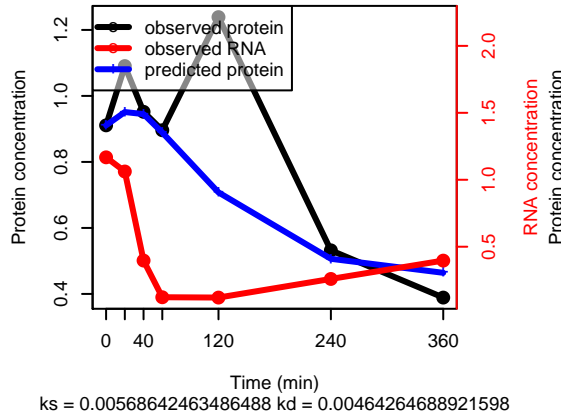

RPS0B

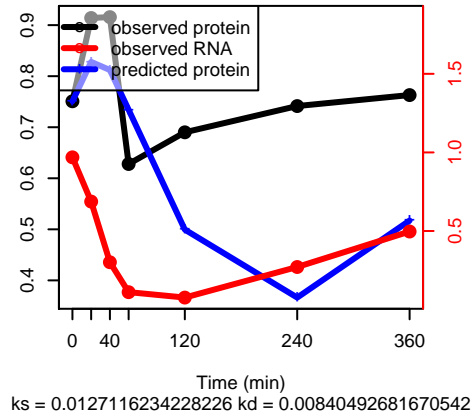

RPS2

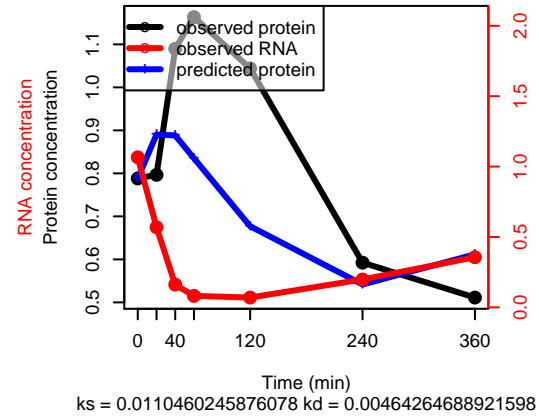

RPS15

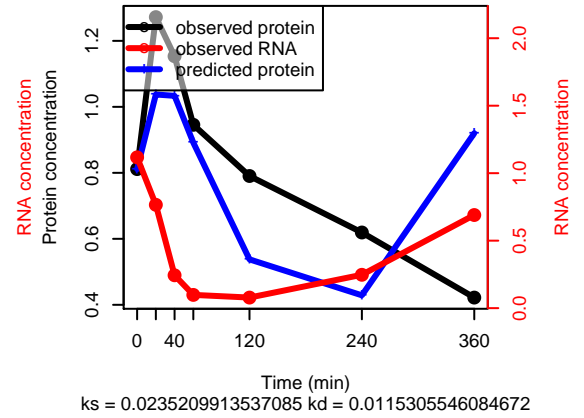

RPS1B

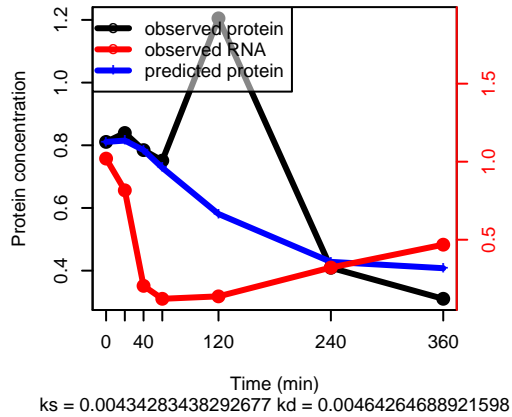

ARB1

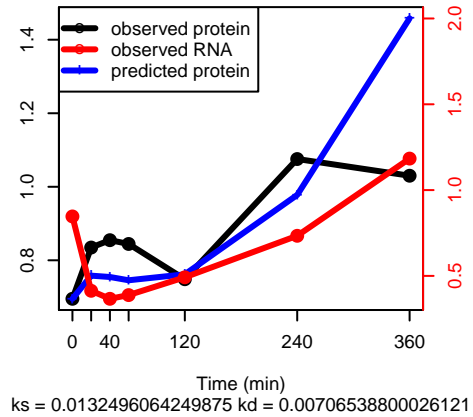

FKS1

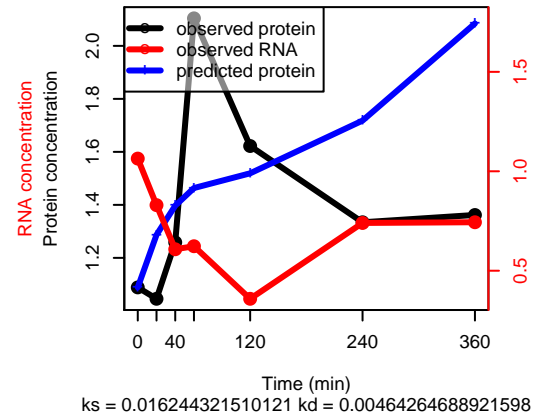

TY1B-BR

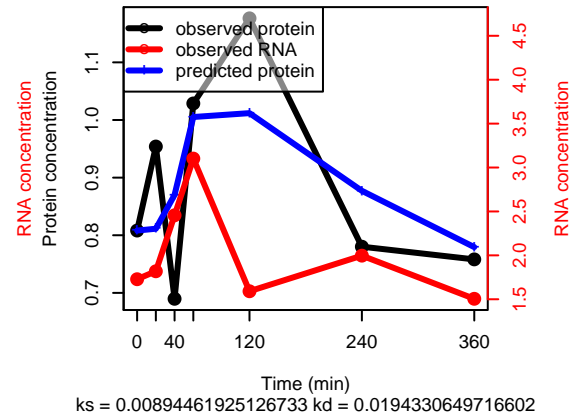

SSA1

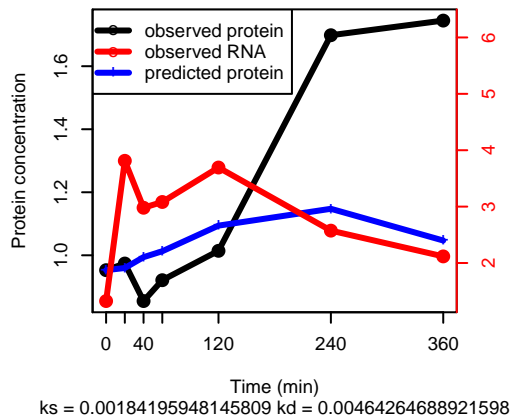

HSC82

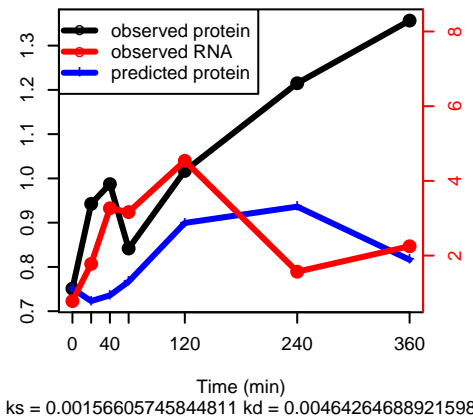

RPL4A

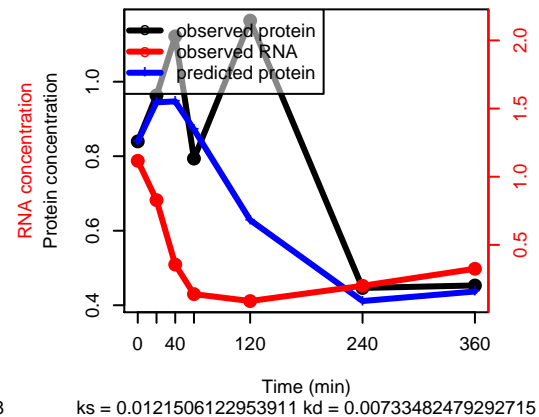

RPS3

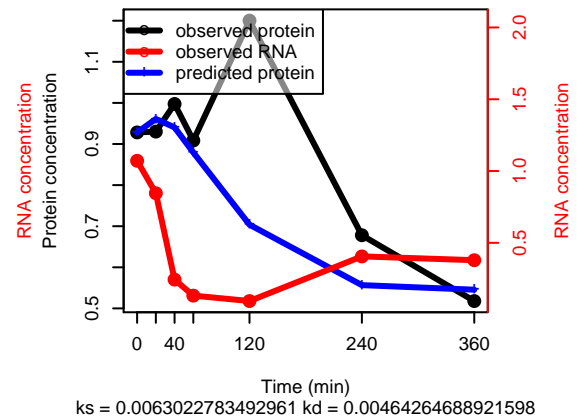

PDI1

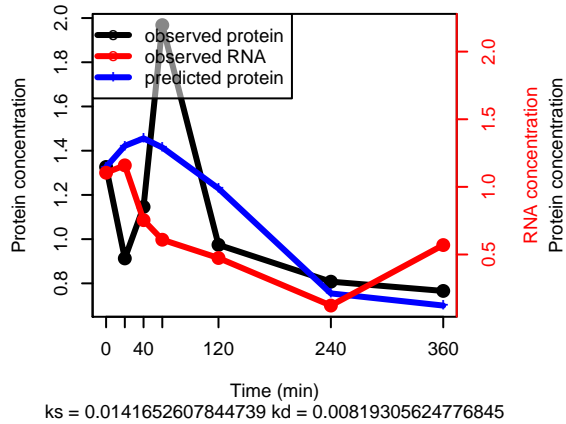

GCN1

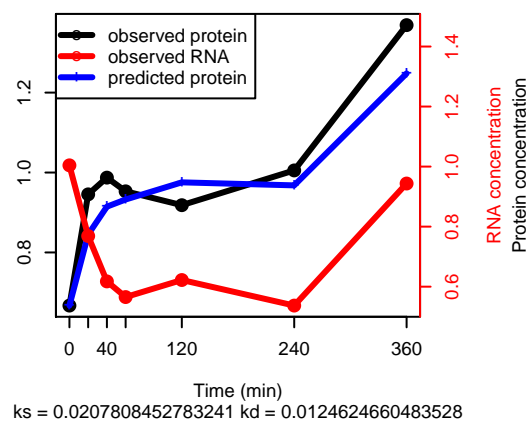

ALA1

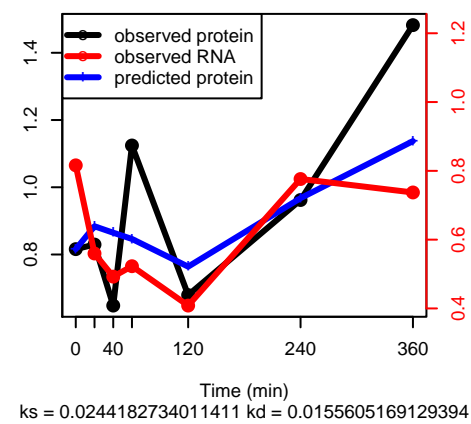

LYS2

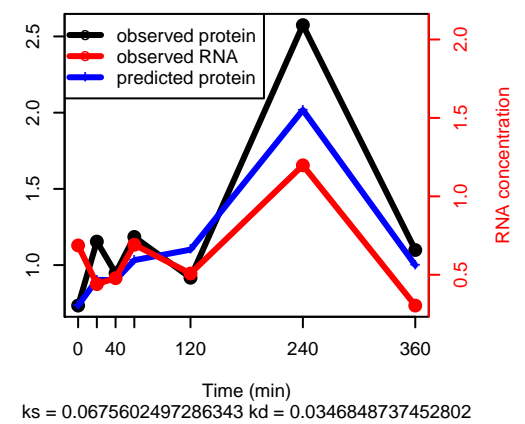

DUG1

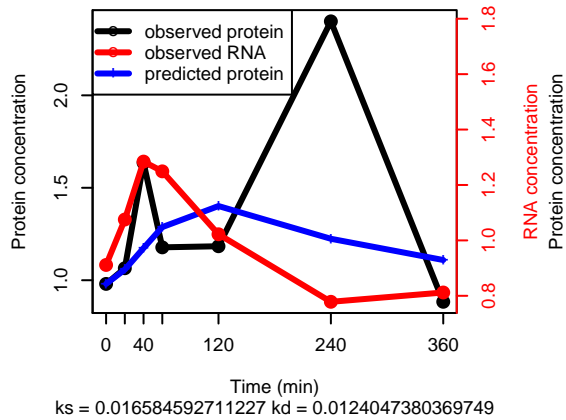

UBA1

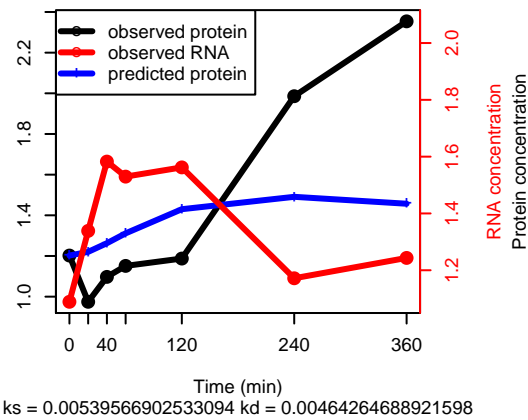

TY1B-DR3

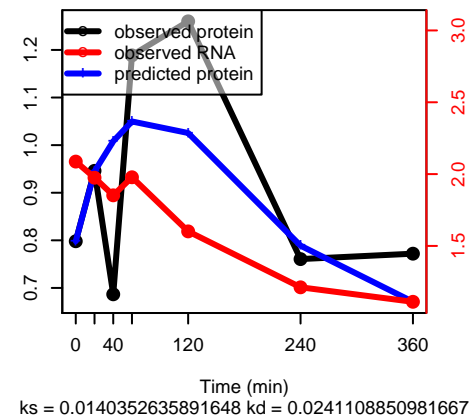

SIS1

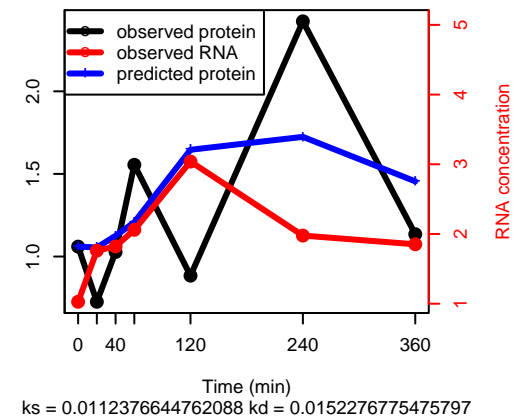

RPL9A

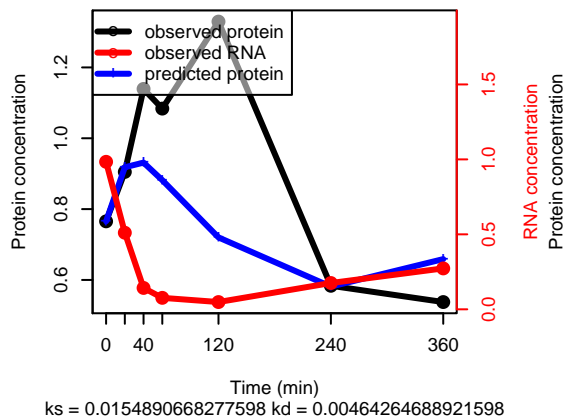

RPL5

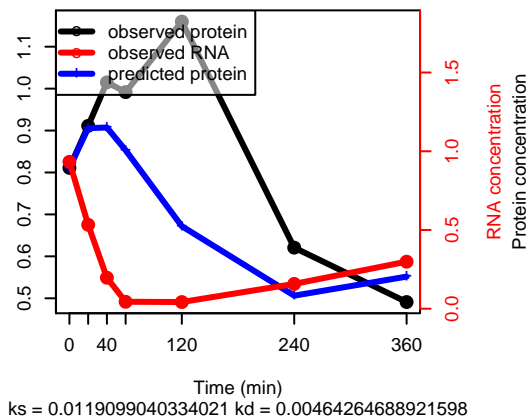

RPS22A

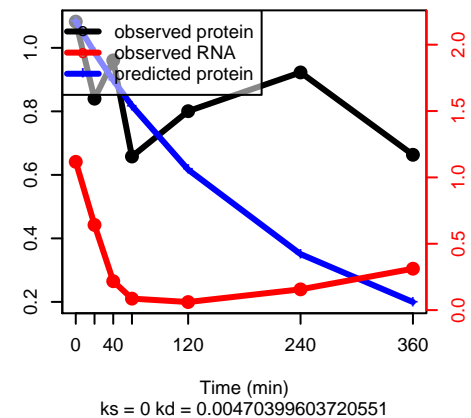

RPL27A

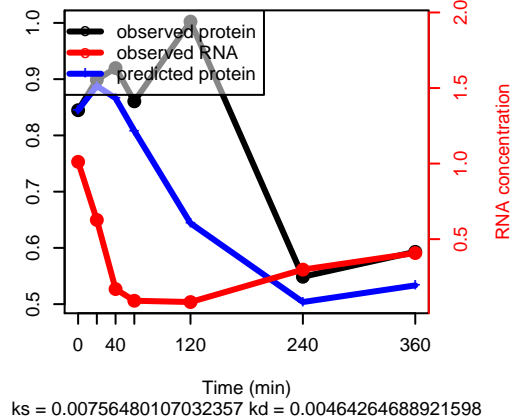

RPL8B

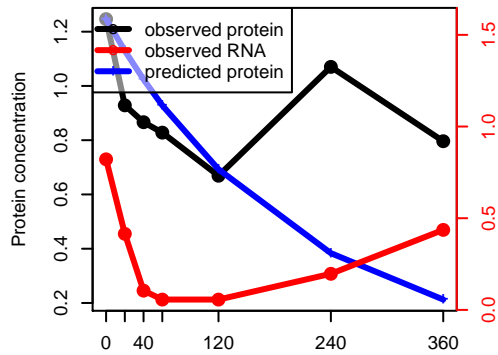

GUA1

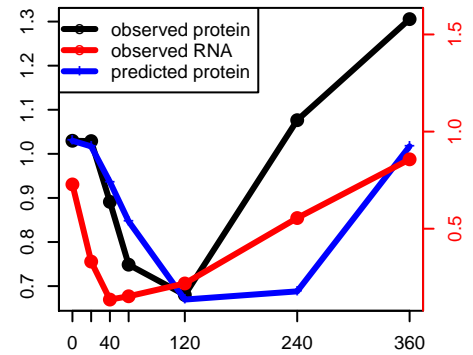

RPS1A

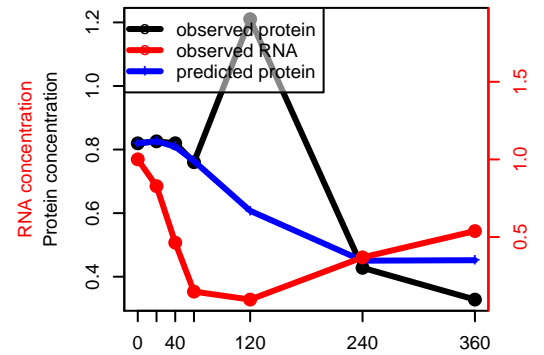

ARO2

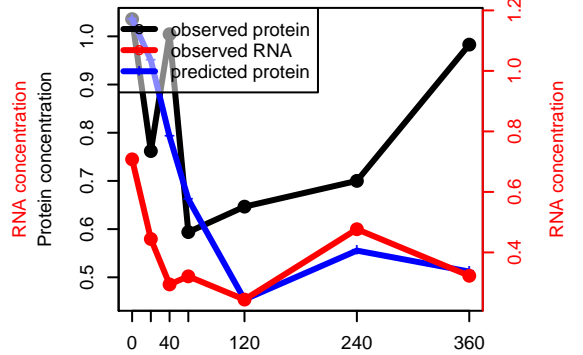

ARG4

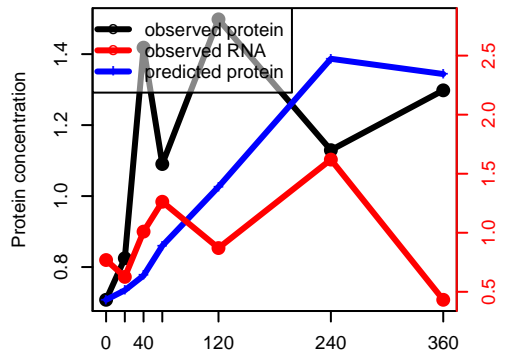

GLC7

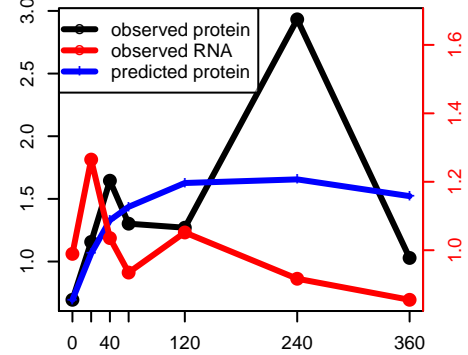

MDH3

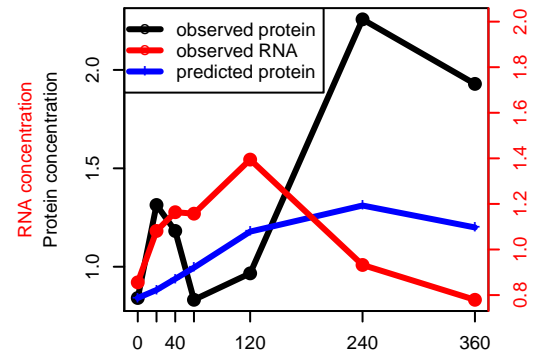

SSE1

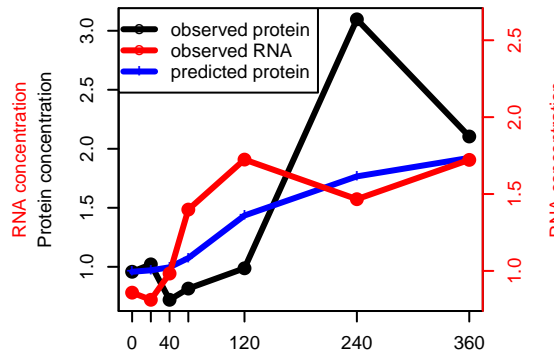

GDI1

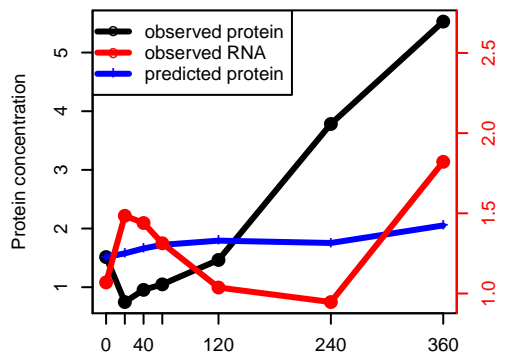

TY1B-ER2

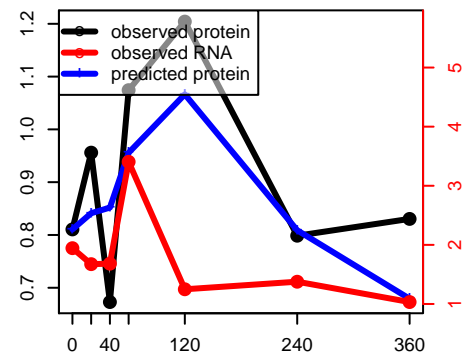

RPS9B

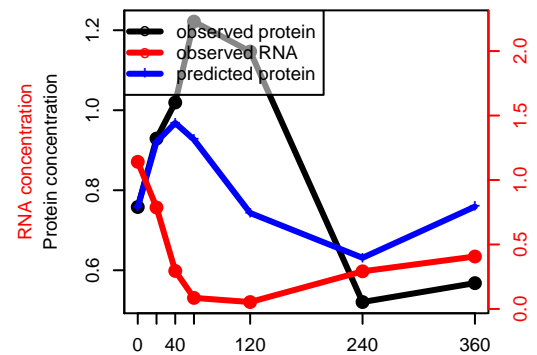

SSB1

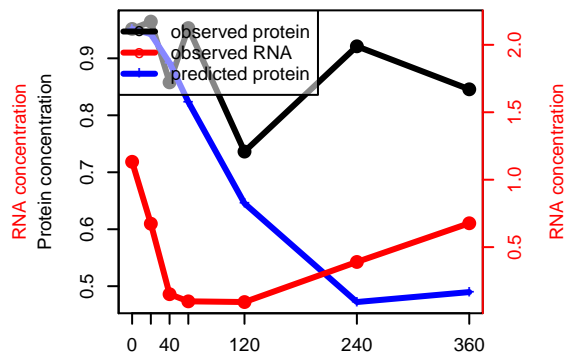

RPS0A

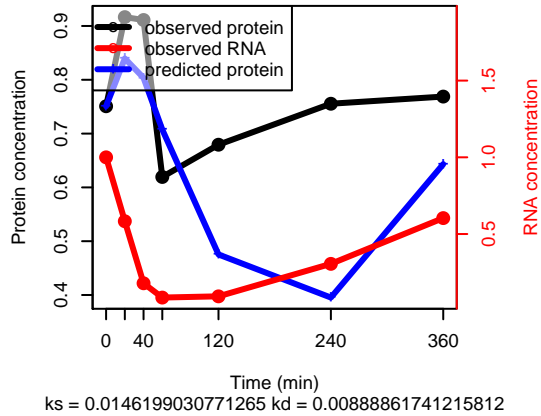

HOM2

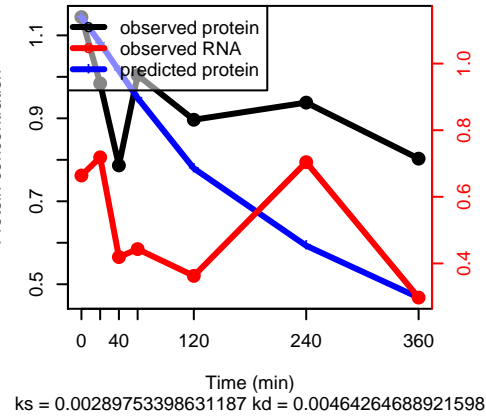

TKL1

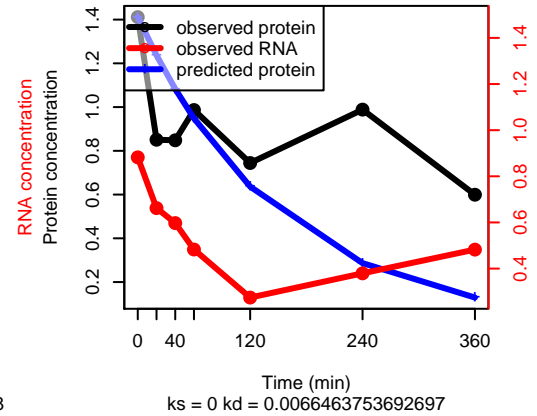

BFR1

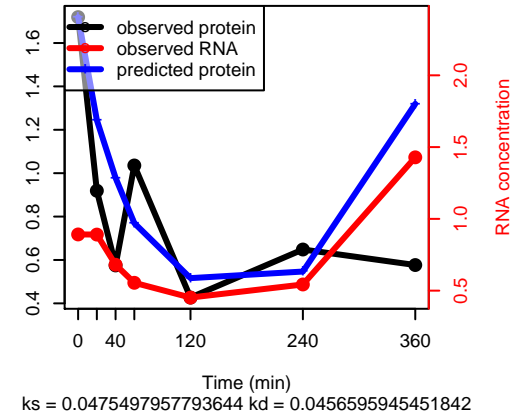

ADE16

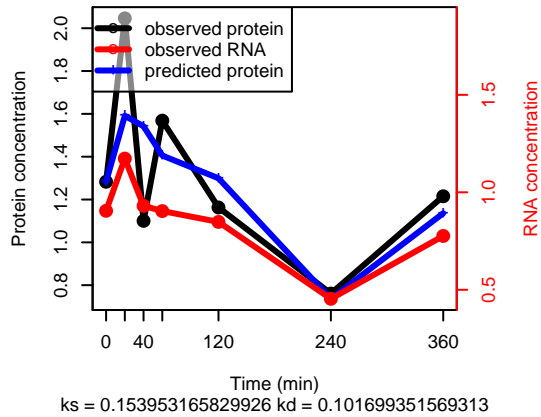

RPL10

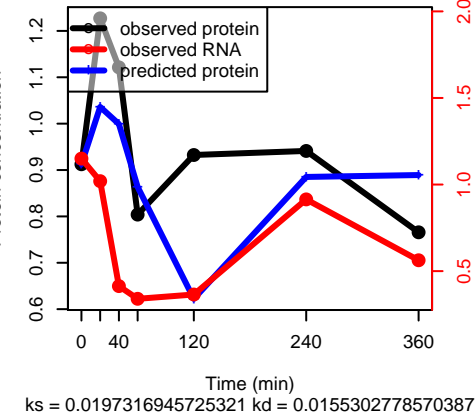

HTB2

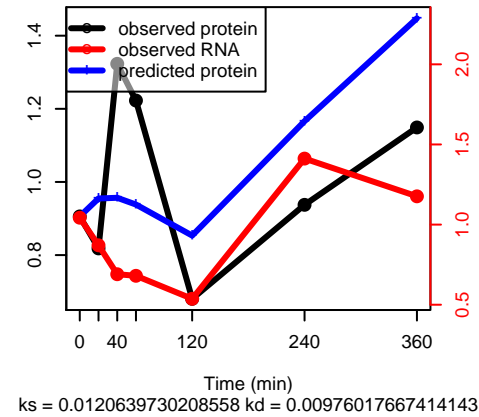

TY1B-DR5

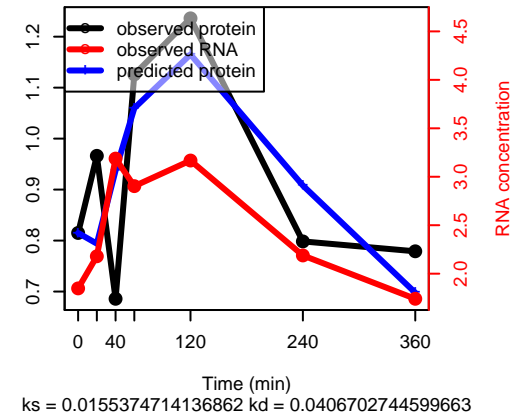

RNR2

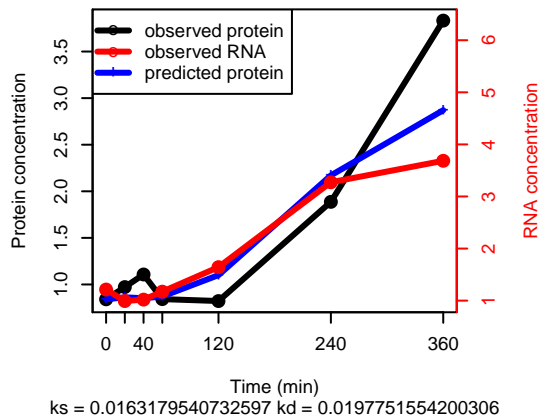

PMA2

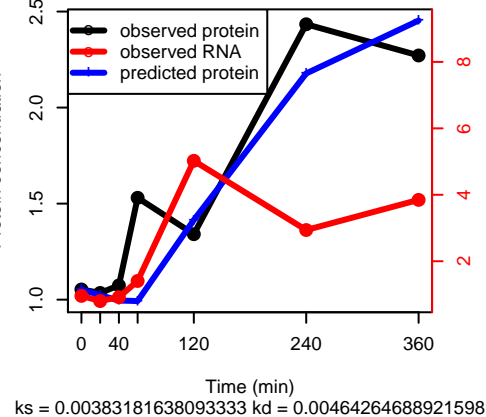

RPL3

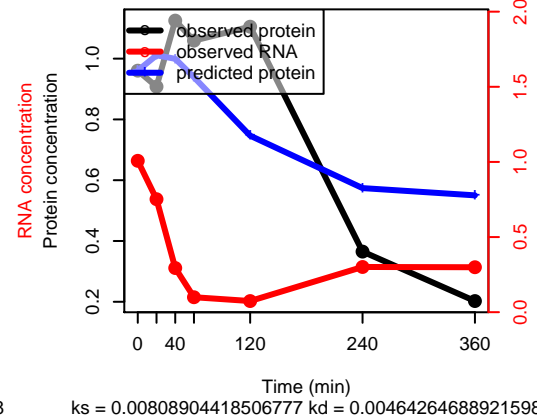

DED1

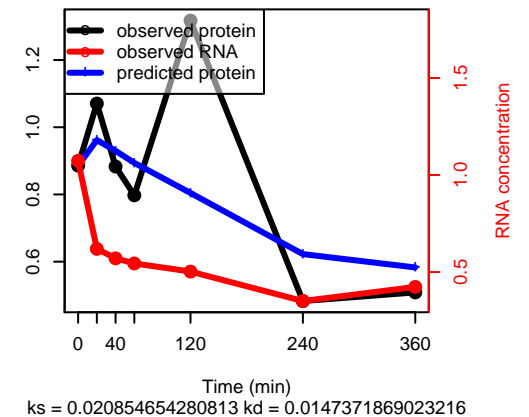

VMA2

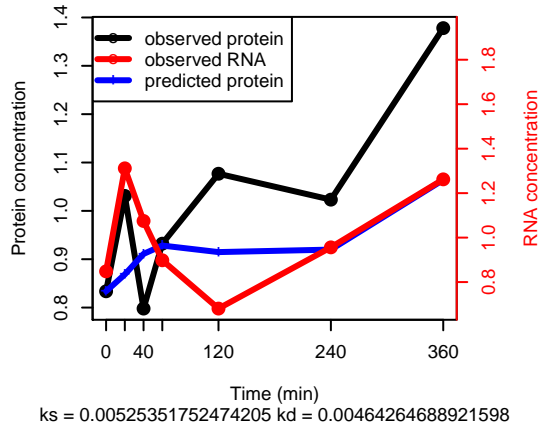

OYE2

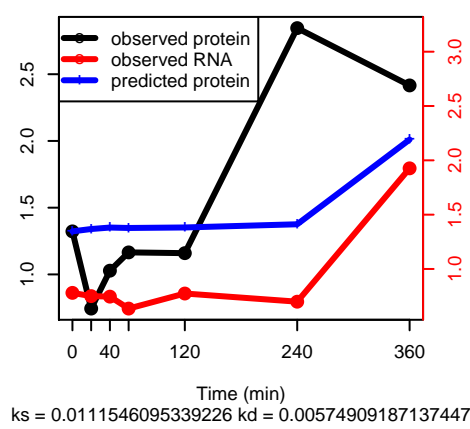

CDC33

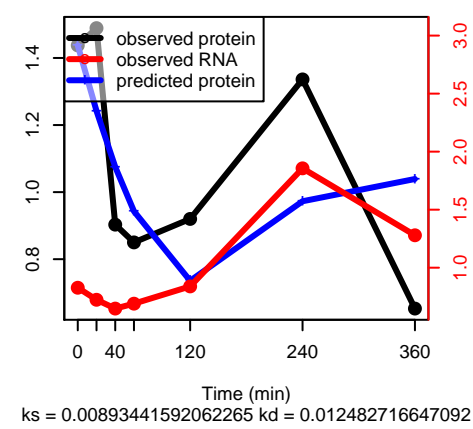

GDH1

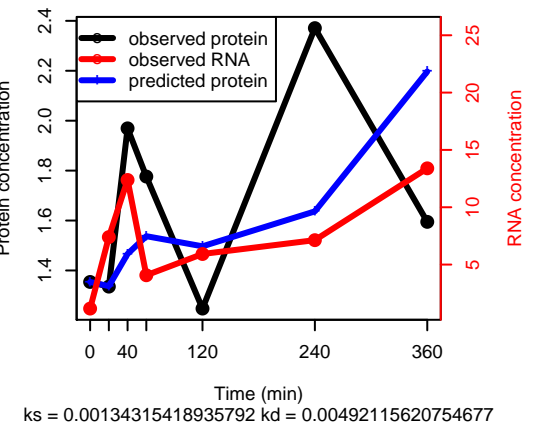

MDH1

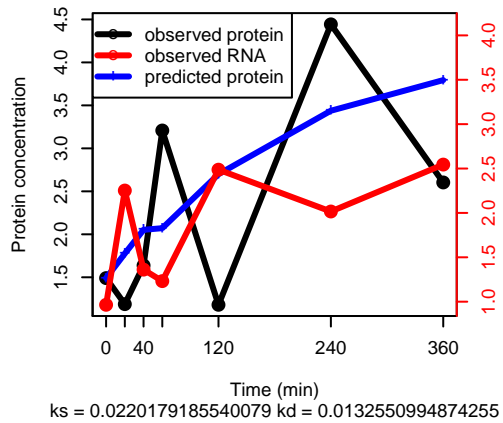

RPL8A

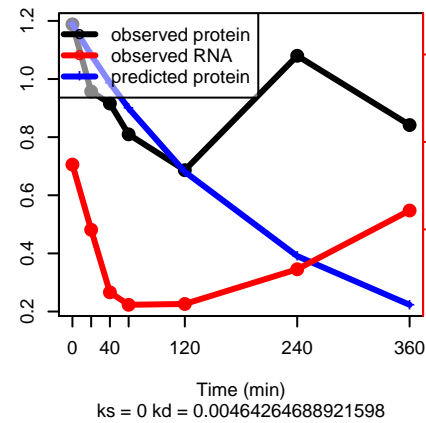

ACS2

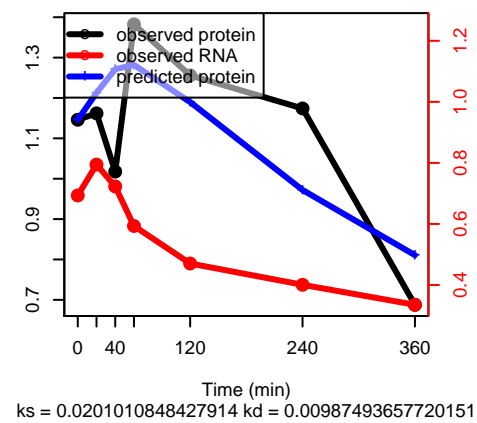

FAA1

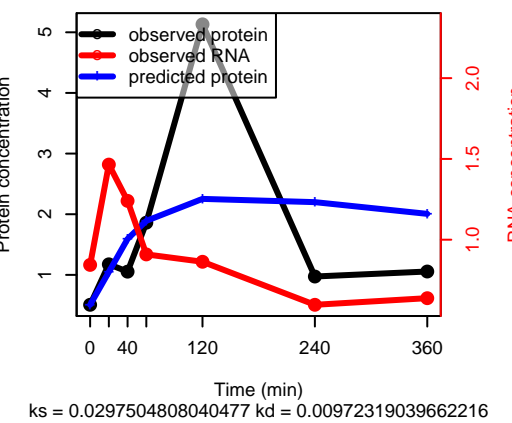

SUB2

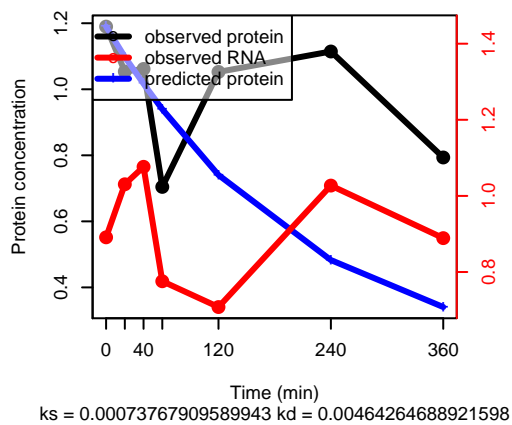

HXK2

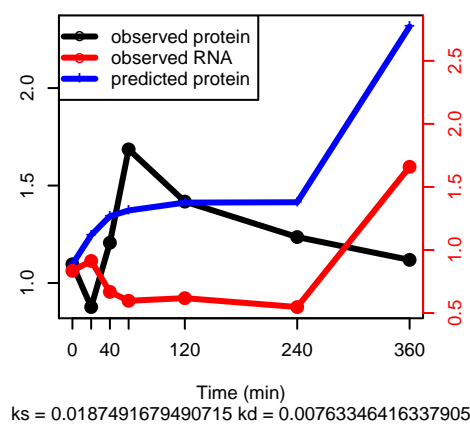

TY1A-DR3

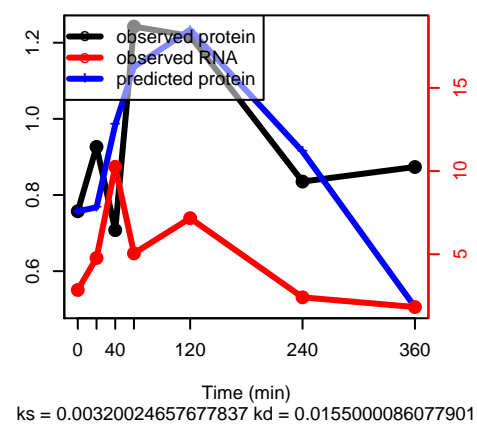

RPS17B

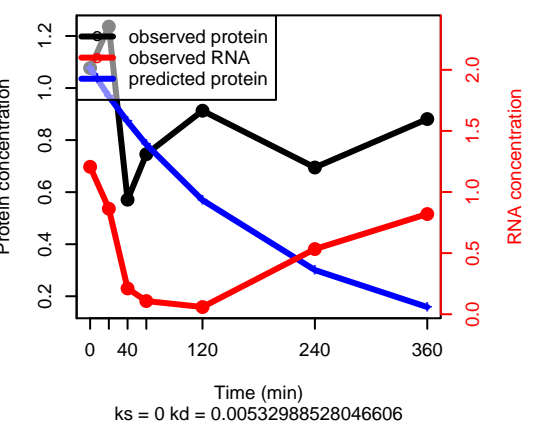

RPL4B

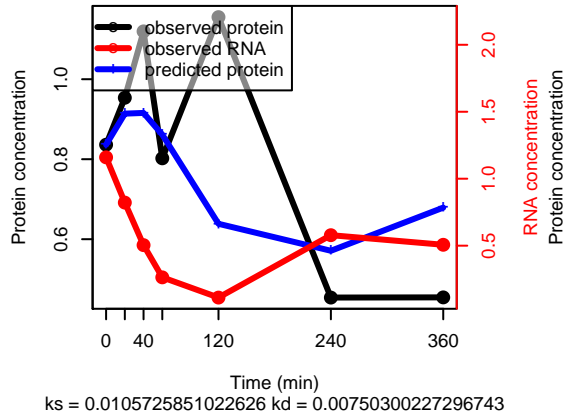

RPL15A

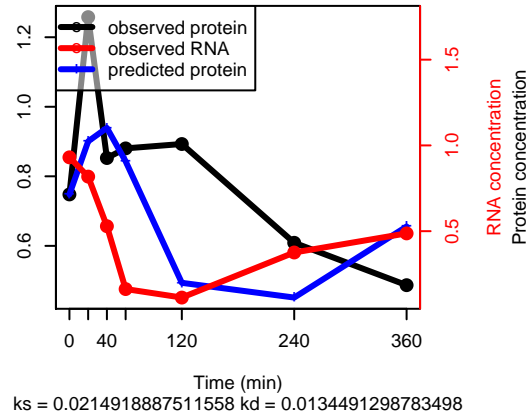

RPS18A

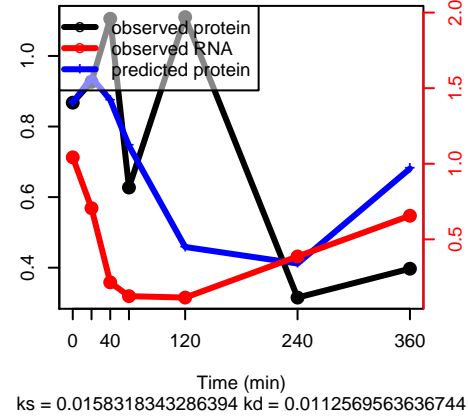

TRP5

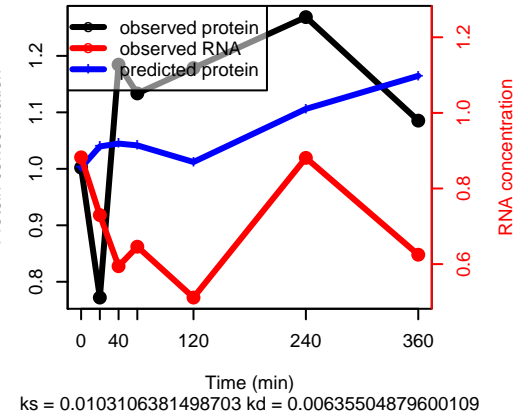

KAP95

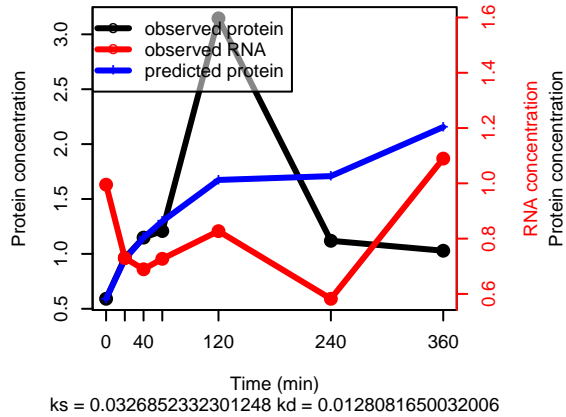

LYS21

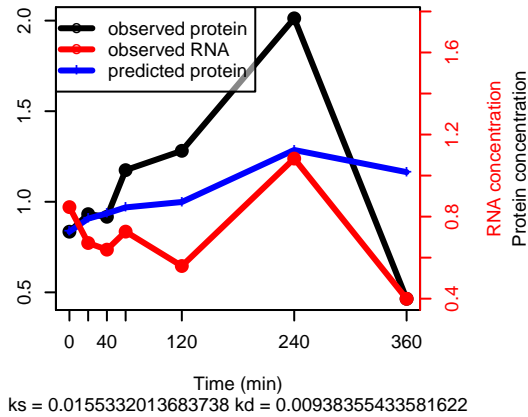

TUB1

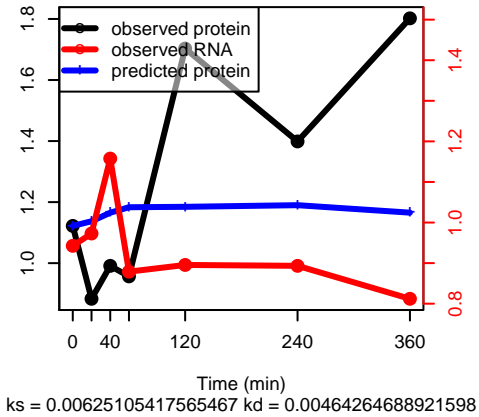

SEC21

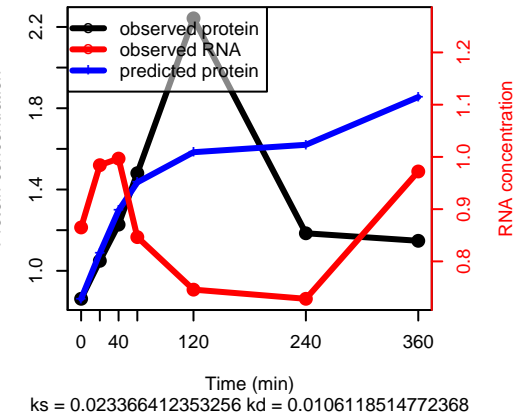

FAS2

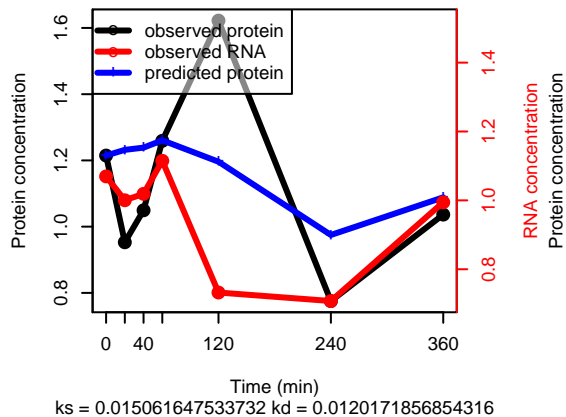

RPS6B

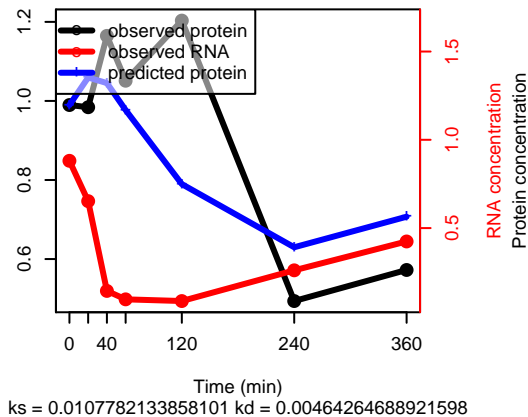

ADE12

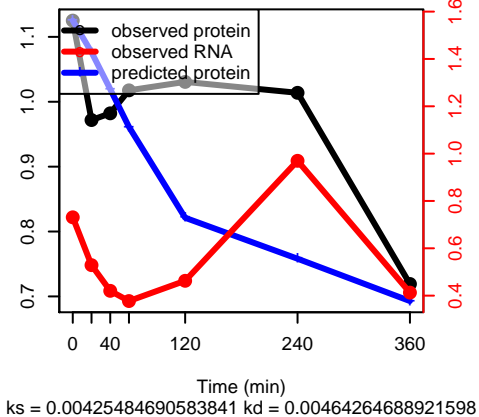

ENO1

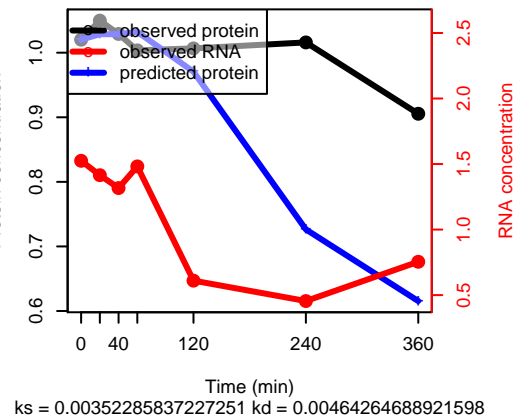



CLU1

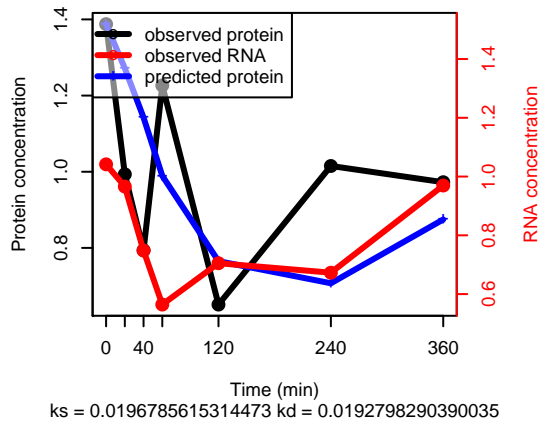

SEC24

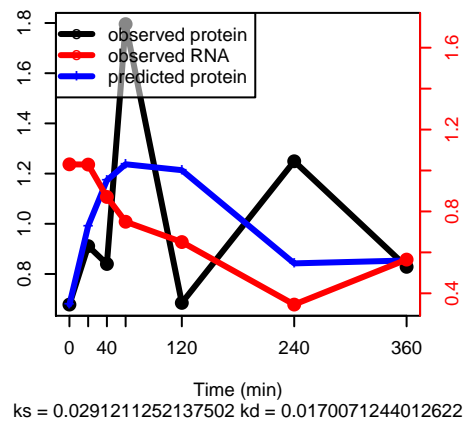

TEF2

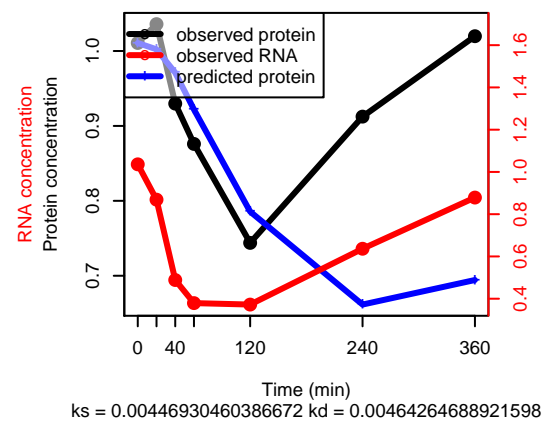

CYS4

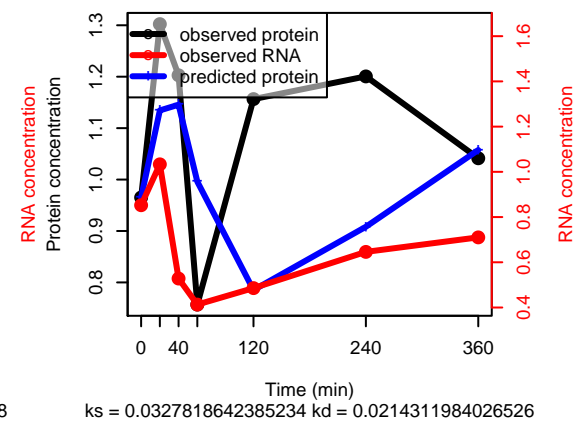

GCV2

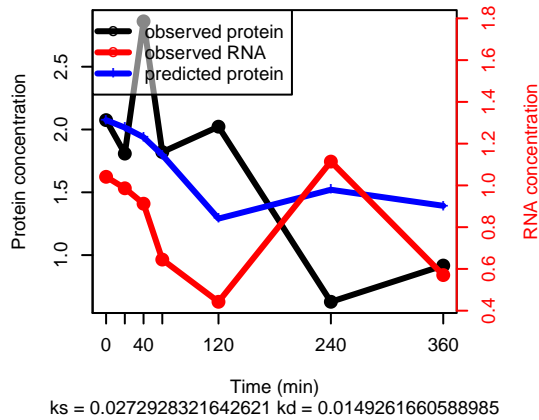

SAC6

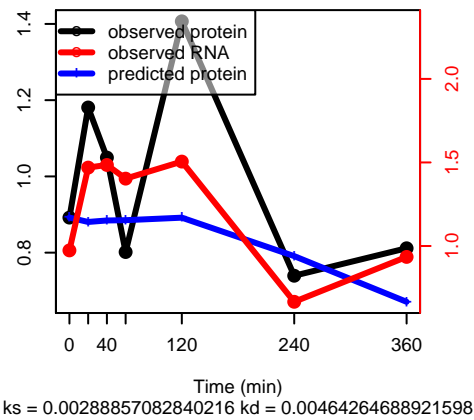

EGD2

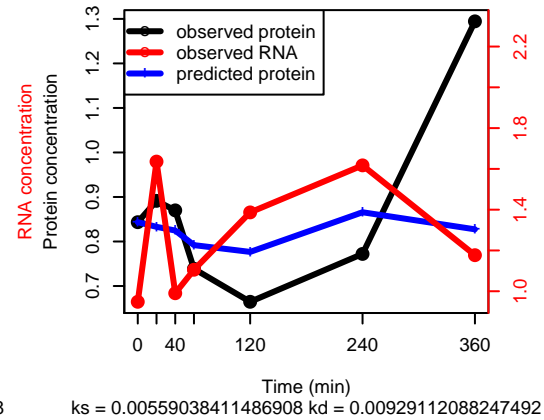

APE3

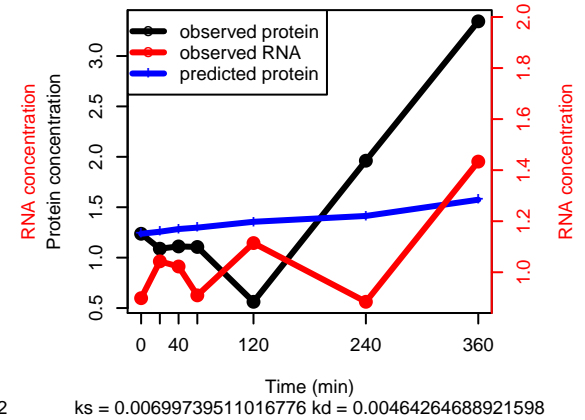

RPS12

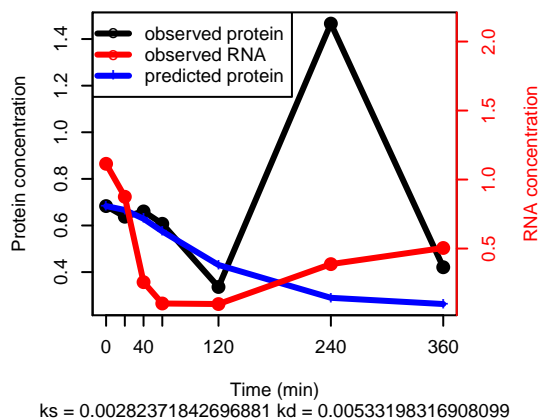

RPL31A

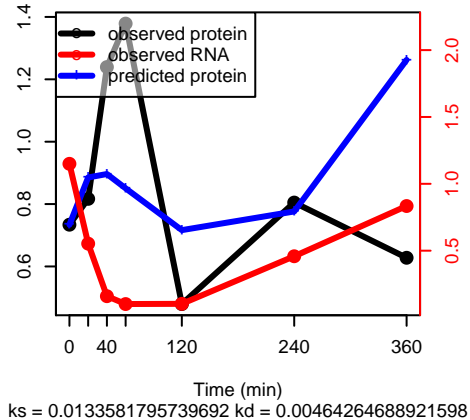

DPS1

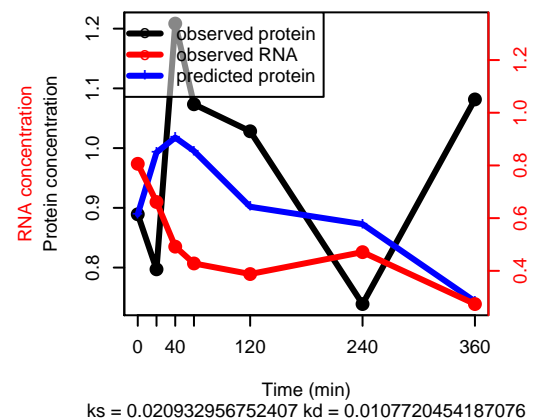

HIS4

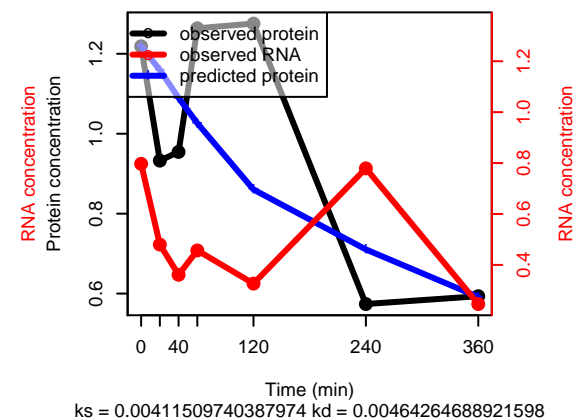

EFB1

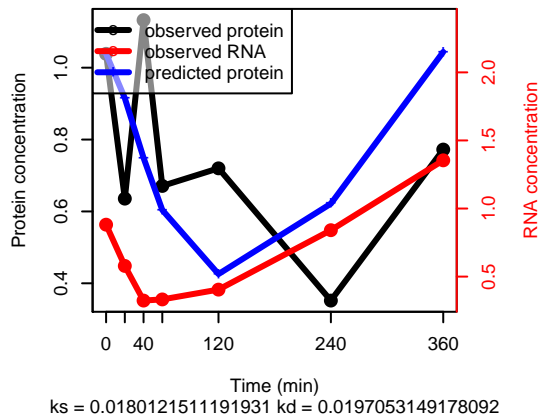

TY1B-DR1

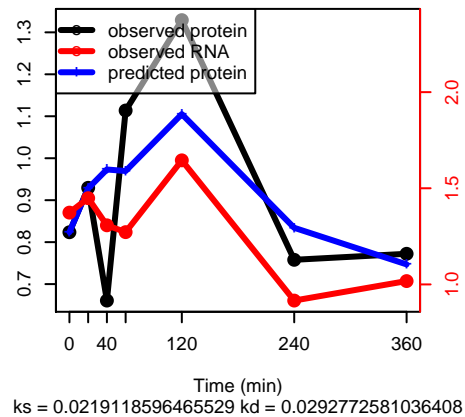

FAS1

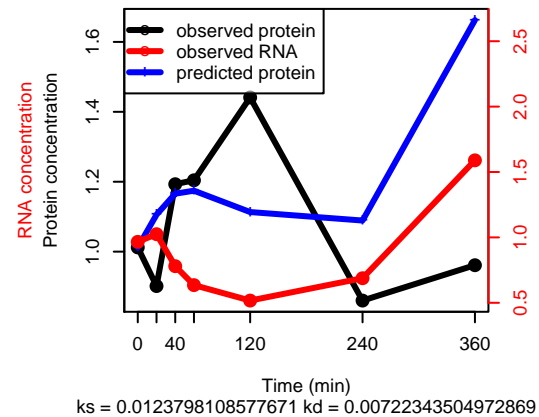

TY1A-A

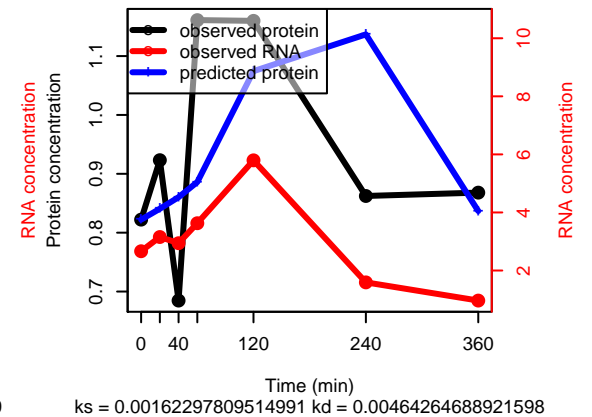

THS1

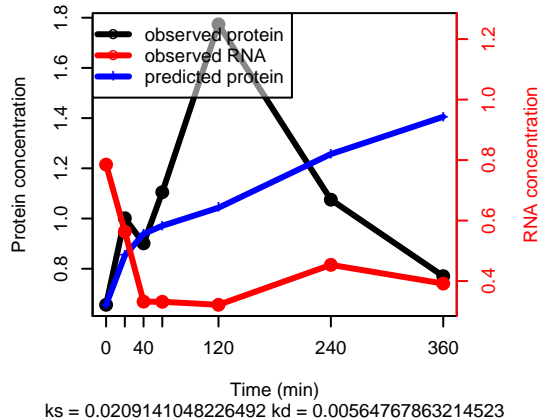

ADE5-7

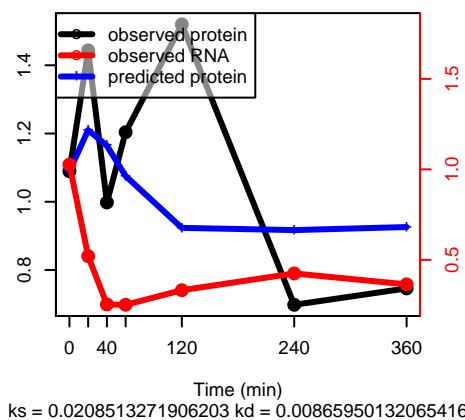

CDC60

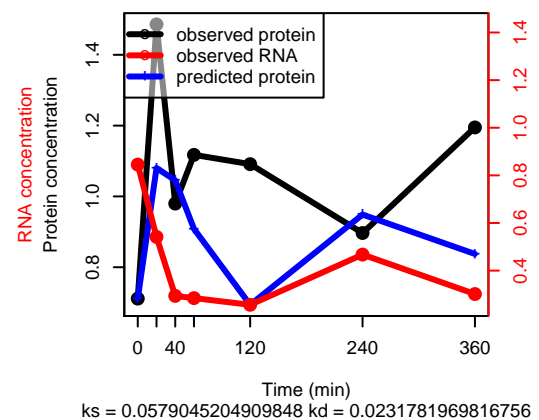

ADE3

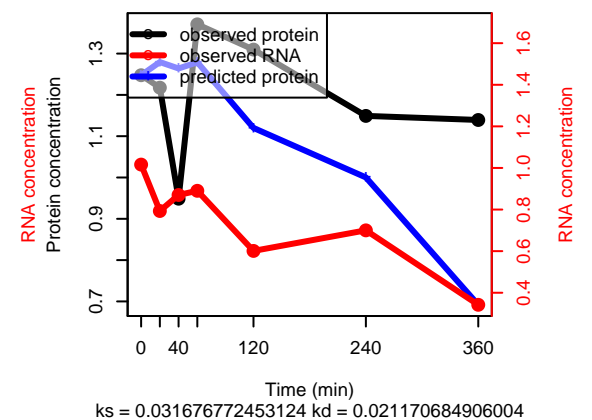

RPS5

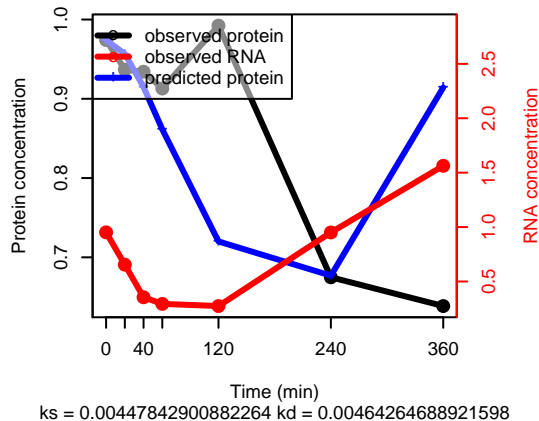

THR4

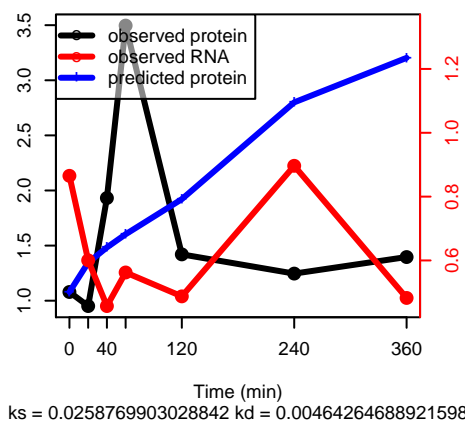

GPD1

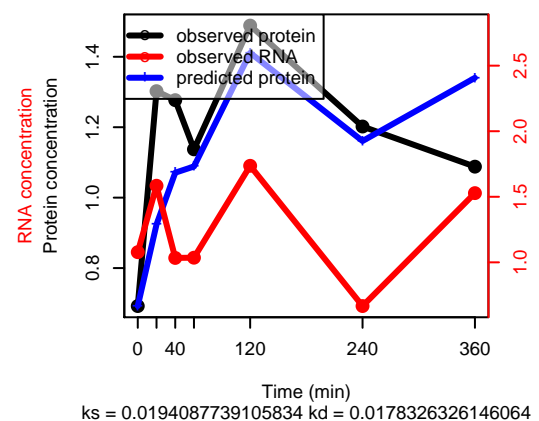

HYP2

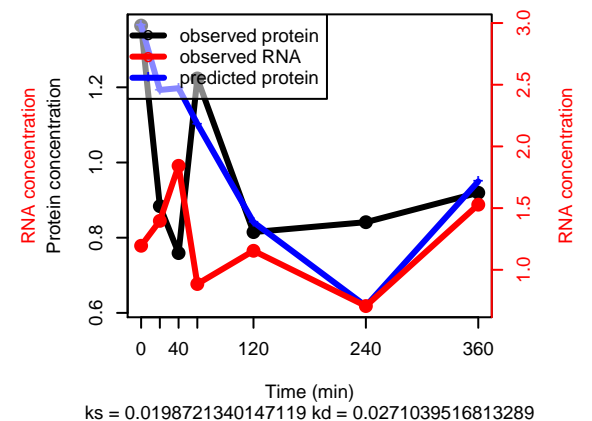

BMH2

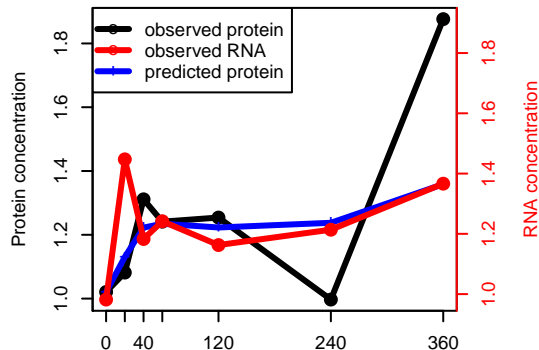

SER1

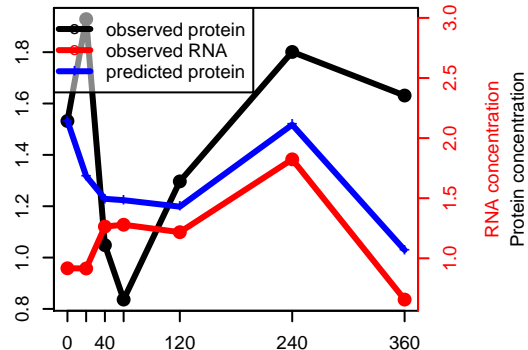

GUS1

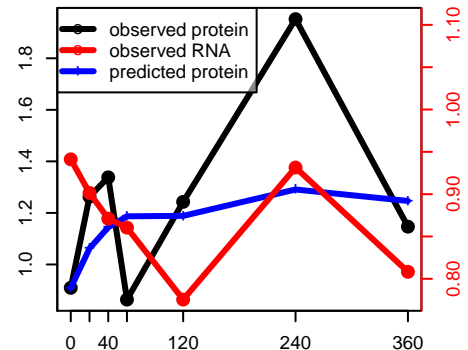

HTA2

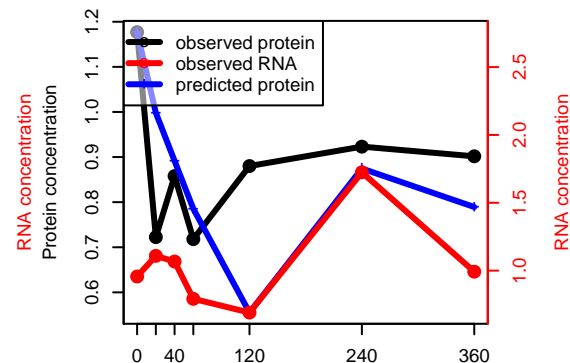

ACC1

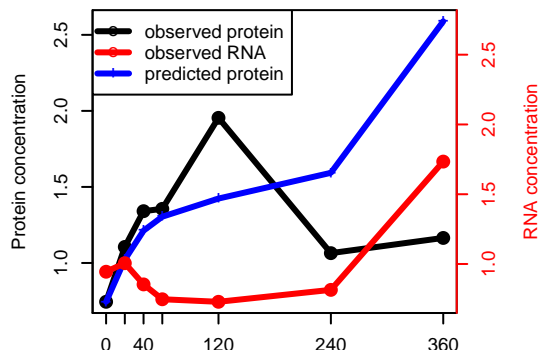

TY1A-DR6

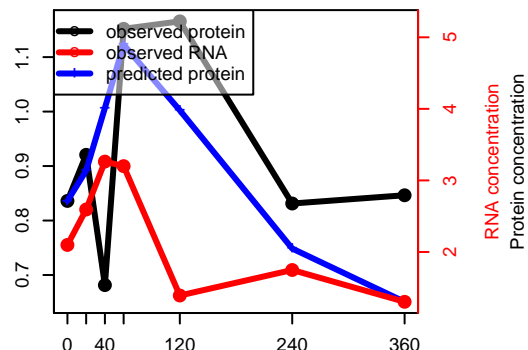

RPL19B

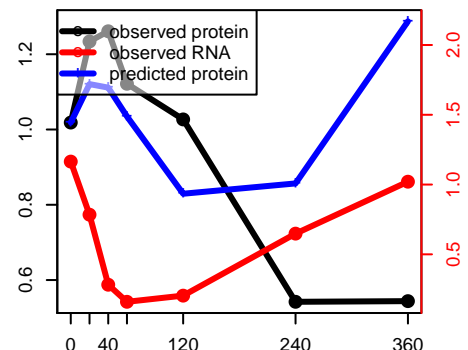

TAL1

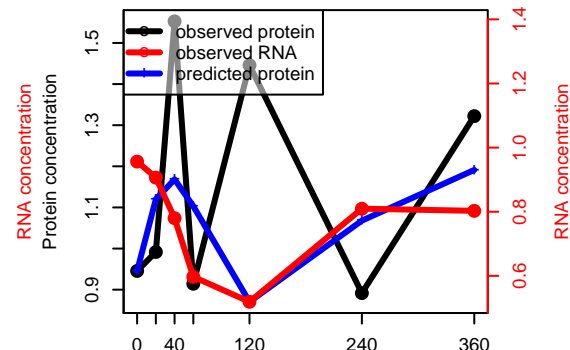

URA2

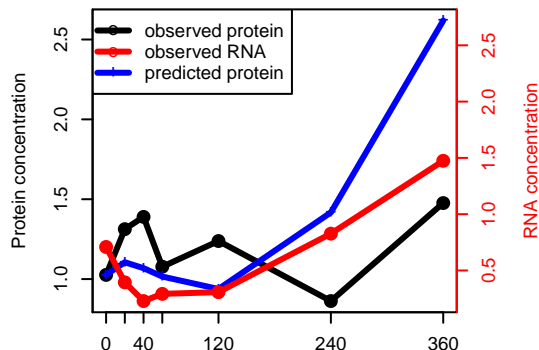

ADE6

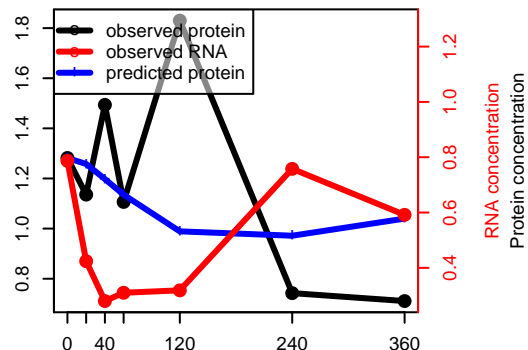

TY1B-DR6

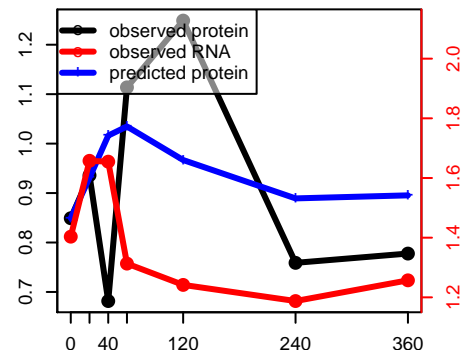

SRV2

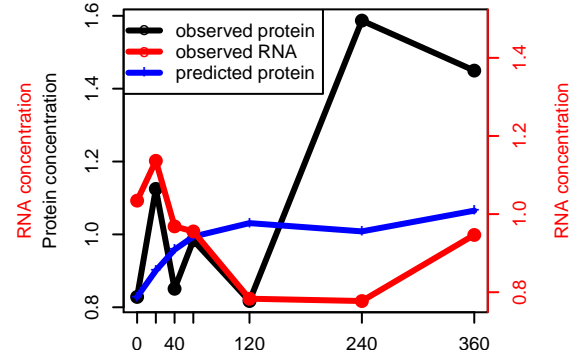

LPD1

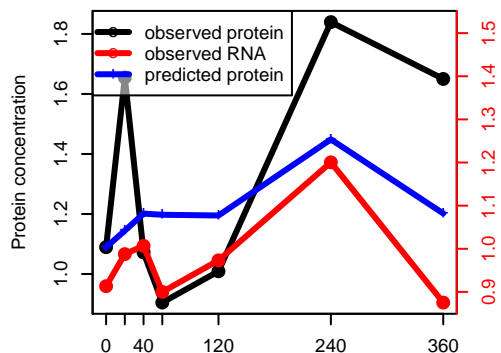

SRP1

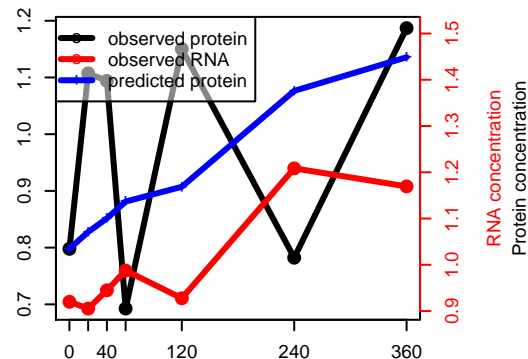

QCR2

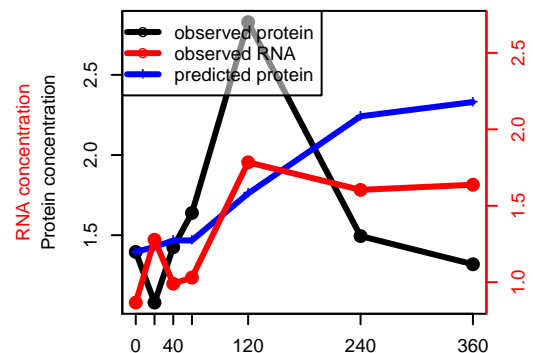

TPS1

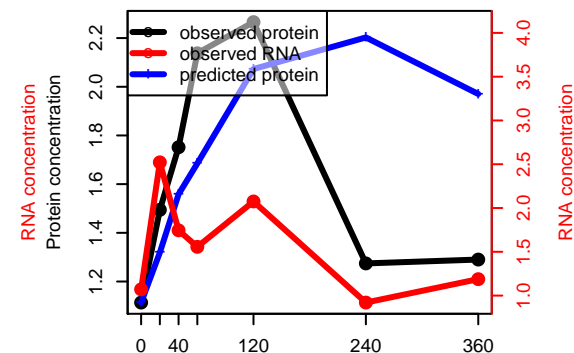

SAM1

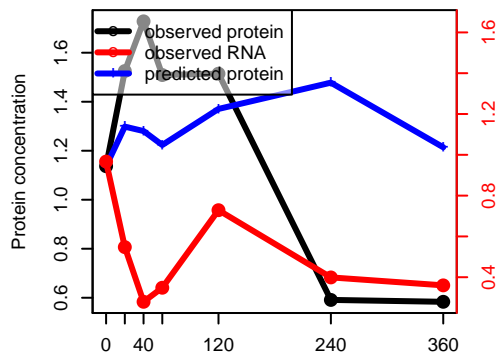

PGI1

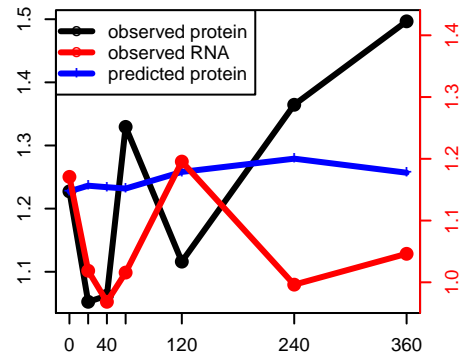

ADH3

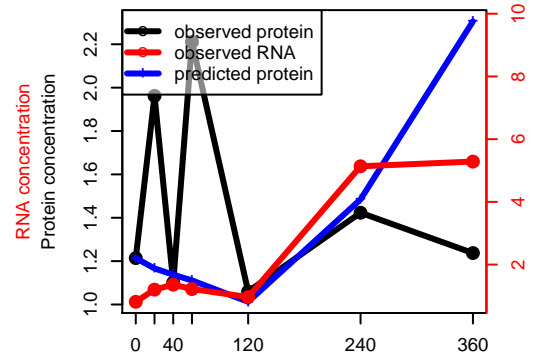

ADE17

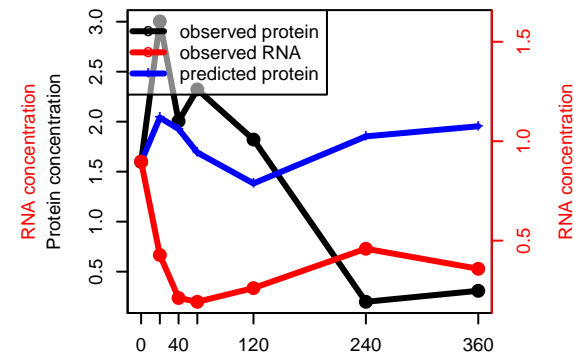

RPL9B

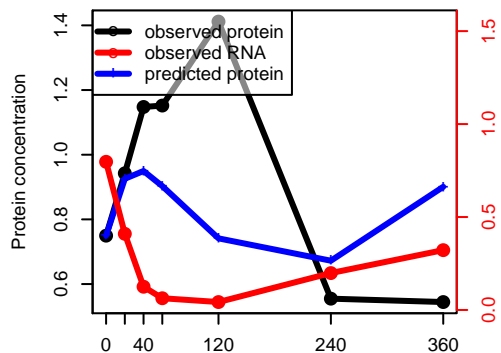

RPL31B

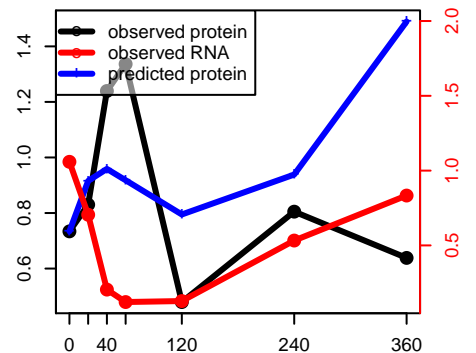

TEF4

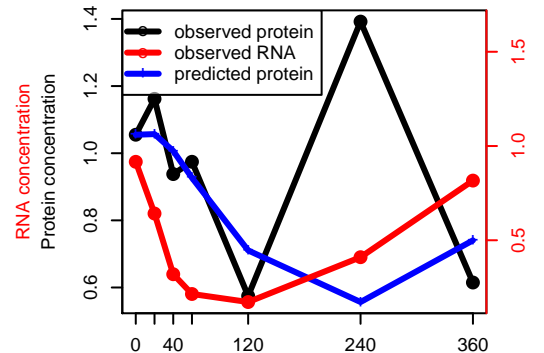

CAR2

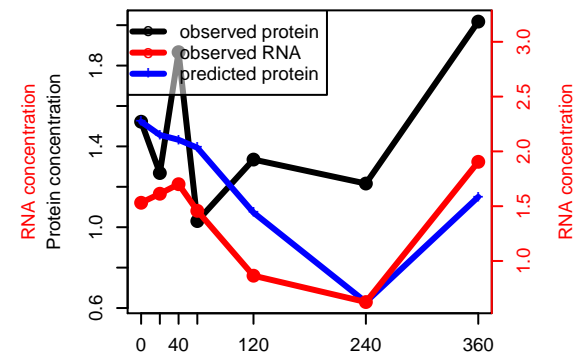

VMA5

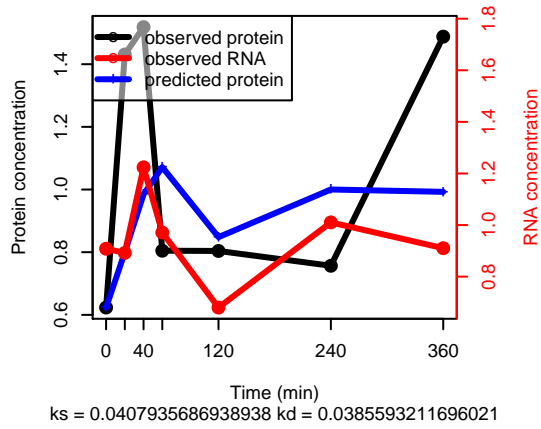

RPS20

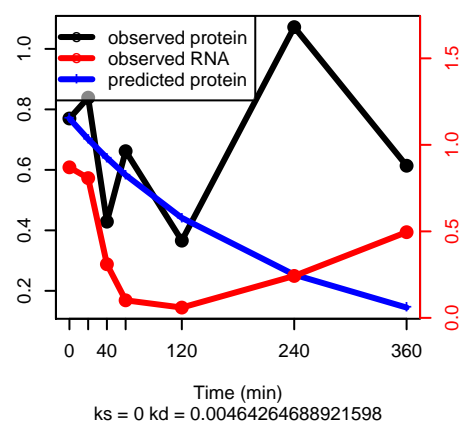

RPS7B

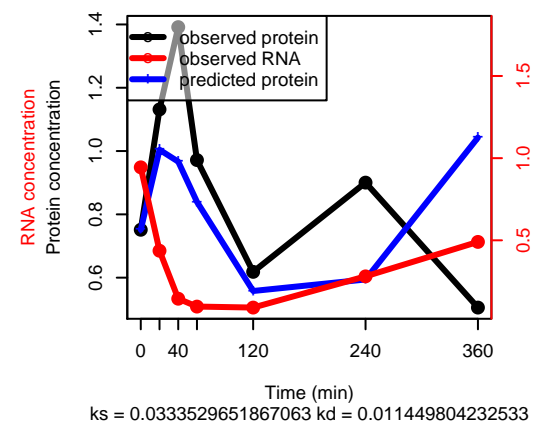

GIS2

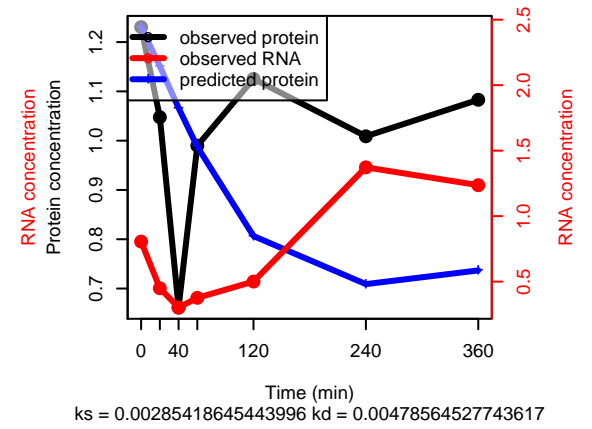

PUP3

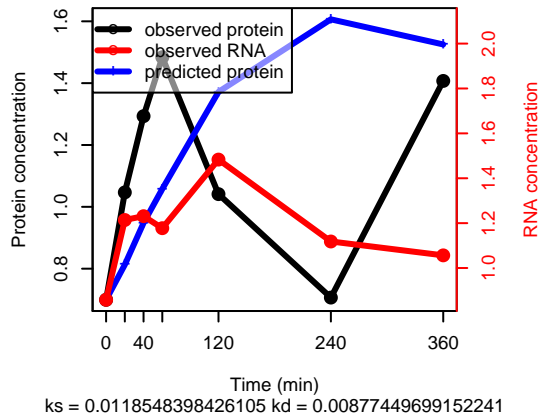

HXT3

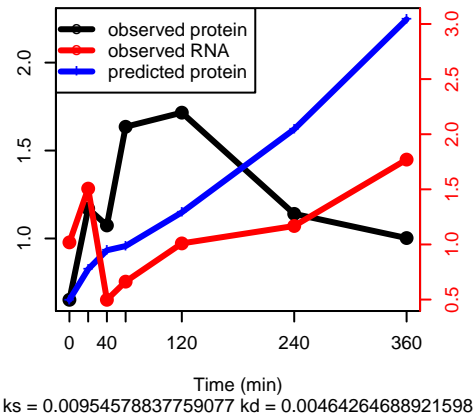

GSY2

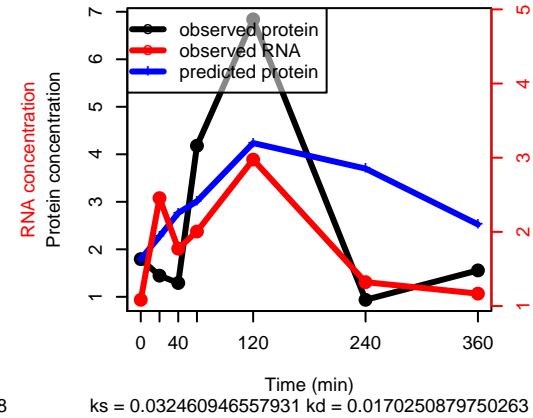

TY1B-BL

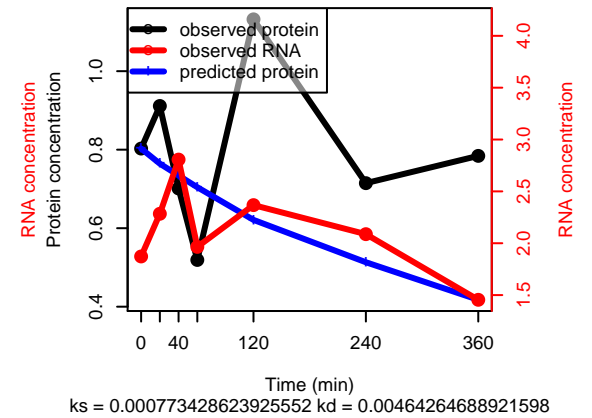

SSA2

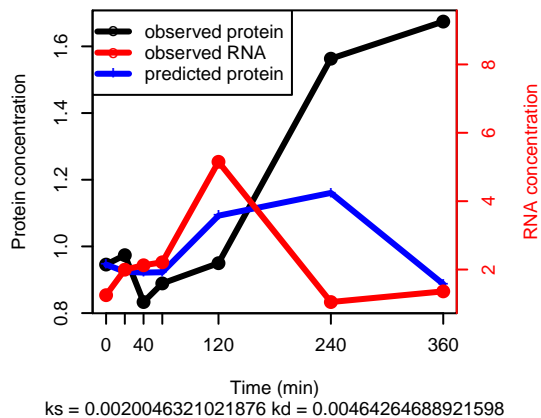

SNU13

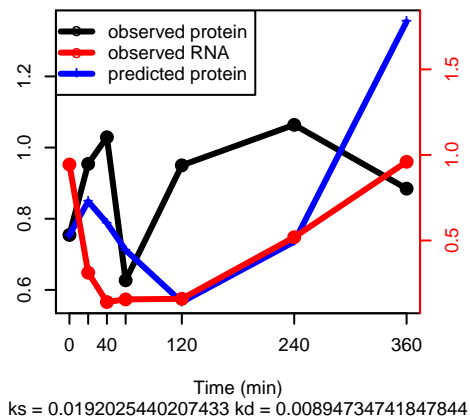

LEU1

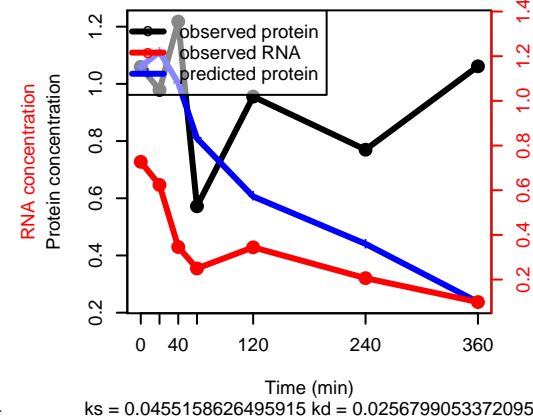

FRS1

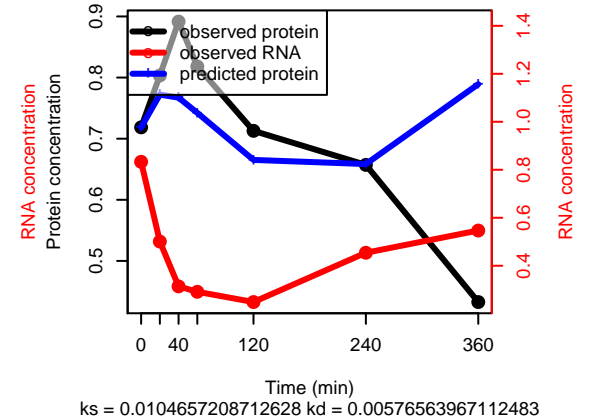

PDC5

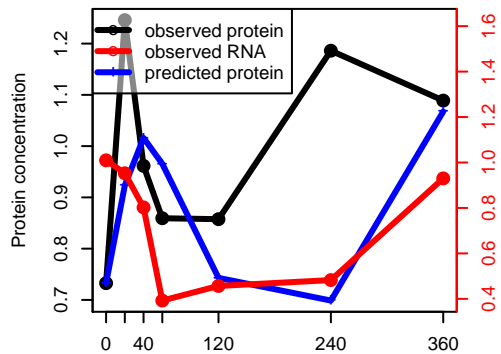

ks = 0.0238277831434192 kd = 0.0165846541508287

ILS1

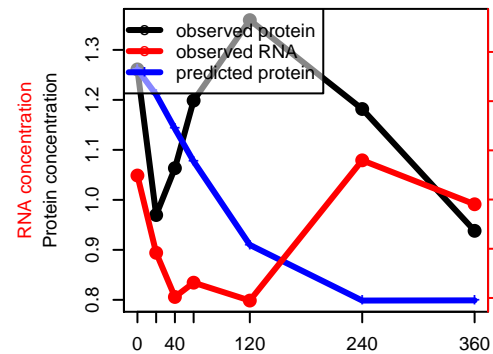

ks = 0.00434439777646462 kd = 0.00464264688921598

TPD3

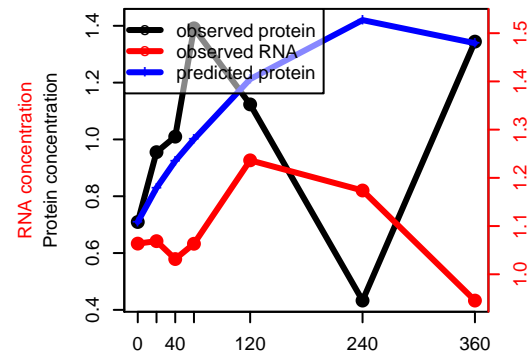

ks = 0.0129610057218525 kd = 0.0101500511418955

CCT8

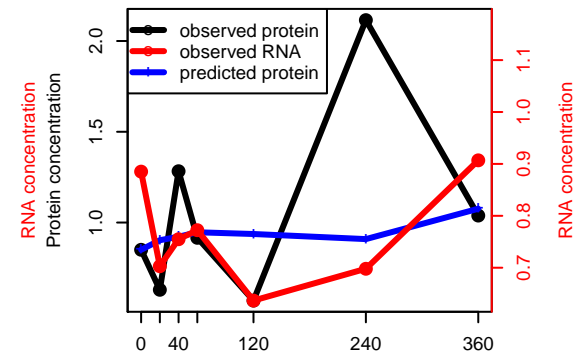

ks = 0.0190114416127441 kd = 0.014138266192126

ERG13

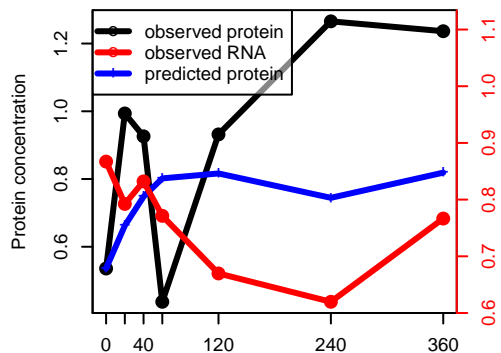

ks = 0.0205937860363042 kd = 0.017823448863571

ARO8

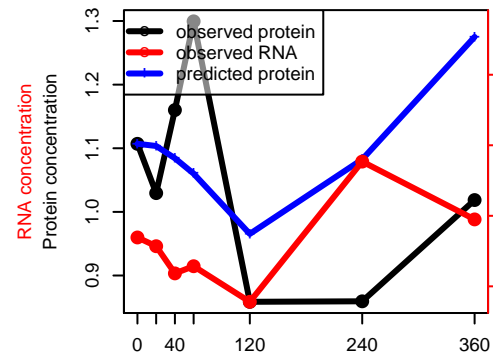

ks = 0.00608211045980171 kd = 0.00464264688921598

HXK1

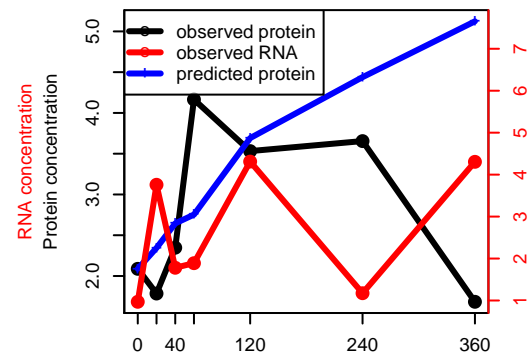

ks = 0.00969584182978865 kd = 0.00464264688921598

TY1B-GR1

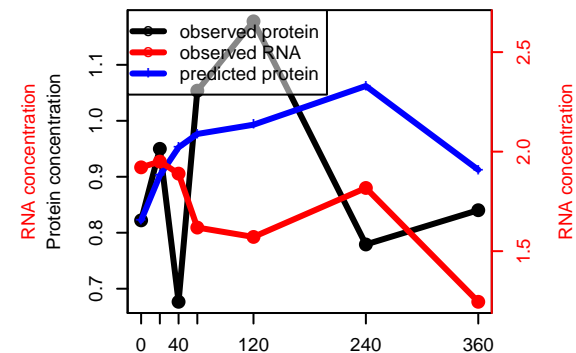

ks = 0.0109632711151997 kd = 0.0199325321148485

ARO1

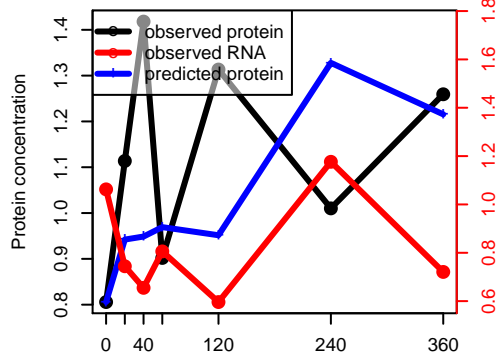

ks = 0.026285697170876 kd = 0.0190235386547976

TDH1

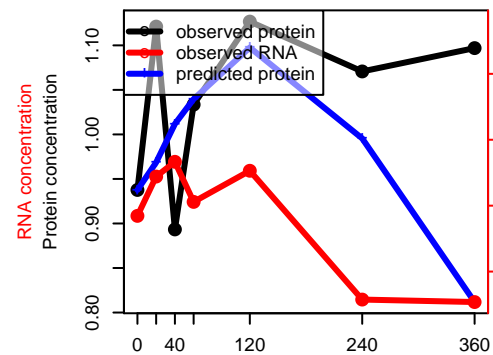

ks = 0.00447270233579095 kd = 0.00811315893890641

GFA1

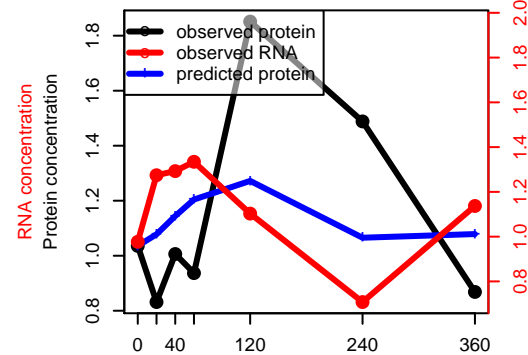

ks = 0.0110680437117637 kd = 0.00981412911443478

CDC19

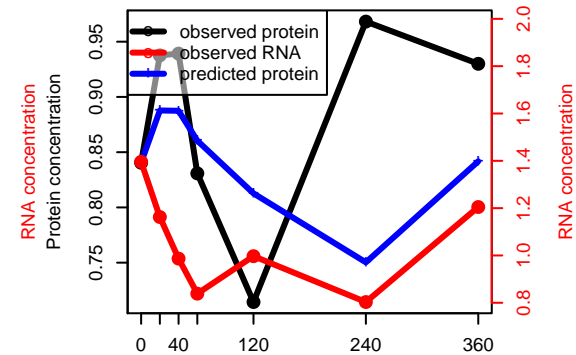

ks = 0.00977293181340217 kd = 0.011699953386049

SAM2

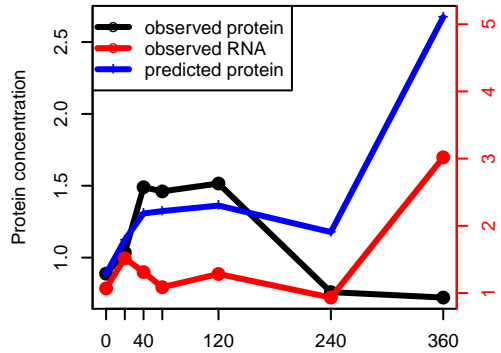

Time (min)  
ks = 0.0285117206476472 kd = 0.0252049154517084

IPP1

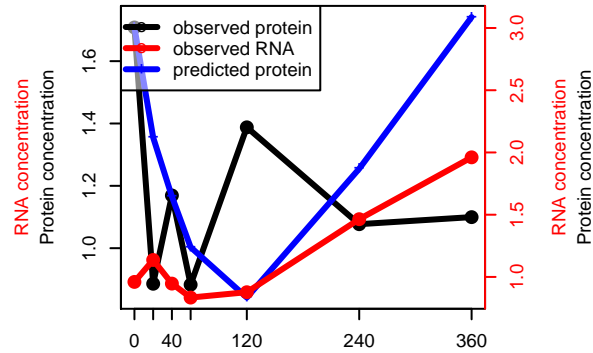

Time (min)  
ks = 0.0326710239990778 kd = 0.0345116778781836

DBP5

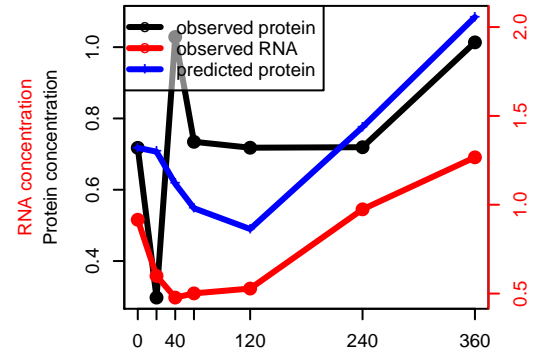

Time (min)  
ks = 0.0250672874884885 kd = 0.0269965623711503

GRS1

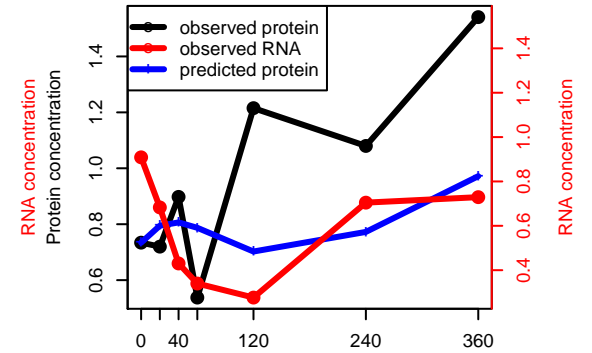

Time (min)  
ks = 0.00947967813097931 kd = 0.00588329467484051

GET3

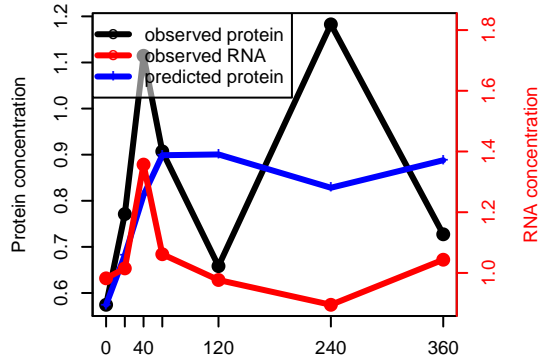

Time (min)  
ks = 0.0185514748117418 kd = 0.0208453699204999

ARC1

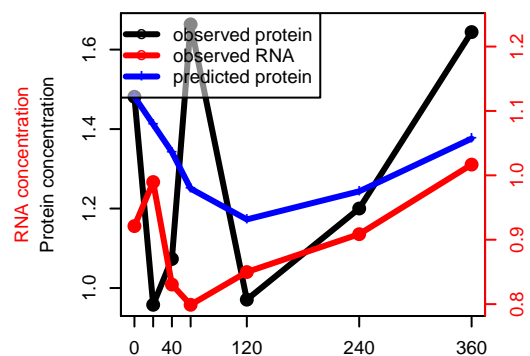

Time (min)  
ks = 0.0411218233286642 kd = 0.0297066325565819

VMA4

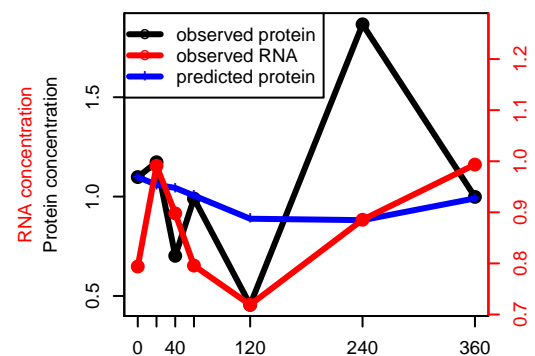

Time (min)  
ks = 0.0162558457767422 kd = 0.0153217616072846

TY1B-GR3

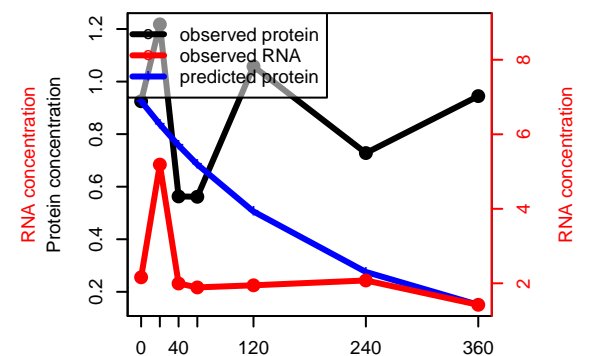

Time (min)  
ks = 0 kd = 0.00504667893961342

STI1

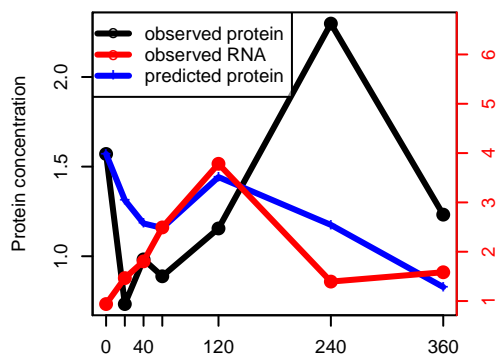

Time (min)  
ks = 0.0078162353479075 kd = 0.0155626256814929

SHM1

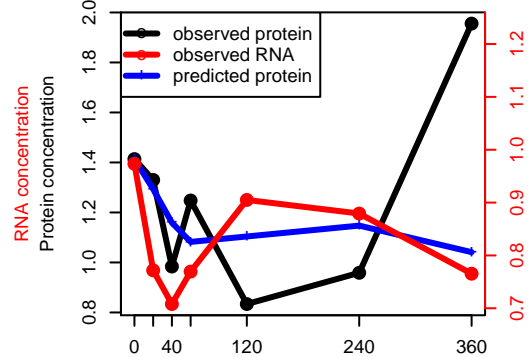

Time (min)  
ks = 0.0336375257173023 kd = 0.0260565255645909

SSA4

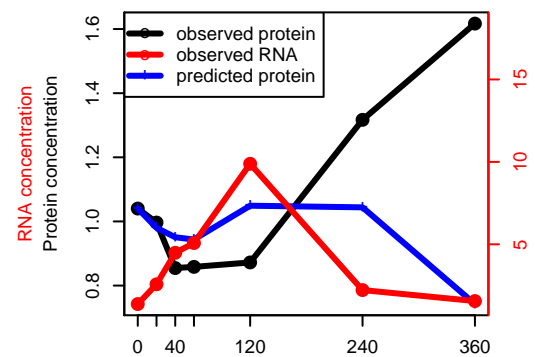

Time (min)  
ks = 0.000847512376559203 kd = 0.00464264688921598

YEF3

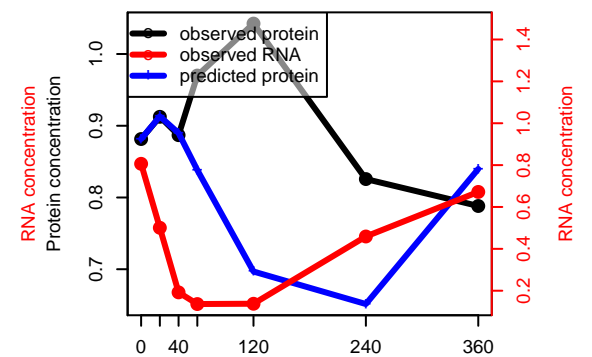

Time (min)  
ks = 0.00879551166366805 kd = 0.00464264688921598



RPS8A

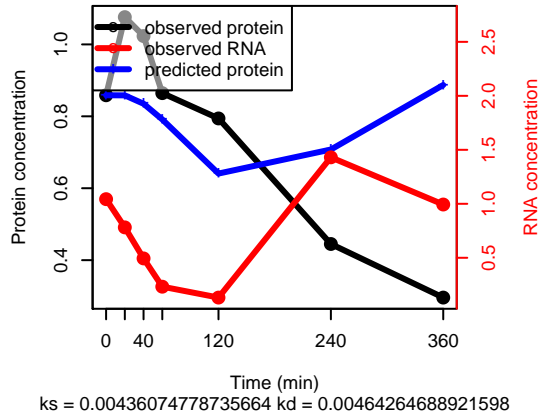

SCP160

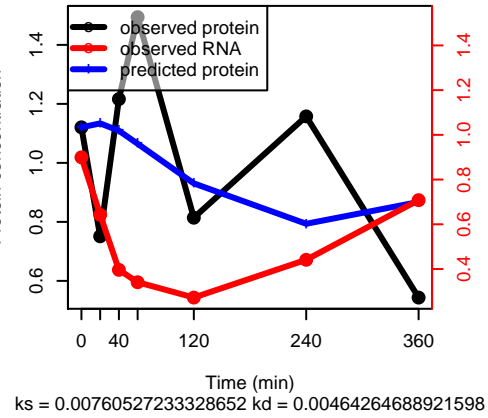

ILV2

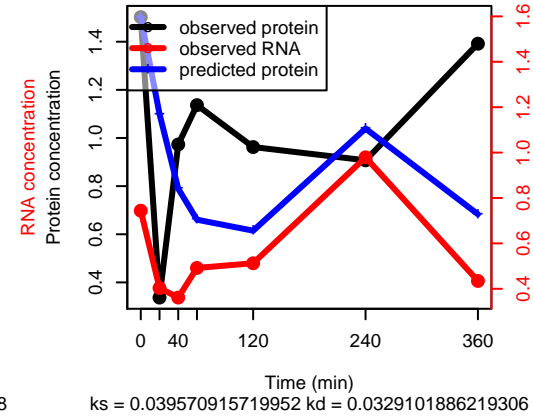

ADH2

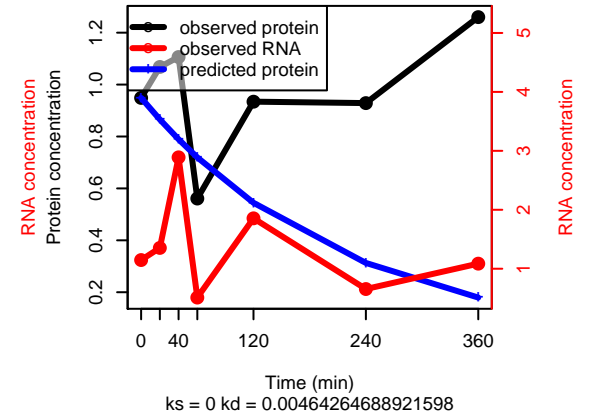

ABP1

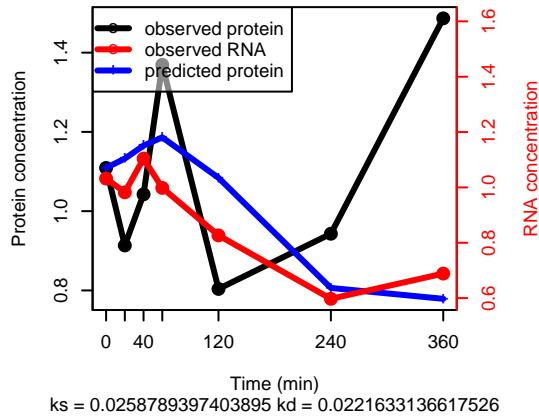

SAH1

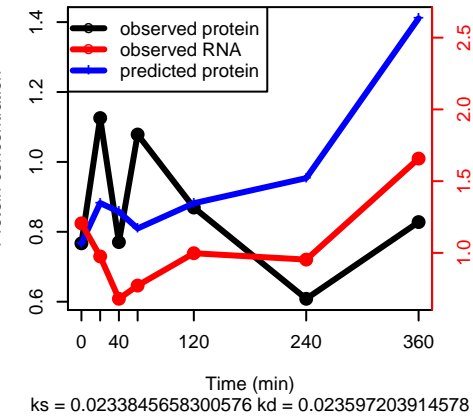

GDH3

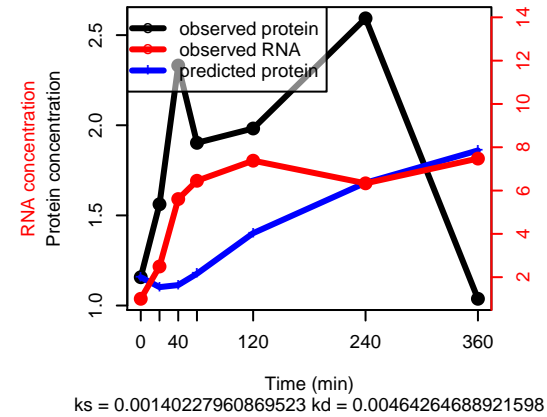

YHR020W

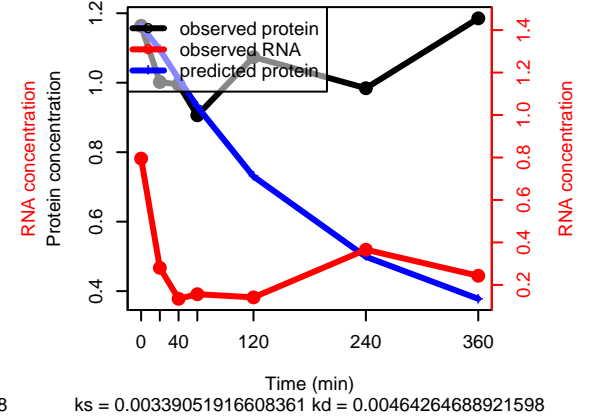

NOP58

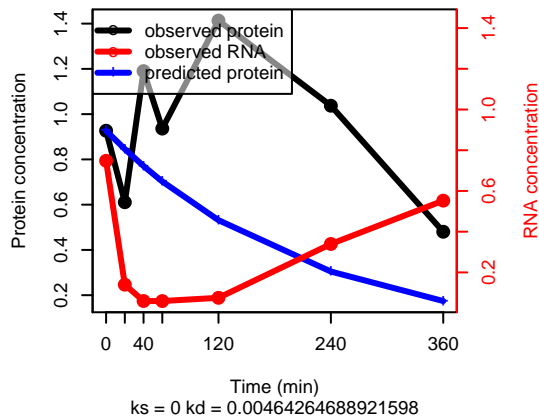

NPL3

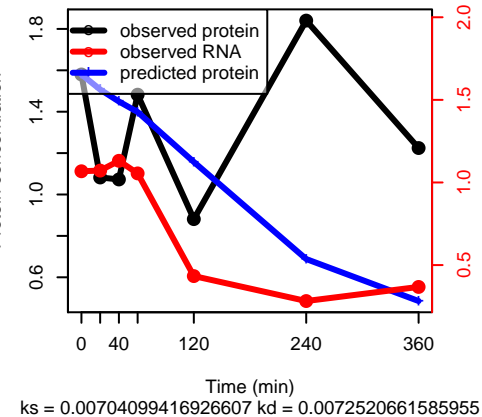

ARA1

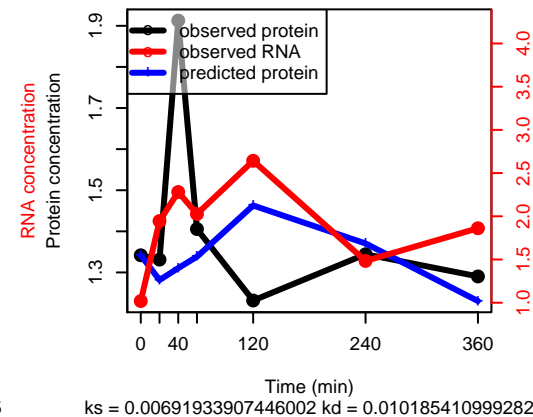

PSA1

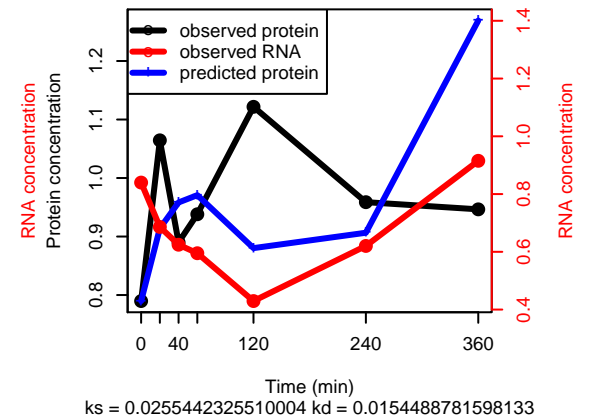

CPA2

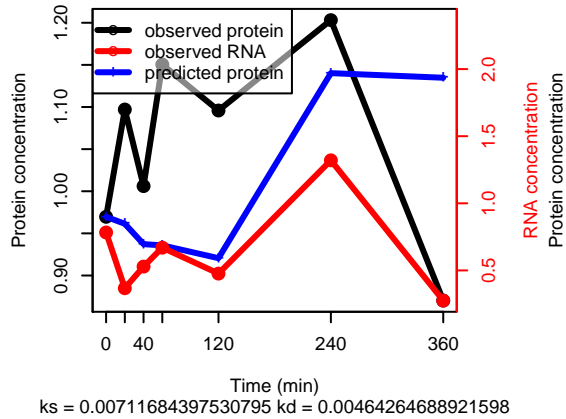

YDJ1

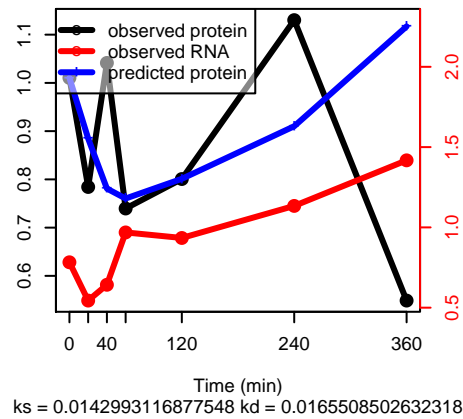

TUF1

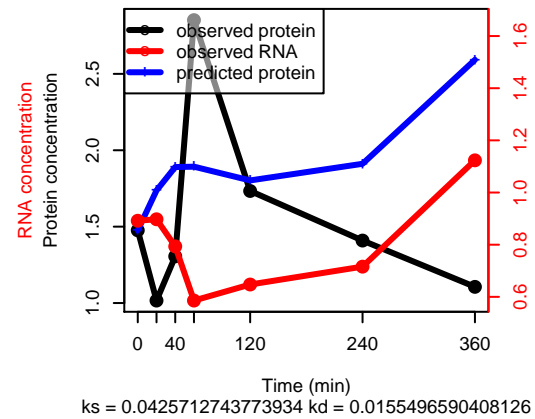

TPI1

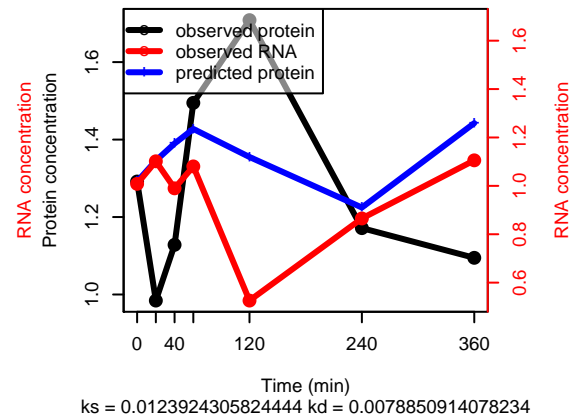

MET6

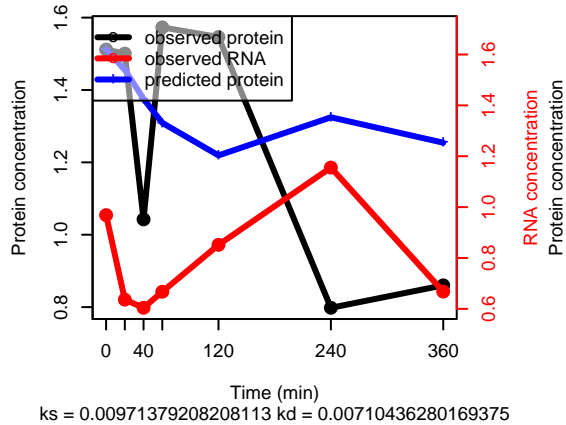

PGK1

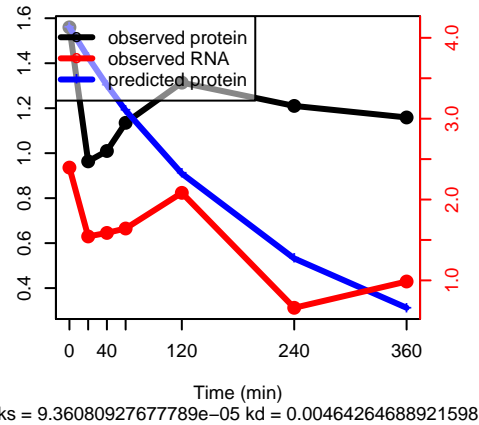

NOP1

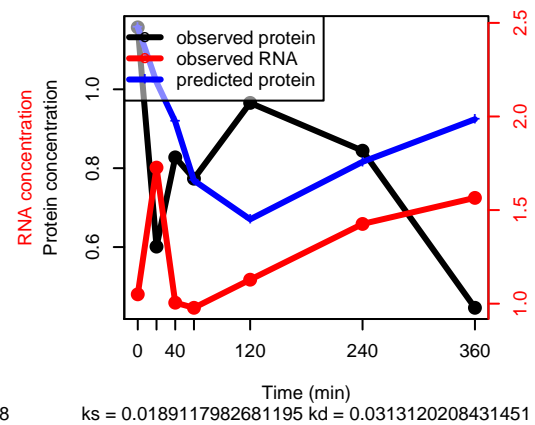

TY1B-DR4

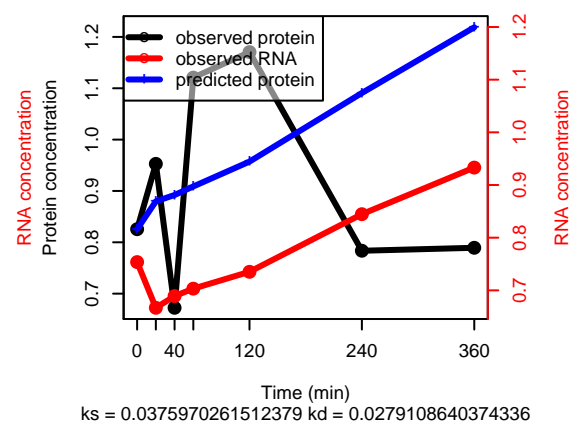

GND2

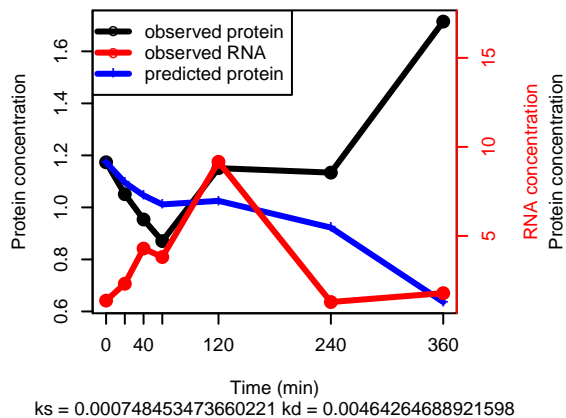

CYS3

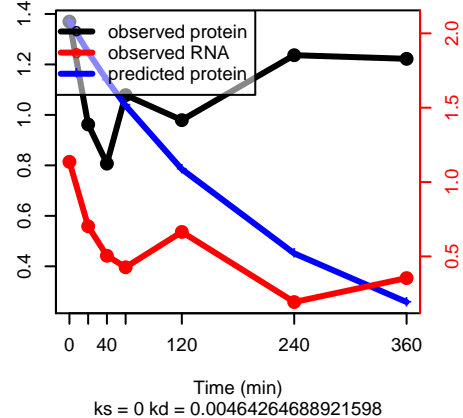

TIF5

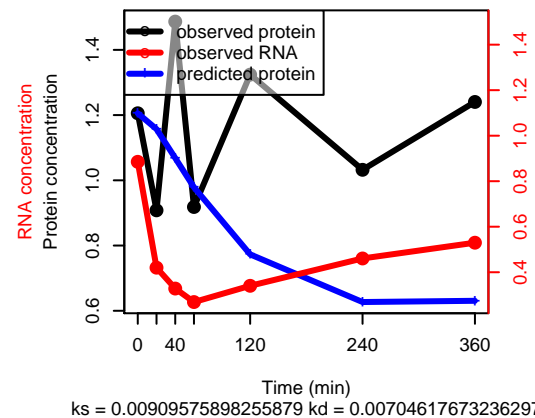

VPS1

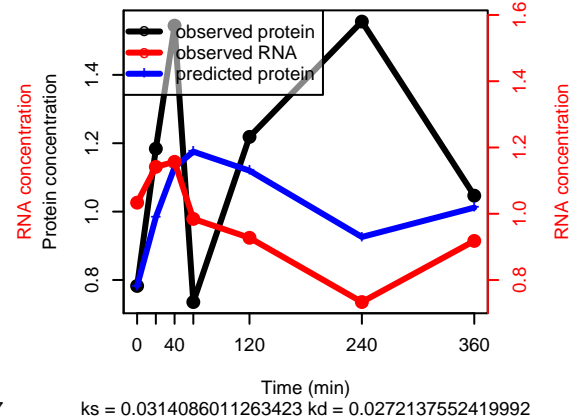

NEW1

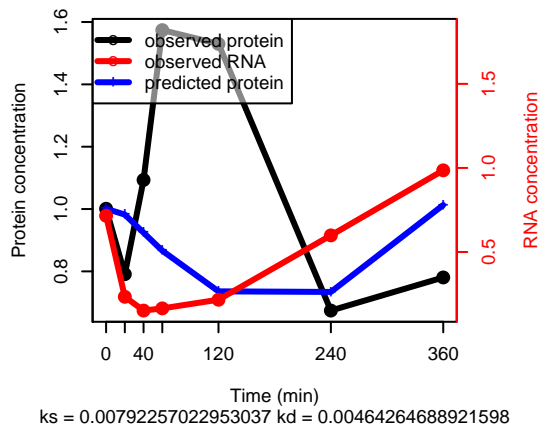

ARX1

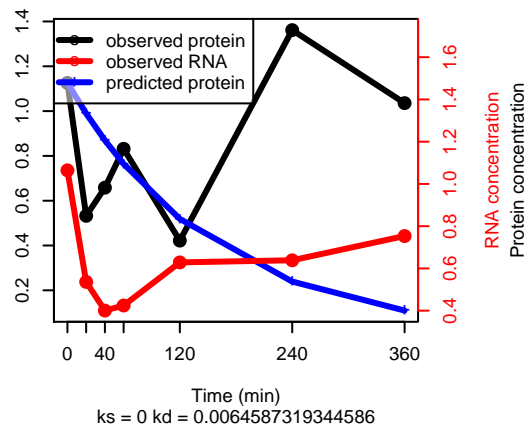

YDR341C

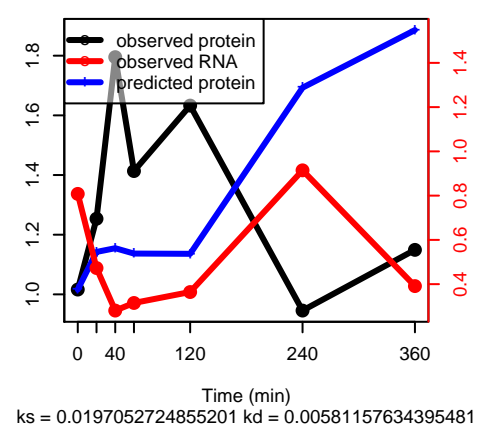

HSP60

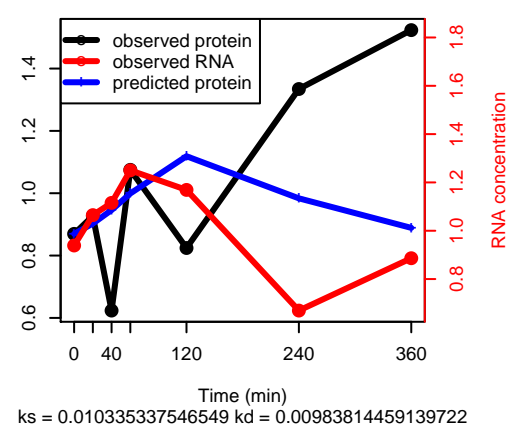

YMR226C

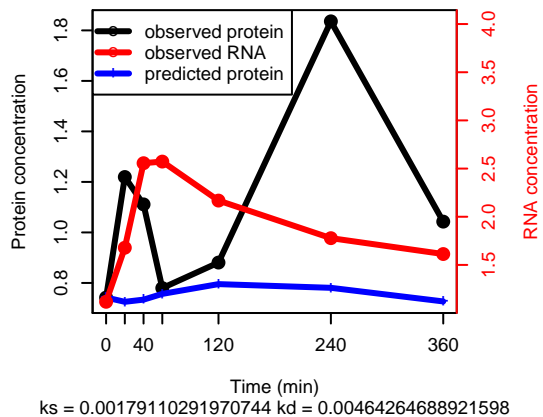

ARO4

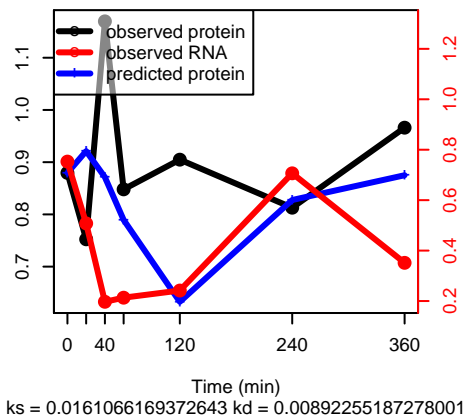

GVP36

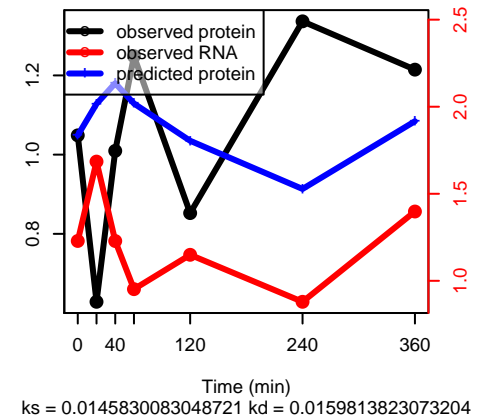

ASN1

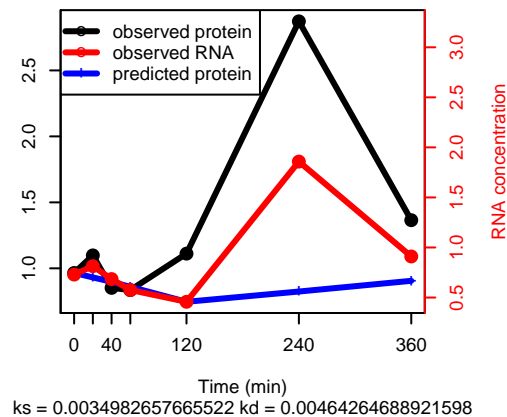

GPM1

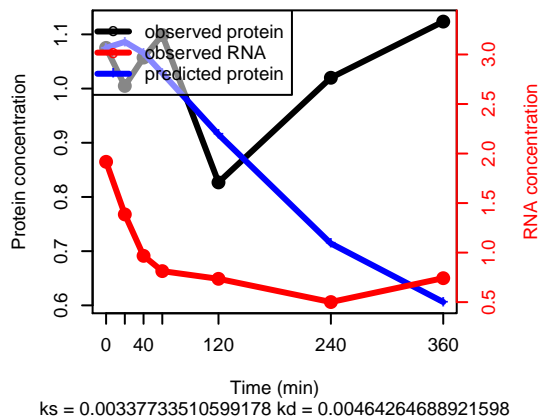

FRS2

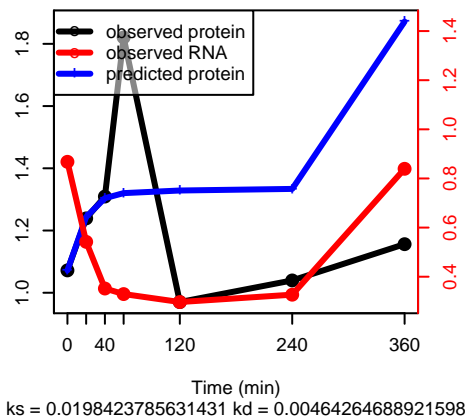

MAP1

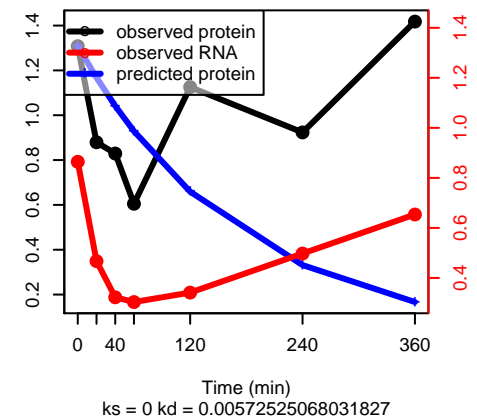

LYS20

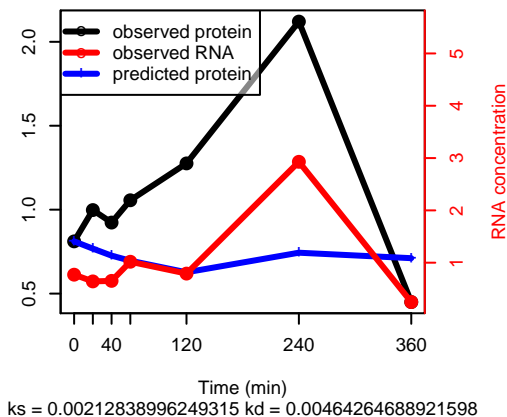

ZWF1

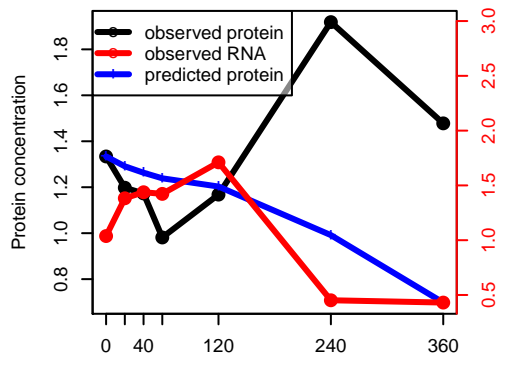

Time (min)  
ks = 0.00319649712823151 kd = 0.00464264688921598

ATP2

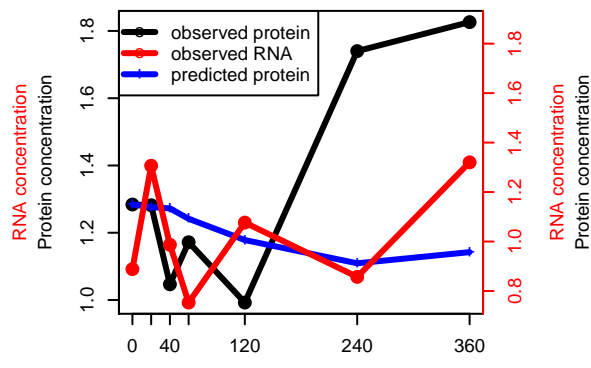

Time (min)  
ks = 0.00499742271010023 kd = 0.00464264688921598

AAT2

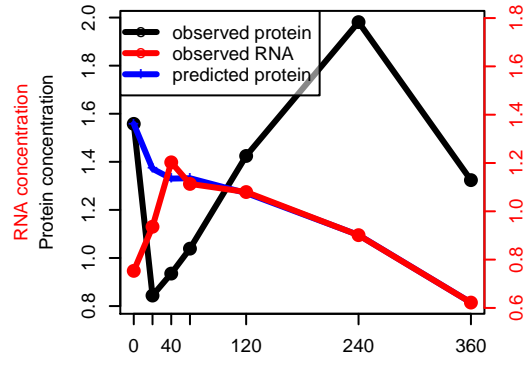

Time (min)  
ks = 0.0231054086133589 kd = 0.0198586057535988

PDB1

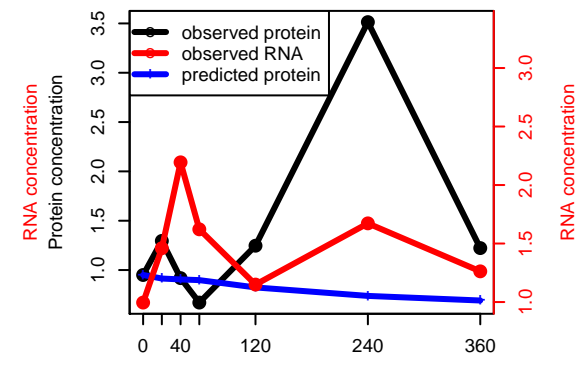

Time (min)  
ks = 0.00206552545777904 kd = 0.00471822842342062

MES1

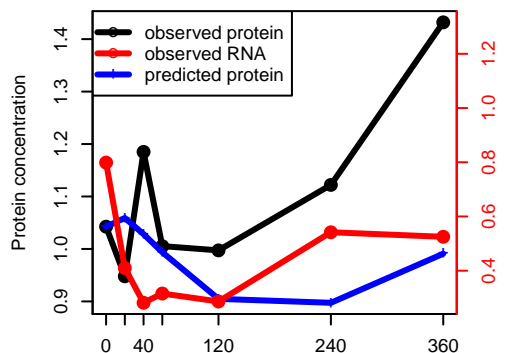

Time (min)  
ks = 0.00958825793781331 kd = 0.00464264688921598

PAB1

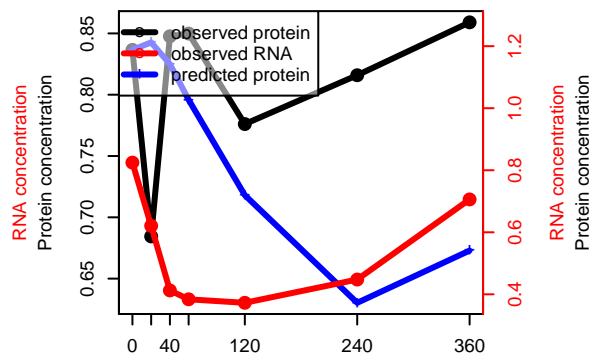

Time (min)  
ks = 0.00580785611693656 kd = 0.00464264688921598

ADE4

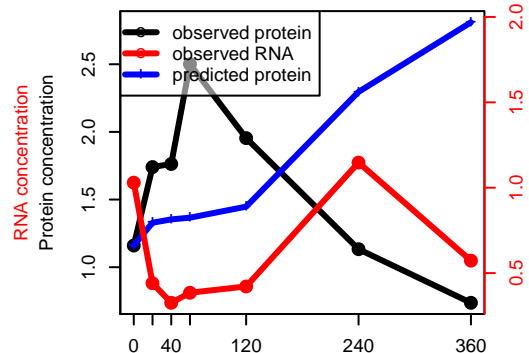

Time (min)  
ks = 0.019421758124929 kd = 0.00464264688921598

PIL1

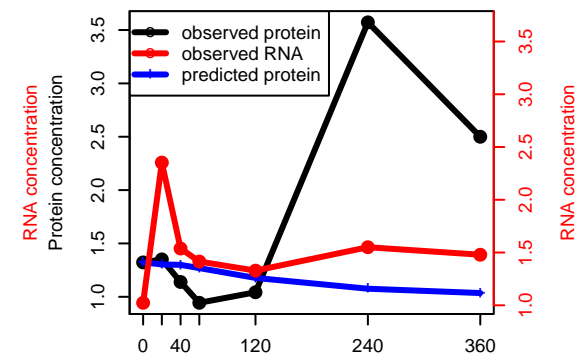

Time (min)  
ks = 0.00301120681316059 kd = 0.00464264688921598

GLN1

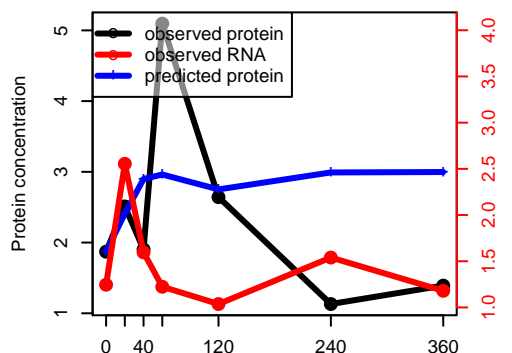

Time (min)  
ks = 0.0271941303247312 kd = 0.0118268819632139

NIP1

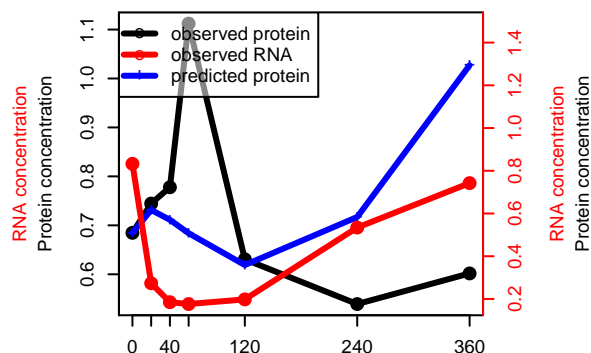

Time (min)  
ks = 0.0102249515470458 kd = 0.00464264688921598

SES1

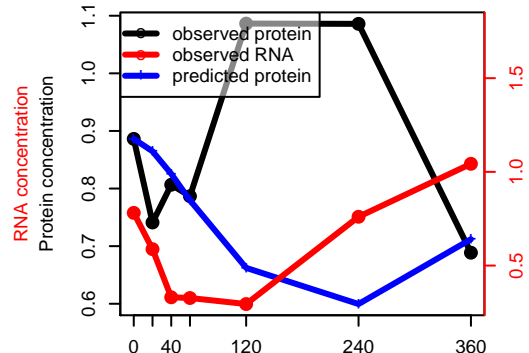

Time (min)  
ks = 0.00437127769674504 kd = 0.00464264688921598

RPL1B

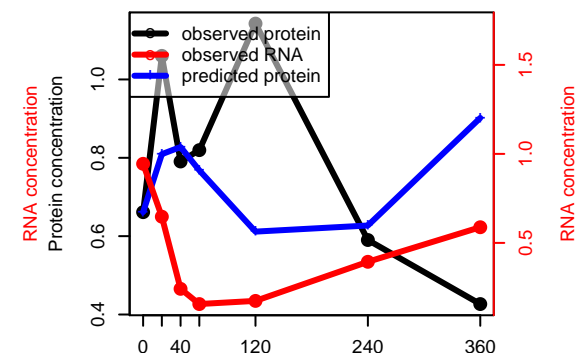

Time (min)  
ks = 0.0167987898078253 kd = 0.00803303805570296

MAE1

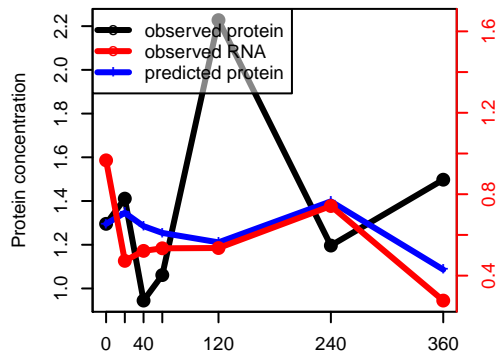

Time (min)  
ks = 0.0270072487618829 kd = 0.0125885369755545

ADH1

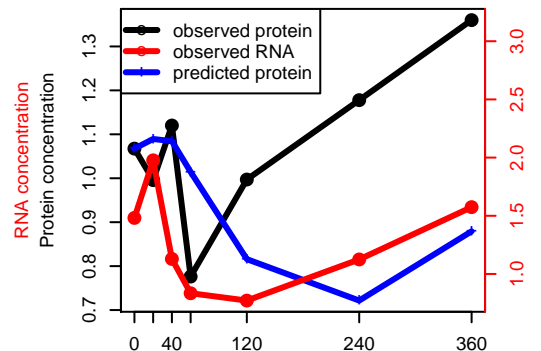

Time (min)  
ks = 0.00644509004051761 kd = 0.00933321252847834

ASN2

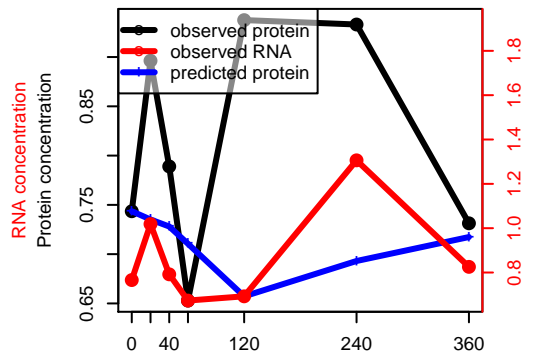

Time (min)  
ks = 0.00336720607984084 kd = 0.00464264688921598

ALD6

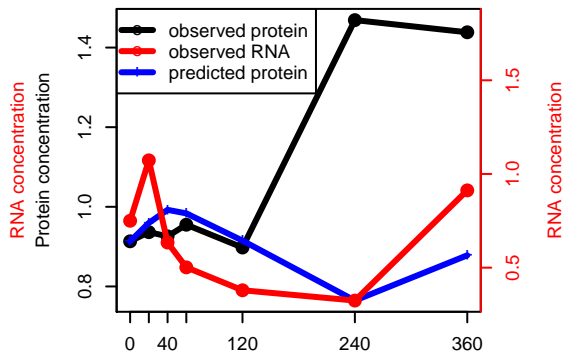

Time (min)  
ks = 0.00728277396883017 kd = 0.00464264688921598

DED81

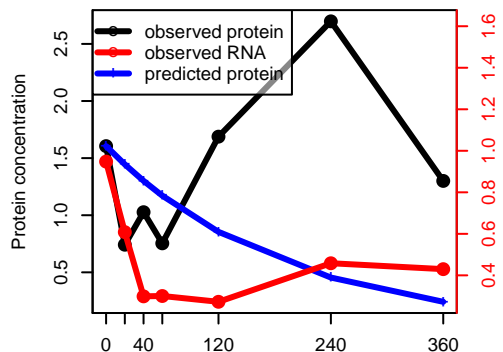

Time (min)  
ks = 0 kd = 0.00525552335748496

VMA6

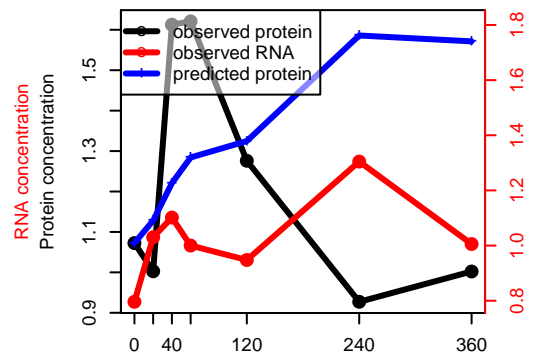

Time (min)  
ks = 0.0194037647736351 kd = 0.0136160221514185

XRN1

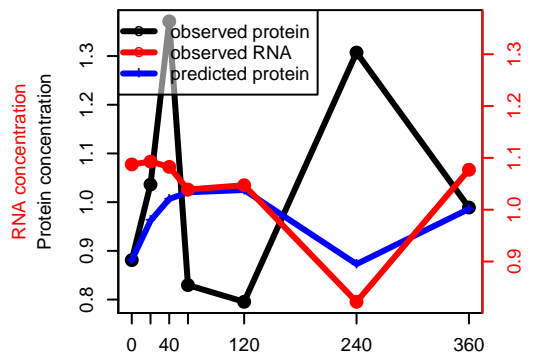

Time (min)  
ks = 0.0264100425606542 kd = 0.0267820660051675

LSP1

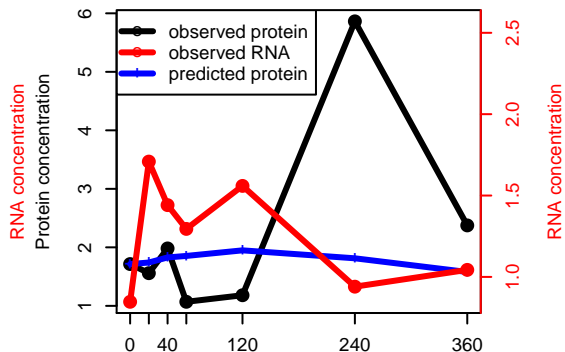

Time (min)  
ks = 0.0121831341123576 kd = 0.00832131407834554

RPS31

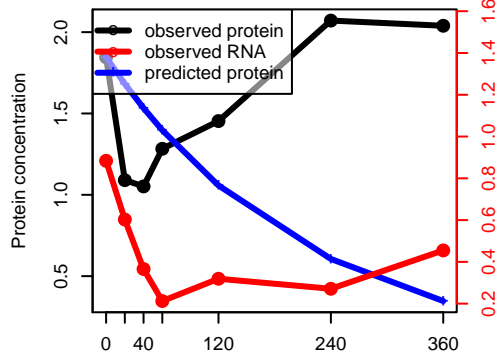

Time (min)  
ks = 0 kd = 0.00464264688921598

PDC1

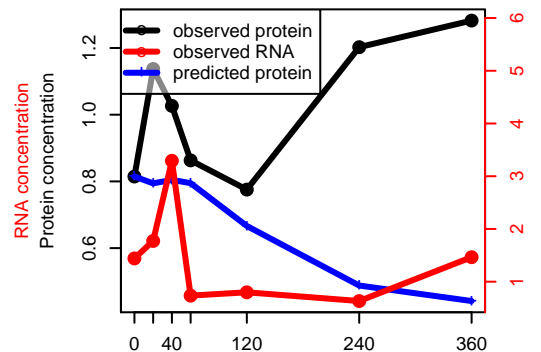

Time (min)  
ks = 0.0016208562553929 kd = 0.00464264688921598

TDH3

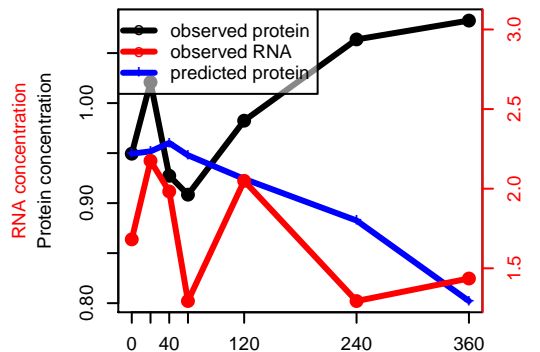

Time (min)  
ks = 0.00234270805645018 kd = 0.00464264688921598

TDH2

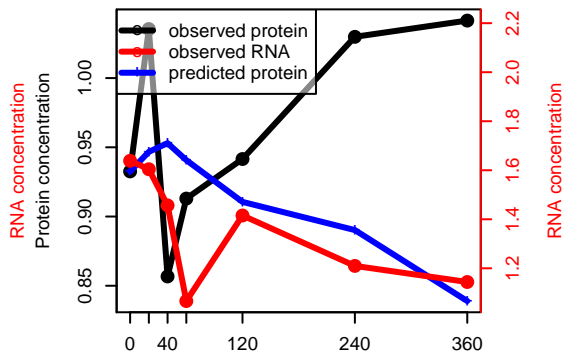

Time (min)  
ks = 0.00368029543650962 kd = 0.0055388863146414

TRR1

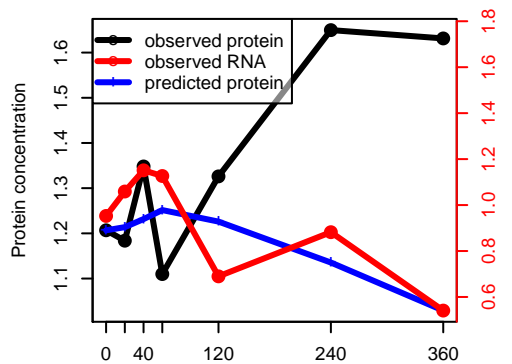

ks = 0.00593006844990069 kd = 0.00464264688921598

ARO3

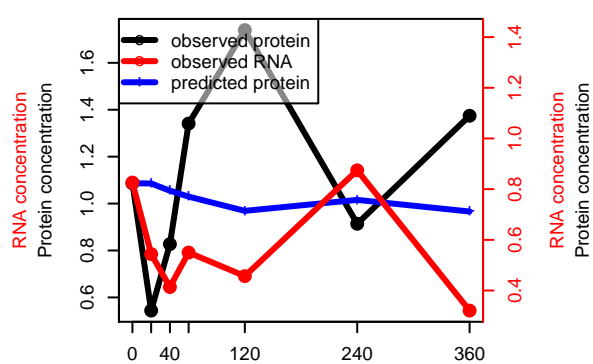

ks = 0.00731453136120928 kd = 0.00464264688921598

ILV6

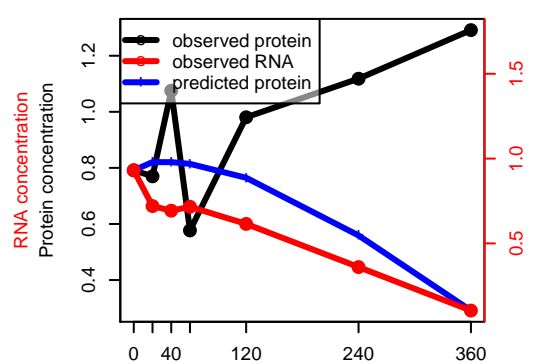

ks = 0.0115094064360521 kd = 0.00996768907336441

ERG10

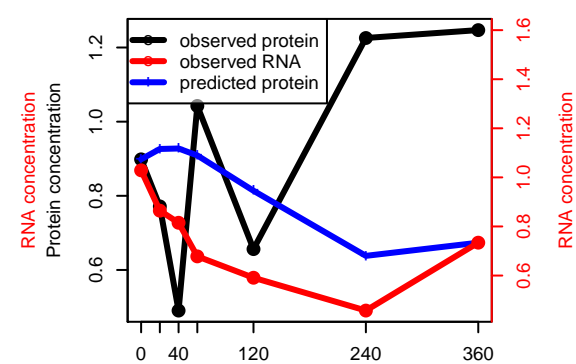

ks = 0.0115167129140011 kd = 0.0103752012703949
