# Supplementary figures and images for: One third of dynamic protein expression profiles can be predicted by a simple rate equation
Source: Royal Society of Chemistry journal article supplement (doi:10.1039/c4mb00358f), 2014-08-01

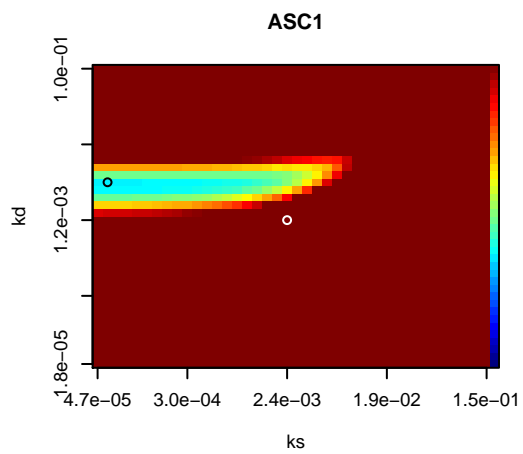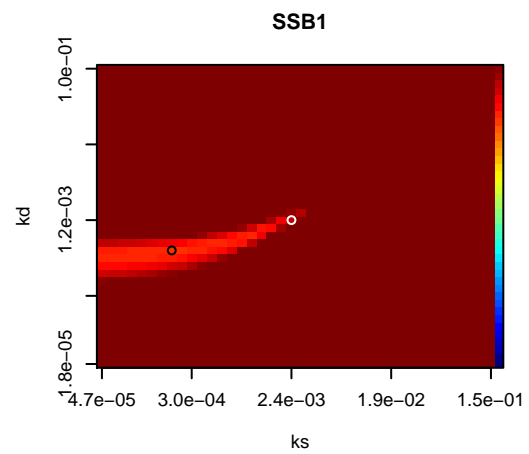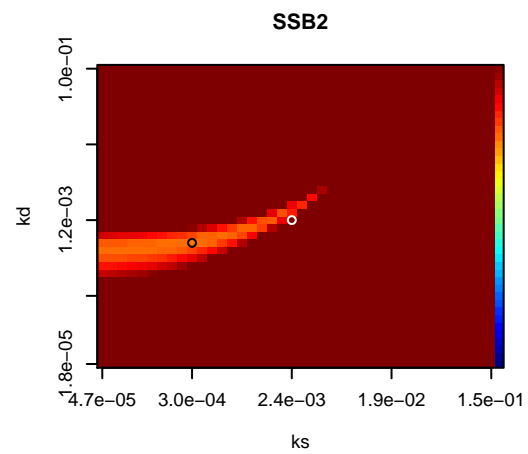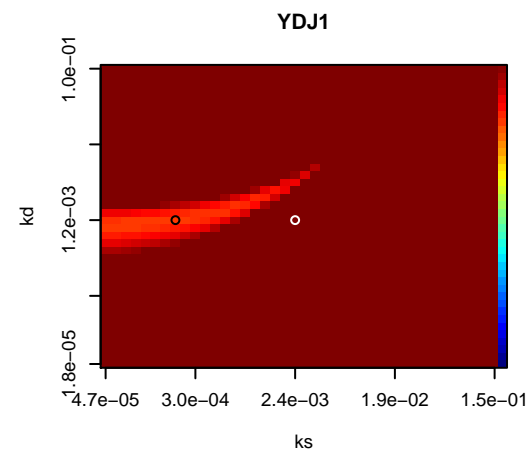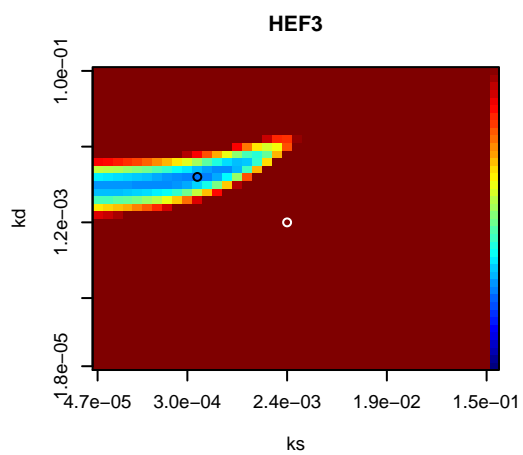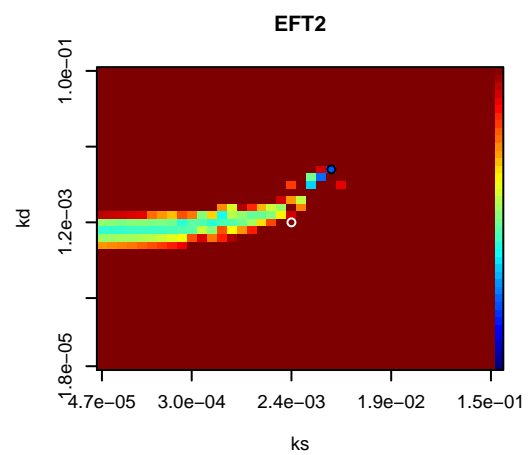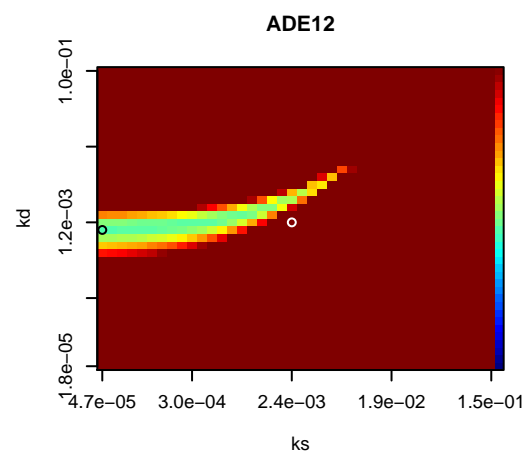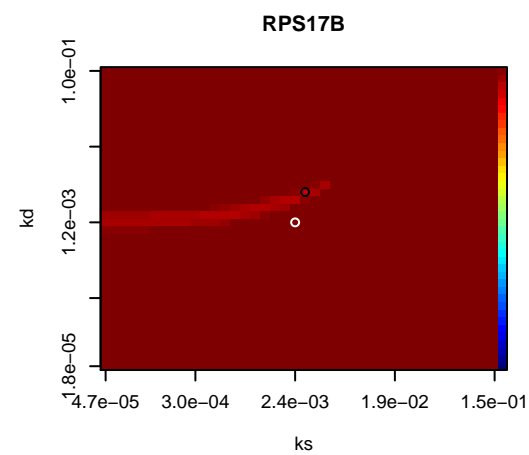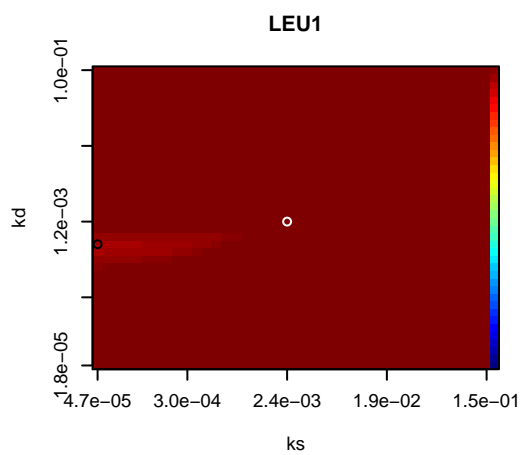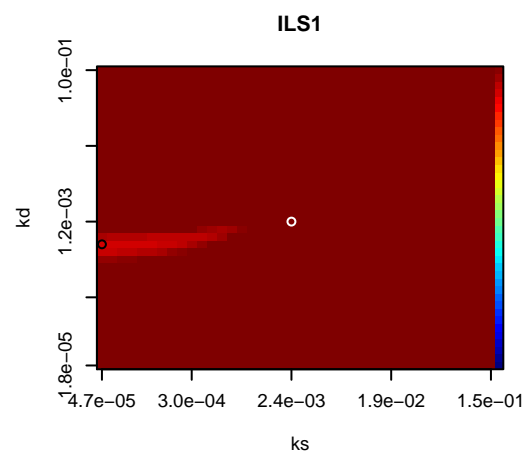

Supplement: c4mb00358f2.zip [file c4mb00358f2.zip]

YLR413W

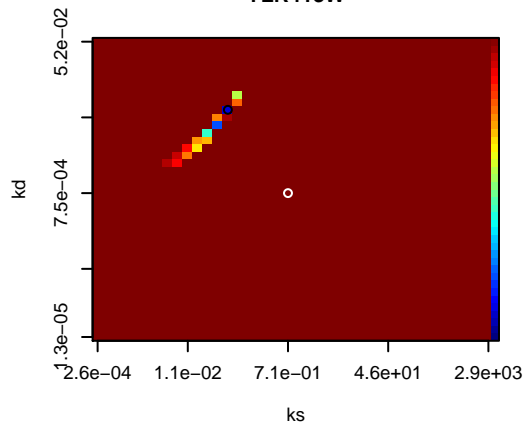

YMR074C

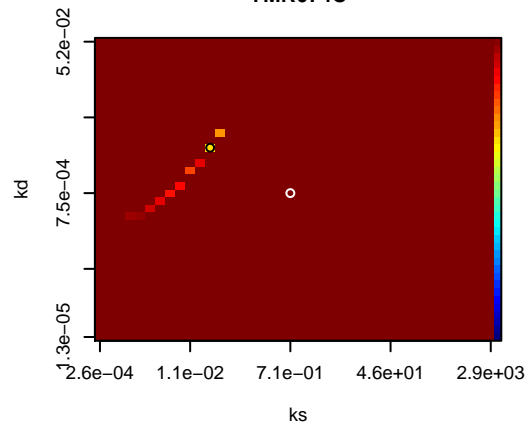

ASC1

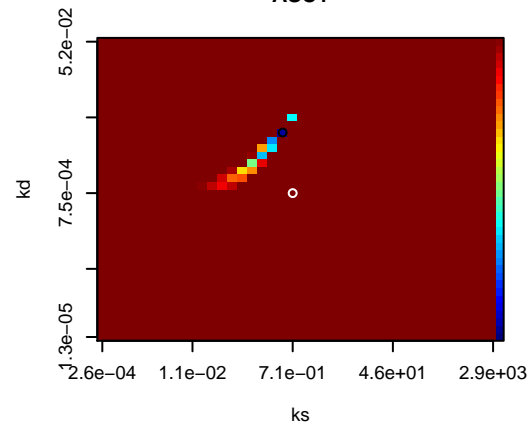

LIA1

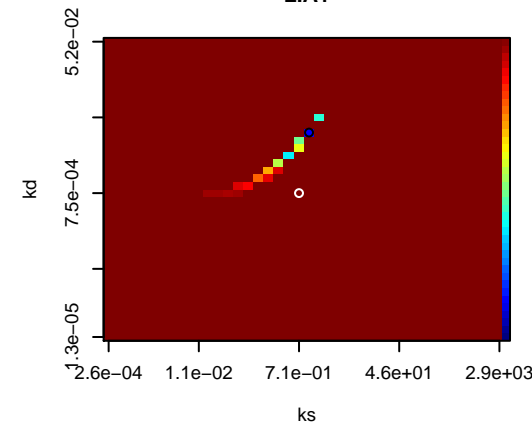

RPB8

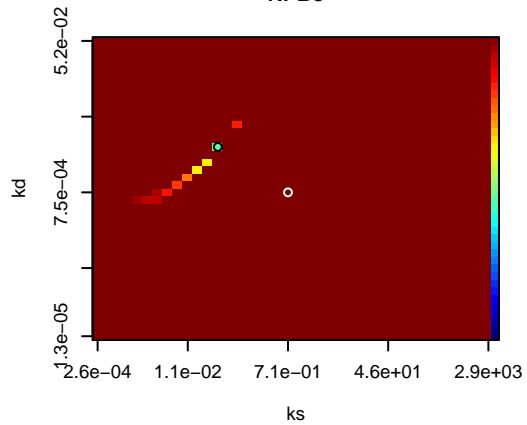

DBP7

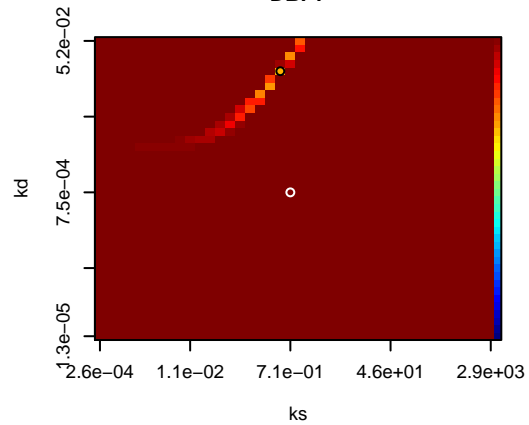

SMI1

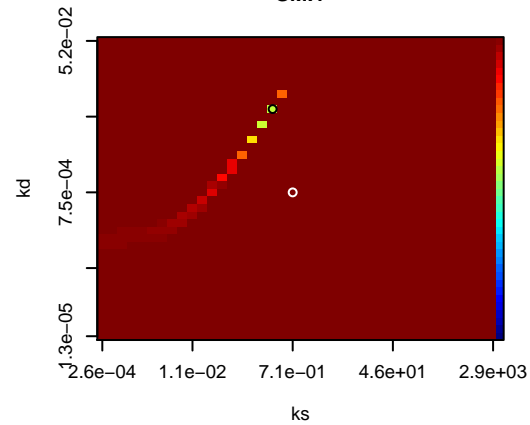

SEC7

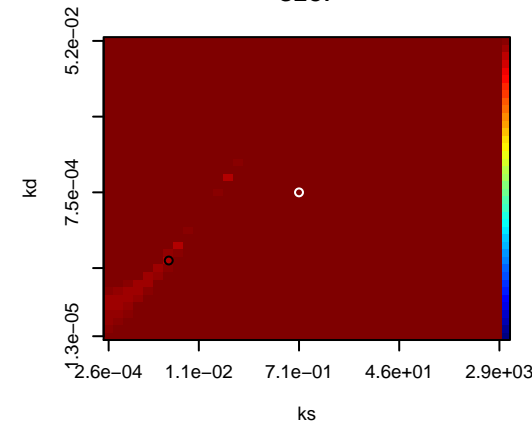

RPC10

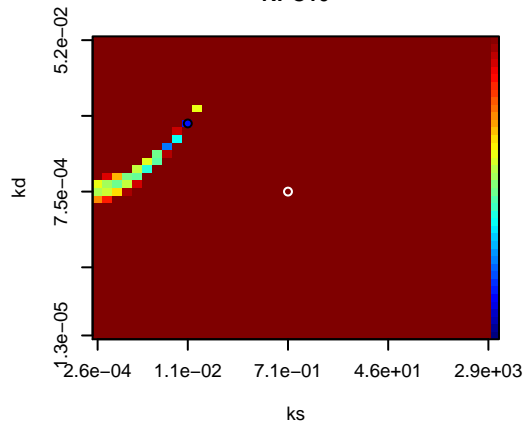

TSR4

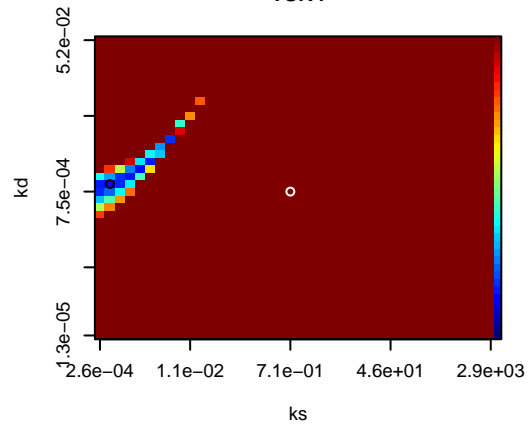

RPL30

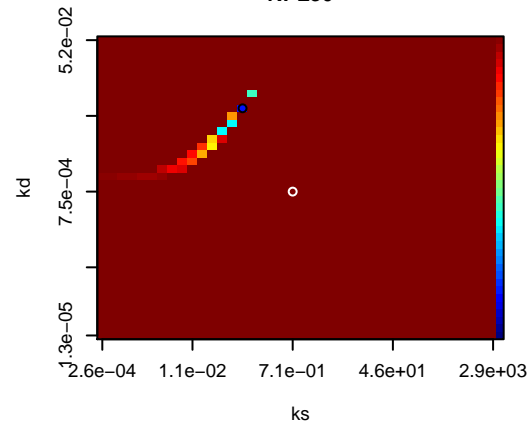

SPA2

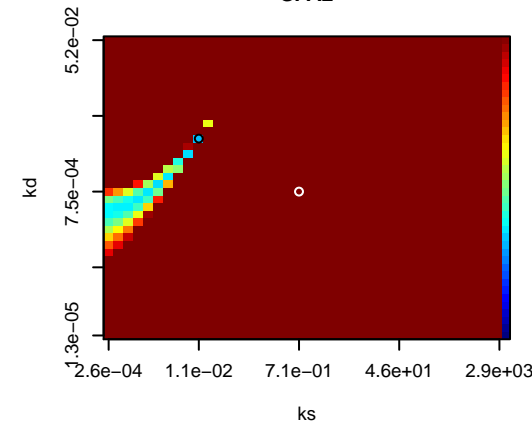

**EMC1**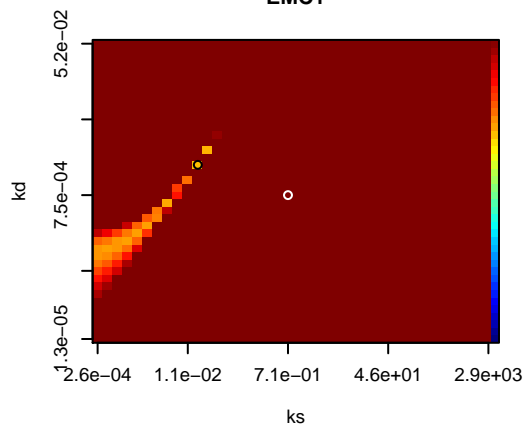**YDR089W**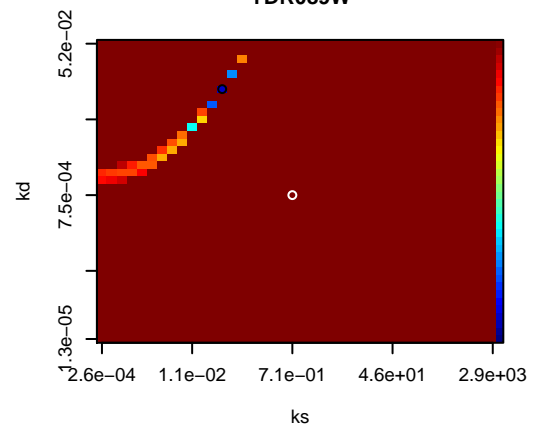**RPL34B**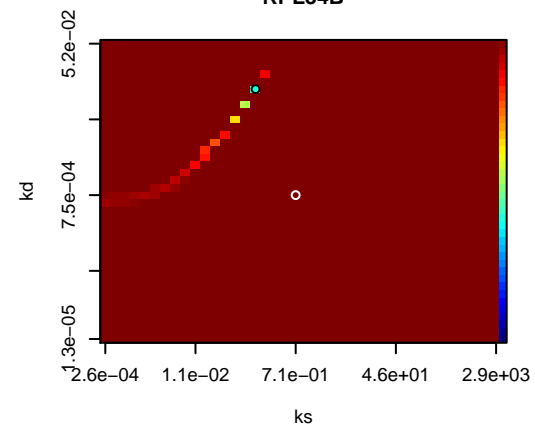

Supplement: c4mb00358f2.zip [file c4mb00358f2.zip]
